# Supplementary material for: Gut Microbial Changes Following Fecal Microbiota Transplantation for D-Lactic Acidosis in Two Children
Source: PubMed Central journal article supplement (PMC10435018; doi:10.1097/pg9.0000000000000319), 2023-06-09
Supplement: pg9-4-e319-s001.pdf [file pg9-4-e319-s001.pdf]

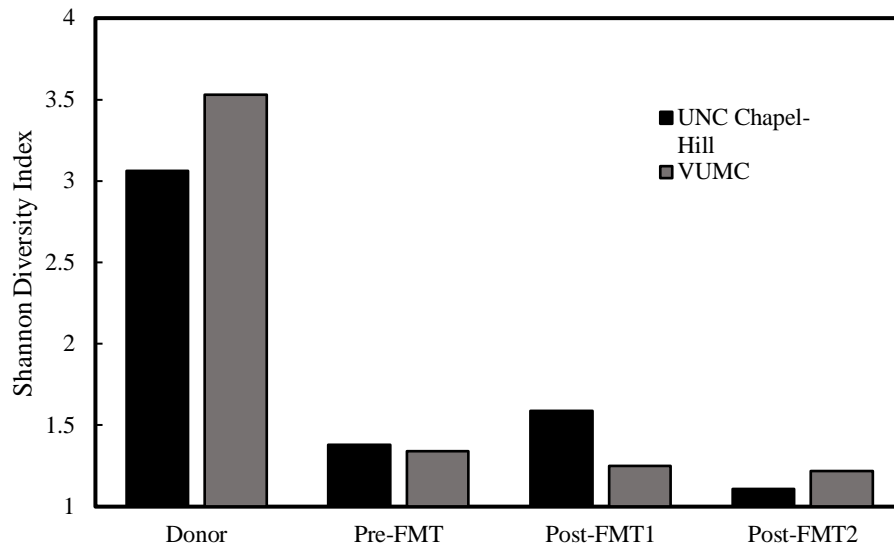

Supplemental Figure 1. Microbial diversity is lower in the D-LA patients' stool microbiota before and after FMT compared to the donors.
