# Supplementary material for: Gut Microbial Changes Following Fecal Microbiota Transplantation for D-Lactic Acidosis in Two Children
Source: PubMed Central journal article supplement (PMC10435018; doi:10.1097/pg9.0000000000000319), 2023-06-09
Supplement: pg9-4-e319-s002.pdf [file pg9-4-e319-s002.pdf]

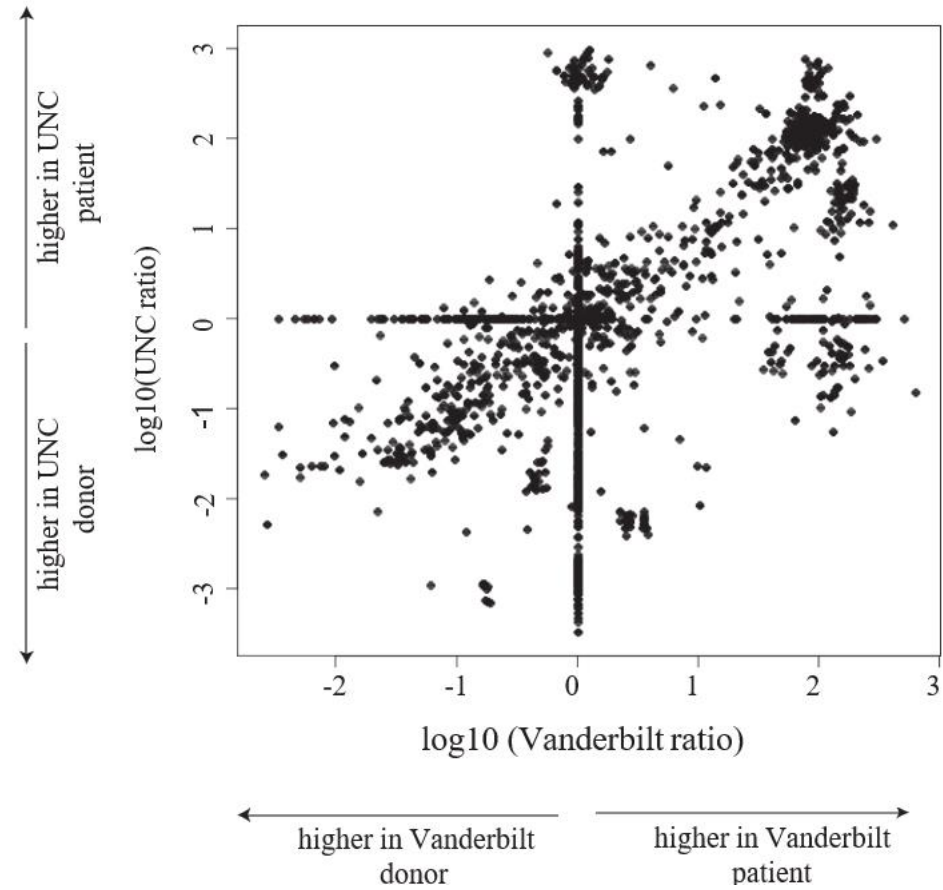

Supplemental Figure 2. For each gene from HumanN (see supplementary Table 1), the  $\log_{10}$  of the ratio of the average of all timepoints for each patient divided by the corresponding value for the donor. The x-axis show this ratio for the Vanderbilt patient and the y-axis show this ratio for the Chapel Hill patient.
