# Supplementary material for: Gut Microbial Changes Following Fecal Microbiota Transplantation for D-Lactic Acidosis in Two Children
Source: PubMed Central journal article supplement (PMC10435018; doi:10.1097/pg9.0000000000000319), 2023-06-09
Supplement: pg9-4-e319-s003.pdf [file pg9-4-e319-s003.pdf]

| Pathway                                                                                    |
|--------------------------------------------------------------------------------------------|
| PWY_6703__preQ0_biosynthesis_g_Veillonella_s_Veillonella_atypica                           |
| PWY_6700__queuosine_biosynthesis_g_Veillonella_s_Veillonella_atypica                       |
| PWY_5791__1,4_dihydroxy_2_naphthoate_biosynthesis_II_(plants)_g_Veillonella_s_Veillonella  |
| PWY_5837__1,4_dihydroxy_2_naphthoate_biosynthesis_I_g_Veillonella_s_Veillonella_atypica    |
| PWY_5686__UMP_biosynthesis_g_Veillonella_s_Veillonella_atypica                             |
| PWY_4242__pantothenate_and_coenzyme_A_biosynthesis_III_g_Veillonella_s_Veillonella_atyp    |
| PWY_5100__pyruvate_fermentation_to_acetate_and_lactate_II_g_Veillonella_s_Veillonella_aty  |
| PWY_7208__superpathway_of_pyrimidine_nucleobases_salvage_g_Veillonella_s_Veillonella_at    |
| PWY_5686__UMP_biosynthesis_g_Bifidobacterium_s_Bifidobacterium_breve                       |
| PWY_5188__tetrapyrrole_biosynthesis_I_(from_glutamate)_g_Veillonella_s_Veillonella_atypica |
| PWY_6125__superpathway_of_guanosine_nucleotides_de_novo_biosynthesis_II_g_Veillonella_s    |
| HEMESYN2_PWY__heme_biosynthesis_II_(anaerobic)_g_Veillonella_s_Veillonella_atypica         |
| PWY_5097__L_lysine_biosynthesis_VI_g_Veillonella_s_Veillonella_atypica                     |
| PWY_7221__guanosine_ribonucleotides_de_novo_biosynthesis_g_Veillonella_s_Veillonella_aty   |
| GLUTORN_PWY__L_ornithine_biosynthesis_g_Bifidobacterium_s_Bifidobacterium_breve            |
| UNINTEGRATED_g_Veillonella_s_Veillonella_atypica                                           |
| PWY_6121__5_aminoimidazole_ribonucleotide_biosynthesis_I_g_Veillonella_s_Veillonella_atyp  |
| PWY_7219__adenosine_ribonucleotides_de_novo_biosynthesis_g_Bifidobacterium_s_Bifidobac     |
| ARGSYNBSUB_PWY__L_arginine_biosynthesis_II_(acetyl_cycle)_g_Bifidobacterium_s_Bifidobact   |
| PWY_7111__pyruvate_fermentation_to_isobutanol_(engineered)_g_Bifidobacterium_s_Bifidob:    |
| PWY_7228__superpathway_of_guanosine_nucleotides_de_novo_biosynthesis_I_g_Veillonella_s     |
| ARGSYN_PWY__L_arginine_biosynthesis_I_(via_L_ornithine)_g_Bifidobacterium_s_Bifidobacteri  |
| PWY_7400__L_arginine_biosynthesis_IV_(archaeobacteria)_g_Bifidobacterium_s_Bifidobacteriun |
| PWY_7219__adenosine_ribonucleotides_de_novo_biosynthesis_g_Veillonella_s_Veillonella_aty   |
| PWY_6387__UDP_N_acetylmuramoyl_pentapeptide_biosynthesis_I_(meso_diaminopimelate_cont      |
| PWY_6126__superpathway_of_adenosine_nucleotides_de_novo_biosynthesis_II_g_Veillonella_s    |
| PWY_6122__5_aminoimidazole_ribonucleotide_biosynthesis_II_g_Bifidobacterium_s_Bifidobact   |
| PWY_6277__superpathway_of_5_aminoimidazole_ribonucleotide_biosynthesis_g_Bifidobacteriu    |
| PWY_2942__L_lysine_biosynthesis_III_g_Veillonella_s_Veillonella_atypica                    |
| PEPTIDOLYCANSYN_PWY__peptidoglycan_biosynthesis_I_(meso_diaminopimelate_containing)_g      |
| PWY_7229__superpathway_of_adenosine_nucleotides_de_novo_biosynthesis_I_g_Veillonella_s     |
| PWY_7111__pyruvate_fermentation_to_isobutanol_(engineered)_g_Veillonella_s_Veillonella_a   |
| VALSYN_PWY__L_valine_biosynthesis_g_Veillonella_s_Veillonella_atypica                      |
| PWY_6386__UDP_N_acetylmuramoyl_pentapeptide_biosynthesis_II_(lysine_containing)_g_Veillc   |
| COA_PWY_1__coenzyme_A_biosynthesis_II_(mammalian)_g_Veillonella_s_Veillonella_atypica      |
| UDPNAGSYN_PWY__UDP_N_acetyl_D_glucosamine_biosynthesis_I_g_Bifidobacterium_s_Bifido        |
| HISTSYN_PWY__L_histidine_biosynthesis_g_Veillonella_s_Veillonella_atypica                  |
| PWY_6122__5_aminoimidazole_ribonucleotide_biosynthesis_II_g_Veillonella_s_Veillonella_aty  |
| PWY_6277__superpathway_of_5_aminoimidazole_ribonucleotide_biosynthesis_g_Veillonella_s     |
| PWY_7220__adenosine_deoxyribonucleotides_de_novo_biosynthesis_II_g_Veillonella_s_Veillor   |
| PWY_7222__guanosine_deoxyribonucleotides_de_novo_biosynthesis_II_g_Veillonella_s_Veillor   |
| PWY_6936__seleno_amino_acid_biosynthesis_g_Bifidobacterium_s_Bifidobacterium_breve         |
| PWY_5913__TCA_cycle_VI_(obligate_autotrophs)_g_Escherichia_s_Escherichia_coli              |
| RIBOSYN2_PWY__flavin_biosynthesis_I_(bacteria_and_plants)_g_Escherichia_s_Escherichia_coli |
| PWY_6123__inosine_5__phosphate_biosynthesis_I_g_Bifidobacterium_s_Bifidobacterium_brev     |
| PWY_6151__S_adenosyl_L_methionine_cycle_I_g_Bifidobacterium_s_Bifidobacterium_breve        |

PWY\_6703\_\_preQ0\_biosynthesis\_g\_\_Escherichia\_s\_\_Escherichia\_coli  
 PWY\_7221\_\_guanosine\_ribonucleotides\_de\_novo\_biosynthesis\_g\_\_Bifidobacterium\_s\_\_Bifidobac  
 PANTO\_PWY\_\_phosphopantothenate\_biosynthesis\_I\_g\_\_Escherichia\_s\_\_Escherichia\_coli  
 PWY\_7254\_\_TCA\_cycle\_VII\_(acetate\_producers)\_g\_\_Escherichia\_s\_\_Escherichia\_coli  
 COA\_PWY\_\_coenzyme\_A\_biosynthesis\_I\_g\_\_Veillonella\_s\_\_Veillonella\_atypica  
 PWY\_6737\_\_starch\_degradation\_V\_g\_\_Escherichia\_s\_\_Escherichia\_coli  
 PWY\_1269\_\_CMP\_3\_deoxy\_D\_manno\_octulosonate\_biosynthesis\_I\_g\_\_Escherichia\_s\_\_Escherichi  
 PWY\_5103\_\_L\_isoleucine\_biosynthesis\_III\_g\_\_Bifidobacterium\_s\_\_Bifidobacterium\_breve  
 PWY\_2723\_\_trehalose\_degradation\_V  
 PYRIDNUCSAL\_PWY\_\_NAD\_salvage\_pathway\_I\_g\_\_Escherichia\_s\_\_Escherichia\_coli  
 PWY\_5189\_\_tetrapyrrole\_biosynthesis\_II\_(from\_glycine)\_g\_\_Escherichia\_s\_\_Escherichia\_coli  
 ILEUSYN\_PWY\_\_L\_isoleucine\_biosynthesis\_I\_(from\_threonine)\_g\_\_Bifidobacterium\_s\_\_Bifidobact  
 VALSYN\_PWY\_\_L\_valine\_biosynthesis\_g\_\_Bifidobacterium\_s\_\_Bifidobacterium\_breve  
 PWY\_6353\_\_purine\_nucleotides\_degradation\_II\_(aerobic)\_g\_\_Escherichia\_s\_\_Escherichia\_coli  
 HEMESYN2\_PWY\_\_heme\_biosynthesis\_II\_(anaerobic)\_g\_\_Escherichia\_s\_\_Escherichia\_coli  
 GLUCUROCAT\_PWY\_\_superpathway\_of\_&beta\_\_D\_glucuronide\_and\_D\_glucuronate\_degradation\_  
 SULFATE\_CYS\_PWY\_\_superpathway\_of\_sulfate\_assimilation\_and\_cysteine\_biosynthesis\_g\_\_Esche  
 PYRIDNUCSYN\_PWY\_\_NAD\_biosynthesis\_I\_(from\_aspartate)\_g\_\_Escherichia\_s\_\_Escherichia\_coli  
 BRANCHED\_CHAIN\_AA\_SYN\_PWY\_\_superpathway\_of\_branched\_amino\_acid\_biosynthesis\_g\_\_Bif  
 FASYN\_INITIAL\_PWY\_\_superpathway\_of\_fatty\_acid\_biosynthesis\_initiation\_(E\_coli)\_g\_\_Eschericl  
 PWY\_5861\_\_superpathway\_of\_demethylmenaquinol\_8\_biosynthesis\_g\_\_Escherichia\_s\_\_Escheric  
 HCAMHPDEG\_PWY\_\_3\_phenylpropanoate\_and\_3\_(3\_hydroxyphenyl)propanoate\_degradation\_to\_  
 PWY\_6690\_\_cinnamate\_and\_3\_hydroxycinnamate\_degradation\_to\_2\_oxopent\_4\_enoate  
 PWY\_5863\_\_superpathway\_of\_phylloquinol\_biosynthesis\_g\_\_Escherichia\_s\_\_Escherichia\_coli  
 AEROBACTINSYN\_PWY\_\_aerobactin\_biosynthesis  
 AEROBACTINSYN\_PWY\_\_aerobactin\_biosynthesis\_g\_\_Escherichia\_s\_\_Escherichia\_coli  
 GLCMANNANAUT\_PWY\_\_superpathway\_of\_N\_acetylglucosamine,\_N\_acetylmannosamine\_and\_N  
 UBISYN\_PWY\_\_superpathway\_of\_ubiquinol\_8\_biosynthesis\_(prokaryotic)\_g\_\_Escherichia\_s\_\_Esch  
 PANTOSYN\_PWY\_\_pantothenate\_and\_coenzyme\_A\_biosynthesis\_I\_g\_\_Escherichia\_s\_\_Escherichia  
 PWY\_7269\_\_NAD\_NADP\_NADH\_NADPH\_mitochondrial\_interconversion\_(yeast)  
 PWY\_6527\_\_stachyose\_degradation\_g\_\_Escherichia\_s\_\_Escherichia\_coli  
 PWY\_6629\_\_superpathway\_of\_L\_tryptophan\_biosynthesis\_g\_\_Escherichia\_s\_\_Escherichia\_coli  
 PWY\_6700\_\_queuosine\_biosynthesis\_g\_\_Escherichia\_s\_\_Escherichia\_coli  
 PWY\_6507\_\_4\_deoxy\_L\_threo\_hex\_4\_enopyranuronate\_degradation\_g\_\_Escherichia\_s\_\_Escheric  
 SER\_GLYSYN\_PWY\_\_superpathway\_of\_L\_serine\_and\_glycine\_biosynthesis\_I\_g\_\_Escherichia\_s\_\_Es  
 PWY\_7242\_\_D\_fructuronate\_degradation\_g\_\_Escherichia\_s\_\_Escherichia\_coli  
 UNINTEGRATED\_g\_\_Bifidobacterium\_s\_\_Bifidobacterium\_breve  
 GLYCOLYSIS\_TCA\_GLYOX\_BYPASS\_\_superpathway\_of\_glycolysis,\_pyruvate\_dehydrogenase,\_TCA,\_  
 PWY\_6282\_\_palmitoleate\_biosynthesis\_I\_(from\_(5Z)\_dodec\_5\_enoate)\_g\_\_Escherichia\_s\_\_Esche  
 PWY\_5838\_\_superpathway\_of\_menaquinol\_8\_biosynthesis\_I\_g\_\_Escherichia\_s\_\_Escherichia\_coli  
 PWY\_5989\_\_stearate\_biosynthesis\_II\_(bacteria\_and\_plants)\_g\_\_Escherichia\_s\_\_Escherichia\_coli  
 PWY\_5173\_\_superpathway\_of\_acetyl\_CoA\_biosynthesis\_g\_\_Escherichia\_s\_\_Escherichia\_coli  
 PWY\_7269\_\_NAD\_NADP\_NADH\_NADPH\_mitochondrial\_interconversion\_(yeast)\_g\_\_Escherichia\_s  
 PWY\_6163\_\_chorismate\_biosynthesis\_from\_3\_dehydroquinone\_g\_\_Escherichia\_s\_\_Escherichia\_cc  
 GALACT\_GLUCUROCAT\_PWY\_\_superpathway\_of\_hexuronide\_and\_hexuronate\_degradation\_g\_\_E  
 HCAMHPDEG\_PWY\_\_3\_phenylpropanoate\_and\_3\_(3\_hydroxyphenyl)propanoate\_degradation\_to\_  
 PWY\_6690\_\_cinnamate\_and\_3\_hydroxycinnamate\_degradation\_to\_2\_oxopent\_4\_enoate\_g\_\_Esch

PWY\_6386\_\_UDP\_N\_acetylmuramoyl\_pentapeptide\_biosynthesis\_II\_(lysine\_containing)\_g\_Esche  
 PWY\_6317\_\_galactose\_degradation\_I\_(Leloir\_pathway)\_g\_Escherichia\_s\_Escherichia\_coli  
 PWY\_6892\_\_thiazole\_biosynthesis\_I\_(E\_coli)\_g\_Escherichia\_s\_Escherichia\_coli  
 PWY0\_1297\_\_superpathway\_of\_purine\_deoxyribonucleosides\_degradation\_g\_Escherichia\_s\_Es  
 PWY\_6519\_\_8\_amino\_7\_oxononanoate\_biosynthesis\_I\_g\_Escherichia\_s\_Escherichia\_coli  
 FASYN\_ELONG\_PWY\_\_fatty\_acid\_elongation\_\_saturated\_g\_Escherichia\_s\_Escherichia\_coli  
 PWY\_5897\_\_superpathway\_of\_menaquinol\_11\_biosynthesis\_g\_Escherichia\_s\_Escherichia\_coli  
 PWY\_5898\_\_superpathway\_of\_menaquinol\_12\_biosynthesis\_g\_Escherichia\_s\_Escherichia\_coli  
 PWY\_5899\_\_superpathway\_of\_menaquinol\_13\_biosynthesis\_g\_Escherichia\_s\_Escherichia\_coli  
 ARO\_PWY\_\_chorismate\_biosynthesis\_I\_g\_Escherichia\_s\_Escherichia\_coli  
 COMPLETE\_ARO\_PWY\_\_superpathway\_of\_aromatic\_amino\_acid\_biosynthesis\_g\_Escherichia\_s\_\_  
 BIOTIN\_BIOSYNTHESIS\_PWY\_\_biotin\_biosynthesis\_I\_g\_Escherichia\_s\_Escherichia\_coli  
 PWY\_7409\_\_phospholipid\_remodeling\_(phosphatidylethanolamine,\_yeast)\_g\_Escherichia\_s\_Es  
 ECASYN\_PWY\_\_enterobacterial\_common\_antigen\_biosynthesis\_g\_Escherichia\_s\_Escherichia\_cc  
 GALACTUROCAT\_PWY\_\_D\_galacturonate\_degradation\_I\_g\_Escherichia\_s\_Escherichia\_coli  
 PWY\_7664\_\_oleate\_biosynthesis\_IV\_(anaerobic)\_g\_Escherichia\_s\_Escherichia\_coli  
 PWY0\_1533\_\_methylphosphonate\_degradation\_I  
 MET\_SAM\_PWY\_\_superpathway\_of\_S\_adenosyl\_L\_methionine\_biosynthesis\_g\_Escherichia\_s\_E  
 METSYN\_PWY\_\_L\_homoserine\_and\_L\_methionine\_biosynthesis\_g\_Escherichia\_s\_Escherichia\_c  
 PWY\_6823\_\_molybdenum\_cofactor\_biosynthesis\_g\_Escherichia\_s\_Escherichia\_coli  
 PWY\_5347\_\_superpathway\_of\_L\_methionine\_biosynthesis\_(transsulfuration)\_g\_Escherichia\_s\_\_  
 PWY0\_1533\_\_methylphosphonate\_degradation\_I\_g\_Escherichia\_s\_Escherichia\_coli  
 GLYCOLYSIS\_E\_D\_\_superpathway\_of\_glycolysis\_and\_Entner\_Doudoroff\_g\_Escherichia\_s\_Escher  
 PWY\_6305\_\_putrescine\_biosynthesis\_IV\_g\_Escherichia\_s\_Escherichia\_coli  
 PWY\_5791\_\_1,4\_dihydroxy\_2\_naphthoate\_biosynthesis\_II\_(plants)\_g\_Escherichia\_s\_Escherichia  
 PWY\_5837\_\_1,4\_dihydroxy\_2\_naphthoate\_biosynthesis\_I\_g\_Escherichia\_s\_Escherichia\_coli  
 PWY\_5840\_\_superpathway\_of\_menaquinol\_7\_biosynthesis\_g\_Escherichia\_s\_Escherichia\_coli  
 PWY\_5845\_\_superpathway\_of\_menaquinol\_9\_biosynthesis\_g\_Escherichia\_s\_Escherichia\_coli  
 PWY\_5850\_\_superpathway\_of\_menaquinol\_6\_biosynthesis\_I\_g\_Escherichia\_s\_Escherichia\_coli  
 PWY\_5896\_\_superpathway\_of\_menaquinol\_10\_biosynthesis\_g\_Escherichia\_s\_Escherichia\_coli  
 PEPTIDOLYCANSYN\_PWY\_\_peptidoglycan\_biosynthesis\_I\_(meso\_diaminopimelate\_containing)\_g  
 PWY\_6385\_\_peptidoglycan\_biosynthesis\_III\_(mycobacteria)\_g\_Escherichia\_s\_Escherichia\_coli  
 ECASYN\_PWY\_\_enterobacterial\_common\_antigen\_biosynthesis  
 PWY\_1042\_\_glycolysis\_IV\_(plant\_cytosol)\_g\_Escherichia\_s\_Escherichia\_coli  
 PWY\_5860\_\_superpathway\_of\_demethylmenaquinol\_6\_biosynthesis\_I\_g\_Escherichia\_s\_Escheri  
 PWY\_5862\_\_superpathway\_of\_demethylmenaquinol\_9\_biosynthesis\_g\_Escherichia\_s\_Escheric  
 PWY\_6387\_\_UDP\_N\_acetylmuramoyl\_pentapeptide\_biosynthesis\_I\_(meso\_diaminopimelate\_con  
 PWY\_4041\_\_&gamma\_\_glutamyl\_cycle\_unclassified  
 ENTBACSYN\_PWY\_\_enterobactin\_biosynthesis\_g\_Escherichia\_s\_Escherichia\_coli  
 PWY\_4702\_\_phytate\_degradation\_I\_g\_Escherichia\_s\_Escherichia\_coli  
 PWY\_5083\_\_NAD\_NADH\_phosphorylation\_and\_dephosphorylation\_g\_Escherichia\_s\_Escherichia  
 PWY\_5686\_\_UMP\_biosynthesis\_g\_Escherichia\_s\_Escherichia\_coli  
 PWY0\_1061\_\_superpathway\_of\_L\_alanine\_biosynthesis\_g\_Escherichia\_s\_Escherichia\_coli  
 PWY\_6823\_\_molybdenum\_cofactor\_biosynthesis  
 PWY\_621\_\_sucrose\_degradation\_III\_(sucrose\_invertase)\_g\_Escherichia\_s\_Escherichia\_coli  
 TRPSYN\_PWY\_\_L\_tryptophan\_biosynthesis\_g\_Escherichia\_s\_Escherichia\_coli  
 ILEUSYN\_PWY\_\_L\_isoleucine\_biosynthesis\_I\_(from\_threonine)\_g\_Escherichia\_s\_Escherichia\_coli

VALSYN\_PWY\_L\_valine\_biosynthesis\_g\_Escherichia\_s\_Escherichia\_coli  
PWY\_6630\_superpathway\_of\_L\_tyrosine\_biosynthesis\_g\_Escherichia\_s\_Escherichia\_coli  
PWY\_7315\_dTDP\_N\_acetylthomosamine\_biosynthesis\_g\_Escherichia\_s\_Escherichia\_coli  
GLYCOGENSYNTH\_PWY\_glycogen\_biosynthesis\_I\_(from\_ADP\_D\_Glucose)\_g\_Escherichia\_s\_Esc  
GLYCOLYSIS\_glycolysis\_I\_(from\_glucose\_6\_phosphate)\_g\_Escherichia\_s\_Escherichia\_coli  
PWY\_5188\_tetrapyrrole\_biosynthesis\_I\_(from\_glutamate)\_g\_Escherichia\_s\_Escherichia\_coli  
PWY0\_1586\_peptidoglycan\_maturation\_(meso\_diaminopimelate\_containing)\_g\_Escherichia\_s\_  
NAD\_BIOSYNTHESIS\_II\_NAD\_salvage\_pathway\_II\_g\_Escherichia\_s\_Escherichia\_coli  
PWY\_5695\_urate\_biosynthesis\_inosine\_5\_phosphate\_degradation\_g\_Escherichia\_s\_Escheric  
PWY0\_1277\_3\_phenylpropanoate\_and\_3\_(3\_hydroxyphenyl)propanoate\_degradation\_g\_Escher  
PWY\_6628\_superpathway\_of\_L\_phenylalanine\_biosynthesis\_g\_Escherichia\_s\_Escherichia\_coli  
P461\_PWY\_hexitol\_fermentation\_to\_lactate,formate,ethanol\_and\_acetate\_g\_Escherichia\_s\_  
THRESYN\_PWY\_superpathway\_of\_L\_threonine\_biosynthesis\_g\_Escherichia\_s\_Escherichia\_coli  
PHOSLIPSYN\_PWY\_superpathway\_of\_phospholipid\_biosynthesis\_I\_(bacteria)\_g\_Escherichia\_s\_  
PWY66\_400\_glycolysis\_VI\_(metazoan)\_g\_Escherichia\_s\_Escherichia\_coli  
PWY\_6151\_S\_adenosyl\_L\_methionine\_cycle\_I\_g\_Escherichia\_s\_Escherichia\_coli  
PWY\_4242\_pantothenate\_and\_coenzyme\_A\_biosynthesis\_III\_g\_Escherichia\_s\_Escherichia\_coli  
PWY\_5855\_ubiquinol\_7\_biosynthesis\_(prokaryotic)\_g\_Escherichia\_s\_Escherichia\_coli  
PWY\_5856\_ubiquinol\_9\_biosynthesis\_(prokaryotic)\_g\_Escherichia\_s\_Escherichia\_coli  
PWY\_5857\_ubiquinol\_10\_biosynthesis\_(prokaryotic)\_g\_Escherichia\_s\_Escherichia\_coli  
PWY\_6708\_ubiquinol\_8\_biosynthesis\_(prokaryotic)\_g\_Escherichia\_s\_Escherichia\_coli  
PWY\_5484\_glycolysis\_II\_(from\_fructose\_6\_phosphate)\_g\_Escherichia\_s\_Escherichia\_coli  
HOMOSER\_METSYN\_PWY\_L\_methionine\_biosynthesis\_I\_g\_Escherichia\_s\_Escherichia\_coli  
SO4ASSIM\_PWY\_sulfate\_reduction\_I\_(assimilatory)\_g\_Escherichia\_s\_Escherichia\_coli  
PWY\_7219\_adenosine\_ribonucleotides\_de\_novo\_biosynthesis\_g\_Escherichia\_s\_Escherichia\_cc  
PWY\_7111\_pyruvate\_fermentation\_to\_isobutanol\_(engineered)\_g\_Escherichia\_s\_Escherichia\_  
ARGSYN\_PWY\_L\_arginine\_biosynthesis\_I\_(via\_L\_ornithine)\_g\_Escherichia\_s\_Escherichia\_coli  
PWY\_7388\_octanoyl\_[acyl\_carrier\_protein]\_biosynthesis\_(mitochondria, yeast)\_g\_Escherichia\_  
PWY0\_862\_(5Z)\_dodec\_5\_enoate\_biosynthesis\_g\_Escherichia\_s\_Escherichia\_coli  
PWY\_6147\_6\_hydroxymethyl\_dihydropterin\_diphosphate\_biosynthesis\_I\_g\_Escherichia\_s\_Esc  
PWY\_7221\_guanosine\_ribonucleotides\_de\_novo\_biosynthesis\_g\_Escherichia\_s\_Escherichia\_cc  
AST\_PWY\_L\_arginine\_degradation\_II\_(AST\_pathway)  
KDO\_NAGLIPASYN\_PWY\_superpathway\_of\_(Kdo)2\_lipid\_A\_biosynthesis\_g\_Escherichia\_s\_Esch  
PWY0\_1296\_purine\_ribonucleosides\_degradation\_g\_Escherichia\_s\_Escherichia\_coli  
PWY66\_422\_D\_galactose\_degradation\_V\_(Leloir\_pathway)\_g\_Escherichia\_s\_Escherichia\_coli  
GLUTORN\_PWY\_L\_ornithine\_biosynthesis\_g\_Escherichia\_s\_Escherichia\_coli  
SALVADEHYPOX\_PWY\_adenosine\_nucleotides\_degradation\_II\_g\_Escherichia\_s\_Escherichia\_co  
PWY\_6608\_guanosine\_nucleotides\_degradation\_III\_g\_Escherichia\_s\_Escherichia\_coli  
PWY\_7409\_phospholipid\_remodeling\_(phosphatidylethanolamine, yeast)  
PWY\_4041\_&gamma\_glutamyl\_cycle\_g\_Escherichia\_s\_Escherichia\_coli  
GLYOXYLATE\_BYPASS\_glyoxylate\_cycle\_g\_Escherichia\_s\_Escherichia\_coli  
PWY\_7234\_inosine\_5\_phosphate\_biosynthesis\_III\_g\_Escherichia\_s\_Escherichia\_coli  
FUCCAT\_PWY\_fucose\_degradation\_g\_Escherichia\_s\_Escherichia\_coli  
PWY0\_1261\_anhydromuropeptides\_recycling\_g\_Escherichia\_s\_Escherichia\_coli  
PWY\_5138\_unsaturated\_even\_numbered\_fatty\_acid\_&beta\_oxidation\_g\_Escherichia\_s\_Esch  
PWY\_6124\_inosine\_5\_phosphate\_biosynthesis\_II\_g\_Escherichia\_s\_Escherichia\_coli  
HISTSYN\_PWY\_L\_histidine\_biosynthesis\_g\_Escherichia\_s\_Escherichia\_coli

PWY\_5705\_allantoin\_degradation\_to\_glyoxylate\_III\_g\_Escherichia\_s\_Escherichia\_coli  
 PWY\_6123\_inosine\_5\_phosphate\_biosynthesis\_I\_g\_Escherichia\_s\_Escherichia\_coli  
 PWY\_7663\_gondoate\_biosynthesis\_(anaerobic)\_g\_Escherichia\_s\_Escherichia\_coli  
 PWY\_2723\_trehalose\_degradation\_V\_g\_Escherichia\_s\_Escherichia\_coli  
 FUC\_RHAMCAT\_PWY\_superpathway\_of\_fucose\_and\_rhamnose\_degradation\_g\_Escherichia\_s\_  
 PWY\_5136\_fatty\_acid\_&beta\_oxidation\_II\_(peroxisome)\_g\_Escherichia\_s\_Escherichia\_coli  
 ANAGLYCOLYSIS\_PWY\_glycolysis\_III\_(from\_glucose)\_g\_Escherichia\_s\_Escherichia\_coli  
 TCA\_GLYOX\_BYPASS\_superpathway\_of\_glyoxylate\_bypass\_and\_TCA\_g\_Escherichia\_s\_Escheric  
 FAO\_PWY\_fatty\_acid\_&beta\_oxidation\_I\_g\_Escherichia\_s\_Escherichia\_coli  
 GLYCOL\_GLYOXDEG\_PWY\_superpathway\_of\_glycol\_metabolism\_and\_degradation\_g\_Escherichi  
 PWY\_6969\_TCA\_cycle\_V\_(2\_oxoglutarate\_ferredoxin\_oxidoreductase)\_g\_Escherichia\_s\_Escher  
 P105\_PWY\_TCA\_cycle\_IV\_(2\_oxoglutarate\_decarboxylase)\_g\_Escherichia\_s\_Escherichia\_coli  
 PWY0\_1241\_ADP\_L\_glycero\_&beta\_D\_manno\_heptose\_biosynthesis\_g\_Escherichia\_s\_Escher  
 UDPNAGSYN\_PWY\_UDP\_N\_acetyl\_D\_glucosamine\_biosynthesis\_I\_g\_Escherichia\_s\_Escherichia  
 AST\_PWY\_L\_arginine\_degradation\_II\_(AST\_pathway)\_g\_Escherichia\_s\_Escherichia\_coli  
 POLYAMSYN\_PWY\_superpathway\_of\_polyamine\_biosynthesis\_I\_g\_Escherichia\_s\_Escherichia\_  
 PWY\_6609\_adenine\_and\_adenosine\_salvage\_III\_g\_Escherichia\_s\_Escherichia\_coli  
 PWY0\_1338\_polymyxin\_resistance  
 POLYISOPRENSYN\_PWY\_polyisoprenoid\_biosynthesis\_(E\_coli)\_g\_Escherichia\_s\_Escherichia\_c  
 PWY0\_1338\_polymyxin\_resistance\_g\_Escherichia\_s\_Escherichia\_coli  
 TCA\_TCA\_cycle\_I\_(prokaryotic)\_g\_Escherichia\_s\_Escherichia\_coli  
 PWY\_6936\_seleno\_amino\_acid\_biosynthesis\_g\_Escherichia\_s\_Escherichia\_coli  
 PWY\_6612\_superpathway\_of\_tetrahydrofolate\_biosynthesis\_g\_Escherichia\_s\_Escherichia\_coli  
 PWY\_7315\_dTDP\_N\_acetylthomosamine\_biosynthesis  
 PWY\_6859\_all\_trans\_farnesol\_biosynthesis\_g\_Escherichia\_s\_Escherichia\_coli  
 PWY\_6897\_thiamin\_salvage\_II\_g\_Escherichia\_s\_Escherichia\_coli  
 ORNDEG\_PWY\_superpathway\_of\_ornithine\_degradation\_g\_Escherichia\_s\_Escherichia\_coli  
 PWY\_5659\_GDP\_mannose\_biosynthesis\_g\_Escherichia\_s\_Escherichia\_coli  
 ARGDEG\_PWY\_superpathway\_of\_L\_arginine\_putrescine\_and\_4\_aminobutanoate\_degradation\_  
 ORNARGDEG\_PWY\_superpathway\_of\_L\_arginine\_and\_L\_ornithine\_degradation\_g\_Escherichia\_  
 PWY4FS\_7\_phosphatidylglycerol\_biosynthesis\_I\_(plastidic)\_g\_Escherichia\_s\_Escherichia\_coli  
 PWY4FS\_8\_phosphatidylglycerol\_biosynthesis\_II\_(non\_plastidic)\_g\_Escherichia\_s\_Escherichia\_  
 PWY\_561\_superpathway\_of\_glyoxylate\_cycle\_and\_fatty\_acid\_degradation\_g\_Escherichia\_s\_Es  
 GALACTARDEG\_PWY\_D\_galactarate\_degradation\_I\_g\_Escherichia\_s\_Escherichia\_coli  
 GLUCARGALACTSUPER\_PWY\_superpathway\_of\_D\_glucarate\_and\_D\_galactarate\_degradation\_g\_  
 PWY\_6731\_starch\_degradation\_III  
 THRESYN\_PWY\_superpathway\_of\_L\_threonine\_biosynthesis\_g\_Lactobacillus\_s\_Lactobacillus\_v  
 PWY\_5690\_TCA\_cycle\_II\_(plants\_and\_fungi)\_g\_Escherichia\_s\_Escherichia\_coli  
 PWY0\_1298\_superpathway\_of\_pyrimidine\_deoxyribonucleosides\_degradation\_g\_Escherichia\_s\_  
 FOLSYN\_PWY\_superpathway\_of\_tetrahydrofolate\_biosynthesis\_and\_salvage\_g\_Escherichia\_s\_  
 UNINTEGRATED\_g\_Lactobacillus\_s\_Lactobacillus\_reuteri  
 KDO\_NAGLIPASYN\_PWY\_superpathway\_of\_(Kdo)2\_lipid\_A\_biosynthesis  
 PWY0\_1277\_3\_phenylpropanoate\_and\_3\_(3\_hydroxyphenyl)propanoate\_degradation  
 ASPASN\_PWY\_superpathway\_of\_L\_aspartate\_and\_L\_asparagine\_biosynthesis\_g\_Escherichia\_s\_  
 PWY\_3841\_folate\_transformations\_II\_g\_Escherichia\_s\_Escherichia\_coli  
 UNINTEGRATED\_g\_Escherichia\_s\_Escherichia\_coli  
 PWY\_7663\_gondoate\_biosynthesis\_(anaerobic)\_g\_Lactobacillus\_s\_Lactobacillus\_vaginalis

PWY\_5667\_CDP\_diacylglycerol\_biosynthesis\_I\_g\_Escherichia\_s\_Escherichia\_coli  
PWY0\_1319\_CDP\_diacylglycerol\_biosynthesis\_II\_g\_Escherichia\_s\_Escherichia\_coli  
COA\_PWY\_1\_coenzyme\_A\_biosynthesis\_II\_(mammalian)\_g\_Escherichia\_s\_Escherichia\_coli  
COBALSYN\_PWY\_adenosylcobalamin\_salvage\_from\_cobinamide\_I\_g\_Escherichia\_s\_Escherichia\_coli  
PWY\_6803\_phosphatidylcholine\_acyl\_editing\_g\_Escherichia\_s\_Escherichia\_coli  
PWY\_6387\_UDP\_N\_acetylmuramoyl\_pentapeptide\_biosynthesis\_I\_(meso\_diaminopimelate\_containing)\_g\_Escherichia\_s\_Escherichia\_coli  
RHAMCAT\_PWY\_L\_rhamnose\_degradation\_I\_g\_Escherichia\_s\_Escherichia\_coli  
PWY\_5384\_sucrose\_degradation\_IV\_(sucrose\_phosphorylase)\_g\_Escherichia\_s\_Escherichia\_coli  
GLUCOSE1PMETAB\_PWY\_glucose\_and\_glucose\_1\_phosphate\_degradation\_g\_Escherichia\_s\_Escherichia\_coli  
PWY\_2941\_L\_lysine\_biosynthesis\_II\_g\_Lactobacillus\_s\_Lactobacillus\_vaginalis  
PEPTIDOGLYCANSYN\_PWY\_peptidoglycan\_biosynthesis\_I\_(meso\_diaminopimelate\_containing)\_g\_Lactobacillus\_s\_Lactobacillus\_vaginalis  
PWY\_5097\_L\_lysine\_biosynthesis\_VI\_g\_Lactobacillus\_s\_Lactobacillus\_vaginalis  
ORNDEG\_PWY\_superpathway\_of\_ornithine\_degradation  
PWY\_7357\_thiamin\_formation\_from\_pyriothiamine\_and\_oxythiamine\_(yeast)\_g\_Escherichia\_s\_Escherichia\_coli  
PWY\_6891\_thiazole\_biosynthesis\_II\_(Bacillus)  
COA\_PWY\_coenzyme\_A\_biosynthesis\_I\_g\_Escherichia\_s\_Escherichia\_coli  
PWY\_6386\_UDP\_N\_acetylmuramoyl\_pentapeptide\_biosynthesis\_II\_(lysine\_containing)\_g\_Lactobacillus\_s\_Lactobacillus\_salivarius  
1CMET2\_PWY\_N10\_formyl\_tetrahydrofolate\_biosynthesis\_g\_Escherichia\_s\_Escherichia\_coli  
PWY\_2942\_L\_lysine\_biosynthesis\_III\_g\_Lactobacillus\_s\_Lactobacillus\_vaginalis  
PWY\_5973\_cis\_vaccenate\_biosynthesis\_g\_Lactobacillus\_s\_Lactobacillus\_vaginalis  
PWY\_724\_superpathway\_of\_L\_lysine,\_L\_threonine\_and\_L\_methionine\_biosynthesis\_II\_g\_Lactobacillus\_s\_Lactobacillus\_salivarius  
PWY\_6121\_5\_aminimidazole\_ribonucleotide\_biosynthesis\_I\_g\_Escherichia\_s\_Escherichia\_coli  
PWY\_6121\_5\_aminimidazole\_ribonucleotide\_biosynthesis\_I\_g\_Lactobacillus\_s\_Lactobacillus\_salivarius  
NAGLIPASYN\_PWY\_lipid\_IVA\_biosynthesis\_g\_Escherichia\_s\_Escherichia\_coli  
GLYCOL\_GLYOXDEG\_PWY\_superpathway\_of\_glycol\_metabolism\_and\_degradation  
UNINTEGRATED\_g\_Lactobacillus\_s\_Lactobacillus\_vaginalis  
PWY\_7357\_thiamin\_formation\_from\_pyriothiamine\_and\_oxythiamine\_(yeast)\_g\_Lactobacillus\_s\_Lactobacillus\_salivarius  
PWY\_3841\_folate\_transformations\_II\_g\_Lactobacillus\_s\_Lactobacillus\_salivarius  
METHGLYUT\_PWY\_superpathway\_of\_methylglyoxal\_degradation\_g\_Escherichia\_s\_Escherichia\_coli  
PWY\_6123\_inosine\_5\_phosphate\_biosynthesis\_I\_g\_Lactobacillus\_s\_Lactobacillus\_salivarius  
PWY\_7663\_gondoate\_biosynthesis\_(anaerobic)\_g\_Lactobacillus\_s\_Lactobacillus\_salivarius  
PWY\_6122\_5\_aminimidazole\_ribonucleotide\_biosynthesis\_II\_g\_Lactobacillus\_s\_Lactobacillus\_salivarius  
PWY\_6277\_superpathway\_of\_5\_aminimidazole\_ribonucleotide\_biosynthesis\_g\_Lactobacillus\_s\_Lactobacillus\_salivarius  
PWY\_7013\_L\_1,2\_propanediol\_degradation  
PWY\_5173\_superpathway\_of\_acetyl\_CoA\_biosynthesis  
PWY\_6317\_galactose\_degradation\_I\_(Leloir\_pathway)\_g\_Lactobacillus\_s\_Lactobacillus\_salivarius  
PWY\_5686\_UMP\_biosynthesis\_g\_Lactobacillus\_s\_Lactobacillus\_vaginalis  
PWY\_7197\_pyrimidine\_deoxyribonucleotide\_phosphorylation\_g\_Lactobacillus\_s\_Lactobacillus\_salivarius  
PWY\_4041\_gamma\_glutamyl\_cycle  
COA\_PWY\_1\_coenzyme\_A\_biosynthesis\_II\_(mammalian)\_g\_Lactobacillus\_s\_Lactobacillus\_vaginalis  
PWY\_5138\_unsaturated\_even\_numbered\_fatty\_acid\_beta\_oxidation  
PWY\_922\_mevalonate\_pathway\_I\_g\_Lactobacillus\_s\_Lactobacillus\_vaginalis  
PWY\_7220\_adenosine\_deoxyribonucleotides\_de\_novo\_biosynthesis\_II\_g\_Lactobacillus\_s\_Lactobacillus\_salivarius  
PWY\_7222\_guanosine\_deoxyribonucleotides\_de\_novo\_biosynthesis\_II\_g\_Lactobacillus\_s\_Lactobacillus\_salivarius  
PWY0\_1241\_ADP\_L\_glycero\_beta\_D\_manno\_heptose\_biosynthesis  
PWY\_6122\_5\_aminimidazole\_ribonucleotide\_biosynthesis\_II\_g\_Escherichia\_s\_Escherichia\_coli  
PWY\_6277\_superpathway\_of\_5\_aminimidazole\_ribonucleotide\_biosynthesis\_g\_Escherichia\_s\_Escherichia\_coli

PWY\_7184\_\_pyrimidine\_deoxyribonucleotides\_de\_novo\_biosynthesis\_I\_g\_\_Lactobacillus\_s\_\_Lactobacillus

PWY\_5656\_\_mannosylglycerate\_biosynthesis\_I

PWY\_6545\_\_pyrimidine\_deoxyribonucleotides\_de\_novo\_biosynthesis\_III\_g\_\_Lactobacillus\_s\_\_Lactobacillus

KETOGLUCONMET\_PWY\_\_ketogluconate\_metabolism

PWY\_7210\_\_pyrimidine\_deoxyribonucleotides\_biosynthesis\_from\_CTP\_g\_\_Lactobacillus\_s\_\_Lactobacillus

COLANSYN\_PWY\_\_colanic\_acid\_building\_blocks\_biosynthesis\_g\_\_Escherichia\_s\_\_Escherichia\_coli

PWY\_7198\_\_pyrimidine\_deoxyribonucleotides\_de\_novo\_biosynthesis\_IV\_g\_\_Lactobacillus\_s\_\_Lactobacillus

PWY0\_166\_\_superpathway\_of\_pyrimidine\_deoxyribonucleotides\_de\_novo\_biosynthesis\_(E\_coli)

PWY66\_422\_\_D\_galactose\_degradation\_V\_(Leloir\_pathway)\_g\_\_Lactobacillus\_s\_\_Lactobacillus\_salivarius

PWY\_7197\_\_pyrimidine\_deoxyribonucleotide\_phosphorylation\_g\_\_Lactobacillus\_s\_\_Lactobacillus\_salivarius

PWY\_5083\_\_NAD\_NADH\_phosphorylation\_and\_dephosphorylation

PWY\_6125\_\_superpathway\_of\_guanosine\_nucleotides\_de\_novo\_biosynthesis\_II\_g\_\_Lactobacillus\_s\_\_Lactobacillus\_salivarius

GLYCOGENSYNTH\_PWY\_\_glycogen\_biosynthesis\_I\_(from\_ADP\_D\_Glucose)\_g\_\_Lactobacillus\_s\_\_Lactobacillus\_salivarius

PWY\_7228\_\_superpathway\_of\_guanosine\_nucleotides\_de\_novo\_biosynthesis\_I\_g\_\_Lactobacillus\_s\_\_Lactobacillus\_salivarius

GLUCARDEG\_PWY\_\_D\_glucarate\_degradation\_I\_g\_\_Escherichia\_s\_\_Escherichia\_coli

PWY\_5367\_\_petroselinate\_biosynthesis\_g\_\_Lactobacillus\_s\_\_Lactobacillus\_salivarius

PWY\_7221\_\_guanosine\_ribonucleotides\_de\_novo\_biosynthesis\_g\_\_Lactobacillus\_s\_\_Lactobacillus\_salivarius

PWY\_6859\_\_all\_trans\_farnesol\_biosynthesis

GLCMANNANAUT\_PWY\_\_superpathway\_of\_N\_acetylglucosamine,\_N\_acetylmannosamine\_and\_N\_acetylglucosamine

ARGDEG\_PWY\_\_superpathway\_of\_L\_arginine,\_putrescine,\_and\_4\_aminobutanoate\_degradation

ORNARGDEG\_PWY\_\_superpathway\_of\_L\_arginine\_and\_L\_ornithine\_degradation

UNINTEGRATED\_g\_\_Lactobacillus\_s\_\_Lactobacillus\_johnsonii

PWY\_5100\_\_pyruvate\_fermentation\_to\_acetate\_and\_lactate\_II\_g\_\_Lactobacillus\_s\_\_Lactobacillus\_salivarius

PWY\_3001\_\_superpathway\_of\_L\_isoleucine\_biosynthesis\_I\_g\_\_Escherichia\_s\_\_Escherichia\_coli

PWY\_2941\_\_L\_lysine\_biosynthesis\_II\_g\_\_Lactobacillus\_s\_\_Lactobacillus\_salivarius

PWY\_6629\_\_superpathway\_of\_L\_tryptophan\_biosynthesis

GLUCOSE1PMETAB\_PWY\_\_glucose\_and\_glucose\_1\_phosphate\_degradation

PWY\_7219\_\_adenosine\_ribonucleotides\_de\_novo\_biosynthesis\_g\_\_Lactobacillus\_s\_\_Lactobacillus\_salivarius

UNINTEGRATED\_g\_\_Lactobacillus\_s\_\_Lactobacillus\_helveticus

TCA\_GLYOX\_BYPASS\_\_superpathway\_of\_glyoxylate\_bypass\_and\_TCA

METHGLYUT\_PWY\_\_superpathway\_of\_methylglyoxal\_degradation

PWY\_7219\_\_adenosine\_ribonucleotides\_de\_novo\_biosynthesis\_g\_\_Lactobacillus\_s\_\_Lactobacillus\_salivarius

GLYOXYLATE\_BYPASS\_\_glyoxylate\_cycle

PWY\_5723\_\_Rubisco\_shunt

PWY\_5860\_\_superpathway\_of\_demethylmenaquinol\_6\_biosynthesis\_I

PWY\_5862\_\_superpathway\_of\_demethylmenaquinol\_9\_biosynthesis

POLYISOPRENSYN\_PWY\_\_polyisoprenoid\_biosynthesis\_(E\_coli)

BRANCHED\_CHAIN\_AA\_SYN\_PWY\_\_superpathway\_of\_branched\_amino\_acid\_biosynthesis\_g\_\_Escherichia\_s\_\_Escherichia\_coli

PWY\_7254\_\_TCA\_cycle\_VII\_(acetate\_producers)

UNINTEGRATED\_g\_\_Lactobacillus\_s\_\_Lactobacillus\_salivarius

GLUCARDEG\_PWY\_\_D\_glucarate\_degradation\_I

UBISYN\_PWY\_\_superpathway\_of\_ubiquinol\_8\_biosynthesis\_(prokaryotic)

PWY\_7279\_\_aerobic\_respiration\_II\_(cytochrome\_c\_(yeast))

PWY\_6121\_\_5\_aminoimidazole\_ribonucleotide\_biosynthesis\_I\_g\_\_Lactobacillus\_s\_\_Lactobacillus\_salivarius

PWY\_6803\_\_phosphatidylcholine\_acyl\_editing

PWY0\_1415\_\_superpathway\_of\_heme\_biosynthesis\_from\_uroporphyrinogen\_III

PWY\_5705\_\_allantoin\_degradation\_to\_glyoxylate\_III

PWY\_5845\_\_superpathway\_of\_menaquinol\_9\_biosynthesis  
PWY\_5850\_\_superpathway\_of\_menaquinol\_6\_biosynthesis\_I  
PWY\_5896\_\_superpathway\_of\_menaquinol\_10\_biosynthesis  
GALACTARDEG\_PWY\_\_D\_galactarate\_degradation\_I  
GLUCARGALACTSUPER\_PWY\_\_superpathway\_of\_D\_glucarate\_and\_D\_galactarate\_degradation  
PWY\_5384\_\_sucrose\_degradation\_IV\_(sucrose\_phosphorylase)  
PWY\_7228\_\_superpathway\_of\_guanosine\_nucleotides\_de\_novo\_biosynthesis\_I\_g\_\_Lactobacillus  
PWY\_5973\_\_cis\_vaccenate\_biosynthesis\_g\_\_Lactobacillus\_s\_\_Lactobacillus\_salivarius  
PWY\_6151\_\_S\_adenosyl\_L\_methionine\_cycle\_I\_g\_\_Lactobacillus\_s\_\_Lactobacillus\_johnsonii  
PWY\_5103\_\_L\_isoleucine\_biosynthesis\_III\_g\_\_Escherichia\_s\_\_Escherichia\_coli  
PWY\_6122\_\_5\_aminoimidazole\_ribonucleotide\_biosynthesis\_II\_g\_\_Lactobacillus\_s\_\_Lactobacillus  
PWY\_6277\_\_superpathway\_of\_5\_aminoimidazole\_ribonucleotide\_biosynthesis\_g\_\_Lactobacillus  
PWY\_922\_\_mevalonate\_pathway\_I  
PWY\_7219\_\_adenosine\_ribonucleotides\_de\_novo\_biosynthesis\_g\_\_Lactobacillus\_s\_\_Lactobacillus  
COA\_PWY\_1\_\_coenzyme\_A\_biosynthesis\_II\_(mammalian)\_g\_\_Lactobacillus\_s\_\_Lactobacillus\_johr  
PWY\_5861\_\_superpathway\_of\_demethylmenaquinol\_8\_biosynthesis  
PWY\_3781\_\_aerobic\_respiration\_I\_(cytochrome\_c)  
PWY\_5910\_\_superpathway\_of\_geranylgeranyldiphosphate\_biosynthesis\_I\_(via\_mevalonate)  
COA\_PWY\_\_coenzyme\_A\_biosynthesis\_I\_g\_\_Lactobacillus\_s\_\_Lactobacillus\_johnsonii  
GLYCOLYSIS\_TCA\_GLYOX\_BYPASS\_\_superpathway\_of\_glycolysis,\_pyruvate\_dehydrogenase,\_TCA,  
PWY\_5855\_\_ubiquinol\_7\_biosynthesis\_(prokaryotic)  
PWY\_5856\_\_ubiquinol\_9\_biosynthesis\_(prokaryotic)  
PWY\_5857\_\_ubiquinol\_10\_biosynthesis\_(prokaryotic)  
PWY\_6708\_\_ubiquinol\_8\_biosynthesis\_(prokaryotic)  
PWY\_7221\_\_guanosine\_ribonucleotides\_de\_novo\_biosynthesis\_g\_\_Lactobacillus\_s\_\_Lactobacillus  
PWY\_7208\_\_superpathway\_of\_pyrimidine\_nucleobases\_salvage\_g\_\_Lactobacillus\_s\_\_Lactobacillu  
PWY\_6386\_\_UDP\_N\_acetylmuramoyl\_pentapeptide\_biosynthesis\_II\_(lysine\_containing)\_g\_\_Lacto  
UDPNAGSYN\_PWY\_\_UDP\_N\_acetyl\_D\_glucosamine\_biosynthesis\_I\_g\_\_Lactobacillus\_s\_\_Lactobaci  
PWY\_5188\_\_tetrapyrrole\_biosynthesis\_I\_(from\_glutamate)\_g\_\_Lactobacillus\_s\_\_Lactobacillus\_reu  
PWY\_7323\_\_superpathway\_of\_GDP\_mannose\_derived\_O\_antigen\_building\_blocks\_biosynthesis\_  
PWY\_6387\_\_UDP\_N\_acetylmuramoyl\_pentapeptide\_biosynthesis\_I\_(meso\_diaminopimelate\_cont  
PWY\_5384\_\_sucrose\_degradation\_IV\_(sucrose\_phosphorylase)\_unclassified  
REDCITCYC\_TCA\_cycle\_VIII\_(helicobacter)  
P105\_PWY\_\_TCA\_cycle\_IV\_(2\_oxoglutarate\_decarboxylase)  
PWY\_5838\_\_superpathway\_of\_menaquinol\_8\_biosynthesis\_I  
PEPTIDOLYCANSYN\_PWY\_\_peptidoglycan\_biosynthesis\_I\_(meso\_diaminopimelate\_containing)\_g  
PWY\_7229\_\_superpathway\_of\_adenosine\_nucleotides\_de\_novo\_biosynthesis\_I\_g\_\_Lactobacillus  
PWY0\_1296\_\_purine\_ribonucleosides\_degradation\_g\_\_Lactobacillus\_s\_\_Lactobacillus\_reuteri  
PWY\_5686\_\_UMP\_biosynthesis\_g\_\_Lactobacillus\_s\_\_Lactobacillus\_reuteri  
PWY\_6147\_\_6\_hydroxymethyl\_dihydropterin\_diphosphate\_biosynthesis\_I\_g\_\_Lactobacillus\_s\_\_La  
PWY\_3841\_\_folate\_transformations\_II\_g\_\_Lactobacillus\_s\_\_Lactobacillus\_reuteri  
PWY\_6895\_\_superpathway\_of\_thiamin\_diphosphate\_biosynthesis\_II  
PWY\_6126\_\_superpathway\_of\_adenosine\_nucleotides\_de\_novo\_biosynthesis\_II\_g\_\_Lactobacillus  
PWY\_7357\_\_thiamin\_formation\_from\_pyriothiamine\_and\_oxythiamine\_(yeast)\_g\_\_Lactobacillus\_s  
UNINTEGRATED\_g\_\_Lactobacillus\_s\_\_Lactobacillus\_gasseri  
PWY\_7219\_\_adenosine\_ribonucleotides\_de\_novo\_biosynthesis\_g\_\_Lactobacillus\_s\_\_Lactobacillus  
PWY\_6859\_\_all\_trans\_farnesol\_biosynthesis\_g\_\_Lactobacillus\_s\_\_Lactobacillus\_reuteri



PWY\_2942\_\_L\_lysine\_biosynthesis\_III\_g\_\_Lactobacillus\_s\_\_Lactobacillus\_reuteri

PWY\_7219\_\_adenosine\_ribonucleotides\_de\_novo\_biosynthesis\_g\_\_Lactobacillus\_s\_\_Lactobacillus

PWY\_6892\_\_thiazole\_biosynthesis\_I\_(E\_coli)

COA\_PWY\_1\_\_coenzyme\_A\_biosynthesis\_II\_(mammalian)\_g\_\_Lactobacillus\_s\_\_Lactobacillus\_reut

PWY66\_422\_\_D\_galactose\_degradation\_V\_(Leloir\_pathway)\_g\_\_Lactobacillus\_s\_\_Lactobacillus\_re

PWY\_4242\_\_pantothenate\_and\_coenzyme\_A\_biosynthesis\_III\_g\_\_Lactobacillus\_s\_\_Lactobacillus

PWY\_7221\_\_guanosine\_ribonucleotides\_de\_novo\_biosynthesis\_g\_\_Lactobacillus\_s\_\_Lactobacillus

COA\_PWY\_\_coenzyme\_A\_biosynthesis\_I\_g\_\_Lactobacillus\_s\_\_Lactobacillus\_reuteri

PWY\_5791\_\_1,4\_dihydroxy\_2\_naphthoate\_biosynthesis\_II\_(plants)

PWY\_5837\_\_1,4\_dihydroxy\_2\_naphthoate\_biosynthesis\_I

UDPNAGSYN\_PWY\_\_UDP\_N\_acetyl\_D\_glucosamine\_biosynthesis\_I\_g\_\_Lactobacillus\_s\_\_Lactobaci

PWY\_841\_\_superpathway\_of\_purine\_nucleotides\_de\_novo\_biosynthesis\_I\_g\_\_Lactobacillus\_s\_\_L

UDPNAGSYN\_PWY\_\_UDP\_N\_acetyl\_D\_glucosamine\_biosynthesis\_I\_g\_\_Lactobacillus\_s\_\_Lactobaci

PWY\_6387\_\_UDP\_N\_acetylmuramoyl\_pentapeptide\_biosynthesis\_I\_(meso\_diaminopimelate\_cont

PWY\_7234\_\_inosine\_5\_\_phosphate\_biosynthesis\_III\_g\_\_Lactobacillus\_s\_\_Lactobacillus\_delbrueck

PWY\_6386\_\_UDP\_N\_acetylmuramoyl\_pentapeptide\_biosynthesis\_II\_(lysine\_containing)\_g\_\_Lacto

PWY\_4981\_\_L\_proline\_biosynthesis\_II\_(from\_arginine)\_g\_\_Lactobacillus\_s\_\_Lactobacillus\_reuteri

PWY\_2941\_\_L\_lysine\_biosynthesis\_II\_g\_\_Lactobacillus\_s\_\_Lactobacillus\_helveticus

PEPTIDOGLYCANSYN\_PWY\_\_peptidoglycan\_biosynthesis\_I\_(meso\_diaminopimelate\_containing)\_g

PWY\_6609\_\_adenine\_and\_adenosine\_salvage\_III\_g\_\_Lactobacillus\_s\_\_Lactobacillus\_reuteri

PWY\_6124\_\_inosine\_5\_\_phosphate\_biosynthesis\_II\_g\_\_Lactobacillus\_s\_\_Lactobacillus\_reuteri

PWY\_7234\_\_inosine\_5\_\_phosphate\_biosynthesis\_III\_g\_\_Lactobacillus\_s\_\_Lactobacillus\_reuteri

PWY\_5100\_\_pyruvate\_fermentation\_to\_acetate\_and\_lactate\_II\_g\_\_Lactobacillus\_s\_\_Lactobacillus

PWY\_2941\_\_L\_lysine\_biosynthesis\_II\_g\_\_Lactobacillus\_s\_\_Lactobacillus\_reuteri

PWY\_6125\_\_superpathway\_of\_guanosine\_nucleotides\_de\_novo\_biosynthesis\_II\_g\_\_Lactobacillus

PWY\_5097\_\_L\_lysine\_biosynthesis\_VI\_g\_\_Lactobacillus\_s\_\_Lactobacillus\_reuteri

PWY\_6123\_\_inosine\_5\_\_phosphate\_biosynthesis\_I\_g\_\_Lactobacillus\_s\_\_Lactobacillus\_reuteri

PWY\_7228\_\_superpathway\_of\_guanosine\_nucleotides\_de\_novo\_biosynthesis\_I\_g\_\_Lactobacillus

PWY\_7539\_\_6\_hydroxymethyl\_dihydropterin\_diphosphate\_biosynthesis\_III\_(Chlamydia)\_g\_\_Lacto

PWY\_7446\_\_sulfoglycolysis

PWY\_3841\_\_folate\_transformations\_II\_g\_\_Lactobacillus\_s\_\_Lactobacillus\_johnsonii

PWY\_7220\_\_adenosine\_deoxyribonucleotides\_de\_novo\_biosynthesis\_II\_g\_\_Lactobacillus\_s\_\_Lact

PWY\_7222\_\_guanosine\_deoxyribonucleotides\_de\_novo\_biosynthesis\_II\_g\_\_Lactobacillus\_s\_\_Lact

PWY\_6121\_\_5\_aminoimidazole\_ribonucleotide\_biosynthesis\_I\_g\_\_Lactobacillus\_s\_\_Lactobacillus

PWY\_6630\_\_superpathway\_of\_L\_tyrosine\_biosynthesis

PWY\_6317\_\_galactose\_degradation\_I\_(Leloir\_pathway)\_g\_\_Lactobacillus\_s\_\_Lactobacillus\_johnso

PWY66\_422\_\_D\_galactose\_degradation\_V\_(Leloir\_pathway)\_g\_\_Lactobacillus\_s\_\_Lactobacillus\_jo

PWY\_5667\_\_CDP\_diacylglycerol\_biosynthesis\_I\_g\_\_Lactobacillus\_s\_\_Lactobacillus\_reuteri

PWY0\_1319\_\_CDP\_diacylglycerol\_biosynthesis\_II\_g\_\_Lactobacillus\_s\_\_Lactobacillus\_reuteri

PWY\_3841\_\_folate\_transformations\_II\_g\_\_Lactobacillus\_s\_\_Lactobacillus\_gasseri

PWY\_6122\_\_5\_aminoimidazole\_ribonucleotide\_biosynthesis\_II\_g\_\_Lactobacillus\_s\_\_Lactobacillus

PWY\_6277\_\_superpathway\_of\_5\_aminoimidazole\_ribonucleotide\_biosynthesis\_g\_\_Lactobacillus

PWY\_7208\_\_superpathway\_of\_pyrimidine\_nucleobases\_salvage\_g\_\_Lactobacillus\_s\_\_Lactobacillu

PWY\_5913\_\_TCA\_cycle\_VI\_(obligate\_autotrophs)

PWY\_7197\_\_pyrimidine\_deoxyribonucleotide\_phosphorylation\_g\_\_Lactobacillus\_s\_\_Lactobacillus

UDPNAGSYN\_PWY\_\_UDP\_N\_acetyl\_D\_glucosamine\_biosynthesis\_I\_g\_\_Lactobacillus\_s\_\_Lactobaci

PWY\_7221\_\_guanosine\_ribonucleotides\_de\_novo\_biosynthesis\_g\_\_Lactobacillus\_s\_\_Lactobacillus

UDPNAGSYN\_PWY\_\_UDP\_N\_acetyl\_D\_glucosamine\_biosynthesis\_I\_g\_Lactobacillus\_s\_Lactobacillus  
PWY\_6123\_\_inosine\_5\_\_phosphate\_biosynthesis\_I\_g\_Lactobacillus\_s\_Lactobacillus\_delbrueckii  
UDPNAGSYN\_PWY\_\_UDP\_N\_acetyl\_D\_glucosamine\_biosynthesis\_I\_unclassified  
CALVIN\_PWY\_\_Calvin\_Benson\_Bassham\_cycle\_g\_Escherichia\_s\_Escherichia\_coli  
PWY\_6124\_\_inosine\_5\_\_phosphate\_biosynthesis\_II\_g\_Lactobacillus\_s\_Lactobacillus\_delbrueckii  
P163\_PWY\_\_L\_lysine\_fermentation\_to\_acetate\_and\_butanoate  
PWY\_7198\_\_pyrimidine\_deoxyribonucleotides\_de\_novo\_biosynthesis\_IV  
LACTOSECAT\_PWY\_\_lactose\_and\_galactose\_degradation\_I\_g\_Lactobacillus\_s\_Lactobacillus\_dell  
UDPNAGSYN\_PWY\_\_UDP\_N\_acetyl\_D\_glucosamine\_biosynthesis\_I\_g\_Lactobacillus\_s\_Lactobacillus  
FERMENTATION\_PWY\_\_mixed\_acid\_fermentation  
PWY\_5097\_\_L\_lysine\_biosynthesis\_VI\_g\_Lactobacillus\_s\_Lactobacillus\_crispatus  
PWY\_5920\_\_superpathway\_of\_heme\_biosynthesis\_from\_glycine  
PWY\_621\_\_sucrose\_degradation\_III\_(sucrose\_invertase)\_g\_Lactobacillus\_s\_Lactobacillus\_crispatus  
PWY\_2942\_\_L\_lysine\_biosynthesis\_III\_g\_Escherichia\_s\_Escherichia\_coli  
UNINTEGRATED\_g\_Lactobacillus\_s\_Lactobacillus\_delbrueckii  
PWY\_7221\_\_guanosine\_ribonucleotides\_de\_novo\_biosynthesis\_g\_Lactobacillus\_s\_Lactobacillus  
PWY\_5154\_\_L\_arginine\_biosynthesis\_III\_(via\_N\_acetyl\_L\_citrulline)\_g\_Escherichia\_s\_Escherichia\_coli  
PWY\_5097\_\_L\_lysine\_biosynthesis\_VI\_g\_Escherichia\_s\_Escherichia\_coli  
PWY\_7392\_\_taxadiene\_biosynthesis\_(engineered)  
PWY\_6121\_\_5\_aminimidazole\_ribonucleotide\_biosynthesis\_I\_g\_Lactobacillus\_s\_Lactobacillus  
PWY\_2942\_\_L\_lysine\_biosynthesis\_III\_g\_Lactobacillus\_s\_Lactobacillus\_crispatus  
PWY\_2941\_\_L\_lysine\_biosynthesis\_II\_g\_Lactobacillus\_s\_Lactobacillus\_crispatus  
PWY\_4981\_\_L\_proline\_biosynthesis\_II\_(from\_arginine)\_g\_Lactobacillus\_s\_Lactobacillus\_delbrueckii  
PWY\_6700\_\_queuosine\_biosynthesis\_g\_Sutterella\_s\_Sutterella\_wadsworthensis  
COA\_PWY\_1\_\_coenzyme\_A\_biosynthesis\_II\_(mammalian)\_g\_Lactobacillus\_s\_Lactobacillus\_crispatus  
UDPNAGSYN\_PWY\_\_UDP\_N\_acetyl\_D\_glucosamine\_biosynthesis\_I\_g\_Lactobacillus\_s\_Lactobacillus  
DAPLYSINESYN\_PWY\_\_L\_lysine\_biosynthesis\_I\_g\_Escherichia\_s\_Escherichia\_coli  
PWY\_7219\_\_adenosine\_ribonucleotides\_de\_novo\_biosynthesis\_g\_Lactobacillus\_s\_Lactobacillus  
PWY\_6122\_\_5\_aminimidazole\_ribonucleotide\_biosynthesis\_II\_g\_Lactobacillus\_s\_Lactobacillus  
PWY\_6277\_\_superpathway\_of\_5\_aminimidazole\_ribonucleotide\_biosynthesis\_g\_Lactobacillus\_s\_Lactobacillus  
PWY\_6151\_\_S\_adenosyl\_L\_methionine\_cycle\_I\_g\_Lactobacillus\_s\_Lactobacillus\_crispatus  
PWY\_7117\_\_C4\_photosynthetic\_carbon\_assimilation\_cycle,\_PEPCK\_type  
PWY\_7219\_\_adenosine\_ribonucleotides\_de\_novo\_biosynthesis\_g\_Lactobacillus\_s\_Lactobacillus  
PWY\_5973\_\_cis\_vaccenate\_biosynthesis\_g\_Lactobacillus\_s\_Lactobacillus\_delbrueckii  
PWY\_7219\_\_adenosine\_ribonucleotides\_de\_novo\_biosynthesis\_g\_Lactobacillus\_s\_Lactobacillus  
PWY\_7663\_\_gondoate\_biosynthesis\_(anaerobic)\_g\_Lactobacillus\_s\_Lactobacillus\_delbrueckii  
PWY0\_1061\_\_superpathway\_of\_L\_alanine\_biosynthesis  
PWY\_7210\_\_pyrimidine\_deoxyribonucleotides\_biosynthesis\_from\_CTP  
GLYCOCAT\_PWY\_\_glycogen\_degradation\_I\_(bacterial)  
P161\_PWY\_\_acetylene\_degradation  
ARG+POLYAMINE\_SYN\_\_superpathway\_of\_arginine\_and\_polyamine\_biosynthesis\_g\_Escherichia\_coli  
UNINTEGRATED\_g\_Lactobacillus\_s\_Lactobacillus\_crispatus  
P4\_PWY\_\_superpathway\_of\_L\_lysine,\_L\_threonine\_and\_L\_methionine\_biosynthesis\_I\_g\_Escherichia\_coli  
COA\_PWY\_1\_\_coenzyme\_A\_biosynthesis\_II\_(mammalian)\_g\_Lactobacillus\_s\_Lactobacillus\_helveticus  
ARGSYNBSUB\_PWY\_\_L\_arginine\_biosynthesis\_II\_(acetyl\_cycle)\_g\_Escherichia\_s\_Escherichia\_coli  
PWY\_5863\_\_superpathway\_of\_phylloquinol\_biosynthesis  
COA\_PWY\_1\_\_coenzyme\_A\_biosynthesis\_II\_(mammalian)\_g\_Lactobacillus\_s\_Lactobacillus\_brevianus

PWY\_724\_\_superpathway\_of\_L\_lysine\_L\_threonine\_and\_L\_methionine\_biosynthesis\_II\_g\_Esche  
HEME\_BIOSYNTHESIS\_II\_\_heme\_biosynthesis\_I\_(aerobic)  
PWY0\_862\_\_(5Z)\_dodec\_5\_enoate\_biosynthesis  
NAGLIPASYN\_PWY\_\_lipid\_IVA\_biosynthesis  
PWY\_7400\_\_L\_arginine\_biosynthesis\_IV\_(archaeobacteria)\_g\_Escherichia\_s\_Escherichia\_coli  
PWY\_6151\_\_S\_adenosyl\_L\_methionine\_cycle\_I\_g\_Lactobacillus\_s\_Lactobacillus\_acidophilus  
PWY\_5897\_\_superpathway\_of\_menaquinol\_11\_biosynthesis  
PWY\_5898\_\_superpathway\_of\_menaquinol\_12\_biosynthesis  
PWY\_5899\_\_superpathway\_of\_menaquinol\_13\_biosynthesis  
UNINTEGRATED\_g\_Lactobacillus\_s\_Lactobacillus\_brevis  
UDPNAGSYN\_PWY\_\_UDP\_N\_acetyl\_D\_glucosamine\_biosynthesis\_I\_g\_Lactobacillus\_s\_Lactobaci  
PWY\_7388\_\_octanoyl\_[acyl\_carrier\_protein]\_biosynthesis\_(mitochondria,\_yeast)  
PWY\_7328\_\_superpathway\_of\_UDP\_glucose\_derived\_O\_antigen\_building\_blocks\_biosynthesis  
PWY\_5723\_\_Rubisco\_shunt\_g\_Escherichia\_s\_Escherichia\_coli  
PWY\_6168\_\_flavin\_biosynthesis\_III\_(fungi)\_g\_Escherichia\_s\_Escherichia\_coli  
PWY\_6703\_\_preQ0\_biosynthesis\_g\_Megasphaera\_s\_Megasphaera\_micronuciformis  
PWY\_7664\_\_oleate\_biosynthesis\_IV\_(anaerobic)  
HEMESYN2\_PWY\_\_heme\_biosynthesis\_II\_(anaerobic)  
NONOXIPENT\_PWY\_\_pentose\_phosphate\_pathway\_(non\_oxidative\_branch)\_g\_Escherichia\_s\_E  
FASYN\_INITIAL\_PWY\_\_superpathway\_of\_fatty\_acid\_biosynthesis\_initiation\_(E\_coli)  
PWY\_7219\_\_adenosine\_ribonucleotides\_de\_novo\_biosynthesis\_g\_Lactobacillus\_s\_Lactobacillus  
FASYN\_ELONG\_PWY\_\_fatty\_acid\_elongation\_\_\_\_saturated  
PWY\_5097\_\_L\_lysine\_biosynthesis\_VI\_g\_Lactobacillus\_s\_Lactobacillus\_acidophilus  
NONOXIPENT\_PWY\_\_pentose\_phosphate\_pathway\_(non\_oxidative\_branch)\_g\_Lactobacillus\_s  
UDPNAGSYN\_PWY\_\_UDP\_N\_acetyl\_D\_glucosamine\_biosynthesis\_I\_g\_Lactobacillus\_s\_Lactobaci  
PWY\_7446\_\_sulfolglycolysis\_g\_Escherichia\_s\_Escherichia\_coli  
COA\_PWY\_\_coenzyme\_A\_biosynthesis\_I\_g\_Lactobacillus\_s\_Lactobacillus\_brevis  
PWY\_4242\_\_pantothenate\_and\_coenzyme\_A\_biosynthesis\_III\_g\_Megasphaera\_s\_Megasphaera  
PWY\_7199\_\_pyrimidine\_deoxyribonucleosides\_salvage\_g\_Escherichia\_s\_Escherichia\_coli  
PWY\_2942\_\_L\_lysine\_biosynthesis\_III\_g\_Megasphaera\_s\_Megasphaera\_micronuciformis  
PWY\_7184\_\_pyrimidine\_deoxyribonucleotides\_de\_novo\_biosynthesis\_I\_g\_Sutterella\_s\_Suttere  
UNINTEGRATED\_g\_Lactobacillus\_s\_Lactobacillus\_acidophilus  
PWY\_7198\_\_pyrimidine\_deoxyribonucleotides\_de\_novo\_biosynthesis\_IV\_unclassified  
PWY\_6122\_\_5\_aminoimidazole\_ribonucleotide\_biosynthesis\_II\_g\_Megasphaera\_s\_Megasphaer  
PWY\_6277\_\_superpathway\_of\_5\_aminoimidazole\_ribonucleotide\_biosynthesis\_g\_Megasphaera  
HEMESYN2\_PWY\_\_heme\_biosynthesis\_II\_(anaerobic)\_g\_Sutterella\_s\_Sutterella\_wadsworthensi  
PWY\_5097\_\_L\_lysine\_biosynthesis\_VI\_g\_Megasphaera\_s\_Megasphaera\_micronuciformis  
PWY0\_1296\_\_purine\_ribonucleosides\_degradation\_g\_Lactobacillus\_s\_Lactobacillus\_brevis  
ENTBACSYN\_PWY\_\_enterobactin\_biosynthesis  
PWY\_6897\_\_thiamin\_salvage\_II\_g\_Megasphaera\_s\_Megasphaera\_micronuciformis  
PWY\_6147\_\_6\_hydroxymethyl\_dihydropterin\_diphosphate\_biosynthesis\_I\_g\_Megasphaera\_s\_M  
COA\_PWY\_1\_\_coenzyme\_A\_biosynthesis\_II\_(mammalian)\_g\_Megasphaera\_s\_Megasphaera\_m  
PWY0\_166\_\_superpathway\_of\_pyrimidine\_deoxyribonucleotides\_de\_novo\_biosynthesis\_(E\_coli)  
PEPTIDOLYCANSYN\_PWY\_\_peptidoglycan\_biosynthesis\_I\_(meso\_diaminopimelate\_containing)\_g  
PWY\_6317\_\_galactose\_degradation\_I\_(Leloir\_pathway)\_g\_Lactobacillus\_s\_Lactobacillus\_acidop  
PWY66\_422\_\_D\_galactose\_degradation\_V\_(Leloir\_pathway)\_g\_Lactobacillus\_s\_Lactobacillus\_ac  
PWY\_6121\_\_5\_aminoimidazole\_ribonucleotide\_biosynthesis\_I\_g\_Megasphaera\_s\_Megasphaer

PWY\_6282\_\_palmitoleate\_biosynthesis\_I\_(from\_(5Z)\_dodec\_5\_enoate)

PWY\_6386\_\_UDP\_N\_acetylmuramoyl\_pentapeptide\_biosynthesis\_II\_(lysine\_containing)\_g\_Mega

PWY\_5384\_\_sucrose\_degradation\_IV\_(sucrose\_phosphorylase)\_g\_Lactobacillus\_s\_Lactobacillus

PWY\_6387\_\_UDP\_N\_acetylmuramoyl\_pentapeptide\_biosynthesis\_I\_(meso\_diaminopimelate\_containing)

PWY\_7221\_\_guanosine\_ribonucleotides\_de\_novo\_biosynthesis\_g\_Lactobacillus\_s\_Lactobacillus

PWY\_6386\_\_UDP\_N\_acetylmuramoyl\_pentapeptide\_biosynthesis\_II\_(lysine\_containing)\_g\_Lacto

PWY\_7357\_\_thiamin\_formation\_from\_pyriothiamine\_and\_oxythiamine\_(yeast)\_g\_Megasphaera\_s

THISYN\_PWY\_\_superpathway\_of\_thiamin\_diphosphate\_biosynthesis\_I

PWY\_621\_\_sucrose\_degradation\_III\_(sucrose\_invertase)\_g\_Lactobacillus\_s\_Lactobacillus\_acidophilus

PWY\_6385\_\_peptidoglycan\_biosynthesis\_III\_(mycobacteria)\_g\_Megasphaera\_s\_Megasphaera\_micronuciformis

PWY\_7539\_\_6\_hydroxymethyl\_dihydropterin\_diphosphate\_biosynthesis\_III\_(Chlamydia)\_g\_Escherichia\_s

PWY\_6387\_\_UDP\_N\_acetylmuramoyl\_pentapeptide\_biosynthesis\_I\_(meso\_diaminopimelate\_containing)

ANAEROFRUCAT\_PWY\_\_homolactic\_fermentation\_g\_Escherichia\_s\_Escherichia\_coli

PWY\_724\_\_superpathway\_of\_L\_lysine,\_L\_threonine\_and\_L\_methionine\_biosynthesis\_II\_g\_Lactobacillus\_s

PWY\_5686\_\_UMP\_biosynthesis\_g\_Megasphaera\_s\_Megasphaera\_micronuciformis

PWY\_561\_\_superpathway\_of\_glyoxylate\_cycle\_and\_fatty\_acid\_degradation

PWY4FS\_7\_\_phosphatidylglycerol\_biosynthesis\_I\_(plastidic)

PWY4FS\_8\_\_phosphatidylglycerol\_biosynthesis\_II\_(non\_plastidic)

PWY\_6519\_\_8\_amino\_7\_oxononanoate\_biosynthesis\_I

PWY\_5667\_\_CDP\_diacylglycerol\_biosynthesis\_I\_g\_Megasphaera\_s\_Megasphaera\_micronuciformis

PWY0\_1319\_\_CDP\_diacylglycerol\_biosynthesis\_II\_g\_Megasphaera\_s\_Megasphaera\_micronuciformis

PWY\_6121\_\_5\_aminoimidazole\_ribonucleotide\_biosynthesis\_I\_g\_Lactobacillus\_s\_Lactobacillus

VALSYN\_PWY\_\_L\_valine\_biosynthesis\_g\_Megasphaera\_s\_Megasphaera\_micronuciformis

UNINTEGRATED\_g\_Megasphaera\_s\_Megasphaera\_micronuciformis

PEPTIDOGLYCANSYN\_PWY\_\_peptidoglycan\_biosynthesis\_I\_(meso\_diaminopimelate\_containing)\_g

PWY\_5918\_\_superpathway\_of\_heme\_biosynthesis\_from\_glutamate

PWY\_7210\_\_pyrimidine\_deoxyribonucleotides\_biosynthesis\_from\_CTP\_unclassified

PWY\_5695\_\_urate\_biosynthesis\_inosine\_5\_phosphate\_degradation\_g\_Megasphaera\_s\_Megasphaera\_micronuciformis

PWY\_6386\_\_UDP\_N\_acetylmuramoyl\_pentapeptide\_biosynthesis\_II\_(lysine\_containing)\_g\_Lactobacillus\_s

PWY\_6387\_\_UDP\_N\_acetylmuramoyl\_pentapeptide\_biosynthesis\_I\_(meso\_diaminopimelate\_containing)

PWY\_3841\_\_folate\_transformations\_II\_g\_Lactobacillus\_s\_Lactobacillus\_acidophilus

PWY\_5971\_\_palmitate\_biosynthesis\_II\_(bacteria\_and\_plants)

PWY\_6151\_\_S\_adenosyl\_L\_methionine\_cycle\_I\_g\_Lactobacillus\_s\_Lactobacillus\_brevis

NONOXIPENT\_PWY\_\_pentose\_phosphate\_pathway\_(non\_oxidative\_branch)\_g\_Lactobacillus\_s\_Lactobacillus

PWY\_5100\_\_pyruvate\_fermentation\_to\_acetate\_and\_lactate\_II\_g\_Lactobacillus\_s\_Lactobacillus

PWY\_2942\_\_L\_lysine\_biosynthesis\_III\_g\_Lactobacillus\_s\_Lactobacillus\_acidophilus

PWY\_6608\_\_guanosine\_nucleotides\_degradation\_III\_g\_Megasphaera\_s\_Megasphaera\_micronuciformis

PWY\_2941\_\_L\_lysine\_biosynthesis\_II\_g\_Lactobacillus\_s\_Lactobacillus\_acidophilus

P125\_PWY\_\_superpathway\_of\_(R,R)\_butanediol\_biosynthesis

PWY\_6163\_\_chorismate\_biosynthesis\_from\_3\_dehydroquinate\_g\_Megasphaera\_s\_Megasphaera\_micronuciformis

PWY\_5840\_\_superpathway\_of\_menaquinol\_7\_biosynthesis

COA\_PWY\_1\_\_coenzyme\_A\_biosynthesis\_II\_(mammalian)\_g\_Lactobacillus\_s\_Lactobacillus\_acidophilus

PWY\_7229\_\_superpathway\_of\_adenosine\_nucleotides\_de\_novo\_biosynthesis\_I\_g\_Sutterella\_s

PEPTIDOGLYCANSYN\_PWY\_\_peptidoglycan\_biosynthesis\_I\_(meso\_diaminopimelate\_containing)\_g

PWY\_7221\_\_guanosine\_ribonucleotides\_de\_novo\_biosynthesis\_g\_Megasphaera\_s\_Megasphaera\_micronuciformis

PWY\_6126\_\_superpathway\_of\_adenosine\_nucleotides\_de\_novo\_biosynthesis\_II\_g\_Sutterella\_s

PWY\_7234\_\_inosine\_5\_phosphate\_biosynthesis\_III\_g\_Lactobacillus\_s\_Lactobacillus\_acidophilus

COA\_PWY\_\_coenzyme\_A\_biosynthesis\_I\_g\_\_Megasphaera\_s\_\_Megasphaera\_micronuciformis

PWY\_6122\_\_5\_aminimidazole\_ribonucleotide\_biosynthesis\_II\_g\_\_Lactobacillus\_s\_\_Lactobacillus

PWY\_6277\_\_superpathway\_of\_5\_aminimidazole\_ribonucleotide\_biosynthesis\_g\_\_Lactobacillus\_s\_\_Lactobacillus

BIOTIN\_BIOSYNTHESIS\_PWY\_\_biotin\_biosynthesis\_I

PWY\_5188\_\_tetrapyrrole\_biosynthesis\_I\_(from\_glutamate)\_g\_\_Sutterella\_s\_\_Sutterella\_wadsworthii

P122\_PWY\_\_heterolactic\_fermentation

PWY\_7219\_\_adenosine\_ribonucleotides\_de\_novo\_biosynthesis\_g\_\_Megasphaera\_s\_\_Megasphaera\_micronuciformis

FUC\_RHAMCAT\_PWY\_\_superpathway\_of\_fucose\_and\_rhamnose\_degradation

PWY\_7111\_\_pyruvate\_fermentation\_to\_isobutanol\_(engineered)\_g\_\_Megasphaera\_s\_\_Megasphaera\_micronuciformis

PWY\_7208\_\_superpathway\_of\_pyrimidine\_nucleobases\_salvage\_g\_\_Sutterella\_s\_\_Sutterella\_wadsworthii

OANTIGEN\_PWY\_\_O\_antigen\_building\_blocks\_biosynthesis\_(E\_coli)\_unclassified

PWY\_7197\_\_pyrimidine\_deoxyribonucleotide\_phosphorylation\_g\_\_Escherichia\_s\_\_Escherichia\_coli

PWY\_6123\_\_inosine\_5\_phosphate\_biosynthesis\_I\_g\_\_Lactobacillus\_s\_\_Lactobacillus\_acidophilus

PWY66\_400\_\_glycolysis\_VI\_(metazoan)

PWY0\_1296\_\_purine\_ribonucleosides\_degradation\_g\_\_Megasphaera\_s\_\_Megasphaera\_micronuciformis

GLYCOLYSIS\_\_glycolysis\_I\_(from\_glucose\_6\_phosphate)

PWY\_6285\_\_superpathway\_of\_fatty\_acids\_biosynthesis\_(E\_coli)

PWY0\_41\_\_allantoin\_degradation\_IV\_(anaerobic)

PWY\_6124\_\_inosine\_5\_phosphate\_biosynthesis\_II\_g\_\_Lactobacillus\_s\_\_Lactobacillus\_acidophilus

TEICHOICACID\_PWY\_\_teichoic\_acid\_(poly\_glycerol)\_biosynthesis

DTDPRHAMSYN\_PWY\_\_dTDP\_L\_rhamnose\_biosynthesis\_I\_g\_\_Escherichia\_s\_\_Escherichia\_coli

THRESYN\_PWY\_\_superpathway\_of\_L\_threonine\_biosynthesis\_g\_\_Lactobacillus\_s\_\_Lactobacillus\_acidophilus

NAD\_BIOSYNTHESIS\_II\_\_NAD\_salvage\_pathway\_II

PWY\_6628\_\_superpathway\_of\_L\_phenylalanine\_biosynthesis

PWY\_5484\_\_glycolysis\_II\_(from\_fructose\_6\_phosphate)

GLUTORN\_PWY\_\_L\_ornithine\_biosynthesis

PWY66\_389\_\_phytol\_degradation

PHOSLIPSYN\_PWY\_\_superpathway\_of\_phospholipid\_biosynthesis\_I\_(bacteria)

UDPNAGSYN\_PWY\_\_UDP\_N\_acetyl\_D\_glucosamine\_biosynthesis\_I

PWYG\_321\_\_mycolate\_biosynthesis

PWY66\_409\_\_superpathway\_of\_purine\_nucleotide\_salvage\_g\_\_Escherichia\_s\_\_Escherichia\_coli

PWY\_7220\_\_adenosine\_deoxyribonucleotides\_de\_novo\_biosynthesis\_II\_g\_\_Sutterella\_s\_\_Sutterella\_wadsworthii

PWY\_7222\_\_guanosine\_deoxyribonucleotides\_de\_novo\_biosynthesis\_II\_g\_\_Sutterella\_s\_\_Sutterella\_wadsworthii

PWY0\_321\_\_phenylacetate\_degradation\_I\_(aerobic)

SO4ASSIM\_PWY\_\_sulfate\_reduction\_I\_(assimilatory)

ORNDEG\_PWY\_\_superpathway\_of\_ornithine\_degradation\_unclassified

PWY\_7219\_\_adenosine\_ribonucleotides\_de\_novo\_biosynthesis\_g\_\_Sutterella\_s\_\_Sutterella\_wadsworthii

PEPTIDOLYCANSYN\_PWY\_\_peptidoglycan\_biosynthesis\_I\_(meso\_diaminopimelate\_containing)\_g\_\_Sutterella\_s\_\_Sutterella\_wadsworthii

PWY\_6387\_\_UDP\_N\_acetylmuramoyl\_pentapeptide\_biosynthesis\_I\_(meso\_diaminopimelate\_containing)\_g\_\_Sutterella\_s\_\_Sutterella\_wadsworthii

NAGLIPASYN\_PWY\_\_lipid\_IVA\_biosynthesis\_g\_\_Sutterella\_s\_\_Sutterella\_wadsworthii

PWY0\_166\_\_superpathway\_of\_pyrimidine\_deoxyribonucleotides\_de\_novo\_biosynthesis\_(E\_coli)

GOLPDLICAT\_PWY\_\_superpathway\_of\_glycerol\_degradation\_to\_1,3\_propanediol

LACTOSECAT\_PWY\_\_lactose\_and\_galactose\_degradation\_I\_unclassified

PWY\_841\_\_superpathway\_of\_purine\_nucleotides\_de\_novo\_biosynthesis\_I\_g\_\_Escherichia\_s\_\_Escherichia\_coli

ARGSYNBSUB\_PWY\_\_L\_arginine\_biosynthesis\_II\_(acetyl\_cycle)

PWY\_6386\_\_UDP\_N\_acetylmuramoyl\_pentapeptide\_biosynthesis\_II\_(lysine\_containing)\_g\_\_Sutterella\_s\_\_Sutterella\_wadsworthii

METSYN\_PWY\_\_L\_homoserine\_and\_L\_methionine\_biosynthesis\_g\_\_Lactobacillus\_s\_\_Lactobacillus\_acidophilus

PWY\_6124\_\_inosine\_5\_\_phosphate\_biosynthesis\_II\_g\_\_Lactobacillus\_s\_\_Lactobacillus\_salivarius  
GLCMANNANAUT\_PWY\_\_superpathway\_of\_N\_acetylglucosamine,\_N\_acetylmannosamine\_and\_N  
P441\_PWY\_\_superpathway\_of\_N\_acetylneuraminate\_degradation  
UNINTEGRATED\_g\_\_Sutterella\_s\_\_Sutterella\_wadsworthensis  
HEXITOLDEGSUPER\_PWY\_\_superpathway\_of\_hexitol\_degradation\_(bacteria)  
PWY\_6125\_\_superpathway\_of\_guanosine\_nucleotides\_de\_novo\_biosynthesis\_II\_g\_\_Escherichia\_s  
PWY\_6901\_\_superpathway\_of\_glucose\_and\_xylose\_degradation\_g\_\_Escherichia\_s\_\_Escherichia\_c  
PWY\_6121\_\_5\_aminoimidazole\_ribonucleotide\_biosynthesis\_I\_g\_\_Sutterella\_s\_\_Sutterella\_wads  
PWY\_7184\_\_pyrimidine\_deoxyribonucleotides\_de\_novo\_biosynthesis\_I\_g\_\_Escherichia\_s\_\_Esche  
PWY\_6122\_\_5\_aminoimidazole\_ribonucleotide\_biosynthesis\_II\_g\_\_Sutterella\_s\_\_Sutterella\_wads  
PWY\_6277\_\_superpathway\_of\_5\_aminoimidazole\_ribonucleotide\_biosynthesis\_g\_\_Sutterella\_s\_\_  
PWY\_7220\_\_adenosine\_deoxyribonucleotides\_de\_novo\_biosynthesis\_II\_g\_\_Escherichia\_s\_\_Esche  
PWY\_7222\_\_guanosine\_deoxyribonucleotides\_de\_novo\_biosynthesis\_II\_g\_\_Escherichia\_s\_\_Esche  
PWY0\_1297\_\_superpathway\_of\_purine\_deoxyribonucleosides\_degradation  
PWY\_6125\_\_superpathway\_of\_guanosine\_nucleotides\_de\_novo\_biosynthesis\_II\_g\_\_Sutterella\_s\_\_  
PWY\_7229\_\_superpathway\_of\_adenosine\_nucleotides\_de\_novo\_biosynthesis\_I\_g\_\_Escherichia\_s\_\_  
PWY\_7228\_\_superpathway\_of\_guanosine\_nucleotides\_de\_novo\_biosynthesis\_I\_g\_\_Sutterella\_s\_\_  
PWY\_7228\_\_superpathway\_of\_guanosine\_nucleotides\_de\_novo\_biosynthesis\_I\_g\_\_Escherichia\_s\_\_  
PWY\_6628\_\_superpathway\_of\_L\_phenylalanine\_biosynthesis\_unclassified  
P23\_PWY\_\_reductive\_TCA\_cycle\_I  
PWY\_6284\_\_superpathway\_of\_unsaturated\_fatty\_acids\_biosynthesis\_(E\_coli)  
PWY0\_162\_\_superpathway\_of\_pyrimidine\_ribonucleotides\_de\_novo\_biosynthesis\_g\_\_Escherichia  
PWY\_7204\_\_pyridoxal\_5\_\_phosphate\_salvage\_II\_(plants)  
GLYCOLYSIS\_E\_D\_\_superpathway\_of\_glycolysis\_and\_Entner\_Doudoroff  
PWY\_6595\_\_superpathway\_of\_guanosine\_nucleotides\_degradation\_(plants)  
PWY\_6936\_\_seleno\_amino\_acid\_biosynthesis\_g\_\_Lactobacillus\_s\_\_Lactobacillus\_salivarius  
PWY0\_1298\_\_superpathway\_of\_pyrimidine\_deoxyribonucleosides\_degradation  
PWY\_3781\_\_aerobic\_respiration\_I\_(cytochrome\_c)\_unclassified  
HEMESYN2\_PWY\_\_heme\_biosynthesis\_II\_(anaerobic)\_unclassified  
PWY\_5083\_\_NAD\_NADH\_phosphorylation\_and\_dephosphorylation\_unclassified  
PWY\_6122\_\_5\_aminoimidazole\_ribonucleotide\_biosynthesis\_II\_g\_\_Rothia\_s\_\_Rothia\_mucilaginos  
PWY\_6277\_\_superpathway\_of\_5\_aminoimidazole\_ribonucleotide\_biosynthesis\_g\_\_Rothia\_s\_\_Rot  
PWY\_6126\_\_superpathway\_of\_adenosine\_nucleotides\_de\_novo\_biosynthesis\_II\_g\_\_Escherichia\_s  
SULFATE\_CYS\_PWY\_\_superpathway\_of\_sulfate\_assimilation\_and\_cysteine\_biosynthesis  
PWY\_7197\_\_pyrimidine\_deoxyribonucleotide\_phosphorylation  
PWY\_7221\_\_guanosine\_ribonucleotides\_de\_novo\_biosynthesis\_g\_\_Sutterella\_s\_\_Sutterella\_wads  
PWY66\_409\_\_superpathway\_of\_purine\_nucleotide\_salvage  
HOMOSER\_METSYN\_PWY\_\_L\_methionine\_biosynthesis\_I\_g\_\_Lactobacillus\_s\_\_Lactobacillus\_vagir  
PWY\_7184\_\_pyrimidine\_deoxyribonucleotides\_de\_novo\_biosynthesis\_I  
ANAEROFRUCAT\_PWY\_\_homolactic\_fermentation  
PWY\_7208\_\_superpathway\_of\_pyrimidine\_nucleobases\_salvage\_g\_\_Escherichia\_s\_\_Escherichia\_c  
PWY\_7208\_\_superpathway\_of\_pyrimidine\_nucleobases\_salvage  
PWY\_5675\_\_nitrate\_reduction\_V\_(assimilatory)  
PWY\_7228\_\_superpathway\_of\_guanosine\_nucleotides\_de\_novo\_biosynthesis\_I  
PWY0\_1261\_\_anhydromuropeptides\_recycling  
PWY\_6125\_\_superpathway\_of\_guanosine\_nucleotides\_de\_novo\_biosynthesis\_II  
PWY\_7220\_\_adenosine\_deoxyribonucleotides\_de\_novo\_biosynthesis\_II

PWY\_7222\_\_guanosine\_deoxyribonucleotides\_de\_novo\_biosynthesis\_II  
 PWY4FS\_7\_\_phosphatidylglycerol\_biosynthesis\_I\_(plastidic)\_unclassified  
 PWY4FS\_8\_\_phosphatidylglycerol\_biosynthesis\_II\_(non\_plastidic)\_unclassified  
 PWY\_6901\_\_superpathway\_of\_glucose\_and\_xylose\_degradation  
 PENTOSE\_P\_PWY\_\_pentose\_phosphate\_pathway\_g\_\_Escherichia\_s\_\_Escherichia\_coli  
 PWY\_6803\_\_phosphatidylcholine\_acyl\_editing\_unclassified  
 PWY\_2941\_\_L\_lysine\_biosynthesis\_II  
 PWY\_6606\_\_guanosine\_nucleotides\_degradation\_II  
 COA\_PWY\_1\_\_coenzyme\_A\_biosynthesis\_II\_(mammalian)\_g\_\_Sutterella\_s\_\_Sutterella\_wadsworthii  
 GLUCONEO\_PWY\_\_gluconeogenesis\_I  
 PWY\_5189\_\_tetrapyrrole\_biosynthesis\_II\_(from\_glycine)  
 PWY66\_409\_\_superpathway\_of\_purine\_nucleotide\_salvage\_unclassified  
 PWY\_7234\_\_inosine\_5\_\_phosphate\_biosynthesis\_III  
 P185\_PWY\_\_formaldehyde\_assimilation\_III\_(dihydroxyacetone\_cycle)  
 PWY\_5941\_\_glycogen\_degradation\_II\_(eukaryotic)  
 GLUCARDEG\_PWY\_\_D\_glucarate\_degradation\_I\_unclassified  
 PWY\_5005\_\_biotin\_biosynthesis\_II  
 PWY\_5154\_\_L\_arginine\_biosynthesis\_III\_(via\_N\_acetyl\_L\_citrulline)  
 PWY0\_166\_\_superpathway\_of\_pyrimidine\_deoxyribonucleotides\_de\_novo\_biosynthesis\_(E\_coli)  
 GALACTARDEG\_PWY\_\_D\_galactarate\_degradation\_I\_unclassified  
 GLUCARGALACTSUPER\_PWY\_\_superpathway\_of\_D\_glucarate\_and\_D\_galactarate\_degradation\_unclassified  
 PWY\_6936\_\_seleno\_amino\_acid\_biosynthesis  
 PWY\_6126\_\_superpathway\_of\_adenosine\_nucleotides\_de\_novo\_biosynthesis\_II  
 PWY\_7560\_\_methylerythritol\_phosphate\_pathway\_II  
 PWY\_5121\_\_superpathway\_of\_geranylgeranyl\_diphosphate\_biosynthesis\_II\_(via\_MEP)  
 PWY\_922\_\_mevalonate\_pathway\_I\_unclassified  
 PWY\_7663\_\_gondoate\_biosynthesis\_(anaerobic)  
 PWY\_3841\_\_folate\_transformations\_II\_unclassified  
 PWY\_841\_\_superpathway\_of\_purine\_nucleotides\_de\_novo\_biosynthesis\_I  
 DAPLYSINESYN\_PWY\_\_L\_lysine\_biosynthesis\_I  
 PWY\_6897\_\_thiamin\_salvage\_II\_unclassified  
 PWY\_7229\_\_superpathway\_of\_adenosine\_nucleotides\_de\_novo\_biosynthesis\_I  
 GLUTORN\_PWY\_\_L\_ornithine\_biosynthesis\_unclassified  
 PWY\_6387\_\_UDP\_N\_acetylmuramoyl\_pentapeptide\_biosynthesis\_I\_(meso\_diaminopimelate\_containing)  
 ARGSYNBSUB\_PWY\_\_L\_arginine\_biosynthesis\_II\_(acetyl\_cycle)\_unclassified  
 PWY\_7388\_\_octanoyl\_[acyl\_carrier\_protein]\_biosynthesis\_(mitochondria,\_yeast)\_unclassified  
 PHOSLIPSYN\_PWY\_\_superpathway\_of\_phospholipid\_biosynthesis\_I\_(bacteria)\_unclassified  
 FASYN\_INITIAL\_PWY\_\_superpathway\_of\_fatty\_acid\_biosynthesis\_initiation\_(E\_coli)\_unclassified  
 PWY\_5791\_\_1,4\_dihydroxy\_2\_naphthoate\_biosynthesis\_II\_(plants)\_unclassified  
 PWY\_5837\_\_1,4\_dihydroxy\_2\_naphthoate\_biosynthesis\_I\_unclassified  
 PWY0\_862\_\_(5Z)\_dodec\_5\_enoate\_biosynthesis\_unclassified  
 PWY\_5100\_\_pyruvate\_fermentation\_to\_acetate\_and\_lactate\_II  
 PWY\_6386\_\_UDP\_N\_acetylmuramoyl\_pentapeptide\_biosynthesis\_II\_(lysine\_containing)\_g\_\_Rothia\_mucilaginosa  
 VALSYN\_PWY\_\_L\_valine\_biosynthesis\_g\_\_Rothia\_s\_\_Rothia\_mucilaginosa  
 PWY\_7197\_\_pyrimidine\_deoxyribonucleotide\_phosphorylation\_g\_\_Sutterella\_s\_\_Sutterella\_wadsworthii  
 UNINTEGRATED\_g\_\_Rothia\_s\_\_Rothia\_mucilaginosa  
 PWY\_7664\_\_oleate\_biosynthesis\_IV\_(anaerobic)\_unclassified

ARGSYN\_PWY\_\_L\_arginine\_biosynthesis\_I\_(via\_L\_ornithine)  
 PPGPPMET\_PWY\_\_ppGpp\_biosynthesis  
 PWY\_3841\_\_folate\_transformations\_II  
 FASYN\_ELONG\_PWY\_\_fatty\_acid\_elongation\_\_\_saturated\_unclassified  
 PWY\_5189\_\_tetrapyrrole\_biosynthesis\_II\_(from\_glycine)\_g\_\_Rothia\_s\_\_Rothia\_mucilaginosa  
 PEPTIDOLYCANSYN\_PWY\_\_peptidoglycan\_biosynthesis\_I\_(meso\_diaminopimelate\_containing)\_g  
 PWY\_5188\_\_tetrapyrrole\_biosynthesis\_I\_(from\_glutamate)\_g\_\_Rothia\_s\_\_Rothia\_mucilaginosa  
 PWY\_5675\_\_nitrate\_reduction\_V\_(assimilatory)\_unclassified  
 PWY0\_1241\_\_ADP\_L\_glycero\_&beta\_\_D\_manno\_heptose\_biosynthesis\_unclassified  
 PWY\_4981\_\_L\_proline\_biosynthesis\_II\_(from\_arginine)  
 PWY\_6270\_\_isoprene\_biosynthesis\_I  
 PWY\_6121\_\_5\_aminoimidazole\_ribose\_nucleotide\_biosynthesis\_I\_g\_\_Rothia\_s\_\_Rothia\_mucilaginosa  
 PWY\_6282\_\_palmitoleate\_biosynthesis\_I\_(from\_(5Z)\_dodec\_5\_enoate)\_unclassified  
 PWY\_6531\_\_mannitol\_cycle  
 PWY\_6612\_\_superpathway\_of\_tetrahydrofolate\_biosynthesis  
 PWY\_5973\_\_cis\_vaccenate\_biosynthesis  
 PWY\_7400\_\_L\_arginine\_biosynthesis\_IV\_(archaeobacteria)  
 PWY\_7219\_\_adenosine\_ribose\_nucleotides\_de\_novo\_biosynthesis\_g\_\_Rothia\_s\_\_Rothia\_mucilaginosa  
 FUCCAT\_PWY\_\_fucose\_degradation  
 OANTIGEN\_PWY\_\_O\_antigen\_building\_blocks\_biosynthesis\_(E\_coli)  
 PWY\_7279\_\_aerobic\_respiration\_II\_(cytochrome\_c\_(yeast))\_unclassified  
 PWY\_6737\_\_starch\_degradation\_V\_g\_\_Lactococcus\_s\_\_Lactococcus\_lactis  
 FOLSYN\_PWY\_\_superpathway\_of\_tetrahydrofolate\_biosynthesis\_and\_salvage  
 PWY\_6151\_\_S\_adenosyl\_L\_methionine\_cycle\_I\_g\_\_Rothia\_s\_\_Rothia\_mucilaginosa  
 PWY\_6123\_\_inosine\_5\_\_phosphate\_biosynthesis\_I  
 PWY\_6124\_\_inosine\_5\_\_phosphate\_biosynthesis\_II  
 P461\_PWY\_\_hexitol\_fermentation\_to\_lactate,formate,ethanol\_and\_acetate  
 P461\_PWY\_\_hexitol\_fermentation\_to\_lactate,formate,ethanol\_and\_acetate\_unclassified  
 PWY\_4242\_\_pantothenate\_and\_coenzyme\_A\_biosynthesis\_III  
 PWY\_2942\_\_L\_lysine\_biosynthesis\_III\_g\_\_Rothia\_s\_\_Rothia\_mucilaginosa  
 PWY\_5723\_\_Rubisco\_shunt\_unclassified  
 PWY490\_3\_\_nitrate\_reduction\_VI\_(assimilatory)  
 PWY\_6606\_\_guanosine\_nucleotides\_degradation\_II\_g\_\_Escherichia\_s\_\_Escherichia\_coli  
 PWY\_5097\_\_L\_lysine\_biosynthesis\_VI\_g\_\_Rothia\_s\_\_Rothia\_mucilaginosa  
 PWY\_5971\_\_palmitate\_biosynthesis\_II\_(bacteria\_and\_plants)\_unclassified  
 PWY\_7039\_\_phosphatidate\_metabolism,as\_a\_signaling\_molecule  
 PWY\_6353\_\_purine\_nucleotides\_degradation\_II\_(aerobic)  
 BRANCHED\_CHAIN\_AA\_SYN\_PWY\_\_superpathway\_of\_branched\_amino\_acid\_biosynthesis\_g\_\_Bif  
 PWY\_6471\_\_peptidoglycan\_biosynthesis\_IV\_(Enterococcus\_faecium)\_unclassified  
 3\_HYDROXYPHENYLACETATE\_DEGRADATION\_PWY\_\_4\_hydroxyphenylacetate\_degradation  
 LACTOSECAT\_PWY\_\_lactose\_and\_galactose\_degradation\_I  
 PANTO\_PWY\_\_phosphopantothenate\_biosynthesis\_I\_g\_\_Rothia\_s\_\_Rothia\_mucilaginosa  
 PWY\_7221\_\_guanosine\_ribose\_nucleotides\_de\_novo\_biosynthesis  
 COLANSYN\_PWY\_\_colanic\_acid\_building\_blocks\_biosynthesis  
 PWY\_5686\_\_UMP\_biosynthesis\_g\_\_Rothia\_s\_\_Rothia\_mucilaginosa  
 PWY\_7220\_\_adenosine\_deoxyribonucleotides\_de\_novo\_biosynthesis\_II\_unclassified  
 PWY\_7222\_\_guanosine\_deoxyribonucleotides\_de\_novo\_biosynthesis\_II\_unclassified



UNINTEGRATED\_g\_\_Bifidobacterium\_s\_\_Bifidobacterium\_longum  
 PWY\_5103\_\_L\_isoleucine\_biosynthesis\_III\_g\_\_Bifidobacterium\_s\_\_Bifidobacterium\_longum  
 PWY\_5154\_\_L\_arginine\_biosynthesis\_III\_(via\_N\_acetyl\_L\_citrulline)\_unclassified  
 1CMET2\_PWY\_\_N10\_formyl\_tetrahydrofolate\_biosynthesis  
 PWY\_6876\_\_isopropanol\_biosynthesis  
 COA\_PWY\_\_coenzyme\_A\_biosynthesis\_I  
 FAO\_PWY\_\_fatty\_acid\_&beta\_oxidation\_I  
 RIBOSYN2\_PWY\_\_flavin\_biosynthesis\_I\_(bacteria\_and\_plants)  
 PWY\_5690\_\_TCA\_cycle\_II\_(plants\_and\_fungi)  
 PWY\_5676\_\_acetyl\_CoA\_fermentation\_to\_butanoate\_II  
 ASPASN\_PWY\_\_superpathway\_of\_L\_aspartate\_and\_L\_asparagine\_biosynthesis  
 PWY\_6608\_\_guanosine\_nucleotides\_degradation\_III  
 PWY\_7111\_\_pyruvate\_fermentation\_to\_isobutanol\_(engineered)\_g\_\_Lactococcus\_s\_\_Lactococcus  
 DTDPRHAMSYN\_PWY\_\_dTDP\_L\_rhamnose\_biosynthesis\_I\_g\_\_Bifidobacterium\_s\_\_Bifidobacterium  
 PWY\_7539\_\_6\_hydroxymethyl\_dihydropterin\_diphosphate\_biosynthesis\_III\_(Chlamydia)  
 PWY\_5100\_\_pyruvate\_fermentation\_to\_acetate\_and\_lactate\_II\_g\_\_Actinomyces\_s\_\_Actinomyces  
 ILEUSYN\_PWY\_\_L\_isoleucine\_biosynthesis\_I\_(from\_threonine)\_g\_\_Bifidobacterium\_s\_\_Bifidobacterium  
 VALSYN\_PWY\_\_L\_valine\_biosynthesis\_g\_\_Bifidobacterium\_s\_\_Bifidobacterium\_longum  
 PWY\_4702\_\_phytate\_degradation\_I  
 PWY\_5863\_\_superpathway\_of\_phylloquinol\_biosynthesis\_unclassified  
 PENTOSE\_P\_PWY\_\_pentose\_phosphate\_pathway  
 PWYG\_321\_\_mycolate\_biosynthesis\_unclassified  
 PWY\_6936\_\_seleno\_amino\_acid\_biosynthesis\_g\_\_Lactococcus\_s\_\_Lactococcus\_lactis  
 GLYOXYLATE\_BYPASS\_\_glyoxylate\_cycle\_unclassified  
 ANAGLYCOLYSIS\_PWY\_\_glycolysis\_III\_(from\_glucose)  
 TCA\_GLYOX\_BYPASS\_\_superpathway\_of\_glyoxylate\_bypass\_and\_TCA\_unclassified  
 PWY\_5913\_\_TCA\_cycle\_VI\_(obligate\_autotrophs)\_unclassified  
 PWY\_2942\_\_L\_lysine\_biosynthesis\_III  
 P221\_PWY\_\_octane\_oxidation  
 PWY\_7219\_\_adenosine\_ribonucleotides\_de\_novo\_biosynthesis  
 PWY\_5136\_\_fatty\_acid\_&beta\_oxidation\_II\_(peroxisome)  
 UNINTEGRATED  
 LACTOSECAT\_PWY\_\_lactose\_and\_galactose\_degradation\_I\_g\_\_Lactococcus\_s\_\_Lactococcus\_lactis  
 SO4ASSIM\_PWY\_\_sulfate\_reduction\_I\_(assimilatory)\_g\_\_Haemophilus\_s\_\_Haemophilus\_parainfluenzae  
 PYRIDNUCSAL\_PWY\_\_NAD\_salvage\_pathway\_I\_unclassified  
 COA\_PWY\_1\_\_coenzyme\_A\_biosynthesis\_II\_(mammalian)  
 PWY\_7199\_\_pyrimidine\_deoxyribonucleosides\_salvage  
 NONMEVIPP\_PWY\_\_methylerythritol\_phosphate\_pathway\_I\_g\_\_Actinomyces\_s\_\_Actinomyces\_groenlandicus  
 PWY\_7323\_\_superpathway\_of\_GDP\_mannose\_derived\_O\_antigen\_building\_blocks\_biosynthesis  
 PWY66\_389\_\_phytol\_degradation\_unclassified  
 PWY\_5692\_\_allantoin\_degradation\_to\_glyoxylate\_II  
 URDEGR\_PWY\_\_superpathway\_of\_allantoin\_degradation\_in\_plants  
 PWY\_6969\_\_TCA\_cycle\_V\_(2\_oxoglutarate\_ferredoxin\_oxidoreductase)  
 PWY\_7117\_\_C4\_photosynthetic\_carbon\_assimilation\_cycle,\_PEPCK\_type\_unclassified  
 GLYCOLYSIS\_TCA\_GLYOX\_BYPASS\_\_superpathway\_of\_glycolysis,\_pyruvate\_dehydrogenase,\_TCA,\_1CMET2\_PWY\_\_N10\_formyl\_tetrahydrofolate\_biosynthesis\_unclassified  
 PWY\_5989\_\_stearate\_biosynthesis\_II\_(bacteria\_and\_plants)

P221\_PWY\_\_octane\_oxidation\_unclassified  
PWY\_6151\_\_S\_adenosyl\_L\_methionine\_cycle\_I  
COA\_PWY\_1\_\_coenzyme\_A\_biosynthesis\_II\_(mammalian)\_g\_\_Bifidobacterium\_s\_\_Bifidobacteriu  
PWY\_5103\_\_L\_isoleucine\_biosynthesis\_III\_g\_\_Lactococcus\_s\_\_Lactococcus\_lactis  
CALVIN\_PWY\_\_Calvin\_Benson\_Bassham\_cycle\_g\_\_Lactococcus\_s\_\_Lactococcus\_lactis  
BRANCHED\_CHAIN\_AA\_SYN\_PWY\_\_superpathway\_of\_branched\_amino\_acid\_biosynthesis\_g\_\_Lac  
PWY\_6318\_\_L\_phenylalanine\_degradation\_IV\_(mammalian,\_via\_side\_chain)  
PWY\_7663\_\_gondoate\_biosynthesis\_(anaerobic)\_g\_\_Haemophilus\_s\_\_Haemophilus\_parainfluenz  
PWY\_6318\_\_L\_phenylalanine\_degradation\_IV\_(mammalian,\_via\_side\_chain)\_unclassified  
UDPNAGSYN\_PWY\_\_UDP\_N\_acetyl\_D\_glucosamine\_biosynthesis\_I\_g\_\_Bifidobacterium\_s\_\_Bifido  
TCA\_\_TCA\_cycle\_I\_(prokaryotic)  
PWY\_6609\_\_adenine\_and\_adenosine\_salvage\_III\_g\_\_Lactococcus\_s\_\_Lactococcus\_lactis  
PWY\_7663\_\_gondoate\_biosynthesis\_(anaerobic)\_unclassified  
PWY0\_1297\_\_superpathway\_of\_purine\_deoxyribonucleosides\_degradation\_unclassified  
DENOVOPURINE2\_PWY\_\_superpathway\_of\_purine\_nucleotides\_de\_novo\_biosynthesis\_II  
ARGSYN\_PWY\_\_L\_arginine\_biosynthesis\_I\_(via\_L\_ornithine)\_unclassified  
PWY\_5686\_\_UMP\_biosynthesis  
PWY0\_1296\_\_purine\_ribonucleosides\_degradation\_g\_\_Lactococcus\_s\_\_Lactococcus\_lactis  
PWY\_5973\_\_cis\_vaccenate\_biosynthesis\_unclassified  
PWY\_6700\_\_queuosine\_biosynthesis\_g\_\_Bacteroides\_s\_\_Bacteroides\_caccae  
PWY\_5910\_\_superpathway\_of\_geranylgeranyldiphosphate\_biosynthesis\_I\_(via\_mevalonate)\_uncl  
PWY\_5897\_\_superpathway\_of\_menaquinol\_11\_biosynthesis\_unclassified  
PWY\_5898\_\_superpathway\_of\_menaquinol\_12\_biosynthesis\_unclassified  
PWY\_5899\_\_superpathway\_of\_menaquinol\_13\_biosynthesis\_unclassified  
PWY\_5097\_\_L\_lysine\_biosynthesis\_VI  
PEPTIDOLYCANSYN\_PWY\_\_peptidoglycan\_biosynthesis\_I\_(meso\_diaminopimelate\_containing)  
PWY\_4981\_\_L\_proline\_biosynthesis\_II\_(from\_arginine)\_g\_\_Lactococcus\_s\_\_Lactococcus\_lactis  
PWY\_5097\_\_L\_lysine\_biosynthesis\_VI\_g\_\_Bacteroides\_s\_\_Bacteroides\_caccae  
PWY\_6113\_\_superpathway\_of\_mycolate\_biosynthesis  
PWY\_1269\_\_CMP\_3\_deoxy\_D\_manno\_octulosonate\_biosynthesis\_I\_g\_\_Bacteroides\_s\_\_Bacteroid  
PWY\_7219\_\_adenosine\_ribonucleotides\_de\_novo\_biosynthesis\_g\_\_Bifidobacterium\_s\_\_Bifidobac  
PWY\_2942\_\_L\_lysine\_biosynthesis\_III\_g\_\_Bacteroides\_s\_\_Bacteroides\_caccae  
PWY\_6123\_\_inosine\_5\_phosphate\_biosynthesis\_I\_g\_\_Bifidobacterium\_s\_\_Bifidobacterium\_longi  
PWY\_7357\_\_thiamin\_formation\_from\_pyriothiamine\_and\_oxythiamine\_(yeast)  
PWY\_7221\_\_guanosine\_ribonucleotides\_de\_novo\_biosynthesis\_g\_\_Bifidobacterium\_s\_\_Bifidobac  
PWY0\_1297\_\_superpathway\_of\_purine\_deoxyribonucleosides\_degradation\_g\_\_Lactococcus\_s\_\_L  
PWY\_6121\_\_5\_aminoimidazole\_ribonucleotide\_biosynthesis\_I\_g\_\_Bifidobacterium\_s\_\_Bifidobact  
PWY\_6122\_\_5\_aminoimidazole\_ribonucleotide\_biosynthesis\_II\_g\_\_Bifidobacterium\_s\_\_Bifidobact  
PWY\_6277\_\_superpathway\_of\_5\_aminoimidazole\_ribonucleotide\_biosynthesis\_g\_\_Bifidobacteriu  
PWY\_7219\_\_adenosine\_ribonucleotides\_de\_novo\_biosynthesis\_g\_\_Actinomyces\_s\_\_Actinomyces  
PWY\_6386\_\_UDP\_N\_acetylmuramoyl\_pentapeptide\_biosynthesis\_II\_(lysine\_containing)  
PWY\_6387\_\_UDP\_N\_acetylmuramoyl\_pentapeptide\_biosynthesis\_I\_(meso\_diaminopimelate\_con  
UNINTEGRATED\_g\_\_Haemophilus\_s\_\_Haemophilus\_parainfluenzae  
PANTO\_PWY\_\_phosphopantothenate\_biosynthesis\_I\_g\_\_Bacteroides\_s\_\_Bacteroides\_caccae  
PWY\_7111\_\_pyruvate\_fermentation\_to\_isobutanol\_(engineered)\_g\_\_Actinomyces\_s\_\_Actinomyce  
VALSYN\_PWY\_\_L\_valine\_biosynthesis\_g\_\_Actinomyces\_s\_\_Actinomyces\_graevenitzi  
UNINTEGRATED\_g\_\_Lactococcus\_s\_\_Lactococcus\_lactis

PWY\_5667\_CDP\_diacylglycerol\_biosynthesis\_I\_g\_Bacteroides\_s\_Bacteroides\_caccae  
 PWY0\_1319\_CDP\_diacylglycerol\_biosynthesis\_II\_g\_Bacteroides\_s\_Bacteroides\_caccae  
 PWY\_6151\_S\_adenosyl\_L\_methionine\_cycle\_I\_g\_Bifidobacterium\_s\_Bifidobacterium\_longum  
 COA\_PWY\_1\_coenzyme\_A\_biosynthesis\_II\_(mammalian)\_g\_Bacteroides\_s\_Bacteroides\_caccae  
 PWY\_7219\_adenosine\_ribonucleotides\_de\_novo\_biosynthesis\_g\_Bacteroides\_s\_Bacteroides\_c  
 PWY\_621\_sucrose\_degradation\_III\_(sucrose\_invertase)  
 PWY\_5100\_pyruvate\_fermentation\_to\_acetate\_and\_lactate\_II\_g\_Lactococcus\_s\_Lactococcus\_l  
 PWY\_6147\_6\_hydroxymethyl\_dihydropterin\_diphosphate\_biosynthesis\_I  
 RHAMCAT\_PWY\_L\_rhamnose\_degradation\_I\_g\_Bacteroides\_s\_Bacteroides\_caccae  
 PWY\_724\_superpathway\_of\_L\_lysine\_L\_threonine\_and\_L\_methionine\_biosynthesis\_II  
 PWY\_5686\_UMP\_biosynthesis\_g\_Bacteroides\_s\_Bacteroides\_caccae  
 PWY\_7400\_L\_arginine\_biosynthesis\_IV\_(archaeobacteria)\_unclassified  
 PWY\_6609\_adenine\_and\_adenosine\_salvage\_III\_g\_Bacteroides\_s\_Bacteroides\_caccae  
 PWY\_6892\_thiazole\_biosynthesis\_I\_(E\_coli)\_unclassified  
 ARGSYNBSUB\_PWY\_L\_arginine\_biosynthesis\_II\_(acetyl\_cycle)\_g\_Bifidobacterium\_s\_Bifidobact  
 PWY\_7221\_guanosine\_ribonucleotides\_de\_novo\_biosynthesis\_g\_Bacteroides\_s\_Bacteroides\_c  
 NAGLIPASYN\_PWY\_lipid\_IVA\_biosynthesis\_g\_Haemophilus\_s\_Haemophilus\_parainfluenzae  
 PWY\_7039\_phosphatidate\_metabolism\_as\_a\_signaling\_molecule\_g\_Escherichia\_s\_Escherichia  
 HOMOSER\_METSYN\_PWY\_L\_methionine\_biosynthesis\_I\_g\_Lactococcus\_s\_Lactococcus\_lactis  
 PWY\_5973\_cis\_vaccenate\_biosynthesis\_g\_Lactococcus\_s\_Lactococcus\_lactis  
 DTDPRHAMSYN\_PWY\_dTDP\_L\_rhamnose\_biosynthesis\_I\_g\_Bacteroides\_s\_Bacteroides\_caccae  
 PWY\_5695\_urate\_biosynthesis\_inosine\_5\_phosphate\_degradation\_g\_Bacteroides\_s\_Bacteroides\_c  
 PWY\_7111\_pyruvate\_fermentation\_to\_isobutanol\_(engineered)\_g\_Bifidobacterium\_s\_Bifidobact  
 ARGININE\_SYN4\_PWY\_L\_ornithine\_de\_novo\_biosynthesis\_g\_Bacteroides\_s\_Bacteroides\_caccae  
 GLUTORN\_PWY\_L\_ornithine\_biosynthesis\_g\_Bifidobacterium\_s\_Bifidobacterium\_longum  
 DAPLYSINESYN\_PWY\_L\_lysine\_biosynthesis\_I\_g\_Haemophilus\_s\_Haemophilus\_parainfluenzae  
 PWY\_7663\_gondoate\_biosynthesis\_(anaerobic)\_g\_Bacteroides\_s\_Bacteroides\_caccae  
 PWY\_7115\_C4\_photosynthetic\_carbon\_assimilation\_cycle,\_NAD\_ME\_type  
 PWY\_7111\_pyruvate\_fermentation\_to\_isobutanol\_(engineered)\_g\_Bacteroides\_s\_Bacteroides\_c  
 VALSYN\_PWY\_L\_valine\_biosynthesis\_g\_Bacteroides\_s\_Bacteroides\_caccae  
 THRESYN\_PWY\_superpathway\_of\_L\_threonine\_biosynthesis\_g\_Actinomyces\_s\_Actinomyces\_g  
 PWY\_5686\_UMP\_biosynthesis\_g\_Actinomyces\_s\_Actinomyces\_graevenitzii  
 PWY66\_422\_D\_galactose\_degradation\_V\_(Leloir\_pathway)  
 PWY\_6122\_5\_aminoimidazole\_ribonucleotide\_biosynthesis\_II  
 PWY\_6277\_superpathway\_of\_5\_aminoimidazole\_ribonucleotide\_biosynthesis  
 HISTSYN\_PWY\_L\_histidine\_biosynthesis\_g\_Bifidobacterium\_s\_Bifidobacterium\_longum  
 PWY\_5345\_superpathway\_of\_L\_methionine\_biosynthesis\_(by\_sulfhydrylation)  
 PWY\_1042\_glycolysis\_IV\_(plant\_cytosol)\_g\_Bacteroides\_s\_Bacteroides\_caccae  
 ARGSYN\_PWY\_L\_arginine\_biosynthesis\_I\_(via\_L\_ornithine)\_g\_Bifidobacterium\_s\_Bifidobacteri  
 PWY\_7400\_L\_arginine\_biosynthesis\_IV\_(archaeobacteria)\_g\_Bifidobacterium\_s\_Bifidobacterium  
 UNINTEGRATED\_g\_Adlercreutzia\_s\_Adlercreutzia\_equolifaciens  
 UNINTEGRATED\_g\_Akkermansia\_s\_Akkermansia\_muciniphila  
 UNINTEGRATED\_g\_Alistipes\_s\_Alistipes\_finegoldii  
 UNINTEGRATED\_g\_Alistipes\_s\_Alistipes\_indistinctus  
 UNINTEGRATED\_g\_Alistipes\_s\_Alistipes\_onderdonkii  
 UNINTEGRATED\_g\_Alistipes\_s\_Alistipes\_putredinis  
 UNINTEGRATED\_g\_Alistipes\_s\_Alistipes\_senegalensis

|                                                                          |
|--------------------------------------------------------------------------|
| UNINTEGRATED_g_Alistipes_s_Alistipes_shahii                              |
| UNINTEGRATED_g_Alistipes_s_Alistipes_sp_HGB5                             |
| UNINTEGRATED_g_Anaerofustis_s_Anaerofustis_stercorihominis               |
| UNINTEGRATED_g_Anaerostipes_s_Anaerostipes_hadrus                        |
| UNINTEGRATED_g_Anaerotruncus_s_Anaerotruncus_colihominis                 |
| UNINTEGRATED_g_Bacteroides_s_Bacteroides_cellulosilyticus                |
| UNINTEGRATED_g_Bacteroides_s_Bacteroides_clarus                          |
| UNINTEGRATED_g_Bacteroides_s_Bacteroides_coprocola                       |
| UNINTEGRATED_g_Bacteroides_s_Bacteroides_dorei                           |
| UNINTEGRATED_g_Bacteroides_s_Bacteroides_eggerthii                       |
| UNINTEGRATED_g_Bacteroides_s_Bacteroides_faecis                          |
| UNINTEGRATED_g_Bacteroides_s_Bacteroides_finegoldii                      |
| UNINTEGRATED_g_Bacteroides_s_Bacteroides_intestinalis                    |
| UNINTEGRATED_g_Bacteroides_s_Bacteroides_massiliensis                    |
| UNINTEGRATED_g_Bacteroides_s_Bacteroides_ovatus                          |
| UNINTEGRATED_g_Bacteroides_s_Bacteroides_plebeius                        |
| UNINTEGRATED_g_Bacteroides_s_Bacteroides_salysiae                        |
| UNINTEGRATED_g_Bacteroides_s_Bacteroides_sp_1_1_30                       |
| UNINTEGRATED_g_Bacteroides_s_Bacteroides_sp_1_1_6                        |
| UNINTEGRATED_g_Bacteroides_s_Bacteroides_sp_2_1_22                       |
| UNINTEGRATED_g_Bacteroides_s_Bacteroides_sp_2_2_4                        |
| UNINTEGRATED_g_Bacteroides_s_Bacteroides_sp_3_1_19                       |
| UNINTEGRATED_g_Bacteroides_s_Bacteroides_sp_3_1_23                       |
| UNINTEGRATED_g_Bacteroides_s_Bacteroides_sp_3_1_33FAA                    |
| UNINTEGRATED_g_Bacteroides_s_Bacteroides_sp_3_1_40A                      |
| UNINTEGRATED_g_Bacteroides_s_Bacteroides_sp_4_3_47FAA                    |
| UNINTEGRATED_g_Bacteroides_s_Bacteroides_sp_9_1_42FAA                    |
| UNINTEGRATED_g_Bacteroides_s_Bacteroides_sp_D20                          |
| UNINTEGRATED_g_Bacteroides_s_Bacteroides_stercoris                       |
| UNINTEGRATED_g_Bacteroides_s_Bacteroides_thetaiotaomicron                |
| UNINTEGRATED_g_Bacteroides_s_Bacteroides_uniformis                       |
| UNINTEGRATED_g_Bacteroides_s_Bacteroides_xylanisolvans                   |
| UNINTEGRATED_g_Barnesiella_s_Barnesiella_intestinihominis                |
| UNINTEGRATED_g_Bifidobacterium_s_Bifidobacterium_angulatum               |
| UNINTEGRATED_g_Bifidobacterium_s_Bifidobacterium_animalis                |
| UNINTEGRATED_g_Bifidobacterium_s_Bifidobacterium_bifidum                 |
| UNINTEGRATED_g_Bifidobacterium_s_Bifidobacterium_catenulatum             |
| UNINTEGRATED_g_Bifidobacterium_s_Bifidobacterium_dentium                 |
| UNINTEGRATED_g_Bifidobacterium_s_Bifidobacterium_pseudocatenulatum       |
| UNINTEGRATED_g_Bilophila_s_Bilophila_wadsworthia                         |
| UNINTEGRATED_g_Blautia_s_Blautia_hydrogenotrophica                       |
| UNINTEGRATED_g_Blautia_s_Blautia_sp_KLE_1732                             |
| UNINTEGRATED_g_Blautia_s_Ruminococcus_gnavus                             |
| UNINTEGRATED_g_Blautia_s_Ruminococcus_obeum                              |
| UNINTEGRATED_g_Burkholderiales_noname_s_Burkholderiales_bacterium_1_1_47 |
| UNINTEGRATED_g_Butyrvibrio_s_Butyrvibrio_crossotus                       |
| UNINTEGRATED_g_Catenibacterium_s_Catenibacterium_mitsuokai               |

|                                                                                   |
|-----------------------------------------------------------------------------------|
| UNINTEGRATED_g_Citrobacter_s_Citrobacter_freundii                                 |
| UNINTEGRATED_g_Clostridiales_noname_s_Bacteroides_pectinophilus                   |
| UNINTEGRATED_g_Clostridiales_noname_s_Clostridiales_bacterium_1_7_47FAA           |
| UNINTEGRATED_g_Clostridium_s_Clostridium_asparagiforme                            |
| UNINTEGRATED_g_Clostridium_s_Clostridium_bolteae                                  |
| UNINTEGRATED_g_Clostridium_s_Clostridium_citroniae                                |
| UNINTEGRATED_g_Clostridium_s_Clostridium_clostridioforme                          |
| UNINTEGRATED_g_Clostridium_s_Clostridium_hathewayi                                |
| UNINTEGRATED_g_Clostridium_s_Clostridium_leptum                                   |
| UNINTEGRATED_g_Clostridium_s_Clostridium_perfringens                              |
| UNINTEGRATED_g_Clostridium_s_Clostridium_sp_L2_50                                 |
| UNINTEGRATED_g_Clostridium_s_Clostridium_sp_SS2_1                                 |
| UNINTEGRATED_g_Clostridium_s_Clostridium_symbiosum                                |
| UNINTEGRATED_g_Collinsella_s_Collinsella_intestinalis                             |
| UNINTEGRATED_g_Collinsella_s_Collinsella_tanakaei                                 |
| UNINTEGRATED_g_Coprobacter_s_Coprobacter_fastidiosus                              |
| UNINTEGRATED_g_Coprococcus_s_Coprococcus_catus                                    |
| UNINTEGRATED_g_Coprococcus_s_Coprococcus_eutactus                                 |
| UNINTEGRATED_g_Coprococcus_s_Coprococcus_sp_ART55_1                               |
| UNINTEGRATED_g_Dialister_s_Dialister_invisus                                      |
| UNINTEGRATED_g_Dorea_s_Dorea_formicigenerans                                      |
| UNINTEGRATED_g_Eggerthella_s_Eggerthella_lenta                                    |
| UNINTEGRATED_g_Eggerthella_s_Eggerthella_sp_1_3_56FAA                             |
| UNINTEGRATED_g_Eggerthella_s_Eggerthella_sp_HGA1                                  |
| UNINTEGRATED_g_Enterobacter_s_Enterobacter_cloacae                                |
| UNINTEGRATED_g_Enterococcus_s_Enterococcus_durans                                 |
| UNINTEGRATED_g_Enterococcus_s_Enterococcus_faecalis                               |
| UNINTEGRATED_g_Enterococcus_s_Enterococcus_faecium                                |
| UNINTEGRATED_g_Enterorhabdus_s_Enterorhabdus_caecimuris                           |
| UNINTEGRATED_g_Erysipelotrichaceae_noname_s_Clostridium_spiroforme                |
| UNINTEGRATED_g_Erysipelotrichaceae_noname_s_Erysipelotrichaceae_bacterium_21_3    |
| UNINTEGRATED_g_Erysipelotrichaceae_noname_s_Erysipelotrichaceae_bacterium_2_2_44A |
| UNINTEGRATED_g_Erysipelotrichaceae_noname_s_Eubacterium_biforme                   |
| UNINTEGRATED_g_Erysipelotrichaceae_noname_s_Eubacterium_cylindroides              |
| UNINTEGRATED_g_Eubacterium_s_Eubacterium_eligens                                  |
| UNINTEGRATED_g_Eubacterium_s_Eubacterium_hallii                                   |
| UNINTEGRATED_g_Eubacterium_s_Eubacterium_ramulus                                  |
| UNINTEGRATED_g_Eubacterium_s_Eubacterium_siraeum                                  |
| UNINTEGRATED_g_Eubacterium_s_Eubacterium_sp_3_1_31                                |
| UNINTEGRATED_g_Eubacterium_s_Eubacterium_ventriosum                               |
| UNINTEGRATED_g_Fusobacterium_s_Fusobacterium_nucleatum                            |
| UNINTEGRATED_g_Gemella_s_Gemella_sanguinis                                        |
| UNINTEGRATED_g_Gordonibacter_s_Gordonibacter_pamelaeae                            |
| UNINTEGRATED_g_Holdemania_s_Holdemania_filiformis                                 |
| UNINTEGRATED_g_Klebsiella_s_Klebsiella_pneumoniae                                 |
| UNINTEGRATED_g_Lachnospiraceae_noname_s_Lachnospiraceae_bacterium_1_1_57FAA       |
| UNINTEGRATED_g_Lachnospiraceae_noname_s_Lachnospiraceae_bacterium_1_4_56FAA       |

UNINTEGRATED\_g\_Lachnospiraceae\_noname\_s\_Lachnospiraceae\_bacterium\_2\_1\_58FAA  
UNINTEGRATED\_g\_Lachnospiraceae\_noname\_s\_Lachnospiraceae\_bacterium\_3\_1\_46FAA  
UNINTEGRATED\_g\_Lachnospiraceae\_noname\_s\_Lachnospiraceae\_bacterium\_3\_1\_57FAA\_CT1  
UNINTEGRATED\_g\_Lachnospiraceae\_noname\_s\_Lachnospiraceae\_bacterium\_5\_1\_63FAA  
UNINTEGRATED\_g\_Lachnospiraceae\_noname\_s\_Lachnospiraceae\_bacterium\_7\_1\_58FAA  
UNINTEGRATED\_g\_Lachnospiraceae\_noname\_s\_Lachnospiraceae\_bacterium\_9\_1\_43BFAA  
UNINTEGRATED\_g\_Lactobacillus\_s\_Lactobacillus\_casei\_paracasei  
UNINTEGRATED\_g\_Lactobacillus\_s\_Lactobacillus\_fermentum  
UNINTEGRATED\_g\_Lactobacillus\_s\_Lactobacillus\_rhamnosus  
UNINTEGRATED\_g\_Lactobacillus\_s\_Lactobacillus\_ruminis  
UNINTEGRATED\_g\_Nakaseomyces\_s\_Candida\_glabrata  
UNINTEGRATED\_g\_Odoribacter\_s\_Odoribacter\_laneus  
UNINTEGRATED\_g\_Odoribacter\_s\_Odoribacter\_splanchnicus  
UNINTEGRATED\_g\_Oxalobacter\_s\_Oxalobacter\_formigenes  
UNINTEGRATED\_g\_Parabacteroides\_s\_Parabacteroides\_distasonis  
UNINTEGRATED\_g\_Parabacteroides\_s\_Parabacteroides\_goldsteinii  
UNINTEGRATED\_g\_Parabacteroides\_s\_Parabacteroides\_johnsonii  
UNINTEGRATED\_g\_Parabacteroides\_s\_Parabacteroides\_merdae  
UNINTEGRATED\_g\_Parabacteroides\_s\_Parabacteroides\_sp\_20\_3  
UNINTEGRATED\_g\_Parabacteroides\_s\_Parabacteroides\_sp\_D13  
UNINTEGRATED\_g\_Paraprevotella\_s\_Paraprevotella\_clara  
UNINTEGRATED\_g\_Paraprevotella\_s\_Paraprevotella\_xylaniphila  
UNINTEGRATED\_g\_Parasutterella\_s\_Parasutterella\_excrementihominis  
UNINTEGRATED\_g\_Pediococcus\_s\_Pediococcus\_acidilactici  
UNINTEGRATED\_g\_Pediococcus\_s\_Pediococcus\_lolii  
UNINTEGRATED\_g\_Peptostreptococcaceae\_noname\_s\_Clostridium\_bartlettii  
UNINTEGRATED\_g\_Phascolarctobacterium\_s\_Phascolarctobacterium\_succinatutens  
UNINTEGRATED\_g\_Prevotella\_s\_Prevotella\_copri  
UNINTEGRATED\_g\_Propionibacterium\_s\_Propionibacterium\_freudenreichii  
UNINTEGRATED\_g\_Roseburia\_s\_Roseburia\_hominis  
UNINTEGRATED\_g\_Roseburia\_s\_Roseburia\_inulinivorans  
UNINTEGRATED\_g\_Ruminococcaceae\_noname\_s\_Ruminococcaceae\_bacterium\_D16  
UNINTEGRATED\_g\_Ruminococcus\_s\_Ruminococcus\_callidus  
UNINTEGRATED\_g\_Ruminococcus\_s\_Ruminococcus\_champanellensis  
UNINTEGRATED\_g\_Ruminococcus\_s\_Ruminococcus\_sp  
UNINTEGRATED\_g\_Ruminococcus\_s\_Ruminococcus\_sp\_JC304  
UNINTEGRATED\_g\_Slackia\_s\_Slackia\_piriformis  
UNINTEGRATED\_g\_Solobacterium\_s\_Solobacterium\_moorei  
UNINTEGRATED\_g\_Streptococcus\_s\_Streptococcus\_australis  
UNINTEGRATED\_g\_Streptococcus\_s\_Streptococcus\_mitis\_oralis\_pneumoniae  
UNINTEGRATED\_g\_Streptococcus\_s\_Streptococcus\_sanguinis  
UNINTEGRATED\_g\_Subdoligranulum\_s\_Subdoligranulum\_sp\_4\_3\_54A2FAA  
UNINTEGRATED\_g\_Veillonella\_s\_Veillonella\_dispar  
UNINTEGRATED\_g\_Veillonella\_s\_Veillonella\_parvula  
1CMET2\_PWY\_N10\_formyl\_tetrahydrofolate\_biosynthesis\_g\_Akkermansia\_s\_Akkermansia\_m  
1CMET2\_PWY\_N10\_formyl\_tetrahydrofolate\_biosynthesis\_g\_Bacteroides\_s\_Bacteroides\_cellu  
1CMET2\_PWY\_N10\_formyl\_tetrahydrofolate\_biosynthesis\_g\_Bacteroides\_s\_Bacteroides\_claru

1CMET2\_PWY\_\_N10\_formyl\_tetrahydrofolate\_biosynthesis\_g\_\_Bacteroides\_s\_\_Bacteroides\_copr  
1CMET2\_PWY\_\_N10\_formyl\_tetrahydrofolate\_biosynthesis\_g\_\_Bacteroides\_s\_\_Bacteroides\_faeci  
1CMET2\_PWY\_\_N10\_formyl\_tetrahydrofolate\_biosynthesis\_g\_\_Bacteroides\_s\_\_Bacteroides\_fineg  
1CMET2\_PWY\_\_N10\_formyl\_tetrahydrofolate\_biosynthesis\_g\_\_Bacteroides\_s\_\_Bacteroides\_fragil  
1CMET2\_PWY\_\_N10\_formyl\_tetrahydrofolate\_biosynthesis\_g\_\_Bacteroides\_s\_\_Bacteroides\_intes  
1CMET2\_PWY\_\_N10\_formyl\_tetrahydrofolate\_biosynthesis\_g\_\_Bacteroides\_s\_\_Bacteroides\_mass  
1CMET2\_PWY\_\_N10\_formyl\_tetrahydrofolate\_biosynthesis\_g\_\_Bacteroides\_s\_\_Bacteroides\_ovati  
1CMET2\_PWY\_\_N10\_formyl\_tetrahydrofolate\_biosynthesis\_g\_\_Bacteroides\_s\_\_Bacteroides\_sp\_1  
1CMET2\_PWY\_\_N10\_formyl\_tetrahydrofolate\_biosynthesis\_g\_\_Bacteroides\_s\_\_Bacteroides\_sp\_1  
1CMET2\_PWY\_\_N10\_formyl\_tetrahydrofolate\_biosynthesis\_g\_\_Bacteroides\_s\_\_Bacteroides\_sp\_2  
1CMET2\_PWY\_\_N10\_formyl\_tetrahydrofolate\_biosynthesis\_g\_\_Bacteroides\_s\_\_Bacteroides\_sp\_3  
1CMET2\_PWY\_\_N10\_formyl\_tetrahydrofolate\_biosynthesis\_g\_\_Bacteroides\_s\_\_Bacteroides\_sp\_D  
1CMET2\_PWY\_\_N10\_formyl\_tetrahydrofolate\_biosynthesis\_g\_\_Bacteroides\_s\_\_Bacteroides\_sterc  
1CMET2\_PWY\_\_N10\_formyl\_tetrahydrofolate\_biosynthesis\_g\_\_Bacteroides\_s\_\_Bacteroides\_theta  
1CMET2\_PWY\_\_N10\_formyl\_tetrahydrofolate\_biosynthesis\_g\_\_Bacteroides\_s\_\_Bacteroides\_unifc  
1CMET2\_PWY\_\_N10\_formyl\_tetrahydrofolate\_biosynthesis\_g\_\_Bacteroides\_s\_\_Bacteroides\_xylar  
1CMET2\_PWY\_\_N10\_formyl\_tetrahydrofolate\_biosynthesis\_g\_\_Citrobacter\_s\_\_Citrobacter\_freunc  
1CMET2\_PWY\_\_N10\_formyl\_tetrahydrofolate\_biosynthesis\_g\_\_Klebsiella\_s\_\_Klebsiella\_pneumon  
1CMET2\_PWY\_\_N10\_formyl\_tetrahydrofolate\_biosynthesis\_g\_\_Lactococcus\_s\_\_Lactococcus\_lactis  
1CMET2\_PWY\_\_N10\_formyl\_tetrahydrofolate\_biosynthesis\_g\_\_Parabacteroides\_s\_\_Parabacteroides  
1CMET2\_PWY\_\_N10\_formyl\_tetrahydrofolate\_biosynthesis\_g\_\_Parabacteroides\_s\_\_Parabacteroides  
1CMET2\_PWY\_\_N10\_formyl\_tetrahydrofolate\_biosynthesis\_g\_\_Parabacteroides\_s\_\_Parabacteroides  
1CMET2\_PWY\_\_N10\_formyl\_tetrahydrofolate\_biosynthesis\_g\_\_Parabacteroides\_s\_\_Parabacteroides  
1CMET2\_PWY\_\_N10\_formyl\_tetrahydrofolate\_biosynthesis\_g\_\_Parabacteroides\_s\_\_Parabacteroides  
3\_HYDROXYPHENYLACETATE\_DEGRADATION\_PWY\_\_4\_hydroxyphenylacetate\_degradation\_g\_\_Esc  
ALL\_CHORISMATE\_PWY\_\_superpathway\_of\_chorismate\_metabolism  
ALLANTOINDEG\_PWY\_\_superpathway\_of\_allantoin\_degradation\_in\_yeast  
ALLANTOINDEG\_PWY\_\_superpathway\_of\_allantoin\_degradation\_in\_yeast\_unclassified  
ANAEROFrucAT\_PWY\_\_homolactic\_fermentation\_g\_\_Lactococcus\_s\_\_Lactococcus\_lactis  
ANAGLYCOLYSIS\_PWY\_\_glycolysis\_III\_(from\_glucose)\_g\_\_Alistipes\_s\_\_Alistipes\_senegalensis  
ANAGLYCOLYSIS\_PWY\_\_glycolysis\_III\_(from\_glucose)\_g\_\_Alistipes\_s\_\_Alistipes\_shahii  
ANAGLYCOLYSIS\_PWY\_\_glycolysis\_III\_(from\_glucose)\_g\_\_Bacteroides\_s\_\_Bacteroides\_ovatus  
ANAGLYCOLYSIS\_PWY\_\_glycolysis\_III\_(from\_glucose)\_g\_\_Bacteroides\_s\_\_Bacteroides\_sp\_1\_1\_30  
ANAGLYCOLYSIS\_PWY\_\_glycolysis\_III\_(from\_glucose)\_g\_\_Bacteroides\_s\_\_Bacteroides\_sp\_2\_1\_22  
ANAGLYCOLYSIS\_PWY\_\_glycolysis\_III\_(from\_glucose)\_g\_\_Bacteroides\_s\_\_Bacteroides\_sp\_2\_2\_4  
ANAGLYCOLYSIS\_PWY\_\_glycolysis\_III\_(from\_glucose)\_g\_\_Bacteroides\_s\_\_Bacteroides\_sp\_3\_1\_23  
ANAGLYCOLYSIS\_PWY\_\_glycolysis\_III\_(from\_glucose)\_g\_\_Bacteroides\_s\_\_Bacteroides\_xylanisolve  
ANAGLYCOLYSIS\_PWY\_\_glycolysis\_III\_(from\_glucose)\_g\_\_Citrobacter\_s\_\_Citrobacter\_freundii  
ANAGLYCOLYSIS\_PWY\_\_glycolysis\_III\_(from\_glucose)\_g\_\_Fusobacterium\_s\_\_Fusobacterium\_nucle  
ANAGLYCOLYSIS\_PWY\_\_glycolysis\_III\_(from\_glucose)\_g\_\_Klebsiella\_s\_\_Klebsiella\_pneumoniae  
ANAGLYCOLYSIS\_PWY\_\_glycolysis\_III\_(from\_glucose)\_g\_\_Lactococcus\_s\_\_Lactococcus\_lactis  
ANAGLYCOLYSIS\_PWY\_\_glycolysis\_III\_(from\_glucose)\_g\_\_Odoribacter\_s\_\_Odoribacter\_splanchnic  
ANAGLYCOLYSIS\_PWY\_\_glycolysis\_III\_(from\_glucose)\_g\_\_Pediococcus\_s\_\_Pediococcus\_acidilactici  
ANAGLYCOLYSIS\_PWY\_\_glycolysis\_III\_(from\_glucose)\_g\_\_Pediococcus\_s\_\_Pediococcus\_lolii  
ANAGLYCOLYSIS\_PWY\_\_glycolysis\_III\_(from\_glucose)\_g\_\_Streptococcus\_s\_\_Streptococcus\_austral  
ANAGLYCOLYSIS\_PWY\_\_glycolysis\_III\_(from\_glucose)\_g\_\_Streptococcus\_s\_\_Streptococcus\_mitis\_c

ARGDEG\_PWY\_\_superpathway\_of\_L\_arginine,\_putrescine,\_and\_4\_aminobutanoate\_degradation  
 ARGININE\_SYN4\_PWY\_\_L\_ornithine\_de\_novo\_biosynthesis\_g\_Bacteroides\_s\_Bacteroides\_cell  
 ARGININE\_SYN4\_PWY\_\_L\_ornithine\_de\_novo\_biosynthesis\_g\_Bacteroides\_s\_Bacteroides\_clar  
 ARGININE\_SYN4\_PWY\_\_L\_ornithine\_de\_novo\_biosynthesis\_g\_Bacteroides\_s\_Bacteroides\_faec  
 ARGININE\_SYN4\_PWY\_\_L\_ornithine\_de\_novo\_biosynthesis\_g\_Bacteroides\_s\_Bacteroides\_fine  
 ARGININE\_SYN4\_PWY\_\_L\_ornithine\_de\_novo\_biosynthesis\_g\_Bacteroides\_s\_Bacteroides\_inte  
 ARGININE\_SYN4\_PWY\_\_L\_ornithine\_de\_novo\_biosynthesis\_g\_Bacteroides\_s\_Bacteroides\_mas  
 ARGININE\_SYN4\_PWY\_\_L\_ornithine\_de\_novo\_biosynthesis\_g\_Bacteroides\_s\_Bacteroides\_ova  
 ARGININE\_SYN4\_PWY\_\_L\_ornithine\_de\_novo\_biosynthesis\_g\_Bacteroides\_s\_Bacteroides\_saly  
 ARGININE\_SYN4\_PWY\_\_L\_ornithine\_de\_novo\_biosynthesis\_g\_Bacteroides\_s\_Bacteroides\_sp\_1  
 ARGININE\_SYN4\_PWY\_\_L\_ornithine\_de\_novo\_biosynthesis\_g\_Bacteroides\_s\_Bacteroides\_sp\_2  
 ARGININE\_SYN4\_PWY\_\_L\_ornithine\_de\_novo\_biosynthesis\_g\_Bacteroides\_s\_Bacteroides\_sp\_3  
 ARGININE\_SYN4\_PWY\_\_L\_ornithine\_de\_novo\_biosynthesis\_g\_Bacteroides\_s\_Bacteroides\_sp\_4  
 ARGININE\_SYN4\_PWY\_\_L\_ornithine\_de\_novo\_biosynthesis\_g\_Bacteroides\_s\_Bacteroides\_sp\_5  
 ARGININE\_SYN4\_PWY\_\_L\_ornithine\_de\_novo\_biosynthesis\_g\_Bacteroides\_s\_Bacteroides\_sp\_6  
 ARGININE\_SYN4\_PWY\_\_L\_ornithine\_de\_novo\_biosynthesis\_g\_Bacteroides\_s\_Bacteroides\_sp\_7  
 ARGININE\_SYN4\_PWY\_\_L\_ornithine\_de\_novo\_biosynthesis\_g\_Bacteroides\_s\_Bacteroides\_sp\_8  
 ARGININE\_SYN4\_PWY\_\_L\_ornithine\_de\_novo\_biosynthesis\_g\_Bacteroides\_s\_Bacteroides\_sp\_9  
 ARGININE\_SYN4\_PWY\_\_L\_ornithine\_de\_novo\_biosynthesis\_g\_Bacteroides\_s\_Bacteroides\_sp\_10  
 ARGININE\_SYN4\_PWY\_\_L\_ornithine\_de\_novo\_biosynthesis\_g\_Bacteroides\_s\_Bacteroides\_sp\_11  
 ARGININE\_SYN4\_PWY\_\_L\_ornithine\_de\_novo\_biosynthesis\_g\_Bacteroides\_s\_Bacteroides\_sp\_12  
 ARGININE\_SYN4\_PWY\_\_L\_ornithine\_de\_novo\_biosynthesis\_g\_Bacteroides\_s\_Bacteroides\_sp\_13  
 ARGININE\_SYN4\_PWY\_\_L\_ornithine\_de\_novo\_biosynthesis\_g\_Bacteroides\_s\_Bacteroides\_sp\_14  
 ARGININE\_SYN4\_PWY\_\_L\_ornithine\_de\_novo\_biosynthesis\_g\_Bacteroides\_s\_Bacteroides\_sp\_15  
 ARGININE\_SYN4\_PWY\_\_L\_ornithine\_de\_novo\_biosynthesis\_g\_Bacteroides\_s\_Bacteroides\_sp\_16  
 ARGININE\_SYN4\_PWY\_\_L\_ornithine\_de\_novo\_biosynthesis\_g\_Bacteroides\_s\_Bacteroides\_sp\_17  
 ARGININE\_SYN4\_PWY\_\_L\_ornithine\_de\_novo\_biosynthesis\_g\_Bacteroides\_s\_Bacteroides\_sp\_18  
 ARGININE\_SYN4\_PWY\_\_L\_ornithine\_de\_novo\_biosynthesis\_g\_Bacteroides\_s\_Bacteroides\_sp\_19  
 ARGININE\_SYN4\_PWY\_\_L\_ornithine\_de\_novo\_biosynthesis\_g\_Bacteroides\_s\_Bacteroides\_sp\_20  
 ARGORNPROST\_PWY\_\_arginine,\_ornithine\_and\_proline\_interconversion\_g\_Enterococcus\_s\_Ent  
 ARGSYN\_PWY\_\_L\_arginine\_biosynthesis\_I\_(via\_L\_ornithine)\_g\_Burkholderiales\_noname\_s\_Bur  
 ARGSYN\_PWY\_\_L\_arginine\_biosynthesis\_I\_(via\_L\_ornithine)\_g\_Citrobacter\_s\_Citrobacter\_freur  
 ARGSYN\_PWY\_\_L\_arginine\_biosynthesis\_I\_(via\_L\_ornithine)\_g\_Coprococcus\_s\_Coprococcus\_ca  
 ARGSYN\_PWY\_\_L\_arginine\_biosynthesis\_I\_(via\_L\_ornithine)\_g\_Eubacterium\_s\_Eubacterium\_sir  
 ARGSYN\_PWY\_\_L\_arginine\_biosynthesis\_I\_(via\_L\_ornithine)\_g\_Klebsiella\_s\_Klebsiella\_pneumo  
 ARGSYN\_PWY\_\_L\_arginine\_biosynthesis\_I\_(via\_L\_ornithine)\_g\_Lactococcus\_s\_Lactococcus\_lact  
 ARGSYN\_PWY\_\_L\_arginine\_biosynthesis\_I\_(via\_L\_ornithine)\_g\_Oxalobacter\_s\_Oxalobacter\_fori  
 ARGSYN\_PWY\_\_L\_arginine\_biosynthesis\_I\_(via\_L\_ornithine)\_g\_Parasutterella\_s\_Parasutterella  
 ARGSYN\_PWY\_\_L\_arginine\_biosynthesis\_I\_(via\_L\_ornithine)\_g\_Ruminococcus\_s\_Ruminococcus  
 ARGSYN\_PWY\_\_L\_arginine\_biosynthesis\_I\_(via\_L\_ornithine)\_g\_Veillonella\_s\_Veillonella\_dispar  
 ARGSYN\_PWY\_\_L\_arginine\_biosynthesis\_I\_(via\_L\_ornithine)\_g\_Veillonella\_s\_Veillonella\_parvul  
 ARGSYNBSUB\_PWY\_\_L\_arginine\_biosynthesis\_II\_(acetyl\_cycle)\_g\_Burkholderiales\_noname\_s\_E  
 ARGSYNBSUB\_PWY\_\_L\_arginine\_biosynthesis\_II\_(acetyl\_cycle)\_g\_Coprococcus\_s\_Coprococcus  
 ARGSYNBSUB\_PWY\_\_L\_arginine\_biosynthesis\_II\_(acetyl\_cycle)\_g\_Eubacterium\_s\_Eubacterium  
 ARGSYNBSUB\_PWY\_\_L\_arginine\_biosynthesis\_II\_(acetyl\_cycle)\_g\_Lactococcus\_s\_Lactococcus\_la  
 ARGSYNBSUB\_PWY\_\_L\_arginine\_biosynthesis\_II\_(acetyl\_cycle)\_g\_Oxalobacter\_s\_Oxalobacter\_f  
 ARGSYNBSUB\_PWY\_\_L\_arginine\_biosynthesis\_II\_(acetyl\_cycle)\_g\_Parasutterella\_s\_Parasutere  
 ARGSYNBSUB\_PWY\_\_L\_arginine\_biosynthesis\_II\_(acetyl\_cycle)\_g\_Ruminococcus\_s\_Ruminococ  
 ARO\_PWY\_\_chorismate\_biosynthesis\_I\_g\_Akkermansia\_s\_Akkermansia\_muciniphila  
 ARO\_PWY\_\_chorismate\_biosynthesis\_I\_g\_Alistipes\_s\_Alistipes\_finegoldii  
 ARO\_PWY\_\_chorismate\_biosynthesis\_I\_g\_Alistipes\_s\_Alistipes\_sp\_HGB5  
 ARO\_PWY\_\_chorismate\_biosynthesis\_I\_g\_Anaerostipes\_s\_Anaerostipes\_hadrus  
 ARO\_PWY\_\_chorismate\_biosynthesis\_I\_g\_Anaerotruncus\_s\_Anaerotruncus\_colihominis  
 ARO\_PWY\_\_chorismate\_biosynthesis\_I\_g\_Bacteroides\_s\_Bacteroides\_fragilis  
 ARO\_PWY\_\_chorismate\_biosynthesis\_I\_g\_Blautia\_s\_Blautia\_sp\_KLE\_1732  
 ARO\_PWY\_\_chorismate\_biosynthesis\_I\_g\_Blautia\_s\_Ruminococcus\_gnavus  
 ARO\_PWY\_\_chorismate\_biosynthesis\_I\_g\_Blautia\_s\_Ruminococcus\_obeum



ARO\_PWY\_\_chorismate\_biosynthesis\_I\_g\_\_Burkholderiales\_noname\_s\_\_Burkholderiales\_bacteriu  
 ARO\_PWY\_\_chorismate\_biosynthesis\_I\_g\_\_Butyrivibrio\_s\_\_Butyrivibrio\_crossotus  
 ARO\_PWY\_\_chorismate\_biosynthesis\_I\_g\_\_Citrobacter\_s\_\_Citrobacter\_freundii  
 ARO\_PWY\_\_chorismate\_biosynthesis\_I\_g\_\_Clostridiales\_noname\_s\_\_Clostridiales\_bacterium\_1\_7  
 ARO\_PWY\_\_chorismate\_biosynthesis\_I\_g\_\_Clostridium\_s\_\_Clostridium\_asparagiforme  
 ARO\_PWY\_\_chorismate\_biosynthesis\_I\_g\_\_Clostridium\_s\_\_Clostridium\_bolteae  
 ARO\_PWY\_\_chorismate\_biosynthesis\_I\_g\_\_Clostridium\_s\_\_Clostridium\_clostridioforme  
 ARO\_PWY\_\_chorismate\_biosynthesis\_I\_g\_\_Clostridium\_s\_\_Clostridium\_hathewayi  
 ARO\_PWY\_\_chorismate\_biosynthesis\_I\_g\_\_Clostridium\_s\_\_Clostridium\_sp\_L2\_50  
 ARO\_PWY\_\_chorismate\_biosynthesis\_I\_g\_\_Clostridium\_s\_\_Clostridium\_sp\_SS2\_1  
 ARO\_PWY\_\_chorismate\_biosynthesis\_I\_g\_\_Clostridium\_s\_\_Clostridium\_symbiosum  
 ARO\_PWY\_\_chorismate\_biosynthesis\_I\_g\_\_Dorea\_s\_\_Dorea\_formicigenerans  
 ARO\_PWY\_\_chorismate\_biosynthesis\_I\_g\_\_Dorea\_s\_\_Dorea\_longicatena  
 ARO\_PWY\_\_chorismate\_biosynthesis\_I\_g\_\_Erysipelotrichaceae\_noname\_s\_\_Eubacterium\_biforme  
 ARO\_PWY\_\_chorismate\_biosynthesis\_I\_g\_\_Eubacterium\_s\_\_Eubacterium\_eligens  
 ARO\_PWY\_\_chorismate\_biosynthesis\_I\_g\_\_Eubacterium\_s\_\_Eubacterium\_siraeum  
 ARO\_PWY\_\_chorismate\_biosynthesis\_I\_g\_\_Eubacterium\_s\_\_Eubacterium\_ventriosum  
 ARO\_PWY\_\_chorismate\_biosynthesis\_I\_g\_\_Klebsiella\_s\_\_Klebsiella\_pneumoniae  
 ARO\_PWY\_\_chorismate\_biosynthesis\_I\_g\_\_Lachnospiraceae\_noname\_s\_\_Lachnospiraceae\_bacter  
 ARO\_PWY\_\_chorismate\_biosynthesis\_I\_g\_\_Lachnospiraceae\_noname\_s\_\_Lachnospiraceae\_bacter  
 ARO\_PWY\_\_chorismate\_biosynthesis\_I\_g\_\_Lachnospiraceae\_noname\_s\_\_Lachnospiraceae\_bacter  
 ARO\_PWY\_\_chorismate\_biosynthesis\_I\_g\_\_Lachnospiraceae\_noname\_s\_\_Lachnospiraceae\_bacter  
 ARO\_PWY\_\_chorismate\_biosynthesis\_I\_g\_\_Lactococcus\_s\_\_Lactococcus\_lactis  
 ARO\_PWY\_\_chorismate\_biosynthesis\_I\_g\_\_Parasutterella\_s\_\_Parasutterella\_excrementihominis  
 ARO\_PWY\_\_chorismate\_biosynthesis\_I\_g\_\_Peptostreptococcaceae\_noname\_s\_\_Clostridium\_bartl  
 ARO\_PWY\_\_chorismate\_biosynthesis\_I\_g\_\_Phascolarctobacterium\_s\_\_Phascolarctobacterium\_suc  
 ARO\_PWY\_\_chorismate\_biosynthesis\_I\_g\_\_Propionibacterium\_s\_\_Propionibacterium\_freudenreic  
 ARO\_PWY\_\_chorismate\_biosynthesis\_I\_g\_\_Roseburia\_s\_\_Roseburia\_hominis  
 ARO\_PWY\_\_chorismate\_biosynthesis\_I\_g\_\_Roseburia\_s\_\_Roseburia\_inulinivorans  
 ARO\_PWY\_\_chorismate\_biosynthesis\_I\_g\_\_Ruminococcus\_s\_\_Ruminococcus\_champanellensis  
 ASPASN\_PWY\_\_superpathway\_of\_L\_aspartate\_and\_L\_asparagine\_biosynthesis\_g\_\_Bacteroides\_s  
 ASPASN\_PWY\_\_superpathway\_of\_L\_aspartate\_and\_L\_asparagine\_biosynthesis\_g\_\_Citrobacter\_s  
 ASPASN\_PWY\_\_superpathway\_of\_L\_aspartate\_and\_L\_asparagine\_biosynthesis\_g\_\_Enterobacter  
 ASPASN\_PWY\_\_superpathway\_of\_L\_aspartate\_and\_L\_asparagine\_biosynthesis\_g\_\_Lactobacillus  
 ASPASN\_PWY\_\_superpathway\_of\_L\_aspartate\_and\_L\_asparagine\_biosynthesis\_g\_\_Odoribacter\_s  
 ASPASN\_PWY\_\_superpathway\_of\_L\_aspartate\_and\_L\_asparagine\_biosynthesis\_g\_\_Propionibacter  
 AST\_PWY\_\_L\_arginine\_degradation\_II\_(AST\_pathway)\_unclassified  
 BIOTIN\_BIOSYNTHESIS\_PWY\_\_biotin\_biosynthesis\_I\_g\_\_Citrobacter\_s\_\_Citrobacter\_freundii

BIOTIN\_BIOSYNTHESIS\_PWY\_\_biotin\_biosynthesis\_I\_g\_\_Haemophilus\_s\_\_Haemophilus\_painfluenzae

BIOTIN\_BIOSYNTHESIS\_PWY\_\_biotin\_biosynthesis\_I\_g\_\_Klebsiella\_s\_\_Klebsiella\_pneumoniae

BRANCHED\_CHAIN\_AA\_SYN\_PWY\_\_superpathway\_of\_branched\_amino\_acid\_biosynthesis\_g\_\_Akkermansia\_s\_\_Akkermansia\_muciniphila

BRANCHED\_CHAIN\_AA\_SYN\_PWY\_\_superpathway\_of\_branched\_amino\_acid\_biosynthesis\_g\_\_Anaerostipes\_s\_\_Anaerostipes\_hadrus

BRANCHED\_CHAIN\_AA\_SYN\_PWY\_\_superpathway\_of\_branched\_amino\_acid\_biosynthesis\_g\_\_Blautia\_s\_\_Blautia\_oxofermentans

BRANCHED\_CHAIN\_AA\_SYN\_PWY\_\_superpathway\_of\_branched\_amino\_acid\_biosynthesis\_g\_\_Blautia\_s\_\_Blautia\_oxofermentans

BRANCHED\_CHAIN\_AA\_SYN\_PWY\_\_superpathway\_of\_branched\_amino\_acid\_biosynthesis\_g\_\_Clostridium\_s\_\_Clostridium\_thermophilum

BRANCHED\_CHAIN\_AA\_SYN\_PWY\_\_superpathway\_of\_branched\_amino\_acid\_biosynthesis\_g\_\_Clostridium\_s\_\_Clostridium\_thermophilum

BRANCHED\_CHAIN\_AA\_SYN\_PWY\_\_superpathway\_of\_branched\_amino\_acid\_biosynthesis\_g\_\_Clostridium\_s\_\_Clostridium\_thermophilum

BRANCHED\_CHAIN\_AA\_SYN\_PWY\_\_superpathway\_of\_branched\_amino\_acid\_biosynthesis\_g\_\_Eubacterium\_s\_\_Eubacterium\_thermophilum

BRANCHED\_CHAIN\_AA\_SYN\_PWY\_\_superpathway\_of\_branched\_amino\_acid\_biosynthesis\_g\_\_Fusobacterium\_s\_\_Fusobacterium\_nucleatum

BRANCHED\_CHAIN\_AA\_SYN\_PWY\_\_superpathway\_of\_branched\_amino\_acid\_biosynthesis\_g\_\_Odoribacter\_s\_\_Odoribacter\_splanchnicus

BRANCHED\_CHAIN\_AA\_SYN\_PWY\_\_superpathway\_of\_branched\_amino\_acid\_biosynthesis\_g\_\_Odoribacter\_s\_\_Odoribacter\_splanchnicus

BRANCHED\_CHAIN\_AA\_SYN\_PWY\_\_superpathway\_of\_branched\_amino\_acid\_biosynthesis\_g\_\_Primeria\_s\_\_Primeria\_oxofermentans

BRANCHED\_CHAIN\_AA\_SYN\_PWY\_\_superpathway\_of\_branched\_amino\_acid\_biosynthesis\_g\_\_Ruminococcus\_s\_\_Ruminococcus\_torques

BRANCHED\_CHAIN\_AA\_SYN\_PWY\_\_superpathway\_of\_branched\_amino\_acid\_biosynthesis\_g\_\_Streptococcus\_s\_\_Streptococcus\_thermophilus

BRANCHED\_CHAIN\_AA\_SYN\_PWY\_\_superpathway\_of\_branched\_amino\_acid\_biosynthesis\_g\_\_Streptococcus\_s\_\_Streptococcus\_thermophilus

BRANCHED\_CHAIN\_AA\_SYN\_PWY\_\_superpathway\_of\_branched\_amino\_acid\_biosynthesis\_g\_\_Sulfolobus\_s\_\_Sulfolobus\_solfataricus

CALVIN\_PWY\_\_Calvin\_Benson\_Bassham\_cycle\_g\_\_Anaerostipes\_s\_\_Anaerostipes\_hadrus

CALVIN\_PWY\_\_Calvin\_Benson\_Bassham\_cycle\_g\_\_Blautia\_s\_\_Blautia\_oxofermentans

CALVIN\_PWY\_\_Calvin\_Benson\_Bassham\_cycle\_g\_\_Citrobacter\_s\_\_Citrobacter\_freundii

CALVIN\_PWY\_\_Calvin\_Benson\_Bassham\_cycle\_g\_\_Clostridium\_s\_\_Clostridium\_asparagiforme

CALVIN\_PWY\_\_Calvin\_Benson\_Bassham\_cycle\_g\_\_Clostridium\_s\_\_Clostridium\_sp\_SS2\_1

CALVIN\_PWY\_\_Calvin\_Benson\_Bassham\_cycle\_g\_\_Coprotherobacter\_s\_\_Coprotherobacter\_aurantiacus

CALVIN\_PWY\_\_Calvin\_Benson\_Bassham\_cycle\_g\_\_Enterobacter\_s\_\_Enterobacter\_cloacae

CALVIN\_PWY\_\_Calvin\_Benson\_Bassham\_cycle\_g\_\_Fusobacterium\_s\_\_Fusobacterium\_nucleatum

CALVIN\_PWY\_\_Calvin\_Benson\_Bassham\_cycle\_g\_\_Klebsiella\_s\_\_Klebsiella\_pneumoniae

CALVIN\_PWY\_\_Calvin\_Benson\_Bassham\_cycle\_g\_\_Lachnospiraceae\_noname\_s\_\_Lachnospiraceae

CALVIN\_PWY\_\_Calvin\_Benson\_Bassham\_cycle\_g\_\_Lactobacillus\_s\_\_Lactobacillus\_rhamnosus

CALVIN\_PWY\_\_Calvin\_Benson\_Bassham\_cycle\_g\_\_Odoribacter\_s\_\_Odoribacter\_splanchnicus

CALVIN\_PWY\_\_Calvin\_Benson\_Bassham\_cycle\_g\_\_Peptostreptococcaceae\_noname\_s\_\_Clostridium

CATECHOL\_ORTHO\_CLEAVAGE\_PWY\_\_catechol\_degradation\_to\_beta\_ketoadipate

CENTFERM\_PWY\_\_pyruvate\_fermentation\_to\_butanoate\_unclassified

COA\_PWY\_1\_\_coenzyme\_A\_biosynthesis\_II\_(mammalian)\_g\_\_Actinomyces\_s\_\_Actinomyces\_gracilis

COA\_PWY\_1\_\_coenzyme\_A\_biosynthesis\_II\_(mammalian)\_g\_\_Adlercreutzia\_s\_\_Adlercreutzia\_equisetorum

COA\_PWY\_1\_\_coenzyme\_A\_biosynthesis\_II\_(mammalian)\_g\_\_Akkermansia\_s\_\_Akkermansia\_muciniphila

COA\_PWY\_1\_\_coenzyme\_A\_biosynthesis\_II\_(mammalian)\_g\_\_Alistipes\_s\_\_Alistipes\_finegoldii

COA\_PWY\_1\_\_coenzyme\_A\_biosynthesis\_II\_(mammalian)\_g\_\_Alistipes\_s\_\_Alistipes\_indistinctus

COA\_PWY\_1\_\_coenzyme\_A\_biosynthesis\_II\_(mammalian)\_g\_\_Alistipes\_s\_\_Alistipes\_putredinis

COA\_PWY\_1\_\_coenzyme\_A\_biosynthesis\_II\_(mammalian)\_g\_\_Anaerofustis\_s\_\_Anaerofustis\_sterilis

COA\_PWY\_1\_\_coenzyme\_A\_biosynthesis\_II\_(mammalian)\_g\_\_Anaerostipes\_s\_\_Anaerostipes\_hadrus

COA\_PWY\_1\_\_coenzyme\_A\_biosynthesis\_II\_(mammalian)\_g\_\_Anaerotruncus\_s\_\_Anaerotruncus\_anaerobutylicus

COA\_PWY\_1\_\_coenzyme\_A\_biosynthesis\_II\_(mammalian)\_g\_\_Bacteroides\_s\_\_Bacteroides\_cellulosilyticus

COA\_PWY\_1\_\_coenzyme\_A\_biosynthesis\_II\_(mammalian)\_g\_\_Bacteroides\_s\_\_Bacteroides\_coprotherobacter

COA\_PWY\_1\_\_coenzyme\_A\_biosynthesis\_II\_(mammalian)\_g\_\_Bacteroides\_s\_\_Bacteroides\_dorei  
COA\_PWY\_1\_\_coenzyme\_A\_biosynthesis\_II\_(mammalian)\_g\_\_Bacteroides\_s\_\_Bacteroides\_egger  
COA\_PWY\_1\_\_coenzyme\_A\_biosynthesis\_II\_(mammalian)\_g\_\_Bacteroides\_s\_\_Bacteroides\_faecis  
COA\_PWY\_1\_\_coenzyme\_A\_biosynthesis\_II\_(mammalian)\_g\_\_Bacteroides\_s\_\_Bacteroides\_finegc  
COA\_PWY\_1\_\_coenzyme\_A\_biosynthesis\_II\_(mammalian)\_g\_\_Bacteroides\_s\_\_Bacteroides\_intesti  
COA\_PWY\_1\_\_coenzyme\_A\_biosynthesis\_II\_(mammalian)\_g\_\_Bacteroides\_s\_\_Bacteroides\_ovatu  
COA\_PWY\_1\_\_coenzyme\_A\_biosynthesis\_II\_(mammalian)\_g\_\_Bacteroides\_s\_\_Bacteroides\_salyer  
COA\_PWY\_1\_\_coenzyme\_A\_biosynthesis\_II\_(mammalian)\_g\_\_Bacteroides\_s\_\_Bacteroides\_sp\_1\_\_  
COA\_PWY\_1\_\_coenzyme\_A\_biosynthesis\_II\_(mammalian)\_g\_\_Bacteroides\_s\_\_Bacteroides\_sp\_1\_\_  
COA\_PWY\_1\_\_coenzyme\_A\_biosynthesis\_II\_(mammalian)\_g\_\_Bacteroides\_s\_\_Bacteroides\_sp\_2\_\_  
COA\_PWY\_1\_\_coenzyme\_A\_biosynthesis\_II\_(mammalian)\_g\_\_Bacteroides\_s\_\_Bacteroides\_sp\_2\_\_  
COA\_PWY\_1\_\_coenzyme\_A\_biosynthesis\_II\_(mammalian)\_g\_\_Bacteroides\_s\_\_Bacteroides\_sp\_2\_\_  
COA\_PWY\_1\_\_coenzyme\_A\_biosynthesis\_II\_(mammalian)\_g\_\_Bacteroides\_s\_\_Bacteroides\_sp\_3\_\_  
COA\_PWY\_1\_\_coenzyme\_A\_biosynthesis\_II\_(mammalian)\_g\_\_Bacteroides\_s\_\_Bacteroides\_sp\_3\_\_  
COA\_PWY\_1\_\_coenzyme\_A\_biosynthesis\_II\_(mammalian)\_g\_\_Bacteroides\_s\_\_Bacteroides\_sp\_3\_\_  
COA\_PWY\_1\_\_coenzyme\_A\_biosynthesis\_II\_(mammalian)\_g\_\_Bacteroides\_s\_\_Bacteroides\_sp\_3\_\_  
COA\_PWY\_1\_\_coenzyme\_A\_biosynthesis\_II\_(mammalian)\_g\_\_Bacteroides\_s\_\_Bacteroides\_sp\_3\_\_  
COA\_PWY\_1\_\_coenzyme\_A\_biosynthesis\_II\_(mammalian)\_g\_\_Bacteroides\_s\_\_Bacteroides\_sp\_3\_\_  
COA\_PWY\_1\_\_coenzyme\_A\_biosynthesis\_II\_(mammalian)\_g\_\_Bacteroides\_s\_\_Bacteroides\_sp\_4\_\_  
COA\_PWY\_1\_\_coenzyme\_A\_biosynthesis\_II\_(mammalian)\_g\_\_Bacteroides\_s\_\_Bacteroides\_sp\_9\_\_  
COA\_PWY\_1\_\_coenzyme\_A\_biosynthesis\_II\_(mammalian)\_g\_\_Bacteroides\_s\_\_Bacteroides\_sp\_D2  
COA\_PWY\_1\_\_coenzyme\_A\_biosynthesis\_II\_(mammalian)\_g\_\_Bacteroides\_s\_\_Bacteroides\_thetai  
COA\_PWY\_1\_\_coenzyme\_A\_biosynthesis\_II\_(mammalian)\_g\_\_Bacteroides\_s\_\_Bacteroides\_unifor  
COA\_PWY\_1\_\_coenzyme\_A\_biosynthesis\_II\_(mammalian)\_g\_\_Bacteroides\_s\_\_Bacteroides\_xylani  
COA\_PWY\_1\_\_coenzyme\_A\_biosynthesis\_II\_(mammalian)\_g\_\_Barnesiella\_s\_\_Barnesiella\_intestin  
COA\_PWY\_1\_\_coenzyme\_A\_biosynthesis\_II\_(mammalian)\_g\_\_Bifidobacterium\_s\_\_Bifidobacteriur  
COA\_PWY\_1\_\_coenzyme\_A\_biosynthesis\_II\_(mammalian)\_g\_\_Bifidobacterium\_s\_\_Bifidobacteriur  
COA\_PWY\_1\_\_coenzyme\_A\_biosynthesis\_II\_(mammalian)\_g\_\_Bifidobacterium\_s\_\_Bifidobacteriur  
COA\_PWY\_1\_\_coenzyme\_A\_biosynthesis\_II\_(mammalian)\_g\_\_Bifidobacterium\_s\_\_Bifidobacteriur  
COA\_PWY\_1\_\_coenzyme\_A\_biosynthesis\_II\_(mammalian)\_g\_\_Bifidobacterium\_s\_\_Bifidobacteriur  
COA\_PWY\_1\_\_coenzyme\_A\_biosynthesis\_II\_(mammalian)\_g\_\_Blautia\_s\_\_Blautia\_hydrogenotropl  
COA\_PWY\_1\_\_coenzyme\_A\_biosynthesis\_II\_(mammalian)\_g\_\_Blautia\_s\_\_Blautia\_sp\_KLE\_1732  
COA\_PWY\_1\_\_coenzyme\_A\_biosynthesis\_II\_(mammalian)\_g\_\_Blautia\_s\_\_Ruminococcus\_gnavus  
COA\_PWY\_1\_\_coenzyme\_A\_biosynthesis\_II\_(mammalian)\_g\_\_Blautia\_s\_\_Ruminococcus\_obeum  
COA\_PWY\_1\_\_coenzyme\_A\_biosynthesis\_II\_(mammalian)\_g\_\_Butyrivibrio\_s\_\_Butyrivibrio\_crossc  
COA\_PWY\_1\_\_coenzyme\_A\_biosynthesis\_II\_(mammalian)\_g\_\_Citrobacter\_s\_\_Citrobacter\_freundi  
COA\_PWY\_1\_\_coenzyme\_A\_biosynthesis\_II\_(mammalian)\_g\_\_Clostridiales\_noname\_s\_\_Clostridia  
COA\_PWY\_1\_\_coenzyme\_A\_biosynthesis\_II\_(mammalian)\_g\_\_Clostridium\_s\_\_Clostridium\_boltea  
COA\_PWY\_1\_\_coenzyme\_A\_biosynthesis\_II\_(mammalian)\_g\_\_Clostridium\_s\_\_Clostridium\_citroni  
COA\_PWY\_1\_\_coenzyme\_A\_biosynthesis\_II\_(mammalian)\_g\_\_Clostridium\_s\_\_Clostridium\_clostri  
COA\_PWY\_1\_\_coenzyme\_A\_biosynthesis\_II\_(mammalian)\_g\_\_Clostridium\_s\_\_Clostridium\_hathev  
COA\_PWY\_1\_\_coenzyme\_A\_biosynthesis\_II\_(mammalian)\_g\_\_Clostridium\_s\_\_Clostridium\_leptun  
COA\_PWY\_1\_\_coenzyme\_A\_biosynthesis\_II\_(mammalian)\_g\_\_Clostridium\_s\_\_Clostridium\_perfrir  
COA\_PWY\_1\_\_coenzyme\_A\_biosynthesis\_II\_(mammalian)\_g\_\_Clostridium\_s\_\_Clostridium\_sp\_SS2  
COA\_PWY\_1\_\_coenzyme\_A\_biosynthesis\_II\_(mammalian)\_g\_\_Collinsella\_s\_\_Collinsella\_intestinal  
COA\_PWY\_1\_\_coenzyme\_A\_biosynthesis\_II\_(mammalian)\_g\_\_Collinsella\_s\_\_Collinsella\_tanakaei  
COA\_PWY\_1\_\_coenzyme\_A\_biosynthesis\_II\_(mammalian)\_g\_\_Copro bacter\_s\_\_Copro bacter\_fastid  
COA\_PWY\_1\_\_coenzyme\_A\_biosynthesis\_II\_(mammalian)\_g\_\_Copro coccus\_s\_\_Copro coccus\_catu  
COA\_PWY\_1\_\_coenzyme\_A\_biosynthesis\_II\_(mammalian)\_g\_\_Copro coccus\_s\_\_Copro coccus\_euta

COA\_PWY\_1\_\_coenzyme\_A\_biosynthesis\_II\_(mammalian)\_g\_Dialister\_s\_Dialister\_invisus  
COA\_PWY\_1\_\_coenzyme\_A\_biosynthesis\_II\_(mammalian)\_g\_Dorea\_s\_Dorea\_formicigenerans  
COA\_PWY\_1\_\_coenzyme\_A\_biosynthesis\_II\_(mammalian)\_g\_Eggerthella\_s\_Eggerthella\_lenta  
COA\_PWY\_1\_\_coenzyme\_A\_biosynthesis\_II\_(mammalian)\_g\_Eggerthella\_s\_Eggerthella\_sp\_1\_3  
COA\_PWY\_1\_\_coenzyme\_A\_biosynthesis\_II\_(mammalian)\_g\_Eggerthella\_s\_Eggerthella\_sp\_HG  
COA\_PWY\_1\_\_coenzyme\_A\_biosynthesis\_II\_(mammalian)\_g\_Enterococcus\_s\_Enterococcus\_fae  
COA\_PWY\_1\_\_coenzyme\_A\_biosynthesis\_II\_(mammalian)\_g\_Enterococcus\_s\_Enterococcus\_fae  
COA\_PWY\_1\_\_coenzyme\_A\_biosynthesis\_II\_(mammalian)\_g\_Erysipelotrichaceae\_noname\_s\_Cl  
COA\_PWY\_1\_\_coenzyme\_A\_biosynthesis\_II\_(mammalian)\_g\_Erysipelotrichaceae\_noname\_s\_Er  
COA\_PWY\_1\_\_coenzyme\_A\_biosynthesis\_II\_(mammalian)\_g\_Erysipelotrichaceae\_noname\_s\_Er  
COA\_PWY\_1\_\_coenzyme\_A\_biosynthesis\_II\_(mammalian)\_g\_Erysipelotrichaceae\_noname\_s\_Eu  
COA\_PWY\_1\_\_coenzyme\_A\_biosynthesis\_II\_(mammalian)\_g\_Eubacterium\_s\_Eubacterium\_elige  
COA\_PWY\_1\_\_coenzyme\_A\_biosynthesis\_II\_(mammalian)\_g\_Eubacterium\_s\_Eubacterium\_halli  
COA\_PWY\_1\_\_coenzyme\_A\_biosynthesis\_II\_(mammalian)\_g\_Eubacterium\_s\_Eubacterium\_sira  
COA\_PWY\_1\_\_coenzyme\_A\_biosynthesis\_II\_(mammalian)\_g\_Eubacterium\_s\_Eubacterium\_sp\_3  
COA\_PWY\_1\_\_coenzyme\_A\_biosynthesis\_II\_(mammalian)\_g\_Eubacterium\_s\_Eubacterium\_vent  
COA\_PWY\_1\_\_coenzyme\_A\_biosynthesis\_II\_(mammalian)\_g\_Fusobacterium\_s\_Fusobacterium  
COA\_PWY\_1\_\_coenzyme\_A\_biosynthesis\_II\_(mammalian)\_g\_Gemella\_s\_Gemella\_sanguinis  
COA\_PWY\_1\_\_coenzyme\_A\_biosynthesis\_II\_(mammalian)\_g\_Gordonibacter\_s\_Gordonibacter\_I  
COA\_PWY\_1\_\_coenzyme\_A\_biosynthesis\_II\_(mammalian)\_g\_Holdemania\_s\_Holdemania\_filifor  
COA\_PWY\_1\_\_coenzyme\_A\_biosynthesis\_II\_(mammalian)\_g\_Klebsiella\_s\_Klebsiella\_pneumoni  
COA\_PWY\_1\_\_coenzyme\_A\_biosynthesis\_II\_(mammalian)\_g\_Lachnospiraceae\_noname\_s\_Lach  
COA\_PWY\_1\_\_coenzyme\_A\_biosynthesis\_II\_(mammalian)\_g\_Lachnospiraceae\_noname\_s\_Lach  
COA\_PWY\_1\_\_coenzyme\_A\_biosynthesis\_II\_(mammalian)\_g\_Lachnospiraceae\_noname\_s\_Lach  
COA\_PWY\_1\_\_coenzyme\_A\_biosynthesis\_II\_(mammalian)\_g\_Lachnospiraceae\_noname\_s\_Lach  
COA\_PWY\_1\_\_coenzyme\_A\_biosynthesis\_II\_(mammalian)\_g\_Lachnospiraceae\_noname\_s\_Lach  
COA\_PWY\_1\_\_coenzyme\_A\_biosynthesis\_II\_(mammalian)\_g\_Lachnospiraceae\_noname\_s\_Lach  
COA\_PWY\_1\_\_coenzyme\_A\_biosynthesis\_II\_(mammalian)\_g\_Lachnospiraceae\_noname\_s\_Lach  
COA\_PWY\_1\_\_coenzyme\_A\_biosynthesis\_II\_(mammalian)\_g\_Lachnospiraceae\_noname\_s\_Lach  
COA\_PWY\_1\_\_coenzyme\_A\_biosynthesis\_II\_(mammalian)\_g\_Lactobacillus\_s\_Lactobacillus\_case  
COA\_PWY\_1\_\_coenzyme\_A\_biosynthesis\_II\_(mammalian)\_g\_Lactobacillus\_s\_Lactobacillus\_fern  
COA\_PWY\_1\_\_coenzyme\_A\_biosynthesis\_II\_(mammalian)\_g\_Odoribacter\_s\_Odoribacter\_laneu  
COA\_PWY\_1\_\_coenzyme\_A\_biosynthesis\_II\_(mammalian)\_g\_Odoribacter\_s\_Odoribacter\_splan  
COA\_PWY\_1\_\_coenzyme\_A\_biosynthesis\_II\_(mammalian)\_g\_Oxalobacter\_s\_Oxalobacter\_formi  
COA\_PWY\_1\_\_coenzyme\_A\_biosynthesis\_II\_(mammalian)\_g\_Parabacteroides\_s\_Parabacteroid  
COA\_PWY\_1\_\_coenzyme\_A\_biosynthesis\_II\_(mammalian)\_g\_Parabacteroides\_s\_Parabacteroid  
COA\_PWY\_1\_\_coenzyme\_A\_biosynthesis\_II\_(mammalian)\_g\_Parabacteroides\_s\_Parabacteroid  
COA\_PWY\_1\_\_coenzyme\_A\_biosynthesis\_II\_(mammalian)\_g\_Parabacteroides\_s\_Parabacteroid  
COA\_PWY\_1\_\_coenzyme\_A\_biosynthesis\_II\_(mammalian)\_g\_Parabacteroides\_s\_Parabacteroid  
COA\_PWY\_1\_\_coenzyme\_A\_biosynthesis\_II\_(mammalian)\_g\_Parabacteroides\_s\_Parabacteroid  
COA\_PWY\_1\_\_coenzyme\_A\_biosynthesis\_II\_(mammalian)\_g\_Parabacteroides\_s\_Parabacteroid  
COA\_PWY\_1\_\_coenzyme\_A\_biosynthesis\_II\_(mammalian)\_g\_Paraprevotella\_s\_Paraprevotella  
COA\_PWY\_1\_\_coenzyme\_A\_biosynthesis\_II\_(mammalian)\_g\_Parasutterella\_s\_Parasutterella\_e  
COA\_PWY\_1\_\_coenzyme\_A\_biosynthesis\_II\_(mammalian)\_g\_Pediococcus\_s\_Pediococcus\_acidil  
COA\_PWY\_1\_\_coenzyme\_A\_biosynthesis\_II\_(mammalian)\_g\_Pediococcus\_s\_Pediococcus\_lolii  
COA\_PWY\_1\_\_coenzyme\_A\_biosynthesis\_II\_(mammalian)\_g\_Peptostreptococcaceae\_noname\_s  
COA\_PWY\_1\_\_coenzyme\_A\_biosynthesis\_II\_(mammalian)\_g\_Phascalactobacterium\_s\_Phascal  
COA\_PWY\_1\_\_coenzyme\_A\_biosynthesis\_II\_(mammalian)\_g\_Roseburia\_s\_Roseburia\_hominis

COA\_PWY\_1\_\_coenzyme\_A\_biosynthesis\_II\_(mammalian)\_g\_Roseburia\_s\_Roseburia\_inulinivor  
COA\_PWY\_1\_\_coenzyme\_A\_biosynthesis\_II\_(mammalian)\_g\_Rothia\_s\_Rothia\_mucilaginoso  
COA\_PWY\_1\_\_coenzyme\_A\_biosynthesis\_II\_(mammalian)\_g\_Ruminococcus\_s\_Ruminococcus\_c  
COA\_PWY\_1\_\_coenzyme\_A\_biosynthesis\_II\_(mammalian)\_g\_Ruminococcus\_s\_Ruminococcus\_l  
COA\_PWY\_1\_\_coenzyme\_A\_biosynthesis\_II\_(mammalian)\_g\_Ruminococcus\_s\_Ruminococcus\_s  
COA\_PWY\_1\_\_coenzyme\_A\_biosynthesis\_II\_(mammalian)\_g\_Slackia\_s\_Slackia\_piriformis  
COA\_PWY\_1\_\_coenzyme\_A\_biosynthesis\_II\_(mammalian)\_g\_Streptococcus\_s\_Streptococcus\_ar  
COA\_PWY\_1\_\_coenzyme\_A\_biosynthesis\_II\_(mammalian)\_g\_Streptococcus\_s\_Streptococcus\_r  
COA\_PWY\_1\_\_coenzyme\_A\_biosynthesis\_II\_(mammalian)\_g\_Subdoligranulum\_s\_Subdoligranul  
COA\_PWY\_1\_\_coenzyme\_A\_biosynthesis\_II\_(mammalian)\_g\_Veillonella\_s\_Veillonella\_dispar  
COA\_PWY\_1\_\_coenzyme\_A\_biosynthesis\_II\_(mammalian)\_g\_Veillonella\_s\_Veillonella\_parvula  
COA\_PWY\_\_coenzyme\_A\_biosynthesis\_I\_g\_Akkermansia\_s\_Akkermansia\_muciniphila  
COA\_PWY\_\_coenzyme\_A\_biosynthesis\_I\_g\_Anaerofustis\_s\_Anaerofustis\_stercorihominis  
COA\_PWY\_\_coenzyme\_A\_biosynthesis\_I\_g\_Anaerostipes\_s\_Anaerostipes\_hadrus  
COA\_PWY\_\_coenzyme\_A\_biosynthesis\_I\_g\_Anaerotruncus\_s\_Anaerotruncus\_colihominis  
COA\_PWY\_\_coenzyme\_A\_biosynthesis\_I\_g\_Bacteroides\_s\_Bacteroides\_ovatus  
COA\_PWY\_\_coenzyme\_A\_biosynthesis\_I\_g\_Bacteroides\_s\_Bacteroides\_sp\_1\_1\_30  
COA\_PWY\_\_coenzyme\_A\_biosynthesis\_I\_g\_Bacteroides\_s\_Bacteroides\_sp\_2\_1\_22  
COA\_PWY\_\_coenzyme\_A\_biosynthesis\_I\_g\_Bacteroides\_s\_Bacteroides\_sp\_2\_2\_4  
COA\_PWY\_\_coenzyme\_A\_biosynthesis\_I\_g\_Bacteroides\_s\_Bacteroides\_sp\_3\_1\_23  
COA\_PWY\_\_coenzyme\_A\_biosynthesis\_I\_g\_Bacteroides\_s\_Bacteroides\_xylanisolvens  
COA\_PWY\_\_coenzyme\_A\_biosynthesis\_I\_g\_Bifidobacterium\_s\_Bifidobacterium\_dentium  
COA\_PWY\_\_coenzyme\_A\_biosynthesis\_I\_g\_Citrobacter\_s\_Citrobacter\_freundii  
COA\_PWY\_\_coenzyme\_A\_biosynthesis\_I\_g\_Clostridiales\_noname\_s\_Clostridiales\_bacterium\_1  
COA\_PWY\_\_coenzyme\_A\_biosynthesis\_I\_g\_Clostridium\_s\_Clostridium\_sp\_SS2\_1  
COA\_PWY\_\_coenzyme\_A\_biosynthesis\_I\_g\_Coprococcus\_s\_Coprococcus\_eutactus  
COA\_PWY\_\_coenzyme\_A\_biosynthesis\_I\_g\_Eggerthella\_s\_Eggerthella\_lenta  
COA\_PWY\_\_coenzyme\_A\_biosynthesis\_I\_g\_Eggerthella\_s\_Eggerthella\_sp\_1\_3\_56FAA  
COA\_PWY\_\_coenzyme\_A\_biosynthesis\_I\_g\_Eggerthella\_s\_Eggerthella\_sp\_HGA1  
COA\_PWY\_\_coenzyme\_A\_biosynthesis\_I\_g\_Enterococcus\_s\_Enterococcus\_faecium  
COA\_PWY\_\_coenzyme\_A\_biosynthesis\_I\_g\_Erysipelotrichaceae\_noname\_s\_Clostridium\_spirofo  
COA\_PWY\_\_coenzyme\_A\_biosynthesis\_I\_g\_Eubacterium\_s\_Eubacterium\_ventriosum  
COA\_PWY\_\_coenzyme\_A\_biosynthesis\_I\_g\_Lachnospiraceae\_noname\_s\_Lachnospiraceae\_bact  
COA\_PWY\_\_coenzyme\_A\_biosynthesis\_I\_g\_Odoribacter\_s\_Odoribacter\_splanchnicus  
COA\_PWY\_\_coenzyme\_A\_biosynthesis\_I\_g\_Oxalobacter\_s\_Oxalobacter\_formigenes  
COA\_PWY\_\_coenzyme\_A\_biosynthesis\_I\_g\_Pediococcus\_s\_Pediococcus\_acidilactici  
COA\_PWY\_\_coenzyme\_A\_biosynthesis\_I\_g\_Pediococcus\_s\_Pediococcus\_lolii  
COA\_PWY\_\_coenzyme\_A\_biosynthesis\_I\_g\_Phascalactobacterium\_s\_Phascalactobacterium\_s  
COA\_PWY\_\_coenzyme\_A\_biosynthesis\_I\_g\_Streptococcus\_s\_Streptococcus\_australis  
COA\_PWY\_\_coenzyme\_A\_biosynthesis\_I\_g\_Streptococcus\_s\_Streptococcus\_mitis\_oralis\_pneum  
COA\_PWY\_\_coenzyme\_A\_biosynthesis\_I\_g\_Veillonella\_s\_Veillonella\_dispar  
COA\_PWY\_\_coenzyme\_A\_biosynthesis\_I\_g\_Veillonella\_s\_Veillonella\_parvula  
COBALSYN\_PWY\_\_adenosylcobalamin\_salvage\_from\_cobinamide\_I\_g\_Blautia\_s\_Blautia\_sp\_KLF  
COBALSYN\_PWY\_\_adenosylcobalamin\_salvage\_from\_cobinamide\_I\_g\_Blautia\_s\_Ruminococcus  
COBALSYN\_PWY\_\_adenosylcobalamin\_salvage\_from\_cobinamide\_I\_g\_Citrobacter\_s\_Citrobacte  
COBALSYN\_PWY\_\_adenosylcobalamin\_salvage\_from\_cobinamide\_I\_g\_Coprococcus\_s\_Coprococ  
COBALSYN\_PWY\_\_adenosylcobalamin\_salvage\_from\_cobinamide\_I\_g\_Phascalactobacterium\_s

COBALSYN\_PWY\_\_adenosylcobalamin\_salvage\_from\_cobinamide\_l\_g\_\_Roseburia\_s\_\_Roseburia\_i  
COBALSYN\_PWY\_\_adenosylcobalamin\_salvage\_from\_cobinamide\_l\_g\_\_Ruminococcus\_s\_\_Ruminc  
COMPLETE\_ARO\_PWY\_\_superpathway\_of\_aromatic\_amino\_acid\_biosynthesis\_g\_\_Akkermansia\_s  
COMPLETE\_ARO\_PWY\_\_superpathway\_of\_aromatic\_amino\_acid\_biosynthesis\_g\_\_Anaerostipes\_s  
COMPLETE\_ARO\_PWY\_\_superpathway\_of\_aromatic\_amino\_acid\_biosynthesis\_g\_\_Bacteroides\_s  
COMPLETE\_ARO\_PWY\_\_superpathway\_of\_aromatic\_amino\_acid\_biosynthesis\_g\_\_Blautia\_s\_\_Blau  
COMPLETE\_ARO\_PWY\_\_superpathway\_of\_aromatic\_amino\_acid\_biosynthesis\_g\_\_Blautia\_s\_\_Run  
COMPLETE\_ARO\_PWY\_\_superpathway\_of\_aromatic\_amino\_acid\_biosynthesis\_g\_\_Blautia\_s\_\_Run  
COMPLETE\_ARO\_PWY\_\_superpathway\_of\_aromatic\_amino\_acid\_biosynthesis\_g\_\_Butyrivibrio\_s\_\_  
COMPLETE\_ARO\_PWY\_\_superpathway\_of\_aromatic\_amino\_acid\_biosynthesis\_g\_\_Citrobacter\_s\_\_  
COMPLETE\_ARO\_PWY\_\_superpathway\_of\_aromatic\_amino\_acid\_biosynthesis\_g\_\_Clostridiales\_n  
COMPLETE\_ARO\_PWY\_\_superpathway\_of\_aromatic\_amino\_acid\_biosynthesis\_g\_\_Clostridium\_s\_\_  
COMPLETE\_ARO\_PWY\_\_superpathway\_of\_aromatic\_amino\_acid\_biosynthesis\_g\_\_Clostridium\_s\_\_  
COMPLETE\_ARO\_PWY\_\_superpathway\_of\_aromatic\_amino\_acid\_biosynthesis\_g\_\_Clostridium\_s\_\_  
COMPLETE\_ARO\_PWY\_\_superpathway\_of\_aromatic\_amino\_acid\_biosynthesis\_g\_\_Clostridium\_s\_\_  
COMPLETE\_ARO\_PWY\_\_superpathway\_of\_aromatic\_amino\_acid\_biosynthesis\_g\_\_Clostridium\_s\_\_  
COMPLETE\_ARO\_PWY\_\_superpathway\_of\_aromatic\_amino\_acid\_biosynthesis\_g\_\_Clostridium\_s\_\_  
COMPLETE\_ARO\_PWY\_\_superpathway\_of\_aromatic\_amino\_acid\_biosynthesis\_g\_\_Clostridium\_s\_\_  
COMPLETE\_ARO\_PWY\_\_superpathway\_of\_aromatic\_amino\_acid\_biosynthesis\_g\_\_Clostridium\_s\_\_  
COMPLETE\_ARO\_PWY\_\_superpathway\_of\_aromatic\_amino\_acid\_biosynthesis\_g\_\_Eubacterium\_s\_\_  
COMPLETE\_ARO\_PWY\_\_superpathway\_of\_aromatic\_amino\_acid\_biosynthesis\_g\_\_Klebsiella\_s\_\_K  
COMPLETE\_ARO\_PWY\_\_superpathway\_of\_aromatic\_amino\_acid\_biosynthesis\_g\_\_Lachnospiracea  
COMPLETE\_ARO\_PWY\_\_superpathway\_of\_aromatic\_amino\_acid\_biosynthesis\_g\_\_Lachnospiracea  
COMPLETE\_ARO\_PWY\_\_superpathway\_of\_aromatic\_amino\_acid\_biosynthesis\_g\_\_Lachnospiracea  
COMPLETE\_ARO\_PWY\_\_superpathway\_of\_aromatic\_amino\_acid\_biosynthesis\_g\_\_Lachnospiracea  
COMPLETE\_ARO\_PWY\_\_superpathway\_of\_aromatic\_amino\_acid\_biosynthesis\_g\_\_Lactococcus\_s\_\_  
COMPLETE\_ARO\_PWY\_\_superpathway\_of\_aromatic\_amino\_acid\_biosynthesis\_g\_\_Phascolarctoba  
COMPLETE\_ARO\_PWY\_\_superpathway\_of\_aromatic\_amino\_acid\_biosynthesis\_g\_\_Propionibacteri  
COMPLETE\_ARO\_PWY\_\_superpathway\_of\_aromatic\_amino\_acid\_biosynthesis\_g\_\_Roseburia\_s\_\_F  
COMPLETE\_ARO\_PWY\_\_superpathway\_of\_aromatic\_amino\_acid\_biosynthesis\_g\_\_Ruminococcus\_\_  
DAPLYSINESYN\_PWY\_\_L\_lysine\_biosynthesis\_l\_g\_\_Bifidobacterium\_s\_\_Bifidobacterium\_animalis  
DAPLYSINESYN\_PWY\_\_L\_lysine\_biosynthesis\_l\_g\_\_Citrobacter\_s\_\_Citrobacter\_freundii  
DAPLYSINESYN\_PWY\_\_L\_lysine\_biosynthesis\_l\_g\_\_Enterobacter\_s\_\_Enterobacter\_cloacae  
DAPLYSINESYN\_PWY\_\_L\_lysine\_biosynthesis\_l\_g\_\_Klebsiella\_s\_\_Klebsiella\_pneumoniae  
DAPLYSINESYN\_PWY\_\_L\_lysine\_biosynthesis\_l\_g\_\_Oxalobacter\_s\_\_Oxalobacter\_formigenes  
DTDPRHAMSYN\_PWY\_\_dTDP\_L\_rhamnose\_biosynthesis\_l\_g\_\_Alistipes\_s\_\_Alistipes\_shahii  
DTDPRHAMSYN\_PWY\_\_dTDP\_L\_rhamnose\_biosynthesis\_l\_g\_\_Anaerostipes\_s\_\_Anaerostipes\_had  
DTDPRHAMSYN\_PWY\_\_dTDP\_L\_rhamnose\_biosynthesis\_l\_g\_\_Bacteroides\_s\_\_Bacteroides\_finego  
DTDPRHAMSYN\_PWY\_\_dTDP\_L\_rhamnose\_biosynthesis\_l\_g\_\_Bacteroides\_s\_\_Bacteroides\_fragilis  
DTDPRHAMSYN\_PWY\_\_dTDP\_L\_rhamnose\_biosynthesis\_l\_g\_\_Bacteroides\_s\_\_Bacteroides\_ovatus  
DTDPRHAMSYN\_PWY\_\_dTDP\_L\_rhamnose\_biosynthesis\_l\_g\_\_Bacteroides\_s\_\_Bacteroides\_sp\_1\_\_  
DTDPRHAMSYN\_PWY\_\_dTDP\_L\_rhamnose\_biosynthesis\_l\_g\_\_Bacteroides\_s\_\_Bacteroides\_sp\_2\_\_  
DTDPRHAMSYN\_PWY\_\_dTDP\_L\_rhamnose\_biosynthesis\_l\_g\_\_Bacteroides\_s\_\_Bacteroides\_sp\_2\_\_  
DTDPRHAMSYN\_PWY\_\_dTDP\_L\_rhamnose\_biosynthesis\_l\_g\_\_Bacteroides\_s\_\_Bacteroides\_sp\_3\_\_  
DTDPRHAMSYN\_PWY\_\_dTDP\_L\_rhamnose\_biosynthesis\_l\_g\_\_Bacteroides\_s\_\_Bacteroides\_xylanis  
DTDPRHAMSYN\_PWY\_\_dTDP\_L\_rhamnose\_biosynthesis\_l\_g\_\_Bifidobacterium\_s\_\_Bifidobacteriun  
DTDPRHAMSYN\_PWY\_\_dTDP\_L\_rhamnose\_biosynthesis\_l\_g\_\_Blautia\_s\_\_Blautia\_sp\_KLE\_1732  
DTDPRHAMSYN\_PWY\_\_dTDP\_L\_rhamnose\_biosynthesis\_l\_g\_\_Blautia\_s\_\_Ruminococcus\_obeum

DTDPRHAMSYN\_PWY\_\_dTDP\_L\_rhamnose\_biosynthesis\_l\_g\_Blautia\_s\_Ruminococcus\_torques  
DTDPRHAMSYN\_PWY\_\_dTDP\_L\_rhamnose\_biosynthesis\_l\_g\_Clostridium\_s\_Clostridium\_aspara  
DTDPRHAMSYN\_PWY\_\_dTDP\_L\_rhamnose\_biosynthesis\_l\_g\_Clostridium\_s\_Clostridium\_clostric  
DTDPRHAMSYN\_PWY\_\_dTDP\_L\_rhamnose\_biosynthesis\_l\_g\_Clostridium\_s\_Clostridium\_sp\_L2\_  
DTDPRHAMSYN\_PWY\_\_dTDP\_L\_rhamnose\_biosynthesis\_l\_g\_Clostridium\_s\_Clostridium\_sp\_SS2  
DTDPRHAMSYN\_PWY\_\_dTDP\_L\_rhamnose\_biosynthesis\_l\_g\_Coprococcus\_s\_Coprococcus\_catu:  
DTDPRHAMSYN\_PWY\_\_dTDP\_L\_rhamnose\_biosynthesis\_l\_g\_Eggerthella\_s\_Eggerthella\_lenta  
DTDPRHAMSYN\_PWY\_\_dTDP\_L\_rhamnose\_biosynthesis\_l\_g\_Eggerthella\_s\_Eggerthella\_sp\_1\_3  
DTDPRHAMSYN\_PWY\_\_dTDP\_L\_rhamnose\_biosynthesis\_l\_g\_Eggerthella\_s\_Eggerthella\_sp\_HG/  
DTDPRHAMSYN\_PWY\_\_dTDP\_L\_rhamnose\_biosynthesis\_l\_g\_Enterococcus\_s\_Enterococcus\_fae  
DTDPRHAMSYN\_PWY\_\_dTDP\_L\_rhamnose\_biosynthesis\_l\_g\_Erysipelotrichaceae\_noname\_s\_Eu  
DTDPRHAMSYN\_PWY\_\_dTDP\_L\_rhamnose\_biosynthesis\_l\_g\_Fusobacterium\_s\_Fusobacterium\_  
DTDPRHAMSYN\_PWY\_\_dTDP\_L\_rhamnose\_biosynthesis\_l\_g\_Lachnospiraceae\_noname\_s\_Lachr  
DTDPRHAMSYN\_PWY\_\_dTDP\_L\_rhamnose\_biosynthesis\_l\_g\_Odoribacter\_s\_Odoribacter\_splanc  
DTDPRHAMSYN\_PWY\_\_dTDP\_L\_rhamnose\_biosynthesis\_l\_g\_Oxalobacter\_s\_Oxalobacter\_formi  
DTDPRHAMSYN\_PWY\_\_dTDP\_L\_rhamnose\_biosynthesis\_l\_g\_Propionibacterium\_s\_Propionibact  
DTDPRHAMSYN\_PWY\_\_dTDP\_L\_rhamnose\_biosynthesis\_l\_g\_Roseburia\_s\_Roseburia\_intestinali  
DTDPRHAMSYN\_PWY\_\_dTDP\_L\_rhamnose\_biosynthesis\_l\_g\_Ruminococcus\_s\_Ruminococcus\_c  
DTDPRHAMSYN\_PWY\_\_dTDP\_L\_rhamnose\_biosynthesis\_l\_g\_Ruminococcus\_s\_Ruminococcus\_s  
DTDPRHAMSYN\_PWY\_\_dTDP\_L\_rhamnose\_biosynthesis\_l\_g\_Streptococcus\_s\_Streptococcus\_a  
ECASYN\_PWY\_\_enterobacterial\_common\_antigen\_biosynthesis\_g\_Citrobacter\_s\_Citrobacter\_fr  
ECASYN\_PWY\_\_enterobacterial\_common\_antigen\_biosynthesis\_unclassified  
ENTBACSYN\_PWY\_\_enterobactin\_biosynthesis\_unclassified  
FAO\_PWY\_\_fatty\_acid\_&beta\_oxidation\_l\_g\_Citrobacter\_s\_Citrobacter\_freundii  
FASYN\_ELONG\_PWY\_\_fatty\_acid\_elongation\_\_\_\_saturated\_g\_Bacteroides\_s\_Bacteroides\_sp\_2\_  
FASYN\_ELONG\_PWY\_\_fatty\_acid\_elongation\_\_\_\_saturated\_g\_Bacteroides\_s\_Bacteroides\_xylan  
FASYN\_ELONG\_PWY\_\_fatty\_acid\_elongation\_\_\_\_saturated\_g\_Citrobacter\_s\_Citrobacter\_freunc  
FASYN\_ELONG\_PWY\_\_fatty\_acid\_elongation\_\_\_\_saturated\_g\_Enterobacter\_s\_Enterobacter\_clo  
FASYN\_ELONG\_PWY\_\_fatty\_acid\_elongation\_\_\_\_saturated\_g\_Haemophilus\_s\_Haemophilus\_pa  
FASYN\_ELONG\_PWY\_\_fatty\_acid\_elongation\_\_\_\_saturated\_g\_Klebsiella\_s\_Klebsiella\_pneumon  
FASYN\_INITIAL\_PWY\_\_superpathway\_of\_fatty\_acid\_biosynthesis\_initiation\_(E\_coli)\_g\_Bacteroi  
FASYN\_INITIAL\_PWY\_\_superpathway\_of\_fatty\_acid\_biosynthesis\_initiation\_(E\_coli)\_g\_Bacteroi  
FASYN\_INITIAL\_PWY\_\_superpathway\_of\_fatty\_acid\_biosynthesis\_initiation\_(E\_coli)\_g\_Citrobac  
FASYN\_INITIAL\_PWY\_\_superpathway\_of\_fatty\_acid\_biosynthesis\_initiation\_(E\_coli)\_g\_Klebsiell  
FASYN\_INITIAL\_PWY\_\_superpathway\_of\_fatty\_acid\_biosynthesis\_initiation\_(E\_coli)\_g\_Streptoc  
FERMENTATION\_PWY\_\_mixed\_acid\_fermentation\_g\_Citrobacter\_s\_Citrobacter\_freundii  
FOLSYN\_PWY\_\_superpathway\_of\_tetrahydrofolate\_biosynthesis\_and\_salvage\_g\_Lactococcus\_s\_  
FUC\_RHAMCAT\_PWY\_\_superpathway\_of\_fucose\_and\_rhamnose\_degradation\_g\_Citrobacter\_s\_  
FUCCAT\_PWY\_\_fucose\_degradation\_g\_Citrobacter\_s\_Citrobacter\_freundii  
FUCCAT\_PWY\_\_fucose\_degradation\_g\_Klebsiella\_s\_Klebsiella\_pneumoniae  
GALACTARDEG\_PWY\_\_D\_galactarate\_degradation\_l\_g\_Citrobacter\_s\_Citrobacter\_freundii  
GALACTARDEG\_PWY\_\_D\_galactarate\_degradation\_l\_g\_Enterobacter\_s\_Enterobacter\_cloacae  
GALACTARDEG\_PWY\_\_D\_galactarate\_degradation\_l\_g\_Klebsiella\_s\_Klebsiella\_pneumoniae  
GALACTUROCAT\_PWY\_\_D\_galacturonate\_degradation\_l\_g\_Alistipes\_s\_Alistipes\_shahii  
GALACTUROCAT\_PWY\_\_D\_galacturonate\_degradation\_l\_g\_Citrobacter\_s\_Citrobacter\_freundii  
GLCMANNANAUT\_PWY\_\_superpathway\_of\_N\_acetylglucosamine,\_N\_acetylmannosamine\_and\_N  
GLCMANNANAUT\_PWY\_\_superpathway\_of\_N\_acetylglucosamine,\_N\_acetylmannosamine\_and\_N

GLCMANNANAUT\_PWY\_\_superpathway\_of\_N\_acetylglucosamine,\_N\_acetylmannosamine\_and\_N  
GLUCARDEG\_PWY\_\_D\_glucarate\_degradation\_I\_g\_Citrobacter\_s\_Citrobacter\_freundii  
GLUCARDEG\_PWY\_\_D\_glucarate\_degradation\_I\_g\_Enterobacter\_s\_Enterobacter\_cloacae  
GLUCARGALACTSUPER\_PWY\_\_superpathway\_of\_D\_glucarate\_and\_D\_galactarate\_degradation\_g\_  
GLUCARGALACTSUPER\_PWY\_\_superpathway\_of\_D\_glucarate\_and\_D\_galactarate\_degradation\_g\_  
GLUCARGALACTSUPER\_PWY\_\_superpathway\_of\_D\_glucarate\_and\_D\_galactarate\_degradation\_g\_  
GLUCONEO\_PWY\_\_gluconeogenesis\_I\_g\_Citrobacter\_s\_Citrobacter\_freundii  
GLUCONEO\_PWY\_\_gluconeogenesis\_I\_g\_Enterobacter\_s\_Enterobacter\_cloacae  
GLUCOSE1PMETAB\_PWY\_\_glucose\_and\_glucose\_1\_phosphate\_degradation\_g\_Klebsiella\_s\_Kle  
GLUCOSE1PMETAB\_PWY\_\_glucose\_and\_glucose\_1\_phosphate\_degradation\_unclassified  
GLUDEG\_I\_PWY\_\_GABA\_shunt\_unclassified  
GLUTORN\_PWY\_\_L\_ornithine\_biosynthesis\_g\_Burkholderiales\_noname\_s\_Burkholderiales\_bact  
GLUTORN\_PWY\_\_L\_ornithine\_biosynthesis\_g\_Citrobacter\_s\_Citrobacter\_freundii  
GLUTORN\_PWY\_\_L\_ornithine\_biosynthesis\_g\_Coprococcus\_s\_Coprococcus\_catus  
GLUTORN\_PWY\_\_L\_ornithine\_biosynthesis\_g\_Eubacterium\_s\_Eubacterium\_siraeum  
GLUTORN\_PWY\_\_L\_ornithine\_biosynthesis\_g\_Klebsiella\_s\_Klebsiella\_pneumoniae  
GLUTORN\_PWY\_\_L\_ornithine\_biosynthesis\_g\_Oxalobacter\_s\_Oxalobacter\_formigenes  
GLUTORN\_PWY\_\_L\_ornithine\_biosynthesis\_g\_Parasutterella\_s\_Parasutterella\_excrementihomi  
GLUTORN\_PWY\_\_L\_ornithine\_biosynthesis\_g\_Ruminococcus\_s\_Ruminococcus\_champanellensis  
GLUTORN\_PWY\_\_L\_ornithine\_biosynthesis\_g\_Veillonella\_s\_Veillonella\_dispar  
GLUTORN\_PWY\_\_L\_ornithine\_biosynthesis\_g\_Veillonella\_s\_Veillonella\_parvula  
GLYCOCAT\_PWY\_\_glycogen\_degradation\_I\_(bacterial)\_unclassified  
GLYCOGENSYNTH\_PWY\_\_glycogen\_biosynthesis\_I\_(from\_ADP\_D\_Glucose)\_g\_Anaerostipes\_s\_A  
GLYCOGENSYNTH\_PWY\_\_glycogen\_biosynthesis\_I\_(from\_ADP\_D\_Glucose)\_g\_Blautia\_s\_Blautia  
GLYCOGENSYNTH\_PWY\_\_glycogen\_biosynthesis\_I\_(from\_ADP\_D\_Glucose)\_g\_Blautia\_s\_Ruminc  
GLYCOGENSYNTH\_PWY\_\_glycogen\_biosynthesis\_I\_(from\_ADP\_D\_Glucose)\_g\_Citrobacter\_s\_Cit  
GLYCOGENSYNTH\_PWY\_\_glycogen\_biosynthesis\_I\_(from\_ADP\_D\_Glucose)\_g\_Clostridium\_s\_Clo  
GLYCOGENSYNTH\_PWY\_\_glycogen\_biosynthesis\_I\_(from\_ADP\_D\_Glucose)\_g\_Coprococcus\_s\_C  
GLYCOGENSYNTH\_PWY\_\_glycogen\_biosynthesis\_I\_(from\_ADP\_D\_Glucose)\_g\_Coprococcus\_s\_C  
GLYCOGENSYNTH\_PWY\_\_glycogen\_biosynthesis\_I\_(from\_ADP\_D\_Glucose)\_g\_Coprococcus\_s\_C  
GLYCOGENSYNTH\_PWY\_\_glycogen\_biosynthesis\_I\_(from\_ADP\_D\_Glucose)\_g\_Enterobacter\_s\_E  
GLYCOGENSYNTH\_PWY\_\_glycogen\_biosynthesis\_I\_(from\_ADP\_D\_Glucose)\_g\_Erysipelotrichacea  
GLYCOGENSYNTH\_PWY\_\_glycogen\_biosynthesis\_I\_(from\_ADP\_D\_Glucose)\_g\_Eubacterium\_s\_Ei  
GLYCOGENSYNTH\_PWY\_\_glycogen\_biosynthesis\_I\_(from\_ADP\_D\_Glucose)\_g\_Fusobacterium\_s\_  
GLYCOGENSYNTH\_PWY\_\_glycogen\_biosynthesis\_I\_(from\_ADP\_D\_Glucose)\_g\_Klebsiella\_s\_Kleb  
GLYCOGENSYNTH\_PWY\_\_glycogen\_biosynthesis\_I\_(from\_ADP\_D\_Glucose)\_g\_Lachnospiraceae\_n  
GLYCOGENSYNTH\_PWY\_\_glycogen\_biosynthesis\_I\_(from\_ADP\_D\_Glucose)\_g\_Lactobacillus\_s\_Li  
GLYCOGENSYNTH\_PWY\_\_glycogen\_biosynthesis\_I\_(from\_ADP\_D\_Glucose)\_g\_Ruminococcus\_s\_  
GLYCOL\_GLYOXDEG\_PWY\_\_superpathway\_of\_glycol\_metabolism\_and\_degradation\_unclassified  
GLYCOLYSIS\_E\_D\_\_superpathway\_of\_glycolysis\_and\_Entner\_Doudoroff\_g\_Citrobacter\_s\_Citrob  
GLYCOLYSIS\_TCA\_GLYOX\_BYPASS\_\_superpathway\_of\_glycolysis,\_pyruvate\_dehydrogenase,\_TCA,  
GLYCOLYSIS\_glycolysis\_I\_(from\_glucose\_6\_phosphate)\_g\_Citrobacter\_s\_Citrobacter\_freundii  
GLYCOLYSIS\_glycolysis\_I\_(from\_glucose\_6\_phosphate)\_g\_Lactococcus\_s\_Lactococcus\_lactis  
GLYOXYLATE\_BYPASS\_glyoxylate\_cycle\_g\_Citrobacter\_s\_Citrobacter\_freundii  
GLYOXYLATE\_BYPASS\_glyoxylate\_cycle\_g\_Enterobacter\_s\_Enterobacter\_cloacae  
GLYOXYLATE\_BYPASS\_glyoxylate\_cycle\_g\_Klebsiella\_s\_Klebsiella\_pneumoniae  
GLYOXYLATE\_BYPASS\_glyoxylate\_cycle\_g\_Nakaseomyces\_s\_Candida\_glabrata



GOLPDL CAT\_PWY\_\_superpathway\_of\_glycerol\_degradation\_to\_1,3\_propanediol\_g\_Citrobacter\_s

GOLPDL CAT\_PWY\_\_superpathway\_of\_glycerol\_degradation\_to\_1,3\_propanediol\_g\_Escherichia\_s

GOLPDL CAT\_PWY\_\_superpathway\_of\_glycerol\_degradation\_to\_1,3\_propanediol\_g\_Klebsiella\_s

GOLPDL CAT\_PWY\_\_superpathway\_of\_glycerol\_degradation\_to\_1,3\_propanediol\_g\_Streptococcu

HCAMHPDEG\_PWY\_\_3\_phenylpropanoate\_and\_3\_(3\_hydroxyphenyl)propanoate\_degradation\_to

HCAMHPDEG\_PWY\_\_3\_phenylpropanoate\_and\_3\_(3\_hydroxyphenyl)propanoate\_degradation\_to

HEME\_BIOSYNTHESIS\_II\_heme\_biosynthesis\_I\_(aerobic)\_g\_Citrobacter\_s\_Citrobacter\_freundii

HEME\_BIOSYNTHESIS\_II\_heme\_biosynthesis\_I\_(aerobic)\_g\_Enterobacter\_s\_Enterobacter\_cloac

HEME\_BIOSYNTHESIS\_II\_heme\_biosynthesis\_I\_(aerobic)\_g\_Propionibacterium\_s\_Propionibact

HEME\_BIOSYNTHESIS\_II\_heme\_biosynthesis\_I\_(aerobic)\_g\_Veillonella\_s\_Veillonella\_dispar

HEME\_BIOSYNTHESIS\_II\_heme\_biosynthesis\_I\_(aerobic)\_unclassified

HEMESYN2\_PWY\_\_heme\_biosynthesis\_II\_(anaerobic)\_g\_Enterobacter\_s\_Enterobacter\_cloacae

HEXITOLDEGSUPER\_PWY\_\_superpathway\_of\_hexitol\_degradation\_(bacteria)\_g\_Citrobacter\_s\_C

HISDEG\_PWY\_\_L\_histidine\_degradation\_I\_g\_Alistipes\_s\_Alistipes\_shahii

HISDEG\_PWY\_\_L\_histidine\_degradation\_I\_g\_Citrobacter\_s\_Citrobacter\_freundii

HISDEG\_PWY\_\_L\_histidine\_degradation\_I\_g\_Clostridium\_s\_Clostridium\_symbiosum

HISDEG\_PWY\_\_L\_histidine\_degradation\_I\_g\_Enterobacter\_s\_Enterobacter\_cloacae

HISDEG\_PWY\_\_L\_histidine\_degradation\_I\_g\_Fusobacterium\_s\_Fusobacterium\_nucleatum

HISDEG\_PWY\_\_L\_histidine\_degradation\_I\_g\_Klebsiella\_s\_Klebsiella\_pneumoniae

HISDEG\_PWY\_\_L\_histidine\_degradation\_I\_g\_Streptococcus\_s\_Streptococcus\_australis

HISDEG\_PWY\_\_L\_histidine\_degradation\_I\_g\_Streptococcus\_s\_Streptococcus\_sanguinis

HISTSYN\_PWY\_\_L\_histidine\_biosynthesis\_g\_Anaerostipes\_s\_Anaerostipes\_hadrus

HISTSYN\_PWY\_\_L\_histidine\_biosynthesis\_g\_Bacteroides\_s\_Bacteroides\_faecis

HISTSYN\_PWY\_\_L\_histidine\_biosynthesis\_g\_Bacteroides\_s\_Bacteroides\_sp\_1\_1\_6

HISTSYN\_PWY\_\_L\_histidine\_biosynthesis\_g\_Bacteroides\_s\_Bacteroides\_thetaiotaomicron

HISTSYN\_PWY\_\_L\_histidine\_biosynthesis\_g\_Bifidobacterium\_s\_Bifidobacterium\_bifidum

HISTSYN\_PWY\_\_L\_histidine\_biosynthesis\_g\_Bifidobacterium\_s\_Bifidobacterium\_dentium

HISTSYN\_PWY\_\_L\_histidine\_biosynthesis\_g\_Bifidobacterium\_s\_Bifidobacterium\_pseudocatenul

HISTSYN\_PWY\_\_L\_histidine\_biosynthesis\_g\_Burkholderiales\_noname\_s\_Burkholderiales\_bacter

HISTSYN\_PWY\_\_L\_histidine\_biosynthesis\_g\_Citrobacter\_s\_Citrobacter\_freundii

HISTSYN\_PWY\_\_L\_histidine\_biosynthesis\_g\_Clostridium\_s\_Clostridium\_sp\_SS2\_1

HISTSYN\_PWY\_\_L\_histidine\_biosynthesis\_g\_Collinsella\_s\_Collinsella\_tanakaei

HISTSYN\_PWY\_\_L\_histidine\_biosynthesis\_g\_Eubacterium\_s\_Eubacterium\_siraeum

HISTSYN\_PWY\_\_L\_histidine\_biosynthesis\_g\_Klebsiella\_s\_Klebsiella\_pneumoniae

HISTSYN\_PWY\_\_L\_histidine\_biosynthesis\_g\_Lachnospiraceae\_noname\_s\_Lachnospiraceae\_bact

HISTSYN\_PWY\_\_L\_histidine\_biosynthesis\_g\_Lachnospiraceae\_noname\_s\_Lachnospiraceae\_bact

HISTSYN\_PWY\_\_L\_histidine\_biosynthesis\_g\_Lactobacillus\_s\_Lactobacillus\_casei\_paracasei

HISTSYN\_PWY\_\_L\_histidine\_biosynthesis\_g\_Lactobacillus\_s\_Lactobacillus\_fermentum

HISTSYN\_PWY\_\_L\_histidine\_biosynthesis\_g\_Lactococcus\_s\_Lactococcus\_lactis

HISTSYN\_PWY\_\_L\_histidine\_biosynthesis\_g\_Parasutterella\_s\_Parasutterella\_excrementihominis

HISTSYN\_PWY\_\_L\_histidine\_biosynthesis\_g\_Ruminococcaceae\_noname\_s\_Ruminococcaceae\_ba

HISTSYN\_PWY\_\_L\_histidine\_biosynthesis\_g\_Ruminococcus\_s\_Ruminococcus\_champanellensis

HISTSYN\_PWY\_\_L\_histidine\_biosynthesis\_g\_Veillonella\_s\_Veillonella\_dispar

HISTSYN\_PWY\_\_L\_histidine\_biosynthesis\_g\_Veillonella\_s\_Veillonella\_parvula

HOMOSER\_METSYN\_PWY\_\_L\_methionine\_biosynthesis\_I\_g\_Anaerostipes\_s\_Anaerostipes\_hadr

HOMOSER\_METSYN\_PWY\_\_L\_methionine\_biosynthesis\_I\_g\_Clostridium\_s\_Clostridium\_sp\_SS2\_

HOMOSER\_METSYN\_PWY\_\_L\_methionine\_biosynthesis\_I\_g\_Coprococcus\_s\_Coprococcus\_catus

HOMOSER\_METSYN\_PWY\_\_L\_methionine\_biosynthesis\_I\_g\_Enterobacter\_s\_Enterobacter\_cloac  
HOMOSER\_METSYN\_PWY\_\_L\_methionine\_biosynthesis\_I\_g\_Klebsiella\_s\_Klebsiella\_pneumonia  
HOMOSER\_METSYN\_PWY\_\_L\_methionine\_biosynthesis\_I\_g\_Lachnospiraceae\_noname\_s\_Lachn  
HOMOSER\_METSYN\_PWY\_\_L\_methionine\_biosynthesis\_I\_g\_Streptococcus\_s\_Streptococcus\_mi  
HOMOSER\_METSYN\_PWY\_\_L\_methionine\_biosynthesis\_I\_g\_Streptococcus\_s\_Streptococcus\_sai  
ILEUSYN\_PWY\_\_L\_isoleucine\_biosynthesis\_I\_(from\_threonine)\_g\_Akkermansia\_s\_Akkermansia  
ILEUSYN\_PWY\_\_L\_isoleucine\_biosynthesis\_I\_(from\_threonine)\_g\_Anaerofustis\_s\_Anaerofustis\_  
ILEUSYN\_PWY\_\_L\_isoleucine\_biosynthesis\_I\_(from\_threonine)\_g\_Blautia\_s\_Blautia\_sp\_KLE\_17:  
ILEUSYN\_PWY\_\_L\_isoleucine\_biosynthesis\_I\_(from\_threonine)\_g\_Blautia\_s\_Ruminococcus\_obe  
ILEUSYN\_PWY\_\_L\_isoleucine\_biosynthesis\_I\_(from\_threonine)\_g\_Clostridium\_s\_Clostridium\_as  
ILEUSYN\_PWY\_\_L\_isoleucine\_biosynthesis\_I\_(from\_threonine)\_g\_Clostridium\_s\_Clostridium\_le  
ILEUSYN\_PWY\_\_L\_isoleucine\_biosynthesis\_I\_(from\_threonine)\_g\_Coprococcus\_s\_Coprococcus\_  
ILEUSYN\_PWY\_\_L\_isoleucine\_biosynthesis\_I\_(from\_threonine)\_g\_Coprococcus\_s\_Coprococcus\_  
ILEUSYN\_PWY\_\_L\_isoleucine\_biosynthesis\_I\_(from\_threonine)\_g\_Coprococcus\_s\_Coprococcus\_  
ILEUSYN\_PWY\_\_L\_isoleucine\_biosynthesis\_I\_(from\_threonine)\_g\_Eubacterium\_s\_Eubacterium\_  
ILEUSYN\_PWY\_\_L\_isoleucine\_biosynthesis\_I\_(from\_threonine)\_g\_Fusobacterium\_s\_Fusobacteri  
ILEUSYN\_PWY\_\_L\_isoleucine\_biosynthesis\_I\_(from\_threonine)\_g\_Odoribacter\_s\_Odoribacter\_la  
ILEUSYN\_PWY\_\_L\_isoleucine\_biosynthesis\_I\_(from\_threonine)\_g\_Odoribacter\_s\_Odoribacter\_s  
ILEUSYN\_PWY\_\_L\_isoleucine\_biosynthesis\_I\_(from\_threonine)\_g\_Propionibacterium\_s\_Propion  
ILEUSYN\_PWY\_\_L\_isoleucine\_biosynthesis\_I\_(from\_threonine)\_g\_Ruminococcus\_s\_Ruminococc  
ILEUSYN\_PWY\_\_L\_isoleucine\_biosynthesis\_I\_(from\_threonine)\_g\_Streptococcus\_s\_Streptococc  
ILEUSYN\_PWY\_\_L\_isoleucine\_biosynthesis\_I\_(from\_threonine)\_g\_Streptococcus\_s\_Streptococc  
ILEUSYN\_PWY\_\_L\_isoleucine\_biosynthesis\_I\_(from\_threonine)\_g\_Streptococcus\_s\_Streptococc  
ILEUSYN\_PWY\_\_L\_isoleucine\_biosynthesis\_I\_(from\_threonine)\_g\_Subdoligranulum\_s\_Subdoligr  
KETOGLUCONMET\_PWY\_\_ketogluconate\_metabolism\_g\_Escherichia\_s\_Escherichia\_coli  
KETOGLUCONMET\_PWY\_\_ketogluconate\_metabolism\_unclassified  
LACTOSECAT\_PWY\_\_lactose\_and\_galactose\_degradation\_I\_g\_Enterococcus\_s\_Enterococcus\_du  
LACTOSECAT\_PWY\_\_lactose\_and\_galactose\_degradation\_I\_g\_Enterococcus\_s\_Enterococcus\_fae  
LACTOSECAT\_PWY\_\_lactose\_and\_galactose\_degradation\_I\_g\_Lactobacillus\_s\_Lactobacillus\_cas  
LACTOSECAT\_PWY\_\_lactose\_and\_galactose\_degradation\_I\_g\_Lactobacillus\_s\_Lactobacillus\_rha  
LACTOSECAT\_PWY\_\_lactose\_and\_galactose\_degradation\_I\_g\_Lactobacillus\_s\_Lactobacillus\_rur  
LACTOSECAT\_PWY\_\_lactose\_and\_galactose\_degradation\_I\_g\_Streptococcus\_s\_Streptococcus\_a  
LACTOSECAT\_PWY\_\_lactose\_and\_galactose\_degradation\_I\_g\_Streptococcus\_s\_Streptococcus\_n  
LACTOSECAT\_PWY\_\_lactose\_and\_galactose\_degradation\_I\_g\_Streptococcus\_s\_Streptococcus\_s  
LACTOSECAT\_PWY\_\_lactose\_and\_galactose\_degradation\_I\_g\_Streptococcus\_s\_Streptococcus\_s  
LIPASYN\_PWY\_\_phospholipases  
MET\_SAM\_PWY\_\_superpathway\_of\_S\_adenosyl\_L\_methionine\_biosynthesis\_g\_Anaerostipes\_s\_  
MET\_SAM\_PWY\_\_superpathway\_of\_S\_adenosyl\_L\_methionine\_biosynthesis\_g\_Clostridium\_s\_(  
MET\_SAM\_PWY\_\_superpathway\_of\_S\_adenosyl\_L\_methionine\_biosynthesis\_g\_Enterobacter\_s\_  
MET\_SAM\_PWY\_\_superpathway\_of\_S\_adenosyl\_L\_methionine\_biosynthesis\_g\_Klebsiella\_s\_Kle  
MET\_SAM\_PWY\_\_superpathway\_of\_S\_adenosyl\_L\_methionine\_biosynthesis\_g\_Lachnospiraceae  
MET\_SAM\_PWY\_\_superpathway\_of\_S\_adenosyl\_L\_methionine\_biosynthesis\_g\_Lactococcus\_s\_  
MET\_SAM\_PWY\_\_superpathway\_of\_S\_adenosyl\_L\_methionine\_biosynthesis\_g\_Streptococcus\_s\_  
METSYN\_PWY\_\_L\_homoserine\_and\_L\_methionine\_biosynthesis\_g\_Anaerostipes\_s\_Anaerostipe  
METSYN\_PWY\_\_L\_homoserine\_and\_L\_methionine\_biosynthesis\_g\_Clostridium\_s\_Clostridium\_s  
METSYN\_PWY\_\_L\_homoserine\_and\_L\_methionine\_biosynthesis\_g\_Enterobacter\_s\_Enterobacte  
METSYN\_PWY\_\_L\_homoserine\_and\_L\_methionine\_biosynthesis\_g\_Klebsiella\_s\_Klebsiella\_pneu

METSYN\_PWY\_\_L\_homoserine\_and\_L\_methionine\_biosynthesis\_g\_\_Lachnospiraceae\_noname\_s\_\_  
METSYN\_PWY\_\_L\_homoserine\_and\_L\_methionine\_biosynthesis\_g\_\_Lactococcus\_s\_\_Lactococcus\_\_  
METSYN\_PWY\_\_L\_homoserine\_and\_L\_methionine\_biosynthesis\_g\_\_Streptococcus\_s\_\_Streptococ  
NAD\_BIOSYNTHESIS\_II\_\_NAD\_salvage\_pathway\_II\_g\_\_Citrobacter\_s\_\_Citrobacter\_freundii  
NAD\_BIOSYNTHESIS\_II\_\_NAD\_salvage\_pathway\_II\_g\_\_Enterobacter\_s\_\_Enterobacter\_cloacae  
NAD\_BIOSYNTHESIS\_II\_\_NAD\_salvage\_pathway\_II\_g\_\_Klebsiella\_s\_\_Klebsiella\_pneumoniae  
NAD\_BIOSYNTHESIS\_II\_\_NAD\_salvage\_pathway\_II\_g\_\_Lactococcus\_s\_\_Lactococcus\_lactis  
NAD\_BIOSYNTHESIS\_II\_\_NAD\_salvage\_pathway\_II\_unclassified  
NAGLIPASYN\_PWY\_\_lipid\_IVA\_biosynthesis\_g\_\_Burkholderiales\_noname\_s\_\_Burkholderiales\_bac  
NAGLIPASYN\_PWY\_\_lipid\_IVA\_biosynthesis\_g\_\_Citrobacter\_s\_\_Citrobacter\_freundii  
NAGLIPASYN\_PWY\_\_lipid\_IVA\_biosynthesis\_g\_\_Klebsiella\_s\_\_Klebsiella\_pneumoniae  
NAGLIPASYN\_PWY\_\_lipid\_IVA\_biosynthesis\_g\_\_Oxalobacter\_s\_\_Oxalobacter\_formigenes  
NAGLIPASYN\_PWY\_\_lipid\_IVA\_biosynthesis\_g\_\_Parasutterella\_s\_\_Parasutterella\_excrementihomi  
NAGLIPASYN\_PWY\_\_lipid\_IVA\_biosynthesis\_unclassified  
NONMEVIPP\_PWY\_\_methylethylerythritol\_phosphate\_pathway\_I\_g\_\_Adlercreutzia\_s\_\_Adlercreutzia\_e  
NONMEVIPP\_PWY\_\_methylethylerythritol\_phosphate\_pathway\_I\_g\_\_Akkermansia\_s\_\_Akkermansia\_n  
NONMEVIPP\_PWY\_\_methylethylerythritol\_phosphate\_pathway\_I\_g\_\_Alistipes\_s\_\_Alistipes\_finegoldii  
NONMEVIPP\_PWY\_\_methylethylerythritol\_phosphate\_pathway\_I\_g\_\_Alistipes\_s\_\_Alistipes\_indistinctu  
NONMEVIPP\_PWY\_\_methylethylerythritol\_phosphate\_pathway\_I\_g\_\_Alistipes\_s\_\_Alistipes\_putredinis  
NONMEVIPP\_PWY\_\_methylethylerythritol\_phosphate\_pathway\_I\_g\_\_Alistipes\_s\_\_Alistipes\_sp\_HGB5  
NONMEVIPP\_PWY\_\_methylethylerythritol\_phosphate\_pathway\_I\_g\_\_Anaerostipes\_s\_\_Anaerostipes\_h  
NONMEVIPP\_PWY\_\_methylethylerythritol\_phosphate\_pathway\_I\_g\_\_Anaerotruncus\_s\_\_Anaerotruncu  
NONMEVIPP\_PWY\_\_methylethylerythritol\_phosphate\_pathway\_I\_g\_\_Bacteroides\_s\_\_Bacteroides\_egg  
NONMEVIPP\_PWY\_\_methylethylerythritol\_phosphate\_pathway\_I\_g\_\_Bacteroides\_s\_\_Bacteroides\_ova  
NONMEVIPP\_PWY\_\_methylethylerythritol\_phosphate\_pathway\_I\_g\_\_Bacteroides\_s\_\_Bacteroides\_sp\_\_  
NONMEVIPP\_PWY\_\_methylethylerythritol\_phosphate\_pathway\_I\_g\_\_Bacteroides\_s\_\_Bacteroides\_sp\_\_  
NONMEVIPP\_PWY\_\_methylethylerythritol\_phosphate\_pathway\_I\_g\_\_Bacteroides\_s\_\_Bacteroides\_sp\_\_  
NONMEVIPP\_PWY\_\_methylethylerythritol\_phosphate\_pathway\_I\_g\_\_Bacteroides\_s\_\_Bacteroides\_sp\_\_  
NONMEVIPP\_PWY\_\_methylethylerythritol\_phosphate\_pathway\_I\_g\_\_Bacteroides\_s\_\_Bacteroides\_xyla  
NONMEVIPP\_PWY\_\_methylethylerythritol\_phosphate\_pathway\_I\_g\_\_Bifidobacterium\_s\_\_Bifidobacter  
NONMEVIPP\_PWY\_\_methylethylerythritol\_phosphate\_pathway\_I\_g\_\_Bifidobacterium\_s\_\_Bifidobacter  
NONMEVIPP\_PWY\_\_methylethylerythritol\_phosphate\_pathway\_I\_g\_\_Blautia\_s\_\_Blautia\_sp\_KLE\_1732  
NONMEVIPP\_PWY\_\_methylethylerythritol\_phosphate\_pathway\_I\_g\_\_Blautia\_s\_\_Ruminococcus\_gnavu  
NONMEVIPP\_PWY\_\_methylethylerythritol\_phosphate\_pathway\_I\_g\_\_Blautia\_s\_\_Ruminococcus\_obeur  
NONMEVIPP\_PWY\_\_methylethylerythritol\_phosphate\_pathway\_I\_g\_\_Blautia\_s\_\_Ruminococcus\_torque  
NONMEVIPP\_PWY\_\_methylethylerythritol\_phosphate\_pathway\_I\_g\_\_Burkholderiales\_noname\_s\_\_Bur  
NONMEVIPP\_PWY\_\_methylethylerythritol\_phosphate\_pathway\_I\_g\_\_Butyrivibrio\_s\_\_Butyrivibrio\_cros  
NONMEVIPP\_PWY\_\_methylethylerythritol\_phosphate\_pathway\_I\_g\_\_Citrobacter\_s\_\_Citrobacter\_freur  
NONMEVIPP\_PWY\_\_methylethylerythritol\_phosphate\_pathway\_I\_g\_\_Clostridium\_s\_\_Clostridium\_aspa  
NONMEVIPP\_PWY\_\_methylethylerythritol\_phosphate\_pathway\_I\_g\_\_Clostridium\_s\_\_Clostridium\_hath  
NONMEVIPP\_PWY\_\_methylethylerythritol\_phosphate\_pathway\_I\_g\_\_Clostridium\_s\_\_Clostridium\_perf  
NONMEVIPP\_PWY\_\_methylethylerythritol\_phosphate\_pathway\_I\_g\_\_Clostridium\_s\_\_Clostridium\_sp\_I  
NONMEVIPP\_PWY\_\_methylethylerythritol\_phosphate\_pathway\_I\_g\_\_Clostridium\_s\_\_Clostridium\_sp\_S  
NONMEVIPP\_PWY\_\_methylethylerythritol\_phosphate\_pathway\_I\_g\_\_Collinsella\_s\_\_Collinsella\_intestir  
NONMEVIPP\_PWY\_\_methylethylerythritol\_phosphate\_pathway\_I\_g\_\_Collinsella\_s\_\_Collinsella\_tanaka  
NONMEVIPP\_PWY\_\_methylethylerythritol\_phosphate\_pathway\_I\_g\_\_Coprothermobacter\_s\_\_Coprothermobacter\_fa  
NONMEVIPP\_PWY\_\_methylethylerythritol\_phosphate\_pathway\_I\_g\_\_Dorea\_s\_\_Dorea\_formicigeneran

NONMEVIPP\_PWY\_\_methylerythritol\_phosphate\_pathway\_l\_g\_Eggerthella\_s\_Eggerthella\_lenta  
NONMEVIPP\_PWY\_\_methylerythritol\_phosphate\_pathway\_l\_g\_Eggerthella\_s\_Eggerthella\_sp\_1  
NONMEVIPP\_PWY\_\_methylerythritol\_phosphate\_pathway\_l\_g\_Eggerthella\_s\_Eggerthella\_sp\_H  
NONMEVIPP\_PWY\_\_methylerythritol\_phosphate\_pathway\_l\_g\_Erysipelotrichaceae\_noname\_s\_  
NONMEVIPP\_PWY\_\_methylerythritol\_phosphate\_pathway\_l\_g\_Erysipelotrichaceae\_noname\_s\_  
NONMEVIPP\_PWY\_\_methylerythritol\_phosphate\_pathway\_l\_g\_Eubacterium\_s\_Eubacterium\_ra  
NONMEVIPP\_PWY\_\_methylerythritol\_phosphate\_pathway\_l\_g\_Eubacterium\_s\_Eubacterium\_sp  
NONMEVIPP\_PWY\_\_methylerythritol\_phosphate\_pathway\_l\_g\_Fusobacterium\_s\_Fusobacteriur  
NONMEVIPP\_PWY\_\_methylerythritol\_phosphate\_pathway\_l\_g\_Holdemania\_s\_Holdemania\_filli  
NONMEVIPP\_PWY\_\_methylerythritol\_phosphate\_pathway\_l\_g\_Klebsiella\_s\_Klebsiella\_pneumo  
NONMEVIPP\_PWY\_\_methylerythritol\_phosphate\_pathway\_l\_g\_Lachnospiraceae\_noname\_s\_La  
NONMEVIPP\_PWY\_\_methylerythritol\_phosphate\_pathway\_l\_g\_Lachnospiraceae\_noname\_s\_La  
NONMEVIPP\_PWY\_\_methylerythritol\_phosphate\_pathway\_l\_g\_Lachnospiraceae\_noname\_s\_La  
NONMEVIPP\_PWY\_\_methylerythritol\_phosphate\_pathway\_l\_g\_Lachnospiraceae\_noname\_s\_La  
NONMEVIPP\_PWY\_\_methylerythritol\_phosphate\_pathway\_l\_g\_Lachnospiraceae\_noname\_s\_La  
NONMEVIPP\_PWY\_\_methylerythritol\_phosphate\_pathway\_l\_g\_Lachnospiraceae\_noname\_s\_La  
NONMEVIPP\_PWY\_\_methylerythritol\_phosphate\_pathway\_l\_g\_Odoribacter\_s\_Odoribacter\_lan  
NONMEVIPP\_PWY\_\_methylerythritol\_phosphate\_pathway\_l\_g\_Odoribacter\_s\_Odoribacter\_spl  
NONMEVIPP\_PWY\_\_methylerythritol\_phosphate\_pathway\_l\_g\_Paraprevotella\_s\_Paraprevotelli  
NONMEVIPP\_PWY\_\_methylerythritol\_phosphate\_pathway\_l\_g\_Parasutterella\_s\_Parasutterella  
NONMEVIPP\_PWY\_\_methylerythritol\_phosphate\_pathway\_l\_g\_Peptostreptococcaceae\_noname\_  
NONMEVIPP\_PWY\_\_methylerythritol\_phosphate\_pathway\_l\_g\_Phascolarctobacterium\_s\_Phasc  
NONMEVIPP\_PWY\_\_methylerythritol\_phosphate\_pathway\_l\_g\_Propionibacterium\_s\_Propionib  
NONMEVIPP\_PWY\_\_methylerythritol\_phosphate\_pathway\_l\_g\_Roseburia\_s\_Roseburia\_homini  
NONMEVIPP\_PWY\_\_methylerythritol\_phosphate\_pathway\_l\_g\_Ruminococcus\_s\_Ruminococcus  
NONMEVIPP\_PWY\_\_methylerythritol\_phosphate\_pathway\_l\_g\_Slackia\_s\_Slackia\_piriformis  
NONOXIPENT\_PWY\_\_pentose\_phosphate\_pathway\_(non\_oxidative\_branch)\_g\_Alistipes\_s\_Alist  
NONOXIPENT\_PWY\_\_pentose\_phosphate\_pathway\_(non\_oxidative\_branch)\_g>Anaerostipes\_s\_  
NONOXIPENT\_PWY\_\_pentose\_phosphate\_pathway\_(non\_oxidative\_branch)\_g\_Bacteroides\_s\_E  
NONOXIPENT\_PWY\_\_pentose\_phosphate\_pathway\_(non\_oxidative\_branch)\_g\_Bacteroides\_s\_E  
NONOXIPENT\_PWY\_\_pentose\_phosphate\_pathway\_(non\_oxidative\_branch)\_g\_Blautia\_s\_Rumir  
NONOXIPENT\_PWY\_\_pentose\_phosphate\_pathway\_(non\_oxidative\_branch)\_g\_Blautia\_s\_Rumir  
NONOXIPENT\_PWY\_\_pentose\_phosphate\_pathway\_(non\_oxidative\_branch)\_g\_Citrobacter\_s\_C  
NONOXIPENT\_PWY\_\_pentose\_phosphate\_pathway\_(non\_oxidative\_branch)\_g\_Clostridiales\_non  
NONOXIPENT\_PWY\_\_pentose\_phosphate\_pathway\_(non\_oxidative\_branch)\_g\_Clostridium\_s\_C  
NONOXIPENT\_PWY\_\_pentose\_phosphate\_pathway\_(non\_oxidative\_branch)\_g\_Clostridium\_s\_C  
NONOXIPENT\_PWY\_\_pentose\_phosphate\_pathway\_(non\_oxidative\_branch)\_g\_Coprococcus\_s\_  
NONOXIPENT\_PWY\_\_pentose\_phosphate\_pathway\_(non\_oxidative\_branch)\_g\_Enterobacter\_s\_  
NONOXIPENT\_PWY\_\_pentose\_phosphate\_pathway\_(non\_oxidative\_branch)\_g\_Erysipelotrichace  
NONOXIPENT\_PWY\_\_pentose\_phosphate\_pathway\_(non\_oxidative\_branch)\_g\_Erysipelotrichace  
NONOXIPENT\_PWY\_\_pentose\_phosphate\_pathway\_(non\_oxidative\_branch)\_g\_Eubacterium\_s\_  
NONOXIPENT\_PWY\_\_pentose\_phosphate\_pathway\_(non\_oxidative\_branch)\_g\_Eubacterium\_s\_  
NONOXIPENT\_PWY\_\_pentose\_phosphate\_pathway\_(non\_oxidative\_branch)\_g\_Fusobacterium\_s\_  
NONOXIPENT\_PWY\_\_pentose\_phosphate\_pathway\_(non\_oxidative\_branch)\_g\_Klebsiella\_s\_Kle  
NONOXIPENT\_PWY\_\_pentose\_phosphate\_pathway\_(non\_oxidative\_branch)\_g\_Lachnospiraceae\_  
NONOXIPENT\_PWY\_\_pentose\_phosphate\_pathway\_(non\_oxidative\_branch)\_g\_Lachnospiraceae\_  
NONOXIPENT\_PWY\_\_pentose\_phosphate\_pathway\_(non\_oxidative\_branch)\_g\_Lactobacillus\_s\_  
NONOXIPENT\_PWY\_\_pentose\_phosphate\_pathway\_(non\_oxidative\_branch)\_g\_Lactobacillus\_s\_

NONOXIPENT\_PWY\_pentose\_phosphate\_pathway\_(non\_oxidative\_branch)\_g\_Lactococcus\_s\_L  
NONOXIPENT\_PWY\_pentose\_phosphate\_pathway\_(non\_oxidative\_branch)\_g\_Odoribacter\_s\_O  
NONOXIPENT\_PWY\_pentose\_phosphate\_pathway\_(non\_oxidative\_branch)\_g\_Oxalobacter\_s\_O  
NONOXIPENT\_PWY\_pentose\_phosphate\_pathway\_(non\_oxidative\_branch)\_g\_Peptostreptococc  
NONOXIPENT\_PWY\_pentose\_phosphate\_pathway\_(non\_oxidative\_branch)\_g\_Phascalartobact  
NONOXIPENT\_PWY\_pentose\_phosphate\_pathway\_(non\_oxidative\_branch)\_g\_Propionibacteriur  
NONOXIPENT\_PWY\_pentose\_phosphate\_pathway\_(non\_oxidative\_branch)\_g\_Veillonella\_s\_Ve  
NONOXIPENT\_PWY\_pentose\_phosphate\_pathway\_(non\_oxidative\_branch)\_g\_Veillonella\_s\_Ve  
OANTIGEN\_PWY\_O\_antigen\_building\_blocks\_biosynthesis\_(E\_coli)\_g\_Lactococcus\_s\_Lactoco  
OANTIGEN\_PWY\_O\_antigen\_building\_blocks\_biosynthesis\_(E\_coli)\_g\_Ruminococcus\_s\_Rumi  
ORNARGDEG\_PWY\_superpathway\_of\_L\_arginine\_and\_L\_ornithine\_degradation\_unclassified  
P105\_PWY\_TCA\_cycle\_IV\_(2\_oxoglutarate\_decarboxylase)\_g\_Citrobacter\_s\_Citrobacter\_freun  
P108\_PWY\_pyruvate\_fermentation\_to\_propanoate\_I\_g\_Propionibacterium\_s\_Propionibacteri  
P125\_PWY\_superpathway\_of\_(R,R)\_butanediol\_biosynthesis\_g\_Lactococcus\_s\_Lactococcus\_la  
P125\_PWY\_superpathway\_of\_(R,R)\_butanediol\_biosynthesis\_unclassified  
P161\_PWY\_acetylene\_degradation\_g\_Citrobacter\_s\_Citrobacter\_freundii  
P161\_PWY\_acetylene\_degradation\_g\_Enterobacter\_s\_Enterobacter\_cloacae  
P161\_PWY\_acetylene\_degradation\_g\_Klebsiella\_s\_Klebsiella\_pneumoniae  
P163\_PWY\_L\_lysine\_fermentation\_to\_acetate\_and\_butanoate\_g\_Fusobacterium\_s\_Fusobacte  
P185\_PWY\_formaldehyde\_assimilation\_III\_(dihydroxyacetone\_cycle)\_g\_Citrobacter\_s\_Citroba  
P185\_PWY\_formaldehyde\_assimilation\_III\_(dihydroxyacetone\_cycle)\_g\_Escherichia\_s\_Escheric  
P23\_PWY\_reductive\_TCA\_cycle\_I\_unclassified  
P441\_PWY\_superpathway\_of\_N\_acetylneuraminate\_degradation\_g\_Citrobacter\_s\_Citrobacter  
P461\_PWY\_hexitol\_fermentation\_to\_lactate,formate,ethanol\_and\_acetate\_g\_Anaerostipes\_s  
P461\_PWY\_hexitol\_fermentation\_to\_lactate,formate,ethanol\_and\_acetate\_g\_Citrobacter\_s\_  
P461\_PWY\_hexitol\_fermentation\_to\_lactate,formate,ethanol\_and\_acetate\_g\_Clostridium\_s\_  
P461\_PWY\_hexitol\_fermentation\_to\_lactate,formate,ethanol\_and\_acetate\_g\_Enterobacter\_s  
P461\_PWY\_hexitol\_fermentation\_to\_lactate,formate,ethanol\_and\_acetate\_g\_Klebsiella\_s\_k  
P461\_PWY\_hexitol\_fermentation\_to\_lactate,formate,ethanol\_and\_acetate\_g\_Lachnospiracea  
P461\_PWY\_hexitol\_fermentation\_to\_lactate,formate,ethanol\_and\_acetate\_g\_Lactobacillus\_s  
P461\_PWY\_hexitol\_fermentation\_to\_lactate,formate,ethanol\_and\_acetate\_g\_Lactobacillus\_s  
PANTO\_PWY\_phosphopantothenate\_biosynthesis\_I\_g\_Adlercreutzia\_s\_Adlercreutzia\_equolifa  
PANTO\_PWY\_phosphopantothenate\_biosynthesis\_I\_g\_Akkermansia\_s\_Akkermansia\_muciniph  
PANTO\_PWY\_phosphopantothenate\_biosynthesis\_I\_g\_Alistipes\_s\_Alistipes\_finegoldii  
PANTO\_PWY\_phosphopantothenate\_biosynthesis\_I\_g\_Alistipes\_s\_Alistipes\_indistinctus  
PANTO\_PWY\_phosphopantothenate\_biosynthesis\_I\_g\_Alistipes\_s\_Alistipes\_putredinis  
PANTO\_PWY\_phosphopantothenate\_biosynthesis\_I\_g\_Alistipes\_s\_Alistipes\_sp\_HGB5  
PANTO\_PWY\_phosphopantothenate\_biosynthesis\_I\_g\_Anaerofustis\_s\_Anaerofustis\_stercorihc  
PANTO\_PWY\_phosphopantothenate\_biosynthesis\_I\_g\_Anaerostipes\_s\_Anaerostipes\_hadrus  
PANTO\_PWY\_phosphopantothenate\_biosynthesis\_I\_g\_Bacteroides\_s\_Bacteroides\_cellulosilyti  
PANTO\_PWY\_phosphopantothenate\_biosynthesis\_I\_g\_Bacteroides\_s\_Bacteroides\_clarus  
PANTO\_PWY\_phosphopantothenate\_biosynthesis\_I\_g\_Bacteroides\_s\_Bacteroides\_coprocola  
PANTO\_PWY\_phosphopantothenate\_biosynthesis\_I\_g\_Bacteroides\_s\_Bacteroides\_dorei  
PANTO\_PWY\_phosphopantothenate\_biosynthesis\_I\_g\_Bacteroides\_s\_Bacteroides\_eggerthii  
PANTO\_PWY\_phosphopantothenate\_biosynthesis\_I\_g\_Bacteroides\_s\_Bacteroides\_faecis  
PANTO\_PWY\_phosphopantothenate\_biosynthesis\_I\_g\_Bacteroides\_s\_Bacteroides\_finegoldii  
PANTO\_PWY\_phosphopantothenate\_biosynthesis\_I\_g\_Bacteroides\_s\_Bacteroides\_intestinalis

PANTO\_PWY\_\_phosphopantothenate\_biosynthesis\_l\_g\_Bacteroides\_s\_Bacteroides\_massiliensis  
PANTO\_PWY\_\_phosphopantothenate\_biosynthesis\_l\_g\_Bacteroides\_s\_Bacteroides\_ovatus  
PANTO\_PWY\_\_phosphopantothenate\_biosynthesis\_l\_g\_Bacteroides\_s\_Bacteroides\_plebeius  
PANTO\_PWY\_\_phosphopantothenate\_biosynthesis\_l\_g\_Bacteroides\_s\_Bacteroides\_sp\_1\_1\_30  
PANTO\_PWY\_\_phosphopantothenate\_biosynthesis\_l\_g\_Bacteroides\_s\_Bacteroides\_sp\_1\_1\_6  
PANTO\_PWY\_\_phosphopantothenate\_biosynthesis\_l\_g\_Bacteroides\_s\_Bacteroides\_sp\_2\_1\_22  
PANTO\_PWY\_\_phosphopantothenate\_biosynthesis\_l\_g\_Bacteroides\_s\_Bacteroides\_sp\_2\_2\_4  
PANTO\_PWY\_\_phosphopantothenate\_biosynthesis\_l\_g\_Bacteroides\_s\_Bacteroides\_sp\_3\_1\_19  
PANTO\_PWY\_\_phosphopantothenate\_biosynthesis\_l\_g\_Bacteroides\_s\_Bacteroides\_sp\_3\_1\_23  
PANTO\_PWY\_\_phosphopantothenate\_biosynthesis\_l\_g\_Bacteroides\_s\_Bacteroides\_sp\_3\_1\_33F  
PANTO\_PWY\_\_phosphopantothenate\_biosynthesis\_l\_g\_Bacteroides\_s\_Bacteroides\_sp\_3\_1\_40A  
PANTO\_PWY\_\_phosphopantothenate\_biosynthesis\_l\_g\_Bacteroides\_s\_Bacteroides\_sp\_4\_3\_47F  
PANTO\_PWY\_\_phosphopantothenate\_biosynthesis\_l\_g\_Bacteroides\_s\_Bacteroides\_sp\_9\_1\_42F  
PANTO\_PWY\_\_phosphopantothenate\_biosynthesis\_l\_g\_Bacteroides\_s\_Bacteroides\_sp\_D20  
PANTO\_PWY\_\_phosphopantothenate\_biosynthesis\_l\_g\_Bacteroides\_s\_Bacteroides\_stercoris  
PANTO\_PWY\_\_phosphopantothenate\_biosynthesis\_l\_g\_Bacteroides\_s\_Bacteroides\_thetaiotaon  
PANTO\_PWY\_\_phosphopantothenate\_biosynthesis\_l\_g\_Bacteroides\_s\_Bacteroides\_uniformis  
PANTO\_PWY\_\_phosphopantothenate\_biosynthesis\_l\_g\_Bacteroides\_s\_Bacteroides\_xylanisolver  
PANTO\_PWY\_\_phosphopantothenate\_biosynthesis\_l\_g\_Barnesiella\_s\_Barnesiella\_intestinihomi  
PANTO\_PWY\_\_phosphopantothenate\_biosynthesis\_l\_g\_Bilophila\_s\_Bilophila\_wadsworthia  
PANTO\_PWY\_\_phosphopantothenate\_biosynthesis\_l\_g\_Blautia\_s\_Blautia\_hydrogenotrophica  
PANTO\_PWY\_\_phosphopantothenate\_biosynthesis\_l\_g\_Blautia\_s\_Blautia\_sp\_KLE\_1732  
PANTO\_PWY\_\_phosphopantothenate\_biosynthesis\_l\_g\_Blautia\_s\_Ruminococcus\_gnavus  
PANTO\_PWY\_\_phosphopantothenate\_biosynthesis\_l\_g\_Burkholderiales\_noname\_s\_Burkholder  
PANTO\_PWY\_\_phosphopantothenate\_biosynthesis\_l\_g\_Butyrvibrio\_s\_Butyrvibrio\_crossotus  
PANTO\_PWY\_\_phosphopantothenate\_biosynthesis\_l\_g\_Citrobacter\_s\_Citrobacter\_freundii  
PANTO\_PWY\_\_phosphopantothenate\_biosynthesis\_l\_g\_Clostridium\_s\_Clostridium\_sp\_L2\_50  
PANTO\_PWY\_\_phosphopantothenate\_biosynthesis\_l\_g\_Clostridium\_s\_Clostridium\_sp\_SS2\_1  
PANTO\_PWY\_\_phosphopantothenate\_biosynthesis\_l\_g\_Copro bacter\_s\_Copro bacter\_fastidiosus  
PANTO\_PWY\_\_phosphopantothenate\_biosynthesis\_l\_g\_Coprococcus\_s\_Coprococcus\_eutactus  
PANTO\_PWY\_\_phosphopantothenate\_biosynthesis\_l\_g\_Coprococcus\_s\_Coprococcus\_sp\_ART55  
PANTO\_PWY\_\_phosphopantothenate\_biosynthesis\_l\_g\_Eggerthella\_s\_Eggerthella\_lenta  
PANTO\_PWY\_\_phosphopantothenate\_biosynthesis\_l\_g\_Eggerthella\_s\_Eggerthella\_sp\_1\_3\_56F  
PANTO\_PWY\_\_phosphopantothenate\_biosynthesis\_l\_g\_Eggerthella\_s\_Eggerthella\_sp\_HGA1  
PANTO\_PWY\_\_phosphopantothenate\_biosynthesis\_l\_g\_Enterobacter\_s\_Enterobacter\_cloacae  
PANTO\_PWY\_\_phosphopantothenate\_biosynthesis\_l\_g\_Enterococcus\_s\_Enterococcus\_faecalis  
PANTO\_PWY\_\_phosphopantothenate\_biosynthesis\_l\_g\_Enterorhabdus\_s\_Enterorhabdus\_caecii  
PANTO\_PWY\_\_phosphopantothenate\_biosynthesis\_l\_g\_Eubacterium\_s\_Eubacterium\_hallii  
PANTO\_PWY\_\_phosphopantothenate\_biosynthesis\_l\_g\_Eubacterium\_s\_Eubacterium\_ramulus  
PANTO\_PWY\_\_phosphopantothenate\_biosynthesis\_l\_g\_Eubacterium\_s\_Eubacterium\_ventriosu  
PANTO\_PWY\_\_phosphopantothenate\_biosynthesis\_l\_g\_Klebsiella\_s\_Klebsiella\_pneumoniae  
PANTO\_PWY\_\_phosphopantothenate\_biosynthesis\_l\_g\_Lachnospiraceae\_noname\_s\_Lachnospir  
PANTO\_PWY\_\_phosphopantothenate\_biosynthesis\_l\_g\_Lachnospiraceae\_noname\_s\_Lachnospir  
PANTO\_PWY\_\_phosphopantothenate\_biosynthesis\_l\_g\_Lachnospiraceae\_noname\_s\_Lachnospir  
PANTO\_PWY\_\_phosphopantothenate\_biosynthesis\_l\_g\_Lachnospiraceae\_noname\_s\_Lachnospir  
PANTO\_PWY\_\_phosphopantothenate\_biosynthesis\_l\_g\_Odoribacter\_s\_Odoribacter\_laneus  
PANTO\_PWY\_\_phosphopantothenate\_biosynthesis\_l\_g\_Odoribacter\_s\_Odoribacter\_splanchnic







PEPTIDOGLYCANSYN\_PWY\_\_peptidoglycan\_biosynthesis\_I\_(meso\_diaminopimelate\_containing)\_g  
PHOSLIPSYN\_PWY\_\_superpathway\_of\_phospholipid\_biosynthesis\_I\_(bacteria)\_g\_\_Citrobacter\_s\_\_  
PHOSLIPSYN\_PWY\_\_superpathway\_of\_phospholipid\_biosynthesis\_I\_(bacteria)\_g\_\_Enterobacter\_s\_\_  
PHOSLIPSYN\_PWY\_\_superpathway\_of\_phospholipid\_biosynthesis\_I\_(bacteria)\_g\_\_Klebsiella\_s\_\_K  
POLYAMINSYN3\_PWY\_\_superpathway\_of\_polyamine\_biosynthesis\_II\_unclassified  
POLYAMSYN\_PWY\_\_superpathway\_of\_polyamine\_biosynthesis\_I\_g\_\_Veillonella\_s\_\_Veillonella\_p  
PPGPPMET\_PWY\_\_ppGpp\_biosynthesis\_g\_\_Citrobacter\_s\_\_Citrobacter\_freundii  
PPGPPMET\_PWY\_\_ppGpp\_biosynthesis\_g\_\_Enterobacter\_s\_\_Enterobacter\_cloacae  
PPGPPMET\_PWY\_\_ppGpp\_biosynthesis\_g\_\_Klebsiella\_s\_\_Klebsiella\_pneumoniae  
PROTocatechuate\_ORTHO\_CLEAVAGE\_PWY\_\_protocatechuate\_degradation\_II\_(ortho\_cleavage  
PROTocatechuate\_ORTHO\_CLEAVAGE\_PWY\_\_protocatechuate\_degradation\_II\_(ortho\_cleavage  
PROTocatechuate\_ORTHO\_CLEAVAGE\_PWY\_\_protocatechuate\_degradation\_II\_(ortho\_cleavage  
PWY\_101\_\_photosynthesis\_light\_reactions  
PWY\_101\_\_photosynthesis\_light\_reactions\_unclassified

PWY\_1042\_glycolysis\_IV\_(plant\_cytosol)\_g\_Akkermansia\_s\_Akkermansia\_muciniphila  
 PWY\_1042\_glycolysis\_IV\_(plant\_cytosol)\_g\_Alistipes\_s\_Alistipes\_senegalensis  
 PWY\_1042\_glycolysis\_IV\_(plant\_cytosol)\_g\_Alistipes\_s\_Alistipes\_shahii  
 PWY\_1042\_glycolysis\_IV\_(plant\_cytosol)\_g\_Anaerofustis\_s\_Anaerofustis\_stercorihominis  
 PWY\_1042\_glycolysis\_IV\_(plant\_cytosol)\_g\_Anaerostipes\_s\_Anaerostipes\_hadrus  
 PWY\_1042\_glycolysis\_IV\_(plant\_cytosol)\_g\_Anaerotruncus\_s\_Anaerotruncus\_colihominis  
 PWY\_1042\_glycolysis\_IV\_(plant\_cytosol)\_g\_Bacteroides\_s\_Bacteroides\_coprocola  
 PWY\_1042\_glycolysis\_IV\_(plant\_cytosol)\_g\_Bacteroides\_s\_Bacteroides\_faecis  
 PWY\_1042\_glycolysis\_IV\_(plant\_cytosol)\_g\_Bacteroides\_s\_Bacteroides\_finegoldii  
 PWY\_1042\_glycolysis\_IV\_(plant\_cytosol)\_g\_Bacteroides\_s\_Bacteroides\_ovatus  
 PWY\_1042\_glycolysis\_IV\_(plant\_cytosol)\_g\_Bacteroides\_s\_Bacteroides\_sp\_1\_1\_30  
 PWY\_1042\_glycolysis\_IV\_(plant\_cytosol)\_g\_Bacteroides\_s\_Bacteroides\_sp\_1\_1\_6  
 PWY\_1042\_glycolysis\_IV\_(plant\_cytosol)\_g\_Bacteroides\_s\_Bacteroides\_sp\_2\_1\_22  
 PWY\_1042\_glycolysis\_IV\_(plant\_cytosol)\_g\_Bacteroides\_s\_Bacteroides\_sp\_2\_2\_4  
 PWY\_1042\_glycolysis\_IV\_(plant\_cytosol)\_g\_Bacteroides\_s\_Bacteroides\_sp\_3\_1\_23  
 PWY\_1042\_glycolysis\_IV\_(plant\_cytosol)\_g\_Bacteroides\_s\_Bacteroides\_thetaiotaomicron  
 PWY\_1042\_glycolysis\_IV\_(plant\_cytosol)\_g\_Bacteroides\_s\_Bacteroides\_xylanisolvens  
 PWY\_1042\_glycolysis\_IV\_(plant\_cytosol)\_g\_Barnesiella\_s\_Barnesiella\_intestinihominis  
 PWY\_1042\_glycolysis\_IV\_(plant\_cytosol)\_g\_Blautia\_s\_Blautia\_sp\_KLE\_1732  
 PWY\_1042\_glycolysis\_IV\_(plant\_cytosol)\_g\_Blautia\_s\_Ruminococcus\_obeum  
 PWY\_1042\_glycolysis\_IV\_(plant\_cytosol)\_g\_Citrobacter\_s\_Citrobacter\_freundii  
 PWY\_1042\_glycolysis\_IV\_(plant\_cytosol)\_g\_Clostridiales\_noname\_s\_Clostridiales\_bacterium\_1  
 PWY\_1042\_glycolysis\_IV\_(plant\_cytosol)\_g\_Clostridium\_s\_Clostridium\_asparagiforme  
 PWY\_1042\_glycolysis\_IV\_(plant\_cytosol)\_g\_Clostridium\_s\_Clostridium\_perfringens  
 PWY\_1042\_glycolysis\_IV\_(plant\_cytosol)\_g\_Clostridium\_s\_Clostridium\_sp\_SS2\_1  
 PWY\_1042\_glycolysis\_IV\_(plant\_cytosol)\_g\_Coprococcus\_s\_Coprococcus\_catus  
 PWY\_1042\_glycolysis\_IV\_(plant\_cytosol)\_g\_Eggerthella\_s\_Eggerthella\_lenta  
 PWY\_1042\_glycolysis\_IV\_(plant\_cytosol)\_g\_Eggerthella\_s\_Eggerthella\_sp\_1\_3\_56FAA  
 PWY\_1042\_glycolysis\_IV\_(plant\_cytosol)\_g\_Eggerthella\_s\_Eggerthella\_sp\_HGA1  
 PWY\_1042\_glycolysis\_IV\_(plant\_cytosol)\_g\_Enterococcus\_s\_Enterococcus\_faecium  
 PWY\_1042\_glycolysis\_IV\_(plant\_cytosol)\_g\_Holdemania\_s\_Holdemania\_filiformis  
 PWY\_1042\_glycolysis\_IV\_(plant\_cytosol)\_g\_Klebsiella\_s\_Klebsiella\_pneumoniae  
 PWY\_1042\_glycolysis\_IV\_(plant\_cytosol)\_g\_Lachnospiraceae\_noname\_s\_Lachnospiraceae\_bac  
 PWY\_1042\_glycolysis\_IV\_(plant\_cytosol)\_g\_Lachnospiraceae\_noname\_s\_Lachnospiraceae\_bac  
 PWY\_1042\_glycolysis\_IV\_(plant\_cytosol)\_g\_Lachnospiraceae\_noname\_s\_Lachnospiraceae\_bac  
 PWY\_1042\_glycolysis\_IV\_(plant\_cytosol)\_g\_Odoribacter\_s\_Odoribacter\_splanchnicus  
 PWY\_1042\_glycolysis\_IV\_(plant\_cytosol)\_g\_Pediococcus\_s\_Pediococcus\_acidilactici  
 PWY\_1042\_glycolysis\_IV\_(plant\_cytosol)\_g\_Pediococcus\_s\_Pediococcus\_lolii  
 PWY\_1042\_glycolysis\_IV\_(plant\_cytosol)\_g\_Peptostreptococcaceae\_noname\_s\_Clostridium\_ba  
 PWY\_1042\_glycolysis\_IV\_(plant\_cytosol)\_g\_Ruminococcus\_s\_Ruminococcus\_champanellensis  
 PWY\_1042\_glycolysis\_IV\_(plant\_cytosol)\_g\_Ruminococcus\_s\_Ruminococcus\_sp  
 PWY\_1042\_glycolysis\_IV\_(plant\_cytosol)\_g\_Streptococcus\_s\_Streptococcus\_australis  
 PWY\_1042\_glycolysis\_IV\_(plant\_cytosol)\_g\_Streptococcus\_s\_Streptococcus\_mitis\_oralis\_pneu  
 PWY\_1269\_CMP\_3\_deoxy\_D\_manno\_octulosonate\_biosynthesis\_I\_g\_Akkermansia\_s\_Akkermansia\_muciniphila  
 PWY\_1269\_CMP\_3\_deoxy\_D\_manno\_octulosonate\_biosynthesis\_I\_g\_Alistipes\_s\_Alistipes\_senegalensis  
 PWY\_1269\_CMP\_3\_deoxy\_D\_manno\_octulosonate\_biosynthesis\_I\_g\_Alistipes\_s\_Alistipes\_shahii  
 PWY\_1269\_CMP\_3\_deoxy\_D\_manno\_octulosonate\_biosynthesis\_I\_g\_Bacteroides\_s\_Bacteroides\_coprocola

PWY\_1269\_\_CMP\_3\_deoxy\_D\_manno\_octulosonate\_biosynthesis\_I\_g\_\_Bacteroides\_s\_\_Bacteroid  
PWY\_1269\_\_CMP\_3\_deoxy\_D\_manno\_octulosonate\_biosynthesis\_I\_g\_\_Bacteroides\_s\_\_Bacteroid  
PWY\_1269\_\_CMP\_3\_deoxy\_D\_manno\_octulosonate\_biosynthesis\_I\_g\_\_Bacteroides\_s\_\_Bacteroid  
PWY\_1269\_\_CMP\_3\_deoxy\_D\_manno\_octulosonate\_biosynthesis\_I\_g\_\_Bacteroides\_s\_\_Bacteroid  
PWY\_1269\_\_CMP\_3\_deoxy\_D\_manno\_octulosonate\_biosynthesis\_I\_g\_\_Bacteroides\_s\_\_Bacteroid  
PWY\_1269\_\_CMP\_3\_deoxy\_D\_manno\_octulosonate\_biosynthesis\_I\_g\_\_Bacteroides\_s\_\_Bacteroid  
PWY\_1269\_\_CMP\_3\_deoxy\_D\_manno\_octulosonate\_biosynthesis\_I\_g\_\_Bacteroides\_s\_\_Bacteroid  
PWY\_1269\_\_CMP\_3\_deoxy\_D\_manno\_octulosonate\_biosynthesis\_I\_g\_\_Bacteroides\_s\_\_Bacteroid  
PWY\_1269\_\_CMP\_3\_deoxy\_D\_manno\_octulosonate\_biosynthesis\_I\_g\_\_Bacteroides\_s\_\_Bacteroid  
PWY\_1269\_\_CMP\_3\_deoxy\_D\_manno\_octulosonate\_biosynthesis\_I\_g\_\_Citrobacter\_s\_\_Citrobacte  
PWY\_1269\_\_CMP\_3\_deoxy\_D\_manno\_octulosonate\_biosynthesis\_I\_g\_\_Odoribacter\_s\_\_Odoribac  
PWY\_1269\_\_CMP\_3\_deoxy\_D\_manno\_octulosonate\_biosynthesis\_I\_g\_\_Oxalobacter\_s\_\_Oxalobac  
PWY\_1861\_\_formaldehyde\_assimilation\_II\_(RuMP\_Cycle)\_g\_\_Blautia\_s\_\_Ruminococcus\_obeum  
PWY\_1861\_\_formaldehyde\_assimilation\_II\_(RuMP\_Cycle)\_unclassified  
PWY\_2941\_\_L\_lysine\_biosynthesis\_II\_g\_\_Catenibacterium\_s\_\_Catenibacterium\_mitsuokai  
PWY\_2941\_\_L\_lysine\_biosynthesis\_II\_g\_\_Enterococcus\_s\_\_Enterococcus\_durans  
PWY\_2941\_\_L\_lysine\_biosynthesis\_II\_g\_\_Enterococcus\_s\_\_Enterococcus\_faecalis  
PWY\_2941\_\_L\_lysine\_biosynthesis\_II\_g\_\_Erysipelotrichaceae\_noname\_s\_\_Clostridium\_spiroforme  
PWY\_2941\_\_L\_lysine\_biosynthesis\_II\_g\_\_Erysipelotrichaceae\_noname\_s\_\_Erysipelotrichaceae\_ba  
PWY\_2941\_\_L\_lysine\_biosynthesis\_II\_g\_\_Lactobacillus\_s\_\_Lactobacillus\_casei\_paracasei  
PWY\_2941\_\_L\_lysine\_biosynthesis\_II\_g\_\_Lactobacillus\_s\_\_Lactobacillus\_fermentum  
PWY\_2941\_\_L\_lysine\_biosynthesis\_II\_g\_\_Lactococcus\_s\_\_Lactococcus\_lactis  
PWY\_2941\_\_L\_lysine\_biosynthesis\_II\_g\_\_Odoribacter\_s\_\_Odoribacter\_splanchnicus  
PWY\_2941\_\_L\_lysine\_biosynthesis\_II\_g\_\_Peptostreptococcaceae\_noname\_s\_\_Clostridium\_bartlet  
PWY\_2942\_\_L\_lysine\_biosynthesis\_III\_g\_\_Adlercreutzia\_s\_\_Adlercreutzia\_equolifaciens  
PWY\_2942\_\_L\_lysine\_biosynthesis\_III\_g\_\_Akkermansia\_s\_\_Akkermansia\_muciniphila  
PWY\_2942\_\_L\_lysine\_biosynthesis\_III\_g\_\_Alistipes\_s\_\_Alistipes\_indistinctus  
PWY\_2942\_\_L\_lysine\_biosynthesis\_III\_g\_\_Anaerostipes\_s\_\_Anaerostipes\_hadrus  
PWY\_2942\_\_L\_lysine\_biosynthesis\_III\_g\_\_Anaerotruncus\_s\_\_Anaerotruncus\_colihominis  
PWY\_2942\_\_L\_lysine\_biosynthesis\_III\_g\_\_Bacteroides\_s\_\_Bacteroides\_cellulosilyticus  
PWY\_2942\_\_L\_lysine\_biosynthesis\_III\_g\_\_Bacteroides\_s\_\_Bacteroides\_clarus  
PWY\_2942\_\_L\_lysine\_biosynthesis\_III\_g\_\_Bacteroides\_s\_\_Bacteroides\_coprocola  
PWY\_2942\_\_L\_lysine\_biosynthesis\_III\_g\_\_Bacteroides\_s\_\_Bacteroides\_dorei  
PWY\_2942\_\_L\_lysine\_biosynthesis\_III\_g\_\_Bacteroides\_s\_\_Bacteroides\_eggerthii  
PWY\_2942\_\_L\_lysine\_biosynthesis\_III\_g\_\_Bacteroides\_s\_\_Bacteroides\_faecis  
PWY\_2942\_\_L\_lysine\_biosynthesis\_III\_g\_\_Bacteroides\_s\_\_Bacteroides\_finegoldii  
PWY\_2942\_\_L\_lysine\_biosynthesis\_III\_g\_\_Bacteroides\_s\_\_Bacteroides\_intestinalis  
PWY\_2942\_\_L\_lysine\_biosynthesis\_III\_g\_\_Bacteroides\_s\_\_Bacteroides\_massiliensis  
PWY\_2942\_\_L\_lysine\_biosynthesis\_III\_g\_\_Bacteroides\_s\_\_Bacteroides\_ovatus  
PWY\_2942\_\_L\_lysine\_biosynthesis\_III\_g\_\_Bacteroides\_s\_\_Bacteroides\_plebeius  
PWY\_2942\_\_L\_lysine\_biosynthesis\_III\_g\_\_Bacteroides\_s\_\_Bacteroides\_salyersiae  
PWY\_2942\_\_L\_lysine\_biosynthesis\_III\_g\_\_Bacteroides\_s\_\_Bacteroides\_sp\_1\_1\_30  
PWY\_2942\_\_L\_lysine\_biosynthesis\_III\_g\_\_Bacteroides\_s\_\_Bacteroides\_sp\_1\_1\_6  
PWY\_2942\_\_L\_lysine\_biosynthesis\_III\_g\_\_Bacteroides\_s\_\_Bacteroides\_sp\_2\_1\_22  
PWY\_2942\_\_L\_lysine\_biosynthesis\_III\_g\_\_Bacteroides\_s\_\_Bacteroides\_sp\_2\_2\_4  
PWY\_2942\_\_L\_lysine\_biosynthesis\_III\_g\_\_Bacteroides\_s\_\_Bacteroides\_sp\_3\_1\_19  
PWY\_2942\_\_L\_lysine\_biosynthesis\_III\_g\_\_Bacteroides\_s\_\_Bacteroides\_sp\_3\_1\_23

|                                                                                           |
|-------------------------------------------------------------------------------------------|
| PWY_2942__L_lysine_biosynthesis_III_g_Bacteroides_s_Bacteroides_sp_3_1_33FAA              |
| PWY_2942__L_lysine_biosynthesis_III_g_Bacteroides_s_Bacteroides_sp_3_1_40A                |
| PWY_2942__L_lysine_biosynthesis_III_g_Bacteroides_s_Bacteroides_sp_4_3_47FAA              |
| PWY_2942__L_lysine_biosynthesis_III_g_Bacteroides_s_Bacteroides_sp_9_1_42FAA              |
| PWY_2942__L_lysine_biosynthesis_III_g_Bacteroides_s_Bacteroides_sp_D20                    |
| PWY_2942__L_lysine_biosynthesis_III_g_Bacteroides_s_Bacteroides_stercoris                 |
| PWY_2942__L_lysine_biosynthesis_III_g_Bacteroides_s_Bacteroides_thetaiotaomicron          |
| PWY_2942__L_lysine_biosynthesis_III_g_Bacteroides_s_Bacteroides_uniformis                 |
| PWY_2942__L_lysine_biosynthesis_III_g_Bacteroides_s_Bacteroides_xylanisolvans             |
| PWY_2942__L_lysine_biosynthesis_III_g_Barnesiella_s_Barnesiella_intestinihominis          |
| PWY_2942__L_lysine_biosynthesis_III_g_Bifidobacterium_s_Bifidobacterium_animalis          |
| PWY_2942__L_lysine_biosynthesis_III_g_Bilophila_s_Bilophila_wadsworthia                   |
| PWY_2942__L_lysine_biosynthesis_III_g_Blautia_s_Ruminococcus_gnavus                       |
| PWY_2942__L_lysine_biosynthesis_III_g_Blautia_s_Ruminococcus_obeum                        |
| PWY_2942__L_lysine_biosynthesis_III_g_Burkholderiales_noname_s_Burkholderiales_bacterium  |
| PWY_2942__L_lysine_biosynthesis_III_g_Catenibacterium_s_Catenibacterium_mitsuokai         |
| PWY_2942__L_lysine_biosynthesis_III_g_Citrobacter_s_Citrobacter_freundii                  |
| PWY_2942__L_lysine_biosynthesis_III_g_Clostridium_s_Clostridium_asparagiforme             |
| PWY_2942__L_lysine_biosynthesis_III_g_Clostridium_s_Clostridium_hathewayi                 |
| PWY_2942__L_lysine_biosynthesis_III_g_Clostridium_s_Clostridium_sp_SS2_1                  |
| PWY_2942__L_lysine_biosynthesis_III_g_Coprobacter_s_Coprobacter_fastidiosus               |
| PWY_2942__L_lysine_biosynthesis_III_g_Coprococcus_s_Coprococcus_catus                     |
| PWY_2942__L_lysine_biosynthesis_III_g_Coprococcus_s_Coprococcus_eutactus                  |
| PWY_2942__L_lysine_biosynthesis_III_g_Coprococcus_s_Coprococcus_sp_ART55_1                |
| PWY_2942__L_lysine_biosynthesis_III_g_Dialister_s_Dialister_invisus                       |
| PWY_2942__L_lysine_biosynthesis_III_g_Eggerthella_s_Eggerthella_lenta                     |
| PWY_2942__L_lysine_biosynthesis_III_g_Eggerthella_s_Eggerthella_sp_1_3_56FAA              |
| PWY_2942__L_lysine_biosynthesis_III_g_Eggerthella_s_Eggerthella_sp_HGA1                   |
| PWY_2942__L_lysine_biosynthesis_III_g_Enterococcus_s_Enterococcus_durans                  |
| PWY_2942__L_lysine_biosynthesis_III_g_Enterorhabdus_s_Enterorhabdus_caecimuris            |
| PWY_2942__L_lysine_biosynthesis_III_g_Erysipelotrichaceae_noname_s_Clostridium_spiroform  |
| PWY_2942__L_lysine_biosynthesis_III_g_Erysipelotrichaceae_noname_s_Erysipelotrichaceae_ba |
| PWY_2942__L_lysine_biosynthesis_III_g_Eubacterium_s_Eubacterium_siraeum                   |
| PWY_2942__L_lysine_biosynthesis_III_g_Eubacterium_s_Eubacterium_sp_3_1_31                 |
| PWY_2942__L_lysine_biosynthesis_III_g_Faecalibacterium_s_Faecalibacterium_prausnitzii     |
| PWY_2942__L_lysine_biosynthesis_III_g_Gemella_s_Gemella_sanguinis                         |
| PWY_2942__L_lysine_biosynthesis_III_g_Gordonibacter_s_Gordonibacter_pamelaeae             |
| PWY_2942__L_lysine_biosynthesis_III_g_Lachnospiraceae_noname_s_Lachnospiraceae_bacteri    |
| PWY_2942__L_lysine_biosynthesis_III_g_Lachnospiraceae_noname_s_Lachnospiraceae_bacteri    |
| PWY_2942__L_lysine_biosynthesis_III_g_Lachnospiraceae_noname_s_Lachnospiraceae_bacteri    |
| PWY_2942__L_lysine_biosynthesis_III_g_Lachnospiraceae_noname_s_Lachnospiraceae_bacteri    |
| PWY_2942__L_lysine_biosynthesis_III_g_Lactobacillus_s_Lactobacillus_casei_paracasei       |
| PWY_2942__L_lysine_biosynthesis_III_g_Lactobacillus_s_Lactobacillus_fermentum             |
| PWY_2942__L_lysine_biosynthesis_III_g_Lactococcus_s_Lactococcus_lactis                    |
| PWY_2942__L_lysine_biosynthesis_III_g_Odoribacter_s_Odoribacter_laneus                    |
| PWY_2942__L_lysine_biosynthesis_III_g_Odoribacter_s_Odoribacter_splanchnicus              |
| PWY_2942__L_lysine_biosynthesis_III_g_Oxalobacter_s_Oxalobacter_formigenes                |

PWY\_2942\_\_L\_lysine\_biosynthesis\_III\_g\_\_Parabacteroides\_s\_\_Parabacteroides\_distasonis  
PWY\_2942\_\_L\_lysine\_biosynthesis\_III\_g\_\_Parabacteroides\_s\_\_Parabacteroides\_goldsteinii  
PWY\_2942\_\_L\_lysine\_biosynthesis\_III\_g\_\_Parabacteroides\_s\_\_Parabacteroides\_johnsonii  
PWY\_2942\_\_L\_lysine\_biosynthesis\_III\_g\_\_Parabacteroides\_s\_\_Parabacteroides\_merdae  
PWY\_2942\_\_L\_lysine\_biosynthesis\_III\_g\_\_Parabacteroides\_s\_\_Parabacteroides\_sp\_20\_3  
PWY\_2942\_\_L\_lysine\_biosynthesis\_III\_g\_\_Parabacteroides\_s\_\_Parabacteroides\_sp\_D13  
PWY\_2942\_\_L\_lysine\_biosynthesis\_III\_g\_\_Paraprevotella\_s\_\_Paraprevotella\_clara  
PWY\_2942\_\_L\_lysine\_biosynthesis\_III\_g\_\_Paraprevotella\_s\_\_Paraprevotella\_xylaniphila  
PWY\_2942\_\_L\_lysine\_biosynthesis\_III\_g\_\_Peptostreptococcaceae\_noname\_s\_\_Clostridium\_bartle  
PWY\_2942\_\_L\_lysine\_biosynthesis\_III\_g\_\_Prevotella\_s\_\_Prevotella\_copri  
PWY\_2942\_\_L\_lysine\_biosynthesis\_III\_g\_\_Propionibacterium\_s\_\_Propionibacterium\_freudenreich  
PWY\_2942\_\_L\_lysine\_biosynthesis\_III\_g\_\_Ruminococcus\_s\_\_Ruminococcus\_champanellensis  
PWY\_2942\_\_L\_lysine\_biosynthesis\_III\_g\_\_Ruminococcus\_s\_\_Ruminococcus\_lactaris  
PWY\_2942\_\_L\_lysine\_biosynthesis\_III\_g\_\_Veillonella\_s\_\_Veillonella\_dispar  
PWY\_2942\_\_L\_lysine\_biosynthesis\_III\_g\_\_Veillonella\_s\_\_Veillonella\_parvula  
PWY\_3001\_\_superpathway\_of\_L\_ileucine\_biosynthesis\_I\_g\_\_Citrobacter\_s\_\_Citrobacter\_freund  
PWY\_3001\_\_superpathway\_of\_L\_ileucine\_biosynthesis\_I\_g\_\_Coproccoccus\_s\_\_Coproccoccus\_cat  
PWY\_3001\_\_superpathway\_of\_L\_ileucine\_biosynthesis\_I\_g\_\_Coproccoccus\_s\_\_Coproccoccus\_eut  
PWY\_3001\_\_superpathway\_of\_L\_ileucine\_biosynthesis\_I\_g\_\_Coproccoccus\_s\_\_Coproccoccus\_sp\_  
PWY\_3001\_\_superpathway\_of\_L\_ileucine\_biosynthesis\_I\_g\_\_Enterobacter\_s\_\_Enterobacter\_clo  
PWY\_3001\_\_superpathway\_of\_L\_ileucine\_biosynthesis\_I\_g\_\_Lactococcus\_s\_\_Lactococcus\_lactis  
PWY\_3001\_\_superpathway\_of\_L\_ileucine\_biosynthesis\_I\_g\_\_Propionibacterium\_s\_\_Propioniba  
PWY\_3001\_\_superpathway\_of\_L\_ileucine\_biosynthesis\_I\_g\_\_Streptococcus\_s\_\_Streptococcus\_r  
PWY\_3781\_\_aerobic\_respiration\_I\_(cytochrome\_c)\_g\_\_Nakaseomyces\_s\_\_Candida\_glabrata  
PWY\_3801\_\_sucrose\_degradation\_II\_(sucrose\_synthase)  
PWY\_3801\_\_sucrose\_degradation\_II\_(sucrose\_synthase)\_unclassified  
PWY\_3841\_\_folate\_transformations\_II\_g\_\_Akkermansia\_s\_\_Akkermansia\_muciniphila  
PWY\_3841\_\_folate\_transformations\_II\_g\_\_Bacteroides\_s\_\_Bacteroides\_cellulosilyticus  
PWY\_3841\_\_folate\_transformations\_II\_g\_\_Bacteroides\_s\_\_Bacteroides\_clarus  
PWY\_3841\_\_folate\_transformations\_II\_g\_\_Bacteroides\_s\_\_Bacteroides\_coprocola  
PWY\_3841\_\_folate\_transformations\_II\_g\_\_Bacteroides\_s\_\_Bacteroides\_dorei  
PWY\_3841\_\_folate\_transformations\_II\_g\_\_Bacteroides\_s\_\_Bacteroides\_faecis  
PWY\_3841\_\_folate\_transformations\_II\_g\_\_Bacteroides\_s\_\_Bacteroides\_finegoldii  
PWY\_3841\_\_folate\_transformations\_II\_g\_\_Bacteroides\_s\_\_Bacteroides\_fragilis  
PWY\_3841\_\_folate\_transformations\_II\_g\_\_Bacteroides\_s\_\_Bacteroides\_intestinalis  
PWY\_3841\_\_folate\_transformations\_II\_g\_\_Bacteroides\_s\_\_Bacteroides\_massiliensis  
PWY\_3841\_\_folate\_transformations\_II\_g\_\_Bacteroides\_s\_\_Bacteroides\_ovatus  
PWY\_3841\_\_folate\_transformations\_II\_g\_\_Bacteroides\_s\_\_Bacteroides\_sp\_1\_1\_30  
PWY\_3841\_\_folate\_transformations\_II\_g\_\_Bacteroides\_s\_\_Bacteroides\_sp\_1\_1\_6  
PWY\_3841\_\_folate\_transformations\_II\_g\_\_Bacteroides\_s\_\_Bacteroides\_sp\_2\_1\_22  
PWY\_3841\_\_folate\_transformations\_II\_g\_\_Bacteroides\_s\_\_Bacteroides\_sp\_2\_2\_4  
PWY\_3841\_\_folate\_transformations\_II\_g\_\_Bacteroides\_s\_\_Bacteroides\_sp\_3\_1\_19  
PWY\_3841\_\_folate\_transformations\_II\_g\_\_Bacteroides\_s\_\_Bacteroides\_sp\_3\_1\_23  
PWY\_3841\_\_folate\_transformations\_II\_g\_\_Bacteroides\_s\_\_Bacteroides\_sp\_3\_1\_33FAA  
PWY\_3841\_\_folate\_transformations\_II\_g\_\_Bacteroides\_s\_\_Bacteroides\_sp\_3\_1\_40A  
PWY\_3841\_\_folate\_transformations\_II\_g\_\_Bacteroides\_s\_\_Bacteroides\_sp\_4\_3\_47FAA  
PWY\_3841\_\_folate\_transformations\_II\_g\_\_Bacteroides\_s\_\_Bacteroides\_sp\_9\_1\_42FAA

PWY\_3841\_\_folate\_transformations\_II\_g\_\_Bacteroides\_s\_\_Bacteroides\_sp\_D20

PWY\_3841\_\_folate\_transformations\_II\_g\_\_Bacteroides\_s\_\_Bacteroides\_stercoris

PWY\_3841\_\_folate\_transformations\_II\_g\_\_Bacteroides\_s\_\_Bacteroides\_thetaiotaomicron

PWY\_3841\_\_folate\_transformations\_II\_g\_\_Bacteroides\_s\_\_Bacteroides\_uniformis

PWY\_3841\_\_folate\_transformations\_II\_g\_\_Bacteroides\_s\_\_Bacteroides\_xylanisolvens

PWY\_3841\_\_folate\_transformations\_II\_g\_\_Citrobacter\_s\_\_Citrobacter\_freundii

PWY\_3841\_\_folate\_transformations\_II\_g\_\_Enterobacter\_s\_\_Enterobacter\_cloacae

PWY\_3841\_\_folate\_transformations\_II\_g\_\_Enterococcus\_s\_\_Enterococcus\_faecalis

PWY\_3841\_\_folate\_transformations\_II\_g\_\_Enterococcus\_s\_\_Enterococcus\_faecium

PWY\_3841\_\_folate\_transformations\_II\_g\_\_Klebsiella\_s\_\_Klebsiella\_pneumoniae

PWY\_3841\_\_folate\_transformations\_II\_g\_\_Lactobacillus\_s\_\_Lactobacillus\_brevis

PWY\_3841\_\_folate\_transformations\_II\_g\_\_Lactobacillus\_s\_\_Lactobacillus\_casei\_paracasei

PWY\_3841\_\_folate\_transformations\_II\_g\_\_Lactobacillus\_s\_\_Lactobacillus\_fermentum

PWY\_3841\_\_folate\_transformations\_II\_g\_\_Lactococcus\_s\_\_Lactococcus\_lactis

PWY\_3841\_\_folate\_transformations\_II\_g\_\_Parabacteroides\_s\_\_Parabacteroides\_distasonis

PWY\_3841\_\_folate\_transformations\_II\_g\_\_Parabacteroides\_s\_\_Parabacteroides\_goldsteinii

PWY\_3841\_\_folate\_transformations\_II\_g\_\_Parabacteroides\_s\_\_Parabacteroides\_johnsonii

PWY\_3841\_\_folate\_transformations\_II\_g\_\_Parabacteroides\_s\_\_Parabacteroides\_merdae

PWY\_3841\_\_folate\_transformations\_II\_g\_\_Parabacteroides\_s\_\_Parabacteroides\_sp\_20\_3

PWY\_3841\_\_folate\_transformations\_II\_g\_\_Parabacteroides\_s\_\_Parabacteroides\_sp\_D13

PWY\_3841\_\_folate\_transformations\_II\_g\_\_Streptococcus\_s\_\_Streptococcus\_mitis\_oralis\_pneumo

PWY\_3841\_\_folate\_transformations\_II\_g\_\_Streptococcus\_s\_\_Streptococcus\_sanguinis

PWY\_4041\_\_&gamma\_\_glutamyl\_cycle\_g\_\_Citrobacter\_s\_\_Citrobacter\_freundii

PWY\_4041\_\_&gamma\_\_glutamyl\_cycle\_g\_\_Klebsiella\_s\_\_Klebsiella\_pneumoniae

PWY\_4242\_\_pantothenate\_and\_coenzyme\_A\_biosynthesis\_III\_g\_\_Actinomyces\_s\_\_Actinomyces

PWY\_4242\_\_pantothenate\_and\_coenzyme\_A\_biosynthesis\_III\_g\_\_Akkermansia\_s\_\_Akkermansia

PWY\_4242\_\_pantothenate\_and\_coenzyme\_A\_biosynthesis\_III\_g\_\_Anaerofustis\_s\_\_Anaerofustis\_s

PWY\_4242\_\_pantothenate\_and\_coenzyme\_A\_biosynthesis\_III\_g\_\_Anaerotruncus\_s\_\_Anaerotrunc

PWY\_4242\_\_pantothenate\_and\_coenzyme\_A\_biosynthesis\_III\_g\_\_Bacteroides\_s\_\_Bacteroides\_ov

PWY\_4242\_\_pantothenate\_and\_coenzyme\_A\_biosynthesis\_III\_g\_\_Bacteroides\_s\_\_Bacteroides\_sp

PWY\_4242\_\_pantothenate\_and\_coenzyme\_A\_biosynthesis\_III\_g\_\_Bacteroides\_s\_\_Bacteroides\_sp

PWY\_4242\_\_pantothenate\_and\_coenzyme\_A\_biosynthesis\_III\_g\_\_Bacteroides\_s\_\_Bacteroides\_sp

PWY\_4242\_\_pantothenate\_and\_coenzyme\_A\_biosynthesis\_III\_g\_\_Bacteroides\_s\_\_Bacteroides\_sp

PWY\_4242\_\_pantothenate\_and\_coenzyme\_A\_biosynthesis\_III\_g\_\_Bacteroides\_s\_\_Bacteroides\_xy

PWY\_4242\_\_pantothenate\_and\_coenzyme\_A\_biosynthesis\_III\_g\_\_Citrobacter\_s\_\_Citrobacter\_fre

PWY\_4242\_\_pantothenate\_and\_coenzyme\_A\_biosynthesis\_III\_g\_\_Clostridiales\_noname\_s\_\_Clost

PWY\_4242\_\_pantothenate\_and\_coenzyme\_A\_biosynthesis\_III\_g\_\_Eggerthella\_s\_\_Eggerthella\_len

PWY\_4242\_\_pantothenate\_and\_coenzyme\_A\_biosynthesis\_III\_g\_\_Eggerthella\_s\_\_Eggerthella\_sp

PWY\_4242\_\_pantothenate\_and\_coenzyme\_A\_biosynthesis\_III\_g\_\_Eggerthella\_s\_\_Eggerthella\_sp

PWY\_4242\_\_pantothenate\_and\_coenzyme\_A\_biosynthesis\_III\_g\_\_Erysipelotrichaceae\_noname\_s

PWY\_4242\_\_pantothenate\_and\_coenzyme\_A\_biosynthesis\_III\_g\_\_Eubacterium\_s\_\_Eubacterium

PWY\_4242\_\_pantothenate\_and\_coenzyme\_A\_biosynthesis\_III\_g\_\_Lactobacillus\_s\_\_Lactobacillus

PWY\_4242\_\_pantothenate\_and\_coenzyme\_A\_biosynthesis\_III\_g\_\_Lactococcus\_s\_\_Lactococcus\_la

PWY\_4242\_\_pantothenate\_and\_coenzyme\_A\_biosynthesis\_III\_g\_\_Oxalobacter\_s\_\_Oxalobacter\_fc

PWY\_4242\_\_pantothenate\_and\_coenzyme\_A\_biosynthesis\_III\_g\_\_Pediococcus\_s\_\_Pediococcus\_a

PWY\_4242\_\_pantothenate\_and\_coenzyme\_A\_biosynthesis\_III\_g\_\_Pediococcus\_s\_\_Pediococcus\_lc

PWY\_4242\_\_pantothenate\_and\_coenzyme\_A\_biosynthesis\_III\_g\_\_Phascolarctobacterium\_s\_\_Pha

PWY\_4242\_pantothenate\_and\_coenzyme\_A\_biosynthesis\_III\_g\_Streptococcus\_s\_Streptococcus

PWY\_4242\_pantothenate\_and\_coenzyme\_A\_biosynthesis\_III\_g\_Streptococcus\_s\_Streptococcus

PWY\_4242\_pantothenate\_and\_coenzyme\_A\_biosynthesis\_III\_g\_Veillonella\_s\_Veillonella\_dispar

PWY\_4242\_pantothenate\_and\_coenzyme\_A\_biosynthesis\_III\_g\_Veillonella\_s\_Veillonella\_parvula

PWY\_4321\_L\_glutamate\_degradation\_IV

PWY\_4321\_L\_glutamate\_degradation\_IV\_unclassified

PWY\_4361\_S\_methyl\_5\_thio\_alpha\_D\_ribose\_1\_phosphate\_degradation

PWY\_4361\_S\_methyl\_5\_thio\_alpha\_D\_ribose\_1\_phosphate\_degradation\_unclassified

PWY\_4702\_phytate\_degradation\_I\_g\_Akkermansia\_s\_Akkermansia\_muciniphila

PWY\_4702\_phytate\_degradation\_I\_unclassified

PWY\_4981\_L\_proline\_biosynthesis\_II\_(from\_arginine)\_g\_Adlercreutzia\_s\_Adlercreutzia\_equol

PWY\_4981\_L\_proline\_biosynthesis\_II\_(from\_arginine)\_g>Anaerofustis\_s>Anaerofustis\_stercorarius

PWY\_4981\_L\_proline\_biosynthesis\_II\_(from\_arginine)\_g\_Clostridiales\_noname\_s\_Clostridiales

PWY\_4981\_L\_proline\_biosynthesis\_II\_(from\_arginine)\_g\_Clostridium\_s\_Clostridium\_asparagiflavum

PWY\_4981\_L\_proline\_biosynthesis\_II\_(from\_arginine)\_g\_Clostridium\_s\_Clostridium\_citroniae

PWY\_4981\_L\_proline\_biosynthesis\_II\_(from\_arginine)\_g\_Clostridium\_s\_Clostridium\_perfringens

PWY\_4981\_L\_proline\_biosynthesis\_II\_(from\_arginine)\_g\_Collinsella\_s\_Collinsella\_tanakaei

PWY\_4981\_L\_proline\_biosynthesis\_II\_(from\_arginine)\_g\_Eggerthella\_s\_Eggerthella\_lenta

PWY\_4981\_L\_proline\_biosynthesis\_II\_(from\_arginine)\_g\_Eggerthella\_s\_Eggerthella\_sp\_1\_3\_51

PWY\_4981\_L\_proline\_biosynthesis\_II\_(from\_arginine)\_g\_Eggerthella\_s\_Eggerthella\_sp\_HGA1

PWY\_4981\_L\_proline\_biosynthesis\_II\_(from\_arginine)\_g\_Enterobacter\_s\_Enterobacter\_cloacae

PWY\_4981\_L\_proline\_biosynthesis\_II\_(from\_arginine)\_g\_Enterococcus\_s\_Enterococcus\_faecium

PWY\_4981\_L\_proline\_biosynthesis\_II\_(from\_arginine)\_g\_Enterorhabdus\_s\_Enterorhabdus\_caerulius

PWY\_4981\_L\_proline\_biosynthesis\_II\_(from\_arginine)\_g\_Escherichia\_s\_Escherichia\_coli

PWY\_4981\_L\_proline\_biosynthesis\_II\_(from\_arginine)\_g>Eubacterium\_s>Eubacterium\_ramulorum

PWY\_4981\_L\_proline\_biosynthesis\_II\_(from\_arginine)\_g>Lactobacillus\_s>Lactobacillus\_brevis

PWY\_4981\_L\_proline\_biosynthesis\_II\_(from\_arginine)\_g>Lactobacillus\_s>Lactobacillus\_fermentum

PWY\_4981\_L\_proline\_biosynthesis\_II\_(from\_arginine)\_g>Odoribacter\_s>Odoribacter\_splanchnicus

PWY\_4981\_L\_proline\_biosynthesis\_II\_(from\_arginine)\_g>Pediococcus\_s>Pediococcus\_acidilactici

PWY\_4981\_L\_proline\_biosynthesis\_II\_(from\_arginine)\_g>Pediococcus\_s>Pediococcus\_lolii

PWY\_4981\_L\_proline\_biosynthesis\_II\_(from\_arginine)\_g>Slackia\_s>Slackia\_piriformis

PWY\_4984\_urea\_cycle\_g>Coprococcus\_s>Coprococcus\_catus

PWY\_4984\_urea\_cycle\_g>Lachnospiraceae\_noname\_s>Lachnospiraceae\_bacterium\_7\_1\_58FA

PWY\_5004\_superpathway\_of\_L\_citrulline\_metabolism

PWY\_5005\_biotin\_biosynthesis\_II\_g\_Veillonella\_s\_Veillonella\_dispar

PWY\_5005\_biotin\_biosynthesis\_II\_g\_Veillonella\_s\_Veillonella\_parvula

PWY\_5022\_4\_aminobutanoate\_degradation\_V\_g>Klebsiella\_s>Klebsiella\_pneumoniae

PWY\_5022\_4\_aminobutanoate\_degradation\_V\_unclassified

PWY\_5083\_NAD\_NADH\_phosphorylation\_and\_dephosphorylation\_g>Citrobacter\_s>Citrobacter

PWY\_5083\_NAD\_NADH\_phosphorylation\_and\_dephosphorylation\_g\_Enterobacter\_s\_Enterobacter

PWY\_5083\_NAD\_NADH\_phosphorylation\_and\_dephosphorylation\_g>Klebsiella\_s>Klebsiella\_pneumoniae

PWY\_5088\_L\_glutamate\_degradation\_VIII\_(to\_propanoate)

PWY\_5097\_L\_lysine\_biosynthesis\_VI\_g\_Adlercreutzia\_s\_Adlercreutzia\_equolifaciens

PWY\_5097\_L\_lysine\_biosynthesis\_VI\_g\_Akkermansia\_s\_Akkermansia\_muciniphila

PWY\_5097\_L\_lysine\_biosynthesis\_VI\_g>Alistipes\_s>Alistipes\_indistinctus

PWY\_5097\_L\_lysine\_biosynthesis\_VI\_g>Anaerostipes\_s>Anaerostipes\_hadrus

PWY\_5097\_L\_lysine\_biosynthesis\_VI\_g>Anaerotruncus\_s>Anaerotruncus\_colihominis

PWY\_5097\_\_L\_lysine\_biosynthesis\_VI\_g\_Bacteroides\_s\_Bacteroides\_cellulosilyticus  
PWY\_5097\_\_L\_lysine\_biosynthesis\_VI\_g\_Bacteroides\_s\_Bacteroides\_clarus  
PWY\_5097\_\_L\_lysine\_biosynthesis\_VI\_g\_Bacteroides\_s\_Bacteroides\_coprocola  
PWY\_5097\_\_L\_lysine\_biosynthesis\_VI\_g\_Bacteroides\_s\_Bacteroides\_eggerthii  
PWY\_5097\_\_L\_lysine\_biosynthesis\_VI\_g\_Bacteroides\_s\_Bacteroides\_faecis  
PWY\_5097\_\_L\_lysine\_biosynthesis\_VI\_g\_Bacteroides\_s\_Bacteroides\_finegoldii  
PWY\_5097\_\_L\_lysine\_biosynthesis\_VI\_g\_Bacteroides\_s\_Bacteroides\_intestinalis  
PWY\_5097\_\_L\_lysine\_biosynthesis\_VI\_g\_Bacteroides\_s\_Bacteroides\_massiliensis  
PWY\_5097\_\_L\_lysine\_biosynthesis\_VI\_g\_Bacteroides\_s\_Bacteroides\_ovatus  
PWY\_5097\_\_L\_lysine\_biosynthesis\_VI\_g\_Bacteroides\_s\_Bacteroides\_plebeius  
PWY\_5097\_\_L\_lysine\_biosynthesis\_VI\_g\_Bacteroides\_s\_Bacteroides\_salyersiae  
PWY\_5097\_\_L\_lysine\_biosynthesis\_VI\_g\_Bacteroides\_s\_Bacteroides\_sp\_1\_1\_30  
PWY\_5097\_\_L\_lysine\_biosynthesis\_VI\_g\_Bacteroides\_s\_Bacteroides\_sp\_1\_1\_6  
PWY\_5097\_\_L\_lysine\_biosynthesis\_VI\_g\_Bacteroides\_s\_Bacteroides\_sp\_2\_1\_22  
PWY\_5097\_\_L\_lysine\_biosynthesis\_VI\_g\_Bacteroides\_s\_Bacteroides\_sp\_2\_2\_4  
PWY\_5097\_\_L\_lysine\_biosynthesis\_VI\_g\_Bacteroides\_s\_Bacteroides\_sp\_3\_1\_19  
PWY\_5097\_\_L\_lysine\_biosynthesis\_VI\_g\_Bacteroides\_s\_Bacteroides\_sp\_3\_1\_23  
PWY\_5097\_\_L\_lysine\_biosynthesis\_VI\_g\_Bacteroides\_s\_Bacteroides\_sp\_3\_1\_40A  
PWY\_5097\_\_L\_lysine\_biosynthesis\_VI\_g\_Bacteroides\_s\_Bacteroides\_sp\_4\_3\_47FAA  
PWY\_5097\_\_L\_lysine\_biosynthesis\_VI\_g\_Bacteroides\_s\_Bacteroides\_sp\_D20  
PWY\_5097\_\_L\_lysine\_biosynthesis\_VI\_g\_Bacteroides\_s\_Bacteroides\_stercoris  
PWY\_5097\_\_L\_lysine\_biosynthesis\_VI\_g\_Bacteroides\_s\_Bacteroides\_thetaiotaomicron  
PWY\_5097\_\_L\_lysine\_biosynthesis\_VI\_g\_Bacteroides\_s\_Bacteroides\_uniformis  
PWY\_5097\_\_L\_lysine\_biosynthesis\_VI\_g\_Bacteroides\_s\_Bacteroides\_xylanisolvans  
PWY\_5097\_\_L\_lysine\_biosynthesis\_VI\_g\_Barnesiella\_s\_Barnesiella\_intestinihominis  
PWY\_5097\_\_L\_lysine\_biosynthesis\_VI\_g\_Bifidobacterium\_s\_Bifidobacterium\_animalis  
PWY\_5097\_\_L\_lysine\_biosynthesis\_VI\_g\_Bilophila\_s\_Bilophila\_wadsworthia  
PWY\_5097\_\_L\_lysine\_biosynthesis\_VI\_g\_Blautia\_s\_Ruminococcus\_gnavus  
PWY\_5097\_\_L\_lysine\_biosynthesis\_VI\_g\_Blautia\_s\_Ruminococcus\_obeum  
PWY\_5097\_\_L\_lysine\_biosynthesis\_VI\_g\_Burkholderiales\_noname\_s\_Burkholderiales\_bacterium  
PWY\_5097\_\_L\_lysine\_biosynthesis\_VI\_g\_Catenibacterium\_s\_Catenibacterium\_mitsuokai  
PWY\_5097\_\_L\_lysine\_biosynthesis\_VI\_g\_Citrobacter\_s\_Citrobacter\_freundii  
PWY\_5097\_\_L\_lysine\_biosynthesis\_VI\_g\_Clostridium\_s\_Clostridium\_asparagiforme  
PWY\_5097\_\_L\_lysine\_biosynthesis\_VI\_g\_Clostridium\_s\_Clostridium\_hathewayi  
PWY\_5097\_\_L\_lysine\_biosynthesis\_VI\_g\_Clostridium\_s\_Clostridium\_sp\_SS2\_1  
PWY\_5097\_\_L\_lysine\_biosynthesis\_VI\_g\_Coprobacter\_s\_Coprobacter\_fastidiosus  
PWY\_5097\_\_L\_lysine\_biosynthesis\_VI\_g\_Coprococcus\_s\_Coprococcus\_catus  
PWY\_5097\_\_L\_lysine\_biosynthesis\_VI\_g\_Coprococcus\_s\_Coprococcus\_eutactus  
PWY\_5097\_\_L\_lysine\_biosynthesis\_VI\_g\_Coprococcus\_s\_Coprococcus\_sp\_ART55\_1  
PWY\_5097\_\_L\_lysine\_biosynthesis\_VI\_g\_Dialister\_s\_Dialister\_invisus  
PWY\_5097\_\_L\_lysine\_biosynthesis\_VI\_g\_Enterococcus\_s\_Enterococcus\_durans  
PWY\_5097\_\_L\_lysine\_biosynthesis\_VI\_g\_Enterorhabdus\_s\_Enterorhabdus\_caecimuris  
PWY\_5097\_\_L\_lysine\_biosynthesis\_VI\_g\_Erysipelotrichaceae\_noname\_s\_Clostridium\_spiroform  
PWY\_5097\_\_L\_lysine\_biosynthesis\_VI\_g\_Erysipelotrichaceae\_noname\_s\_Erysipelotrichaceae\_b  
PWY\_5097\_\_L\_lysine\_biosynthesis\_VI\_g\_Eubacterium\_s\_Eubacterium\_siraeum  
PWY\_5097\_\_L\_lysine\_biosynthesis\_VI\_g\_Gordonibacter\_s\_Gordonibacter\_pamelaeae  
PWY\_5097\_\_L\_lysine\_biosynthesis\_VI\_g\_Lachnospiraceae\_noname\_s\_Lachnospiraceae\_bacterium



PWY\_5097\_\_L\_lysine\_biosynthesis\_VI\_g\_Lachnospiraceae\_noname\_s\_Lachnospiraceae\_bacteri  
PWY\_5097\_\_L\_lysine\_biosynthesis\_VI\_g\_Lachnospiraceae\_noname\_s\_Lachnospiraceae\_bacteri  
PWY\_5097\_\_L\_lysine\_biosynthesis\_VI\_g\_Lactobacillus\_s\_Lactobacillus\_casei\_paracasei  
PWY\_5097\_\_L\_lysine\_biosynthesis\_VI\_g\_Lactobacillus\_s\_Lactobacillus\_fermentum  
PWY\_5097\_\_L\_lysine\_biosynthesis\_VI\_g\_Odoribacter\_s\_Odoribacter\_laneus  
PWY\_5097\_\_L\_lysine\_biosynthesis\_VI\_g\_Odoribacter\_s\_Odoribacter\_splanchnicus  
PWY\_5097\_\_L\_lysine\_biosynthesis\_VI\_g\_Oxalobacter\_s\_Oxalobacter\_formigenes  
PWY\_5097\_\_L\_lysine\_biosynthesis\_VI\_g\_Parabacteroides\_s\_Parabacteroides\_distasonis  
PWY\_5097\_\_L\_lysine\_biosynthesis\_VI\_g\_Parabacteroides\_s\_Parabacteroides\_goldsteinii  
PWY\_5097\_\_L\_lysine\_biosynthesis\_VI\_g\_Parabacteroides\_s\_Parabacteroides\_johnsonii  
PWY\_5097\_\_L\_lysine\_biosynthesis\_VI\_g\_Parabacteroides\_s\_Parabacteroides\_merdae  
PWY\_5097\_\_L\_lysine\_biosynthesis\_VI\_g\_Parabacteroides\_s\_Parabacteroides\_sp\_20\_3  
PWY\_5097\_\_L\_lysine\_biosynthesis\_VI\_g\_Parabacteroides\_s\_Parabacteroides\_sp\_D13  
PWY\_5097\_\_L\_lysine\_biosynthesis\_VI\_g\_Paraprevotella\_s\_Paraprevotella\_clara  
PWY\_5097\_\_L\_lysine\_biosynthesis\_VI\_g\_Paraprevotella\_s\_Paraprevotella\_xylaniphila  
PWY\_5097\_\_L\_lysine\_biosynthesis\_VI\_g\_Peptostreptococcaceae\_noname\_s\_Clostridium\_bartle  
PWY\_5097\_\_L\_lysine\_biosynthesis\_VI\_g\_Phascolarctobacterium\_s\_Phascolarctobacterium\_succ  
PWY\_5097\_\_L\_lysine\_biosynthesis\_VI\_g\_Prevotella\_s\_Prevotella\_copri  
PWY\_5097\_\_L\_lysine\_biosynthesis\_VI\_g\_Roseburia\_s\_Roseburia\_hominis  
PWY\_5097\_\_L\_lysine\_biosynthesis\_VI\_g\_Ruminococcus\_s\_Ruminococcus\_callidus  
PWY\_5097\_\_L\_lysine\_biosynthesis\_VI\_g\_Ruminococcus\_s\_Ruminococcus\_champanellensis  
PWY\_5097\_\_L\_lysine\_biosynthesis\_VI\_g\_Ruminococcus\_s\_Ruminococcus\_lactaris  
PWY\_5097\_\_L\_lysine\_biosynthesis\_VI\_g\_Veillonella\_s\_Veillonella\_dispar  
PWY\_5097\_\_L\_lysine\_biosynthesis\_VI\_g\_Veillonella\_s\_Veillonella\_parvula  
PWY\_5100\_\_pyruvate\_fermentation\_to\_acetate\_and\_lactate\_II\_g\_Anaerostipes\_s\_Anaerostipe  
PWY\_5100\_\_pyruvate\_fermentation\_to\_acetate\_and\_lactate\_II\_g\_Bifidobacterium\_s\_Bifidobac  
PWY\_5100\_\_pyruvate\_fermentation\_to\_acetate\_and\_lactate\_II\_g\_Clostridium\_s\_Clostridium\_s  
PWY\_5100\_\_pyruvate\_fermentation\_to\_acetate\_and\_lactate\_II\_g\_Clostridium\_s\_Clostridium\_s  
PWY\_5100\_\_pyruvate\_fermentation\_to\_acetate\_and\_lactate\_II\_g\_Collinsella\_s\_Collinsella\_inte  
PWY\_5100\_\_pyruvate\_fermentation\_to\_acetate\_and\_lactate\_II\_g\_Collinsella\_s\_Collinsella\_tan  
PWY\_5100\_\_pyruvate\_fermentation\_to\_acetate\_and\_lactate\_II\_g\_Coprococcus\_s\_Coprococcus  
PWY\_5100\_\_pyruvate\_fermentation\_to\_acetate\_and\_lactate\_II\_g\_Coprococcus\_s\_Coprococcus  
PWY\_5100\_\_pyruvate\_fermentation\_to\_acetate\_and\_lactate\_II\_g\_Eggerthella\_s\_Eggerthella\_le  
PWY\_5100\_\_pyruvate\_fermentation\_to\_acetate\_and\_lactate\_II\_g\_Eggerthella\_s\_Eggerthella\_s  
PWY\_5100\_\_pyruvate\_fermentation\_to\_acetate\_and\_lactate\_II\_g\_Eggerthella\_s\_Eggerthella\_s  
PWY\_5100\_\_pyruvate\_fermentation\_to\_acetate\_and\_lactate\_II\_g\_Enterococcus\_s\_Enterococcu  
PWY\_5100\_\_pyruvate\_fermentation\_to\_acetate\_and\_lactate\_II\_g\_Enterococcus\_s\_Enterococcu  
PWY\_5100\_\_pyruvate\_fermentation\_to\_acetate\_and\_lactate\_II\_g\_Erysipelotrichaceae\_noname\_  
PWY\_5100\_\_pyruvate\_fermentation\_to\_acetate\_and\_lactate\_II\_g\_Erysipelotrichaceae\_noname\_  
PWY\_5100\_\_pyruvate\_fermentation\_to\_acetate\_and\_lactate\_II\_g\_Eubacterium\_s\_Eubacterium  
PWY\_5100\_\_pyruvate\_fermentation\_to\_acetate\_and\_lactate\_II\_g\_Gemella\_s\_Gemella\_sanguir  
PWY\_5100\_\_pyruvate\_fermentation\_to\_acetate\_and\_lactate\_II\_g\_Klebsiella\_s\_Klebsiella\_pneu  
PWY\_5100\_\_pyruvate\_fermentation\_to\_acetate\_and\_lactate\_II\_g\_Lachnospiraceae\_noname\_s\_  
PWY\_5100\_\_pyruvate\_fermentation\_to\_acetate\_and\_lactate\_II\_g\_Propionibacterium\_s\_Propio  
PWY\_5100\_\_pyruvate\_fermentation\_to\_acetate\_and\_lactate\_II\_g\_Roseburia\_s\_Roseburia\_hor  
PWY\_5100\_\_pyruvate\_fermentation\_to\_acetate\_and\_lactate\_II\_g\_Solobacterium\_s\_Solobacter  
PWY\_5100\_\_pyruvate\_fermentation\_to\_acetate\_and\_lactate\_II\_g\_Streptococcus\_s\_Streptococc

PWY\_5100\_\_pyruvate\_fermentation\_to\_acetate\_and\_lactate\_II\_g\_\_Streptococcus\_s\_\_Streptococ  
 PWY\_5100\_\_pyruvate\_fermentation\_to\_acetate\_and\_lactate\_II\_g\_\_Streptococcus\_s\_\_Streptococ  
 PWY\_5100\_\_pyruvate\_fermentation\_to\_acetate\_and\_lactate\_II\_g\_\_Veillonella\_s\_\_Veillonella\_dis  
 PWY\_5103\_\_L\_ileucine\_biosynthesis\_III\_g\_\_Akkermansia\_s\_\_Akkermansia\_muciniphila  
 PWY\_5103\_\_L\_ileucine\_biosynthesis\_III\_g\_\_Anaerofustis\_s\_\_Anaerofustis\_stercorihominis  
 PWY\_5103\_\_L\_ileucine\_biosynthesis\_III\_g\_\_Blautia\_s\_\_Blautia\_sp\_KLE\_1732  
 PWY\_5103\_\_L\_ileucine\_biosynthesis\_III\_g\_\_Blautia\_s\_\_Ruminococcus\_obeum  
 PWY\_5103\_\_L\_ileucine\_biosynthesis\_III\_g\_\_Citrobacter\_s\_\_Citrobacter\_freundii  
 PWY\_5103\_\_L\_ileucine\_biosynthesis\_III\_g\_\_Clostridium\_s\_\_Clostridium\_asparagiforme  
 PWY\_5103\_\_L\_ileucine\_biosynthesis\_III\_g\_\_Clostridium\_s\_\_Clostridium\_leptum  
 PWY\_5103\_\_L\_ileucine\_biosynthesis\_III\_g\_\_Coproccoccus\_s\_\_Coproccoccus\_catus  
 PWY\_5103\_\_L\_ileucine\_biosynthesis\_III\_g\_\_Coproccoccus\_s\_\_Coproccoccus\_eutactus  
 PWY\_5103\_\_L\_ileucine\_biosynthesis\_III\_g\_\_Coproccoccus\_s\_\_Coproccoccus\_sp\_ART55\_1  
 PWY\_5103\_\_L\_ileucine\_biosynthesis\_III\_g\_\_Eubacterium\_s\_\_Eubacterium\_siraeum  
 PWY\_5103\_\_L\_ileucine\_biosynthesis\_III\_g\_\_Fusobacterium\_s\_\_Fusobacterium\_nucleatum  
 PWY\_5103\_\_L\_ileucine\_biosynthesis\_III\_g\_\_Odoribacter\_s\_\_Odoribacter\_laneus  
 PWY\_5103\_\_L\_ileucine\_biosynthesis\_III\_g\_\_Odoribacter\_s\_\_Odoribacter\_splanchnicus  
 PWY\_5103\_\_L\_ileucine\_biosynthesis\_III\_g\_\_Propionibacterium\_s\_\_Propionibacterium\_freudenr  
 PWY\_5103\_\_L\_ileucine\_biosynthesis\_III\_g\_\_Ruminococcus\_s\_\_Ruminococcus\_sp  
 PWY\_5103\_\_L\_ileucine\_biosynthesis\_III\_g\_\_Streptococcus\_s\_\_Streptococcus\_australis  
 PWY\_5103\_\_L\_ileucine\_biosynthesis\_III\_g\_\_Streptococcus\_s\_\_Streptococcus\_mitis\_oralis\_pneu  
 PWY\_5103\_\_L\_ileucine\_biosynthesis\_III\_g\_\_Streptococcus\_s\_\_Streptococcus\_sanguinis  
 PWY\_5103\_\_L\_ileucine\_biosynthesis\_III\_g\_\_Subdoligranulum\_s\_\_Subdoligranulum\_sp\_4\_3\_54A  
 PWY\_5104\_\_L\_ileucine\_biosynthesis\_IV\_g\_\_Anaerostipes\_s\_\_Anaerostipes\_hadrus  
 PWY\_5104\_\_L\_ileucine\_biosynthesis\_IV\_g\_\_Clostridium\_s\_\_Clostridium\_sp\_SS2\_1  
 PWY\_5104\_\_L\_ileucine\_biosynthesis\_IV\_g\_\_Coproccoccus\_s\_\_Coproccoccus\_eutactus  
 PWY\_5104\_\_L\_ileucine\_biosynthesis\_IV\_g\_\_Coproccoccus\_s\_\_Coproccoccus\_sp\_ART55\_1  
 PWY\_5104\_\_L\_ileucine\_biosynthesis\_IV\_g\_\_Lachnospiraceae\_noname\_s\_\_Lachnospiraceae\_bac  
 PWY\_5104\_\_L\_ileucine\_biosynthesis\_IV\_g\_\_Propionibacterium\_s\_\_Propionibacterium\_freudenr  
 PWY\_5136\_\_fatty\_acid\_&beta\_oxidation\_II\_(peroxisome)\_g\_\_Citrobacter\_s\_\_Citrobacter\_freunc  
 PWY\_5138\_\_unsaturated\_even\_numbered\_fatty\_acid\_&beta\_oxidation\_g\_\_Citrobacter\_s\_\_Citro  
 PWY\_5138\_\_unsaturated\_even\_numbered\_fatty\_acid\_&beta\_oxidation\_unclassified  
 PWY\_5154\_\_L\_arginine\_biosynthesis\_III\_(via\_N\_acetyl\_L\_citrulline)\_g\_\_Coproccoccus\_s\_\_Coproco  
 PWY\_5154\_\_L\_arginine\_biosynthesis\_III\_(via\_N\_acetyl\_L\_citrulline)\_g\_\_Lactococcus\_s\_\_Lactococ  
 PWY\_5173\_\_superpathway\_of\_acetyl\_CoA\_biosynthesis\_g\_\_Citrobacter\_s\_\_Citrobacter\_freundii  
 PWY\_5173\_\_superpathway\_of\_acetyl\_CoA\_biosynthesis\_g\_\_Enterobacter\_s\_\_Enterobacter\_cloac  
 PWY\_5173\_\_superpathway\_of\_acetyl\_CoA\_biosynthesis\_g\_\_Klebsiella\_s\_\_Klebsiella\_pneumoniae  
 PWY\_5173\_\_superpathway\_of\_acetyl\_CoA\_biosynthesis\_g\_\_Nakaseomyces\_s\_\_Candida\_glabrata  
 PWY\_5173\_\_superpathway\_of\_acetyl\_CoA\_biosynthesis\_g\_\_Streptococcus\_s\_\_Streptococcus\_san  
 PWY\_5173\_\_superpathway\_of\_acetyl\_CoA\_biosynthesis\_unclassified  
 PWY\_5177\_\_glutaryl\_CoA\_degradation\_g\_\_Coproccoccus\_s\_\_Coproccoccus\_catus  
 PWY\_5180\_\_toluene\_degradation\_I\_(aerobic)\_(via\_o\_cresol)  
 PWY\_5182\_\_toluene\_degradation\_II\_(aerobic)\_(via\_4\_methylcatechol)  
 PWY\_5188\_\_tetrapyrrole\_biosynthesis\_I\_(from\_glutamate)\_g\_\_Actinomyces\_s\_\_Actinomyces\_gra  
 PWY\_5188\_\_tetrapyrrole\_biosynthesis\_I\_(from\_glutamate)\_g\_\_Akkermansia\_s\_\_Akkermansia\_mi  
 PWY\_5188\_\_tetrapyrrole\_biosynthesis\_I\_(from\_glutamate)\_g\_\_Anaerostipes\_s\_\_Anaerostipes\_ha  
 PWY\_5188\_\_tetrapyrrole\_biosynthesis\_I\_(from\_glutamate)\_g\_\_Anaerotruncus\_s\_\_Anaerotruncus

PWY\_5188\_\_tetrapyrrole\_biosynthesis\_I\_(from\_glutamate)\_g\_\_Bilophila\_s\_\_Bilophila\_wadsworth  
PWY\_5188\_\_tetrapyrrole\_biosynthesis\_I\_(from\_glutamate)\_g\_\_Blautia\_s\_\_Blautia\_sp\_KLE\_1732  
PWY\_5188\_\_tetrapyrrole\_biosynthesis\_I\_(from\_glutamate)\_g\_\_Blautia\_s\_\_Ruminococcus\_obeum  
PWY\_5188\_\_tetrapyrrole\_biosynthesis\_I\_(from\_glutamate)\_g\_\_Burkholderiales\_noname\_s\_\_Burk  
PWY\_5188\_\_tetrapyrrole\_biosynthesis\_I\_(from\_glutamate)\_g\_\_Citrobacter\_s\_\_Citrobacter\_freund  
PWY\_5188\_\_tetrapyrrole\_biosynthesis\_I\_(from\_glutamate)\_g\_\_Clostridium\_s\_\_Clostridium\_aspar  
PWY\_5188\_\_tetrapyrrole\_biosynthesis\_I\_(from\_glutamate)\_g\_\_Clostridium\_s\_\_Clostridium\_perfri  
PWY\_5188\_\_tetrapyrrole\_biosynthesis\_I\_(from\_glutamate)\_g\_\_Clostridium\_s\_\_Clostridium\_sp\_SS  
PWY\_5188\_\_tetrapyrrole\_biosynthesis\_I\_(from\_glutamate)\_g\_\_Coproccoccus\_s\_\_Coproccoccus\_cat  
PWY\_5188\_\_tetrapyrrole\_biosynthesis\_I\_(from\_glutamate)\_g\_\_Coproccoccus\_s\_\_Coproccoccus\_eut  
PWY\_5188\_\_tetrapyrrole\_biosynthesis\_I\_(from\_glutamate)\_g\_\_Dialister\_s\_\_Dialister\_invisus  
PWY\_5188\_\_tetrapyrrole\_biosynthesis\_I\_(from\_glutamate)\_g\_\_Eggerthella\_s\_\_Eggerthella\_lenta  
PWY\_5188\_\_tetrapyrrole\_biosynthesis\_I\_(from\_glutamate)\_g\_\_Enterobacter\_s\_\_Enterobacter\_cl  
PWY\_5188\_\_tetrapyrrole\_biosynthesis\_I\_(from\_glutamate)\_g\_\_Eubacterium\_s\_\_Eubacterium\_sp\_  
PWY\_5188\_\_tetrapyrrole\_biosynthesis\_I\_(from\_glutamate)\_g\_\_Fusobacterium\_s\_\_Fusobacterium  
PWY\_5188\_\_tetrapyrrole\_biosynthesis\_I\_(from\_glutamate)\_g\_\_Klebsiella\_s\_\_Klebsiella\_pneumon  
PWY\_5188\_\_tetrapyrrole\_biosynthesis\_I\_(from\_glutamate)\_g\_\_Lachnospiraceae\_noname\_s\_\_Lac  
PWY\_5188\_\_tetrapyrrole\_biosynthesis\_I\_(from\_glutamate)\_g\_\_Lachnospiraceae\_noname\_s\_\_Lac  
PWY\_5188\_\_tetrapyrrole\_biosynthesis\_I\_(from\_glutamate)\_g\_\_Lachnospiraceae\_noname\_s\_\_Lac  
PWY\_5188\_\_tetrapyrrole\_biosynthesis\_I\_(from\_glutamate)\_g\_\_Parasutterella\_s\_\_Parasutterella\_  
PWY\_5188\_\_tetrapyrrole\_biosynthesis\_I\_(from\_glutamate)\_g\_\_Peptostreptococcaceae\_noname\_  
PWY\_5188\_\_tetrapyrrole\_biosynthesis\_I\_(from\_glutamate)\_g\_\_Propionibacterium\_s\_\_Propioniba  
PWY\_5188\_\_tetrapyrrole\_biosynthesis\_I\_(from\_glutamate)\_g\_\_Ruminococcus\_s\_\_Ruminococcus\_  
PWY\_5188\_\_tetrapyrrole\_biosynthesis\_I\_(from\_glutamate)\_g\_\_Ruminococcus\_s\_\_Ruminococcus\_  
PWY\_5188\_\_tetrapyrrole\_biosynthesis\_I\_(from\_glutamate)\_g\_\_Ruminococcus\_s\_\_Ruminococcus\_  
PWY\_5188\_\_tetrapyrrole\_biosynthesis\_I\_(from\_glutamate)\_g\_\_Veillonella\_s\_\_Veillonella\_dispar  
PWY\_5188\_\_tetrapyrrole\_biosynthesis\_I\_(from\_glutamate)\_g\_\_Veillonella\_s\_\_Veillonella\_parvula  
PWY\_5189\_\_tetrapyrrole\_biosynthesis\_II\_(from\_glycine)\_g\_\_Blautia\_s\_\_Blautia\_sp\_KLE\_1732  
PWY\_5189\_\_tetrapyrrole\_biosynthesis\_II\_(from\_glycine)\_g\_\_Blautia\_s\_\_Ruminococcus\_obeum  
PWY\_5189\_\_tetrapyrrole\_biosynthesis\_II\_(from\_glycine)\_g\_\_Citrobacter\_s\_\_Citrobacter\_freundii  
PWY\_5189\_\_tetrapyrrole\_biosynthesis\_II\_(from\_glycine)\_g\_\_Clostridium\_s\_\_Clostridium\_asparag  
PWY\_5189\_\_tetrapyrrole\_biosynthesis\_II\_(from\_glycine)\_g\_\_Enterobacter\_s\_\_Enterobacter\_cloac  
PWY\_5189\_\_tetrapyrrole\_biosynthesis\_II\_(from\_glycine)\_g\_\_Nakaseomyces\_s\_\_Candida\_glabrata  
PWY\_5189\_\_tetrapyrrole\_biosynthesis\_II\_(from\_glycine)\_g\_\_Propionibacterium\_s\_\_Propionibacte  
PWY\_5189\_\_tetrapyrrole\_biosynthesis\_II\_(from\_glycine)\_g\_\_Ruminococcus\_s\_\_Ruminococcus\_sp  
PWY\_5189\_\_tetrapyrrole\_biosynthesis\_II\_(from\_glycine)\_g\_\_Streptococcus\_s\_\_Streptococcus\_sar  
PWY\_5304\_\_superpathway\_of\_sulfur\_oxidation\_(Acidianus\_ambivalens)\_g\_\_Anaerostipes\_s\_\_Ani  
PWY\_5304\_\_superpathway\_of\_sulfur\_oxidation\_(Acidianus\_ambivalens)\_g\_\_Clostridium\_s\_\_Clos  
PWY\_5304\_\_superpathway\_of\_sulfur\_oxidation\_(Acidianus\_ambivalens)\_g\_\_Coproccoccus\_s\_\_Cof  
PWY\_5304\_\_superpathway\_of\_sulfur\_oxidation\_(Acidianus\_ambivalens)\_g\_\_Coproccoccus\_s\_\_Cof  
PWY\_5304\_\_superpathway\_of\_sulfur\_oxidation\_(Acidianus\_ambivalens)\_g\_\_Lachnospiraceae\_nor  
PWY\_5347\_\_superpathway\_of\_L\_methionine\_biosynthesis\_(transsulfuration)\_g\_\_Anaerostipes\_s\_  
PWY\_5347\_\_superpathway\_of\_L\_methionine\_biosynthesis\_(transsulfuration)\_g\_\_Clostridium\_s\_  
PWY\_5347\_\_superpathway\_of\_L\_methionine\_biosynthesis\_(transsulfuration)\_g\_\_Enterobacter\_s\_  
PWY\_5347\_\_superpathway\_of\_L\_methionine\_biosynthesis\_(transsulfuration)\_g\_\_Klebsiella\_s\_\_Kl  
PWY\_5347\_\_superpathway\_of\_L\_methionine\_biosynthesis\_(transsulfuration)\_g\_\_Lachnospiraceae  
PWY\_5347\_\_superpathway\_of\_L\_methionine\_biosynthesis\_(transsulfuration)\_g\_\_Lactococcus\_s\_\_

PWY\_5367\_\_petroselinate\_biosynthesis\_g\_Lactococcus\_s\_Lactococcus\_lactis  
 PWY\_5415\_\_catechol\_degradation\_I\_(meta\_cleavage\_pathway)  
 PWY\_5415\_\_catechol\_degradation\_I\_(meta\_cleavage\_pathway)\_g\_Klebsiella\_s\_Klebsiella\_pne  
 PWY\_5484\_\_glycolysis\_II\_(from\_fructose\_6\_phosphate)\_g\_Citrobacter\_s\_Citrobacter\_freundii  
 PWY\_5484\_\_glycolysis\_II\_(from\_fructose\_6\_phosphate)\_g\_Enterobacter\_s\_Enterobacter\_cloaca  
 PWY\_5484\_\_glycolysis\_II\_(from\_fructose\_6\_phosphate)\_g\_Klebsiella\_s\_Klebsiella\_pneumoniae  
 PWY\_5484\_\_glycolysis\_II\_(from\_fructose\_6\_phosphate)\_g\_Lactococcus\_s\_Lactococcus\_lactis  
 PWY\_561\_\_superpathway\_of\_glyoxylate\_cycle\_and\_fatty\_acid\_degradation\_g\_Citrobacter\_s\_C  
 PWY\_5656\_\_mannosylglycerate\_biosynthesis\_I\_unclassified  
 PWY\_5659\_\_GDP\_mannose\_biosynthesis\_g\_Alistipes\_s\_Alistipes\_finegoldii  
 PWY\_5659\_\_GDP\_mannose\_biosynthesis\_g\_Alistipes\_s\_Alistipes\_onderdonkii  
 PWY\_5659\_\_GDP\_mannose\_biosynthesis\_g\_Alistipes\_s\_Alistipes\_shahii  
 PWY\_5659\_\_GDP\_mannose\_biosynthesis\_g\_Alistipes\_s\_Alistipes\_sp\_HGB5  
 PWY\_5659\_\_GDP\_mannose\_biosynthesis\_g\_Anaerostipes\_s\_Anaerostipes\_hadrus  
 PWY\_5659\_\_GDP\_mannose\_biosynthesis\_g\_Bacteroides\_s\_Bacteroides\_finegoldii  
 PWY\_5659\_\_GDP\_mannose\_biosynthesis\_g\_Bacteroides\_s\_Bacteroides\_ovatus  
 PWY\_5659\_\_GDP\_mannose\_biosynthesis\_g\_Bacteroides\_s\_Bacteroides\_sp\_1\_1\_30  
 PWY\_5659\_\_GDP\_mannose\_biosynthesis\_g\_Bacteroides\_s\_Bacteroides\_sp\_2\_1\_22  
 PWY\_5659\_\_GDP\_mannose\_biosynthesis\_g\_Bacteroides\_s\_Bacteroides\_sp\_2\_2\_4  
 PWY\_5659\_\_GDP\_mannose\_biosynthesis\_g\_Bacteroides\_s\_Bacteroides\_sp\_3\_1\_23  
 PWY\_5659\_\_GDP\_mannose\_biosynthesis\_g\_Bacteroides\_s\_Bacteroides\_xylanisolvens  
 PWY\_5659\_\_GDP\_mannose\_biosynthesis\_g\_Clostridium\_s\_Clostridium\_sp\_SS2\_1  
 PWY\_5659\_\_GDP\_mannose\_biosynthesis\_g\_Coprococcus\_s\_Coprococcus\_eutactus  
 PWY\_5659\_\_GDP\_mannose\_biosynthesis\_g\_Coprococcus\_s\_Coprococcus\_sp\_ART55\_1  
 PWY\_5659\_\_GDP\_mannose\_biosynthesis\_g\_Eubacterium\_s\_Eubacterium\_siraeum  
 PWY\_5659\_\_GDP\_mannose\_biosynthesis\_g\_Lachnospiraceae\_noname\_s\_Lachnospiraceae\_bact  
 PWY\_5659\_\_GDP\_mannose\_biosynthesis\_g\_Nakaseomyces\_s\_Candida\_glabrata  
 PWY\_5659\_\_GDP\_mannose\_biosynthesis\_g\_Odoribacter\_s\_Odoribacter\_splanchnicus  
 PWY\_5659\_\_GDP\_mannose\_biosynthesis\_g\_Propionibacterium\_s\_Propionibacterium\_freudenre  
 PWY\_5659\_\_GDP\_mannose\_biosynthesis\_g\_Ruminococcus\_s\_Ruminococcus\_sp  
 PWY\_5667\_\_CDP\_diacylglycerol\_biosynthesis\_I\_g\_Alistipes\_s\_Alistipes\_finegoldii  
 PWY\_5667\_\_CDP\_diacylglycerol\_biosynthesis\_I\_g\_Alistipes\_s\_Alistipes\_indistinctus  
 PWY\_5667\_\_CDP\_diacylglycerol\_biosynthesis\_I\_g\_Alistipes\_s\_Alistipes\_sp\_HGB5  
 PWY\_5667\_\_CDP\_diacylglycerol\_biosynthesis\_I\_g\_Anaerostipes\_s\_Anaerostipes\_hadrus  
 PWY\_5667\_\_CDP\_diacylglycerol\_biosynthesis\_I\_g\_Bacteroides\_s\_Bacteroides\_cellulosilyticus  
 PWY\_5667\_\_CDP\_diacylglycerol\_biosynthesis\_I\_g\_Bacteroides\_s\_Bacteroides\_clarus  
 PWY\_5667\_\_CDP\_diacylglycerol\_biosynthesis\_I\_g\_Bacteroides\_s\_Bacteroides\_coprocola  
 PWY\_5667\_\_CDP\_diacylglycerol\_biosynthesis\_I\_g\_Bacteroides\_s\_Bacteroides\_eggerthii  
 PWY\_5667\_\_CDP\_diacylglycerol\_biosynthesis\_I\_g\_Bacteroides\_s\_Bacteroides\_faecis  
 PWY\_5667\_\_CDP\_diacylglycerol\_biosynthesis\_I\_g\_Bacteroides\_s\_Bacteroides\_finegoldii  
 PWY\_5667\_\_CDP\_diacylglycerol\_biosynthesis\_I\_g\_Bacteroides\_s\_Bacteroides\_intestinalis  
 PWY\_5667\_\_CDP\_diacylglycerol\_biosynthesis\_I\_g\_Bacteroides\_s\_Bacteroides\_ovatus  
 PWY\_5667\_\_CDP\_diacylglycerol\_biosynthesis\_I\_g\_Bacteroides\_s\_Bacteroides\_plebeius  
 PWY\_5667\_\_CDP\_diacylglycerol\_biosynthesis\_I\_g\_Bacteroides\_s\_Bacteroides\_salyersiae  
 PWY\_5667\_\_CDP\_diacylglycerol\_biosynthesis\_I\_g\_Bacteroides\_s\_Bacteroides\_sp\_1\_1\_30  
 PWY\_5667\_\_CDP\_diacylglycerol\_biosynthesis\_I\_g\_Bacteroides\_s\_Bacteroides\_sp\_1\_1\_6  
 PWY\_5667\_\_CDP\_diacylglycerol\_biosynthesis\_I\_g\_Bacteroides\_s\_Bacteroides\_sp\_2\_1\_22

PWY\_5667\_\_CDP\_diacylglycerol\_biosynthesis\_l\_g\_Bacteroides\_s\_Bacteroides\_sp\_2\_2\_4

PWY\_5667\_\_CDP\_diacylglycerol\_biosynthesis\_l\_g\_Bacteroides\_s\_Bacteroides\_sp\_3\_1\_19

PWY\_5667\_\_CDP\_diacylglycerol\_biosynthesis\_l\_g\_Bacteroides\_s\_Bacteroides\_sp\_3\_1\_23

PWY\_5667\_\_CDP\_diacylglycerol\_biosynthesis\_l\_g\_Bacteroides\_s\_Bacteroides\_sp\_D20

PWY\_5667\_\_CDP\_diacylglycerol\_biosynthesis\_l\_g\_Bacteroides\_s\_Bacteroides\_stercoris

PWY\_5667\_\_CDP\_diacylglycerol\_biosynthesis\_l\_g\_Bacteroides\_s\_Bacteroides\_thetaiotaomicron

PWY\_5667\_\_CDP\_diacylglycerol\_biosynthesis\_l\_g\_Bacteroides\_s\_Bacteroides\_uniformis

PWY\_5667\_\_CDP\_diacylglycerol\_biosynthesis\_l\_g\_Bacteroides\_s\_Bacteroides\_xylanisolvens

PWY\_5667\_\_CDP\_diacylglycerol\_biosynthesis\_l\_g\_Barnesiella\_s\_Barnesiella\_intestinihominis

PWY\_5667\_\_CDP\_diacylglycerol\_biosynthesis\_l\_g\_Blautia\_s\_Blautia\_hydrogenotrophica

PWY\_5667\_\_CDP\_diacylglycerol\_biosynthesis\_l\_g\_Blautia\_s\_Ruminococcus\_gnavus

PWY\_5667\_\_CDP\_diacylglycerol\_biosynthesis\_l\_g\_Blautia\_s\_Ruminococcus\_obeum

PWY\_5667\_\_CDP\_diacylglycerol\_biosynthesis\_l\_g\_Butyrivibrio\_s\_Butyrivibrio\_crossotus

PWY\_5667\_\_CDP\_diacylglycerol\_biosynthesis\_l\_g\_Citrobacter\_s\_Citrobacter\_freundii

PWY\_5667\_\_CDP\_diacylglycerol\_biosynthesis\_l\_g\_Clostridiales\_noname\_s\_Clostridiales\_bacter

PWY\_5667\_\_CDP\_diacylglycerol\_biosynthesis\_l\_g\_Clostridium\_s\_Clostridium\_asparagiforme

PWY\_5667\_\_CDP\_diacylglycerol\_biosynthesis\_l\_g\_Clostridium\_s\_Clostridium\_bolteae

PWY\_5667\_\_CDP\_diacylglycerol\_biosynthesis\_l\_g\_Clostridium\_s\_Clostridium\_clostridioforme

PWY\_5667\_\_CDP\_diacylglycerol\_biosynthesis\_l\_g\_Clostridium\_s\_Clostridium\_hathewayi

PWY\_5667\_\_CDP\_diacylglycerol\_biosynthesis\_l\_g\_Clostridium\_s\_Clostridium\_leptum

PWY\_5667\_\_CDP\_diacylglycerol\_biosynthesis\_l\_g\_Clostridium\_s\_Clostridium\_sp\_L2\_50

PWY\_5667\_\_CDP\_diacylglycerol\_biosynthesis\_l\_g\_Clostridium\_s\_Clostridium\_sp\_SS2\_1

PWY\_5667\_\_CDP\_diacylglycerol\_biosynthesis\_l\_g\_Copro bacter\_s\_Copro bacter\_fastidiosus

PWY\_5667\_\_CDP\_diacylglycerol\_biosynthesis\_l\_g\_Coprococcus\_s\_Coprococcus\_eutactus

PWY\_5667\_\_CDP\_diacylglycerol\_biosynthesis\_l\_g\_Dialister\_s\_Dialister\_invisus

PWY\_5667\_\_CDP\_diacylglycerol\_biosynthesis\_l\_g\_Dorea\_s\_Dorea\_formicigenans

PWY\_5667\_\_CDP\_diacylglycerol\_biosynthesis\_l\_g\_Dorea\_s\_Dorea\_longicatena

PWY\_5667\_\_CDP\_diacylglycerol\_biosynthesis\_l\_g\_Enterobacter\_s\_Enterobacter\_cloacae

PWY\_5667\_\_CDP\_diacylglycerol\_biosynthesis\_l\_g>Erysipelotrichaceae\_noname\_s\_Clostridium

PWY\_5667\_\_CDP\_diacylglycerol\_biosynthesis\_l\_g>Eubacterium\_s\_Eubacterium\_eligens

PWY\_5667\_\_CDP\_diacylglycerol\_biosynthesis\_l\_g>Eubacterium\_s\_Eubacterium\_hallii

PWY\_5667\_\_CDP\_diacylglycerol\_biosynthesis\_l\_g>Eubacterium\_s\_Eubacterium\_ramulus

PWY\_5667\_\_CDP\_diacylglycerol\_biosynthesis\_l\_g>Eubacterium\_s\_Eubacterium\_siraeum

PWY\_5667\_\_CDP\_diacylglycerol\_biosynthesis\_l\_g>Eubacterium\_s\_Eubacterium\_ventriosum

PWY\_5667\_\_CDP\_diacylglycerol\_biosynthesis\_l\_g>Gordonibacter\_s\_Gordonibacter\_pamelaeae

PWY\_5667\_\_CDP\_diacylglycerol\_biosynthesis\_l\_g>Klebsiella\_s\_Klebsiella\_pneumoniae

PWY\_5667\_\_CDP\_diacylglycerol\_biosynthesis\_l\_g>Lachnospiraceae\_noname\_s\_Lachnospiraceae

PWY\_5667\_\_CDP\_diacylglycerol\_biosynthesis\_l\_g>Lachnospiraceae\_noname\_s\_Lachnospiraceae

PWY\_5667\_\_CDP\_diacylglycerol\_biosynthesis\_l\_g>Lachnospiraceae\_noname\_s\_Lachnospiraceae

PWY\_5667\_\_CDP\_diacylglycerol\_biosynthesis\_l\_g>Lachnospiraceae\_noname\_s\_Lachnospiraceae

PWY\_5667\_\_CDP\_diacylglycerol\_biosynthesis\_l\_g>Lachnospiraceae\_noname\_s\_Lachnospiraceae

PWY\_5667\_\_CDP\_diacylglycerol\_biosynthesis\_l\_g>Lachnospiraceae\_noname\_s\_Lachnospiraceae

PWY\_5667\_\_CDP\_diacylglycerol\_biosynthesis\_l\_g>Lachnospiraceae\_noname\_s\_Lachnospiraceae

PWY\_5667\_\_CDP\_diacylglycerol\_biosynthesis\_l\_g>Lachnospiraceae\_noname\_s\_Lachnospiraceae

PWY\_5667\_\_CDP\_diacylglycerol\_biosynthesis\_l\_g>Oxalobacter\_s\_Oxalobacter\_formigenes

PWY\_5667\_\_CDP\_diacylglycerol\_biosynthesis\_l\_g>Parabacteroides\_s>Parabacteroides\_distason

PWY\_5667\_\_CDP\_diacylglycerol\_biosynthesis\_l\_g>Parabacteroides\_s>Parabacteroides\_johnson

PWY\_5667\_\_CDP\_diacylglycerol\_biosynthesis\_l\_g\_\_Parabacteroides\_s\_\_Parabacteroides\_merdae  
PWY\_5667\_\_CDP\_diacylglycerol\_biosynthesis\_l\_g\_\_Parabacteroides\_s\_\_Parabacteroides\_sp\_D13  
PWY\_5667\_\_CDP\_diacylglycerol\_biosynthesis\_l\_g\_\_Paraprevotella\_s\_\_Paraprevotella\_clara  
PWY\_5667\_\_CDP\_diacylglycerol\_biosynthesis\_l\_g\_\_Peptostreptococcaceae\_noname\_s\_\_Clostridiu  
PWY\_5667\_\_CDP\_diacylglycerol\_biosynthesis\_l\_g\_\_Propionibacterium\_s\_\_Propionibacterium\_frei  
PWY\_5667\_\_CDP\_diacylglycerol\_biosynthesis\_l\_g\_\_Roseburia\_s\_\_Roseburia\_hominis  
PWY\_5667\_\_CDP\_diacylglycerol\_biosynthesis\_l\_g\_\_Roseburia\_s\_\_Roseburia\_inulinivorans  
PWY\_5667\_\_CDP\_diacylglycerol\_biosynthesis\_l\_g\_\_Ruminococcus\_s\_\_Ruminococcus\_champanell  
PWY\_5667\_\_CDP\_diacylglycerol\_biosynthesis\_l\_g\_\_Ruminococcus\_s\_\_Ruminococcus\_sp  
PWY\_5667\_\_CDP\_diacylglycerol\_biosynthesis\_l\_g\_\_Streptococcus\_s\_\_Streptococcus\_mitis\_oralis  
PWY\_5667\_\_CDP\_diacylglycerol\_biosynthesis\_l\_g\_\_Subdoligranulum\_s\_\_Subdoligranulum\_sp\_4  
PWY\_5667\_\_CDP\_diacylglycerol\_biosynthesis\_l\_g\_\_Veillonella\_s\_\_Veillonella\_dispar  
PWY\_5667\_\_CDP\_diacylglycerol\_biosynthesis\_l\_g\_\_Veillonella\_s\_\_Veillonella\_parvula  
PWY\_5686\_\_UMP\_biosynthesis\_g\_\_Adlercreutzia\_s\_\_Adlercreutzia\_equolifaciens  
PWY\_5686\_\_UMP\_biosynthesis\_g\_\_Akkermansia\_s\_\_Akkermansia\_muciniphila  
PWY\_5686\_\_UMP\_biosynthesis\_g\_\_Alistipes\_s\_\_Alistipes\_finegoldii  
PWY\_5686\_\_UMP\_biosynthesis\_g\_\_Alistipes\_s\_\_Alistipes\_indistinctus  
PWY\_5686\_\_UMP\_biosynthesis\_g\_\_Alistipes\_s\_\_Alistipes\_onderdonkii  
PWY\_5686\_\_UMP\_biosynthesis\_g\_\_Alistipes\_s\_\_Alistipes\_putredinis  
PWY\_5686\_\_UMP\_biosynthesis\_g\_\_Alistipes\_s\_\_Alistipes\_sp\_HGB5  
PWY\_5686\_\_UMP\_biosynthesis\_g\_\_Anaerostipes\_s\_\_Anaerostipes\_hadrus  
PWY\_5686\_\_UMP\_biosynthesis\_g\_\_Bacteroides\_s\_\_Bacteroides\_cellulosilyticus  
PWY\_5686\_\_UMP\_biosynthesis\_g\_\_Bacteroides\_s\_\_Bacteroides\_clarus  
PWY\_5686\_\_UMP\_biosynthesis\_g\_\_Bacteroides\_s\_\_Bacteroides\_coprocola  
PWY\_5686\_\_UMP\_biosynthesis\_g\_\_Bacteroides\_s\_\_Bacteroides\_eggerthii  
PWY\_5686\_\_UMP\_biosynthesis\_g\_\_Bacteroides\_s\_\_Bacteroides\_faecis  
PWY\_5686\_\_UMP\_biosynthesis\_g\_\_Bacteroides\_s\_\_Bacteroides\_finegoldii  
PWY\_5686\_\_UMP\_biosynthesis\_g\_\_Bacteroides\_s\_\_Bacteroides\_intestinalis  
PWY\_5686\_\_UMP\_biosynthesis\_g\_\_Bacteroides\_s\_\_Bacteroides\_massiliensis  
PWY\_5686\_\_UMP\_biosynthesis\_g\_\_Bacteroides\_s\_\_Bacteroides\_ovatus  
PWY\_5686\_\_UMP\_biosynthesis\_g\_\_Bacteroides\_s\_\_Bacteroides\_plebeius  
PWY\_5686\_\_UMP\_biosynthesis\_g\_\_Bacteroides\_s\_\_Bacteroides\_sp\_1\_1\_6  
PWY\_5686\_\_UMP\_biosynthesis\_g\_\_Bacteroides\_s\_\_Bacteroides\_sp\_2\_2\_4  
PWY\_5686\_\_UMP\_biosynthesis\_g\_\_Bacteroides\_s\_\_Bacteroides\_sp\_3\_1\_19  
PWY\_5686\_\_UMP\_biosynthesis\_g\_\_Bacteroides\_s\_\_Bacteroides\_sp\_3\_1\_23  
PWY\_5686\_\_UMP\_biosynthesis\_g\_\_Bacteroides\_s\_\_Bacteroides\_sp\_D20  
PWY\_5686\_\_UMP\_biosynthesis\_g\_\_Bacteroides\_s\_\_Bacteroides\_stercoris  
PWY\_5686\_\_UMP\_biosynthesis\_g\_\_Bacteroides\_s\_\_Bacteroides\_thetaiotaomicron  
PWY\_5686\_\_UMP\_biosynthesis\_g\_\_Bacteroides\_s\_\_Bacteroides\_uniformis  
PWY\_5686\_\_UMP\_biosynthesis\_g\_\_Barnesiella\_s\_\_Barnesiella\_intestinihominis  
PWY\_5686\_\_UMP\_biosynthesis\_g\_\_Bifidobacterium\_s\_\_Bifidobacterium\_animalis  
PWY\_5686\_\_UMP\_biosynthesis\_g\_\_Bifidobacterium\_s\_\_Bifidobacterium\_catenulatum  
PWY\_5686\_\_UMP\_biosynthesis\_g\_\_Bifidobacterium\_s\_\_Bifidobacterium\_dentium  
PWY\_5686\_\_UMP\_biosynthesis\_g\_\_Bifidobacterium\_s\_\_Bifidobacterium\_pseudocatenulatum  
PWY\_5686\_\_UMP\_biosynthesis\_g\_\_Bilophila\_s\_\_Bilophila\_wadsworthia  
PWY\_5686\_\_UMP\_biosynthesis\_g\_\_Blautia\_s\_\_Blautia\_sp\_KLE\_1732  
PWY\_5686\_\_UMP\_biosynthesis\_g\_\_Blautia\_s\_\_Ruminococcus\_gnavus

|                                                                                          |
|------------------------------------------------------------------------------------------|
| PWY_5686__UMP_biosynthesis_g__Blautia_s__Ruminococcus_obeum                              |
| PWY_5686__UMP_biosynthesis_g__Butyrivibrio_s__Butyrivibrio_crossotus                     |
| PWY_5686__UMP_biosynthesis_g__Citrobacter_s__Citrobacter_freundii                        |
| PWY_5686__UMP_biosynthesis_g__Clostridiales_noname_s__Bacteroides_pectinophilus          |
| PWY_5686__UMP_biosynthesis_g__Clostridium_s__Clostridium_hathewayi                       |
| PWY_5686__UMP_biosynthesis_g__Clostridium_s__Clostridium_leptum                          |
| PWY_5686__UMP_biosynthesis_g__Clostridium_s__Clostridium_perfringens                     |
| PWY_5686__UMP_biosynthesis_g__Clostridium_s__Clostridium_sp_SS2_1                        |
| PWY_5686__UMP_biosynthesis_g__Clostridium_s__Clostridium_symbiosum                       |
| PWY_5686__UMP_biosynthesis_g__Collinsella_s__Collinsella_intestinalis                    |
| PWY_5686__UMP_biosynthesis_g__Collinsella_s__Collinsella_tanakaei                        |
| PWY_5686__UMP_biosynthesis_g__Coprococcus_s__Coprococcus_catus                           |
| PWY_5686__UMP_biosynthesis_g__Coprococcus_s__Coprococcus_eutactus                        |
| PWY_5686__UMP_biosynthesis_g__Dialister_s__Dialister_invisus                             |
| PWY_5686__UMP_biosynthesis_g__Eggerthella_s__Eggerthella_lenta                           |
| PWY_5686__UMP_biosynthesis_g__Eggerthella_s__Eggerthella_sp_1_3_56FAA                    |
| PWY_5686__UMP_biosynthesis_g__Eggerthella_s__Eggerthella_sp_HGA1                         |
| PWY_5686__UMP_biosynthesis_g__Enterobacter_s__Enterobacter_cloacae                       |
| PWY_5686__UMP_biosynthesis_g__Erysipelotrichaceae_noname_s__Clostridium_spiroforme       |
| PWY_5686__UMP_biosynthesis_g__Erysipelotrichaceae_noname_s__Erysipelotrichaceae_bacteriu |
| PWY_5686__UMP_biosynthesis_g__Erysipelotrichaceae_noname_s__Erysipelotrichaceae_bacteriu |
| PWY_5686__UMP_biosynthesis_g__Erysipelotrichaceae_noname_s__Eubacterium_biforme          |
| PWY_5686__UMP_biosynthesis_g__Erysipelotrichaceae_noname_s__Eubacterium_cylindroides     |
| PWY_5686__UMP_biosynthesis_g__Eubacterium_s__Eubacterium_ramulus                         |
| PWY_5686__UMP_biosynthesis_g__Eubacterium_s__Eubacterium_siraeum                         |
| PWY_5686__UMP_biosynthesis_g__Eubacterium_s__Eubacterium_sp_3_1_31                       |
| PWY_5686__UMP_biosynthesis_g__Eubacterium_s__Eubacterium_ventriosum                      |
| PWY_5686__UMP_biosynthesis_g__Fusobacterium_s__Fusobacterium_nucleatum                   |
| PWY_5686__UMP_biosynthesis_g__Gemella_s__Gemella_sanguinis                               |
| PWY_5686__UMP_biosynthesis_g__Holdemania_s__Holdemania_filiformis                        |
| PWY_5686__UMP_biosynthesis_g__Klebsiella_s__Klebsiella_pneumoniae                        |
| PWY_5686__UMP_biosynthesis_g__Lachnospiraceae_noname_s__Lachnospiraceae_bacterium_1      |
| PWY_5686__UMP_biosynthesis_g__Lachnospiraceae_noname_s__Lachnospiraceae_bacterium_2      |
| PWY_5686__UMP_biosynthesis_g__Lachnospiraceae_noname_s__Lachnospiraceae_bacterium_3      |
| PWY_5686__UMP_biosynthesis_g__Lachnospiraceae_noname_s__Lachnospiraceae_bacterium_5      |
| PWY_5686__UMP_biosynthesis_g__Lachnospiraceae_noname_s__Lachnospiraceae_bacterium_7      |
| PWY_5686__UMP_biosynthesis_g__Lactobacillus_s__Lactobacillus_fermentum                   |
| PWY_5686__UMP_biosynthesis_g__Lactococcus_s__Lactococcus_lactis                          |
| PWY_5686__UMP_biosynthesis_g__Methanobrevibacter_s__Methanobrevibacter_smithii           |
| PWY_5686__UMP_biosynthesis_g__Odoribacter_s__Odoribacter_laneus                          |
| PWY_5686__UMP_biosynthesis_g__Odoribacter_s__Odoribacter_splanchnicus                    |
| PWY_5686__UMP_biosynthesis_g__Oxalobacter_s__Oxalobacter_formigenes                      |
| PWY_5686__UMP_biosynthesis_g__Parabacteroides_s__Parabacteroides_distasonis              |
| PWY_5686__UMP_biosynthesis_g__Parabacteroides_s__Parabacteroides_goldsteinii             |
| PWY_5686__UMP_biosynthesis_g__Parabacteroides_s__Parabacteroides_johnsonii               |
| PWY_5686__UMP_biosynthesis_g__Parabacteroides_s__Parabacteroides_merdae                  |
| PWY_5686__UMP_biosynthesis_g__Parabacteroides_s__Parabacteroides_sp_20_3                 |

PWY\_5686\_\_UMP\_biosynthesis\_g\_\_Parabacteroides\_s\_\_Parabacteroides\_sp\_D13  
 PWY\_5686\_\_UMP\_biosynthesis\_g\_\_Pediococcus\_s\_\_Pediococcus\_acidilactici  
 PWY\_5686\_\_UMP\_biosynthesis\_g\_\_Pediococcus\_s\_\_Pediococcus\_lolii  
 PWY\_5686\_\_UMP\_biosynthesis\_g\_\_Peptostreptococcaceae\_noname\_s\_\_Clostridium\_bartlettii  
 PWY\_5686\_\_UMP\_biosynthesis\_g\_\_Phascolarctobacterium\_s\_\_Phascolarctobacterium\_succinatut  
 PWY\_5686\_\_UMP\_biosynthesis\_g\_\_Prevotella\_s\_\_Prevotella\_copri  
 PWY\_5686\_\_UMP\_biosynthesis\_g\_\_Propionibacterium\_s\_\_Propionibacterium\_freudenreichii  
 PWY\_5686\_\_UMP\_biosynthesis\_g\_\_Roseburia\_s\_\_Roseburia\_hominis  
 PWY\_5686\_\_UMP\_biosynthesis\_g\_\_Ruminococcaceae\_noname\_s\_\_Ruminococcaceae\_bacterium\_\_  
 PWY\_5686\_\_UMP\_biosynthesis\_g\_\_Ruminococcus\_s\_\_Ruminococcus\_champanellensis  
 PWY\_5686\_\_UMP\_biosynthesis\_g\_\_Ruminococcus\_s\_\_Ruminococcus\_sp  
 PWY\_5686\_\_UMP\_biosynthesis\_g\_\_Streptococcus\_s\_\_Streptococcus\_australis  
 PWY\_5686\_\_UMP\_biosynthesis\_g\_\_Streptococcus\_s\_\_Streptococcus\_mitis\_oralis\_pneumoniae  
 PWY\_5686\_\_UMP\_biosynthesis\_g\_\_Subdoligranulum\_s\_\_Subdoligranulum\_sp\_4\_3\_54A2FAA  
 PWY\_5686\_\_UMP\_biosynthesis\_g\_\_Veillonella\_s\_\_Veillonella\_dispar  
 PWY\_5686\_\_UMP\_biosynthesis\_g\_\_Veillonella\_s\_\_Veillonella\_parvula  
 PWY\_5690\_\_TCA\_cycle\_II\_(plants\_and\_fungi)\_g\_\_Citrobacter\_s\_\_Citrobacter\_freundii  
 PWY\_5695\_\_urate\_biosynthesis\_inosine\_5\_phosphate\_degradation\_g\_\_Alistipes\_s\_\_Alistipes\_in  
 PWY\_5695\_\_urate\_biosynthesis\_inosine\_5\_phosphate\_degradation\_g\_\_Alistipes\_s\_\_Alistipes\_sf  
 PWY\_5695\_\_urate\_biosynthesis\_inosine\_5\_phosphate\_degradation\_g\_\_Bacteroides\_s\_\_Bacteroi  
 PWY\_5695\_\_urate\_biosynthesis\_inosine\_5\_phosphate\_degradation\_g\_\_Barnesiella\_s\_\_Barnesie  
 PWY\_5695\_\_urate\_biosynthesis\_inosine\_5\_phosphate\_degradation\_g\_\_Blautia\_s\_\_Ruminococcu  
 PWY\_5695\_\_urate\_biosynthesis\_inosine\_5\_phosphate\_degradation\_g\_\_Citrobacter\_s\_\_Citrobaci  
 PWY\_5695\_\_urate\_biosynthesis\_inosine\_5\_phosphate\_degradation\_g\_\_Coprobacter\_s\_\_Coprob  
 PWY\_5695\_\_urate\_biosynthesis\_inosine\_5\_phosphate\_degradation\_g\_\_Coproccoccus\_s\_\_Coproc  
 PWY\_5695\_\_urate\_biosynthesis\_inosine\_5\_phosphate\_degradation\_g\_\_Enterobacter\_s\_\_Enteroi  
 PWY\_5695\_\_urate\_biosynthesis\_inosine\_5\_phosphate\_degradation\_g\_\_Eubacterium\_s\_\_Eubacte



PWY\_5695\_\_urate\_biosynthesis\_inosine\_5\_phosphate\_degradation\_g\_Klebsiella\_s\_Klebsiella

PWY\_5695\_\_urate\_biosynthesis\_inosine\_5\_phosphate\_degradation\_g\_Lactococcus\_s\_Lactococcus

PWY\_5695\_\_urate\_biosynthesis\_inosine\_5\_phosphate\_degradation\_g\_Odoribacter\_s\_Odoribacter

PWY\_5695\_\_urate\_biosynthesis\_inosine\_5\_phosphate\_degradation\_g\_Parabacteroides\_s\_Parabacteroides

PWY\_5695\_\_urate\_biosynthesis\_inosine\_5\_phosphate\_degradation\_g\_Parabacteroides\_s\_Parabacteroides

PWY\_5695\_\_urate\_biosynthesis\_inosine\_5\_phosphate\_degradation\_g\_Parabacteroides\_s\_Parabacteroides

PWY\_5695\_\_urate\_biosynthesis\_inosine\_5\_phosphate\_degradation\_g\_Parabacteroides\_s\_Parabacteroides

PWY\_5695\_\_urate\_biosynthesis\_inosine\_5\_phosphate\_degradation\_g\_Parabacteroides\_s\_Parabacteroides

PWY\_5695\_\_urate\_biosynthesis\_inosine\_5\_phosphate\_degradation\_g\_Peptostreptococcaceae

PWY\_5695\_\_urate\_biosynthesis\_inosine\_5\_phosphate\_degradation\_g\_Roseburia\_s\_Roseburia

PWY\_5695\_\_urate\_biosynthesis\_inosine\_5\_phosphate\_degradation\_g\_Ruminococcus\_s\_Ruminococcus

PWY\_5705\_\_allantoin\_degradation\_to\_glyoxylate\_III\_unclassified

PWY\_5723\_\_Rubisco\_shunt\_g\_Citrobacter\_s\_Citrobacter\_freundii

PWY\_5747\_\_2\_methylcitrate\_cycle\_II

PWY\_5747\_\_2\_methylcitrate\_cycle\_II\_g\_Citrobacter\_s\_Citrobacter\_freundii

PWY\_5747\_\_2\_methylcitrate\_cycle\_II\_unclassified

PWY\_5791\_\_1,4\_dihydroxy\_2\_naphthoate\_biosynthesis\_II\_(plants)\_g\_Lactococcus\_s\_Lactococcus

PWY\_5837\_\_1,4\_dihydroxy\_2\_naphthoate\_biosynthesis\_I\_g\_Lactococcus\_s\_Lactococcus\_lactis

PWY\_5838\_\_superpathway\_of\_menaquinol\_8\_biosynthesis\_I\_unclassified

PWY\_5845\_\_superpathway\_of\_menaquinol\_9\_biosynthesis\_unclassified

PWY\_5850\_\_superpathway\_of\_menaquinol\_6\_biosynthesis\_I\_unclassified

PWY\_5855\_\_ubiquinol\_7\_biosynthesis\_(prokaryotic)\_g\_Citrobacter\_s\_Citrobacter\_freundii

PWY\_5855\_\_ubiquinol\_7\_biosynthesis\_(prokaryotic)\_g\_Enterobacter\_s\_Enterobacter\_cloacae

PWY\_5855\_\_ubiquinol\_7\_biosynthesis\_(prokaryotic)\_g\_Klebsiella\_s\_Klebsiella\_pneumoniae

PWY\_5855\_\_ubiquinol\_7\_biosynthesis\_(prokaryotic)\_unclassified

PWY\_5856\_\_ubiquinol\_9\_biosynthesis\_(prokaryotic)\_g\_Citrobacter\_s\_Citrobacter\_freundii

PWY\_5856\_\_ubiquinol\_9\_biosynthesis\_(prokaryotic)\_g\_Enterobacter\_s\_Enterobacter\_cloacae

PWY\_5856\_\_ubiquinol\_9\_biosynthesis\_(prokaryotic)\_g\_Klebsiella\_s\_Klebsiella\_pneumoniae

PWY\_5856\_\_ubiquinol\_9\_biosynthesis\_(prokaryotic)\_unclassified

PWY\_5857\_\_ubiquinol\_10\_biosynthesis\_(prokaryotic)\_g\_Citrobacter\_s\_Citrobacter\_freundii

PWY\_5857\_\_ubiquinol\_10\_biosynthesis\_(prokaryotic)\_g\_Enterobacter\_s\_Enterobacter\_cloacae

PWY\_5857\_\_ubiquinol\_10\_biosynthesis\_(prokaryotic)\_g\_Klebsiella\_s\_Klebsiella\_pneumoniae

PWY\_5857\_\_ubiquinol\_10\_biosynthesis\_(prokaryotic)\_unclassified

PWY\_5860\_\_superpathway\_of\_demethylmenaquinol\_6\_biosynthesis\_I\_unclassified

PWY\_5861\_\_superpathway\_of\_demethylmenaquinol\_8\_biosynthesis\_unclassified

PWY\_5862\_\_superpathway\_of\_demethylmenaquinol\_9\_biosynthesis\_unclassified

PWY\_5896\_\_superpathway\_of\_menaquinol\_10\_biosynthesis\_unclassified

PWY\_5913\_\_TCA\_cycle\_VI\_(obligate\_autotrophs)\_g\_Citrobacter\_s\_Citrobacter\_freundii

PWY\_5918\_\_superpathway\_of\_heme\_biosynthesis\_from\_glutamate\_g\_Citrobacter\_s\_Citrobacter\_freundii

PWY\_5918\_\_superpathway\_of\_heme\_biosynthesis\_from\_glutamate\_g\_Enterobacter\_s\_Enterobacter\_cloacae

PWY\_5918\_\_superpathway\_of\_heme\_biosynthesis\_from\_glutamate\_g\_Propionibacterium\_s\_Propionibacterium

PWY\_5918\_\_superpathway\_of\_heme\_biosynthesis\_from\_glutamate\_unclassified

PWY\_5920\_\_superpathway\_of\_heme\_biosynthesis\_from\_glycine\_g\_Propionibacterium\_s\_Propionibacterium

PWY\_5920\_\_superpathway\_of\_heme\_biosynthesis\_from\_glycine\_unclassified

PWY\_5989\_\_stearate\_biosynthesis\_II\_(bacteria\_and\_plants)\_g\_Bacteroides\_s\_Bacteroides\_sp.

PWY\_5989\_\_stearate\_biosynthesis\_II\_(bacteria\_and\_plants)\_g\_Bacteroides\_s\_Bacteroides\_xylanolyticus

PWY\_5989\_\_stearate\_biosynthesis\_II\_(bacteria\_and\_plants)\_g\_Citrobacter\_s\_Citrobacter\_freundii

PWY\_5989\_stearate\_biosynthesis\_II\_(bacteria\_and\_plants)\_g\_Enterobacter\_s\_Enterobacter\_cl  
PWY\_5989\_stearate\_biosynthesis\_II\_(bacteria\_and\_plants)\_g\_Haemophilus\_s\_Haemophilus\_p  
PWY\_5989\_stearate\_biosynthesis\_II\_(bacteria\_and\_plants)\_g\_Klebsiella\_s\_Klebsiella\_pneumo  
PWY\_5994\_palmitate\_biosynthesis\_I\_(animals\_and\_fungi)  
PWY\_6121\_5\_aminimidazole\_ribonucleotide\_biosynthesis\_I\_g\_Adlercreutzia\_s\_Adlercreutzia  
PWY\_6121\_5\_aminimidazole\_ribonucleotide\_biosynthesis\_I\_g\_Akkermansia\_s\_Akkermansia  
PWY\_6121\_5\_aminimidazole\_ribonucleotide\_biosynthesis\_I\_g\_Alistipes\_s\_Alistipes\_finegold  
PWY\_6121\_5\_aminimidazole\_ribonucleotide\_biosynthesis\_I\_g\_Alistipes\_s\_Alistipes\_onderdo  
PWY\_6121\_5\_aminimidazole\_ribonucleotide\_biosynthesis\_I\_g\_Alistipes\_s\_Alistipes\_putredin  
PWY\_6121\_5\_aminimidazole\_ribonucleotide\_biosynthesis\_I\_g\_Alistipes\_s\_Alistipes\_sp\_HGB!  
PWY\_6121\_5\_aminimidazole\_ribonucleotide\_biosynthesis\_I\_g\_Anaerofustis\_s\_Anaerofustis  
PWY\_6121\_5\_aminimidazole\_ribonucleotide\_biosynthesis\_I\_g\_Anaerostipes\_s\_Anaerostipes  
PWY\_6121\_5\_aminimidazole\_ribonucleotide\_biosynthesis\_I\_g\_Anaerotruncus\_s\_Anaerotrunc  
PWY\_6121\_5\_aminimidazole\_ribonucleotide\_biosynthesis\_I\_g\_Bacteroides\_s\_Bacteroides\_sp  
PWY\_6121\_5\_aminimidazole\_ribonucleotide\_biosynthesis\_I\_g\_Bilophila\_s\_Bilophila\_wadsw  
PWY\_6121\_5\_aminimidazole\_ribonucleotide\_biosynthesis\_I\_g\_Blautia\_s\_Blautia\_hydrogenot  
PWY\_6121\_5\_aminimidazole\_ribonucleotide\_biosynthesis\_I\_g\_Blautia\_s\_Blautia\_sp\_KLE\_173  
PWY\_6121\_5\_aminimidazole\_ribonucleotide\_biosynthesis\_I\_g\_Blautia\_s\_Ruminococcus\_gna  
PWY\_6121\_5\_aminimidazole\_ribonucleotide\_biosynthesis\_I\_g\_Blautia\_s\_Ruminococcus\_obe  
PWY\_6121\_5\_aminimidazole\_ribonucleotide\_biosynthesis\_I\_g\_Blautia\_s\_Ruminococcus\_torc  
PWY\_6121\_5\_aminimidazole\_ribonucleotide\_biosynthesis\_I\_g\_Burkholderiales\_noname\_s\_B  
PWY\_6121\_5\_aminimidazole\_ribonucleotide\_biosynthesis\_I\_g\_Butyrvibrio\_s\_Butyrvibrio\_cr  
PWY\_6121\_5\_aminimidazole\_ribonucleotide\_biosynthesis\_I\_g\_Catenibacterium\_s\_Catenibac  
PWY\_6121\_5\_aminimidazole\_ribonucleotide\_biosynthesis\_I\_g\_Clostridiales\_noname\_s\_Bact  
PWY\_6121\_5\_aminimidazole\_ribonucleotide\_biosynthesis\_I\_g\_Clostridiales\_noname\_s\_Clost  
PWY\_6121\_5\_aminimidazole\_ribonucleotide\_biosynthesis\_I\_g\_Clostridium\_s\_Clostridium\_as  
PWY\_6121\_5\_aminimidazole\_ribonucleotide\_biosynthesis\_I\_g\_Clostridium\_s\_Clostridium\_cl  
PWY\_6121\_5\_aminimidazole\_ribonucleotide\_biosynthesis\_I\_g\_Clostridium\_s\_Clostridium\_ha  
PWY\_6121\_5\_aminimidazole\_ribonucleotide\_biosynthesis\_I\_g\_Clostridium\_s\_Clostridium\_le  
PWY\_6121\_5\_aminimidazole\_ribonucleotide\_biosynthesis\_I\_g\_Clostridium\_s\_Clostridium\_sp  
PWY\_6121\_5\_aminimidazole\_ribonucleotide\_biosynthesis\_I\_g\_Clostridium\_s\_Clostridium\_sp  
PWY\_6121\_5\_aminimidazole\_ribonucleotide\_biosynthesis\_I\_g\_Collinsella\_s\_Collinsella\_intes  
PWY\_6121\_5\_aminimidazole\_ribonucleotide\_biosynthesis\_I\_g\_Collinsella\_s\_Collinsella\_tanal  
PWY\_6121\_5\_aminimidazole\_ribonucleotide\_biosynthesis\_I\_g\_Coprococcus\_s\_Coprococcus  
PWY\_6121\_5\_aminimidazole\_ribonucleotide\_biosynthesis\_I\_g\_Coprococcus\_s\_Coprococcus  
PWY\_6121\_5\_aminimidazole\_ribonucleotide\_biosynthesis\_I\_g\_Dialister\_s\_Dialister\_invisu  
PWY\_6121\_5\_aminimidazole\_ribonucleotide\_biosynthesis\_I\_g\_Dorea\_s\_Dorea\_formicigener  
PWY\_6121\_5\_aminimidazole\_ribonucleotide\_biosynthesis\_I\_g\_Eggerthella\_s\_Eggerthella\_ler  
PWY\_6121\_5\_aminimidazole\_ribonucleotide\_biosynthesis\_I\_g\_Eggerthella\_s\_Eggerthella\_sp  
PWY\_6121\_5\_aminimidazole\_ribonucleotide\_biosynthesis\_I\_g\_Eggerthella\_s\_Eggerthella\_sp  
PWY\_6121\_5\_aminimidazole\_ribonucleotide\_biosynthesis\_I\_g\_Enterococcus\_s\_Enterococcus  
PWY\_6121\_5\_aminimidazole\_ribonucleotide\_biosynthesis\_I\_g\_Enterococcus\_s\_Enterococcus  
PWY\_6121\_5\_aminimidazole\_ribonucleotide\_biosynthesis\_I\_g\_Enterococcus\_s\_Enterococcus  
PWY\_6121\_5\_aminimidazole\_ribonucleotide\_biosynthesis\_I\_g>Erysipelotrichaceae\_noname\_s  
PWY\_6121\_5\_aminimidazole\_ribonucleotide\_biosynthesis\_I\_g>Erysipelotrichaceae\_noname\_s  
PWY\_6121\_5\_aminimidazole\_ribonucleotide\_biosynthesis\_I\_g>Erysipelotrichaceae\_noname\_s  
PWY\_6121\_5\_aminimidazole\_ribonucleotide\_biosynthesis\_I\_g>Eubacterium\_s>Eubacterium

PWY\_6121\_5\_aminoimidazole\_ribonucleotide\_biosynthesis\_I\_g\_Eubacterium\_s\_Eubacterium\_

PWY\_6121\_5\_aminoimidazole\_ribonucleotide\_biosynthesis\_I\_g\_Eubacterium\_s\_Eubacterium\_

PWY\_6121\_5\_aminoimidazole\_ribonucleotide\_biosynthesis\_I\_g\_Eubacterium\_s\_Eubacterium\_

PWY\_6121\_5\_aminoimidazole\_ribonucleotide\_biosynthesis\_I\_g\_Fusobacterium\_s\_Fusobacteri

PWY\_6121\_5\_aminoimidazole\_ribonucleotide\_biosynthesis\_I\_g\_Gemella\_s\_Gemella\_sanguini

PWY\_6121\_5\_aminoimidazole\_ribonucleotide\_biosynthesis\_I\_g\_Holdemania\_s\_Holdemania\_f

PWY\_6121\_5\_aminoimidazole\_ribonucleotide\_biosynthesis\_I\_g\_Klebsiella\_s\_Klebsiella\_pneun

PWY\_6121\_5\_aminoimidazole\_ribonucleotide\_biosynthesis\_I\_g\_Lachnospiraceae\_noname\_s\_

PWY\_6121\_5\_aminoimidazole\_ribonucleotide\_biosynthesis\_I\_g\_Lachnospiraceae\_noname\_s\_

PWY\_6121\_5\_aminoimidazole\_ribonucleotide\_biosynthesis\_I\_g\_Lachnospiraceae\_noname\_s\_

PWY\_6121\_5\_aminoimidazole\_ribonucleotide\_biosynthesis\_I\_g\_Lachnospiraceae\_noname\_s\_

PWY\_6121\_5\_aminoimidazole\_ribonucleotide\_biosynthesis\_I\_g\_Lachnospiraceae\_noname\_s\_

PWY\_6121\_5\_aminoimidazole\_ribonucleotide\_biosynthesis\_I\_g\_Lactobacillus\_s\_Lactobacillus\_

PWY\_6121\_5\_aminoimidazole\_ribonucleotide\_biosynthesis\_I\_g\_Lactobacillus\_s\_Lactobacillus\_

PWY\_6121\_5\_aminoimidazole\_ribonucleotide\_biosynthesis\_I\_g\_Lactococcus\_s\_Lactococcus\_la

PWY\_6121\_5\_aminoimidazole\_ribonucleotide\_biosynthesis\_I\_g\_Odoribacter\_s\_Odoribacter\_la

PWY\_6121\_5\_aminoimidazole\_ribonucleotide\_biosynthesis\_I\_g\_Odoribacter\_s\_Odoribacter\_s

PWY\_6121\_5\_aminoimidazole\_ribonucleotide\_biosynthesis\_I\_g\_Oxalobacter\_s\_Oxalobacter\_fi

PWY\_6121\_5\_aminoimidazole\_ribonucleotide\_biosynthesis\_I\_g\_Parasutterella\_s\_Parasutterel

PWY\_6121\_5\_aminoimidazole\_ribonucleotide\_biosynthesis\_I\_g\_Pediococcus\_s\_Pediococcus\_a

PWY\_6121\_5\_aminoimidazole\_ribonucleotide\_biosynthesis\_I\_g\_Pediococcus\_s\_Pediococcus\_I

PWY\_6121\_5\_aminoimidazole\_ribonucleotide\_biosynthesis\_I\_g\_Peptostreptococcaceae\_nonam

PWY\_6121\_5\_aminoimidazole\_ribonucleotide\_biosynthesis\_I\_g\_Phascalactobacterium\_s\_Pha

PWY\_6121\_5\_aminoimidazole\_ribonucleotide\_biosynthesis\_I\_g\_Propionibacterium\_s\_Propion

PWY\_6121\_5\_aminoimidazole\_ribonucleotide\_biosynthesis\_I\_g\_Roseburia\_s\_Roseburia\_homi

PWY\_6121\_5\_aminoimidazole\_ribonucleotide\_biosynthesis\_I\_g\_Roseburia\_s\_Roseburia\_inulir

PWY\_6121\_5\_aminoimidazole\_ribonucleotide\_biosynthesis\_I\_g\_Ruminococcaceae\_noname\_s\_

PWY\_6121\_5\_aminoimidazole\_ribonucleotide\_biosynthesis\_I\_g\_Ruminococcus\_s\_Ruminococc

PWY\_6121\_5\_aminoimidazole\_ribonucleotide\_biosynthesis\_I\_g\_Ruminococcus\_s\_Ruminococc

PWY\_6121\_5\_aminoimidazole\_ribonucleotide\_biosynthesis\_I\_g\_Ruminococcus\_s\_Ruminococc

PWY\_6121\_5\_aminoimidazole\_ribonucleotide\_biosynthesis\_I\_g\_Slackia\_s\_Slackia\_piriformis

PWY\_6121\_5\_aminoimidazole\_ribonucleotide\_biosynthesis\_I\_g\_Solobacterium\_s\_Solobacteriu

PWY\_6121\_5\_aminoimidazole\_ribonucleotide\_biosynthesis\_I\_g\_Subdoligranulum\_s\_Subdoligr

PWY\_6121\_5\_aminoimidazole\_ribonucleotide\_biosynthesis\_I\_g\_Veillonella\_s\_Veillonella\_disp

PWY\_6121\_5\_aminoimidazole\_ribonucleotide\_biosynthesis\_I\_g\_Veillonella\_s\_Veillonella\_parv

PWY\_6122\_5\_aminoimidazole\_ribonucleotide\_biosynthesis\_II\_g\_Adlercreutzia\_s\_Adlercreutzia

PWY\_6122\_5\_aminoimidazole\_ribonucleotide\_biosynthesis\_II\_g\_Akkermansia\_s\_Akkermansia

PWY\_6122\_5\_aminoimidazole\_ribonucleotide\_biosynthesis\_II\_g\_Alistipes\_s\_Alistipes\_finegola

PWY\_6122\_5\_aminoimidazole\_ribonucleotide\_biosynthesis\_II\_g\_Alistipes\_s\_Alistipes\_ponderosa

PWY\_6122\_5\_aminoimidazole\_ribonucleotide\_biosynthesis\_II\_g\_Alistipes\_s\_Alistipes\_putredii

PWY\_6122\_5\_aminoimidazole\_ribonucleotide\_biosynthesis\_II\_g\_Alistipes\_s\_Alistipes\_sp\_HGB

PWY\_6122\_5\_aminoimidazole\_ribonucleotide\_biosynthesis\_II\_g>Anaerofustis\_s>Anaerofustis\_

PWY\_6122\_5\_aminoimidazole\_ribonucleotide\_biosynthesis\_II\_g>Anaerostipes\_s>Anaerostipes

PWY\_6122\_5\_aminoimidazole\_ribonucleotide\_biosynthesis\_II\_g>Anaerotruncus\_s>Anaerotruncus

PWY\_6122\_5\_aminoimidazole\_ribonucleotide\_biosynthesis\_II\_g>Bacteroides\_s>Bacteroides\_s

PWY\_6122\_5\_aminoimidazole\_ribonucleotide\_biosynthesis\_II\_g>Bifidobacterium\_s>Bifidobact

PWY\_6122\_5\_aminoimidazole\_ribonucleotide\_biosynthesis\_II\_g>Bifidobacterium\_s>Bifidobact

PWY\_6122\_5\_aminoimidazole\_ribonucleotide\_biosynthesis\_II\_g\_Bifidobacterium\_s\_Bifidobact  
PWY\_6122\_5\_aminoimidazole\_ribonucleotide\_biosynthesis\_II\_g\_Bifidobacterium\_s\_Bifidobact  
PWY\_6122\_5\_aminoimidazole\_ribonucleotide\_biosynthesis\_II\_g\_Bifidobacterium\_s\_Bifidobact  
PWY\_6122\_5\_aminoimidazole\_ribonucleotide\_biosynthesis\_II\_g\_Bilophila\_s\_Bilophila\_wadsw  
PWY\_6122\_5\_aminoimidazole\_ribonucleotide\_biosynthesis\_II\_g\_Blautia\_s\_Blautia\_hydrogeno  
PWY\_6122\_5\_aminoimidazole\_ribonucleotide\_biosynthesis\_II\_g\_Blautia\_s\_Blautia\_sp\_KLE\_17  
PWY\_6122\_5\_aminoimidazole\_ribonucleotide\_biosynthesis\_II\_g\_Blautia\_s\_Ruminococcus\_gna  
PWY\_6122\_5\_aminoimidazole\_ribonucleotide\_biosynthesis\_II\_g\_Blautia\_s\_Ruminococcus\_obe  
PWY\_6122\_5\_aminoimidazole\_ribonucleotide\_biosynthesis\_II\_g\_Blautia\_s\_Ruminococcus\_tori  
PWY\_6122\_5\_aminoimidazole\_ribonucleotide\_biosynthesis\_II\_g\_Burkholderiales\_noname\_s\_\_E  
PWY\_6122\_5\_aminoimidazole\_ribonucleotide\_biosynthesis\_II\_g\_Butyrvibrio\_s\_Butyrvibrio\_c  
PWY\_6122\_5\_aminoimidazole\_ribonucleotide\_biosynthesis\_II\_g\_Catenibacterium\_s\_Cateniba  
PWY\_6122\_5\_aminoimidazole\_ribonucleotide\_biosynthesis\_II\_g\_Clostridiales\_noname\_s\_\_Bact  
PWY\_6122\_5\_aminoimidazole\_ribonucleotide\_biosynthesis\_II\_g\_Clostridiales\_noname\_s\_\_Clos  
PWY\_6122\_5\_aminoimidazole\_ribonucleotide\_biosynthesis\_II\_g\_Clostridium\_s\_\_Clostridium\_a  
PWY\_6122\_5\_aminoimidazole\_ribonucleotide\_biosynthesis\_II\_g\_Clostridium\_s\_\_Clostridium\_cl  
PWY\_6122\_5\_aminoimidazole\_ribonucleotide\_biosynthesis\_II\_g\_Clostridium\_s\_\_Clostridium\_h  
PWY\_6122\_5\_aminoimidazole\_ribonucleotide\_biosynthesis\_II\_g\_Clostridium\_s\_\_Clostridium\_le  
PWY\_6122\_5\_aminoimidazole\_ribonucleotide\_biosynthesis\_II\_g\_Clostridium\_s\_\_Clostridium\_p  
PWY\_6122\_5\_aminoimidazole\_ribonucleotide\_biosynthesis\_II\_g\_Clostridium\_s\_\_Clostridium\_sp  
PWY\_6122\_5\_aminoimidazole\_ribonucleotide\_biosynthesis\_II\_g\_Clostridium\_s\_\_Clostridium\_sp  
PWY\_6122\_5\_aminoimidazole\_ribonucleotide\_biosynthesis\_II\_g\_Collinsella\_s\_\_Collinsella\_inte  
PWY\_6122\_5\_aminoimidazole\_ribonucleotide\_biosynthesis\_II\_g\_Collinsella\_s\_\_Collinsella\_tana  
PWY\_6122\_5\_aminoimidazole\_ribonucleotide\_biosynthesis\_II\_g\_Coprococcus\_s\_\_Coprococcus  
PWY\_6122\_5\_aminoimidazole\_ribonucleotide\_biosynthesis\_II\_g\_Coprococcus\_s\_\_Coprococcus  
PWY\_6122\_5\_aminoimidazole\_ribonucleotide\_biosynthesis\_II\_g\_Dialister\_s\_\_Dialister\_invisus  
PWY\_6122\_5\_aminoimidazole\_ribonucleotide\_biosynthesis\_II\_g\_Dorea\_s\_\_Dorea\_formicigener  
PWY\_6122\_5\_aminoimidazole\_ribonucleotide\_biosynthesis\_II\_g\_Eggerthella\_s\_\_Eggerthella\_le  
PWY\_6122\_5\_aminoimidazole\_ribonucleotide\_biosynthesis\_II\_g\_Eggerthella\_s\_\_Eggerthella\_sp  
PWY\_6122\_5\_aminoimidazole\_ribonucleotide\_biosynthesis\_II\_g\_Eggerthella\_s\_\_Eggerthella\_sp  
PWY\_6122\_5\_aminoimidazole\_ribonucleotide\_biosynthesis\_II\_g\_Enterobacter\_s\_\_Enterobacter  
PWY\_6122\_5\_aminoimidazole\_ribonucleotide\_biosynthesis\_II\_g\_Enterococcus\_s\_\_Enterococcu  
PWY\_6122\_5\_aminoimidazole\_ribonucleotide\_biosynthesis\_II\_g\_Enterococcus\_s\_\_Enterococcu  
PWY\_6122\_5\_aminoimidazole\_ribonucleotide\_biosynthesis\_II\_g\_Enterococcus\_s\_\_Enterococcu  
PWY\_6122\_5\_aminoimidazole\_ribonucleotide\_biosynthesis\_II\_g\_Enterorhabdus\_s\_\_Enterorhab  
PWY\_6122\_5\_aminoimidazole\_ribonucleotide\_biosynthesis\_II\_g>Erysipelotrichaceae\_noname\_  
PWY\_6122\_5\_aminoimidazole\_ribonucleotide\_biosynthesis\_II\_g>Erysipelotrichaceae\_noname\_  
PWY\_6122\_5\_aminoimidazole\_ribonucleotide\_biosynthesis\_II\_g>Erysipelotrichaceae\_noname\_  
PWY\_6122\_5\_aminoimidazole\_ribonucleotide\_biosynthesis\_II\_g>Eubacterium\_s\_\_Eubacterium  
PWY\_6122\_5\_aminoimidazole\_ribonucleotide\_biosynthesis\_II\_g>Eubacterium\_s\_\_Eubacterium  
PWY\_6122\_5\_aminoimidazole\_ribonucleotide\_biosynthesis\_II\_g>Eubacterium\_s\_\_Eubacterium  
PWY\_6122\_5\_aminoimidazole\_ribonucleotide\_biosynthesis\_II\_g>Eubacterium\_s\_\_Eubacterium  
PWY\_6122\_5\_aminoimidazole\_ribonucleotide\_biosynthesis\_II\_g>Fusobacterium\_s\_\_Fusobacter  
PWY\_6122\_5\_aminoimidazole\_ribonucleotide\_biosynthesis\_II\_g>Gemella\_s\_\_Gemella\_sanguin  
PWY\_6122\_5\_aminoimidazole\_ribonucleotide\_biosynthesis\_II\_g>Holdemania\_s\_\_Holdemania\_  
PWY\_6122\_5\_aminoimidazole\_ribonucleotide\_biosynthesis\_II\_g>Klebsiella\_s\_\_Klebsiella\_pneu  
PWY\_6122\_5\_aminoimidazole\_ribonucleotide\_biosynthesis\_II\_g>Lachnospiraceae\_noname\_s\_\_

PWY\_6122\_5\_aminimidazole\_ribonucleotide\_biosynthesis\_II\_g\_Lachnospiraceae\_noname\_s  
PWY\_6122\_5\_aminimidazole\_ribonucleotide\_biosynthesis\_II\_g\_Lachnospiraceae\_noname\_s  
PWY\_6122\_5\_aminimidazole\_ribonucleotide\_biosynthesis\_II\_g\_Lachnospiraceae\_noname\_s  
PWY\_6122\_5\_aminimidazole\_ribonucleotide\_biosynthesis\_II\_g\_Lachnospiraceae\_noname\_s  
PWY\_6122\_5\_aminimidazole\_ribonucleotide\_biosynthesis\_II\_g\_Lachnospiraceae\_noname\_s  
PWY\_6122\_5\_aminimidazole\_ribonucleotide\_biosynthesis\_II\_g\_Lactobacillus\_s\_Lactobacillus  
PWY\_6122\_5\_aminimidazole\_ribonucleotide\_biosynthesis\_II\_g\_Lactobacillus\_s\_Lactobacillus  
PWY\_6122\_5\_aminimidazole\_ribonucleotide\_biosynthesis\_II\_g\_Lactobacillus\_s\_Lactobacillus  
PWY\_6122\_5\_aminimidazole\_ribonucleotide\_biosynthesis\_II\_g\_Lactobacillus\_s\_Lactobacillus  
PWY\_6122\_5\_aminimidazole\_ribonucleotide\_biosynthesis\_II\_g\_Odoribacter\_s\_Odoribacter\_I  
PWY\_6122\_5\_aminimidazole\_ribonucleotide\_biosynthesis\_II\_g\_Odoribacter\_s\_Odoribacter\_s  
PWY\_6122\_5\_aminimidazole\_ribonucleotide\_biosynthesis\_II\_g\_Odoribacter\_s\_Odoribacter\_s  
PWY\_6122\_5\_aminimidazole\_ribonucleotide\_biosynthesis\_II\_g\_Oxalobacter\_s\_Oxalobacter\_I  
PWY\_6122\_5\_aminimidazole\_ribonucleotide\_biosynthesis\_II\_g\_Parasutterella\_s\_Parasuttere  
PWY\_6122\_5\_aminimidazole\_ribonucleotide\_biosynthesis\_II\_g\_Pediococcus\_s\_Pediococcus\_  
PWY\_6122\_5\_aminimidazole\_ribonucleotide\_biosynthesis\_II\_g\_Pediococcus\_s\_Pediococcus\_  
PWY\_6122\_5\_aminimidazole\_ribonucleotide\_biosynthesis\_II\_g\_Peptostreptococcaceae\_nonar  
PWY\_6122\_5\_aminimidazole\_ribonucleotide\_biosynthesis\_II\_g\_Phascolarctobacterium\_s\_Ph  
PWY\_6122\_5\_aminimidazole\_ribonucleotide\_biosynthesis\_II\_g\_Propionibacterium\_s\_Propior  
PWY\_6122\_5\_aminimidazole\_ribonucleotide\_biosynthesis\_II\_g\_Roseburia\_s\_Roseburia\_hom  
PWY\_6122\_5\_aminimidazole\_ribonucleotide\_biosynthesis\_II\_g\_Roseburia\_s\_Roseburia\_inuli  
PWY\_6122\_5\_aminimidazole\_ribonucleotide\_biosynthesis\_II\_g\_Ruminococcaceae\_noname\_s  
PWY\_6122\_5\_aminimidazole\_ribonucleotide\_biosynthesis\_II\_g\_Ruminococcus\_s\_Ruminococ  
PWY\_6122\_5\_aminimidazole\_ribonucleotide\_biosynthesis\_II\_g\_Ruminococcus\_s\_Ruminococ  
PWY\_6122\_5\_aminimidazole\_ribonucleotide\_biosynthesis\_II\_g\_Ruminococcus\_s\_Ruminococ  
PWY\_6122\_5\_aminimidazole\_ribonucleotide\_biosynthesis\_II\_g\_Ruminococcus\_s\_Ruminococ  
PWY\_6122\_5\_aminimidazole\_ribonucleotide\_biosynthesis\_II\_g\_Ruminococcus\_s\_Ruminococ  
PWY\_6122\_5\_aminimidazole\_ribonucleotide\_biosynthesis\_II\_g\_Slackia\_s\_Slackia\_piriformis  
PWY\_6122\_5\_aminimidazole\_ribonucleotide\_biosynthesis\_II\_g\_Solobacterium\_s\_Solobacteri  
PWY\_6122\_5\_aminimidazole\_ribonucleotide\_biosynthesis\_II\_g\_Streptococcus\_s\_Streptococc  
PWY\_6122\_5\_aminimidazole\_ribonucleotide\_biosynthesis\_II\_g\_Subdoligranulum\_s\_Subdolidig  
PWY\_6122\_5\_aminimidazole\_ribonucleotide\_biosynthesis\_II\_g\_Veillonella\_s\_Veillonella\_dis  
PWY\_6122\_5\_aminimidazole\_ribonucleotide\_biosynthesis\_II\_g\_Veillonella\_s\_Veillonella\_par  
PWY\_6123\_inosine\_5\_phosphate\_biosynthesis\_I\_g\_Bacteroides\_s\_Bacteroides\_faecis  
PWY\_6123\_inosine\_5\_phosphate\_biosynthesis\_I\_g\_Bacteroides\_s\_Bacteroides\_fineworldii  
PWY\_6123\_inosine\_5\_phosphate\_biosynthesis\_I\_g\_Bacteroides\_s\_Bacteroides\_fragilis  
PWY\_6123\_inosine\_5\_phosphate\_biosynthesis\_I\_g\_Bacteroides\_s\_Bacteroides\_ovatus  
PWY\_6123\_inosine\_5\_phosphate\_biosynthesis\_I\_g\_Bacteroides\_s\_Bacteroides\_salyersiae  
PWY\_6123\_inosine\_5\_phosphate\_biosynthesis\_I\_g\_Bacteroides\_s\_Bacteroides\_sp\_1\_1\_30  
PWY\_6123\_inosine\_5\_phosphate\_biosynthesis\_I\_g\_Bacteroides\_s\_Bacteroides\_sp\_1\_1\_6  
PWY\_6123\_inosine\_5\_phosphate\_biosynthesis\_I\_g\_Bacteroides\_s\_Bacteroides\_sp\_2\_1\_22  
PWY\_6123\_inosine\_5\_phosphate\_biosynthesis\_I\_g\_Bacteroides\_s\_Bacteroides\_sp\_2\_2\_4  
PWY\_6123\_inosine\_5\_phosphate\_biosynthesis\_I\_g\_Bacteroides\_s\_Bacteroides\_sp\_3\_1\_23  
PWY\_6123\_inosine\_5\_phosphate\_biosynthesis\_I\_g\_Bacteroides\_s\_Bacteroides\_thetaiotaomi  
PWY\_6123\_inosine\_5\_phosphate\_biosynthesis\_I\_g\_Bacteroides\_s\_Bacteroides\_xylanisolvans  
PWY\_6123\_inosine\_5\_phosphate\_biosynthesis\_I\_g\_Citrobacter\_s\_Citrobacter\_freundii  
PWY\_6123\_inosine\_5\_phosphate\_biosynthesis\_I\_g\_Clostridium\_s\_Clostridium\_perfringens  
PWY\_6123\_inosine\_5\_phosphate\_biosynthesis\_I\_g\_Coproccoccus\_s\_Coproccoccus\_catus  
PWY\_6123\_inosine\_5\_phosphate\_biosynthesis\_I\_g\_Coproccoccus\_s\_Coproccoccus\_eutactus  
PWY\_6123\_inosine\_5\_phosphate\_biosynthesis\_I\_g\_Coproccoccus\_s\_Coproccoccus\_sp\_ART55\_  
PWY\_6123\_inosine\_5\_phosphate\_biosynthesis\_I\_g\_Enterobacter\_s\_Enterobacter Cloacae

PWY\_6123\_\_inosine\_5\_\_phosphate\_biosynthesis\_I\_g\_\_Enterococcus\_s\_\_Enterococcus\_faecium  
PWY\_6123\_\_inosine\_5\_\_phosphate\_biosynthesis\_I\_g\_\_Eubacterium\_s\_\_Eubacterium\_siraeum  
PWY\_6123\_\_inosine\_5\_\_phosphate\_biosynthesis\_I\_g\_\_Klebsiella\_s\_\_Klebsiella\_pneumoniae  
PWY\_6123\_\_inosine\_5\_\_phosphate\_biosynthesis\_I\_g\_\_Lachnospiraceae\_noname\_s\_\_Lachnospira  
PWY\_6123\_\_inosine\_5\_\_phosphate\_biosynthesis\_I\_g\_\_Lactobacillus\_s\_\_Lactobacillus\_casei\_para  
PWY\_6123\_\_inosine\_5\_\_phosphate\_biosynthesis\_I\_g\_\_Lactococcus\_s\_\_Lactococcus\_lactis  
PWY\_6123\_\_inosine\_5\_\_phosphate\_biosynthesis\_I\_g\_\_Ruminococcus\_s\_\_Ruminococcus\_champa  
PWY\_6123\_\_inosine\_5\_\_phosphate\_biosynthesis\_I\_g\_\_Streptococcus\_s\_\_Streptococcus\_mitis\_or  
PWY\_6124\_\_inosine\_5\_\_phosphate\_biosynthesis\_II\_g\_\_Bacteroides\_s\_\_Bacteroides\_faecis  
PWY\_6124\_\_inosine\_5\_\_phosphate\_biosynthesis\_II\_g\_\_Bacteroides\_s\_\_Bacteroides\_finegoldii  
PWY\_6124\_\_inosine\_5\_\_phosphate\_biosynthesis\_II\_g\_\_Bacteroides\_s\_\_Bacteroides\_ovatus  
PWY\_6124\_\_inosine\_5\_\_phosphate\_biosynthesis\_II\_g\_\_Bacteroides\_s\_\_Bacteroides\_salyersiae  
PWY\_6124\_\_inosine\_5\_\_phosphate\_biosynthesis\_II\_g\_\_Bacteroides\_s\_\_Bacteroides\_sp\_1\_1\_30  
PWY\_6124\_\_inosine\_5\_\_phosphate\_biosynthesis\_II\_g\_\_Bacteroides\_s\_\_Bacteroides\_sp\_1\_1\_6  
PWY\_6124\_\_inosine\_5\_\_phosphate\_biosynthesis\_II\_g\_\_Bacteroides\_s\_\_Bacteroides\_sp\_2\_1\_22  
PWY\_6124\_\_inosine\_5\_\_phosphate\_biosynthesis\_II\_g\_\_Bacteroides\_s\_\_Bacteroides\_sp\_2\_2\_4  
PWY\_6124\_\_inosine\_5\_\_phosphate\_biosynthesis\_II\_g\_\_Bacteroides\_s\_\_Bacteroides\_sp\_3\_1\_23  
PWY\_6124\_\_inosine\_5\_\_phosphate\_biosynthesis\_II\_g\_\_Bacteroides\_s\_\_Bacteroides\_thetaiotaom  
PWY\_6124\_\_inosine\_5\_\_phosphate\_biosynthesis\_II\_g\_\_Bacteroides\_s\_\_Bacteroides\_xylanisolven  
PWY\_6124\_\_inosine\_5\_\_phosphate\_biosynthesis\_II\_g\_\_Citrobacter\_s\_\_Citrobacter\_freundii  
PWY\_6124\_\_inosine\_5\_\_phosphate\_biosynthesis\_II\_g\_\_Clostridium\_s\_\_Clostridium\_perfringens  
PWY\_6124\_\_inosine\_5\_\_phosphate\_biosynthesis\_II\_g\_\_Clostridium\_s\_\_Clostridium\_sp\_L2\_50  
PWY\_6124\_\_inosine\_5\_\_phosphate\_biosynthesis\_II\_g\_\_Coprococcus\_s\_\_Coprococcus\_catus  
PWY\_6124\_\_inosine\_5\_\_phosphate\_biosynthesis\_II\_g\_\_Coprococcus\_s\_\_Coprococcus\_eutactus  
PWY\_6124\_\_inosine\_5\_\_phosphate\_biosynthesis\_II\_g\_\_Coprococcus\_s\_\_Coprococcus\_sp\_ART55  
PWY\_6124\_\_inosine\_5\_\_phosphate\_biosynthesis\_II\_g\_\_Enterobacter\_s\_\_Enterobacter\_cloacae  
PWY\_6124\_\_inosine\_5\_\_phosphate\_biosynthesis\_II\_g\_\_Enterococcus\_s\_\_Enterococcus\_faecium  
PWY\_6124\_\_inosine\_5\_\_phosphate\_biosynthesis\_II\_g\_\_Eubacterium\_s\_\_Eubacterium\_siraeum  
PWY\_6124\_\_inosine\_5\_\_phosphate\_biosynthesis\_II\_g\_\_Fusobacterium\_s\_\_Fusobacterium\_nuclea  
PWY\_6124\_\_inosine\_5\_\_phosphate\_biosynthesis\_II\_g\_\_Klebsiella\_s\_\_Klebsiella\_pneumoniae  
PWY\_6124\_\_inosine\_5\_\_phosphate\_biosynthesis\_II\_g\_\_Lachnospiraceae\_noname\_s\_\_Lachnospira  
PWY\_6124\_\_inosine\_5\_\_phosphate\_biosynthesis\_II\_g\_\_Lactobacillus\_s\_\_Lactobacillus\_casei\_para  
PWY\_6124\_\_inosine\_5\_\_phosphate\_biosynthesis\_II\_g\_\_Lactobacillus\_s\_\_Lactobacillus\_rhamnosu  
PWY\_6124\_\_inosine\_5\_\_phosphate\_biosynthesis\_II\_g\_\_Lactococcus\_s\_\_Lactococcus\_lactis  
PWY\_6124\_\_inosine\_5\_\_phosphate\_biosynthesis\_II\_g\_\_Ruminococcus\_s\_\_Ruminococcus\_champa  
PWY\_6124\_\_inosine\_5\_\_phosphate\_biosynthesis\_II\_g\_\_Streptococcus\_s\_\_Streptococcus\_mitis\_or  
PWY\_6125\_\_superpathway\_of\_guanosine\_nucleotides\_de\_novo\_biosynthesis\_II\_g\_\_Actinomyces  
PWY\_6125\_\_superpathway\_of\_guanosine\_nucleotides\_de\_novo\_biosynthesis\_II\_g\_\_Bacteroides  
PWY\_6125\_\_superpathway\_of\_guanosine\_nucleotides\_de\_novo\_biosynthesis\_II\_g\_\_Bacteroides  
PWY\_6125\_\_superpathway\_of\_guanosine\_nucleotides\_de\_novo\_biosynthesis\_II\_g\_\_Bacteroides  
PWY\_6125\_\_superpathway\_of\_guanosine\_nucleotides\_de\_novo\_biosynthesis\_II\_g\_\_Bacteroides  
PWY\_6125\_\_superpathway\_of\_guanosine\_nucleotides\_de\_novo\_biosynthesis\_II\_g\_\_Burkholderia  
PWY\_6125\_\_superpathway\_of\_guanosine\_nucleotides\_de\_novo\_biosynthesis\_II\_g\_\_Citrobacter\_s  
PWY\_6125\_\_superpathway\_of\_guanosine\_nucleotides\_de\_novo\_biosynthesis\_II\_g\_\_Clostridium  
PWY\_6125\_\_superpathway\_of\_guanosine\_nucleotides\_de\_novo\_biosynthesis\_II\_g\_\_Eggerthella\_s  
PWY\_6125\_\_superpathway\_of\_guanosine\_nucleotides\_de\_novo\_biosynthesis\_II\_g\_\_Eggerthella\_s

PWY\_6125\_\_superpathway\_of\_guanosine\_nucleotides\_de\_novo\_biosynthesis\_II\_g\_Eggerthella\_s

PWY\_6125\_\_superpathway\_of\_guanosine\_nucleotides\_de\_novo\_biosynthesis\_II\_g\_Klebsiella\_s

PWY\_6125\_\_superpathway\_of\_guanosine\_nucleotides\_de\_novo\_biosynthesis\_II\_g\_Parasutterell

PWY\_6125\_\_superpathway\_of\_guanosine\_nucleotides\_de\_novo\_biosynthesis\_II\_g\_Streptococcu

PWY\_6125\_\_superpathway\_of\_guanosine\_nucleotides\_de\_novo\_biosynthesis\_II\_g\_Streptococcu

PWY\_6125\_\_superpathway\_of\_guanosine\_nucleotides\_de\_novo\_biosynthesis\_II\_g\_Veillonella\_s

PWY\_6125\_\_superpathway\_of\_guanosine\_nucleotides\_de\_novo\_biosynthesis\_II\_g\_Veillonella\_s

PWY\_6126\_\_superpathway\_of\_adenosine\_nucleotides\_de\_novo\_biosynthesis\_II\_g\_Bacteroides

PWY\_6126\_\_superpathway\_of\_adenosine\_nucleotides\_de\_novo\_biosynthesis\_II\_g\_Bacteroides

PWY\_6126\_\_superpathway\_of\_adenosine\_nucleotides\_de\_novo\_biosynthesis\_II\_g\_Bacteroides

PWY\_6126\_\_superpathway\_of\_adenosine\_nucleotides\_de\_novo\_biosynthesis\_II\_g\_Bacteroides

PWY\_6126\_\_superpathway\_of\_adenosine\_nucleotides\_de\_novo\_biosynthesis\_II\_g\_Bacteroides

PWY\_6126\_\_superpathway\_of\_adenosine\_nucleotides\_de\_novo\_biosynthesis\_II\_g\_Bacteroides

PWY\_6126\_\_superpathway\_of\_adenosine\_nucleotides\_de\_novo\_biosynthesis\_II\_g\_Citrobacter\_s

PWY\_6126\_\_superpathway\_of\_adenosine\_nucleotides\_de\_novo\_biosynthesis\_II\_g\_Clostridiales

PWY\_6126\_\_superpathway\_of\_adenosine\_nucleotides\_de\_novo\_biosynthesis\_II\_g\_Clostridium

PWY\_6126\_\_superpathway\_of\_adenosine\_nucleotides\_de\_novo\_biosynthesis\_II\_g\_Clostridium

PWY\_6126\_\_superpathway\_of\_adenosine\_nucleotides\_de\_novo\_biosynthesis\_II\_g\_Collinsella\_s

PWY\_6126\_\_superpathway\_of\_adenosine\_nucleotides\_de\_novo\_biosynthesis\_II\_g\_Collinsella\_s

PWY\_6126\_\_superpathway\_of\_adenosine\_nucleotides\_de\_novo\_biosynthesis\_II\_g\_Eggerthella\_s

PWY\_6126\_\_superpathway\_of\_adenosine\_nucleotides\_de\_novo\_biosynthesis\_II\_g\_Eggerthella\_s

PWY\_6126\_\_superpathway\_of\_adenosine\_nucleotides\_de\_novo\_biosynthesis\_II\_g\_Eggerthella\_s

PWY\_6126\_\_superpathway\_of\_adenosine\_nucleotides\_de\_novo\_biosynthesis\_II\_g\_Eggerthella\_s

PWY\_6126\_\_superpathway\_of\_adenosine\_nucleotides\_de\_novo\_biosynthesis\_II\_g\_Faecalibacter

PWY\_6126\_\_superpathway\_of\_adenosine\_nucleotides\_de\_novo\_biosynthesis\_II\_g\_Holdemania

PWY\_6126\_\_superpathway\_of\_adenosine\_nucleotides\_de\_novo\_biosynthesis\_II\_g\_Klebsiella\_s

PWY\_6126\_\_superpathway\_of\_adenosine\_nucleotides\_de\_novo\_biosynthesis\_II\_g\_Oxalobacter

PWY\_6126\_\_superpathway\_of\_adenosine\_nucleotides\_de\_novo\_biosynthesis\_II\_g\_Slackia\_s\_Sl

PWY\_6126\_\_superpathway\_of\_adenosine\_nucleotides\_de\_novo\_biosynthesis\_II\_g\_Solobacteriu

PWY\_6126\_\_superpathway\_of\_adenosine\_nucleotides\_de\_novo\_biosynthesis\_II\_g\_Streptococcu

PWY\_6126\_\_superpathway\_of\_adenosine\_nucleotides\_de\_novo\_biosynthesis\_II\_g\_Streptococcu

PWY\_6126\_\_superpathway\_of\_adenosine\_nucleotides\_de\_novo\_biosynthesis\_II\_g\_Veillonella\_s

PWY\_6126\_\_superpathway\_of\_adenosine\_nucleotides\_de\_novo\_biosynthesis\_II\_g\_Veillonella\_s

PWY\_6147\_\_6\_hydroxymethyl\_dihydropterin\_diphosphate\_biosynthesis\_I\_g\_Bacteroides\_s\_Ba

PWY\_6147\_\_6\_hydroxymethyl\_dihydropterin\_diphosphate\_biosynthesis\_I\_g\_Bacteroides\_s\_Ba

PWY\_6147\_\_6\_hydroxymethyl\_dihydropterin\_diphosphate\_biosynthesis\_I\_g\_Bacteroides\_s\_Ba

PWY\_6147\_\_6\_hydroxymethyl\_dihydropterin\_diphosphate\_biosynthesis\_I\_g\_Bacteroides\_s\_Ba

PWY\_6147\_\_6\_hydroxymethyl\_dihydropterin\_diphosphate\_biosynthesis\_I\_g\_Bacteroides\_s\_Ba

PWY\_6147\_\_6\_hydroxymethyl\_dihydropterin\_diphosphate\_biosynthesis\_I\_g\_Bacteroides\_s\_Ba

PWY\_6147\_\_6\_hydroxymethyl\_dihydropterin\_diphosphate\_biosynthesis\_I\_g\_Citrobacter\_s\_Citr

PWY\_6147\_\_6\_hydroxymethyl\_dihydropterin\_diphosphate\_biosynthesis\_I\_g\_Streptococcus\_s\_s

PWY\_6147\_\_6\_hydroxymethyl\_dihydropterin\_diphosphate\_biosynthesis\_I\_g\_Veillonella\_s\_Veill

PWY\_6147\_\_6\_hydroxymethyl\_dihydropterin\_diphosphate\_biosynthesis\_I\_g\_Veillonella\_s\_Veill

PWY\_6151\_\_S\_adenosyl\_L\_methionine\_cycle\_I\_g\_Actinomyces\_s\_Actinomyces\_odontolyticus

PWY\_6151\_\_S\_adenosyl\_L\_methionine\_cycle\_I\_g\_Anaerostipes\_s\_Anaerostipes\_hadrus

PWY\_6151\_\_S\_adenosyl\_L\_methionine\_cycle\_I\_g>Anaerotruncus\_s\_Anaerotruncus\_colihominis

PWY\_6151\_\_S\_adenosyl\_L\_methionine\_cycle\_I\_g\_Bacteroides\_s\_Bacteroides\_dorei

PWY\_6151\_\_S\_adenosyl\_L\_methionine\_cycle\_I\_g\_Bacteroides\_s\_Bacteroides\_eggerthii

PWY\_6151\_\_S\_adenosyl\_L\_methionine\_cycle\_l\_g\_Bacteroides\_s\_Bacteroides\_massiliensis  
PWY\_6151\_\_S\_adenosyl\_L\_methionine\_cycle\_l\_g\_Bacteroides\_s\_Bacteroides\_sp\_3\_1\_33FAA  
PWY\_6151\_\_S\_adenosyl\_L\_methionine\_cycle\_l\_g\_Bacteroides\_s\_Bacteroides\_sp\_3\_1\_40A  
PWY\_6151\_\_S\_adenosyl\_L\_methionine\_cycle\_l\_g\_Bacteroides\_s\_Bacteroides\_sp\_4\_3\_47FAA  
PWY\_6151\_\_S\_adenosyl\_L\_methionine\_cycle\_l\_g\_Bacteroides\_s\_Bacteroides\_sp\_9\_1\_42FAA  
PWY\_6151\_\_S\_adenosyl\_L\_methionine\_cycle\_l\_g\_Bacteroides\_s\_Bacteroides\_sp\_D20  
PWY\_6151\_\_S\_adenosyl\_L\_methionine\_cycle\_l\_g\_Bacteroides\_s\_Bacteroides\_stercoris  
PWY\_6151\_\_S\_adenosyl\_L\_methionine\_cycle\_l\_g\_Bacteroides\_s\_Bacteroides\_uniformis  
PWY\_6151\_\_S\_adenosyl\_L\_methionine\_cycle\_l\_g\_Barnesiella\_s\_Barnesiella\_intestinihominis  
PWY\_6151\_\_S\_adenosyl\_L\_methionine\_cycle\_l\_g\_Bifidobacterium\_s\_Bifidobacterium\_angulatu  
PWY\_6151\_\_S\_adenosyl\_L\_methionine\_cycle\_l\_g\_Bifidobacterium\_s\_Bifidobacterium\_animalis  
PWY\_6151\_\_S\_adenosyl\_L\_methionine\_cycle\_l\_g\_Bifidobacterium\_s\_Bifidobacterium\_dentium  
PWY\_6151\_\_S\_adenosyl\_L\_methionine\_cycle\_l\_g\_Blautia\_s\_Blautia\_hydrogenotrophica  
PWY\_6151\_\_S\_adenosyl\_L\_methionine\_cycle\_l\_g\_Blautia\_s\_Blautia\_sp\_KLE\_1732  
PWY\_6151\_\_S\_adenosyl\_L\_methionine\_cycle\_l\_g\_Blautia\_s\_Ruminococcus\_gnavus  
PWY\_6151\_\_S\_adenosyl\_L\_methionine\_cycle\_l\_g\_Blautia\_s\_Ruminococcus\_obeum  
PWY\_6151\_\_S\_adenosyl\_L\_methionine\_cycle\_l\_g\_Butyrivibrio\_s\_Butyrivibrio\_crossotus  
PWY\_6151\_\_S\_adenosyl\_L\_methionine\_cycle\_l\_g\_Catenibacterium\_s\_Catenibacterium\_mitsuoi  
PWY\_6151\_\_S\_adenosyl\_L\_methionine\_cycle\_l\_g\_Citrobacter\_s\_Citrobacter\_freundii  
PWY\_6151\_\_S\_adenosyl\_L\_methionine\_cycle\_l\_g\_Clostridiales\_noname\_s\_Bacteroides\_pectinc  
PWY\_6151\_\_S\_adenosyl\_L\_methionine\_cycle\_l\_g\_Clostridiales\_noname\_s\_Clostridiales\_bacter  
PWY\_6151\_\_S\_adenosyl\_L\_methionine\_cycle\_l\_g\_Clostridium\_s\_Clostridium\_asparagiforme  
PWY\_6151\_\_S\_adenosyl\_L\_methionine\_cycle\_l\_g\_Clostridium\_s\_Clostridium\_citroniae  
PWY\_6151\_\_S\_adenosyl\_L\_methionine\_cycle\_l\_g\_Clostridium\_s\_Clostridium\_clostridioforme  
PWY\_6151\_\_S\_adenosyl\_L\_methionine\_cycle\_l\_g\_Clostridium\_s\_Clostridium\_hathewayi  
PWY\_6151\_\_S\_adenosyl\_L\_methionine\_cycle\_l\_g\_Clostridium\_s\_Clostridium\_leptum  
PWY\_6151\_\_S\_adenosyl\_L\_methionine\_cycle\_l\_g\_Clostridium\_s\_Clostridium\_perfringens  
PWY\_6151\_\_S\_adenosyl\_L\_methionine\_cycle\_l\_g\_Clostridium\_s\_Clostridium\_sp\_L2\_50  
PWY\_6151\_\_S\_adenosyl\_L\_methionine\_cycle\_l\_g\_Clostridium\_s\_Clostridium\_sp\_SS2\_1  
PWY\_6151\_\_S\_adenosyl\_L\_methionine\_cycle\_l\_g\_Coprobacter\_s\_Coprobacter\_fastidiosus  
PWY\_6151\_\_S\_adenosyl\_L\_methionine\_cycle\_l\_g\_Coprococcus\_s\_Coprococcus\_catus  
PWY\_6151\_\_S\_adenosyl\_L\_methionine\_cycle\_l\_g\_Coprococcus\_s\_Coprococcus\_eutactus  
PWY\_6151\_\_S\_adenosyl\_L\_methionine\_cycle\_l\_g\_Coprococcus\_s\_Coprococcus\_sp\_ART55\_1  
PWY\_6151\_\_S\_adenosyl\_L\_methionine\_cycle\_l\_g\_Dorea\_s\_Dorea\_formicigenerans  
PWY\_6151\_\_S\_adenosyl\_L\_methionine\_cycle\_l\_g\_Erysipelotrichaceae\_noname\_s\_Clostridium\_  
PWY\_6151\_\_S\_adenosyl\_L\_methionine\_cycle\_l\_g\_Erysipelotrichaceae\_noname\_s\_Erysipelotricl  
PWY\_6151\_\_S\_adenosyl\_L\_methionine\_cycle\_l\_g\_Erysipelotrichaceae\_noname\_s\_Eubacterium\_  
PWY\_6151\_\_S\_adenosyl\_L\_methionine\_cycle\_l\_g\_Erysipelotrichaceae\_noname\_s\_Eubacterium\_  
PWY\_6151\_\_S\_adenosyl\_L\_methionine\_cycle\_l\_g\_Eubacterium\_s\_Eubacterium\_eligens  
PWY\_6151\_\_S\_adenosyl\_L\_methionine\_cycle\_l\_g\_Eubacterium\_s\_Eubacterium\_hallii  
PWY\_6151\_\_S\_adenosyl\_L\_methionine\_cycle\_l\_g\_Eubacterium\_s\_Eubacterium\_sp\_3\_1\_31  
PWY\_6151\_\_S\_adenosyl\_L\_methionine\_cycle\_l\_g\_Eubacterium\_s\_Eubacterium\_ventriosum  
PWY\_6151\_\_S\_adenosyl\_L\_methionine\_cycle\_l\_g\_Fusobacterium\_s\_Fusobacterium\_nucleatum  
PWY\_6151\_\_S\_adenosyl\_L\_methionine\_cycle\_l\_g\_Gemella\_s\_Gemella\_sanguinis  
PWY\_6151\_\_S\_adenosyl\_L\_methionine\_cycle\_l\_g\_Klebsiella\_s\_Klebsiella\_pneumoniae  
PWY\_6151\_\_S\_adenosyl\_L\_methionine\_cycle\_l\_g\_Lachnospiraceae\_noname\_s\_Lachnospiraceae  
PWY\_6151\_\_S\_adenosyl\_L\_methionine\_cycle\_l\_g\_Lachnospiraceae\_noname\_s\_Lachnospiraceae



PWY\_6151\_\_S\_adenosyl\_L\_methionine\_cycle\_l\_g\_Lachnospiraceae\_noname\_s\_Lachnospiraceae

PWY\_6151\_\_S\_adenosyl\_L\_methionine\_cycle\_l\_g\_Lactobacillus\_s\_Lactobacillus\_casei\_paracase

PWY\_6151\_\_S\_adenosyl\_L\_methionine\_cycle\_l\_g\_Lactobacillus\_s\_Lactobacillus\_fermentum

PWY\_6151\_\_S\_adenosyl\_L\_methionine\_cycle\_l\_g\_Lactobacillus\_s\_Lactobacillus\_rhamnosus

PWY\_6151\_\_S\_adenosyl\_L\_methionine\_cycle\_l\_g\_Lactobacillus\_s\_Lactobacillus\_ruminis

PWY\_6151\_\_S\_adenosyl\_L\_methionine\_cycle\_l\_g\_Lactobacillus\_s\_Lactobacillus\_salivarius

PWY\_6151\_\_S\_adenosyl\_L\_methionine\_cycle\_l\_g\_Odoribacter\_s\_Odoribacter\_laneus

PWY\_6151\_\_S\_adenosyl\_L\_methionine\_cycle\_l\_g\_Odoribacter\_s\_Odoribacter\_splanchnicus

PWY\_6151\_\_S\_adenosyl\_L\_methionine\_cycle\_l\_g\_Paraprevotella\_s\_Paraprevotella\_clara

PWY\_6151\_\_S\_adenosyl\_L\_methionine\_cycle\_l\_g\_Peptostreptococcaceae\_noname\_s\_Clostridium

PWY\_6151\_\_S\_adenosyl\_L\_methionine\_cycle\_l\_g\_Prevotella\_s\_Prevotella\_copri

PWY\_6151\_\_S\_adenosyl\_L\_methionine\_cycle\_l\_g\_Propionibacterium\_s\_Propionibacterium\_fre

PWY\_6151\_\_S\_adenosyl\_L\_methionine\_cycle\_l\_g\_Roseburia\_s\_Roseburia\_inulinivorans

PWY\_6151\_\_S\_adenosyl\_L\_methionine\_cycle\_l\_g\_Ruminococcus\_s\_Ruminococcus\_callidus

PWY\_6151\_\_S\_adenosyl\_L\_methionine\_cycle\_l\_g\_Ruminococcus\_s\_Ruminococcus\_champanell

PWY\_6151\_\_S\_adenosyl\_L\_methionine\_cycle\_l\_g\_Ruminococcus\_s\_Ruminococcus\_sp

PWY\_6151\_\_S\_adenosyl\_L\_methionine\_cycle\_l\_g\_Slackia\_s\_Slackia\_piriformis

PWY\_6151\_\_S\_adenosyl\_L\_methionine\_cycle\_l\_g\_Streptococcus\_s\_Streptococcus\_australis

PWY\_6151\_\_S\_adenosyl\_L\_methionine\_cycle\_l\_g\_Streptococcus\_s\_Streptococcus\_mitis\_oralis

PWY\_6151\_\_S\_adenosyl\_L\_methionine\_cycle\_l\_g\_Streptococcus\_s\_Streptococcus\_sanguinis

PWY\_6151\_\_S\_adenosyl\_L\_methionine\_cycle\_l\_g\_Subdoligranulum\_s\_Subdoligranulum\_sp\_4\_3

PWY\_6163\_\_chorismate\_biosynthesis\_from\_3\_dehydroquinone\_g\_Akkermansia\_s\_Akkermansia

PWY\_6163\_\_chorismate\_biosynthesis\_from\_3\_dehydroquinone\_g\_Alistipes\_s\_Alistipes\_finegold

PWY\_6163\_\_chorismate\_biosynthesis\_from\_3\_dehydroquinone\_g\_Alistipes\_s\_Alistipes\_shahii

PWY\_6163\_\_chorismate\_biosynthesis\_from\_3\_dehydroquinone\_g\_Alistipes\_s\_Alistipes\_sp\_HGE

PWY\_6163\_\_chorismate\_biosynthesis\_from\_3\_dehydroquinone\_g>Anaerostipes\_s>Anaerostipes

PWY\_6163\_\_chorismate\_biosynthesis\_from\_3\_dehydroquinone\_g>Anaerotruncus\_s>Anaerotruncus

PWY\_6163\_\_chorismate\_biosynthesis\_from\_3\_dehydroquinone\_g\_Bacteroides\_s\_Bacteroides\_f

PWY\_6163\_\_chorismate\_biosynthesis\_from\_3\_dehydroquinone\_g\_Bilophila\_s\_Bilophila\_wadsw

PWY\_6163\_\_chorismate\_biosynthesis\_from\_3\_dehydroquinone\_g\_Blautia\_s\_Blautia\_sp\_KLE\_17

PWY\_6163\_\_chorismate\_biosynthesis\_from\_3\_dehydroquinone\_g\_Blautia\_s\_Ruminococcus\_gn

PWY\_6163\_\_chorismate\_biosynthesis\_from\_3\_dehydroquinone\_g\_Blautia\_s\_Ruminococcus\_obe

PWY\_6163\_\_chorismate\_biosynthesis\_from\_3\_dehydroquinone\_g\_Burkholderiales\_noname\_s\_l

PWY\_6163\_\_chorismate\_biosynthesis\_from\_3\_dehydroquinone\_g\_Butyrivibrio\_s\_Butyrivibrio\_c

PWY\_6163\_\_chorismate\_biosynthesis\_from\_3\_dehydroquinone\_g\_Citrobacter\_s\_Citrobacter\_fr

PWY\_6163\_\_chorismate\_biosynthesis\_from\_3\_dehydroquinone\_g\_Clostridiales\_noname\_s\_Clos

PWY\_6163\_\_chorismate\_biosynthesis\_from\_3\_dehydroquinone\_g\_Clostridium\_s\_Clostridium\_a

PWY\_6163\_\_chorismate\_biosynthesis\_from\_3\_dehydroquinone\_g\_Clostridium\_s\_Clostridium\_b

PWY\_6163\_\_chorismate\_biosynthesis\_from\_3\_dehydroquinone\_g\_Clostridium\_s\_Clostridium\_c

PWY\_6163\_\_chorismate\_biosynthesis\_from\_3\_dehydroquinone\_g\_Clostridium\_s\_Clostridium\_h

PWY\_6163\_\_chorismate\_biosynthesis\_from\_3\_dehydroquinone\_g\_Clostridium\_s\_Clostridium\_s

PWY\_6163\_\_chorismate\_biosynthesis\_from\_3\_dehydroquinone\_g\_Clostridium\_s\_Clostridium\_s

PWY\_6163\_\_chorismate\_biosynthesis\_from\_3\_dehydroquinone\_g\_Clostridium\_s\_Clostridium\_s

PWY\_6163\_\_chorismate\_biosynthesis\_from\_3\_dehydroquinone\_g\_Clostridium\_s\_Clostridium\_s

PWY\_6163\_\_chorismate\_biosynthesis\_from\_3\_dehydroquinone\_g\_Coproccoccus\_s\_Coproccoccus

PWY\_6163\_\_chorismate\_biosynthesis\_from\_3\_dehydroquinone\_g\_Dorea\_s\_Dorea\_formicigenes

PWY\_6163\_\_chorismate\_biosynthesis\_from\_3\_dehydroquinone\_g\_Dorea\_s\_Dorea\_longicatena

PWY\_6163\_\_chorismate\_biosynthesis\_from\_3\_dehydroquinone\_g\_Enterococcus\_s\_Enterococcus

PWY\_6163\_\_chorismate\_biosynthesis\_from\_3\_dehydroquinat\_e\_g\_\_Erysipelotrichaceae\_noname\_s

PWY\_6163\_\_chorismate\_biosynthesis\_from\_3\_dehydroquinat\_e\_g\_\_Erysipelotrichaceae\_noname\_s

PWY\_6163\_\_chorismate\_biosynthesis\_from\_3\_dehydroquinat\_e\_g\_\_Eubacterium\_s\_\_Eubacterium

PWY\_6163\_\_chorismate\_biosynthesis\_from\_3\_dehydroquinat\_e\_g\_\_Eubacterium\_s\_\_Eubacterium

PWY\_6163\_\_chorismate\_biosynthesis\_from\_3\_dehydroquinat\_e\_g\_\_Eubacterium\_s\_\_Eubacterium

PWY\_6163\_\_chorismate\_biosynthesis\_from\_3\_dehydroquinat\_e\_g\_\_Eubacterium\_s\_\_Eubacterium

PWY\_6163\_\_chorismate\_biosynthesis\_from\_3\_dehydroquinat\_e\_g\_\_Fusobacterium\_s\_\_Fusobacter

PWY\_6163\_\_chorismate\_biosynthesis\_from\_3\_dehydroquinat\_e\_g\_\_Klebsiella\_s\_\_Klebsiella\_pneu

PWY\_6163\_\_chorismate\_biosynthesis\_from\_3\_dehydroquinat\_e\_g\_\_Lachnospiraceae\_noname\_s

PWY\_6163\_\_chorismate\_biosynthesis\_from\_3\_dehydroquinat\_e\_g\_\_Lachnospiraceae\_noname\_s

PWY\_6163\_\_chorismate\_biosynthesis\_from\_3\_dehydroquinat\_e\_g\_\_Lachnospiraceae\_noname\_s

PWY\_6163\_\_chorismate\_biosynthesis\_from\_3\_dehydroquinat\_e\_g\_\_Lachnospiraceae\_noname\_s

PWY\_6163\_\_chorismate\_biosynthesis\_from\_3\_dehydroquinat\_e\_g\_\_Lachnospiraceae\_noname\_s

PWY\_6163\_\_chorismate\_biosynthesis\_from\_3\_dehydroquinat\_e\_g\_\_Lactobacillus\_s\_\_Lactobacillus

PWY\_6163\_\_chorismate\_biosynthesis\_from\_3\_dehydroquinat\_e\_g\_\_Lactococcus\_s\_\_Lactococcus

PWY\_6163\_\_chorismate\_biosynthesis\_from\_3\_dehydroquinat\_e\_g\_\_Parasutterella\_s\_\_Parasuttere

PWY\_6163\_\_chorismate\_biosynthesis\_from\_3\_dehydroquinat\_e\_g\_\_Peptostreptococcaceae\_nonar

PWY\_6163\_\_chorismate\_biosynthesis\_from\_3\_dehydroquinat\_e\_g\_\_Phascolarctobacterium\_s\_\_Ph

PWY\_6163\_\_chorismate\_biosynthesis\_from\_3\_dehydroquinat\_e\_g\_\_Propionibacterium\_s\_\_Propio

PWY\_6163\_\_chorismate\_biosynthesis\_from\_3\_dehydroquinat\_e\_g\_\_Roseburia\_s\_\_Roseburia\_hom

PWY\_6163\_\_chorismate\_biosynthesis\_from\_3\_dehydroquinat\_e\_g\_\_Roseburia\_s\_\_Roseburia\_inuli

PWY\_6163\_\_chorismate\_biosynthesis\_from\_3\_dehydroquinat\_e\_g\_\_Ruminococcus\_s\_\_Ruminococ

PWY\_6163\_\_chorismate\_biosynthesis\_from\_3\_dehydroquinat\_e\_g\_\_Ruminococcus\_s\_\_Ruminococ

PWY\_6163\_\_chorismate\_biosynthesis\_from\_3\_dehydroquinat\_e\_g\_\_Ruminococcus\_s\_\_Ruminococ

PWY\_6163\_\_chorismate\_biosynthesis\_from\_3\_dehydroquinat\_e\_g\_\_Streptococcus\_s\_\_Streptococ

PWY\_6163\_\_chorismate\_biosynthesis\_from\_3\_dehydroquinat\_e\_g\_\_Streptococcus\_s\_\_Streptococ

PWY\_6168\_\_flavin\_biosynthesis\_III\_(fungi)\_g\_\_Anaerostipes\_s\_\_Anaerostipes\_hadrus

PWY\_6168\_\_flavin\_biosynthesis\_III\_(fungi)\_g\_\_Bacteroides\_s\_\_Bacteroides\_faecis

PWY\_6168\_\_flavin\_biosynthesis\_III\_(fungi)\_g\_\_Bacteroides\_s\_\_Bacteroides\_sp\_1\_1\_6

PWY\_6168\_\_flavin\_biosynthesis\_III\_(fungi)\_g\_\_Bacteroides\_s\_\_Bacteroides\_thetaiotaomicron

PWY\_6168\_\_flavin\_biosynthesis\_III\_(fungi)\_g\_\_Citrobacter\_s\_\_Citrobacter\_freundii

PWY\_6168\_\_flavin\_biosynthesis\_III\_(fungi)\_g\_\_Clostridium\_s\_\_Clostridium\_sp\_SS2\_1

PWY\_6168\_\_flavin\_biosynthesis\_III\_(fungi)\_g\_\_Lachnospiraceae\_noname\_s\_\_Lachnospiraceae\_ba

PWY\_6185\_\_4\_methylcatechol\_degradation\_(ortho\_cleavage)

PWY\_621\_\_sucrose\_degradation\_III\_(sucrose\_invertase)\_g\_\_Anaerostipes\_s\_\_Anaerostipes\_hadr

PWY\_621\_\_sucrose\_degradation\_III\_(sucrose\_invertase)\_g\_\_Bifidobacterium\_s\_\_Bifidobacterium

PWY\_621\_\_sucrose\_degradation\_III\_(sucrose\_invertase)\_g\_\_Blautia\_s\_\_Blautia\_sp\_KLE\_1732

PWY\_621\_\_sucrose\_degradation\_III\_(sucrose\_invertase)\_g\_\_Blautia\_s\_\_Ruminococcus\_obeum

PWY\_621\_\_sucrose\_degradation\_III\_(sucrose\_invertase)\_g\_\_Clostridiales\_noname\_s\_\_Clostridiale

PWY\_621\_\_sucrose\_degradation\_III\_(sucrose\_invertase)\_g\_\_Clostridium\_s\_\_Clostridium\_sp\_L2\_5

PWY\_621\_\_sucrose\_degradation\_III\_(sucrose\_invertase)\_g\_\_Clostridium\_s\_\_Clostridium\_sp\_SS2\_

PWY\_621\_\_sucrose\_degradation\_III\_(sucrose\_invertase)\_g\_\_Coproccoccus\_s\_\_Coproccoccus\_eutact

PWY\_621\_\_sucrose\_degradation\_III\_(sucrose\_invertase)\_g\_\_Coproccoccus\_s\_\_Coproccoccus\_sp\_AR

PWY\_621\_\_sucrose\_degradation\_III\_(sucrose\_invertase)\_g\_\_Enterococcus\_s\_\_Enterococcus\_faeci

PWY\_621\_\_sucrose\_degradation\_III\_(sucrose\_invertase)\_g\_\_Klebsiella\_s\_\_Klebsiella\_pneumoniae

PWY\_621\_\_sucrose\_degradation\_III\_(sucrose\_invertase)\_g\_\_Lachnospiraceae\_noname\_s\_\_Lachnc

PWY\_621\_\_sucrose\_degradation\_III\_(sucrose\_invertase)\_g\_\_Ruminococcus\_s\_\_Ruminococcus\_sp

PWY\_621\_\_sucrose\_degradation\_III\_(sucrose\_invertase)\_g\_\_Streptococcus\_s\_\_Streptococcus\_mit  
PWY\_622\_\_starch\_biosynthesis  
PWY\_6263\_\_superpathway\_of\_menaquinol\_8\_biosynthesis\_II  
PWY\_6270\_\_isoprene\_biosynthesis\_I\_g\_\_Citrobacter\_s\_\_Citrobacter\_freundii  
PWY\_6270\_\_isoprene\_biosynthesis\_I\_g\_\_Klebsiella\_s\_\_Klebsiella\_pneumoniae  
PWY\_6270\_\_isoprene\_biosynthesis\_I\_g\_\_Phascolarctobacterium\_s\_\_Phascolarctobacterium\_succi  
PWY\_6277\_\_superpathway\_of\_5\_aminoimidazole\_ribonucleotide\_biosynthesis\_g\_\_Adlercreutzia\_  
PWY\_6277\_\_superpathway\_of\_5\_aminoimidazole\_ribonucleotide\_biosynthesis\_g\_\_Akkermansia\_  
PWY\_6277\_\_superpathway\_of\_5\_aminoimidazole\_ribonucleotide\_biosynthesis\_g\_\_Alistipes\_s\_\_A  
PWY\_6277\_\_superpathway\_of\_5\_aminoimidazole\_ribonucleotide\_biosynthesis\_g\_\_Alistipes\_s\_\_A  
PWY\_6277\_\_superpathway\_of\_5\_aminoimidazole\_ribonucleotide\_biosynthesis\_g\_\_Alistipes\_s\_\_A  
PWY\_6277\_\_superpathway\_of\_5\_aminoimidazole\_ribonucleotide\_biosynthesis\_g\_\_Alistipes\_s\_\_A  
PWY\_6277\_\_superpathway\_of\_5\_aminoimidazole\_ribonucleotide\_biosynthesis\_g\_\_Anaerofustis\_  
PWY\_6277\_\_superpathway\_of\_5\_aminoimidazole\_ribonucleotide\_biosynthesis\_g\_\_Anaerostipes\_  
PWY\_6277\_\_superpathway\_of\_5\_aminoimidazole\_ribonucleotide\_biosynthesis\_g\_\_Anaerotruncus\_  
PWY\_6277\_\_superpathway\_of\_5\_aminoimidazole\_ribonucleotide\_biosynthesis\_g\_\_Bacteroides\_s\_  
PWY\_6277\_\_superpathway\_of\_5\_aminoimidazole\_ribonucleotide\_biosynthesis\_g\_\_Bifidobacteriu  
PWY\_6277\_\_superpathway\_of\_5\_aminoimidazole\_ribonucleotide\_biosynthesis\_g\_\_Bifidobacteriu  
PWY\_6277\_\_superpathway\_of\_5\_aminoimidazole\_ribonucleotide\_biosynthesis\_g\_\_Bifidobacteriu  
PWY\_6277\_\_superpathway\_of\_5\_aminoimidazole\_ribonucleotide\_biosynthesis\_g\_\_Bifidobacteriu  
PWY\_6277\_\_superpathway\_of\_5\_aminoimidazole\_ribonucleotide\_biosynthesis\_g\_\_Bifidobacteriu  
PWY\_6277\_\_superpathway\_of\_5\_aminoimidazole\_ribonucleotide\_biosynthesis\_g\_\_Bilophila\_s\_\_E  
PWY\_6277\_\_superpathway\_of\_5\_aminoimidazole\_ribonucleotide\_biosynthesis\_g\_\_Blautia\_s\_\_Bl  
PWY\_6277\_\_superpathway\_of\_5\_aminoimidazole\_ribonucleotide\_biosynthesis\_g\_\_Blautia\_s\_\_Bl  
PWY\_6277\_\_superpathway\_of\_5\_aminoimidazole\_ribonucleotide\_biosynthesis\_g\_\_Blautia\_s\_\_Ru  
PWY\_6277\_\_superpathway\_of\_5\_aminoimidazole\_ribonucleotide\_biosynthesis\_g\_\_Blautia\_s\_\_Ru  
PWY\_6277\_\_superpathway\_of\_5\_aminoimidazole\_ribonucleotide\_biosynthesis\_g\_\_Blautia\_s\_\_Ru  
PWY\_6277\_\_superpathway\_of\_5\_aminoimidazole\_ribonucleotide\_biosynthesis\_g\_\_Burkholderiale  
PWY\_6277\_\_superpathway\_of\_5\_aminoimidazole\_ribonucleotide\_biosynthesis\_g\_\_Butyrivibrio\_s\_  
PWY\_6277\_\_superpathway\_of\_5\_aminoimidazole\_ribonucleotide\_biosynthesis\_g\_\_Catenibacteriu  
PWY\_6277\_\_superpathway\_of\_5\_aminoimidazole\_ribonucleotide\_biosynthesis\_g\_\_Clostridiales\_r  
PWY\_6277\_\_superpathway\_of\_5\_aminoimidazole\_ribonucleotide\_biosynthesis\_g\_\_Clostridiales\_r  
PWY\_6277\_\_superpathway\_of\_5\_aminoimidazole\_ribonucleotide\_biosynthesis\_g\_\_Clostridium\_s\_  
PWY\_6277\_\_superpathway\_of\_5\_aminoimidazole\_ribonucleotide\_biosynthesis\_g\_\_Clostridium\_s\_  
PWY\_6277\_\_superpathway\_of\_5\_aminoimidazole\_ribonucleotide\_biosynthesis\_g\_\_Clostridium\_s\_  
PWY\_6277\_\_superpathway\_of\_5\_aminoimidazole\_ribonucleotide\_biosynthesis\_g\_\_Clostridium\_s\_  
PWY\_6277\_\_superpathway\_of\_5\_aminoimidazole\_ribonucleotide\_biosynthesis\_g\_\_Clostridium\_s\_  
PWY\_6277\_\_superpathway\_of\_5\_aminoimidazole\_ribonucleotide\_biosynthesis\_g\_\_Clostridium\_s\_  
PWY\_6277\_\_superpathway\_of\_5\_aminoimidazole\_ribonucleotide\_biosynthesis\_g\_\_Collinsella\_s\_  
PWY\_6277\_\_superpathway\_of\_5\_aminoimidazole\_ribonucleotide\_biosynthesis\_g\_\_Collinsella\_s\_  
PWY\_6277\_\_superpathway\_of\_5\_aminoimidazole\_ribonucleotide\_biosynthesis\_g\_\_Coproccoccus\_  
PWY\_6277\_\_superpathway\_of\_5\_aminoimidazole\_ribonucleotide\_biosynthesis\_g\_\_Coproccoccus\_  
PWY\_6277\_\_superpathway\_of\_5\_aminoimidazole\_ribonucleotide\_biosynthesis\_g\_\_Dialister\_s\_\_D  
PWY\_6277\_\_superpathway\_of\_5\_aminoimidazole\_ribonucleotide\_biosynthesis\_g\_\_Dorea\_s\_\_Dor  
PWY\_6277\_\_superpathway\_of\_5\_aminoimidazole\_ribonucleotide\_biosynthesis\_g\_\_Eggerthella\_s\_  
PWY\_6277\_\_superpathway\_of\_5\_aminoimidazole\_ribonucleotide\_biosynthesis\_g\_\_Eggerthella\_s\_

PWY\_6277\_\_superpathway\_of\_5\_aminoimidazole\_ribonucleotide\_biosynthesis\_g\_Eggerthella\_s  
PWY\_6277\_\_superpathway\_of\_5\_aminoimidazole\_ribonucleotide\_biosynthesis\_g\_Enterobacter\_  
PWY\_6277\_\_superpathway\_of\_5\_aminoimidazole\_ribonucleotide\_biosynthesis\_g\_Enterococcus\_  
PWY\_6277\_\_superpathway\_of\_5\_aminoimidazole\_ribonucleotide\_biosynthesis\_g\_Enterococcus\_  
PWY\_6277\_\_superpathway\_of\_5\_aminoimidazole\_ribonucleotide\_biosynthesis\_g\_Enterorhabdu  
PWY\_6277\_\_superpathway\_of\_5\_aminoimidazole\_ribonucleotide\_biosynthesis\_g\_Erysipelotricha  
PWY\_6277\_\_superpathway\_of\_5\_aminoimidazole\_ribonucleotide\_biosynthesis\_g\_Erysipelotricha  
PWY\_6277\_\_superpathway\_of\_5\_aminoimidazole\_ribonucleotide\_biosynthesis\_g\_Erysipelotricha  
PWY\_6277\_\_superpathway\_of\_5\_aminoimidazole\_ribonucleotide\_biosynthesis\_g\_Eubacterium\_  
PWY\_6277\_\_superpathway\_of\_5\_aminoimidazole\_ribonucleotide\_biosynthesis\_g\_Eubacterium\_  
PWY\_6277\_\_superpathway\_of\_5\_aminoimidazole\_ribonucleotide\_biosynthesis\_g\_Eubacterium\_  
PWY\_6277\_\_superpathway\_of\_5\_aminoimidazole\_ribonucleotide\_biosynthesis\_g\_Eubacterium\_  
PWY\_6277\_\_superpathway\_of\_5\_aminoimidazole\_ribonucleotide\_biosynthesis\_g\_Fusobacterium  
PWY\_6277\_\_superpathway\_of\_5\_aminoimidazole\_ribonucleotide\_biosynthesis\_g\_Gemella\_s\_G  
PWY\_6277\_\_superpathway\_of\_5\_aminoimidazole\_ribonucleotide\_biosynthesis\_g\_Holdemania\_s  
PWY\_6277\_\_superpathway\_of\_5\_aminoimidazole\_ribonucleotide\_biosynthesis\_g\_Klebsiella\_s\_  
PWY\_6277\_\_superpathway\_of\_5\_aminoimidazole\_ribonucleotide\_biosynthesis\_g\_Lachnospirace  
PWY\_6277\_\_superpathway\_of\_5\_aminoimidazole\_ribonucleotide\_biosynthesis\_g\_Lachnospirace  
PWY\_6277\_\_superpathway\_of\_5\_aminoimidazole\_ribonucleotide\_biosynthesis\_g\_Lachnospirace  
PWY\_6277\_\_superpathway\_of\_5\_aminoimidazole\_ribonucleotide\_biosynthesis\_g\_Lachnospirace  
PWY\_6277\_\_superpathway\_of\_5\_aminoimidazole\_ribonucleotide\_biosynthesis\_g\_Lachnospirace  
PWY\_6277\_\_superpathway\_of\_5\_aminoimidazole\_ribonucleotide\_biosynthesis\_g\_Lactobacillus\_  
PWY\_6277\_\_superpathway\_of\_5\_aminoimidazole\_ribonucleotide\_biosynthesis\_g\_Lactobacillus\_  
PWY\_6277\_\_superpathway\_of\_5\_aminoimidazole\_ribonucleotide\_biosynthesis\_g\_Lactobacillus\_  
PWY\_6277\_\_superpathway\_of\_5\_aminoimidazole\_ribonucleotide\_biosynthesis\_g\_Odoribacter\_s  
PWY\_6277\_\_superpathway\_of\_5\_aminoimidazole\_ribonucleotide\_biosynthesis\_g\_Odoribacter\_s  
PWY\_6277\_\_superpathway\_of\_5\_aminoimidazole\_ribonucleotide\_biosynthesis\_g\_Oxalobacter\_s  
PWY\_6277\_\_superpathway\_of\_5\_aminoimidazole\_ribonucleotide\_biosynthesis\_g\_Parasutterella  
PWY\_6277\_\_superpathway\_of\_5\_aminoimidazole\_ribonucleotide\_biosynthesis\_g\_Pediococcus\_s  
PWY\_6277\_\_superpathway\_of\_5\_aminoimidazole\_ribonucleotide\_biosynthesis\_g\_Pediococcus\_s  
PWY\_6277\_\_superpathway\_of\_5\_aminoimidazole\_ribonucleotide\_biosynthesis\_g\_Peptostreptoc  
PWY\_6277\_\_superpathway\_of\_5\_aminoimidazole\_ribonucleotide\_biosynthesis\_g\_Phascolarctob  
PWY\_6277\_\_superpathway\_of\_5\_aminoimidazole\_ribonucleotide\_biosynthesis\_g\_Propionibacte  
PWY\_6277\_\_superpathway\_of\_5\_aminoimidazole\_ribonucleotide\_biosynthesis\_g\_Roseburia\_s\_  
PWY\_6277\_\_superpathway\_of\_5\_aminoimidazole\_ribonucleotide\_biosynthesis\_g\_Roseburia\_s\_  
PWY\_6277\_\_superpathway\_of\_5\_aminoimidazole\_ribonucleotide\_biosynthesis\_g\_Ruminococcac  
PWY\_6277\_\_superpathway\_of\_5\_aminoimidazole\_ribonucleotide\_biosynthesis\_g\_Ruminococcus  
PWY\_6277\_\_superpathway\_of\_5\_aminoimidazole\_ribonucleotide\_biosynthesis\_g\_Ruminococcus  
PWY\_6277\_\_superpathway\_of\_5\_aminoimidazole\_ribonucleotide\_biosynthesis\_g\_Ruminococcus  
PWY\_6277\_\_superpathway\_of\_5\_aminoimidazole\_ribonucleotide\_biosynthesis\_g\_Slackia\_s\_Sla  
PWY\_6277\_\_superpathway\_of\_5\_aminoimidazole\_ribonucleotide\_biosynthesis\_g\_Solobacterium  
PWY\_6277\_\_superpathway\_of\_5\_aminoimidazole\_ribonucleotide\_biosynthesis\_g\_Streptococcus  
PWY\_6277\_\_superpathway\_of\_5\_aminoimidazole\_ribonucleotide\_biosynthesis\_g\_Subdoligranuli  
PWY\_6277\_\_superpathway\_of\_5\_aminoimidazole\_ribonucleotide\_biosynthesis\_g\_Veillonella\_s\_  
PWY\_6277\_\_superpathway\_of\_5\_aminoimidazole\_ribonucleotide\_biosynthesis\_g\_Veillonella\_s\_

PWY\_6282\_\_palmitoleate\_biosynthesis\_I\_(from\_(5Z)\_dodec\_5\_enoate)\_g\_\_Bacteroides\_s\_\_Bacte  
 PWY\_6282\_\_palmitoleate\_biosynthesis\_I\_(from\_(5Z)\_dodec\_5\_enoate)\_g\_\_Bacteroides\_s\_\_Bacte  
 PWY\_6282\_\_palmitoleate\_biosynthesis\_I\_(from\_(5Z)\_dodec\_5\_enoate)\_g\_\_Citrobacter\_s\_\_Citrob  
 PWY\_6282\_\_palmitoleate\_biosynthesis\_I\_(from\_(5Z)\_dodec\_5\_enoate)\_g\_\_Enterobacter\_s\_\_Ente  
 PWY\_6282\_\_palmitoleate\_biosynthesis\_I\_(from\_(5Z)\_dodec\_5\_enoate)\_g\_\_Haemophilus\_s\_\_Hae  
 PWY\_6282\_\_palmitoleate\_biosynthesis\_I\_(from\_(5Z)\_dodec\_5\_enoate)\_g\_\_Klebsiella\_s\_\_Klebsiel  
 PWY\_6285\_\_superpathway\_of\_fatty\_acids\_biosynthesis\_(E\_coli)\_unclassified  
 PWY\_6305\_\_putrescine\_biosynthesis\_IV\_g\_\_Blautia\_s\_\_Ruminococcus\_obeum  
 PWY\_6305\_\_putrescine\_biosynthesis\_IV\_g\_\_Citrobacter\_s\_\_Citrobacter\_freundii  
 PWY\_6305\_\_putrescine\_biosynthesis\_IV\_g\_\_Enterobacter\_s\_\_Enterobacter\_cloacae  
 PWY\_6305\_\_putrescine\_biosynthesis\_IV\_g\_\_Faecalibacterium\_s\_\_Faecalibacterium\_prausnitzii  
 PWY\_6305\_\_putrescine\_biosynthesis\_IV\_g\_\_Klebsiella\_s\_\_Klebsiella\_pneumoniae  
 PWY\_6305\_\_putrescine\_biosynthesis\_IV\_g\_\_Odoribacter\_s\_\_Odoribacter\_splanchnicus  
 PWY\_6305\_\_putrescine\_biosynthesis\_IV\_g\_\_Ruminococcus\_s\_\_Ruminococcus\_champanellensis  
 PWY\_6307\_\_L\_tryptophan\_degradation\_X\_(mammalian,\_via\_tryptamine)  
 PWY\_6313\_\_serotonin\_degradation  
 PWY\_6317\_\_galactose\_degradation\_I\_(Leloir\_pathway)\_g\_\_Anaerostipes\_s\_\_Anaerostipes\_hadru  
 PWY\_6317\_\_galactose\_degradation\_I\_(Leloir\_pathway)\_g\_\_Blautia\_s\_\_Blautia\_sp\_KLE\_1732  
 PWY\_6317\_\_galactose\_degradation\_I\_(Leloir\_pathway)\_g\_\_Blautia\_s\_\_Ruminococcus\_obeum  
 PWY\_6317\_\_galactose\_degradation\_I\_(Leloir\_pathway)\_g\_\_Citrobacter\_s\_\_Citrobacter\_freundii  
 PWY\_6317\_\_galactose\_degradation\_I\_(Leloir\_pathway)\_g\_\_Clostridium\_s\_\_Clostridium\_asparagif  
 PWY\_6317\_\_galactose\_degradation\_I\_(Leloir\_pathway)\_g\_\_Clostridium\_s\_\_Clostridium\_sp\_SS2\_1  
 PWY\_6317\_\_galactose\_degradation\_I\_(Leloir\_pathway)\_g\_\_Enterococcus\_s\_\_Enterococcus\_duran  
 PWY\_6317\_\_galactose\_degradation\_I\_(Leloir\_pathway)\_g\_\_Enterococcus\_s\_\_Enterococcus\_faeci  
 PWY\_6317\_\_galactose\_degradation\_I\_(Leloir\_pathway)\_g\_\_Eubacterium\_s\_\_Eubacterium\_siraur  
 PWY\_6317\_\_galactose\_degradation\_I\_(Leloir\_pathway)\_g\_\_Fusobacterium\_s\_\_Fusobacterium\_nu  
 PWY\_6317\_\_galactose\_degradation\_I\_(Leloir\_pathway)\_g\_\_Lachnospiraceae\_noname\_s\_\_Lachno:  
 PWY\_6317\_\_galactose\_degradation\_I\_(Leloir\_pathway)\_g\_\_Lachnospiraceae\_noname\_s\_\_Lachno:  
 PWY\_6317\_\_galactose\_degradation\_I\_(Leloir\_pathway)\_g\_\_Lactococcus\_s\_\_Lactococcus\_lactis  
 PWY\_6317\_\_galactose\_degradation\_I\_(Leloir\_pathway)\_g\_\_Ruminococcus\_s\_\_Ruminococcus\_sp  
 PWY\_6317\_\_galactose\_degradation\_I\_(Leloir\_pathway)\_g\_\_Streptococcus\_s\_\_Streptococcus\_para  
 PWY\_6317\_\_galactose\_degradation\_I\_(Leloir\_pathway)\_g\_\_Streptococcus\_s\_\_Streptococcus\_sang  
 PWY\_6385\_\_peptidoglycan\_biosynthesis\_III\_(mycobacteria)\_g\_\_Anaerofustis\_s\_\_Anaerofustis\_ste  
 PWY\_6385\_\_peptidoglycan\_biosynthesis\_III\_(mycobacteria)\_g\_\_Bacteroides\_s\_\_Bacteroides\_fine  
 PWY\_6385\_\_peptidoglycan\_biosynthesis\_III\_(mycobacteria)\_g\_\_Bacteroides\_s\_\_Bacteroides\_ovat  
 PWY\_6385\_\_peptidoglycan\_biosynthesis\_III\_(mycobacteria)\_g\_\_Bacteroides\_s\_\_Bacteroides\_sp\_1  
 PWY\_6385\_\_peptidoglycan\_biosynthesis\_III\_(mycobacteria)\_g\_\_Bacteroides\_s\_\_Bacteroides\_sp\_2  
 PWY\_6385\_\_peptidoglycan\_biosynthesis\_III\_(mycobacteria)\_g\_\_Bacteroides\_s\_\_Bacteroides\_sp\_3  
 PWY\_6385\_\_peptidoglycan\_biosynthesis\_III\_(mycobacteria)\_g\_\_Bacteroides\_s\_\_Bacteroides\_sp\_3  
 PWY\_6385\_\_peptidoglycan\_biosynthesis\_III\_(mycobacteria)\_g\_\_Bacteroides\_s\_\_Bacteroides\_sp\_4  
 PWY\_6385\_\_peptidoglycan\_biosynthesis\_III\_(mycobacteria)\_g\_\_Bacteroides\_s\_\_Bacteroides\_xyla  
 PWY\_6385\_\_peptidoglycan\_biosynthesis\_III\_(mycobacteria)\_g\_\_Bifidobacterium\_s\_\_Bifidobacteri  
 PWY\_6385\_\_peptidoglycan\_biosynthesis\_III\_(mycobacteria)\_g\_\_Citrobacter\_s\_\_Citrobacter\_freun  
 PWY\_6385\_\_peptidoglycan\_biosynthesis\_III\_(mycobacteria)\_g\_\_Clostridium\_s\_\_Clostridium\_perfr  
 PWY\_6385\_\_peptidoglycan\_biosynthesis\_III\_(mycobacteria)\_g\_\_Eggerthella\_s\_\_Eggerthella\_lenta  
 PWY\_6385\_\_peptidoglycan\_biosynthesis\_III\_(mycobacteria)\_g\_\_Eggerthella\_s\_\_Eggerthella\_sp\_1  
 PWY\_6385\_\_peptidoglycan\_biosynthesis\_III\_(mycobacteria)\_g\_\_Eggerthella\_s\_\_Eggerthella\_sp\_H











PWY\_6387\_\_UDP\_N\_acetylmuramoyl\_pentapeptide\_biosynthesis\_I\_(meso\_diaminopimelate\_conf)  
PWY\_6396\_\_superpathway\_of\_2,3\_butanediol\_biosynthesis\_unclassified  
PWY\_6435\_\_4\_hydroxybenzoate\_biosynthesis\_V  
PWY\_6435\_\_4\_hydroxybenzoate\_biosynthesis\_V\_unclassified  
PWY\_6471\_\_peptidoglycan\_biosynthesis\_IV\_(Enterococcus\_faecium)\_g\_Streptococcus\_s\_Streptococcus  
PWY\_6507\_\_4\_deoxy\_L\_threo\_hex\_4\_enuopyranuronate\_degradation\_g\_Citrobacter\_s\_Citrobacter  
PWY\_6507\_\_4\_deoxy\_L\_threo\_hex\_4\_enuopyranuronate\_degradation\_g\_Clostridiales\_noname\_s\_Clostridiales  
PWY\_6507\_\_4\_deoxy\_L\_threo\_hex\_4\_enuopyranuronate\_degradation\_g\_Enterobacter\_s\_Enterobacter  
PWY\_6507\_\_4\_deoxy\_L\_threo\_hex\_4\_enuopyranuronate\_degradation\_g\_Lactobacillus\_s\_Lactobacillus  
PWY\_6519\_\_8\_amino\_7\_oxononanoate\_biosynthesis\_I\_g\_Bacteroides\_s\_Bacteroides\_sp\_2\_2\_4  
PWY\_6519\_\_8\_amino\_7\_oxononanoate\_biosynthesis\_I\_g\_Bacteroides\_s\_Bacteroides\_xylanisolans  
PWY\_6519\_\_8\_amino\_7\_oxononanoate\_biosynthesis\_I\_g\_Citrobacter\_s\_Citrobacter\_freundii  
PWY\_6519\_\_8\_amino\_7\_oxononanoate\_biosynthesis\_I\_g\_Enterobacter\_s\_Enterobacter\_cloacae  
PWY\_6519\_\_8\_amino\_7\_oxononanoate\_biosynthesis\_I\_g\_Haemophilus\_s\_Haemophilus\_parainfluenzae  
PWY\_6519\_\_8\_amino\_7\_oxononanoate\_biosynthesis\_I\_g\_Klebsiella\_s\_Klebsiella\_pneumoniae  
PWY\_6527\_\_stachyose\_degradation\_g\_Blautia\_s\_Blautia\_sp\_KLE\_1732  
PWY\_6527\_\_stachyose\_degradation\_g\_Citrobacter\_s\_Citrobacter\_freundii  
PWY\_6527\_\_stachyose\_degradation\_g\_Coprococcus\_s\_Coprococcus\_eutactus  
PWY\_6527\_\_stachyose\_degradation\_g\_Coprococcus\_s\_Coprococcus\_sp\_ART55\_1  
PWY\_6527\_\_stachyose\_degradation\_g\_Eubacterium\_s\_Eubacterium\_siraeum  
PWY\_6527\_\_stachyose\_degradation\_g\_Lachnospiraceae\_noname\_s\_Lachnospiraceae\_bacterium  
PWY\_6527\_\_stachyose\_degradation\_g\_Lactobacillus\_s\_Lactobacillus\_casei\_paracasei  
PWY\_6527\_\_stachyose\_degradation\_g\_Lactobacillus\_s\_Lactobacillus\_rhamnosus  
PWY\_6527\_\_stachyose\_degradation\_g\_Roseburia\_s\_Roseburia\_intestinalis  
PWY\_6527\_\_stachyose\_degradation\_g\_Ruminococcus\_s\_Ruminococcus\_sp  
PWY\_6527\_\_stachyose\_degradation\_g\_Streptococcus\_s\_Streptococcus\_parasanguinis  
PWY\_6531\_\_mannitol\_cycle\_g\_Escherichia\_s\_Escherichia\_coli  
PWY\_6531\_\_mannitol\_cycle\_unclassified  
PWY\_6545\_\_pyrimidine\_deoxyribonucleotides\_de\_novo\_biosynthesis\_III\_g\_Eggerthella\_s\_Eggerthella  
PWY\_6545\_\_pyrimidine\_deoxyribonucleotides\_de\_novo\_biosynthesis\_III\_g\_Eggerthella\_s\_Eggerthella  
PWY\_6545\_\_pyrimidine\_deoxyribonucleotides\_de\_novo\_biosynthesis\_III\_g\_Eggerthella\_s\_Eggerthella  
PWY\_6545\_\_pyrimidine\_deoxyribonucleotides\_de\_novo\_biosynthesis\_III\_g\_Haemophilus\_s\_Haemophilus  
PWY\_6545\_\_pyrimidine\_deoxyribonucleotides\_de\_novo\_biosynthesis\_III\_g\_Slackia\_s\_Slackia\_pneumoniae  
PWY\_6588\_\_pyruvate\_fermentation\_to\_acetone\_g\_Anaerostipes\_s\_Anaerostipes\_hadrus  
PWY\_6588\_\_pyruvate\_fermentation\_to\_acetone\_g\_Clostridium\_s\_Clostridium\_sp\_SS2\_1  
PWY\_6588\_\_pyruvate\_fermentation\_to\_acetone\_g\_Lachnospiraceae\_noname\_s\_Lachnospiraceae  
PWY\_6590\_\_superpathway\_of\_Clostridium\_acetobutylicum\_acidogenic\_fermentation\_unclassified  
PWY\_6595\_\_superpathway\_of\_guanosine\_nucleotides\_degradation\_(plants)\_g\_Blautia\_s\_Ruminococcus

PWY\_6606\_guanosine\_nucleotides\_degradation\_II\_g\_Blautia\_s\_Ruminococcus\_obeum  
PWY\_6608\_guanosine\_nucleotides\_degradation\_III\_g\_Blautia\_s\_Ruminococcus\_obeum  
PWY\_6608\_guanosine\_nucleotides\_degradation\_III\_g\_Coprococcus\_s\_Coprococcus\_catus  
PWY\_6608\_guanosine\_nucleotides\_degradation\_III\_g\_Klebsiella\_s\_Klebsiella\_pneumoniae  
PWY\_6608\_guanosine\_nucleotides\_degradation\_III\_g\_Odoribacter\_s\_Odoribacter\_splanchnicu  
PWY\_6608\_guanosine\_nucleotides\_degradation\_III\_g\_Parabacteroides\_s\_Parabacteroides\_joh  
PWY\_6609\_adenine\_and\_adenosine\_salvage\_III\_g\_Alistipes\_s\_Alistipes\_senegalensis  
PWY\_6609\_adenine\_and\_adenosine\_salvage\_III\_g\_Alistipes\_s\_Alistipes\_shahii  
PWY\_6609\_adenine\_and\_adenosine\_salvage\_III\_g\_Anaerofustis\_s\_Anaerofustis\_stercorihomii  
PWY\_6609\_adenine\_and\_adenosine\_salvage\_III\_g\_Anaerotruncus\_s\_Anaerotruncus\_colihomii  
PWY\_6609\_adenine\_and\_adenosine\_salvage\_III\_g\_Bacteroides\_s\_Bacteroides\_faecis  
PWY\_6609\_adenine\_and\_adenosine\_salvage\_III\_g\_Bacteroides\_s\_Bacteroides\_finegoldii  
PWY\_6609\_adenine\_and\_adenosine\_salvage\_III\_g\_Bacteroides\_s\_Bacteroides\_ovatus  
PWY\_6609\_adenine\_and\_adenosine\_salvage\_III\_g\_Bacteroides\_s\_Bacteroides\_sp\_1\_1\_30  
PWY\_6609\_adenine\_and\_adenosine\_salvage\_III\_g\_Bacteroides\_s\_Bacteroides\_sp\_1\_1\_6  
PWY\_6609\_adenine\_and\_adenosine\_salvage\_III\_g\_Bacteroides\_s\_Bacteroides\_sp\_2\_1\_22  
PWY\_6609\_adenine\_and\_adenosine\_salvage\_III\_g\_Bacteroides\_s\_Bacteroides\_sp\_2\_2\_4  
PWY\_6609\_adenine\_and\_adenosine\_salvage\_III\_g\_Bacteroides\_s\_Bacteroides\_sp\_3\_1\_23  
PWY\_6609\_adenine\_and\_adenosine\_salvage\_III\_g\_Bacteroides\_s\_Bacteroides\_thetaiotaomicr  
PWY\_6609\_adenine\_and\_adenosine\_salvage\_III\_g\_Bacteroides\_s\_Bacteroides\_xylanisolvens  
PWY\_6609\_adenine\_and\_adenosine\_salvage\_III\_g\_Blautia\_s\_Blautia\_sp\_KLE\_1732  
PWY\_6609\_adenine\_and\_adenosine\_salvage\_III\_g\_Blautia\_s\_Ruminococcus\_gnavus  
PWY\_6609\_adenine\_and\_adenosine\_salvage\_III\_g\_Citrobacter\_s\_Citrobacter\_freundii  
PWY\_6609\_adenine\_and\_adenosine\_salvage\_III\_g\_Clostridiales\_noname\_s\_Clostridiales\_bact  
PWY\_6609\_adenine\_and\_adenosine\_salvage\_III\_g\_Clostridium\_s\_Clostridium\_asparagiforme  
PWY\_6609\_adenine\_and\_adenosine\_salvage\_III\_g\_Clostridium\_s\_Clostridium\_perfringens  
PWY\_6609\_adenine\_and\_adenosine\_salvage\_III\_g\_Collinsella\_s\_Collinsella\_intestinalis  
PWY\_6609\_adenine\_and\_adenosine\_salvage\_III\_g\_Coprococcus\_s\_Coprococcus\_catus  
PWY\_6609\_adenine\_and\_adenosine\_salvage\_III\_g\_Eggerthella\_s\_Eggerthella\_lenta  
PWY\_6609\_adenine\_and\_adenosine\_salvage\_III\_g\_Eggerthella\_s\_Eggerthella\_sp\_1\_3\_56FAA  
PWY\_6609\_adenine\_and\_adenosine\_salvage\_III\_g\_Eggerthella\_s\_Eggerthella\_sp\_HGA1  
PWY\_6609\_adenine\_and\_adenosine\_salvage\_III\_g\_Enterobacter\_s\_Enterobacter\_cloacae  
PWY\_6609\_adenine\_and\_adenosine\_salvage\_III\_g\_Erysipelotrichaceae\_noname\_s\_Clostridium  
PWY\_6609\_adenine\_and\_adenosine\_salvage\_III\_g\_Erysipelotrichaceae\_noname\_s\_Eubacteriu  
PWY\_6609\_adenine\_and\_adenosine\_salvage\_III\_g\_Erysipelotrichaceae\_noname\_s\_Eubacteriu  
PWY\_6609\_adenine\_and\_adenosine\_salvage\_III\_g\_Holdemania\_s\_Holdemania\_filiformis  
PWY\_6609\_adenine\_and\_adenosine\_salvage\_III\_g\_Klebsiella\_s\_Klebsiella\_pneumoniae  
PWY\_6609\_adenine\_and\_adenosine\_salvage\_III\_g\_Lachnospiraceae\_noname\_s\_Lachnospirace  
PWY\_6609\_adenine\_and\_adenosine\_salvage\_III\_g\_Lachnospiraceae\_noname\_s\_Lachnospirace  
PWY\_6609\_adenine\_and\_adenosine\_salvage\_III\_g\_Lactobacillus\_s\_Lactobacillus\_casei\_paraca  
PWY\_6609\_adenine\_and\_adenosine\_salvage\_III\_g\_Odoribacter\_s\_Odoribacter\_splanchnicus  
PWY\_6609\_adenine\_and\_adenosine\_salvage\_III\_g\_Pediococcus\_s\_Pediococcus\_acidilactici  
PWY\_6609\_adenine\_and\_adenosine\_salvage\_III\_g\_Ruminococcus\_s\_Ruminococcus\_champane  
PWY\_6609\_adenine\_and\_adenosine\_salvage\_III\_g\_Streptococcus\_s\_Streptococcus\_australis  
PWY\_6609\_adenine\_and\_adenosine\_salvage\_III\_g\_Streptococcus\_s\_Streptococcus\_mitis\_orali  
PWY\_6609\_adenine\_and\_adenosine\_salvage\_III\_g\_Streptococcus\_s\_Streptococcus\_sanguinis  
PWY\_6612\_superpathway\_of\_tetrahydrofolate\_biosynthesis\_g\_Lactococcus\_s\_Lactococcus\_lac

PWY\_6628\_\_superpathway\_of\_L\_phenylalanine\_biosynthesis\_g\_Citrobacter\_s\_Citrobacter\_freundii

PWY\_6628\_\_superpathway\_of\_L\_phenylalanine\_biosynthesis\_g\_Klebsiella\_s\_Klebsiella\_pneumoniae

PWY\_6628\_\_superpathway\_of\_L\_phenylalanine\_biosynthesis\_g\_Propionibacterium\_s\_Propionibacterium

PWY\_6629\_\_superpathway\_of\_L\_tryptophan\_biosynthesis\_g\_Citrobacter\_s\_Citrobacter\_freundii

PWY\_6629\_\_superpathway\_of\_L\_tryptophan\_biosynthesis\_unclassified

PWY\_6630\_\_superpathway\_of\_L\_tyrosine\_biosynthesis\_g\_Citrobacter\_s\_Citrobacter\_freundii

PWY\_6630\_\_superpathway\_of\_L\_tyrosine\_biosynthesis\_g\_Klebsiella\_s\_Klebsiella\_pneumoniae

PWY\_6630\_\_superpathway\_of\_L\_tyrosine\_biosynthesis\_g\_Propionibacterium\_s\_Propionibacterium

PWY\_6690\_\_cinnamate\_and\_3\_hydroxycinnamate\_degradation\_to\_2\_oxopent\_4\_enoate\_g\_Citrobacter\_s\_Citrobacter\_freundii

PWY\_6690\_\_cinnamate\_and\_3\_hydroxycinnamate\_degradation\_to\_2\_oxopent\_4\_enoate\_g\_Klebsiella\_s\_Klebsiella\_pneumoniae

PWY\_6700\_\_queuosine\_biosynthesis\_g\_Adlercreutzia\_s\_Adlercreutzia\_equolifaciens

PWY\_6700\_\_queuosine\_biosynthesis\_g\_Akkermansia\_s\_Akkermansia\_muciniphila

PWY\_6700\_\_queuosine\_biosynthesis\_g>Anaerostipes\_s>Anaerostipes\_hadrus

PWY\_6700\_\_queuosine\_biosynthesis\_g\_Bacteroides\_s\_Bacteroides\_cellulosilyticus

PWY\_6700\_\_queuosine\_biosynthesis\_g\_Bacteroides\_s\_Bacteroides\_coprocola

PWY\_6700\_\_queuosine\_biosynthesis\_g\_Bacteroides\_s\_Bacteroides\_dorei

PWY\_6700\_\_queuosine\_biosynthesis\_g\_Bacteroides\_s\_Bacteroides\_eggerthii

PWY\_6700\_\_queuosine\_biosynthesis\_g\_Bacteroides\_s\_Bacteroides\_faecis

PWY\_6700\_\_queuosine\_biosynthesis\_g\_Bacteroides\_s\_Bacteroides\_finegoldii

PWY\_6700\_\_queuosine\_biosynthesis\_g\_Bacteroides\_s\_Bacteroides\_fragilis

PWY\_6700\_\_queuosine\_biosynthesis\_g\_Bacteroides\_s\_Bacteroides\_massiliensis

PWY\_6700\_\_queuosine\_biosynthesis\_g\_Bacteroides\_s\_Bacteroides\_ovatus

PWY\_6700\_\_queuosine\_biosynthesis\_g\_Bacteroides\_s\_Bacteroides\_plebeius

PWY\_6700\_\_queuosine\_biosynthesis\_g\_Bacteroides\_s\_Bacteroides\_sp\_1\_1\_30

PWY\_6700\_\_queuosine\_biosynthesis\_g\_Bacteroides\_s\_Bacteroides\_sp\_1\_1\_6

PWY\_6700\_\_queuosine\_biosynthesis\_g\_Bacteroides\_s\_Bacteroides\_sp\_2\_1\_22

PWY\_6700\_\_queuosine\_biosynthesis\_g\_Bacteroides\_s\_Bacteroides\_sp\_2\_2\_4

PWY\_6700\_\_queuosine\_biosynthesis\_g\_Bacteroides\_s\_Bacteroides\_sp\_3\_1\_19

PWY\_6700\_\_queuosine\_biosynthesis\_g\_Bacteroides\_s\_Bacteroides\_sp\_3\_1\_23

PWY\_6700\_\_queuosine\_biosynthesis\_g\_Bacteroides\_s\_Bacteroides\_sp\_3\_1\_33FAA

PWY\_6700\_\_queuosine\_biosynthesis\_g\_Bacteroides\_s\_Bacteroides\_sp\_3\_1\_40A

PWY\_6700\_\_queuosine\_biosynthesis\_g\_Bacteroides\_s\_Bacteroides\_sp\_4\_3\_47FAA

PWY\_6700\_\_queuosine\_biosynthesis\_g\_Bacteroides\_s\_Bacteroides\_sp\_9\_1\_42FAA

PWY\_6700\_\_queuosine\_biosynthesis\_g\_Bacteroides\_s\_Bacteroides\_sp\_D20

PWY\_6700\_\_queuosine\_biosynthesis\_g\_Bacteroides\_s\_Bacteroides\_stercoris

PWY\_6700\_\_queuosine\_biosynthesis\_g\_Bacteroides\_s\_Bacteroides\_thetaiotaomicron

PWY\_6700\_\_queuosine\_biosynthesis\_g\_Bacteroides\_s\_Bacteroides\_uniformis

PWY\_6700\_\_queuosine\_biosynthesis\_g\_Bacteroides\_s\_Bacteroides\_xylanisolvans

PWY\_6700\_\_queuosine\_biosynthesis\_g\_Barnesiella\_s\_Barnesiella\_intestinihominis

PWY\_6700\_\_queuosine\_biosynthesis\_g\_Bilophila\_s\_Bilophila\_wadsworthia

PWY\_6700\_\_queuosine\_biosynthesis\_g\_Blautia\_s\_Blautia\_hydrogenotrophica

PWY\_6700\_\_queuosine\_biosynthesis\_g\_Blautia\_s\_Blautia\_sp\_KLE\_1732

PWY\_6700\_\_queuosine\_biosynthesis\_g\_Blautia\_s\_Ruminococcus\_torques

PWY\_6700\_\_queuosine\_biosynthesis\_g\_Burkholderiales\_noname\_s\_Burkholderiales\_bacterium

PWY\_6700\_\_queuosine\_biosynthesis\_g\_Butyrvibrio\_s\_Butyrvibrio\_crossotus

PWY\_6700\_\_queuosine\_biosynthesis\_g\_Citrobacter\_s\_Citrobacter\_freundii

PWY\_6700\_\_queuosine\_biosynthesis\_g\_Clostridium\_s\_Clostridium\_sp\_L2\_50

|                                                                                          |
|------------------------------------------------------------------------------------------|
| PWY_6700__queuosine_biosynthesis_g__Clostridium_s__Clostridium_sp_SS2_1                  |
| PWY_6700__queuosine_biosynthesis_g__Copro bacter_s__Copro bacter_fastidiosus             |
| PWY_6700__queuosine_biosynthesis_g__Copro coccus_s__Copro coccus_catus                   |
| PWY_6700__queuosine_biosynthesis_g__Copro coccus_s__Copro coccus_eutactus                |
| PWY_6700__queuosine_biosynthesis_g__Copro coccus_s__Copro coccus_sp_ART55_1              |
| PWY_6700__queuosine_biosynthesis_g__Dialister_s__Dialister_invisus                       |
| PWY_6700__queuosine_biosynthesis_g__Enterobacter_s__Enterobacter_cloacae                 |
| PWY_6700__queuosine_biosynthesis_g__Enterococcus_s__Enterococcus_faecalis                |
| PWY_6700__queuosine_biosynthesis_g__Enterococcus_s__Enterococcus_faecium                 |
| PWY_6700__queuosine_biosynthesis_g__Enterorhabdus_s__Enterorhabdus_caecimuris            |
| PWY_6700__queuosine_biosynthesis_g__Eubacterium_s__Eubacterium_hallii                    |
| PWY_6700__queuosine_biosynthesis_g__Klebsiella_s__Klebsiella_pneumoniae                  |
| PWY_6700__queuosine_biosynthesis_g__Lachnospiraceae_noname_s__Lachnospiraceae_bacteriu   |
| PWY_6700__queuosine_biosynthesis_g__Megasphaera_s__Megasphaera_micronuciformis           |
| PWY_6700__queuosine_biosynthesis_g__Odoribacter_s__Odoribacter_laneus                    |
| PWY_6700__queuosine_biosynthesis_g__Odoribacter_s__Odoribacter_splanchnicus              |
| PWY_6700__queuosine_biosynthesis_g__Oxalobacter_s__Oxalobacter_formigenes                |
| PWY_6700__queuosine_biosynthesis_g__Parabacteroides_s__Parabacteroides_distasonis        |
| PWY_6700__queuosine_biosynthesis_g__Parabacteroides_s__Parabacteroides_johnsonii         |
| PWY_6700__queuosine_biosynthesis_g__Parabacteroides_s__Parabacteroides_sp_20_3           |
| PWY_6700__queuosine_biosynthesis_g__Parabacteroides_s__Parabacteroides_sp_D13            |
| PWY_6700__queuosine_biosynthesis_g__Paraprevotella_s__Paraprevotella_clara               |
| PWY_6700__queuosine_biosynthesis_g__Parasutterella_s__Parasutterella_excrementihominis   |
| PWY_6700__queuosine_biosynthesis_g__Peptostreptococcaceae_noname_s__Clostridium_bartlet  |
| PWY_6700__queuosine_biosynthesis_g__Phascolarctobacterium_s__Phascolarctobacterium_succi |
| PWY_6700__queuosine_biosynthesis_g__Prevotella_s__Prevotella_copri                       |
| PWY_6700__queuosine_biosynthesis_g__Ruminococcus_s__Ruminococcus_callidus                |
| PWY_6700__queuosine_biosynthesis_g__Ruminococcus_s__Ruminococcus_sp                      |
| PWY_6700__queuosine_biosynthesis_g__Streptococcus_s__Streptococcus_mitis_oralis_pneumoni |
| PWY_6700__queuosine_biosynthesis_g__Veillonella_s__Veillonella_dispar                    |
| PWY_6700__queuosine_biosynthesis_g__Veillonella_s__Veillonella_parvula                   |
| PWY_6703__preQO_biosynthesis_g__Adlercreutzia_s__Adlercreutzia_equolifaciens             |
| PWY_6703__preQO_biosynthesis_g__Akkermansia_s__Akkermansia_muciniphila                   |
| PWY_6703__preQO_biosynthesis_g__Alistipes_s__Alistipes_putredinis                        |
| PWY_6703__preQO_biosynthesis_g__Anaerostipes_s__Anaerostipes_hadrus                      |
| PWY_6703__preQO_biosynthesis_g__Bacteroides_s__Bacteroides_cellulosilyticus              |
| PWY_6703__preQO_biosynthesis_g__Bacteroides_s__Bacteroides_clarus                        |
| PWY_6703__preQO_biosynthesis_g__Bacteroides_s__Bacteroides_dorei                         |
| PWY_6703__preQO_biosynthesis_g__Bacteroides_s__Bacteroides_eggerthii                     |
| PWY_6703__preQO_biosynthesis_g__Bacteroides_s__Bacteroides_faecis                        |
| PWY_6703__preQO_biosynthesis_g__Bacteroides_s__Bacteroides_fragilis                      |
| PWY_6703__preQO_biosynthesis_g__Bacteroides_s__Bacteroides_massiliensis                  |
| PWY_6703__preQO_biosynthesis_g__Bacteroides_s__Bacteroides_ovatus                        |
| PWY_6703__preQO_biosynthesis_g__Bacteroides_s__Bacteroides_plebeius                      |
| PWY_6703__preQO_biosynthesis_g__Bacteroides_s__Bacteroides_sp_1_1_30                     |
| PWY_6703__preQO_biosynthesis_g__Bacteroides_s__Bacteroides_sp_1_1_6                      |
| PWY_6703__preQO_biosynthesis_g__Bacteroides_s__Bacteroides_sp_2_1_22                     |

PWY\_6703\_\_preQ0\_biosynthesis\_g\_\_Bacteroides\_s\_\_Bacteroides\_sp\_2\_2\_4  
PWY\_6703\_\_preQ0\_biosynthesis\_g\_\_Bacteroides\_s\_\_Bacteroides\_sp\_3\_1\_19  
PWY\_6703\_\_preQ0\_biosynthesis\_g\_\_Bacteroides\_s\_\_Bacteroides\_sp\_3\_1\_23  
PWY\_6703\_\_preQ0\_biosynthesis\_g\_\_Bacteroides\_s\_\_Bacteroides\_sp\_3\_1\_33FAA  
PWY\_6703\_\_preQ0\_biosynthesis\_g\_\_Bacteroides\_s\_\_Bacteroides\_sp\_3\_1\_40A  
PWY\_6703\_\_preQ0\_biosynthesis\_g\_\_Bacteroides\_s\_\_Bacteroides\_sp\_4\_3\_47FAA  
PWY\_6703\_\_preQ0\_biosynthesis\_g\_\_Bacteroides\_s\_\_Bacteroides\_sp\_9\_1\_42FAA  
PWY\_6703\_\_preQ0\_biosynthesis\_g\_\_Bacteroides\_s\_\_Bacteroides\_sp\_D20  
PWY\_6703\_\_preQ0\_biosynthesis\_g\_\_Bacteroides\_s\_\_Bacteroides\_stercoris  
PWY\_6703\_\_preQ0\_biosynthesis\_g\_\_Bacteroides\_s\_\_Bacteroides\_thetaiotaomicron  
PWY\_6703\_\_preQ0\_biosynthesis\_g\_\_Bacteroides\_s\_\_Bacteroides\_uniformis  
PWY\_6703\_\_preQ0\_biosynthesis\_g\_\_Bacteroides\_s\_\_Bacteroides\_xylanisolvens  
PWY\_6703\_\_preQ0\_biosynthesis\_g\_\_Barnesiella\_s\_\_Barnesiella\_intestinihominis  
PWY\_6703\_\_preQ0\_biosynthesis\_g\_\_Bilophila\_s\_\_Bilophila\_wadsworthia  
PWY\_6703\_\_preQ0\_biosynthesis\_g\_\_Blautia\_s\_\_Blautia\_sp\_KLE\_1732  
PWY\_6703\_\_preQ0\_biosynthesis\_g\_\_Butyrivibrio\_s\_\_Butyrivibrio\_crossotus  
PWY\_6703\_\_preQ0\_biosynthesis\_g\_\_Citrobacter\_s\_\_Citrobacter\_freundii  
PWY\_6703\_\_preQ0\_biosynthesis\_g\_\_Clostridium\_s\_\_Clostridium\_sp\_L2\_50  
PWY\_6703\_\_preQ0\_biosynthesis\_g\_\_Clostridium\_s\_\_Clostridium\_sp\_SS2\_1  
PWY\_6703\_\_preQ0\_biosynthesis\_g\_\_Copro bacter\_s\_\_Copro bacter\_fastidiosus  
PWY\_6703\_\_preQ0\_biosynthesis\_g\_\_Copro coccus\_s\_\_Copro coccus\_catus  
PWY\_6703\_\_preQ0\_biosynthesis\_g\_\_Copro coccus\_s\_\_Copro coccus\_eutactus  
PWY\_6703\_\_preQ0\_biosynthesis\_g\_\_Dialister\_s\_\_Dialister\_invisus  
PWY\_6703\_\_preQ0\_biosynthesis\_g\_\_Enterobacter\_s\_\_Enterobacter\_cloacae  
PWY\_6703\_\_preQ0\_biosynthesis\_g\_\_Eubacterium\_s\_\_Eubacterium\_hallii  
PWY\_6703\_\_preQ0\_biosynthesis\_g\_\_Eubacterium\_s\_\_Eubacterium\_ramulus  
PWY\_6703\_\_preQ0\_biosynthesis\_g\_\_Klebsiella\_s\_\_Klebsiella\_pneumoniae  
PWY\_6703\_\_preQ0\_biosynthesis\_g\_\_Lachnospiraceae\_noname\_s\_\_Lachnospiraceae\_bacterium\_5  
PWY\_6703\_\_preQ0\_biosynthesis\_g\_\_Odoribacter\_s\_\_Odoribacter\_laneus  
PWY\_6703\_\_preQ0\_biosynthesis\_g\_\_Odoribacter\_s\_\_Odoribacter\_splanchnicus  
PWY\_6703\_\_preQ0\_biosynthesis\_g\_\_Parabacteroides\_s\_\_Parabacteroides\_distasonis  
PWY\_6703\_\_preQ0\_biosynthesis\_g\_\_Parabacteroides\_s\_\_Parabacteroides\_merdae  
PWY\_6703\_\_preQ0\_biosynthesis\_g\_\_Parabacteroides\_s\_\_Parabacteroides\_sp\_20\_3  
PWY\_6703\_\_preQ0\_biosynthesis\_g\_\_Parabacteroides\_s\_\_Parabacteroides\_sp\_D13  
PWY\_6703\_\_preQ0\_biosynthesis\_g\_\_Peptostreptococcaceae\_noname\_s\_\_Clostridium\_bartlettii  
PWY\_6703\_\_preQ0\_biosynthesis\_g\_\_Ruminococcus\_s\_\_Ruminococcus\_callidus  
PWY\_6703\_\_preQ0\_biosynthesis\_g\_\_Ruminococcus\_s\_\_Ruminococcus\_lactaris  
PWY\_6703\_\_preQ0\_biosynthesis\_g\_\_Streptococcus\_s\_\_Streptococcus\_mitis\_oralis\_pneumoniae  
PWY\_6703\_\_preQ0\_biosynthesis\_g\_\_Veillonella\_s\_\_Veillonella\_dispar  
PWY\_6703\_\_preQ0\_biosynthesis\_g\_\_Veillonella\_s\_\_Veillonella\_parvula  
PWY\_6708\_\_ubiquinol\_8\_biosynthesis\_(prokaryotic)\_g\_\_Citrobacter\_s\_\_Citrobacter\_freundii  
PWY\_6708\_\_ubiquinol\_8\_biosynthesis\_(prokaryotic)\_g\_\_Enterobacter\_s\_\_Enterobacter\_cloacae  
PWY\_6708\_\_ubiquinol\_8\_biosynthesis\_(prokaryotic)\_g\_\_Klebsiella\_s\_\_Klebsiella\_pneumoniae  
PWY\_6708\_\_ubiquinol\_8\_biosynthesis\_(prokaryotic)\_unclassified  
PWY\_6737\_\_starch\_degradation\_V\_g\_\_Akkermansia\_s\_\_Akkermansia\_muciniphila  
PWY\_6737\_\_starch\_degradation\_V\_g\_\_Alistipes\_s\_\_Alistipes\_finegoldii  
PWY\_6737\_\_starch\_degradation\_V\_g\_\_Alistipes\_s\_\_Alistipes\_sp\_HGB5

PWY\_6737\_\_starch\_degradation\_V\_g\_\_Anaerostipes\_s\_\_Anaerostipes\_hadrus  
PWY\_6737\_\_starch\_degradation\_V\_g\_\_Anaerotruncus\_s\_\_Anaerotruncus\_colihominis  
PWY\_6737\_\_starch\_degradation\_V\_g\_\_Bifidobacterium\_s\_\_Bifidobacterium\_dentium  
PWY\_6737\_\_starch\_degradation\_V\_g\_\_Blautia\_s\_\_Blautia\_sp\_KLE\_1732  
PWY\_6737\_\_starch\_degradation\_V\_g\_\_Blautia\_s\_\_Ruminococcus\_gnavus  
PWY\_6737\_\_starch\_degradation\_V\_g\_\_Blautia\_s\_\_Ruminococcus\_obeum  
PWY\_6737\_\_starch\_degradation\_V\_g\_\_Butyrivibrio\_s\_\_Butyrivibrio\_crossotus  
PWY\_6737\_\_starch\_degradation\_V\_g\_\_Catenibacterium\_s\_\_Catenibacterium\_mitsuokai  
PWY\_6737\_\_starch\_degradation\_V\_g\_\_Clostridiales\_noname\_s\_\_Clostridiales\_bacterium\_1\_7\_47  
PWY\_6737\_\_starch\_degradation\_V\_g\_\_Clostridium\_s\_\_Clostridium\_asparagiforme  
PWY\_6737\_\_starch\_degradation\_V\_g\_\_Clostridium\_s\_\_Clostridium\_bolteae  
PWY\_6737\_\_starch\_degradation\_V\_g\_\_Clostridium\_s\_\_Clostridium\_citroniae  
PWY\_6737\_\_starch\_degradation\_V\_g\_\_Clostridium\_s\_\_Clostridium\_clostridioforme  
PWY\_6737\_\_starch\_degradation\_V\_g\_\_Clostridium\_s\_\_Clostridium\_hathewayi  
PWY\_6737\_\_starch\_degradation\_V\_g\_\_Clostridium\_s\_\_Clostridium\_leptum  
PWY\_6737\_\_starch\_degradation\_V\_g\_\_Clostridium\_s\_\_Clostridium\_perfringens  
PWY\_6737\_\_starch\_degradation\_V\_g\_\_Clostridium\_s\_\_Clostridium\_sp\_SS2\_1  
PWY\_6737\_\_starch\_degradation\_V\_g\_\_Clostridium\_s\_\_Clostridium\_symbiosum  
PWY\_6737\_\_starch\_degradation\_V\_g\_\_Coprococcus\_s\_\_Coprococcus\_catus  
PWY\_6737\_\_starch\_degradation\_V\_g\_\_Dorea\_s\_\_Dorea\_formicigenerans  
PWY\_6737\_\_starch\_degradation\_V\_g\_\_Erysipelotrichaceae\_noname\_s\_\_Eubacterium\_biforme  
PWY\_6737\_\_starch\_degradation\_V\_g\_\_Eubacterium\_s\_\_Eubacterium\_hallii  
PWY\_6737\_\_starch\_degradation\_V\_g\_\_Eubacterium\_s\_\_Eubacterium\_ramulus  
PWY\_6737\_\_starch\_degradation\_V\_g\_\_Eubacterium\_s\_\_Eubacterium\_siraeum  
PWY\_6737\_\_starch\_degradation\_V\_g\_\_Eubacterium\_s\_\_Eubacterium\_ventriosum  
PWY\_6737\_\_starch\_degradation\_V\_g\_\_Fusobacterium\_s\_\_Fusobacterium\_nucleatum  
PWY\_6737\_\_starch\_degradation\_V\_g\_\_Lachnospiraceae\_noname\_s\_\_Lachnospiraceae\_bacterium  
PWY\_6737\_\_starch\_degradation\_V\_g\_\_Lachnospiraceae\_noname\_s\_\_Lachnospiraceae\_bacterium  
PWY\_6737\_\_starch\_degradation\_V\_g\_\_Lachnospiraceae\_noname\_s\_\_Lachnospiraceae\_bacterium  
PWY\_6737\_\_starch\_degradation\_V\_g\_\_Lachnospiraceae\_noname\_s\_\_Lachnospiraceae\_bacterium  
PWY\_6737\_\_starch\_degradation\_V\_g\_\_Lachnospiraceae\_noname\_s\_\_Lachnospiraceae\_bacterium  
PWY\_6737\_\_starch\_degradation\_V\_g\_\_Lachnospiraceae\_noname\_s\_\_Lachnospiraceae\_bacterium  
PWY\_6737\_\_starch\_degradation\_V\_g\_\_Lachnospiraceae\_noname\_s\_\_Lachnospiraceae\_bacterium  
PWY\_6737\_\_starch\_degradation\_V\_g\_\_Roseburia\_s\_\_Roseburia\_hominis  
PWY\_6737\_\_starch\_degradation\_V\_g\_\_Roseburia\_s\_\_Roseburia\_inulinivorans  
PWY\_6737\_\_starch\_degradation\_V\_g\_\_Ruminococcaceae\_noname\_s\_\_Ruminococcaceae\_bacterium  
PWY\_6737\_\_starch\_degradation\_V\_g\_\_Ruminococcus\_s\_\_Ruminococcus\_sp  
PWY\_6737\_\_starch\_degradation\_V\_g\_\_Streptococcus\_s\_\_Streptococcus\_australis  
PWY\_6737\_\_starch\_degradation\_V\_g\_\_Streptococcus\_s\_\_Streptococcus\_sanguinis  
PWY\_6737\_\_starch\_degradation\_V\_g\_\_Subdoligranulum\_s\_\_Subdoligranulum\_sp\_4\_3\_54A2FAA  
PWY\_6785\_\_hydrogen\_production\_VIII  
PWY\_6785\_\_hydrogen\_production\_VIII\_unclassified  
PWY\_6803\_\_phosphatidylcholine\_acyl\_editing\_g\_\_Citrobacter\_s\_\_Citrobacter\_freundii  
PWY\_6803\_\_phosphatidylcholine\_acyl\_editing\_g\_\_Enterobacter\_s\_\_Enterobacter\_cloacae  
PWY\_6803\_\_phosphatidylcholine\_acyl\_editing\_g\_\_Klebsiella\_s\_\_Klebsiella\_pneumoniae  
PWY\_6823\_\_molybdenum\_cofactor\_biosynthesis\_g\_\_Citrobacter\_s\_\_Citrobacter\_freundii  
PWY\_6823\_\_molybdenum\_cofactor\_biosynthesis\_unclassified







PWY\_7111\_\_pyruvate\_fermentation\_to\_isobutanol\_(engineered)\_g\_\_Klebsiella\_s\_\_Klebsiella\_pne  
PWY\_7111\_\_pyruvate\_fermentation\_to\_isobutanol\_(engineered)\_g\_\_Lachnospiraceae\_noname\_s  
PWY\_7111\_\_pyruvate\_fermentation\_to\_isobutanol\_(engineered)\_g\_\_Lachnospiraceae\_noname\_s  
PWY\_7111\_\_pyruvate\_fermentation\_to\_isobutanol\_(engineered)\_g\_\_Lachnospiraceae\_noname\_s  
PWY\_7111\_\_pyruvate\_fermentation\_to\_isobutanol\_(engineered)\_g\_\_Lachnospiraceae\_noname\_s  
PWY\_7111\_\_pyruvate\_fermentation\_to\_isobutanol\_(engineered)\_g\_\_Lachnospiraceae\_noname\_s  
PWY\_7111\_\_pyruvate\_fermentation\_to\_isobutanol\_(engineered)\_g\_\_Lachnospiraceae\_noname\_s  
PWY\_7111\_\_pyruvate\_fermentation\_to\_isobutanol\_(engineered)\_g\_\_Lachnospiraceae\_noname\_s  
PWY\_7111\_\_pyruvate\_fermentation\_to\_isobutanol\_(engineered)\_g\_\_Odoribacter\_s\_\_Odoribacter  
PWY\_7111\_\_pyruvate\_fermentation\_to\_isobutanol\_(engineered)\_g\_\_Odoribacter\_s\_\_Odoribacter  
PWY\_7111\_\_pyruvate\_fermentation\_to\_isobutanol\_(engineered)\_g\_\_Oxalobacter\_s\_\_Oxalobacter  
PWY\_7111\_\_pyruvate\_fermentation\_to\_isobutanol\_(engineered)\_g\_\_Parabacteroides\_s\_\_Paraba  
PWY\_7111\_\_pyruvate\_fermentation\_to\_isobutanol\_(engineered)\_g\_\_Parabacteroides\_s\_\_Paraba  
PWY\_7111\_\_pyruvate\_fermentation\_to\_isobutanol\_(engineered)\_g\_\_Parabacteroides\_s\_\_Paraba  
PWY\_7111\_\_pyruvate\_fermentation\_to\_isobutanol\_(engineered)\_g\_\_Parabacteroides\_s\_\_Paraba  
PWY\_7111\_\_pyruvate\_fermentation\_to\_isobutanol\_(engineered)\_g\_\_Parabacteroides\_s\_\_Paraba  
PWY\_7111\_\_pyruvate\_fermentation\_to\_isobutanol\_(engineered)\_g\_\_Parabacteroides\_s\_\_Paraba  
PWY\_7111\_\_pyruvate\_fermentation\_to\_isobutanol\_(engineered)\_g\_\_Paraprevotella\_s\_\_Paraprev  
PWY\_7111\_\_pyruvate\_fermentation\_to\_isobutanol\_(engineered)\_g\_\_Paraprevotella\_s\_\_Paraprev  
PWY\_7111\_\_pyruvate\_fermentation\_to\_isobutanol\_(engineered)\_g\_\_Parasutterella\_s\_\_Parasutte  
PWY\_7111\_\_pyruvate\_fermentation\_to\_isobutanol\_(engineered)\_g\_\_Peptostreptococcaceae\_non  
PWY\_7111\_\_pyruvate\_fermentation\_to\_isobutanol\_(engineered)\_g\_\_Phascolarctobacterium\_s\_\_F  
PWY\_7111\_\_pyruvate\_fermentation\_to\_isobutanol\_(engineered)\_g\_\_Propionibacterium\_s\_\_Prop  
PWY\_7111\_\_pyruvate\_fermentation\_to\_isobutanol\_(engineered)\_g\_\_Ruminococcaceae\_noname\_  
PWY\_7111\_\_pyruvate\_fermentation\_to\_isobutanol\_(engineered)\_g\_\_Ruminococcus\_s\_\_Ruminoc  
PWY\_7111\_\_pyruvate\_fermentation\_to\_isobutanol\_(engineered)\_g\_\_Ruminococcus\_s\_\_Ruminoc  
PWY\_7111\_\_pyruvate\_fermentation\_to\_isobutanol\_(engineered)\_g\_\_Streptococcus\_s\_\_Streptoco  
PWY\_7111\_\_pyruvate\_fermentation\_to\_isobutanol\_(engineered)\_g\_\_Streptococcus\_s\_\_Streptoco  
PWY\_7111\_\_pyruvate\_fermentation\_to\_isobutanol\_(engineered)\_g\_\_Streptococcus\_s\_\_Streptoco  
PWY\_7111\_\_pyruvate\_fermentation\_to\_isobutanol\_(engineered)\_g\_\_Streptococcus\_s\_\_Streptoco  
PWY\_7111\_\_pyruvate\_fermentation\_to\_isobutanol\_(engineered)\_g\_\_Subdoligranulum\_s\_\_Subdol  
PWY\_7111\_\_pyruvate\_fermentation\_to\_isobutanol\_(engineered)\_g\_\_Veillonella\_s\_\_Veillonella\_d  
PWY\_7111\_\_pyruvate\_fermentation\_to\_isobutanol\_(engineered)\_g\_\_Veillonella\_s\_\_Veillonella\_p  
PWY\_7118\_\_chitin\_degradation\_to\_ethanol  
PWY\_7165\_\_L\_ascorbate\_biosynthesis\_VI\_(engineered\_pathway)  
PWY\_7184\_\_pyrimidine\_deoxyribonucleotides\_de\_novo\_biosynthesis\_I\_g\_\_Burkholderiales\_nona  
PWY\_7184\_\_pyrimidine\_deoxyribonucleotides\_de\_novo\_biosynthesis\_I\_g\_\_Citrobacter\_s\_\_Citrob  
PWY\_7184\_\_pyrimidine\_deoxyribonucleotides\_de\_novo\_biosynthesis\_I\_g\_\_Eggerthella\_s\_\_Egger  
PWY\_7184\_\_pyrimidine\_deoxyribonucleotides\_de\_novo\_biosynthesis\_I\_g\_\_Klebsiella\_s\_\_Klebsiel  
PWY\_7184\_\_pyrimidine\_deoxyribonucleotides\_de\_novo\_biosynthesis\_I\_g\_\_Parasutterella\_s\_\_Par  
PWY\_7184\_\_pyrimidine\_deoxyribonucleotides\_de\_novo\_biosynthesis\_I\_g\_\_Veillonella\_s\_\_Veillon  
PWY\_7184\_\_pyrimidine\_deoxyribonucleotides\_de\_novo\_biosynthesis\_I\_g\_\_Veillonella\_s\_\_Veillon  
PWY\_7187\_\_pyrimidine\_deoxyribonucleotides\_de\_novo\_biosynthesis\_II\_g\_\_Klebsiella\_s\_\_Klebsie  
PWY\_7197\_\_pyrimidine\_deoxyribonucleotide\_phosphorylation\_g\_\_Actinomyces\_s\_\_Actinomyces\_  
PWY\_7197\_\_pyrimidine\_deoxyribonucleotide\_phosphorylation\_g\_\_Adlercreutzia\_s\_\_Adlercreutzia  
PWY\_7197\_\_pyrimidine\_deoxyribonucleotide\_phosphorylation\_g\_\_Akkermansia\_s\_\_Akkermansia  
PWY\_7197\_\_pyrimidine\_deoxyribonucleotide\_phosphorylation\_g\_\_Bilophila\_s\_\_Bilophila\_wadsw  
PWY\_7197\_\_pyrimidine\_deoxyribonucleotide\_phosphorylation\_g\_\_Burkholderiales\_noname\_s\_\_E  
PWY\_7197\_\_pyrimidine\_deoxyribonucleotide\_phosphorylation\_g\_\_Citrobacter\_s\_\_Citrobacter\_fre

PWY\_7197\_\_pyrimidine\_deoxyribonucleotide\_phosphorylation\_g\_Collinsella\_s\_Collinsella\_inte  
PWY\_7197\_\_pyrimidine\_deoxyribonucleotide\_phosphorylation\_g\_Collinsella\_s\_Collinsella\_tana  
PWY\_7197\_\_pyrimidine\_deoxyribonucleotide\_phosphorylation\_g\_Dialister\_s\_Dialister\_invisus  
PWY\_7197\_\_pyrimidine\_deoxyribonucleotide\_phosphorylation\_g\_Eggerthella\_s\_Eggerthella\_le  
PWY\_7197\_\_pyrimidine\_deoxyribonucleotide\_phosphorylation\_g\_Eggerthella\_s\_Eggerthella\_sp  
PWY\_7197\_\_pyrimidine\_deoxyribonucleotide\_phosphorylation\_g\_Eggerthella\_s\_Eggerthella\_sp  
PWY\_7197\_\_pyrimidine\_deoxyribonucleotide\_phosphorylation\_g\_Enterorhabdus\_s\_Enterorhab  
PWY\_7197\_\_pyrimidine\_deoxyribonucleotide\_phosphorylation\_g\_Klebsiella\_s\_Klebsiella\_pneur  
PWY\_7197\_\_pyrimidine\_deoxyribonucleotide\_phosphorylation\_g\_Lactobacillus\_s\_Lactobacillus  
PWY\_7197\_\_pyrimidine\_deoxyribonucleotide\_phosphorylation\_g\_Methanobrevibacter\_s\_Meth  
PWY\_7197\_\_pyrimidine\_deoxyribonucleotide\_phosphorylation\_g\_Parasutterella\_s\_Parasutterel  
PWY\_7197\_\_pyrimidine\_deoxyribonucleotide\_phosphorylation\_g\_Pediococcus\_s\_Pediococcus\_  
PWY\_7197\_\_pyrimidine\_deoxyribonucleotide\_phosphorylation\_g\_Phascolarctobacterium\_s\_Ph  
PWY\_7197\_\_pyrimidine\_deoxyribonucleotide\_phosphorylation\_g\_Propionibacterium\_s\_Propior  
PWY\_7197\_\_pyrimidine\_deoxyribonucleotide\_phosphorylation\_g\_Slackia\_s\_Slackia\_piriformis  
PWY\_7197\_\_pyrimidine\_deoxyribonucleotide\_phosphorylation\_g\_Streptococcus\_s\_Streptococc  
PWY\_7197\_\_pyrimidine\_deoxyribonucleotide\_phosphorylation\_g\_Veillonella\_s\_Veillonella\_dis  
PWY\_7197\_\_pyrimidine\_deoxyribonucleotide\_phosphorylation\_g\_Veillonella\_s\_Veillonella\_par  
PWY\_7199\_\_pyrimidine\_deoxyribonucleosides\_salvage\_g\_Alistipes\_s\_Alistipes\_finegoldii  
PWY\_7199\_\_pyrimidine\_deoxyribonucleosides\_salvage\_g\_Alistipes\_s\_Alistipes\_sp\_HGB5  
PWY\_7199\_\_pyrimidine\_deoxyribonucleosides\_salvage\_g\_Citrobacter\_s\_Citrobacter\_freundii  
PWY\_7199\_\_pyrimidine\_deoxyribonucleosides\_salvage\_g\_Enterobacter\_s\_Enterobacter\_cloaca  
PWY\_7199\_\_pyrimidine\_deoxyribonucleosides\_salvage\_g\_Enterococcus\_s\_Enterococcus\_faecal  
PWY\_7199\_\_pyrimidine\_deoxyribonucleosides\_salvage\_g\_Enterococcus\_s\_Enterococcus\_faeci  
PWY\_7199\_\_pyrimidine\_deoxyribonucleosides\_salvage\_g\_Lactococcus\_s\_Lactococcus\_lactis  
PWY\_7199\_\_pyrimidine\_deoxyribonucleosides\_salvage\_g\_Streptococcus\_s\_Streptococcus\_mit  
PWY\_7199\_\_pyrimidine\_deoxyribonucleosides\_salvage\_g\_Streptococcus\_s\_Streptococcus\_ther  
PWY\_7200\_\_superpathway\_of\_pyrimidine\_deoxyribonucleoside\_salvage  
PWY\_7204\_\_pyridoxal\_5\_\_phosphate\_salvage\_II\_(plants)\_unclassified  
PWY\_7208\_\_superpathway\_of\_pyrimidine\_nucleobases\_salvage\_g\_Actinomyces\_s\_Actinomyce  
PWY\_7208\_\_superpathway\_of\_pyrimidine\_nucleobases\_salvage\_g\_Adlercreutzia\_s\_Adlercreutz  
PWY\_7208\_\_superpathway\_of\_pyrimidine\_nucleobases\_salvage\_g\_Akkermansia\_s\_Akkermansi  
PWY\_7208\_\_superpathway\_of\_pyrimidine\_nucleobases\_salvage\_g\_Bilophila\_s\_Bilophila\_wads  
PWY\_7208\_\_superpathway\_of\_pyrimidine\_nucleobases\_salvage\_g\_Blautia\_s\_Blautia\_sp\_KLE\_1  
PWY\_7208\_\_superpathway\_of\_pyrimidine\_nucleobases\_salvage\_g\_Blautia\_s\_Ruminococcus\_ok  
PWY\_7208\_\_superpathway\_of\_pyrimidine\_nucleobases\_salvage\_g\_Burkholderiales\_noname\_s\_  
PWY\_7208\_\_superpathway\_of\_pyrimidine\_nucleobases\_salvage\_g\_Citrobacter\_s\_Citrobacter\_f  
PWY\_7208\_\_superpathway\_of\_pyrimidine\_nucleobases\_salvage\_g\_Clostridium\_s\_Clostridium\_  
PWY\_7208\_\_superpathway\_of\_pyrimidine\_nucleobases\_salvage\_g\_Collinsella\_s\_Collinsella\_int  
PWY\_7208\_\_superpathway\_of\_pyrimidine\_nucleobases\_salvage\_g\_Collinsella\_s\_Collinsella\_tar  
PWY\_7208\_\_superpathway\_of\_pyrimidine\_nucleobases\_salvage\_g\_Coprococcus\_s\_Coprococcu  
PWY\_7208\_\_superpathway\_of\_pyrimidine\_nucleobases\_salvage\_g\_Coprococcus\_s\_Coprococcu  
PWY\_7208\_\_superpathway\_of\_pyrimidine\_nucleobases\_salvage\_g\_Dialister\_s\_Dialister\_invisus  
PWY\_7208\_\_superpathway\_of\_pyrimidine\_nucleobases\_salvage\_g\_Enterobacter\_s\_Enterobacte  
PWY\_7208\_\_superpathway\_of\_pyrimidine\_nucleobases\_salvage\_g\_Enterorhabdus\_s\_Enterorha  
PWY\_7208\_\_superpathway\_of\_pyrimidine\_nucleobases\_salvage\_g\_Eubacterium\_s\_Eubacteriun  
PWY\_7208\_\_superpathway\_of\_pyrimidine\_nucleobases\_salvage\_g\_Gordonibacter\_s\_Gordoniba



PWY\_7219\_\_adenosine\_ribonucleotides\_de\_novo\_biosynthesis\_g\_\_Bacteroides\_s\_\_Bacteroides\_s  
PWY\_7219\_\_adenosine\_ribonucleotides\_de\_novo\_biosynthesis\_g\_\_Bacteroides\_s\_\_Bacteroides\_s  
PWY\_7219\_\_adenosine\_ribonucleotides\_de\_novo\_biosynthesis\_g\_\_Bacteroides\_s\_\_Bacteroides\_s  
PWY\_7219\_\_adenosine\_ribonucleotides\_de\_novo\_biosynthesis\_g\_\_Bacteroides\_s\_\_Bacteroides\_t  
PWY\_7219\_\_adenosine\_ribonucleotides\_de\_novo\_biosynthesis\_g\_\_Bacteroides\_s\_\_Bacteroides\_u  
PWY\_7219\_\_adenosine\_ribonucleotides\_de\_novo\_biosynthesis\_g\_\_Bacteroides\_s\_\_Bacteroides\_x  
PWY\_7219\_\_adenosine\_ribonucleotides\_de\_novo\_biosynthesis\_g\_\_Barnesiella\_s\_\_Barnesiella\_int  
PWY\_7219\_\_adenosine\_ribonucleotides\_de\_novo\_biosynthesis\_g\_\_Bifidobacterium\_s\_\_Bifidobac  
PWY\_7219\_\_adenosine\_ribonucleotides\_de\_novo\_biosynthesis\_g\_\_Bifidobacterium\_s\_\_Bifidobac  
PWY\_7219\_\_adenosine\_ribonucleotides\_de\_novo\_biosynthesis\_g\_\_Bifidobacterium\_s\_\_Bifidobac  
PWY\_7219\_\_adenosine\_ribonucleotides\_de\_novo\_biosynthesis\_g\_\_Bifidobacterium\_s\_\_Bifidobac  
PWY\_7219\_\_adenosine\_ribonucleotides\_de\_novo\_biosynthesis\_g\_\_Bifidobacterium\_s\_\_Bifidobac  
PWY\_7219\_\_adenosine\_ribonucleotides\_de\_novo\_biosynthesis\_g\_\_Bifidobacterium\_s\_\_Bifidobac  
PWY\_7219\_\_adenosine\_ribonucleotides\_de\_novo\_biosynthesis\_g\_\_Bilophila\_s\_\_Bilophila\_wadsw  
PWY\_7219\_\_adenosine\_ribonucleotides\_de\_novo\_biosynthesis\_g\_\_Blautia\_s\_\_Blautia\_hydrogenc  
PWY\_7219\_\_adenosine\_ribonucleotides\_de\_novo\_biosynthesis\_g\_\_Blautia\_s\_\_Blautia\_sp\_KLE\_17  
PWY\_7219\_\_adenosine\_ribonucleotides\_de\_novo\_biosynthesis\_g\_\_Blautia\_s\_\_Ruminococcus\_gnā  
PWY\_7219\_\_adenosine\_ribonucleotides\_de\_novo\_biosynthesis\_g\_\_Blautia\_s\_\_Ruminococcus\_obē  
PWY\_7219\_\_adenosine\_ribonucleotides\_de\_novo\_biosynthesis\_g\_\_Burkholderiales\_noname\_s\_\_l  
PWY\_7219\_\_adenosine\_ribonucleotides\_de\_novo\_biosynthesis\_g\_\_Butyrivibrio\_s\_\_Butyrivibrio\_c  
PWY\_7219\_\_adenosine\_ribonucleotides\_de\_novo\_biosynthesis\_g\_\_Catenibacterium\_s\_\_Cateniba  
PWY\_7219\_\_adenosine\_ribonucleotides\_de\_novo\_biosynthesis\_g\_\_Citrobacter\_s\_\_Citrobacter\_fr  
PWY\_7219\_\_adenosine\_ribonucleotides\_de\_novo\_biosynthesis\_g\_\_Clostridiales\_noname\_s\_\_Bac  
PWY\_7219\_\_adenosine\_ribonucleotides\_de\_novo\_biosynthesis\_g\_\_Clostridiales\_noname\_s\_\_Clos  
PWY\_7219\_\_adenosine\_ribonucleotides\_de\_novo\_biosynthesis\_g\_\_Clostridium\_s\_\_Clostridium\_a  
PWY\_7219\_\_adenosine\_ribonucleotides\_de\_novo\_biosynthesis\_g\_\_Clostridium\_s\_\_Clostridium\_b  
PWY\_7219\_\_adenosine\_ribonucleotides\_de\_novo\_biosynthesis\_g\_\_Clostridium\_s\_\_Clostridium\_c  
PWY\_7219\_\_adenosine\_ribonucleotides\_de\_novo\_biosynthesis\_g\_\_Clostridium\_s\_\_Clostridium\_c  
PWY\_7219\_\_adenosine\_ribonucleotides\_de\_novo\_biosynthesis\_g\_\_Clostridium\_s\_\_Clostridium\_h  
PWY\_7219\_\_adenosine\_ribonucleotides\_de\_novo\_biosynthesis\_g\_\_Clostridium\_s\_\_Clostridium\_le  
PWY\_7219\_\_adenosine\_ribonucleotides\_de\_novo\_biosynthesis\_g\_\_Clostridium\_s\_\_Clostridium\_p  
PWY\_7219\_\_adenosine\_ribonucleotides\_de\_novo\_biosynthesis\_g\_\_Clostridium\_s\_\_Clostridium\_s  
PWY\_7219\_\_adenosine\_ribonucleotides\_de\_novo\_biosynthesis\_g\_\_Clostridium\_s\_\_Clostridium\_s  
PWY\_7219\_\_adenosine\_ribonucleotides\_de\_novo\_biosynthesis\_g\_\_Clostridium\_s\_\_Clostridium\_s  
PWY\_7219\_\_adenosine\_ribonucleotides\_de\_novo\_biosynthesis\_g\_\_Collinsella\_s\_\_Collinsella\_inte  
PWY\_7219\_\_adenosine\_ribonucleotides\_de\_novo\_biosynthesis\_g\_\_Collinsella\_s\_\_Collinsella\_tanā  
PWY\_7219\_\_adenosine\_ribonucleotides\_de\_novo\_biosynthesis\_g\_\_Copro bacter\_s\_\_Copro bacter\_  
PWY\_7219\_\_adenosine\_ribonucleotides\_de\_novo\_biosynthesis\_g\_\_Coproco ccus\_s\_\_Coproco ccus\_  
PWY\_7219\_\_adenosine\_ribonucleotides\_de\_novo\_biosynthesis\_g\_\_Coproco ccus\_s\_\_Coproco ccus\_  
PWY\_7219\_\_adenosine\_ribonucleotides\_de\_novo\_biosynthesis\_g\_\_Coproco ccus\_s\_\_Coproco ccus\_  
PWY\_7219\_\_adenosine\_ribonucleotides\_de\_novo\_biosynthesis\_g\_\_Dialister\_s\_\_Dialister\_invisus  
PWY\_7219\_\_adenosine\_ribonucleotides\_de\_novo\_biosynthesis\_g\_\_Dorea\_s\_\_Dorea\_formicigene  
PWY\_7219\_\_adenosine\_ribonucleotides\_de\_novo\_biosynthesis\_g\_\_Eggerthella\_s\_\_Eggerthella\_le  
PWY\_7219\_\_adenosine\_ribonucleotides\_de\_novo\_biosynthesis\_g\_\_Eggerthella\_s\_\_Eggerthella\_sp  
PWY\_7219\_\_adenosine\_ribonucleotides\_de\_novo\_biosynthesis\_g\_\_Eggerthella\_s\_\_Eggerthella\_sp  
PWY\_7219\_\_adenosine\_ribonucleotides\_de\_novo\_biosynthesis\_g\_\_Enterobacter\_s\_\_Enterobacter  
PWY\_7219\_\_adenosine\_ribonucleotides\_de\_novo\_biosynthesis\_g\_\_Enterococcus\_s\_\_Enterococcu



PWY\_7219\_\_adenosine\_ribonucleotides\_de\_novo\_biosynthesis\_g\_\_Peptostreptococcaceae\_nonar  
PWY\_7219\_\_adenosine\_ribonucleotides\_de\_novo\_biosynthesis\_g\_\_Phascolarctobacterium\_s\_\_Ph  
PWY\_7219\_\_adenosine\_ribonucleotides\_de\_novo\_biosynthesis\_g\_\_Prevotella\_s\_\_Prevotella\_copi  
PWY\_7219\_\_adenosine\_ribonucleotides\_de\_novo\_biosynthesis\_g\_\_Propionibacterium\_s\_\_Propio  
PWY\_7219\_\_adenosine\_ribonucleotides\_de\_novo\_biosynthesis\_g\_\_Roseburia\_s\_\_Roseburia\_hom  
PWY\_7219\_\_adenosine\_ribonucleotides\_de\_novo\_biosynthesis\_g\_\_Roseburia\_s\_\_Roseburia\_inuli  
PWY\_7219\_\_adenosine\_ribonucleotides\_de\_novo\_biosynthesis\_g\_\_Ruminococcaceae\_noname\_s\_\_  
PWY\_7219\_\_adenosine\_ribonucleotides\_de\_novo\_biosynthesis\_g\_\_Ruminococcus\_s\_\_Ruminococ  
PWY\_7219\_\_adenosine\_ribonucleotides\_de\_novo\_biosynthesis\_g\_\_Ruminococcus\_s\_\_Ruminococ  
PWY\_7219\_\_adenosine\_ribonucleotides\_de\_novo\_biosynthesis\_g\_\_Ruminococcus\_s\_\_Ruminococ  
PWY\_7219\_\_adenosine\_ribonucleotides\_de\_novo\_biosynthesis\_g\_\_Ruminococcus\_s\_\_Ruminococ  
PWY\_7219\_\_adenosine\_ribonucleotides\_de\_novo\_biosynthesis\_g\_\_Slackia\_s\_\_Slackia\_piriformis  
PWY\_7219\_\_adenosine\_ribonucleotides\_de\_novo\_biosynthesis\_g\_\_Solobacterium\_s\_\_Solobacteri  
PWY\_7219\_\_adenosine\_ribonucleotides\_de\_novo\_biosynthesis\_g\_\_Streptococcus\_s\_\_Streptococc  
PWY\_7219\_\_adenosine\_ribonucleotides\_de\_novo\_biosynthesis\_g\_\_Streptococcus\_s\_\_Streptococc  
PWY\_7219\_\_adenosine\_ribonucleotides\_de\_novo\_biosynthesis\_g\_\_Streptococcus\_s\_\_Streptococc  
PWY\_7219\_\_adenosine\_ribonucleotides\_de\_novo\_biosynthesis\_g\_\_Subdoligranulum\_s\_\_Subdoli  
PWY\_7219\_\_adenosine\_ribonucleotides\_de\_novo\_biosynthesis\_g\_\_Veillonella\_s\_\_Veillonella\_dis  
PWY\_7219\_\_adenosine\_ribonucleotides\_de\_novo\_biosynthesis\_g\_\_Veillonella\_s\_\_Veillonella\_par  
PWY\_7220\_\_adenosine\_deoxyribonucleotides\_de\_novo\_biosynthesis\_II\_g\_\_Actinomyces\_s\_\_Acti  
PWY\_7220\_\_adenosine\_deoxyribonucleotides\_de\_novo\_biosynthesis\_II\_g\_\_Bacteroides\_s\_\_Bacte  
PWY\_7220\_\_adenosine\_deoxyribonucleotides\_de\_novo\_biosynthesis\_II\_g\_\_Bacteroides\_s\_\_Bacte  
PWY\_7220\_\_adenosine\_deoxyribonucleotides\_de\_novo\_biosynthesis\_II\_g\_\_Bacteroides\_s\_\_Bacte  
PWY\_7220\_\_adenosine\_deoxyribonucleotides\_de\_novo\_biosynthesis\_II\_g\_\_Bacteroides\_s\_\_Bacte  
PWY\_7220\_\_adenosine\_deoxyribonucleotides\_de\_novo\_biosynthesis\_II\_g\_\_Bacteroides\_s\_\_Bacte  
PWY\_7220\_\_adenosine\_deoxyribonucleotides\_de\_novo\_biosynthesis\_II\_g\_\_Bacteroides\_s\_\_Bacte  
PWY\_7220\_\_adenosine\_deoxyribonucleotides\_de\_novo\_biosynthesis\_II\_g\_\_Burkholderiales\_nona  
PWY\_7220\_\_adenosine\_deoxyribonucleotides\_de\_novo\_biosynthesis\_II\_g\_\_Citrobacter\_s\_\_Citrob  
PWY\_7220\_\_adenosine\_deoxyribonucleotides\_de\_novo\_biosynthesis\_II\_g\_\_Clostridiales\_noname  
PWY\_7220\_\_adenosine\_deoxyribonucleotides\_de\_novo\_biosynthesis\_II\_g\_\_Clostridium\_s\_\_Clostr  
PWY\_7220\_\_adenosine\_deoxyribonucleotides\_de\_novo\_biosynthesis\_II\_g\_\_Clostridium\_s\_\_Clostr  
PWY\_7220\_\_adenosine\_deoxyribonucleotides\_de\_novo\_biosynthesis\_II\_g\_\_Collinsella\_s\_\_Collins  
PWY\_7220\_\_adenosine\_deoxyribonucleotides\_de\_novo\_biosynthesis\_II\_g\_\_Collinsella\_s\_\_Collins  
PWY\_7220\_\_adenosine\_deoxyribonucleotides\_de\_novo\_biosynthesis\_II\_g\_\_Eggerthella\_s\_\_Egger  
PWY\_7220\_\_adenosine\_deoxyribonucleotides\_de\_novo\_biosynthesis\_II\_g\_\_Eggerthella\_s\_\_Egger  
PWY\_7220\_\_adenosine\_deoxyribonucleotides\_de\_novo\_biosynthesis\_II\_g\_\_Eggerthella\_s\_\_Egger  
PWY\_7220\_\_adenosine\_deoxyribonucleotides\_de\_novo\_biosynthesis\_II\_g\_\_Faecalibacterium\_s\_\_  
PWY\_7220\_\_adenosine\_deoxyribonucleotides\_de\_novo\_biosynthesis\_II\_g\_\_Holdemania\_s\_\_Hold  
PWY\_7220\_\_adenosine\_deoxyribonucleotides\_de\_novo\_biosynthesis\_II\_g\_\_Klebsiella\_s\_\_Klebsiel  
PWY\_7220\_\_adenosine\_deoxyribonucleotides\_de\_novo\_biosynthesis\_II\_g\_\_Oxalobacter\_s\_\_Oxalob  
PWY\_7220\_\_adenosine\_deoxyribonucleotides\_de\_novo\_biosynthesis\_II\_g\_\_Parasutterella\_s\_\_Par  
PWY\_7220\_\_adenosine\_deoxyribonucleotides\_de\_novo\_biosynthesis\_II\_g\_\_Slackia\_s\_\_Slackia\_pi  
PWY\_7220\_\_adenosine\_deoxyribonucleotides\_de\_novo\_biosynthesis\_II\_g\_\_Solobacterium\_s\_\_So  
PWY\_7220\_\_adenosine\_deoxyribonucleotides\_de\_novo\_biosynthesis\_II\_g\_\_Streptococcus\_s\_\_Str  
PWY\_7220\_\_adenosine\_deoxyribonucleotides\_de\_novo\_biosynthesis\_II\_g\_\_Streptococcus\_s\_\_Str  
PWY\_7220\_\_adenosine\_deoxyribonucleotides\_de\_novo\_biosynthesis\_II\_g\_\_Veillonella\_s\_\_Veillor  
PWY\_7220\_\_adenosine\_deoxyribonucleotides\_de\_novo\_biosynthesis\_II\_g\_\_Veillonella\_s\_\_Veillor





PWY\_7221\_guanosine\_ribonucleotides\_de\_novo\_biosynthesis\_g\_Butyrivibrio\_s\_Butyrivibrio\_c  
PWY\_7221\_guanosine\_ribonucleotides\_de\_novo\_biosynthesis\_g\_Citrobacter\_s\_Citrobacter\_fr  
PWY\_7221\_guanosine\_ribonucleotides\_de\_novo\_biosynthesis\_g\_Clostridiales\_noname\_s\_Baci  
PWY\_7221\_guanosine\_ribonucleotides\_de\_novo\_biosynthesis\_g\_Clostridium\_s\_Clostridium\_a  
PWY\_7221\_guanosine\_ribonucleotides\_de\_novo\_biosynthesis\_g\_Clostridium\_s\_Clostridium\_b  
PWY\_7221\_guanosine\_ribonucleotides\_de\_novo\_biosynthesis\_g\_Clostridium\_s\_Clostridium\_c  
PWY\_7221\_guanosine\_ribonucleotides\_de\_novo\_biosynthesis\_g\_Clostridium\_s\_Clostridium\_c  
PWY\_7221\_guanosine\_ribonucleotides\_de\_novo\_biosynthesis\_g\_Clostridium\_s\_Clostridium\_h  
PWY\_7221\_guanosine\_ribonucleotides\_de\_novo\_biosynthesis\_g\_Clostridium\_s\_Clostridium\_le  
PWY\_7221\_guanosine\_ribonucleotides\_de\_novo\_biosynthesis\_g\_Clostridium\_s\_Clostridium\_p  
PWY\_7221\_guanosine\_ribonucleotides\_de\_novo\_biosynthesis\_g\_Clostridium\_s\_Clostridium\_s  
PWY\_7221\_guanosine\_ribonucleotides\_de\_novo\_biosynthesis\_g\_Collinsella\_s\_Collinsella\_tana  
PWY\_7221\_guanosine\_ribonucleotides\_de\_novo\_biosynthesis\_g\_Copro bacter\_s\_Copro bacter\_  
PWY\_7221\_guanosine\_ribonucleotides\_de\_novo\_biosynthesis\_g\_Coprococcus\_s\_Coprococcus\_  
PWY\_7221\_guanosine\_ribonucleotides\_de\_novo\_biosynthesis\_g\_Coprococcus\_s\_Coprococcus\_  
PWY\_7221\_guanosine\_ribonucleotides\_de\_novo\_biosynthesis\_g\_Dialister\_s\_Dialister\_invisus  
PWY\_7221\_guanosine\_ribonucleotides\_de\_novo\_biosynthesis\_g\_Eggerthella\_s\_Eggerthella\_le  
PWY\_7221\_guanosine\_ribonucleotides\_de\_novo\_biosynthesis\_g\_Eggerthella\_s\_Eggerthella\_sp  
PWY\_7221\_guanosine\_ribonucleotides\_de\_novo\_biosynthesis\_g\_Eggerthella\_s\_Eggerthella\_sp  
PWY\_7221\_guanosine\_ribonucleotides\_de\_novo\_biosynthesis\_g\_Enterobacter\_s\_Enterobacter  
PWY\_7221\_guanosine\_ribonucleotides\_de\_novo\_biosynthesis\_g\_Enterococcus\_s\_Enterococcu  
PWY\_7221\_guanosine\_ribonucleotides\_de\_novo\_biosynthesis\_g\_Enterococcus\_s\_Enterococcu  
PWY\_7221\_guanosine\_ribonucleotides\_de\_novo\_biosynthesis\_g\_Enterococcus\_s\_Enterococcu  
PWY\_7221\_guanosine\_ribonucleotides\_de\_novo\_biosynthesis\_g\_Eubacterium\_s\_Eubacterium  
PWY\_7221\_guanosine\_ribonucleotides\_de\_novo\_biosynthesis\_g\_Eubacterium\_s\_Eubacterium  
PWY\_7221\_guanosine\_ribonucleotides\_de\_novo\_biosynthesis\_g\_Eubacterium\_s\_Eubacterium  
PWY\_7221\_guanosine\_ribonucleotides\_de\_novo\_biosynthesis\_g\_Eubacterium\_s\_Eubacterium  
PWY\_7221\_guanosine\_ribonucleotides\_de\_novo\_biosynthesis\_g\_Eubacterium\_s\_Eubacterium  
PWY\_7221\_guanosine\_ribonucleotides\_de\_novo\_biosynthesis\_g\_Gemella\_s\_Gemella\_sanguin  
PWY\_7221\_guanosine\_ribonucleotides\_de\_novo\_biosynthesis\_g\_Holdemania\_s\_Holdemania\_  
PWY\_7221\_guanosine\_ribonucleotides\_de\_novo\_biosynthesis\_g\_Klebsiella\_s\_Klebsiella\_pneu  
PWY\_7221\_guanosine\_ribonucleotides\_de\_novo\_biosynthesis\_g\_Lachnospiraceae\_noname\_s\_  
PWY\_7221\_guanosine\_ribonucleotides\_de\_novo\_biosynthesis\_g\_Lachnospiraceae\_noname\_s\_  
PWY\_7221\_guanosine\_ribonucleotides\_de\_novo\_biosynthesis\_g\_Lachnospiraceae\_noname\_s\_  
PWY\_7221\_guanosine\_ribonucleotides\_de\_novo\_biosynthesis\_g\_Lachnospiraceae\_noname\_s\_  
PWY\_7221\_guanosine\_ribonucleotides\_de\_novo\_biosynthesis\_g\_Lachnospiraceae\_noname\_s\_  
PWY\_7221\_guanosine\_ribonucleotides\_de\_novo\_biosynthesis\_g\_Lachnospiraceae\_noname\_s\_  
PWY\_7221\_guanosine\_ribonucleotides\_de\_novo\_biosynthesis\_g\_Lactobacillus\_s\_Lactobacillus  
PWY\_7221\_guanosine\_ribonucleotides\_de\_novo\_biosynthesis\_g\_Lactobacillus\_s\_Lactobacillus  
PWY\_7221\_guanosine\_ribonucleotides\_de\_novo\_biosynthesis\_g\_Lactococcus\_s\_Lactococcus\_l  
PWY\_7221\_guanosine\_ribonucleotides\_de\_novo\_biosynthesis\_g\_Methanobrevibacter\_s\_Meth  
PWY\_7221\_guanosine\_ribonucleotides\_de\_novo\_biosynthesis\_g\_Nakaseomyces\_s\_Candida\_g  
PWY\_7221\_guanosine\_ribonucleotides\_de\_novo\_biosynthesis\_g\_Odoribacter\_s\_Odoribacter\_l  
PWY\_7221\_guanosine\_ribonucleotides\_de\_novo\_biosynthesis\_g\_Odoribacter\_s\_Odoribacter\_s  
PWY\_7221\_guanosine\_ribonucleotides\_de\_novo\_biosynthesis\_g\_Oxalobacter\_s\_Oxalobacter\_  
PWY\_7221\_guanosine\_ribonucleotides\_de\_novo\_biosynthesis\_g\_Parabacteroides\_s\_Parabacte

PWY\_7221\_guanosine\_ribonucleotides\_de\_novo\_biosynthesis\_g\_Parabacteroides\_s\_Parabacte  
PWY\_7221\_guanosine\_ribonucleotides\_de\_novo\_biosynthesis\_g\_Parabacteroides\_s\_Parabacte  
PWY\_7221\_guanosine\_ribonucleotides\_de\_novo\_biosynthesis\_g\_Parabacteroides\_s\_Parabacte  
PWY\_7221\_guanosine\_ribonucleotides\_de\_novo\_biosynthesis\_g\_Parabacteroides\_s\_Parabacte  
PWY\_7221\_guanosine\_ribonucleotides\_de\_novo\_biosynthesis\_g\_Paraprevotella\_s\_Paraprevot  
PWY\_7221\_guanosine\_ribonucleotides\_de\_novo\_biosynthesis\_g\_Parasutterella\_s\_Parasuttere  
PWY\_7221\_guanosine\_ribonucleotides\_de\_novo\_biosynthesis\_g\_Pediococcus\_s\_Pediococcus\_  
PWY\_7221\_guanosine\_ribonucleotides\_de\_novo\_biosynthesis\_g\_Pediococcus\_s\_Pediococcus\_  
PWY\_7221\_guanosine\_ribonucleotides\_de\_novo\_biosynthesis\_g\_Peptostreptococcaceae\_nonar  
PWY\_7221\_guanosine\_ribonucleotides\_de\_novo\_biosynthesis\_g\_Phascolarctobacterium\_s\_Ph  
PWY\_7221\_guanosine\_ribonucleotides\_de\_novo\_biosynthesis\_g\_Prevotella\_s\_Prevotella\_copi  
PWY\_7221\_guanosine\_ribonucleotides\_de\_novo\_biosynthesis\_g\_Propionibacterium\_s\_Propioi  
PWY\_7221\_guanosine\_ribonucleotides\_de\_novo\_biosynthesis\_g\_Roseburia\_s\_Roseburia\_inuli  
PWY\_7221\_guanosine\_ribonucleotides\_de\_novo\_biosynthesis\_g\_Rothia\_s\_Rothia\_mucilagino:  
PWY\_7221\_guanosine\_ribonucleotides\_de\_novo\_biosynthesis\_g\_Ruminococcaceae\_noname\_s\_  
PWY\_7221\_guanosine\_ribonucleotides\_de\_novo\_biosynthesis\_g\_Ruminococcus\_s\_Ruminococ  
PWY\_7221\_guanosine\_ribonucleotides\_de\_novo\_biosynthesis\_g\_Ruminococcus\_s\_Ruminococ  
PWY\_7221\_guanosine\_ribonucleotides\_de\_novo\_biosynthesis\_g\_Slackia\_s\_Slackia\_piriformis  
PWY\_7221\_guanosine\_ribonucleotides\_de\_novo\_biosynthesis\_g\_Solobacterium\_s\_Solobacteri  
PWY\_7221\_guanosine\_ribonucleotides\_de\_novo\_biosynthesis\_g\_Streptococcus\_s\_Streptococc  
PWY\_7221\_guanosine\_ribonucleotides\_de\_novo\_biosynthesis\_g\_Streptococcus\_s\_Streptococc  
PWY\_7221\_guanosine\_ribonucleotides\_de\_novo\_biosynthesis\_g\_Veillonella\_s\_Veillonella\_disj  
PWY\_7221\_guanosine\_ribonucleotides\_de\_novo\_biosynthesis\_g\_Veillonella\_s\_Veillonella\_par  
PWY\_7222\_guanosine\_deoxyribonucleotides\_de\_novo\_biosynthesis\_II\_g\_Actinomyces\_s\_Acti  
PWY\_7222\_guanosine\_deoxyribonucleotides\_de\_novo\_biosynthesis\_II\_g\_Bacteroides\_s\_Bacte  
PWY\_7222\_guanosine\_deoxyribonucleotides\_de\_novo\_biosynthesis\_II\_g\_Bacteroides\_s\_Bacte  
PWY\_7222\_guanosine\_deoxyribonucleotides\_de\_novo\_biosynthesis\_II\_g\_Bacteroides\_s\_Bacte  
PWY\_7222\_guanosine\_deoxyribonucleotides\_de\_novo\_biosynthesis\_II\_g\_Bacteroides\_s\_Bacte  
PWY\_7222\_guanosine\_deoxyribonucleotides\_de\_novo\_biosynthesis\_II\_g\_Bacteroides\_s\_Bacte  
PWY\_7222\_guanosine\_deoxyribonucleotides\_de\_novo\_biosynthesis\_II\_g\_Bacteroides\_s\_Bacte  
PWY\_7222\_guanosine\_deoxyribonucleotides\_de\_novo\_biosynthesis\_II\_g\_Burkholderiales\_nona  
PWY\_7222\_guanosine\_deoxyribonucleotides\_de\_novo\_biosynthesis\_II\_g\_Citrobacter\_s\_Citrob  
PWY\_7222\_guanosine\_deoxyribonucleotides\_de\_novo\_biosynthesis\_II\_g\_Clostridiales\_noname  
PWY\_7222\_guanosine\_deoxyribonucleotides\_de\_novo\_biosynthesis\_II\_g\_Clostridium\_s\_Clostr  
PWY\_7222\_guanosine\_deoxyribonucleotides\_de\_novo\_biosynthesis\_II\_g\_Clostridium\_s\_Clostr  
PWY\_7222\_guanosine\_deoxyribonucleotides\_de\_novo\_biosynthesis\_II\_g\_Collinsella\_s\_Collinsi  
PWY\_7222\_guanosine\_deoxyribonucleotides\_de\_novo\_biosynthesis\_II\_g\_Collinsella\_s\_Collinsi  
PWY\_7222\_guanosine\_deoxyribonucleotides\_de\_novo\_biosynthesis\_II\_g\_Eggerthella\_s\_Egger  
PWY\_7222\_guanosine\_deoxyribonucleotides\_de\_novo\_biosynthesis\_II\_g\_Eggerthella\_s\_Egger  
PWY\_7222\_guanosine\_deoxyribonucleotides\_de\_novo\_biosynthesis\_II\_g\_Eggerthella\_s\_Egger  
PWY\_7222\_guanosine\_deoxyribonucleotides\_de\_novo\_biosynthesis\_II\_g\_Faecalibacterium\_s\_  
PWY\_7222\_guanosine\_deoxyribonucleotides\_de\_novo\_biosynthesis\_II\_g\_Holdemania\_s\_Hold  
PWY\_7222\_guanosine\_deoxyribonucleotides\_de\_novo\_biosynthesis\_II\_g\_Klebsiella\_s\_Klebsiel  
PWY\_7222\_guanosine\_deoxyribonucleotides\_de\_novo\_biosynthesis\_II\_g\_Oxalobacter\_s\_Oxalk  
PWY\_7222\_guanosine\_deoxyribonucleotides\_de\_novo\_biosynthesis\_II\_g\_Parasutterella\_s\_Par  
PWY\_7222\_guanosine\_deoxyribonucleotides\_de\_novo\_biosynthesis\_II\_g\_Slackia\_s\_Slackia\_pi  
PWY\_7222\_guanosine\_deoxyribonucleotides\_de\_novo\_biosynthesis\_II\_g\_Solobacterium\_s\_So



PWY\_7229\_\_superpathway\_of\_adenosine\_nucleotides\_de\_novo\_biosynthesis\_I\_g\_Clostridium\_s  
PWY\_7229\_\_superpathway\_of\_adenosine\_nucleotides\_de\_novo\_biosynthesis\_I\_g\_Clostridium\_s  
PWY\_7229\_\_superpathway\_of\_adenosine\_nucleotides\_de\_novo\_biosynthesis\_I\_g\_Collinsella\_s  
PWY\_7229\_\_superpathway\_of\_adenosine\_nucleotides\_de\_novo\_biosynthesis\_I\_g\_Collinsella\_s  
PWY\_7229\_\_superpathway\_of\_adenosine\_nucleotides\_de\_novo\_biosynthesis\_I\_g\_Eggerthella\_s  
PWY\_7229\_\_superpathway\_of\_adenosine\_nucleotides\_de\_novo\_biosynthesis\_I\_g\_Eggerthella\_s  
PWY\_7229\_\_superpathway\_of\_adenosine\_nucleotides\_de\_novo\_biosynthesis\_I\_g\_Eggerthella\_s  
PWY\_7229\_\_superpathway\_of\_adenosine\_nucleotides\_de\_novo\_biosynthesis\_I\_g\_Faecalibacteri  
PWY\_7229\_\_superpathway\_of\_adenosine\_nucleotides\_de\_novo\_biosynthesis\_I\_g\_Holdemania\_s  
PWY\_7229\_\_superpathway\_of\_adenosine\_nucleotides\_de\_novo\_biosynthesis\_I\_g\_Klebsiella\_s  
PWY\_7229\_\_superpathway\_of\_adenosine\_nucleotides\_de\_novo\_biosynthesis\_I\_g\_Oxalobacter\_s  
PWY\_7229\_\_superpathway\_of\_adenosine\_nucleotides\_de\_novo\_biosynthesis\_I\_g\_Slackia\_s\_Sl  
PWY\_7229\_\_superpathway\_of\_adenosine\_nucleotides\_de\_novo\_biosynthesis\_I\_g\_Solobacterium  
PWY\_7229\_\_superpathway\_of\_adenosine\_nucleotides\_de\_novo\_biosynthesis\_I\_g\_Streptococcus  
PWY\_7229\_\_superpathway\_of\_adenosine\_nucleotides\_de\_novo\_biosynthesis\_I\_g\_Veillonella\_s  
PWY\_7229\_\_superpathway\_of\_adenosine\_nucleotides\_de\_novo\_biosynthesis\_I\_g\_Veillonella\_s  
PWY\_7234\_\_inosine\_5\_\_phosphate\_biosynthesis\_III\_g\_Citrobacter\_s\_Citrobacter\_freundii  
PWY\_7234\_\_inosine\_5\_\_phosphate\_biosynthesis\_III\_g\_Coprococcus\_s\_Coprococcus\_catus  
PWY\_7234\_\_inosine\_5\_\_phosphate\_biosynthesis\_III\_g\_Enterococcus\_s\_Enterococcus\_faecium  
PWY\_7234\_\_inosine\_5\_\_phosphate\_biosynthesis\_III\_g\_Lactobacillus\_s\_Lactobacillus\_casei\_pari  
PWY\_7234\_\_inosine\_5\_\_phosphate\_biosynthesis\_III\_g\_Lactobacillus\_s\_Lactobacillus\_salivarius  
PWY\_7234\_\_inosine\_5\_\_phosphate\_biosynthesis\_III\_g\_Lactococcus\_s\_Lactococcus\_lactis  
PWY\_7234\_\_inosine\_5\_\_phosphate\_biosynthesis\_III\_g\_Streptococcus\_s\_Streptococcus\_mitis\_o  
PWY\_7237\_\_myo\_,\_chiro\_and\_scillo\_inositol\_degradation\_g\_Blautia\_s\_Blautia\_sp\_KLE\_1732  
PWY\_7237\_\_myo\_,\_chiro\_and\_scillo\_inositol\_degradation\_g\_Clostridium\_s\_Clostridium\_perfr  
PWY\_7237\_\_myo\_,\_chiro\_and\_scillo\_inositol\_degradation\_g\_Clostridium\_s\_Clostridium\_sp\_S  
PWY\_7237\_\_myo\_,\_chiro\_and\_scillo\_inositol\_degradation\_g\_Klebsiella\_s\_Klebsiella\_pneumor  
PWY\_7237\_\_myo\_,\_chiro\_and\_scillo\_inositol\_degradation\_g\_Lachnospiraceae\_noname\_s\_Lac  
PWY\_7237\_\_myo\_,\_chiro\_and\_scillo\_inositol\_degradation\_g\_Ruminococcus\_s\_Ruminococcus  
PWY\_7242\_\_D\_fructuronate\_degradation\_g\_Citrobacter\_s\_Citrobacter\_freundii  
PWY\_7242\_\_D\_fructuronate\_degradation\_g\_Lactococcus\_s\_Lactococcus\_lactis  
PWY\_724\_\_superpathway\_of\_L\_lysine,\_L\_threonine\_and\_L\_methionine\_biosynthesis\_II\_g\_Anae  
PWY\_724\_\_superpathway\_of\_L\_lysine,\_L\_threonine\_and\_L\_methionine\_biosynthesis\_II\_g\_Citro  
PWY\_724\_\_superpathway\_of\_L\_lysine,\_L\_threonine\_and\_L\_methionine\_biosynthesis\_II\_g\_Coproc  
PWY\_724\_\_superpathway\_of\_L\_lysine,\_L\_threonine\_and\_L\_methionine\_biosynthesis\_II\_g\_Coproc  
PWY\_724\_\_superpathway\_of\_L\_lysine,\_L\_threonine\_and\_L\_methionine\_biosynthesis\_II\_g\_Lacto  
PWY\_724\_\_superpathway\_of\_L\_lysine,\_L\_threonine\_and\_L\_methionine\_biosynthesis\_II\_g\_Mega  
PWY\_724\_\_superpathway\_of\_L\_lysine,\_L\_threonine\_and\_L\_methionine\_biosynthesis\_II\_g\_Oxal  
PWY\_724\_\_superpathway\_of\_L\_lysine,\_L\_threonine\_and\_L\_methionine\_biosynthesis\_II\_g\_Phase  
PWY\_724\_\_superpathway\_of\_L\_lysine,\_L\_threonine\_and\_L\_methionine\_biosynthesis\_II\_g\_Rothi  
PWY\_7254\_\_TCA\_cycle\_VII\_(acetate\_producers)\_g\_Citrobacter\_s\_Citrobacter\_freundii  
PWY\_7254\_\_TCA\_cycle\_VII\_(acetate\_producers)\_unclassified  
PWY\_7269\_\_NAD\_NADP\_NADH\_NADPH\_mitochondrial\_interconversion\_(yeast)\_unclassified  
PWY\_7279\_\_aerobic\_respiration\_II\_(cytochrome\_c)\_\_(yeast)\_g\_Nakaseomyces\_s\_Candida\_glabr  
PWY\_7282\_\_4\_amino\_2\_methyl\_5\_phosphomethylpyrimidine\_biosynthesis\_(yeast)\_g\_Bacteroid  
PWY\_7282\_\_4\_amino\_2\_methyl\_5\_phosphomethylpyrimidine\_biosynthesis\_(yeast)\_g\_Bacteroid  
PWY\_7282\_\_4\_amino\_2\_methyl\_5\_phosphomethylpyrimidine\_biosynthesis\_(yeast)\_g\_Bacteroid

PWY\_7282\_\_4\_amino\_2\_methyl\_5\_phosphomethylpyrimidine\_biosynthesis\_(yeast)\_g\_\_Bacteroid  
PWY\_7282\_\_4\_amino\_2\_methyl\_5\_phosphomethylpyrimidine\_biosynthesis\_(yeast)\_g\_\_Bacteroid  
PWY\_7282\_\_4\_amino\_2\_methyl\_5\_phosphomethylpyrimidine\_biosynthesis\_(yeast)\_g\_\_Bacteroid  
PWY\_7282\_\_4\_amino\_2\_methyl\_5\_phosphomethylpyrimidine\_biosynthesis\_(yeast)\_g\_\_Bacteroid  
PWY\_7282\_\_4\_amino\_2\_methyl\_5\_phosphomethylpyrimidine\_biosynthesis\_(yeast)\_g\_\_Citrobacter  
PWY\_7283\_\_wybutosine\_biosynthesis  
PWY\_7288\_\_fatty\_acid\_&beta\_oxidation\_(peroxisome,\_yeast)  
PWY\_7288\_\_fatty\_acid\_&beta\_oxidation\_(peroxisome,\_yeast)\_unclassified  
PWY\_7294\_\_xylose\_degradation\_IV  
PWY\_7315\_\_dTDP\_N\_acetylthomosamine\_biosynthesis\_g\_\_Citrobacter\_s\_\_Citrobacter\_freundii  
PWY\_7315\_\_dTDP\_N\_acetylthomosamine\_biosynthesis\_unclassified  
PWY\_7323\_\_superpathway\_of\_GDP\_mannose\_derived\_O\_antigen\_building\_blocks\_biosynthesis\_  
PWY\_7323\_\_superpathway\_of\_GDP\_mannose\_derived\_O\_antigen\_building\_blocks\_biosynthesis\_  
PWY\_7323\_\_superpathway\_of\_GDP\_mannose\_derived\_O\_antigen\_building\_blocks\_biosynthesis\_  
PWY\_7323\_\_superpathway\_of\_GDP\_mannose\_derived\_O\_antigen\_building\_blocks\_biosynthesis\_  
PWY\_7323\_\_superpathway\_of\_GDP\_mannose\_derived\_O\_antigen\_building\_blocks\_biosynthesis\_  
PWY\_7323\_\_superpathway\_of\_GDP\_mannose\_derived\_O\_antigen\_building\_blocks\_biosynthesis\_  
PWY\_7323\_\_superpathway\_of\_GDP\_mannose\_derived\_O\_antigen\_building\_blocks\_biosynthesis\_  
PWY\_7345\_\_superpathway\_of\_anaerobic\_sucrose\_degradation  
PWY\_7345\_\_superpathway\_of\_anaerobic\_sucrose\_degradation\_unclassified  
PWY\_7357\_\_thiamin\_formation\_from\_pyriothiamine\_and\_oxythiamine\_(yeast)\_g\_\_Anaerofustis\_s\_  
PWY\_7357\_\_thiamin\_formation\_from\_pyriothiamine\_and\_oxythiamine\_(yeast)\_g\_\_Anaerotruncus\_  
PWY\_7357\_\_thiamin\_formation\_from\_pyriothiamine\_and\_oxythiamine\_(yeast)\_g\_\_Bifidobacterium\_  
PWY\_7357\_\_thiamin\_formation\_from\_pyriothiamine\_and\_oxythiamine\_(yeast)\_g\_\_Blautia\_s\_\_Rur  
PWY\_7357\_\_thiamin\_formation\_from\_pyriothiamine\_and\_oxythiamine\_(yeast)\_g\_\_Citrobacter\_s\_  
PWY\_7357\_\_thiamin\_formation\_from\_pyriothiamine\_and\_oxythiamine\_(yeast)\_g\_\_Clostridium\_s\_  
PWY\_7357\_\_thiamin\_formation\_from\_pyriothiamine\_and\_oxythiamine\_(yeast)\_g\_\_Coprococcus\_s\_  
PWY\_7357\_\_thiamin\_formation\_from\_pyriothiamine\_and\_oxythiamine\_(yeast)\_g\_\_Enterococcus\_s\_  
PWY\_7357\_\_thiamin\_formation\_from\_pyriothiamine\_and\_oxythiamine\_(yeast)\_g\_\_Erysipelotricha  
PWY\_7357\_\_thiamin\_formation\_from\_pyriothiamine\_and\_oxythiamine\_(yeast)\_g\_\_Erysipelotricha  
PWY\_7357\_\_thiamin\_formation\_from\_pyriothiamine\_and\_oxythiamine\_(yeast)\_g\_\_Eubacterium\_s\_  
PWY\_7357\_\_thiamin\_formation\_from\_pyriothiamine\_and\_oxythiamine\_(yeast)\_g\_\_Fusobacterium\_  
PWY\_7357\_\_thiamin\_formation\_from\_pyriothiamine\_and\_oxythiamine\_(yeast)\_g\_\_Klebsiella\_s\_\_K  
PWY\_7357\_\_thiamin\_formation\_from\_pyriothiamine\_and\_oxythiamine\_(yeast)\_g\_\_Lachnospiracea  
PWY\_7357\_\_thiamin\_formation\_from\_pyriothiamine\_and\_oxythiamine\_(yeast)\_g\_\_Pediococcus\_s\_  
PWY\_7357\_\_thiamin\_formation\_from\_pyriothiamine\_and\_oxythiamine\_(yeast)\_g\_\_Pediococcus\_s\_  
PWY\_7357\_\_thiamin\_formation\_from\_pyriothiamine\_and\_oxythiamine\_(yeast)\_g\_\_Phascolarctoba  
PWY\_7357\_\_thiamin\_formation\_from\_pyriothiamine\_and\_oxythiamine\_(yeast)\_g\_\_Propionibacteri  
PWY\_7357\_\_thiamin\_formation\_from\_pyriothiamine\_and\_oxythiamine\_(yeast)\_g\_\_Roseburia\_s\_\_I  
PWY\_7357\_\_thiamin\_formation\_from\_pyriothiamine\_and\_oxythiamine\_(yeast)\_g\_\_Roseburia\_s\_\_I  
PWY\_7357\_\_thiamin\_formation\_from\_pyriothiamine\_and\_oxythiamine\_(yeast)\_g\_\_Ruminococcus\_  
PWY\_7357\_\_thiamin\_formation\_from\_pyriothiamine\_and\_oxythiamine\_(yeast)\_g\_\_Streptococcus\_  
PWY\_7371\_\_1,4\_dihydroxy\_6\_naphthoate\_biosynthesis\_II  
PWY\_7371\_\_1,4\_dihydroxy\_6\_naphthoate\_biosynthesis\_II\_g\_\_Alistipes\_s\_\_Alistipes\_finegoldii  
PWY\_7371\_\_1,4\_dihydroxy\_6\_naphthoate\_biosynthesis\_II\_g\_\_Alistipes\_s\_\_Alistipes\_sp\_HGB5  
PWY\_7371\_\_1,4\_dihydroxy\_6\_naphthoate\_biosynthesis\_II\_unclassified  
PWY\_7374\_\_1,4\_dihydroxy\_6\_naphthoate\_biosynthesis\_I  
PWY\_7374\_\_1,4\_dihydroxy\_6\_naphthoate\_biosynthesis\_I\_unclassified

PWY\_7384\_\_anaerobic\_energy\_metabolism\_(invertebrates,\_mitochondrial)

PWY\_7385\_\_1,3\_propanediol\_biosynthesis\_(engineered)

PWY\_7388\_\_octanoyl\_[acyl\_carrier\_protein]\_biosynthesis\_(mitochondria,\_yeast)\_g\_Bacteroides

PWY\_7388\_\_octanoyl\_[acyl\_carrier\_protein]\_biosynthesis\_(mitochondria,\_yeast)\_g\_Bacteroides

PWY\_7388\_\_octanoyl\_[acyl\_carrier\_protein]\_biosynthesis\_(mitochondria,\_yeast)\_g\_Citrobacter

PWY\_7388\_\_octanoyl\_[acyl\_carrier\_protein]\_biosynthesis\_(mitochondria,\_yeast)\_g\_Haemophilu

PWY\_7388\_\_octanoyl\_[acyl\_carrier\_protein]\_biosynthesis\_(mitochondria,\_yeast)\_g\_Klebsiella\_s

PWY\_7389\_\_superpathway\_of\_anaerobic\_energy\_metabolism\_(invertebrates)

PWY\_7399\_\_methylphosphonate\_degradation\_II

PWY\_7400\_\_L\_arginine\_biosynthesis\_IV\_(archaeobacteria)\_g\_Burkholderiales\_noname\_s\_Burkh

PWY\_7400\_\_L\_arginine\_biosynthesis\_IV\_(archaeobacteria)\_g\_Coprococcus\_s\_Coprococcus\_catus

PWY\_7400\_\_L\_arginine\_biosynthesis\_IV\_(archaeobacteria)\_g\_Eubacterium\_s\_Eubacterium\_sirae

PWY\_7400\_\_L\_arginine\_biosynthesis\_IV\_(archaeobacteria)\_g\_Lactococcus\_s\_Lactococcus\_lactis

PWY\_7400\_\_L\_arginine\_biosynthesis\_IV\_(archaeobacteria)\_g\_Oxalobacter\_s\_Oxalobacter\_formiq

PWY\_7400\_\_L\_arginine\_biosynthesis\_IV\_(archaeobacteria)\_g\_Parasutterella\_s\_Parasutterella\_ex

PWY\_7400\_\_L\_arginine\_biosynthesis\_IV\_(archaeobacteria)\_g\_Ruminococcus\_s\_Ruminococcus\_cl

PWY\_7400\_\_L\_arginine\_biosynthesis\_IV\_(archaeobacteria)\_g\_Veillonella\_s\_Veillonella\_dispar

PWY\_7400\_\_L\_arginine\_biosynthesis\_IV\_(archaeobacteria)\_g\_Veillonella\_s\_Veillonella\_parvula

PWY\_7409\_\_phospholipid\_remodeling\_(phosphatidylethanolamine,\_yeast)\_unclassified

PWY\_7431\_\_aromatic\_biogenic\_amine\_degradation\_(bacteria)

PWY\_7446\_\_sulfoglycolysis\_g\_Citrobacter\_s\_Citrobacter\_freundii

PWY\_7446\_\_sulfoglycolysis\_unclassified

PWY\_7456\_\_mannan\_degradation\_g\_Bacteroides\_s\_Bacteroides\_ovatus

PWY\_7456\_\_mannan\_degradation\_g\_Coprococcus\_s\_Coprococcus\_eutactus

PWY\_7456\_\_mannan\_degradation\_g\_Coprococcus\_s\_Coprococcus\_sp\_ART55\_1

PWY\_7456\_\_mannan\_degradation\_g\_Eubacterium\_s\_Eubacterium\_siraeum

PWY\_7456\_\_mannan\_degradation\_unclassified

PWY\_7527\_\_L\_methionine\_salvage\_cycle\_III

PWY\_7527\_\_L\_methionine\_salvage\_cycle\_III\_unclassified

PWY\_7539\_\_6\_hydroxymethyl\_dihydropterin\_diphosphate\_biosynthesis\_III\_(Chlamydia)\_g\_Bact

PWY\_7539\_\_6\_hydroxymethyl\_dihydropterin\_diphosphate\_biosynthesis\_III\_(Chlamydia)\_g\_Bact

PWY\_7539\_\_6\_hydroxymethyl\_dihydropterin\_diphosphate\_biosynthesis\_III\_(Chlamydia)\_g\_Bact

PWY\_7539\_\_6\_hydroxymethyl\_dihydropterin\_diphosphate\_biosynthesis\_III\_(Chlamydia)\_g\_Bact

PWY\_7539\_\_6\_hydroxymethyl\_dihydropterin\_diphosphate\_biosynthesis\_III\_(Chlamydia)\_g\_Bact

PWY\_7539\_\_6\_hydroxymethyl\_dihydropterin\_diphosphate\_biosynthesis\_III\_(Chlamydia)\_g\_Bact

PWY\_7539\_\_6\_hydroxymethyl\_dihydropterin\_diphosphate\_biosynthesis\_III\_(Chlamydia)\_g\_Citro

PWY\_7560\_\_methylerythritol\_phosphate\_pathway\_II\_g\_Citrobacter\_s\_Citrobacter\_freundii

PWY\_7560\_\_methylerythritol\_phosphate\_pathway\_II\_g\_Klebsiella\_s\_Klebsiella\_pneumoniae

PWY\_7560\_\_methylerythritol\_phosphate\_pathway\_II\_g\_Phascolarctobacterium\_s\_Phascolarcto

PWY\_7663\_\_gondoate\_biosynthesis\_(anaerobic)\_g\_Bacteroides\_s\_Bacteroides\_eggerthii

PWY\_7663\_\_gondoate\_biosynthesis\_(anaerobic)\_g\_Bacteroides\_s\_Bacteroides\_faecis

PWY\_7663\_\_gondoate\_biosynthesis\_(anaerobic)\_g\_Bacteroides\_s\_Bacteroides\_finegoldii

PWY\_7663\_\_gondoate\_biosynthesis\_(anaerobic)\_g\_Bacteroides\_s\_Bacteroides\_ovatus

PWY\_7663\_\_gondoate\_biosynthesis\_(anaerobic)\_g\_Bacteroides\_s\_Bacteroides\_salyersiae

PWY\_7663\_\_gondoate\_biosynthesis\_(anaerobic)\_g\_Bacteroides\_s\_Bacteroides\_sp\_1\_1\_30

PWY\_7663\_\_gondoate\_biosynthesis\_(anaerobic)\_g\_Bacteroides\_s\_Bacteroides\_sp\_1\_1\_6

PWY\_7663\_\_gondoate\_biosynthesis\_(anaerobic)\_g\_Bacteroides\_s\_Bacteroides\_sp\_2\_1\_22

PWY\_7663\_gondoate\_biosynthesis\_(anaerobic)\_g\_Bacteroides\_s\_Bacteroides\_sp\_2\_2\_4  
 PWY\_7663\_gondoate\_biosynthesis\_(anaerobic)\_g\_Bacteroides\_s\_Bacteroides\_sp\_3\_1\_23  
 PWY\_7663\_gondoate\_biosynthesis\_(anaerobic)\_g\_Bacteroides\_s\_Bacteroides\_stercoris  
 PWY\_7663\_gondoate\_biosynthesis\_(anaerobic)\_g\_Bacteroides\_s\_Bacteroides\_thetaiotaomicr  
 PWY\_7663\_gondoate\_biosynthesis\_(anaerobic)\_g\_Bacteroides\_s\_Bacteroides\_xylanisolvens  
 PWY\_7663\_gondoate\_biosynthesis\_(anaerobic)\_g\_Citrobacter\_s\_Citrobacter\_freundii  
 PWY\_7663\_gondoate\_biosynthesis\_(anaerobic)\_g\_Enterobacter\_s\_Enterobacter\_cloacae  
 PWY\_7663\_gondoate\_biosynthesis\_(anaerobic)\_g\_Klebsiella\_s\_Klebsiella\_pneumoniae  
 PWY\_7663\_gondoate\_biosynthesis\_(anaerobic)\_g\_Lactococcus\_s\_Lactococcus\_lactis  
 PWY\_7663\_gondoate\_biosynthesis\_(anaerobic)\_g\_Odoribacter\_s\_Odoribacter\_splanchnicus  
 PWY\_7664\_oleate\_biosynthesis\_IV\_(anaerobic)\_g\_Bacteroides\_s\_Bacteroides\_sp\_2\_2\_4  
 PWY\_7664\_oleate\_biosynthesis\_IV\_(anaerobic)\_g\_Bacteroides\_s\_Bacteroides\_xylanisolvens  
 PWY\_7664\_oleate\_biosynthesis\_IV\_(anaerobic)\_g\_Citrobacter\_s\_Citrobacter\_freundii  
 PWY\_7664\_oleate\_biosynthesis\_IV\_(anaerobic)\_g\_Enterobacter\_s\_Enterobacter\_cloacae  
 PWY\_7664\_oleate\_biosynthesis\_IV\_(anaerobic)\_g\_Haemophilus\_s\_Haemophilus\_parainfluenz  
 PWY\_7664\_oleate\_biosynthesis\_IV\_(anaerobic)\_g\_Klebsiella\_s\_Klebsiella\_pneumoniae  
 PWY\_922\_mevalonate\_pathway\_I\_g\_Lactococcus\_s\_Lactococcus\_lactis  
 PWY0\_1061\_superpathway\_of\_L\_alanine\_biosynthesis\_g\_Citrobacter\_s\_Citrobacter\_freundii  
 PWY0\_1061\_superpathway\_of\_L\_alanine\_biosynthesis\_g\_Enterococcus\_s\_Enterococcus\_durar  
 PWY0\_1061\_superpathway\_of\_L\_alanine\_biosynthesis\_g\_Enterococcus\_s\_Enterococcus\_faeci  
 PWY0\_1061\_superpathway\_of\_L\_alanine\_biosynthesis\_g\_Klebsiella\_s\_Klebsiella\_pneumoniae  
 PWY0\_1061\_superpathway\_of\_L\_alanine\_biosynthesis\_g\_Streptococcus\_s\_Streptococcus\_miti  
 PWY0\_1061\_superpathway\_of\_L\_alanine\_biosynthesis\_g\_Streptococcus\_s\_Streptococcus\_san  
 PWY0\_1241\_ADP\_L\_glycero\_&beta\_D\_manno\_heptose\_biosynthesis\_g\_Citrobacter\_s\_Citrob  
 PWY0\_1241\_ADP\_L\_glycero\_&beta\_D\_manno\_heptose\_biosynthesis\_g\_Enterobacter\_s\_En  
 PWY0\_1277\_3\_phenylpropanoate\_and\_3\_(3\_hydroxyphenyl)propanoate\_degradation\_g\_Citrob  
 PWY0\_1277\_3\_phenylpropanoate\_and\_3\_(3\_hydroxyphenyl)propanoate\_degradation\_g\_Klebsi  
 PWY0\_1296\_purine\_ribonucleosides\_degradation\_g\_Anaerotruncus\_s\_Anaerotruncus\_colihon  
 PWY0\_1296\_purine\_ribonucleosides\_degradation\_g\_Blautia\_s\_Blautia\_sp\_KLE\_1732  
 PWY0\_1296\_purine\_ribonucleosides\_degradation\_g\_Blautia\_s\_Ruminococcus\_gnavus  
 PWY0\_1296\_purine\_ribonucleosides\_degradation\_g\_Blautia\_s\_Ruminococcus\_obeum  
 PWY0\_1296\_purine\_ribonucleosides\_degradation\_g\_Butyrvibrio\_s\_Butyrvibrio\_crossotus  
 PWY0\_1296\_purine\_ribonucleosides\_degradation\_g\_Catenibacterium\_s\_Catenibacterium\_mit  
 PWY0\_1296\_purine\_ribonucleosides\_degradation\_g\_Citrobacter\_s\_Citrobacter\_freundii  
 PWY0\_1296\_purine\_ribonucleosides\_degradation\_g\_Clostridiales\_noname\_s\_Bacteroides\_pec  
 PWY0\_1296\_purine\_ribonucleosides\_degradation\_g\_Clostridiales\_noname\_s\_Clostridiales\_ba  
 PWY0\_1296\_purine\_ribonucleosides\_degradation\_g\_Clostridium\_s\_Clostridium\_asparagiforme  
 PWY0\_1296\_purine\_ribonucleosides\_degradation\_g\_Clostridium\_s\_Clostridium\_bolteae  
 PWY0\_1296\_purine\_ribonucleosides\_degradation\_g\_Clostridium\_s\_Clostridium\_citroniae  
 PWY0\_1296\_purine\_ribonucleosides\_degradation\_g\_Clostridium\_s\_Clostridium\_clostridioform  
 PWY0\_1296\_purine\_ribonucleosides\_degradation\_g\_Clostridium\_s\_Clostridium\_hathewayi  
 PWY0\_1296\_purine\_ribonucleosides\_degradation\_g\_Clostridium\_s\_Clostridium\_leptum  
 PWY0\_1296\_purine\_ribonucleosides\_degradation\_g\_Clostridium\_s\_Clostridium\_perfringens  
 PWY0\_1296\_purine\_ribonucleosides\_degradation\_g\_Collinsella\_s\_Collinsella\_intestinalis  
 PWY0\_1296\_purine\_ribonucleosides\_degradation\_g\_Collinsella\_s\_Collinsella\_tanakaei  
 PWY0\_1296\_purine\_ribonucleosides\_degradation\_g\_Coprococcus\_s\_Coprococcus\_catus  
 PWY0\_1296\_purine\_ribonucleosides\_degradation\_g\_Dorea\_s\_Dorea\_formicigenerans

PWY0\_1296\_\_purine\_ribonucleosides\_degradation\_g\_Enterobacter\_s\_Enterobacter\_cloacae  
 PWY0\_1296\_\_purine\_ribonucleosides\_degradation\_g\_Enterococcus\_s\_Enterococcus\_durans  
 PWY0\_1296\_\_purine\_ribonucleosides\_degradation\_g\_Erysipelotrichaceae\_noname\_s\_Clostridiu  
 PWY0\_1296\_\_purine\_ribonucleosides\_degradation\_g\_Erysipelotrichaceae\_noname\_s\_Erysipelo  
 PWY0\_1296\_\_purine\_ribonucleosides\_degradation\_g\_Erysipelotrichaceae\_noname\_s\_Erysipelo  
 PWY0\_1296\_\_purine\_ribonucleosides\_degradation\_g\_Erysipelotrichaceae\_noname\_s\_Eubacteri  
 PWY0\_1296\_\_purine\_ribonucleosides\_degradation\_g\_Erysipelotrichaceae\_noname\_s\_Eubacteri  
 PWY0\_1296\_\_purine\_ribonucleosides\_degradation\_g\_Eubacterium\_s\_Eubacterium\_eligens  
 PWY0\_1296\_\_purine\_ribonucleosides\_degradation\_g\_Eubacterium\_s\_Eubacterium\_ramulus  
 PWY0\_1296\_\_purine\_ribonucleosides\_degradation\_g\_Eubacterium\_s\_Eubacterium\_sp\_3\_1\_31  
 PWY0\_1296\_\_purine\_ribonucleosides\_degradation\_g\_Eubacterium\_s\_Eubacterium\_ventriosum  
 PWY0\_1296\_\_purine\_ribonucleosides\_degradation\_g\_Holdemania\_s\_Holdemania\_filiformis  
 PWY0\_1296\_\_purine\_ribonucleosides\_degradation\_g\_Klebsiella\_s\_Klebsiella\_pneumoniae  
 PWY0\_1296\_\_purine\_ribonucleosides\_degradation\_g\_Lachnospiraceae\_noname\_s\_Lachnospira  
 PWY0\_1296\_\_purine\_ribonucleosides\_degradation\_g\_Lachnospiraceae\_noname\_s\_Lachnospira  
 PWY0\_1296\_\_purine\_ribonucleosides\_degradation\_g\_Lachnospiraceae\_noname\_s\_Lachnospira  
 PWY0\_1296\_\_purine\_ribonucleosides\_degradation\_g\_Lachnospiraceae\_noname\_s\_Lachnospira  
 PWY0\_1296\_\_purine\_ribonucleosides\_degradation\_g\_Lachnospiraceae\_noname\_s\_Lachnospira  
 PWY0\_1296\_\_purine\_ribonucleosides\_degradation\_g\_Lachnospiraceae\_noname\_s\_Lachnospira  
 PWY0\_1296\_\_purine\_ribonucleosides\_degradation\_g\_Lactobacillus\_s\_Lactobacillus\_casei\_parac  
 PWY0\_1296\_\_purine\_ribonucleosides\_degradation\_g\_Pediococcus\_s\_Pediococcus\_acidilactici  
 PWY0\_1296\_\_purine\_ribonucleosides\_degradation\_g\_Peptostreptococcaceae\_noname\_s\_Clostr  
 PWY0\_1296\_\_purine\_ribonucleosides\_degradation\_g\_Roseburia\_s\_Roseburia\_hominis  
 PWY0\_1296\_\_purine\_ribonucleosides\_degradation\_g\_Roseburia\_s\_Roseburia\_inulinivorans  
 PWY0\_1296\_\_purine\_ribonucleosides\_degradation\_g\_Streptococcus\_s\_Streptococcus\_australis  
 PWY0\_1296\_\_purine\_ribonucleosides\_degradation\_g\_Streptococcus\_s\_Streptococcus\_mitis\_oro  
 PWY0\_1296\_\_purine\_ribonucleosides\_degradation\_g\_Streptococcus\_s\_Streptococcus\_sanguinis  
 PWY0\_1296\_\_purine\_ribonucleosides\_degradation\_g\_Subdoligranulum\_s\_Subdoligranulum\_sp.  
 PWY0\_1297\_\_superpathway\_of\_purine\_deoxyribonucleosides\_degradation\_g\_Anaerotruncus\_s\_  
 PWY0\_1297\_\_superpathway\_of\_purine\_deoxyribonucleosides\_degradation\_g\_Blautia\_s\_Rumin  
 PWY0\_1297\_\_superpathway\_of\_purine\_deoxyribonucleosides\_degradation\_g\_Citrobacter\_s\_Ci  
 PWY0\_1297\_\_superpathway\_of\_purine\_deoxyribonucleosides\_degradation\_g\_Clostridiales\_nona  
 PWY0\_1297\_\_superpathway\_of\_purine\_deoxyribonucleosides\_degradation\_g\_Clostridium\_s\_Cl  
 PWY0\_1297\_\_superpathway\_of\_purine\_deoxyribonucleosides\_degradation\_g\_Clostridium\_s\_Cl  
 PWY0\_1297\_\_superpathway\_of\_purine\_deoxyribonucleosides\_degradation\_g\_Enterobacter\_s\_|  
 PWY0\_1297\_\_superpathway\_of\_purine\_deoxyribonucleosides\_degradation\_g\_Holdemania\_s\_H  
 PWY0\_1297\_\_superpathway\_of\_purine\_deoxyribonucleosides\_degradation\_g\_Klebsiella\_s\_Klek  
 PWY0\_1297\_\_superpathway\_of\_purine\_deoxyribonucleosides\_degradation\_g\_Lachnospiraceae\_  
 PWY0\_1297\_\_superpathway\_of\_purine\_deoxyribonucleosides\_degradation\_g\_Lactobacillus\_s\_|  
 PWY0\_1297\_\_superpathway\_of\_purine\_deoxyribonucleosides\_degradation\_g\_Streptococcus\_s\_  
 PWY0\_1298\_\_superpathway\_of\_pyrimidine\_deoxyribonucleosides\_degradation\_g\_Anaerostipes\_  
 PWY0\_1298\_\_superpathway\_of\_pyrimidine\_deoxyribonucleosides\_degradation\_g\_Clostridium\_s  
 PWY0\_1298\_\_superpathway\_of\_pyrimidine\_deoxyribonucleosides\_degradation\_g\_Lachnospirace  
 PWY0\_1298\_\_superpathway\_of\_pyrimidine\_deoxyribonucleosides\_degradation\_g\_Streptococcus  
 PWY0\_1319\_\_CDP\_diacylglycerol\_biosynthesis\_II\_g\_Alistipes\_s\_Alistipes\_finegoldii  
 PWY0\_1319\_\_CDP\_diacylglycerol\_biosynthesis\_II\_g\_Alistipes\_s\_Alistipes\_indistinctus  
 PWY0\_1319\_\_CDP\_diacylglycerol\_biosynthesis\_II\_g\_Alistipes\_s\_Alistipes\_sp\_HGB5



PWYO\_1319\_\_CDP\_diacylglycerol\_biosynthesis\_II\_g\_\_Anaerostipes\_s\_\_Anaerostipes\_hadrus  
PWYO\_1319\_\_CDP\_diacylglycerol\_biosynthesis\_II\_g\_\_Bacteroides\_s\_\_Bacteroides\_cellulosilyticus  
PWYO\_1319\_\_CDP\_diacylglycerol\_biosynthesis\_II\_g\_\_Bacteroides\_s\_\_Bacteroides\_clarus  
PWYO\_1319\_\_CDP\_diacylglycerol\_biosynthesis\_II\_g\_\_Bacteroides\_s\_\_Bacteroides\_coprocola  
PWYO\_1319\_\_CDP\_diacylglycerol\_biosynthesis\_II\_g\_\_Bacteroides\_s\_\_Bacteroides\_eggerthii  
PWYO\_1319\_\_CDP\_diacylglycerol\_biosynthesis\_II\_g\_\_Bacteroides\_s\_\_Bacteroides\_faecis  
PWYO\_1319\_\_CDP\_diacylglycerol\_biosynthesis\_II\_g\_\_Bacteroides\_s\_\_Bacteroides\_finegoldii  
PWYO\_1319\_\_CDP\_diacylglycerol\_biosynthesis\_II\_g\_\_Bacteroides\_s\_\_Bacteroides\_intestinalis  
PWYO\_1319\_\_CDP\_diacylglycerol\_biosynthesis\_II\_g\_\_Bacteroides\_s\_\_Bacteroides\_ovatus  
PWYO\_1319\_\_CDP\_diacylglycerol\_biosynthesis\_II\_g\_\_Bacteroides\_s\_\_Bacteroides\_plebeius  
PWYO\_1319\_\_CDP\_diacylglycerol\_biosynthesis\_II\_g\_\_Bacteroides\_s\_\_Bacteroides\_salyersiae  
PWYO\_1319\_\_CDP\_diacylglycerol\_biosynthesis\_II\_g\_\_Bacteroides\_s\_\_Bacteroides\_sp\_1\_1\_30  
PWYO\_1319\_\_CDP\_diacylglycerol\_biosynthesis\_II\_g\_\_Bacteroides\_s\_\_Bacteroides\_sp\_1\_1\_6  
PWYO\_1319\_\_CDP\_diacylglycerol\_biosynthesis\_II\_g\_\_Bacteroides\_s\_\_Bacteroides\_sp\_2\_1\_22  
PWYO\_1319\_\_CDP\_diacylglycerol\_biosynthesis\_II\_g\_\_Bacteroides\_s\_\_Bacteroides\_sp\_2\_2\_4  
PWYO\_1319\_\_CDP\_diacylglycerol\_biosynthesis\_II\_g\_\_Bacteroides\_s\_\_Bacteroides\_sp\_3\_1\_19  
PWYO\_1319\_\_CDP\_diacylglycerol\_biosynthesis\_II\_g\_\_Bacteroides\_s\_\_Bacteroides\_sp\_3\_1\_23  
PWYO\_1319\_\_CDP\_diacylglycerol\_biosynthesis\_II\_g\_\_Bacteroides\_s\_\_Bacteroides\_sp\_D20  
PWYO\_1319\_\_CDP\_diacylglycerol\_biosynthesis\_II\_g\_\_Bacteroides\_s\_\_Bacteroides\_stercoris  
PWYO\_1319\_\_CDP\_diacylglycerol\_biosynthesis\_II\_g\_\_Bacteroides\_s\_\_Bacteroides\_thetaiotaomicr  
PWYO\_1319\_\_CDP\_diacylglycerol\_biosynthesis\_II\_g\_\_Bacteroides\_s\_\_Bacteroides\_uniformis  
PWYO\_1319\_\_CDP\_diacylglycerol\_biosynthesis\_II\_g\_\_Bacteroides\_s\_\_Bacteroides\_xylanisolvens  
PWYO\_1319\_\_CDP\_diacylglycerol\_biosynthesis\_II\_g\_\_Barnesiella\_s\_\_Barnesiella\_intestinihominis  
PWYO\_1319\_\_CDP\_diacylglycerol\_biosynthesis\_II\_g\_\_Blautia\_s\_\_Blautia\_hydrogenotrophica  
PWYO\_1319\_\_CDP\_diacylglycerol\_biosynthesis\_II\_g\_\_Blautia\_s\_\_Ruminococcus\_gnavus  
PWYO\_1319\_\_CDP\_diacylglycerol\_biosynthesis\_II\_g\_\_Blautia\_s\_\_Ruminococcus\_obeum  
PWYO\_1319\_\_CDP\_diacylglycerol\_biosynthesis\_II\_g\_\_Butyrivibrio\_s\_\_Butyrivibrio\_crossotus  
PWYO\_1319\_\_CDP\_diacylglycerol\_biosynthesis\_II\_g\_\_Citrobacter\_s\_\_Citrobacter\_freundii  
PWYO\_1319\_\_CDP\_diacylglycerol\_biosynthesis\_II\_g\_\_Clostridiales\_noname\_s\_\_Clostridiales\_bact  
PWYO\_1319\_\_CDP\_diacylglycerol\_biosynthesis\_II\_g\_\_Clostridium\_s\_\_Clostridium\_asparagiforme  
PWYO\_1319\_\_CDP\_diacylglycerol\_biosynthesis\_II\_g\_\_Clostridium\_s\_\_Clostridium\_bolteae  
PWYO\_1319\_\_CDP\_diacylglycerol\_biosynthesis\_II\_g\_\_Clostridium\_s\_\_Clostridium\_clostridioforme  
PWYO\_1319\_\_CDP\_diacylglycerol\_biosynthesis\_II\_g\_\_Clostridium\_s\_\_Clostridium\_hathewayi  
PWYO\_1319\_\_CDP\_diacylglycerol\_biosynthesis\_II\_g\_\_Clostridium\_s\_\_Clostridium\_leptum  
PWYO\_1319\_\_CDP\_diacylglycerol\_biosynthesis\_II\_g\_\_Clostridium\_s\_\_Clostridium\_sp\_L2\_50  
PWYO\_1319\_\_CDP\_diacylglycerol\_biosynthesis\_II\_g\_\_Clostridium\_s\_\_Clostridium\_sp\_SS2\_1  
PWYO\_1319\_\_CDP\_diacylglycerol\_biosynthesis\_II\_g\_\_Coprobacter\_s\_\_Coprobacter\_fastidiosus  
PWYO\_1319\_\_CDP\_diacylglycerol\_biosynthesis\_II\_g\_\_Coprococcus\_s\_\_Coprococcus\_eutactus  
PWYO\_1319\_\_CDP\_diacylglycerol\_biosynthesis\_II\_g\_\_Dialister\_s\_\_Dialister\_invisus  
PWYO\_1319\_\_CDP\_diacylglycerol\_biosynthesis\_II\_g\_\_Dorea\_s\_\_Dorea\_formicigenerans  
PWYO\_1319\_\_CDP\_diacylglycerol\_biosynthesis\_II\_g\_\_Dorea\_s\_\_Dorea\_longicatena  
PWYO\_1319\_\_CDP\_diacylglycerol\_biosynthesis\_II\_g\_\_Enterobacter\_s\_\_Enterobacter\_cloacae  
PWYO\_1319\_\_CDP\_diacylglycerol\_biosynthesis\_II\_g\_\_Erysipelotrichaceae\_noname\_s\_\_Clostridium  
PWYO\_1319\_\_CDP\_diacylglycerol\_biosynthesis\_II\_g\_\_Eubacterium\_s\_\_Eubacterium\_eligens  
PWYO\_1319\_\_CDP\_diacylglycerol\_biosynthesis\_II\_g\_\_Eubacterium\_s\_\_Eubacterium\_hallii  
PWYO\_1319\_\_CDP\_diacylglycerol\_biosynthesis\_II\_g\_\_Eubacterium\_s\_\_Eubacterium\_ramulus  
PWYO\_1319\_\_CDP\_diacylglycerol\_biosynthesis\_II\_g\_\_Eubacterium\_s\_\_Eubacterium\_siraeum

PWYO\_1319\_\_CDP\_diacylglycerol\_biosynthesis\_II\_g\_Eubacterium\_s\_Eubacterium\_ventriosum  
PWYO\_1319\_\_CDP\_diacylglycerol\_biosynthesis\_II\_g\_Gordonibacter\_s\_Gordonibacter\_pamelaea  
PWYO\_1319\_\_CDP\_diacylglycerol\_biosynthesis\_II\_g\_Klebsiella\_s\_Klebsiella\_pneumoniae  
PWYO\_1319\_\_CDP\_diacylglycerol\_biosynthesis\_II\_g\_Lachnospiraceae\_noname\_s\_Lachnospirace  
PWYO\_1319\_\_CDP\_diacylglycerol\_biosynthesis\_II\_g\_Lachnospiraceae\_noname\_s\_Lachnospirace  
PWYO\_1319\_\_CDP\_diacylglycerol\_biosynthesis\_II\_g\_Lachnospiraceae\_noname\_s\_Lachnospirace  
PWYO\_1319\_\_CDP\_diacylglycerol\_biosynthesis\_II\_g\_Lachnospiraceae\_noname\_s\_Lachnospirace  
PWYO\_1319\_\_CDP\_diacylglycerol\_biosynthesis\_II\_g\_Lachnospiraceae\_noname\_s\_Lachnospirace  
PWYO\_1319\_\_CDP\_diacylglycerol\_biosynthesis\_II\_g\_Lachnospiraceae\_noname\_s\_Lachnospirace  
PWYO\_1319\_\_CDP\_diacylglycerol\_biosynthesis\_II\_g\_Lachnospiraceae\_noname\_s\_Lachnospirace  
PWYO\_1319\_\_CDP\_diacylglycerol\_biosynthesis\_II\_g\_Oxalobacter\_s\_Oxalobacter\_formigenes  
PWYO\_1319\_\_CDP\_diacylglycerol\_biosynthesis\_II\_g\_Parabacteroides\_s\_Parabacteroides\_distas  
PWYO\_1319\_\_CDP\_diacylglycerol\_biosynthesis\_II\_g\_Parabacteroides\_s\_Parabacteroides\_johnsc  
PWYO\_1319\_\_CDP\_diacylglycerol\_biosynthesis\_II\_g\_Parabacteroides\_s\_Parabacteroides\_merda  
PWYO\_1319\_\_CDP\_diacylglycerol\_biosynthesis\_II\_g\_Parabacteroides\_s\_Parabacteroides\_sp\_D1  
PWYO\_1319\_\_CDP\_diacylglycerol\_biosynthesis\_II\_g\_Paraprevotella\_s\_Paraprevotella\_clara  
PWYO\_1319\_\_CDP\_diacylglycerol\_biosynthesis\_II\_g\_Peptostreptococcaceae\_noname\_s\_Clostric  
PWYO\_1319\_\_CDP\_diacylglycerol\_biosynthesis\_II\_g\_Propionibacterium\_s\_Propionibacterium\_fr  
PWYO\_1319\_\_CDP\_diacylglycerol\_biosynthesis\_II\_g\_Roseburia\_s\_Roseburia\_hominis  
PWYO\_1319\_\_CDP\_diacylglycerol\_biosynthesis\_II\_g\_Roseburia\_s\_Roseburia\_inulinivorans  
PWYO\_1319\_\_CDP\_diacylglycerol\_biosynthesis\_II\_g\_Ruminococcus\_s\_Ruminococcus\_champane  
PWYO\_1319\_\_CDP\_diacylglycerol\_biosynthesis\_II\_g\_Ruminococcus\_s\_Ruminococcus\_sp  
PWYO\_1319\_\_CDP\_diacylglycerol\_biosynthesis\_II\_g\_Streptococcus\_s\_Streptococcus\_mitis\_orali  
PWYO\_1319\_\_CDP\_diacylglycerol\_biosynthesis\_II\_g\_Subdoligranulum\_s\_Subdoligranulum\_sp\_4  
PWYO\_1319\_\_CDP\_diacylglycerol\_biosynthesis\_II\_g\_Veillonella\_s\_Veillonella\_dispar  
PWYO\_1319\_\_CDP\_diacylglycerol\_biosynthesis\_II\_g\_Veillonella\_s\_Veillonella\_parvula  
PWYO\_1338\_\_polymyxin\_resistance\_unclassified  
PWYO\_1415\_\_superpathway\_of\_heme\_biosynthesis\_from\_uroporphyrinogen\_III\_unclassified  
PWYO\_1479\_\_tRNA\_processing\_g\_Burkholderiales\_noname\_s\_Burkholderiales\_bacterium\_1\_1  
PWYO\_1479\_\_tRNA\_processing\_g\_Parasutterella\_s\_Parasutterella\_excrementihominis  
PWYO\_1479\_\_tRNA\_processing\_unclassified  
PWYO\_1533\_\_methylphosphonate\_degradation\_I\_unclassified  
PWYO\_1586\_\_peptidoglycan\_maturation\_(meso\_diaminopimelate\_containing)\_g\_Akkermansia\_s  
PWYO\_1586\_\_peptidoglycan\_maturation\_(meso\_diaminopimelate\_containing)\_g\_Bacteroides\_s  
PWYO\_1586\_\_peptidoglycan\_maturation\_(meso\_diaminopimelate\_containing)\_g\_Citrobacter\_s  
PWYO\_1586\_\_peptidoglycan\_maturation\_(meso\_diaminopimelate\_containing)\_g\_Eggerthella\_s  
PWYO\_1586\_\_peptidoglycan\_maturation\_(meso\_diaminopimelate\_containing)\_g\_Eggerthella\_s  
PWYO\_1586\_\_peptidoglycan\_maturation\_(meso\_diaminopimelate\_containing)\_g\_Eggerthella\_s  
PWYO\_1586\_\_peptidoglycan\_maturation\_(meso\_diaminopimelate\_containing)\_g\_Enterobacter\_s  
PWYO\_1586\_\_peptidoglycan\_maturation\_(meso\_diaminopimelate\_containing)\_g\_Klebsiella\_s\_k  
PWYO\_1586\_\_peptidoglycan\_maturation\_(meso\_diaminopimelate\_containing)\_g\_Odoribacter\_s  
PWYO\_1586\_\_peptidoglycan\_maturation\_(meso\_diaminopimelate\_containing)\_g\_Oxalobacter\_s  
PWYO\_1586\_\_peptidoglycan\_maturation\_(meso\_diaminopimelate\_containing)\_g\_Propionibacter  
PWYO\_1586\_\_peptidoglycan\_maturation\_(meso\_diaminopimelate\_containing)\_g\_Ruminococcus  
PWYO\_1586\_\_peptidoglycan\_maturation\_(meso\_diaminopimelate\_containing)\_g\_Streptococcus  
PWYO\_1586\_\_peptidoglycan\_maturation\_(meso\_diaminopimelate\_containing)\_g\_Streptococcus

PWY0\_1586\_\_peptidoglycan\_maturation\_(meso\_diaminopimelate\_containing)\_g\_Veillonella\_s

PWY0\_162\_\_superpathway\_of\_pyrimidine\_ribonucleotides\_de\_novo\_biosynthesis\_g\_Citrobacter

PWY0\_162\_\_superpathway\_of\_pyrimidine\_ribonucleotides\_de\_novo\_biosynthesis\_g\_Klebsiella\_s

PWY0\_162\_\_superpathway\_of\_pyrimidine\_ribonucleotides\_de\_novo\_biosynthesis\_g\_Oxalobacter

PWY0\_162\_\_superpathway\_of\_pyrimidine\_ribonucleotides\_de\_novo\_biosynthesis\_g\_Propionibacter

PWY0\_166\_\_superpathway\_of\_pyrimidine\_deoxyribonucleotides\_de\_novo\_biosynthesis\_(E\_coli)

PWY0\_166\_\_superpathway\_of\_pyrimidine\_deoxyribonucleotides\_de\_novo\_biosynthesis\_(E\_coli)

PWY0\_166\_\_superpathway\_of\_pyrimidine\_deoxyribonucleotides\_de\_novo\_biosynthesis\_(E\_coli)

PWY0\_166\_\_superpathway\_of\_pyrimidine\_deoxyribonucleotides\_de\_novo\_biosynthesis\_(E\_coli)

PWY0\_166\_\_superpathway\_of\_pyrimidine\_deoxyribonucleotides\_de\_novo\_biosynthesis\_(E\_coli)

PWY0\_166\_\_superpathway\_of\_pyrimidine\_deoxyribonucleotides\_de\_novo\_biosynthesis\_(E\_coli)

PWY0\_321\_\_phenylacetate\_degradation\_I\_(aerobic)\_g\_Escherichia\_s\_Escherichia\_coli

PWY0\_321\_\_phenylacetate\_degradation\_I\_(aerobic)\_unclassified

PWY0\_42\_\_2\_methylcitrate\_cycle\_I

PWY0\_42\_\_2\_methylcitrate\_cycle\_I\_g\_Citrobacter\_s\_Citrobacter\_freundii

PWY0\_42\_\_2\_methylcitrate\_cycle\_I\_unclassified

PWY0\_845\_\_superpathway\_of\_pyridoxal\_5\_phosphate\_biosynthesis\_and\_salvage\_g\_Bacteroides

PWY0\_845\_\_superpathway\_of\_pyridoxal\_5\_phosphate\_biosynthesis\_and\_salvage\_g\_Citrobacter

PWY0\_845\_\_superpathway\_of\_pyridoxal\_5\_phosphate\_biosynthesis\_and\_salvage\_g\_Parabacteroides

PWY0\_862\_\_(5Z)\_dodec\_5\_enoate\_biosynthesis\_g\_Bacteroides\_s\_Bacteroides\_sp\_2\_2\_4

PWY0\_862\_\_(5Z)\_dodec\_5\_enoate\_biosynthesis\_g\_Bacteroides\_s\_Bacteroides\_xylanisolvans

PWY0\_862\_\_(5Z)\_dodec\_5\_enoate\_biosynthesis\_g\_Citrobacter\_s\_Citrobacter\_freundii

PWY0\_862\_\_(5Z)\_dodec\_5\_enoate\_biosynthesis\_g\_Enterobacter\_s\_Enterobacter\_cloacae

PWY0\_862\_\_(5Z)\_dodec\_5\_enoate\_biosynthesis\_g\_Klebsiella\_s\_Klebsiella\_pneumoniae

PWY1F\_823\_\_leucopelargonidin\_and\_leucocyanidin\_biosynthesis

PWY1F\_823\_\_leucopelargonidin\_and\_leucocyanidin\_biosynthesis\_g\_Streptococcus\_s\_Streptococcus

PWY3DJ\_35471\_\_L\_ascorbate\_biosynthesis\_IV

PWY3O\_19\_\_ubiquinol\_6\_biosynthesis\_from\_4\_hydroxybenzoate\_(eukaryotic)

PWY4FS\_7\_\_phosphatidylglycerol\_biosynthesis\_I\_(plastidic)\_g\_Citrobacter\_s\_Citrobacter\_freundii

PWY4FS\_7\_\_phosphatidylglycerol\_biosynthesis\_I\_(plastidic)\_g\_Klebsiella\_s\_Klebsiella\_pneumoniae

PWY4FS\_8\_\_phosphatidylglycerol\_biosynthesis\_II\_(non\_plastidic)\_g\_Citrobacter\_s\_Citrobacter\_freundii

PWY4FS\_8\_\_phosphatidylglycerol\_biosynthesis\_II\_(non\_plastidic)\_g\_Klebsiella\_s\_Klebsiella\_pneumoniae

PWY66\_367\_\_ketogenesis

PWY66\_375\_\_leukotriene\_biosynthesis

PWY66\_375\_\_leukotriene\_biosynthesis\_g\_Nakaseomyces\_s\_Candida\_glabrata

PWY66\_375\_\_leukotriene\_biosynthesis\_unclassified

PWY66\_391\_fatty\_acid\_&beta\_oxidation\_VI\_(peroxisome)

PWY66\_391\_fatty\_acid\_&beta\_oxidation\_VI\_(peroxisome)\_unclassified

PWY66\_400\_glycolysis\_VI\_(metazoan)\_g\_Bacteroides\_s\_Bacteroides\_ovatus

PWY66\_400\_glycolysis\_VI\_(metazoan)\_g\_Bacteroides\_s\_Bacteroides\_sp\_1\_1\_30

PWY66\_400\_glycolysis\_VI\_(metazoan)\_g\_Bacteroides\_s\_Bacteroides\_sp\_2\_1\_22

PWY66\_400\_glycolysis\_VI\_(metazoan)\_g\_Bacteroides\_s\_Bacteroides\_sp\_2\_2\_4

PWY66\_400\_glycolysis\_VI\_(metazoan)\_g\_Bacteroides\_s\_Bacteroides\_sp\_3\_1\_23

PWY66\_400\_glycolysis\_VI\_(metazoan)\_g\_Bacteroides\_s\_Bacteroides\_xylanisolvens

PWY66\_400\_glycolysis\_VI\_(metazoan)\_g\_Lactococcus\_s\_Lactococcus\_lactis

PWY66\_400\_glycolysis\_VI\_(metazoan)\_g\_Pediococcus\_s\_Pediococcus\_acidilactici

PWY66\_400\_glycolysis\_VI\_(metazoan)\_g\_Pediococcus\_s\_Pediococcus\_lolii

PWY66\_400\_glycolysis\_VI\_(metazoan)\_g\_Streptococcus\_s\_Streptococcus\_australis

PWY66\_400\_glycolysis\_VI\_(metazoan)\_g\_Streptococcus\_s\_Streptococcus\_mitis\_oralis\_pneum

PWY66\_409\_superpathway\_of\_purine\_nucleotide\_salvage\_g\_Citrobacter\_s\_Citrobacter\_freun

PWY66\_409\_superpathway\_of\_purine\_nucleotide\_salvage\_g\_Streptococcus\_s\_Streptococcus\_

PWY66\_422\_D\_galactose\_degradation\_V\_(Leloir\_pathway)\_g\_Anaerostipes\_s\_Anaerostipes\_h

PWY66\_422\_D\_galactose\_degradation\_V\_(Leloir\_pathway)\_g\_Blautia\_s\_Blautia\_sp\_KLE\_1732

PWY66\_422\_D\_galactose\_degradation\_V\_(Leloir\_pathway)\_g\_Blautia\_s\_Ruminococcus\_obeun

PWY66\_422\_D\_galactose\_degradation\_V\_(Leloir\_pathway)\_g\_Citrobacter\_s\_Citrobacter\_freur

PWY66\_422\_D\_galactose\_degradation\_V\_(Leloir\_pathway)\_g\_Clostridium\_s\_Clostridium\_sp\_S

PWY66\_422\_D\_galactose\_degradation\_V\_(Leloir\_pathway)\_g\_Coprococcus\_s\_Coprococcus\_ca

PWY66\_422\_D\_galactose\_degradation\_V\_(Leloir\_pathway)\_g\_Enterococcus\_s\_Enterococcus\_d

PWY66\_422\_D\_galactose\_degradation\_V\_(Leloir\_pathway)\_g\_Enterococcus\_s\_Enterococcus\_fi

PWY66\_422\_D\_galactose\_degradation\_V\_(Leloir\_pathway)\_g\_Erysipelotrichaceae\_noname\_s\_

PWY66\_422\_D\_galactose\_degradation\_V\_(Leloir\_pathway)\_g\_Eubacterium\_s\_Eubacterium\_si

PWY66\_422\_D\_galactose\_degradation\_V\_(Leloir\_pathway)\_g\_Fusobacterium\_s\_Fusobacteriur

PWY66\_422\_D\_galactose\_degradation\_V\_(Leloir\_pathway)\_g\_Lachnospiraceae\_noname\_s\_La

PWY66\_422\_D\_galactose\_degradation\_V\_(Leloir\_pathway)\_g\_Lachnospiraceae\_noname\_s\_La

PWY66\_422\_D\_galactose\_degradation\_V\_(Leloir\_pathway)\_g\_Lactobacillus\_s\_Lactobacillus\_ca

PWY66\_422\_D\_galactose\_degradation\_V\_(Leloir\_pathway)\_g\_Lactobacillus\_s\_Lactobacillus\_rh

PWY66\_422\_D\_galactose\_degradation\_V\_(Leloir\_pathway)\_g\_Lactococcus\_s\_Lactococcus\_lact

PWY66\_422\_D\_galactose\_degradation\_V\_(Leloir\_pathway)\_g\_Propionibacterium\_s\_Propionib:

PWY66\_422\_D\_galactose\_degradation\_V\_(Leloir\_pathway)\_g\_Ruminococcus\_s\_Ruminococcus

PWY66\_422\_D\_galactose\_degradation\_V\_(Leloir\_pathway)\_g\_Streptococcus\_s\_Streptococcus\_

PWY66\_422\_D\_galactose\_degradation\_V\_(Leloir\_pathway)\_g\_Streptococcus\_s\_Streptococcus\_

PYRIDNUCSAL\_PWY\_NAD\_salvage\_pathway\_I\_g\_Citrobacter\_s\_Citrobacter\_freundii

PYRIDNUCSYN\_PWY\_NAD\_biosynthesis\_I\_(from\_aspartate)\_g\_Alistipes\_s\_Alistipes\_finegoldii

PYRIDNUCSYN\_PWY\_NAD\_biosynthesis\_I\_(from\_aspartate)\_g\_Alistipes\_s\_Alistipes\_senegalen

PYRIDNUCSYN\_PWY\_NAD\_biosynthesis\_I\_(from\_aspartate)\_g\_Alistipes\_s\_Alistipes\_shahii

PYRIDNUCSYN\_PWY\_NAD\_biosynthesis\_I\_(from\_aspartate)\_g\_Anaerostipes\_s\_Anaerostipes\_h

PYRIDNUCSYN\_PWY\_NAD\_biosynthesis\_I\_(from\_aspartate)\_g\_Citrobacter\_s\_Citrobacter\_freur

PYRIDNUCSYN\_PWY\_NAD\_biosynthesis\_I\_(from\_aspartate)\_g\_Clostridium\_s\_Clostridium\_sp\_S

PYRIDNUCSYN\_PWY\_NAD\_biosynthesis\_I\_(from\_aspartate)\_g\_Coprococcus\_s\_Coprococcus\_ca

PYRIDNUCSYN\_PWY\_NAD\_biosynthesis\_I\_(from\_aspartate)\_g\_Coprococcus\_s\_Coprococcus\_eu

PYRIDNUCSYN\_PWY\_NAD\_biosynthesis\_I\_(from\_aspartate)\_g\_Coprococcus\_s\_Coprococcus\_sp

PYRIDNUCSYN\_PWY\_NAD\_biosynthesis\_I\_(from\_aspartate)\_g\_Eubacterium\_s\_Eubacterium\_si

PYRIDNUCSYN\_PWY\_NAD\_biosynthesis\_I\_(from\_aspartate)\_g\_Lachnospiraceae\_noname\_s\_La

PYRIDNUCSYN\_PWY\_\_NAD\_biosynthesis\_I\_(from\_aspartate)\_g\_\_Odoribacter\_s\_\_Odoribacter\_spl  
 PYRIDNUCSYN\_PWY\_\_NAD\_biosynthesis\_I\_(from\_aspartate)\_g\_\_Oxalobacter\_s\_\_Oxalobacter\_for  
 PYRIDNUCSYN\_PWY\_\_NAD\_biosynthesis\_I\_(from\_aspartate)\_g\_\_Propionibacterium\_s\_\_Propionib  
 PYRIDOXSYN\_PWY\_\_pyridoxal\_5\_phosphate\_biosynthesis\_I\_g\_\_Bacteroides\_s\_\_Bacteroides\_egg  
 PYRIDOXSYN\_PWY\_\_pyridoxal\_5\_phosphate\_biosynthesis\_I\_g\_\_Bacteroides\_s\_\_Bacteroides\_fae  
 PYRIDOXSYN\_PWY\_\_pyridoxal\_5\_phosphate\_biosynthesis\_I\_g\_\_Bacteroides\_s\_\_Bacteroides\_frag  
 PYRIDOXSYN\_PWY\_\_pyridoxal\_5\_phosphate\_biosynthesis\_I\_g\_\_Bacteroides\_s\_\_Bacteroides\_ova  
 PYRIDOXSYN\_PWY\_\_pyridoxal\_5\_phosphate\_biosynthesis\_I\_g\_\_Bacteroides\_s\_\_Bacteroides\_sp\_  
 PYRIDOXSYN\_PWY\_\_pyridoxal\_5\_phosphate\_biosynthesis\_I\_g\_\_Bacteroides\_s\_\_Bacteroides\_sp\_  
 PYRIDOXSYN\_PWY\_\_pyridoxal\_5\_phosphate\_biosynthesis\_I\_g\_\_Bacteroides\_s\_\_Bacteroides\_sp\_  
 PYRIDOXSYN\_PWY\_\_pyridoxal\_5\_phosphate\_biosynthesis\_I\_g\_\_Bacteroides\_s\_\_Bacteroides\_sp\_  
 PYRIDOXSYN\_PWY\_\_pyridoxal\_5\_phosphate\_biosynthesis\_I\_g\_\_Bacteroides\_s\_\_Bacteroides\_sp\_  
 PYRIDOXSYN\_PWY\_\_pyridoxal\_5\_phosphate\_biosynthesis\_I\_g\_\_Bacteroides\_s\_\_Bacteroides\_sp\_  
 PYRIDOXSYN\_PWY\_\_pyridoxal\_5\_phosphate\_biosynthesis\_I\_g\_\_Bacteroides\_s\_\_Bacteroides\_ste  
 PYRIDOXSYN\_PWY\_\_pyridoxal\_5\_phosphate\_biosynthesis\_I\_g\_\_Bacteroides\_s\_\_Bacteroides\_the  
 PYRIDOXSYN\_PWY\_\_pyridoxal\_5\_phosphate\_biosynthesis\_I\_g\_\_Bacteroides\_s\_\_Bacteroides\_uni  
 PYRIDOXSYN\_PWY\_\_pyridoxal\_5\_phosphate\_biosynthesis\_I\_g\_\_Bacteroides\_s\_\_Bacteroides\_xyl  
 PYRIDOXSYN\_PWY\_\_pyridoxal\_5\_phosphate\_biosynthesis\_I\_g\_\_Citrobacter\_s\_\_Citrobacter\_freun  
 PYRIDOXSYN\_PWY\_\_pyridoxal\_5\_phosphate\_biosynthesis\_I\_g\_\_Parabacteroides\_s\_\_Parabactero  
 REDCITCYC\_\_TCA\_cycle\_VIII\_(helicobacter)\_g\_\_Citrobacter\_s\_\_Citrobacter\_freundii  
 REDCITCYC\_\_TCA\_cycle\_VIII\_(helicobacter)\_unclassified  
 RHAMCAT\_PWY\_\_L\_rhamnose\_degradation\_I\_g\_\_Bacteroides\_s\_\_Bacteroides\_faecis  
 RHAMCAT\_PWY\_\_L\_rhamnose\_degradation\_I\_g\_\_Bacteroides\_s\_\_Bacteroides\_finegoldii  
 RHAMCAT\_PWY\_\_L\_rhamnose\_degradation\_I\_g\_\_Bacteroides\_s\_\_Bacteroides\_ovatus  
 RHAMCAT\_PWY\_\_L\_rhamnose\_degradation\_I\_g\_\_Bacteroides\_s\_\_Bacteroides\_sp\_1\_1\_30  
 RHAMCAT\_PWY\_\_L\_rhamnose\_degradation\_I\_g\_\_Bacteroides\_s\_\_Bacteroides\_sp\_1\_1\_6  
 RHAMCAT\_PWY\_\_L\_rhamnose\_degradation\_I\_g\_\_Bacteroides\_s\_\_Bacteroides\_sp\_2\_1\_22  
 RHAMCAT\_PWY\_\_L\_rhamnose\_degradation\_I\_g\_\_Bacteroides\_s\_\_Bacteroides\_sp\_2\_2\_4  
 RHAMCAT\_PWY\_\_L\_rhamnose\_degradation\_I\_g\_\_Bacteroides\_s\_\_Bacteroides\_sp\_3\_1\_23  
 RHAMCAT\_PWY\_\_L\_rhamnose\_degradation\_I\_g\_\_Bacteroides\_s\_\_Bacteroides\_thetaiotaomicron  
 RHAMCAT\_PWY\_\_L\_rhamnose\_degradation\_I\_g\_\_Bacteroides\_s\_\_Bacteroides\_xylanisolvans  
 RHAMCAT\_PWY\_\_L\_rhamnose\_degradation\_I\_g\_\_Citrobacter\_s\_\_Citrobacter\_freundii  
 RHAMCAT\_PWY\_\_L\_rhamnose\_degradation\_I\_g\_\_Clostridium\_s\_\_Clostridium\_hathewayi  
 RHAMCAT\_PWY\_\_L\_rhamnose\_degradation\_I\_g\_\_Enterococcus\_s\_\_Enterococcus\_faecalis  
 RHAMCAT\_PWY\_\_L\_rhamnose\_degradation\_I\_g\_\_Eubacterium\_s\_\_Eubacterium\_ventriosum  
 RHAMCAT\_PWY\_\_L\_rhamnose\_degradation\_I\_g\_\_Holdemania\_s\_\_Holdemania\_filiformis  
 RHAMCAT\_PWY\_\_L\_rhamnose\_degradation\_I\_g\_\_Klebsiella\_s\_\_Klebsiella\_pneumoniae  
 RHAMCAT\_PWY\_\_L\_rhamnose\_degradation\_I\_g\_\_Lachnospiraceae\_noname\_s\_\_Lachnospiraceae\_  
 RHAMCAT\_PWY\_\_L\_rhamnose\_degradation\_I\_g\_\_Pediococcus\_s\_\_Pediococcus\_acidilactici  
 RHAMCAT\_PWY\_\_L\_rhamnose\_degradation\_I\_g\_\_Pediococcus\_s\_\_Pediococcus\_lolii  
 RHAMCAT\_PWY\_\_L\_rhamnose\_degradation\_I\_g\_\_Roseburia\_s\_\_Roseburia\_intestinalis  
 RHAMCAT\_PWY\_\_L\_rhamnose\_degradation\_I\_g\_\_Streptococcus\_s\_\_Streptococcus\_parasanguinis  
 RIBOSYN2\_PWY\_\_flavin\_biosynthesis\_I\_(bacteria\_and\_plants)\_g\_\_Propionibacterium\_s\_\_Propioni  
 RUMP\_PWY\_\_formaldehyde\_oxidation\_I  
 RUMP\_PWY\_\_formaldehyde\_oxidation\_I\_unclassified  
 SER\_GLYSYN\_PWY\_\_superpathway\_of\_L\_serine\_and\_glycine\_biosynthesis\_I\_g\_\_Anaerostipes\_s\_\_  
 SER\_GLYSYN\_PWY\_\_superpathway\_of\_L\_serine\_and\_glycine\_biosynthesis\_I\_g\_\_Citrobacter\_s\_\_C

SER\_GLYSYN\_PWY\_\_superpathway\_of\_L\_serine\_and\_glycine\_biosynthesis\_I\_g\_Clostridium\_s\_C  
SER\_GLYSYN\_PWY\_\_superpathway\_of\_L\_serine\_and\_glycine\_biosynthesis\_I\_g\_Coprococcus\_s\_  
SER\_GLYSYN\_PWY\_\_superpathway\_of\_L\_serine\_and\_glycine\_biosynthesis\_I\_g\_Dorea\_s\_Dorea\_  
SER\_GLYSYN\_PWY\_\_superpathway\_of\_L\_serine\_and\_glycine\_biosynthesis\_I\_g\_Enterobacter\_s\_  
SER\_GLYSYN\_PWY\_\_superpathway\_of\_L\_serine\_and\_glycine\_biosynthesis\_I\_g\_Eubacterium\_s\_  
SER\_GLYSYN\_PWY\_\_superpathway\_of\_L\_serine\_and\_glycine\_biosynthesis\_I\_g\_Gordonibacter\_s\_  
SER\_GLYSYN\_PWY\_\_superpathway\_of\_L\_serine\_and\_glycine\_biosynthesis\_I\_g\_Klebsiella\_s\_Kle  
SER\_GLYSYN\_PWY\_\_superpathway\_of\_L\_serine\_and\_glycine\_biosynthesis\_I\_g\_Lachnospiraceae\_  
SER\_GLYSYN\_PWY\_\_superpathway\_of\_L\_serine\_and\_glycine\_biosynthesis\_I\_g\_Phascalactobact  
SER\_GLYSYN\_PWY\_\_superpathway\_of\_L\_serine\_and\_glycine\_biosynthesis\_I\_g\_Propionibacteriur  
SER\_GLYSYN\_PWY\_\_superpathway\_of\_L\_serine\_and\_glycine\_biosynthesis\_I\_g\_Ruminococcus\_s\_  
SER\_GLYSYN\_PWY\_\_superpathway\_of\_L\_serine\_and\_glycine\_biosynthesis\_I\_g\_Streptococcus\_s\_  
SO4ASSIM\_PWY\_\_sulfate\_reduction\_I\_(assimilatory)\_g\_Akkermansia\_s\_Akkermansia\_muciniph  
SO4ASSIM\_PWY\_\_sulfate\_reduction\_I\_(assimilatory)\_g\_Citrobacter\_s\_Citrobacter\_freundii  
SO4ASSIM\_PWY\_\_sulfate\_reduction\_I\_(assimilatory)\_g\_Enterobacter\_s\_Enterobacter\_cloacae  
SO4ASSIM\_PWY\_\_sulfate\_reduction\_I\_(assimilatory)\_g\_Klebsiella\_s\_Klebsiella\_pneumoniae  
SO4ASSIM\_PWY\_\_sulfate\_reduction\_I\_(assimilatory)\_g\_Odoribacter\_s\_Odoribacter\_laneus  
SO4ASSIM\_PWY\_\_sulfate\_reduction\_I\_(assimilatory)\_g\_Odoribacter\_s\_Odoribacter\_splanchnic  
SULFATE\_CYS\_PWY\_\_superpathway\_of\_sulfate\_assimilation\_and\_cysteine\_biosynthesis\_g\_Citrob  
SULFATE\_CYS\_PWY\_\_superpathway\_of\_sulfate\_assimilation\_and\_cysteine\_biosynthesis\_g\_Enter  
SULFATE\_CYS\_PWY\_\_superpathway\_of\_sulfate\_assimilation\_and\_cysteine\_biosynthesis\_g\_Klebs  
TCA\_GLYOX\_BYPASS\_\_superpathway\_of\_glyoxylate\_bypass\_and\_TCA\_g\_Citrobacter\_s\_Citrobac  
TCA\_GLYOX\_BYPASS\_\_superpathway\_of\_glyoxylate\_bypass\_and\_TCA\_g\_Enterobacter\_s\_Enteroc  
TCA\_TCA\_cycle\_I\_(prokaryotic)\_g\_Citrobacter\_s\_Citrobacter\_freundii  
TCA\_TCA\_cycle\_I\_(prokaryotic)\_g\_Enterobacter\_s\_Enterobacter\_cloacae  
TEICHOICACID\_PWY\_\_teichoic\_acid\_(poly\_glycerol)\_biosynthesis\_unclassified  
THISYNARA\_PWY\_\_superpathway\_of\_thiamin\_diphosphate\_biosynthesis\_III\_(eukaryotes)\_g\_Ana  
THISYNARA\_PWY\_\_superpathway\_of\_thiamin\_diphosphate\_biosynthesis\_III\_(eukaryotes)\_g\_Ana  
THISYNARA\_PWY\_\_superpathway\_of\_thiamin\_diphosphate\_biosynthesis\_III\_(eukaryotes)\_g\_Ana  
THISYNARA\_PWY\_\_superpathway\_of\_thiamin\_diphosphate\_biosynthesis\_III\_(eukaryotes)\_g\_Bac  
THISYNARA\_PWY\_\_superpathway\_of\_thiamin\_diphosphate\_biosynthesis\_III\_(eukaryotes)\_g\_Bac  
THISYNARA\_PWY\_\_superpathway\_of\_thiamin\_diphosphate\_biosynthesis\_III\_(eukaryotes)\_g\_Bac  
THISYNARA\_PWY\_\_superpathway\_of\_thiamin\_diphosphate\_biosynthesis\_III\_(eukaryotes)\_g\_Bac  
THISYNARA\_PWY\_\_superpathway\_of\_thiamin\_diphosphate\_biosynthesis\_III\_(eukaryotes)\_g\_Bac  
THISYNARA\_PWY\_\_superpathway\_of\_thiamin\_diphosphate\_biosynthesis\_III\_(eukaryotes)\_g\_Bac  
THISYNARA\_PWY\_\_superpathway\_of\_thiamin\_diphosphate\_biosynthesis\_III\_(eukaryotes)\_g\_Bac  
THISYNARA\_PWY\_\_superpathway\_of\_thiamin\_diphosphate\_biosynthesis\_III\_(eukaryotes)\_g\_Bla  
THISYNARA\_PWY\_\_superpathway\_of\_thiamin\_diphosphate\_biosynthesis\_III\_(eukaryotes)\_g\_Citr  
THISYNARA\_PWY\_\_superpathway\_of\_thiamin\_diphosphate\_biosynthesis\_III\_(eukaryotes)\_g\_Clo:  
THISYNARA\_PWY\_\_superpathway\_of\_thiamin\_diphosphate\_biosynthesis\_III\_(eukaryotes)\_g\_Klel  
THISYNARA\_PWY\_\_superpathway\_of\_thiamin\_diphosphate\_biosynthesis\_III\_(eukaryotes)\_g\_Lacl  
THISYNARA\_PWY\_\_superpathway\_of\_thiamin\_diphosphate\_biosynthesis\_III\_(eukaryotes)\_g\_Pha  
THRESYN\_PWY\_\_superpathway\_of\_L\_threonine\_biosynthesis\_g\_Anaerostipes\_s\_Anaerostipes\_  
THRESYN\_PWY\_\_superpathway\_of\_L\_threonine\_biosynthesis\_g\_Anaerotruncus\_s\_Anaerotrunc  
THRESYN\_PWY\_\_superpathway\_of\_L\_threonine\_biosynthesis\_g\_Bifidobacterium\_s\_Bifidobacte  
THRESYN\_PWY\_\_superpathway\_of\_L\_threonine\_biosynthesis\_g\_Bifidobacterium\_s\_Bifidobacte  
THRESYN\_PWY\_\_superpathway\_of\_L\_threonine\_biosynthesis\_g\_Bifidobacterium\_s\_Bifidobacte

THRESYN\_PWY\_\_superpathway\_of\_L\_threonine\_biosynthesis\_g\_Citrobacter\_s\_Citrobacter\_freu  
THRESYN\_PWY\_\_superpathway\_of\_L\_threonine\_biosynthesis\_g\_Clostridium\_s\_Clostridium\_sp\_  
THRESYN\_PWY\_\_superpathway\_of\_L\_threonine\_biosynthesis\_g\_Collinsella\_s\_Collinsella\_intest  
THRESYN\_PWY\_\_superpathway\_of\_L\_threonine\_biosynthesis\_g\_Coprococcus\_s\_Coprococcus\_c  
THRESYN\_PWY\_\_superpathway\_of\_L\_threonine\_biosynthesis\_g\_Coprococcus\_s\_Coprococcus\_e  
THRESYN\_PWY\_\_superpathway\_of\_L\_threonine\_biosynthesis\_g\_Coprococcus\_s\_Coprococcus\_s  
THRESYN\_PWY\_\_superpathway\_of\_L\_threonine\_biosynthesis\_g\_Enterobacter\_s\_Enterobacter\_i  
THRESYN\_PWY\_\_superpathway\_of\_L\_threonine\_biosynthesis\_g\_Erysipelotrichaceae\_noname\_s\_  
THRESYN\_PWY\_\_superpathway\_of\_L\_threonine\_biosynthesis\_g\_Holdemania\_s\_Holdemania\_fil  
THRESYN\_PWY\_\_superpathway\_of\_L\_threonine\_biosynthesis\_g\_Klebsiella\_s\_Klebsiella\_pneum  
THRESYN\_PWY\_\_superpathway\_of\_L\_threonine\_biosynthesis\_g\_Lachnospiraceae\_noname\_s\_La  
THRESYN\_PWY\_\_superpathway\_of\_L\_threonine\_biosynthesis\_g\_Lactococcus\_s\_Lactococcus\_lac  
THRESYN\_PWY\_\_superpathway\_of\_L\_threonine\_biosynthesis\_g\_Megasphaera\_s\_Megasphaera  
THRESYN\_PWY\_\_superpathway\_of\_L\_threonine\_biosynthesis\_g\_Oxalobacter\_s\_Oxalobacter\_fo  
THRESYN\_PWY\_\_superpathway\_of\_L\_threonine\_biosynthesis\_g\_Phascolarctobacterium\_s\_Phas  
THRESYN\_PWY\_\_superpathway\_of\_L\_threonine\_biosynthesis\_g\_Propionibacterium\_s\_Propionil  
THRESYN\_PWY\_\_superpathway\_of\_L\_threonine\_biosynthesis\_g\_Rothia\_s\_Rothia\_mucilaginos  
THRESYN\_PWY\_\_superpathway\_of\_L\_threonine\_biosynthesis\_g\_Streptococcus\_s\_Streptococcus  
THRESYN\_PWY\_\_superpathway\_of\_L\_threonine\_biosynthesis\_g\_Veillonella\_s\_Veillonella\_dispa  
THRESYN\_PWY\_\_superpathway\_of\_L\_threonine\_biosynthesis\_g\_Veillonella\_s\_Veillonella\_parvu  
TRNA\_CHARGING\_PWY\_\_tRNA\_charging\_g\_Fusobacterium\_s\_Fusobacterium\_nucleatum  
TRPSYN\_PWY\_\_L\_tryptophan\_biosynthesis\_g\_Anaerostipes\_s\_Anaerostipes\_hadrus  
TRPSYN\_PWY\_\_L\_tryptophan\_biosynthesis\_g\_Bacteroides\_s\_Bacteroides\_fragilis  
TRPSYN\_PWY\_\_L\_tryptophan\_biosynthesis\_g\_Bacteroides\_s\_Bacteroides\_xylanisolvens  
TRPSYN\_PWY\_\_L\_tryptophan\_biosynthesis\_g\_Blautia\_s\_Blautia\_sp\_KLE\_1732  
TRPSYN\_PWY\_\_L\_tryptophan\_biosynthesis\_g\_Blautia\_s\_Ruminococcus\_obeum  
TRPSYN\_PWY\_\_L\_tryptophan\_biosynthesis\_g\_Citrobacter\_s\_Citrobacter\_freundii  
TRPSYN\_PWY\_\_L\_tryptophan\_biosynthesis\_g\_Clostridium\_s\_Clostridium\_sp\_SS2\_1  
TRPSYN\_PWY\_\_L\_tryptophan\_biosynthesis\_g\_Coprococcus\_s\_Coprococcus\_eutactus  
TRPSYN\_PWY\_\_L\_tryptophan\_biosynthesis\_g\_Coprococcus\_s\_Coprococcus\_sp\_ART55\_1  
TRPSYN\_PWY\_\_L\_tryptophan\_biosynthesis\_g\_Lactococcus\_s\_Lactococcus\_lactis  
TRPSYN\_PWY\_\_L\_tryptophan\_biosynthesis\_g\_Odoribacter\_s\_Odoribacter\_splanchnicus  
TRPSYN\_PWY\_\_L\_tryptophan\_biosynthesis\_g\_Oxalobacter\_s\_Oxalobacter\_formigenes  
TRPSYN\_PWY\_\_L\_tryptophan\_biosynthesis\_g\_Phascolarctobacterium\_s\_Phascolarctobacterium\_  
TRPSYN\_PWY\_\_L\_tryptophan\_biosynthesis\_g\_Ruminococcus\_s\_Ruminococcus\_champanellensis  
TRPSYN\_PWY\_\_L\_tryptophan\_biosynthesis\_g\_Ruminococcus\_s\_Ruminococcus\_sp  
UBISYN\_PWY\_\_superpathway\_of\_ubiquinol\_8\_biosynthesis\_(prokaryotic)\_g\_Klebsiella\_s\_Klebsi  
UBISYN\_PWY\_\_superpathway\_of\_ubiquinol\_8\_biosynthesis\_(prokaryotic)\_unclassified  
UDPNAGSYN\_PWY\_\_UDP\_N\_acetyl\_D\_glucosamine\_biosynthesis\_I\_g\_Bifidobacterium\_s\_Bifido  
UDPNAGSYN\_PWY\_\_UDP\_N\_acetyl\_D\_glucosamine\_biosynthesis\_I\_g\_Bifidobacterium\_s\_Bifido  
UDPNAGSYN\_PWY\_\_UDP\_N\_acetyl\_D\_glucosamine\_biosynthesis\_I\_g\_Bifidobacterium\_s\_Bifido  
UDPNAGSYN\_PWY\_\_UDP\_N\_acetyl\_D\_glucosamine\_biosynthesis\_I\_g\_Bifidobacterium\_s\_Bifido  
UDPNAGSYN\_PWY\_\_UDP\_N\_acetyl\_D\_glucosamine\_biosynthesis\_I\_g\_Clostridium\_s\_Clostridiu  
UDPNAGSYN\_PWY\_\_UDP\_N\_acetyl\_D\_glucosamine\_biosynthesis\_I\_g\_Coprococcus\_s\_Coprococ  
UDPNAGSYN\_PWY\_\_UDP\_N\_acetyl\_D\_glucosamine\_biosynthesis\_I\_g\_Enterobacter\_s\_Enteroba  
UDPNAGSYN\_PWY\_\_UDP\_N\_acetyl\_D\_glucosamine\_biosynthesis\_I\_g\_Enterococcus\_s\_Enterocc  
UDPNAGSYN\_PWY\_\_UDP\_N\_acetyl\_D\_glucosamine\_biosynthesis\_I\_g\_Enterococcus\_s\_Enterocc

UDPNAGSYN\_PWY\_UDP\_N\_acetyl\_D\_glucosamine\_biosynthesis\_l\_g\_Fusobacterium\_s\_Fusoba  
 UDPNAGSYN\_PWY\_UDP\_N\_acetyl\_D\_glucosamine\_biosynthesis\_l\_g\_Klebsiella\_s\_Klebsiella\_p  
 UDPNAGSYN\_PWY\_UDP\_N\_acetyl\_D\_glucosamine\_biosynthesis\_l\_g\_Lactobacillus\_s\_Lactobaci  
 UDPNAGSYN\_PWY\_UDP\_N\_acetyl\_D\_glucosamine\_biosynthesis\_l\_g\_Lactococcus\_s\_Lactococci  
 UDPNAGSYN\_PWY\_UDP\_N\_acetyl\_D\_glucosamine\_biosynthesis\_l\_g\_Ruminococcus\_s\_Ruminococ  
 UDPNAGSYN\_PWY\_UDP\_N\_acetyl\_D\_glucosamine\_biosynthesis\_l\_g\_Streptococcus\_s\_Streptococ  
 UDPNAGSYN\_PWY\_UDP\_N\_acetyl\_D\_glucosamine\_biosynthesis\_l\_g\_Streptococcus\_s\_Streptococ  
 URSIN\_PWY\_ureide\_biosynthesis  
 URSIN\_PWY\_ureide\_biosynthesis\_unclassified  
 VALSYN\_PWY\_L\_valine\_biosynthesis\_g\_Akkermansia\_s\_Akkermansia\_muciniphila  
 VALSYN\_PWY\_L\_valine\_biosynthesis\_g\_Alistipes\_s\_Alistipes\_indistinctus  
 VALSYN\_PWY\_L\_valine\_biosynthesis\_g\_Alistipes\_s\_Alistipes\_senegalensis  
 VALSYN\_PWY\_L\_valine\_biosynthesis\_g\_Anaerofustis\_s\_Anaerofustis\_stercorihominis  
 VALSYN\_PWY\_L\_valine\_biosynthesis\_g\_Anaerostipes\_s\_Anaerostipes\_hadrus  
 VALSYN\_PWY\_L\_valine\_biosynthesis\_g\_Bacteroides\_s\_Bacteroides\_cellulosilyticus  
 VALSYN\_PWY\_L\_valine\_biosynthesis\_g\_Bacteroides\_s\_Bacteroides\_clarus  
 VALSYN\_PWY\_L\_valine\_biosynthesis\_g\_Bacteroides\_s\_Bacteroides\_finegoldii  
 VALSYN\_PWY\_L\_valine\_biosynthesis\_g\_Bacteroides\_s\_Bacteroides\_intestinalis  
 VALSYN\_PWY\_L\_valine\_biosynthesis\_g\_Bacteroides\_s\_Bacteroides\_massiliensis  
 VALSYN\_PWY\_L\_valine\_biosynthesis\_g\_Bacteroides\_s\_Bacteroides\_plebeius  
 VALSYN\_PWY\_L\_valine\_biosynthesis\_g\_Bacteroides\_s\_Bacteroides\_salysiae  
 VALSYN\_PWY\_L\_valine\_biosynthesis\_g\_Bacteroides\_s\_Bacteroides\_sp\_1\_1\_6  
 VALSYN\_PWY\_L\_valine\_biosynthesis\_g\_Bacteroides\_s\_Bacteroides\_sp\_2\_2\_4  
 VALSYN\_PWY\_L\_valine\_biosynthesis\_g\_Bacteroides\_s\_Bacteroides\_sp\_3\_1\_19  
 VALSYN\_PWY\_L\_valine\_biosynthesis\_g\_Bacteroides\_s\_Bacteroides\_sp\_3\_1\_23  
 VALSYN\_PWY\_L\_valine\_biosynthesis\_g\_Bacteroides\_s\_Bacteroides\_stercoris  
 VALSYN\_PWY\_L\_valine\_biosynthesis\_g\_Bacteroides\_s\_Bacteroides\_xylanisolvans  
 VALSYN\_PWY\_L\_valine\_biosynthesis\_g\_Barnesiella\_s\_Barnesiella\_intestinihominis  
 VALSYN\_PWY\_L\_valine\_biosynthesis\_g\_Bifidobacterium\_s\_Bifidobacterium\_angulatum  
 VALSYN\_PWY\_L\_valine\_biosynthesis\_g\_Bifidobacterium\_s\_Bifidobacterium\_catenulatum  
 VALSYN\_PWY\_L\_valine\_biosynthesis\_g\_Bifidobacterium\_s\_Bifidobacterium\_pseudocatenulatu  
 VALSYN\_PWY\_L\_valine\_biosynthesis\_g\_Bilophila\_s\_Bilophila\_wadsworthia  
 VALSYN\_PWY\_L\_valine\_biosynthesis\_g\_Blautia\_s\_Blautia\_hydrogenotrophica  
 VALSYN\_PWY\_L\_valine\_biosynthesis\_g\_Blautia\_s\_Blautia\_sp\_KLE\_1732  
 VALSYN\_PWY\_L\_valine\_biosynthesis\_g\_Blautia\_s\_Ruminococcus\_obeum  
 VALSYN\_PWY\_L\_valine\_biosynthesis\_g\_Burkholderiales\_noname\_s\_Burkholderiales\_bacterium  
 VALSYN\_PWY\_L\_valine\_biosynthesis\_g\_Butyrvibrio\_s\_Butyrvibrio\_crossotus  
 VALSYN\_PWY\_L\_valine\_biosynthesis\_g\_Catenibacterium\_s\_Catenibacterium\_mitsuokai  
 VALSYN\_PWY\_L\_valine\_biosynthesis\_g\_Citrobacter\_s\_Citrobacter\_freundii  
 VALSYN\_PWY\_L\_valine\_biosynthesis\_g\_Clostridiales\_noname\_s\_Bacteroides\_pectinophilus  
 VALSYN\_PWY\_L\_valine\_biosynthesis\_g\_Clostridiales\_noname\_s\_Clostridiales\_bacterium\_1\_7  
 VALSYN\_PWY\_L\_valine\_biosynthesis\_g\_Clostridium\_s\_Clostridium\_asparagiforme  
 VALSYN\_PWY\_L\_valine\_biosynthesis\_g\_Clostridium\_s\_Clostridium\_bolteae  
 VALSYN\_PWY\_L\_valine\_biosynthesis\_g\_Clostridium\_s\_Clostridium\_citroniae  
 VALSYN\_PWY\_L\_valine\_biosynthesis\_g\_Clostridium\_s\_Clostridium\_clostridioforme  
 VALSYN\_PWY\_L\_valine\_biosynthesis\_g\_Clostridium\_s\_Clostridium\_hathewayi  
 VALSYN\_PWY\_L\_valine\_biosynthesis\_g\_Clostridium\_s\_Clostridium\_leptum



|                                                                                         |
|-----------------------------------------------------------------------------------------|
| VALSYN_PWY__L_valine_biosynthesis_g_Clostridium_s_Clostridium_sp_L2_50                  |
| VALSYN_PWY__L_valine_biosynthesis_g_Clostridium_s_Clostridium_sp_SS2_1                  |
| VALSYN_PWY__L_valine_biosynthesis_g_Collinsella_s_Collinsella_tanakaei                  |
| VALSYN_PWY__L_valine_biosynthesis_g_Copro bacter_s_Copro bacter_fastidiosus             |
| VALSYN_PWY__L_valine_biosynthesis_g_Coprococcus_s_Coprococcus_catus                     |
| VALSYN_PWY__L_valine_biosynthesis_g_Coprococcus_s_Coprococcus_eutactus                  |
| VALSYN_PWY__L_valine_biosynthesis_g_Coprococcus_s_Coprococcus_sp_ART55_1                |
| VALSYN_PWY__L_valine_biosynthesis_g_Dorea_s_Dorea_formicigenerans                       |
| VALSYN_PWY__L_valine_biosynthesis_g_Eggerthella_s_Eggerthella_sp_1_3_56FAA              |
| VALSYN_PWY__L_valine_biosynthesis_g_Eggerthella_s_Eggerthella_sp_HGA1                   |
| VALSYN_PWY__L_valine_biosynthesis_g_Enterobacter_s_Enterobacter_cloacae                 |
| VALSYN_PWY__L_valine_biosynthesis_g_Enterorhabdus_s_Enterorhabdus_caecimuris            |
| VALSYN_PWY__L_valine_biosynthesis_g_Erysipelotrichaceae_noname_s_Clostridium_spiroform  |
| VALSYN_PWY__L_valine_biosynthesis_g_Erysipelotrichaceae_noname_s_Erysipelotrichaceae_ba |
| VALSYN_PWY__L_valine_biosynthesis_g_Erysipelotrichaceae_noname_s_Erysipelotrichaceae_ba |
| VALSYN_PWY__L_valine_biosynthesis_g_Erysipelotrichaceae_noname_s_Eubacterium_cylindroi  |
| VALSYN_PWY__L_valine_biosynthesis_g_Eubacterium_s_Eubacterium_eligens                   |
| VALSYN_PWY__L_valine_biosynthesis_g_Eubacterium_s_Eubacterium_hallii                    |
| VALSYN_PWY__L_valine_biosynthesis_g_Eubacterium_s_Eubacterium_ramulus                   |
| VALSYN_PWY__L_valine_biosynthesis_g_Eubacterium_s_Eubacterium_siraeum                   |
| VALSYN_PWY__L_valine_biosynthesis_g_Eubacterium_s_Eubacterium_sp_3_1_31                 |
| VALSYN_PWY__L_valine_biosynthesis_g_Fusobacterium_s_Fusobacterium_nucleatum             |
| VALSYN_PWY__L_valine_biosynthesis_g_Klebsiella_s_Klebsiella_pneumoniae                  |
| VALSYN_PWY__L_valine_biosynthesis_g_Lachnospiraceae_noname_s_Lachnospiraceae_bacteriu   |
| VALSYN_PWY__L_valine_biosynthesis_g_Lachnospiraceae_noname_s_Lachnospiraceae_bacteriu   |
| VALSYN_PWY__L_valine_biosynthesis_g_Lachnospiraceae_noname_s_Lachnospiraceae_bacteriu   |
| VALSYN_PWY__L_valine_biosynthesis_g_Lachnospiraceae_noname_s_Lachnospiraceae_bacteriu   |
| VALSYN_PWY__L_valine_biosynthesis_g_Lachnospiraceae_noname_s_Lachnospiraceae_bacteriu   |
| VALSYN_PWY__L_valine_biosynthesis_g_Lachnospiraceae_noname_s_Lachnospiraceae_bacteriu   |
| VALSYN_PWY__L_valine_biosynthesis_g_Lachnospiraceae_noname_s_Lachnospiraceae_bacteriu   |
| VALSYN_PWY__L_valine_biosynthesis_g_Odoribacter_s_Odoribacter_laneus                    |
| VALSYN_PWY__L_valine_biosynthesis_g_Odoribacter_s_Odoribacter_splanchnicus              |
| VALSYN_PWY__L_valine_biosynthesis_g_Oxalobacter_s_Oxalobacter_formigenes                |
| VALSYN_PWY__L_valine_biosynthesis_g_Parabacteroides_s_Parabacteroides_distasonis        |
| VALSYN_PWY__L_valine_biosynthesis_g_Parabacteroides_s_Parabacteroides_goldsteinii       |
| VALSYN_PWY__L_valine_biosynthesis_g_Parabacteroides_s_Parabacteroides_johnsonii         |
| VALSYN_PWY__L_valine_biosynthesis_g_Parabacteroides_s_Parabacteroides_merdae            |
| VALSYN_PWY__L_valine_biosynthesis_g_Parabacteroides_s_Parabacteroides_sp_20_3           |
| VALSYN_PWY__L_valine_biosynthesis_g_Parabacteroides_s_Parabacteroides_sp_D13            |
| VALSYN_PWY__L_valine_biosynthesis_g_Paraprevotella_s_Paraprevotella_clara               |
| VALSYN_PWY__L_valine_biosynthesis_g_Paraprevotella_s_Paraprevotella_xylaniphila         |
| VALSYN_PWY__L_valine_biosynthesis_g_Parasutterella_s_Parasutterella_excrementihominis   |
| VALSYN_PWY__L_valine_biosynthesis_g_Peptostreptococcaceae_noname_s_Clostridium_bartle   |
| VALSYN_PWY__L_valine_biosynthesis_g_Phascolarctobacterium_s_Phascolarctobacterium_succ  |
| VALSYN_PWY__L_valine_biosynthesis_g_Propionibacterium_s_Propionibacterium_freudenreich  |
| VALSYN_PWY__L_valine_biosynthesis_g_Roseburia_s_Roseburia_hominis                       |
| VALSYN_PWY__L_valine_biosynthesis_g_Roseburia_s_Roseburia_inulinivorans                 |
| VALSYN_PWY__L_valine_biosynthesis_g_Ruminococcaceae_noname_s_Ruminococcaceae_bacte      |

VALSYN\_PWY\_\_L\_valine\_biosynthesis\_g\_Ruminococcus\_s\_Ruminococcus\_sp  
 VALSYN\_PWY\_\_L\_valine\_biosynthesis\_g\_Ruminococcus\_s\_Ruminococcus\_sp\_JC304  
 VALSYN\_PWY\_\_L\_valine\_biosynthesis\_g\_Streptococcus\_s\_Streptococcus\_australis  
 VALSYN\_PWY\_\_L\_valine\_biosynthesis\_g\_Streptococcus\_s\_Streptococcus\_mitis\_oralis\_pneumon  
 VALSYN\_PWY\_\_L\_valine\_biosynthesis\_g\_Streptococcus\_s\_Streptococcus\_sanguinis  
 VALSYN\_PWY\_\_L\_valine\_biosynthesis\_g\_Subdoligranulum\_s\_Subdoligranulum\_sp\_4\_3\_54A2FA  
 VALSYN\_PWY\_\_L\_valine\_biosynthesis\_g\_Veillonella\_s\_Veillonella\_dispar  
 VALSYN\_PWY\_\_L\_valine\_biosynthesis\_g\_Veillonella\_s\_Veillonella\_parvula  
 PWY\_6151\_\_S\_adenosyl\_L\_methionine\_cycle\_I\_g\_Haemophilus\_s\_Haemophilus\_parainfluenzae  
 PWY\_6387\_\_UDP\_N\_acetylmuramoyl\_pentapeptide\_biosynthesis\_I\_(meso\_diaminopimelate\_cont  
 PWY\_6703\_\_preQ0\_biosynthesis\_g\_Bacteroides\_s\_Bacteroides\_caccae  
 PWY\_1269\_\_CMP\_3\_deoxy\_D\_manno\_octulosonate\_biosynthesis\_I  
 PWY0\_1061\_\_superpathway\_of\_L\_alanine\_biosynthesis\_g\_Haemophilus\_s\_Haemophilus\_pari  
 PWY\_1042\_\_glycolysis\_IV\_(plant\_cytosol)\_g\_Lactococcus\_s\_Lactococcus\_lactis  
 PWY0\_162\_\_superpathway\_of\_pyrimidine\_ribonucleotides\_de\_novo\_biosynthesis  
 PWY66\_400\_\_glycolysis\_VI\_(metazoan)\_unclassified  
 PWY\_6121\_\_5\_aminoimidazole\_ribonucleotide\_biosynthesis\_I  
 PWY\_6396\_\_superpathway\_of\_2,3\_butanediol\_biosynthesis  
 PWY\_6147\_\_6\_hydroxymethyl\_dihydropterin\_diphosphate\_biosynthesis\_I\_unclassified  
 1CMET2\_PWY\_\_N10\_formyl\_tetrahydrofolate\_biosynthesis\_g\_Bacteroides\_s\_Bacteroides\_cacca  
 FAO\_PWY\_\_fatty\_acid\_&beta\_oxidation\_I\_unclassified  
 DTDPRHAMSYN\_PWY\_\_dTDP\_L\_rhamnose\_biosynthesis\_I\_g\_Veillonella\_s\_Veillonella\_atypica  
 PWY\_7013\_\_L\_1,2\_propanediol\_degradation\_g\_Escherichia\_s\_Escherichia\_coli  
 THRESYN\_PWY\_\_superpathway\_of\_L\_threonine\_biosynthesis  
 PWY\_5136\_\_fatty\_acid\_&beta\_oxidation\_II\_(peroxisome)\_unclassified  
 P122\_PWY\_\_heterolactic\_fermentation\_unclassified  
 PWY\_6122\_\_5\_aminoimidazole\_ribonucleotide\_biosynthesis\_II\_g\_Lactococcus\_s\_Lactococcus\_l  
 PWY\_6277\_\_superpathway\_of\_5\_aminoimidazole\_ribonucleotide\_biosynthesis\_g\_Lactococcus\_s  
 PWY\_6545\_\_pyrimidine\_deoxyribonucleotides\_de\_novo\_biosynthesis\_III  
 ILEUSYN\_PWY\_\_L\_ileucine\_biosynthesis\_I\_(from\_threonine)\_g\_Lactococcus\_s\_Lactococcus\_la  
 VALSYN\_PWY\_\_L\_valine\_biosynthesis\_g\_Lactococcus\_s\_Lactococcus\_lactis  
 PWY0\_845\_\_superpathway\_of\_pyridoxal\_5\_phosphate\_biosynthesis\_and\_salvage\_g\_Bacteroid  
 PWY\_5686\_\_UMP\_biosynthesis\_g\_Bifidobacterium\_s\_Bifidobacterium\_longum  
 PWY\_7539\_\_6\_hydroxymethyl\_dihydropterin\_diphosphate\_biosynthesis\_III\_(Chlamydia)\_unclassif  
 PWY0\_1586\_\_peptidoglycan\_maturation\_(meso\_diaminopimelate\_containing)  
 PEPTIDOGLYCANSYN\_PWY\_\_peptidoglycan\_biosynthesis\_I\_(meso\_diaminopimelate\_containing)\_g  
 PWY\_3841\_\_folate\_transformations\_II\_g\_Bacteroides\_s\_Bacteroides\_caccae  
 PWY\_2941\_\_L\_lysine\_biosynthesis\_II\_unclassified  
 PWY\_6386\_\_UDP\_N\_acetylmuramoyl\_pentapeptide\_biosynthesis\_II\_(lysine\_containing)\_g\_Haen  
 FUC\_RHAMCAT\_PWY\_\_superpathway\_of\_fucose\_and\_rhamnose\_degradation\_unclassified  
 PYRIDOXSYN\_PWY\_\_pyridoxal\_5\_phosphate\_biosynthesis\_I\_g\_Bacteroides\_s\_Bacteroides\_cac  
 PWY\_7187\_\_pyrimidine\_deoxyribonucleotides\_de\_novo\_biosynthesis\_II  
 PWY490\_3\_\_nitrate\_reduction\_VI\_(assimilatory)\_unclassified  
 HEMESYN2\_PWY\_\_heme\_biosynthesis\_II\_(anaerobic)\_g\_Haemophilus\_s\_Haemophilus\_pariinfl  
 PWY\_7197\_\_pyrimidine\_deoxyribonucleotide\_phosphorylation\_g\_Haemophilus\_s\_Haemophilus  
 SALVADEHYPOX\_PWY\_\_adenosine\_nucleotides\_degradation\_II  
 ARG+POLYAMINE\_SYN\_\_superpathway\_of\_arginine\_and\_polyamine\_biosynthesis

PWY\_6113\_\_superpathway\_of\_mycolate\_biosynthesis\_unclassified  
 UNINTEGRATED\_g\_Bacteroides\_s\_Bacteroides\_caccae  
 PWY\_5989\_\_stearate\_biosynthesis\_II\_(bacteria\_and\_plants)\_unclassified  
 PWY\_6147\_\_6\_hydroxymethyl\_dihydropterin\_diphosphate\_biosynthesis\_I\_g\_Lactococcus\_s\_Lac  
 PWY\_7219\_\_adenosine\_ribonucleotides\_de\_novo\_biosynthesis\_g\_Lactococcus\_s\_Lactococcus\_I  
 PWY\_6737\_\_starch\_degradation\_V\_g\_Haemophilus\_s\_Haemophilus\_parainfluenzae  
 PWY\_6284\_\_superpathway\_of\_unsaturated\_fatty\_acids\_biosynthesis\_(E\_coli)\_unclassified  
 THISYNARA\_PWY\_\_superpathway\_of\_thiamin\_diphosphate\_biosynthesis\_III\_(eukaryotes)  
 PWY\_7221\_\_guanosine\_ribonucleotides\_de\_novo\_biosynthesis\_g\_Haemophilus\_s\_Haemophilu  
 GLCMANNANAUT\_PWY\_\_superpathway\_of\_N\_acetylglucosamine,\_N\_acetylmannosamine\_and\_N  
 PWY\_6897\_\_thiamin\_salvage\_II  
 PWY\_5188\_\_tetrapyrrole\_biosynthesis\_I\_(from\_glutamate)  
 PWY0\_1261\_\_anhydromuropeptides\_recycling\_unclassified  
 PWY\_5367\_\_petroselinate\_biosynthesis\_unclassified  
 PWY\_7211\_\_superpathway\_of\_pyrimidine\_deoxyribonucleotides\_de\_novo\_biosynthesis  
 PWY0\_1061\_\_superpathway\_of\_L\_alanine\_biosynthesis\_unclassified  
 PWY\_6121\_\_5\_aminoimidazole\_ribonucleotide\_biosynthesis\_I\_g\_Actinomyces\_s\_Actinomyces\_  
 THISYN\_PWY\_\_superpathway\_of\_thiamin\_diphosphate\_biosynthesis\_I\_unclassified  
 GLCMANNANAUT\_PWY\_\_superpathway\_of\_N\_acetylglucosamine,\_N\_acetylmannosamine\_and\_N  
 PWY\_6125\_\_superpathway\_of\_guanosine\_nucleotides\_de\_novo\_biosynthesis\_II\_g\_Haemophilus  
 UNINTEGRATED\_g\_Actinomyces\_s\_Actinomyces\_graevenitzii  
 PWY\_6122\_\_5\_aminoimidazole\_ribonucleotide\_biosynthesis\_II\_g\_Actinomyces\_s\_Actinomyces\_  
 PWY\_6277\_\_superpathway\_of\_5\_aminoimidazole\_ribonucleotide\_biosynthesis\_g\_Actinomyces\_  
 HISTSYN\_PWY\_\_L\_histidine\_biosynthesis  
 PWY\_6317\_\_galactose\_degradation\_I\_(Leloir\_pathway)  
 PWY\_7228\_\_superpathway\_of\_guanosine\_nucleotides\_de\_novo\_biosynthesis\_I\_g\_Haemophilus\_  
 POLYISOPRENSYN\_PWY\_\_polyisoprenoid\_biosynthesis\_(E\_coli)\_unclassified  
 PENTOSE\_P\_PWY\_\_pentose\_phosphate\_pathway\_unclassified  
 PWY\_6901\_\_superpathway\_of\_glucose\_and\_xylose\_degradation\_unclassified  
 PWY\_3001\_\_superpathway\_of\_L\_isoleucine\_biosynthesis\_I  
 COA\_PWY\_1\_\_coenzyme\_A\_biosynthesis\_II\_(mammalian)\_g\_Haemophilus\_s\_Haemophilus\_par  
 GLUTORN\_PWY\_\_L\_ornithine\_biosynthesis\_g\_Lactococcus\_s\_Lactococcus\_lactis  
 PWY\_6936\_\_seleno\_amino\_acid\_biosynthesis\_g\_Haemophilus\_s\_Haemophilus\_parainfluenzae  
 PWY\_7220\_\_adenosine\_deoxyribonucleotides\_de\_novo\_biosynthesis\_II\_g\_Haemophilus\_s\_Hae  
 PWY\_7222\_\_guanosine\_deoxyribonucleotides\_de\_novo\_biosynthesis\_II\_g\_Haemophilus\_s\_Hae  
 PWY\_5840\_\_superpathway\_of\_menaquinol\_7\_biosynthesis\_unclassified  
 PWY\_7199\_\_pyrimidine\_deoxyribonucleosides\_salvage\_g\_Haemophilus\_s\_Haemophilus\_parain  
 PWY\_6519\_\_8\_amino\_7\_oxononanoate\_biosynthesis\_I\_unclassified  
 PWY\_6609\_\_adenine\_and\_adenosine\_salvage\_III  
 PWY\_6165\_\_chorismate\_biosynthesis\_II\_(archaea)  
 PWY\_4981\_\_L\_proline\_biosynthesis\_II\_(from\_arginine)\_unclassified  
 PANTO\_PWY\_\_phosphopantothenate\_biosynthesis\_I\_g\_Actinomyces\_s\_Actinomyces\_graevenit  
 METHGLYUT\_PWY\_\_superpathway\_of\_methylglyoxal\_degradation\_unclassified  
 PWY\_6859\_\_all\_trans\_farnesol\_biosynthesis\_unclassified  
 COBALSYN\_PWY\_\_adenosylcobalamin\_salvage\_from\_cobinamide\_I  
 GLCMANNANAUT\_PWY\_\_superpathway\_of\_N\_acetylglucosamine,\_N\_acetylmannosamine\_and\_N  
 PEPTIDOGLYCANSYN\_PWY\_\_peptidoglycan\_biosynthesis\_I\_(meso\_diaminopimelate\_containing)\_g

PWY\_6387\_\_UDP\_N\_acetylmuramoyl\_pentapeptide\_biosynthesis\_I\_(meso\_diaminopimelate\_containing)  
PWY\_5103\_\_L\_isoleucine\_biosynthesis\_III  
PWY\_7111\_\_pyruvate\_fermentation\_to\_isobutanol\_(engineered)  
FOLSYN\_PWY\_\_superpathway\_of\_tetrahydrofolate\_biosynthesis\_and\_salvage\_unclassified  
COA\_PWY\_1\_\_coenzyme\_A\_biosynthesis\_II\_(mammalian)\_g\_\_Lactococcus\_s\_\_Lactococcus\_lactis  
PWY\_6151\_\_S\_adenosyl\_L\_methionine\_cycle\_I\_g\_\_Actinomyces\_s\_\_Actinomyces\_graevenitzii  
PWY\_5695\_\_urate\_biosynthesis\_inosine\_5\_phosphate\_degradation\_g\_\_Haemophilus\_s\_\_Haemophilus\_para  
P4\_PWY\_\_superpathway\_of\_L\_lysine,\_L\_threonine\_and\_L\_methionine\_biosynthesis\_I  
BIOTIN\_BIOSYNTHESIS\_PWY\_\_biotin\_biosynthesis\_I\_unclassified  
SER\_GLYSYN\_PWY\_\_superpathway\_of\_L\_serine\_and\_glycine\_biosynthesis\_I\_g\_\_Lactococcus\_s\_\_Lactococcus\_lactis  
BRANCHED\_CHAIN\_AA\_SYN\_PWY\_\_superpathway\_of\_branched\_amino\_acid\_biosynthesis  
ARO\_PWY\_\_chorismate\_biosynthesis\_I\_g\_\_Haemophilus\_s\_\_Haemophilus\_para  
DAPLYSINESYN\_PWY\_\_L\_lysine\_biosynthesis\_I\_unclassified  
P185\_PWY\_\_formaldehyde\_assimilation\_III\_(dihydroxyacetone\_cycle)\_unclassified  
PWY\_6612\_\_superpathway\_of\_tetrahydrofolate\_biosynthesis\_unclassified  
COMPLETE\_ARO\_PWY\_\_superpathway\_of\_aromatic\_amino\_acid\_biosynthesis\_g\_\_Haemophilus\_s\_\_Haemophilus\_para  
PWY\_5667\_\_CDP\_diacylglycerol\_biosynthesis\_I\_g\_\_Haemophilus\_s\_\_Haemophilus\_para  
PWY0\_1319\_\_CDP\_diacylglycerol\_biosynthesis\_II\_g\_\_Haemophilus\_s\_\_Haemophilus\_para  
THISYNARA\_PWY\_\_superpathway\_of\_thiamin\_diphosphate\_biosynthesis\_III\_(eukaryotes)\_unclassified  
PWY\_6151\_\_S\_adenosyl\_L\_methionine\_cycle\_I\_g\_\_Lactococcus\_s\_\_Lactococcus\_lactis  
PWY\_6386\_\_UDP\_N\_acetylmuramoyl\_pentapeptide\_biosynthesis\_II\_(lysine\_containing)\_g\_\_Actinomyces\_s\_\_Actinomyces\_graevenitzii  
PWY\_7208\_\_superpathway\_of\_pyrimidine\_nucleobases\_salvage\_g\_\_Haemophilus\_s\_\_Haemophilus\_para  
PWY\_1042\_\_glycolysis\_IV\_(plant\_cytosol)\_g\_\_Haemophilus\_s\_\_Haemophilus\_para  
RIBOSYN2\_PWY\_\_flavin\_biosynthesis\_I\_(bacteria\_and\_plants)\_unclassified  
COA\_PWY\_\_coenzyme\_A\_biosynthesis\_I\_g\_\_Lactococcus\_s\_\_Lactococcus\_lactis  
P124\_PWY\_\_Bifidobacterium\_shunt  
PWY\_7391\_\_isoprene\_biosynthesis\_II\_(engineered)\_unclassified  
PWY\_2942\_\_L\_lysine\_biosynthesis\_III\_g\_\_Haemophilus\_s\_\_Haemophilus\_para  
PWY\_5695\_\_urate\_biosynthesis\_inosine\_5\_phosphate\_degradation  
PWY\_5097\_\_L\_lysine\_biosynthesis\_VI\_g\_\_Haemophilus\_s\_\_Haemophilus\_para  
PWY\_1269\_\_CMP\_3\_deoxy\_D\_manno\_octulosonate\_biosynthesis\_I\_g\_\_Haemophilus\_s\_\_Haemophilus\_para  
PWY\_6163\_\_chorismate\_biosynthesis\_from\_3\_dehydroquinate\_g\_\_Haemophilus\_s\_\_Haemophilus\_para  
PWY\_7184\_\_pyrimidine\_deoxyribonucleotides\_de\_novo\_biosynthesis\_I\_g\_\_Haemophilus\_s\_\_Haemophilus\_para  
P163\_PWY\_\_L\_lysine\_fermentation\_to\_acetate\_and\_butanoate\_unclassified  
FUCCAT\_PWY\_\_fucose\_degradation\_unclassified  
PWY\_561\_\_superpathway\_of\_glyoxylate\_cycle\_and\_fatty\_acid\_degradation\_unclassified  
SER\_GLYSYN\_PWY\_\_superpathway\_of\_L\_serine\_and\_glycine\_biosynthesis\_I\_g\_\_Haemophilus\_s\_\_Haemophilus\_para  
PWY66\_398\_\_TCA\_cycle\_III\_(animals)\_unclassified  
PWY\_841\_\_superpathway\_of\_purine\_nucleotides\_de\_novo\_biosynthesis\_I\_g\_\_Haemophilus\_s\_\_Haemophilus\_para  
PWY\_6703\_\_preQ0\_biosynthesis  
ILEUSYN\_PWY\_\_L\_isoleucine\_biosynthesis\_I\_(from\_threonine)  
VALSYN\_PWY\_\_L\_valine\_biosynthesis  
PWY\_6126\_\_superpathway\_of\_adenosine\_nucleotides\_de\_novo\_biosynthesis\_II\_g\_\_Haemophilus\_s\_\_Haemophilus\_para  
PWY\_5667\_\_CDP\_diacylglycerol\_biosynthesis\_I\_g\_\_Actinomyces\_s\_\_Actinomyces\_odontolyticus  
PWY0\_1319\_\_CDP\_diacylglycerol\_biosynthesis\_II\_g\_\_Actinomyces\_s\_\_Actinomyces\_odontolyticus  
PRPP\_PWY\_\_superpathway\_of\_histidine,\_purine,\_and\_pyrimidine\_biosynthesis  
PWY0\_862\_\_(5Z)\_dodec\_5\_enoate\_biosynthesis\_g\_\_Haemophilus\_s\_\_Haemophilus\_para

PWY\_6700\_\_queuosine\_biosynthesis\_g\_\_Haemophilus\_s\_\_Haemophilus\_parainfluenzae  
PWY\_7229\_\_superpathway\_of\_adenosine\_nucleotides\_de\_novo\_biosynthesis\_I\_g\_\_Haemophilus\_  
PWY\_5188\_\_tetrapyrrole\_biosynthesis\_I\_(from\_glutamate)\_g\_\_Haemophilus\_s\_\_Haemophilus\_pa  
PWY\_7234\_\_inosine\_5\_phosphate\_biosynthesis\_III\_g\_\_Haemophilus\_s\_\_Haemophilus\_parainflu  
PWY66\_400\_\_glycolysis\_VI\_(metazoan)\_g\_\_Haemophilus\_s\_\_Haemophilus\_parainfluenzae  
DTDPRHAMSYN\_PWY\_\_dTDP\_L\_rhamnose\_biosynthesis\_I\_g\_\_Lactococcus\_s\_\_Lactococcus\_lactis  
PWY\_724\_\_superpathway\_of\_L\_lysine,\_L\_threonine\_and\_L\_methionine\_biosynthesis\_II\_g\_\_Haem  
PWY0\_1296\_\_purine\_ribonucleosides\_degradation\_g\_\_Dorea\_s\_\_Dorea\_longicatena  
PWY\_6700\_\_queuosine\_biosynthesis\_g\_\_Bacteroides\_s\_\_Bacteroides\_sp\_3\_2\_5  
VALSYN\_PWY\_\_L\_valine\_biosynthesis\_g\_\_Haemophilus\_s\_\_Haemophilus\_parainfluenzae  
PWY\_6630\_\_superpathway\_of\_L\_tyrosine\_biosynthesis\_unclassified  
PWY\_6471\_\_peptidoglycan\_biosynthesis\_IV\_(Enterococcus\_faecium)  
PWY\_3001\_\_superpathway\_of\_L\_ileucine\_biosynthesis\_I\_g\_\_Haemophilus\_s\_\_Haemophilus\_pa  
ANAGLYCOLYSIS\_PWY\_\_glycolysis\_III\_(from\_glucose)\_g\_\_Haemophilus\_s\_\_Haemophilus\_parainflu  
PWY\_6121\_\_5\_aminimidazole\_ribonucleotide\_biosynthesis\_I\_g\_\_Haemophilus\_s\_\_Haemophilus  
PWY\_7219\_\_adenosine\_ribonucleotides\_de\_novo\_biosynthesis\_g\_\_Haemophilus\_s\_\_Haemophilu  
PWY\_6168\_\_flavin\_biosynthesis\_III\_(fungi)  
THISYNARA\_PWY\_\_superpathway\_of\_thiamin\_diphosphate\_biosynthesis\_III\_(eukaryotes)\_g\_\_Blau  
HISTSYN\_PWY\_\_L\_histidine\_biosynthesis\_g\_\_Streptococcus\_s\_\_Streptococcus\_thermophilus  
P42\_PWY\_\_incomplete\_reductive\_TCA\_cycle  
PWY\_6527\_\_stachyose\_degradation  
HOMOSER\_METSYN\_PWY\_\_L\_methionine\_biosynthesis\_I\_g\_\_Blautia\_s\_\_Ruminococcus\_torques  
ASPASN\_PWY\_\_superpathway\_of\_L\_aspartate\_and\_L\_asparagine\_biosynthesis\_g\_\_Haemophilus\_  
PWY\_621\_\_sucrose\_degradation\_III\_(sucrose\_invertase)\_g\_\_Blautia\_s\_\_Ruminococcus\_torques  
THRESYN\_PWY\_\_superpathway\_of\_L\_threonine\_biosynthesis\_g\_\_Haemophilus\_s\_\_Haemophilus\_  
PWY\_7392\_\_taxadiene\_biosynthesis\_(engineered)\_unclassified  
PWY\_6122\_\_5\_aminimidazole\_ribonucleotide\_biosynthesis\_II\_g\_\_Haemophilus\_s\_\_Haemophilu:  
PWY\_6277\_\_superpathway\_of\_5\_aminimidazole\_ribonucleotide\_biosynthesis\_g\_\_Haemophilus\_  
PANTOSYN\_PWY\_\_pantothenate\_and\_coenzyme\_A\_biosynthesis\_I  
PWY\_7219\_\_adenosine\_ribonucleotides\_de\_novo\_biosynthesis\_g\_\_Dorea\_s\_\_Dorea\_longicatena  
PWY\_7234\_\_inosine\_5\_phosphate\_biosynthesis\_III\_unclassified  
PWY\_6123\_\_inosine\_5\_phosphate\_biosynthesis\_I\_g\_\_Haemophilus\_s\_\_Haemophilus\_parainflue  
UNMAPPED  
PWY\_5686\_\_UMP\_biosynthesis\_g\_\_Dorea\_s\_\_Dorea\_longicatena  
COA\_PWY\_1\_\_coenzyme\_A\_biosynthesis\_II\_(mammalian)\_g\_\_Actinomyces\_s\_\_Actinomyces\_odo  
PWY\_5367\_\_petroselinate\_biosynthesis  
PWY\_5100\_\_pyruvate\_fermentation\_to\_acetate\_and\_lactate\_II\_g\_\_Blautia\_s\_\_Ruminococcus\_tor  
PWY\_5347\_\_superpathway\_of\_L\_methionine\_biosynthesis\_(transsulfuration)  
FASYN\_INITIAL\_PWY\_\_superpathway\_of\_fatty\_acid\_biosynthesis\_initiation\_(E\_coli)\_g\_\_Haemop  
PWY\_2942\_\_L\_lysine\_biosynthesis\_III\_g\_\_Bacteroides\_s\_\_Bacteroides\_sp\_3\_2\_5  
THRESYN\_PWY\_\_superpathway\_of\_L\_threonine\_biosynthesis\_g\_\_Blautia\_s\_\_Ruminococcus\_torqu  
UNINTEGRATED\_g\_\_Streptococcus\_s\_\_Streptococcus\_salivarius  
PWY\_7184\_\_pyrimidine\_deoxyribonucleotides\_de\_novo\_biosynthesis\_I\_unclassified  
PWY\_6608\_\_guanosine\_nucleotides\_degradation\_III\_g\_\_Blautia\_s\_\_Ruminococcus\_torques  
PWY\_7323\_\_superpathway\_of\_GDP\_mannose\_derived\_O\_antigen\_building\_blocks\_biosynthesis\_  
PWY\_6151\_\_S\_adenosyl\_L\_methionine\_cycle\_I\_g\_\_Streptococcus\_s\_\_Streptococcus\_thermophilu  
PWY\_6700\_\_queuosine\_biosynthesis

PWY\_6385\_\_peptidoglycan\_biosynthesis\_III\_(mycobacteria)

METSYN\_PWY\_\_L\_homoserine\_and\_L\_methionine\_biosynthesis\_g\_Blautia\_s\_Ruminococcus\_torques

HOMOSER\_METSYN\_PWY\_\_L\_methionine\_biosynthesis\_I\_unclassified

PWY0\_1241\_\_ADP\_L\_glycero-&beta;-D\_manno\_heptose\_biosynthesis\_g\_Haemophilus\_s\_Haemophilus

PWY\_5347\_\_superpathway\_of\_L\_methionine\_biosynthesis\_(transsulfuration)\_g\_Blautia\_s\_Ruminococcus

NONOXIPENT\_PWY\_\_pentose\_phosphate\_pathway\_(non\_oxidative\_branch)\_g\_Blautia\_s\_Ruminococcus

PWY0\_166\_\_superpathway\_of\_pyrimidine\_deoxyribonucleotides\_de\_novo\_biosynthesis\_(E\_coli)

PWY\_821\_\_superpathway\_of\_sulfur\_amino\_acid\_biosynthesis\_(Saccharomyces\_cerevisiae)

PWY\_7210\_\_pyrimidine\_deoxyribonucleotides\_biosynthesis\_from\_CTP\_g\_Haemophilus\_s\_Haemophilus

MET\_SAM\_PWY\_\_superpathway\_of\_S\_adenosyl\_L\_methionine\_biosynthesis\_g\_Blautia\_s\_Ruminococcus

MET\_SAM\_PWY\_\_superpathway\_of\_S\_adenosyl\_L\_methionine\_biosynthesis

SALVADEHYPOX\_PWY\_\_adenosine\_nucleotides\_degradation\_II\_g\_Blautia\_s\_Ruminococcus\_torques

PWY\_7663\_\_gondooate\_biosynthesis\_(anaerobic)\_g\_Bacteroides\_s\_Bacteroides\_fragilis

TRNA\_CHARGING\_PWY\_\_tRNA\_charging

PWY\_6305\_\_putrescine\_biosynthesis\_IV\_g\_Blautia\_s\_Ruminococcus\_torques

PWY\_5695\_\_urate\_biosynthesis\_inosine\_5\_phosphate\_degradation\_g\_Blautia\_s\_Ruminococcus

PWY\_7198\_\_pyrimidine\_deoxyribonucleotides\_de\_novo\_biosynthesis\_IV\_g\_Haemophilus\_s\_Haemophilus

DTDPRHAMSYN\_PWY\_\_dTDP\_L\_rhamnose\_biosynthesis\_I

PWY\_6126\_\_superpathway\_of\_adenosine\_nucleotides\_de\_novo\_biosynthesis\_II\_unclassified

P4\_PWY\_\_superpathway\_of\_L\_lysine,\_L\_threonine\_and\_L\_methionine\_biosynthesis\_I\_unclassified

PWY\_7219\_\_adenosine\_ribose\_nucleotides\_de\_novo\_biosynthesis\_g\_Blautia\_s\_Ruminococcus\_torques

COA\_PWY\_1\_\_coenzyme\_A\_biosynthesis\_II\_(mammalian)\_g\_Bacteroides\_s\_Bacteroides\_fragilis

PWY\_6549\_\_L\_glutamine\_biosynthesis\_III

PWY\_5367\_\_petroselinic\_acid\_biosynthesis\_g\_Blautia\_s\_Ruminococcus\_torques

PWY0\_1296\_\_purine\_ribose\_nucleosides\_degradation\_g\_Blautia\_s\_Ruminococcus\_torques

PWY\_7115\_\_C4\_photosynthetic\_carbon\_assimilation\_cycle,\_NAD\_ME\_type\_unclassified

METSYN\_PWY\_\_L\_homoserine\_and\_L\_methionine\_biosynthesis

PWY\_7357\_\_thiamin\_formation\_from\_pyritiamine\_and\_oxithiamine\_(yeast)\_g\_Lactococcus\_s\_Lactococcus

PWY\_7357\_\_thiamin\_formation\_from\_pyritiamine\_and\_oxithiamine\_(yeast)\_g\_Blautia\_s\_Ruminococcus

PWY\_6124\_\_inosine\_5\_phosphate\_biosynthesis\_II\_g\_Haemophilus\_s\_Haemophilus\_painfluenzae

PWY\_4984\_\_urea\_cycle

HEXITOLDEGSUPER\_PWY\_\_superpathway\_of\_hexitol\_degradation\_(bacteria)\_unclassified

HEMESYN2\_PWY\_\_heme\_biosynthesis\_II\_(anaerobic)\_g\_Actinomyces\_s\_Actinomyces\_odontolyticus

PWY\_6703\_\_preQ0\_biosynthesis\_g\_Blautia\_s\_Ruminococcus\_torques

PWY\_6386\_\_UDP\_N\_acetylmuramoyl\_pentapeptide\_biosynthesis\_II\_(lysine\_containing)\_g\_Streptococcus

VALSYN\_PWY\_\_L\_valine\_biosynthesis\_g\_Dorea\_s\_Dorea\_longicatena

PWY\_7111\_\_pyruvate\_fermentation\_to\_isobutanol\_(engineered)\_g\_Haemophilus\_s\_Haemophilus

HOMOSER\_METSYN\_PWY\_\_L\_methionine\_biosynthesis\_I

PWY\_6609\_\_adenine\_and\_adenosine\_salvage\_III\_g\_Blautia\_s\_Ruminococcus\_torques

PWY\_5667\_\_CDP\_diacylglycerol\_biosynthesis\_I\_g\_Blautia\_s\_Ruminococcus\_torques

PWY0\_1319\_\_CDP\_diacylglycerol\_biosynthesis\_II\_g\_Blautia\_s\_Ruminococcus\_torques

RHAMCAT\_PWY\_\_L\_rhamnose\_degradation\_I\_g\_Blautia\_s\_Ruminococcus\_torques

PWY\_5686\_\_UMP\_biosynthesis\_g\_Blautia\_s\_Ruminococcus\_torques

PWY\_5686\_\_UMP\_biosynthesis\_g\_Bacteroides\_s\_Bacteroides\_sp\_3\_2\_5

P105\_PWY\_\_TCA\_cycle\_IV\_(2\_oxoglutarate\_decarboxylase)\_unclassified

PWY\_1042\_\_glycolysis\_IV\_(plant\_cytosol)

PWY\_2942\_\_L\_lysine\_biosynthesis\_III\_unclassified

COLANSYN\_PWY\_colanic\_acid\_building\_blocks\_biosynthesis\_unclassified  
PWY0\_1297\_superpathway\_of\_purine\_deoxyribonucleosides\_degradation\_g\_Blautia\_s\_Ruminococcus\_torques  
PWY\_2942\_L\_lysine\_biosynthesis\_III\_g\_Blautia\_s\_Ruminococcus\_torques  
PWY\_5941\_glycogen\_degradation\_II\_(eukaryotic)\_unclassified  
PWY\_6317\_galactose\_degradation\_I\_(Leloir\_pathway)\_g\_Blautia\_s\_Ruminococcus\_torques  
PWY66\_422\_D\_galactose\_degradation\_V\_(Leloir\_pathway)\_g\_Blautia\_s\_Ruminococcus\_torques  
PWY\_6151\_S\_adenosyl\_L\_methionine\_cycle\_I\_g\_Blautia\_s\_Ruminococcus\_torques  
GLUTORN\_PWY\_L\_ornithine\_biosynthesis\_g\_Blautia\_s\_Ruminococcus\_torques  
PWY\_5686\_UMP\_biosynthesis\_g\_Bacteroides\_s\_Bacteroides\_fragilis  
PANTO\_PWY\_phosphopantothenate\_biosynthesis\_I\_g\_Bacteroides\_s\_Bacteroides\_fragilis  
COMPLETE\_ARO\_PWY\_superpathway\_of\_aromatic\_amino\_acid\_biosynthesis\_g\_Blautia\_s\_Ruminococcus\_torques  
PWY\_7111\_pyruvate\_fermentation\_to\_isobutanol\_(engineered)\_g\_Dorea\_s\_Dorea\_longicatena  
PWY\_6936\_seleno\_amino\_acid\_biosynthesis\_g\_Dorea\_s\_Dorea\_longicatena  
SER\_GLYSYN\_PWY\_superpathway\_of\_L\_serine\_and\_glycine\_biosynthesis\_I\_g\_Blautia\_s\_Ruminococcus\_torques  
PWY\_5973\_cis\_vaccenate\_biosynthesis\_g\_Blautia\_s\_Ruminococcus\_torques  
PWY\_6737\_starch\_degradation\_V\_g\_Blautia\_s\_Ruminococcus\_torques  
DENOVOPURINE2\_PWY\_superpathway\_of\_purine\_nucleotides\_de\_novo\_biosynthesis\_II\_g\_Haemophilus\_s\_Haemophilus\_sparitius  
ARO\_PWY\_chorismate\_biosynthesis\_I\_g\_Blautia\_s\_Ruminococcus\_torques  
PANTO\_PWY\_phosphopantothenate\_biosynthesis\_I\_g\_Dorea\_s\_Dorea\_longicatena  
PWY0\_781\_aspartate\_superpathway\_unclassified  
PWY\_7187\_pyrimidine\_deoxyribonucleotides\_de\_novo\_biosynthesis\_II\_g\_Haemophilus\_s\_Haemophilus\_sparitius  
PWY0\_1296\_purine\_ribonucleosides\_degradation  
PWY\_5097\_L\_lysine\_biosynthesis\_VI\_g\_Blautia\_s\_Ruminococcus\_torques  
PWY\_241\_C4\_photosynthetic\_carbon\_assimilation\_cycle,\_NADP\_ME\_type  
CITRULBIO\_PWY\_L\_citrulline\_biosynthesis  
PWY\_6163\_chorismate\_biosynthesis\_from\_3\_dehydroquinolate\_g\_Blautia\_s\_Ruminococcus\_torques  
VALSYN\_PWY\_L\_valine\_biosynthesis\_g\_Blautia\_s\_Ruminococcus\_torques  
1CMET2\_PWY\_N10\_formyl\_tetrahydrofolate\_biosynthesis\_g\_Bacteroides\_s\_Bacteroides\_sp\_3\_2\_5  
PWY\_7208\_superpathway\_of\_pyrimidine\_nucleobases\_salvage\_g\_Blautia\_s\_Ruminococcus\_torques  
PEPTIDOLYCANSYN\_PWY\_peptidoglycan\_biosynthesis\_I\_(meso\_diaminopimelate\_containing)\_g\_Blautia\_s\_Ruminococcus\_torques  
COA\_PWY\_coenzyme\_A\_biosynthesis\_I\_g\_Blautia\_s\_Ruminococcus\_torques  
PWY\_6385\_peptidoglycan\_biosynthesis\_III\_(mycobacteria)\_g\_Blautia\_s\_Ruminococcus\_torques  
PWY\_6387\_UDP\_N\_acetylmuramoyl\_pentapeptide\_biosynthesis\_I\_(meso\_diaminopimelate\_containing)\_g\_Blautia\_s\_Ruminococcus\_torques  
PWY\_1042\_glycolysis\_IV\_(plant\_cytosol)\_g\_Blautia\_s\_Ruminococcus\_torques  
UNINTEGRATED\_g\_Bifidobacterium\_s\_Bifidobacterium\_adolescentis  
COA\_PWY\_1\_coenzyme\_A\_biosynthesis\_II\_(mammalian)\_g\_Blautia\_s\_Ruminococcus\_torques  
PWY\_6124\_inosine\_5\_phosphate\_biosynthesis\_II\_g\_Bacteroides\_s\_Bacteroides\_fragilis  
TRPSYN\_PWY\_L\_tryptophan\_biosynthesis\_g\_Blautia\_s\_Ruminococcus\_torques  
PWY\_7111\_pyruvate\_fermentation\_to\_isobutanol\_(engineered)\_g\_Blautia\_s\_Ruminococcus\_torques  
PWY\_5097\_L\_lysine\_biosynthesis\_VI\_g\_Bacteroides\_s\_Bacteroides\_sp\_3\_2\_5  
PWY\_7003\_glycerol\_degradation\_to\_butanol\_unclassified  
MET\_SAM\_PWY\_superpathway\_of\_S\_adenosyl\_L\_methionine\_biosynthesis\_unclassified  
PWY\_5154\_L\_arginine\_biosynthesis\_III\_(via\_N\_acetyl\_L\_citrulline)\_g\_Blautia\_s\_Ruminococcus\_torques  
PWY\_6122\_5\_aminoimidazole\_ribonucleotide\_biosynthesis\_II\_g\_Dorea\_s\_Dorea\_longicatena  
PWY\_6277\_superpathway\_of\_5\_aminoimidazole\_ribonucleotide\_biosynthesis\_g\_Dorea\_s\_Dorea\_longicatena  
P441\_PWY\_superpathway\_of\_N\_acetylneuraminate\_degradation\_unclassified  
PWY\_7400\_L\_arginine\_biosynthesis\_IV\_(archaeobacteria)\_g\_Blautia\_s\_Ruminococcus\_torques

ARGSYN\_PWY\_\_L\_arginine\_biosynthesis\_I\_(via\_L\_ornithine)\_g\_\_Blautia\_s\_\_Ruminococcus\_torque  
 PWY\_6386\_\_UDP\_N\_acetylmuramoyl\_pentapeptide\_biosynthesis\_II\_(lysine\_containing)\_g\_\_Blaut  
 ARGSYNBSUB\_PWY\_\_L\_arginine\_biosynthesis\_II\_(acetyl\_cycle)\_g\_\_Blautia\_s\_\_Ruminococcus\_tor  
 PYRIDOSYN\_PWY\_\_pyridoxal\_5\_\_phosphate\_biosynthesis\_I\_g\_\_Bacteroides\_s\_\_Bacteroides\_sp\_  
 PWY0\_845\_\_superpathway\_of\_pyridoxal\_5\_\_phosphate\_biosynthesis\_and\_salvage\_g\_\_Bacteroid  
 UNINTEGRATED\_g\_\_Dorea\_s\_\_Dorea\_longicatena  
 PWY\_6121\_\_5\_aminimidazole\_ribose\_nucleotide\_biosynthesis\_I\_g\_\_Dorea\_s\_\_Dorea\_longicatena  
 CITRULBIO\_PWY\_\_L\_citrulline\_biosynthesis\_unclassified  
 GLUCONEO\_PWY\_\_gluconeogenesis\_I\_unclassified  
 PWY\_6606\_\_guanosine\_nucleotides\_degradation\_II\_unclassified  
 PANTO\_PWY\_\_phosphopantothenate\_biosynthesis\_I\_g\_\_Blautia\_s\_\_Ruminococcus\_torque  
 COA\_PWY\_\_coenzyme\_A\_biosynthesis\_I\_g\_\_Actinomyces\_s\_\_Actinomyces\_odontolyticus  
 GLYCOGENSYNTH\_PWY\_\_glycogen\_biosynthesis\_I\_(from\_ADP\_D\_Glucose)  
 PWY\_6386\_\_UDP\_N\_acetylmuramoyl\_pentapeptide\_biosynthesis\_II\_(lysine\_containing)\_g\_\_Bacte  
 PWY0\_166\_\_superpathway\_of\_pyrimidine\_deoxyribonucleotides\_de\_novo\_biosynthesis\_(E\_coli)  
 PWY0\_1319\_\_CDP\_diacylglycerol\_biosynthesis\_II  
 PWY\_5667\_\_CDP\_diacylglycerol\_biosynthesis\_I  
 SER\_GLYSYN\_PWY\_\_superpathway\_of\_L\_serine\_and\_glycine\_biosynthesis\_I\_g\_\_Actinomyces\_s\_\_  
 PYRIDOSYN\_PWY\_\_pyridoxal\_5\_\_phosphate\_biosynthesis\_I\_unclassified  
 PWY\_7219\_\_adenosine\_ribose\_nucleotides\_de\_novo\_biosynthesis\_g\_\_Bacteroides\_s\_\_Bacteroides\_f  
 PWY\_821\_\_superpathway\_of\_sulfur\_amino\_acid\_biosynthesis\_(Saccharomyces\_cerevisiae)\_uncla  
 PWY0\_781\_\_aspartate\_superpathway  
 PWY0\_1298\_\_superpathway\_of\_pyrimidine\_deoxyribonucleosides\_degradation\_unclassified  
 PWY\_6385\_\_peptidoglycan\_biosynthesis\_III\_(mycobacteria)\_g\_\_Bacteroides\_s\_\_Bacteroides\_sp\_3  
 PWY\_5464\_\_superpathway\_of\_cytosolic\_glycolysis\_(plants)\_pyruvate\_dehydrogenase\_and\_TCA\_  
 PWY\_6125\_\_superpathway\_of\_guanosine\_nucleotides\_de\_novo\_biosynthesis\_II\_g\_\_Actinomyces  
 COMPLETE\_ARO\_PWY\_\_superpathway\_of\_aromatic\_amino\_acid\_biosynthesis  
 PWY\_5097\_\_L\_lysine\_biosynthesis\_VI\_g\_\_Actinomyces\_s\_\_Actinomyces\_odontolyticus  
 METSYN\_PWY\_\_L\_homoserine\_and\_L\_methionine\_biosynthesis\_unclassified  
 PWY\_7282\_\_4\_amin\_2\_methyl\_5\_phosphomethylpyrimidine\_biosynthesis\_(yeast)\_g\_\_Bacteroid  
 PYRIDNUCSAL\_PWY\_\_NAD\_salvage\_pathway\_I  
 PEPTIDOLYCANSYN\_PWY\_\_peptidoglycan\_biosynthesis\_I\_(meso\_diaminopimelate\_containing)\_g  
 ASPASN\_PWY\_\_superpathway\_of\_L\_aspartate\_and\_L\_asparagine\_biosynthesis\_unclassified  
 PANTO\_PWY\_\_phosphopantothenate\_biosynthesis\_I  
 PWY\_5686\_\_UMP\_biosynthesis\_g\_\_Collinsella\_s\_\_Collinsella\_aerofaciens  
 PWY\_7560\_\_methylerythritol\_phosphate\_pathway\_II\_unclassified  
 UNINTEGRATED\_g\_\_Ruminococcus\_s\_\_Ruminococcus\_lactaris  
 PWY0\_845\_\_superpathway\_of\_pyridoxal\_5\_\_phosphate\_biosynthesis\_and\_salvage\_unclassified  
 PWY\_6168\_\_flavin\_biosynthesis\_III\_(fungi)\_unclassified  
 SER\_GLYSYN\_PWY\_\_superpathway\_of\_L\_serine\_and\_glycine\_biosynthesis\_I  
 DAPLYSINESYN\_PWY\_\_L\_lysine\_biosynthesis\_I\_g\_\_Actinomyces\_s\_\_Actinomyces\_odontolyticus  
 PWY\_6167\_\_flavin\_biosynthesis\_II\_(archaea)  
 PYRIDOSYN\_PWY\_\_pyridoxal\_5\_\_phosphate\_biosynthesis\_I  
 UNINTEGRATED\_g\_\_Actinomyces\_s\_\_Actinomyces\_odontolyticus  
 PWY\_6387\_\_UDP\_N\_acetylmuramoyl\_pentapeptide\_biosynthesis\_I\_(meso\_diaminopimelate\_coni  
 PWY\_7221\_\_guanosine\_ribose\_nucleotides\_de\_novo\_biosynthesis\_g\_\_Actinomyces\_s\_\_Actinomyces  
 PWY\_7228\_\_superpathway\_of\_guanosine\_nucleotides\_de\_novo\_biosynthesis\_I\_g\_\_Actinomyces



PWY0\_1479\_\_tRNA\_processing  
 PWY\_5686\_\_UMP\_biosynthesis\_g\_\_Coproccoccus\_s\_\_Coproccoccus\_comes  
 PWY\_7219\_\_adenosine\_ribonucleotides\_de\_novo\_biosynthesis\_g\_\_Coproccoccus\_s\_\_Coproccoccus  
 PWY\_5188\_\_tetrapyrrole\_biosynthesis\_I\_(from\_glutamate)\_g\_\_Actinomyces\_s\_\_Actinomyces\_od  
 PWY4LZ\_257\_\_superpathway\_of\_fermentation\_(Chlamydomonas\_reinhardtii)  
 PWY\_4984\_\_urea\_cycle\_unclassified  
 PWY\_7220\_\_adenosine\_deoxyribonucleotides\_de\_novo\_biosynthesis\_II\_g\_\_Actinomyces\_s\_\_Acti  
 PWY\_7222\_\_guanosine\_deoxyribonucleotides\_de\_novo\_biosynthesis\_II\_g\_\_Actinomyces\_s\_\_Acti  
 PWY\_7196\_\_superpathway\_of\_pyrimidine\_ribonucleosides\_salvage  
 PWY\_6385\_\_peptidoglycan\_biosynthesis\_III\_(mycobacteria)\_g\_\_Bacteroides\_s\_\_Bacteroides\_fragi  
 PWY\_6122\_\_5\_aminimidazole\_ribonucleotide\_biosynthesis\_II\_g\_\_Coproccoccus\_s\_\_Coproccoccus  
 PWY\_6277\_\_superpathway\_of\_5\_aminimidazole\_ribonucleotide\_biosynthesis\_g\_\_Coproccoccus\_s  
 PWY\_7282\_\_4\_amino\_2\_methyl\_5\_phosphomethylpyrimidine\_biosynthesis\_(yeast)\_unclassified  
 PWY\_5097\_\_L\_lysine\_biosynthesis\_VI\_unclassified  
 PWY\_7219\_\_adenosine\_ribonucleotides\_de\_novo\_biosynthesis\_g\_\_Bacteroides\_s\_\_Bacteroides\_s  
 PWY\_6703\_\_preQ0\_biosynthesis\_g\_\_Bacteroides\_s\_\_Bacteroides\_sp\_3\_2\_5  
 PWY\_621\_\_sucrose\_degradation\_III\_(sucrose\_invertase)\_unclassified  
 POLYAMSYN\_PWY\_\_superpathway\_of\_polyamine\_biosynthesis\_I  
 ARO\_PWY\_\_chorismate\_biosynthesis\_I  
 ARGININE\_SYN4\_PWY\_\_L\_ornithine\_de\_novo\_\_biosynthesis\_unclassified  
 PWY\_6121\_\_5\_aminimidazole\_ribonucleotide\_biosynthesis\_I\_g\_\_Coproccoccus\_s\_\_Coproccoccus  
 RHAMCAT\_PWY\_\_L\_rhamnose\_degradation\_I  
 PWY\_7199\_\_pyrimidine\_deoxyribonucleosides\_salvage\_unclassified  
 UNINTEGRATED\_g\_\_Blautia\_s\_\_Ruminococcus\_torques  
 PWY\_6125\_\_superpathway\_of\_guanosine\_nucleotides\_de\_novo\_biosynthesis\_II\_unclassified  
 PWY\_6470\_\_peptidoglycan\_biosynthesis\_V\_(&beta\_lactam\_resistance)  
 NONMEVIPP\_PWY\_\_methylerythritol\_phosphate\_pathway\_I  
 PWY\_6588\_\_pyruvate\_fermentation\_to\_acetone\_unclassified  
 PWY\_7197\_\_pyrimidine\_deoxyribonucleotide\_phosphorylation\_g\_\_Actinomyces\_s\_\_Actinomyces  
 COA\_PWY\_1\_\_coenzyme\_A\_biosynthesis\_II\_(mammalian)\_g\_\_Collinsella\_s\_\_Collinsella\_aerofacie  
 PANTO\_PWY\_\_phosphopantothenate\_biosynthesis\_I\_g\_\_Actinomyces\_s\_\_Actinomyces\_odontolyt  
 PWY\_3841\_\_folate\_transformations\_II\_g\_\_Bacteroides\_s\_\_Bacteroides\_sp\_3\_2\_5  
 ARGININE\_SYN4\_PWY\_\_L\_ornithine\_de\_novo\_\_biosynthesis\_g\_\_Bacteroides\_s\_\_Bacteroides\_frag  
 PWY\_5659\_\_GDP\_mannose\_biosynthesis  
 PWY\_7229\_\_superpathway\_of\_adenosine\_nucleotides\_de\_novo\_biosynthesis\_I\_unclassified  
 PWY\_6609\_\_adenine\_and\_adenosine\_salvage\_III\_g\_\_Bacteroides\_s\_\_Bacteroides\_fragilis  
 PWY\_6270\_\_isoprene\_biosynthesis\_I\_unclassified  
 PWY\_6386\_\_UDP\_N\_acetylmuramoyl\_pentapeptide\_biosynthesis\_II\_(lysine\_containing)\_g\_\_Bacte  
 PWY\_7228\_\_superpathway\_of\_guanosine\_nucleotides\_de\_novo\_biosynthesis\_I\_unclassified  
 PWY\_5667\_\_CDP\_diacylglycerol\_biosynthesis\_I\_g\_\_Bacteroides\_s\_\_Bacteroides\_sp\_3\_2\_5  
 PWY0\_1319\_\_CDP\_diacylglycerol\_biosynthesis\_II\_g\_\_Bacteroides\_s\_\_Bacteroides\_sp\_3\_2\_5  
 PWY\_6737\_\_starch\_degradation\_V\_g\_\_Coproccoccus\_s\_\_Coproccoccus\_comes  
 UNINTEGRATED\_g\_\_Coproccoccus\_s\_\_Coproccoccus\_comes  
 P162\_PWY\_\_L\_glutamate\_degradation\_V\_(via\_hydroxyglutarate)  
 UNINTEGRATED\_g\_\_Bacteroides\_s\_\_Bacteroides\_sp\_3\_2\_5  
 PWY\_6386\_\_UDP\_N\_acetylmuramoyl\_pentapeptide\_biosynthesis\_II\_(lysine\_containing)\_g\_\_Copr  
 COA\_PWY\_1\_\_coenzyme\_A\_biosynthesis\_II\_(mammalian)\_g\_\_Coproccoccus\_s\_\_Coproccoccus\_com

PEPTIDOGLYCANSYN\_PWY\_\_peptidoglycan\_biosynthesis\_I\_(meso\_diaminopimelate\_containing)\_g  
 COA\_PWY\_1\_\_coenzyme\_A\_biosynthesis\_II\_(mammalian)\_g\_\_Dorea\_s\_\_Dorea\_longicatena  
 PWY\_7197\_\_pyrimidine\_deoxyribonucleotide\_phosphorylation\_unclassified  
 PWY\_7663\_\_gondoate\_biosynthesis\_(anaerobic)\_g\_\_Bacteroides\_s\_\_Bacteroides\_sp\_3\_2\_5  
 PWY\_6151\_\_S\_adenosyl\_L\_methionine\_cycle\_I\_g\_\_Coproccoccus\_s\_\_Coproccoccus\_comes  
 PEPTIDOGLYCANSYN\_PWY\_\_peptidoglycan\_biosynthesis\_I\_(meso\_diaminopimelate\_containing)\_g  
 PWY\_5667\_\_CDP\_diacylglycerol\_biosynthesis\_I\_g\_\_Coproccoccus\_s\_\_Coproccoccus\_comes  
 PWY0\_1319\_\_CDP\_diacylglycerol\_biosynthesis\_II\_g\_\_Coproccoccus\_s\_\_Coproccoccus\_comes  
 CALVIN\_PWY\_\_Calvin\_Benson\_Bassham\_cycle  
 VALSYN\_PWY\_\_L\_valine\_biosynthesis\_g\_\_Coproccoccus\_s\_\_Coproccoccus\_comes  
 PWY\_6163\_\_chorismate\_biosynthesis\_from\_3\_dehydroquinate  
 PWY\_6387\_\_UDP\_N\_acetylmuramoyl\_pentapeptide\_biosynthesis\_I\_(meso\_diaminopimelate\_containing)\_g  
 PWY\_7221\_\_guanosine\_ribonucleotides\_de\_novo\_biosynthesis\_g\_\_Bacteroides\_s\_\_Bacteroides\_sp\_3\_2\_5  
 PWY\_5695\_\_urate\_biosynthesis\_inosine\_5\_phosphate\_degradation\_g\_\_Bacteroides\_s\_\_Bacteroides\_sp\_3\_2\_5  
 PWY\_6588\_\_pyruvate\_fermentation\_to\_acetone  
 PWY\_5100\_\_pyruvate\_fermentation\_to\_acetate\_and\_lactate\_II\_unclassified  
 PWY\_6609\_\_adenine\_and\_adenosine\_salvage\_III\_g\_\_Bacteroides\_s\_\_Bacteroides\_sp\_3\_2\_5  
 PWY66\_399\_\_gluconeogenesis\_III\_unclassified  
 PWY\_7391\_\_isoprene\_biosynthesis\_II\_(engineered)  
 PWY\_6121\_\_5\_aminimidazole\_ribonucleotide\_biosynthesis\_I\_g\_\_Actinomyces\_s\_\_Actinomyces\_sp\_1373  
 PWY\_7242\_\_D\_fructuronate\_degradation  
 PWY\_5347\_\_superpathway\_of\_L\_methionine\_biosynthesis\_(transsulfuration)\_unclassified  
 P164\_PWY\_\_purine\_nucleobases\_degradation\_I\_(anaerobic)  
 PWY\_5189\_\_tetrapyrrole\_biosynthesis\_II\_(from\_glycine)\_g\_\_Actinomyces\_s\_\_Actinomyces\_odontolyticus  
 PWY\_5695\_\_urate\_biosynthesis\_inosine\_5\_phosphate\_degradation\_g\_\_Bacteroides\_s\_\_Bacteroides\_sp\_3\_2\_5  
 PWY\_6545\_\_pyrimidine\_deoxyribonucleotides\_de\_novo\_biosynthesis\_III\_unclassified  
 PWY\_7111\_\_pyruvate\_fermentation\_to\_isobutanol\_(engineered)\_g\_\_Coproccoccus\_s\_\_Coproccoccus\_comes  
 ARGORNPROST\_PWY\_\_arginine\_ornithine\_and\_proline\_interconversion  
 PWY\_7221\_\_guanosine\_ribonucleotides\_de\_novo\_biosynthesis\_g\_\_Coproccoccus\_s\_\_Coproccoccus\_comes  
 PWY\_724\_\_superpathway\_of\_L\_lysine\_L\_threonine\_and\_L\_methionine\_biosynthesis\_II\_g\_\_Methanobrevibacter\_smithii  
 P161\_PWY\_\_acetylene\_degradation\_unclassified  
 PWY\_2942\_\_L\_lysine\_biosynthesis\_III\_g\_\_Methanobrevibacter\_s\_\_Methanobrevibacter\_smithii  
 PWY\_5686\_\_UMP\_biosynthesis\_g\_\_Actinomyces\_s\_\_Actinomyces\_odontolyticus  
 PWY\_6387\_\_UDP\_N\_acetylmuramoyl\_pentapeptide\_biosynthesis\_I\_(meso\_diaminopimelate\_containing)\_g  
 ARG+POLYAMINE\_SYN\_\_superpathway\_of\_arginine\_and\_polyamine\_biosynthesis\_unclassified  
 DTDPRHAMSYN\_PWY\_\_dTDP\_L\_rhamnose\_biosynthesis\_I\_g\_\_Bacteroides\_s\_\_Bacteroides\_sp\_3\_2\_5  
 PWY\_5097\_\_L\_lysine\_biosynthesis\_VI\_g\_\_Methanobrevibacter\_s\_\_Methanobrevibacter\_smithii  
 SO4ASSIM\_PWY\_\_sulfate\_reduction\_I\_(assimilatory)\_unclassified  
 GLYCOLYSIS\_E\_D\_\_superpathway\_of\_glycolysis\_and\_Entner\_Doudoroff\_unclassified  
 PWY\_2941\_\_L\_lysine\_biosynthesis\_II\_g\_\_Methanobrevibacter\_s\_\_Methanobrevibacter\_smithii  
 1CMET2\_PWY\_\_N10\_formyl\_tetrahydrofolate\_biosynthesis\_g\_\_Streptococcus\_s\_\_Streptococcus\_thermophilus  
 PWY\_6609\_\_adenine\_and\_adenosine\_salvage\_III\_g\_\_Actinomyces\_s\_\_Actinomyces\_odontolyticus  
 GLUCUROCAT\_PWY\_\_superpathway\_of\_beta\_D\_glucuronide\_and\_D\_glucuronate\_degradation  
 THRESYN\_PWY\_\_superpathway\_of\_L\_threonine\_biosynthesis\_g\_\_Methanobrevibacter\_s\_\_Methanobrevibacter\_smithii  
 PWY\_7221\_\_guanosine\_ribonucleotides\_de\_novo\_biosynthesis\_g\_\_Bacteroides\_s\_\_Bacteroides\_sp\_3\_2\_5  
 GALACT\_GLUCUROCAT\_PWY\_\_superpathway\_of\_hexuronide\_and\_hexuronate\_degradation  
 ARGININE\_SYN4\_PWY\_\_L\_ornithine\_de\_novo\_biosynthesis\_g\_\_Bacteroides\_s\_\_Bacteroides\_sp\_3\_2\_5

PWY\_5198\_factor\_420\_biosynthesis  
 PWY\_5198\_factor\_420\_biosynthesis\_g\_Methanobrevibacter\_s\_Methanobrevibacter\_smithii  
 PWY\_2942\_L\_lysine\_biosynthesis\_III\_g\_Bacteroides\_s\_Bacteroides\_fragilis  
 COA\_PWY\_1\_coenzyme\_A\_biosynthesis\_II\_(mammalian)\_unclassified  
 PWY\_2942\_L\_lysine\_biosynthesis\_III\_g\_Actinomyces\_s\_Actinomyces\_odontolyticus  
 PWY\_6897\_thiamin\_salvage\_II\_g\_Methanobrevibacter\_s\_Methanobrevibacter\_smithii  
 PWY\_3001\_superpathway\_of\_L\_ileucine\_biosynthesis\_I\_g\_Methanobrevibacter\_s\_Methano  
 PWY\_5101\_L\_ileucine\_biosynthesis\_II\_g\_Methanobrevibacter\_s\_Methanobrevibacter\_smith  
 PWY\_5104\_L\_ileucine\_biosynthesis\_IV\_g\_Methanobrevibacter\_s\_Methanobrevibacter\_smit  
 PWY\_6121\_5\_aminimidazole\_ribonucleotide\_biosynthesis\_I\_g\_Methanobrevibacter\_s\_Metha  
 UNINTEGRATED\_g\_Methanobrevibacter\_s\_Methanobrevibacter\_smithii  
 PWY\_5189\_tetrapyrrole\_biosynthesis\_II\_(from\_glycine)\_g\_Methanobrevibacter\_s\_Methanobr  
 UNINTEGRATED\_unclassified  
 PWY\_7242\_D\_fructuronate\_degradation\_g\_Eubacterium\_s\_Eubacterium\_rectale  
 PWY\_7211\_superpathway\_of\_pyrimidine\_deoxyribonucleotides\_de\_novo\_biosynthesis\_unclassif  
 PWY\_6353\_purine\_nucleotides\_degradation\_II\_(aerobic)\_unclassified  
 PWY\_6122\_5\_aminimidazole\_ribonucleotide\_biosynthesis\_II\_g\_Methanobrevibacter\_s\_Meth  
 PWY\_6277\_superpathway\_of\_5\_aminimidazole\_ribonucleotide\_biosynthesis\_g\_Methanobrevi  
 PWY\_6123\_inosine\_5\_phosphate\_biosynthesis\_I\_g\_Bacteroides\_s\_Bacteroides\_sp\_3\_2\_5  
 BRANCHED\_CHAIN\_AA\_SYN\_PWY\_superpathway\_of\_branched\_amino\_acid\_biosynthesis\_g\_Me  
 PWY\_6122\_5\_aminimidazole\_ribonucleotide\_biosynthesis\_II\_g\_Actinomyces\_s\_Actinomyces  
 PWY\_6277\_superpathway\_of\_5\_aminimidazole\_ribonucleotide\_biosynthesis\_g\_Actinomyces\_s  
 PWY\_6151\_S\_adenosyl\_L\_methionine\_cycle\_I\_g\_Streptococcus\_s\_Streptococcus\_parasanguini  
 PWY\_6167\_flavin\_biosynthesis\_II\_(archaea)\_g\_Methanobrevibacter\_s\_Methanobrevibacter\_s  
 PWY\_5464\_superpathway\_of\_cytosolic\_glycolysis\_(plants)\_pyruvate\_dehydrogenase\_and\_TCA\_  
 DTDPRHAMSYN\_PWY\_dTDP\_L\_rhamnose\_biosynthesis\_I\_g\_Methanobrevibacter\_s\_Methanob  
 PWY\_241\_C4\_photosynthetic\_carbon\_assimilation\_cycle,\_NADP\_ME\_type\_unclassified  
 PWY\_6124\_inosine\_5\_phosphate\_biosynthesis\_II\_g\_Bacteroides\_s\_Bacteroides\_sp\_3\_2\_5  
 PWY\_7219\_adenosine\_ribonucleotides\_de\_novo\_biosynthesis\_g\_Methanobrevibacter\_s\_Meth  
 PWY\_7357\_thiamin\_formation\_from\_pyriothiamine\_and\_oxothiamine\_(yeast)\_g\_Methanobrevi  
 PWY\_5103\_L\_ileucine\_biosynthesis\_III\_g\_Methanobrevibacter\_s\_Methanobrevibacter\_smit  
 PWY\_5121\_superpathway\_of\_geranylgeranyl\_diphosphate\_biosynthesis\_II\_(via\_MEP)\_unclassif  
 METHANOGENESIS\_PWY\_methanogenesis\_from\_H2\_and\_CO2\_g\_Methanobrevibacter\_s\_Meth  
 METHANOGENESIS\_PWY\_methanogenesis\_from\_H2\_and\_CO2  
 HSERMETANA\_PWY\_L\_methionine\_biosynthesis\_III\_g\_Methanobrevibacter\_s\_Methanobrevib  
 ANAGLYCOLYSIS\_PWY\_glycolysis\_III\_(from\_glucose)\_unclassified  
 GLYCOGENSYNTH\_PWY\_glycogen\_biosynthesis\_I\_(from\_ADP\_D\_Glucose)\_unclassified  
 PANTO\_PWY\_phosphopantothenate\_biosynthesis\_I\_g\_Bacteroides\_s\_Bacteroides\_sp\_3\_2\_5  
 PWY\_5188\_tetrapyrrole\_biosynthesis\_I\_(from\_glutamate)\_g\_Methanobrevibacter\_s\_Methano  
 PWY\_6936\_seleno\_amino\_acid\_biosynthesis\_g\_Methanobrevibacter\_s\_Methanobrevibacter\_s  
 PWY\_5097\_L\_lysine\_biosynthesis\_VI\_g\_Bacteroides\_s\_Bacteroides\_fragilis  
 NONOXIPENT\_PWY\_pentose\_phosphate\_pathway\_(non\_oxidative\_branch)  
 PWY\_6549\_L\_glutamine\_biosynthesis\_III\_unclassified  
 PWY\_5005\_biotin\_biosynthesis\_II\_unclassified  
 ILEUSYN\_PWY\_L\_ileucine\_biosynthesis\_I\_(from\_threonine)\_g\_Methanobrevibacter\_s\_Meth  
 VALSYN\_PWY\_L\_valine\_biosynthesis\_g\_Methanobrevibacter\_s\_Methanobrevibacter\_smithii  
 HISTSYN\_PWY\_L\_histidine\_biosynthesis\_g\_Methanobrevibacter\_s\_Methanobrevibacter\_smit

PWY\_6305\_\_putrescine\_biosynthesis\_IV  
 FERMENTATION\_PWY\_\_mixed\_acid\_fermentation\_unclassified  
 PWY\_7208\_\_superpathway\_of\_pyrimidine\_nucleobases\_salvage\_unclassified  
 COA\_PWY\_\_coenzyme\_A\_biosynthesis\_I\_g\_Roseburia\_s\_Roseburia\_intestinalis  
 PWY0\_1296\_\_purine\_ribonucleosides\_degradation\_g\_Streptococcus\_s\_Streptococcus\_salivarius  
 PWY\_5686\_\_UMP\_biosynthesis\_unclassified  
 GALACTUROCAT\_PWY\_\_D\_galacturonate\_degradation\_I  
 PWY\_7286\_\_7\_(3\_aminopropanoate)\_wyosine\_biosynthesis  
 PWY\_7111\_\_pyruvate\_fermentation\_to\_isobutanol\_(engineered)\_g\_Methanobrevibacter\_s\_Methanobrevibacter  
 PWY\_6163\_\_chorismate\_biosynthesis\_from\_3\_dehydroquinate\_g\_Methanobrevibacter\_s\_Methanobrevibacter  
 PPGPPMET\_PWY\_\_ppGpp\_biosynthesis\_unclassified  
 PWY\_7357\_\_thiamin\_formation\_from\_pyriothiamine\_and\_oxythiamine\_(yeast)\_unclassified  
 PWY\_5505\_\_L\_glutamate\_and\_L\_glutamine\_biosynthesis  
 PWY\_6174\_\_mevalonate\_pathway\_II\_(archaea)  
 VALSYN\_PWY\_\_L\_valine\_biosynthesis\_g\_Streptococcus\_s\_Streptococcus\_salivarius  
 PWY\_5304\_\_superpathway\_of\_sulfur\_oxidation\_(Acidianus\_ambivalens)\_unclassified  
 PWY\_7187\_\_pyrimidine\_deoxyribonucleotides\_de\_novo\_biosynthesis\_II\_unclassified  
 PWY\_7111\_\_pyruvate\_fermentation\_to\_isobutanol\_(engineered)\_g\_Streptococcus\_s\_Streptococcus  
 PWY\_6507\_\_4\_deoxy\_L\_threo\_hex\_4\_enopyranuronate\_degradation  
 PWY\_6317\_\_galactose\_degradation\_I\_(Leloir\_pathway)\_unclassified  
 PWY\_6124\_\_inosine\_5\_\_phosphate\_biosynthesis\_II\_g\_Streptococcus\_s\_Streptococcus\_salivarius  
 PWY\_5505\_\_L\_glutamate\_and\_L\_glutamine\_biosynthesis\_unclassified  
 PWY\_6609\_\_adenine\_and\_adenosine\_salvage\_III\_g\_Streptococcus\_s\_Streptococcus\_salivarius  
 PWY\_841\_\_superpathway\_of\_purine\_nucleotides\_de\_novo\_biosynthesis\_I\_unclassified  
 PWY\_3841\_\_folate\_transformations\_II\_g\_Streptococcus\_s\_Streptococcus\_salivarius  
 NONMEVIPP\_PWY\_\_methylerythritol\_phosphate\_pathway\_I\_g\_Dorea\_s\_Dorea\_longicatena  
 PWY\_6609\_\_adenine\_and\_adenosine\_salvage\_III\_unclassified  
 PRPP\_PWY\_\_superpathway\_of\_histidine\_purine\_and\_pyrimidine\_biosynthesis\_unclassified  
 TRPSYN\_PWY\_\_L\_tryptophan\_biosynthesis\_g\_Bacteroides\_s\_Bacteroides\_sp\_3\_2\_5  
 DENOVPURINE2\_PWY\_\_superpathway\_of\_purine\_nucleotides\_de\_novo\_biosynthesis\_II\_unclassified  
 ASPASN\_PWY\_\_superpathway\_of\_L\_aspartate\_and\_L\_asparagine\_biosynthesis\_g\_Roseburia\_s\_Roseburia  
 NONOXIPENT\_PWY\_\_pentose\_phosphate\_pathway\_(non\_oxidative\_branch)\_unclassified  
 PWY\_5484\_\_glycolysis\_II\_(from\_fructose\_6\_phosphate)\_unclassified  
 PWY\_6527\_\_stachyose\_degradation\_unclassified  
 PWY\_5022\_\_4\_aminobutanoate\_degradation\_V  
 P162\_PWY\_\_L\_glutamate\_degradation\_V\_(via\_hydroxyglutarate)\_unclassified  
 UNINTEGRATED\_g\_Bacteroides\_s\_Bacteroides\_fragilis  
 PWY\_6123\_\_inosine\_5\_\_phosphate\_biosynthesis\_I\_g\_Streptococcus\_s\_Streptococcus\_salivarius  
 PWY\_7219\_\_adenosine\_ribonucleotides\_de\_novo\_biosynthesis\_g\_Streptococcus\_s\_Streptococcus  
 SULFATE\_CYS\_PWY\_\_superpathway\_of\_sulfate\_assimilation\_and\_cysteine\_biosynthesis\_unclassified  
 UDPNAGSYN\_PWY\_\_UDP\_N\_acetyl\_D\_glucosamine\_biosynthesis\_I\_g\_Streptococcus\_s\_Streptococcus  
 PWY\_6703\_\_preQ0\_biosynthesis\_unclassified  
 PWY\_5100\_\_pyruvate\_fermentation\_to\_acetate\_and\_lactate\_II\_g\_Actinomyces\_s\_Actinomyces  
 PWY0\_1297\_\_superpathway\_of\_purine\_deoxyribonucleosides\_degradation\_g\_Streptococcus\_s\_Streptococcus  
 PWY\_6936\_\_seleno\_amino\_acid\_biosynthesis\_unclassified  
 PWY\_7219\_\_adenosine\_ribonucleotides\_de\_novo\_biosynthesis\_g\_Actinomyces\_s\_Actinomyces  
 PWY\_1861\_\_formaldehyde\_assimilation\_II\_(RuMP\_Cycle)

PYRIDNUCSYN\_PWY\_\_NAD\_biosynthesis\_I\_(from\_aspartate)  
 PANTO\_PWY\_\_phosphopantothenate\_biosynthesis\_I\_unclassified  
 PWY\_724\_\_superpathway\_of\_L\_lysine,\_L\_threonine\_and\_L\_methionine\_biosynthesis\_II\_unclassified  
 PWY\_7219\_\_adenosine\_ribonucleotides\_de\_novo\_biosynthesis\_g\_Ruminococcus\_s\_Ruminococcus  
 PWY\_6151\_\_S\_adenosyl\_L\_methionine\_cycle\_I\_g\_Streptococcus\_s\_Streptococcus\_salivarius  
 PWY66\_422\_\_D\_galactose\_degradation\_V\_(Leloir\_pathway)\_unclassified  
 GLYCOLYSIS\_glycolysis\_I\_(from\_glucose\_6\_phosphate)\_unclassified  
 PANTOSYN\_PWY\_\_pantothenate\_and\_coenzyme\_A\_biosynthesis\_I\_g\_Blautia\_s\_Ruminococcus  
 PWY\_5676\_\_acetyl\_CoA\_fermentation\_to\_butanoate\_II\_unclassified  
 PWY\_7219\_\_adenosine\_ribonucleotides\_de\_novo\_biosynthesis\_unclassified  
 PWY\_5030\_\_L\_histidine\_degradation\_III\_unclassified  
 PWY\_5695\_\_urate\_biosynthesis\_inosine\_5\_phosphate\_degradation\_unclassified  
 P108\_PWY\_\_pyruvate\_fermentation\_to\_propanoate\_I\_unclassified  
 ANAEROFRUCAT\_PWY\_\_homolactic\_fermentation\_unclassified  
 PWY\_5667\_\_CDP\_diacylglycerol\_biosynthesis\_I\_g\_Roseburia\_s\_Roseburia\_intestinalis  
 PWY0\_1319\_\_CDP\_diacylglycerol\_biosynthesis\_II\_g\_Roseburia\_s\_Roseburia\_intestinalis  
 TRPSYN\_PWY\_\_L\_tryptophan\_biosynthesis  
 PWY\_6305\_\_putrescine\_biosynthesis\_IV\_g\_Methanobrevibacter\_s\_Methanobrevibacter\_smithii  
 PWY\_5100\_\_pyruvate\_fermentation\_to\_acetate\_and\_lactate\_II\_g\_Ruminococcus\_s\_Ruminococcus  
 PWY\_7221\_\_guanosine\_ribonucleotides\_de\_novo\_biosynthesis\_g\_Streptococcus\_s\_Streptococcus  
 PWY\_5384\_\_sucrose\_degradation\_IV\_(sucrose\_phosphorylase)\_g\_Roseburia\_s\_Roseburia\_intestinalis  
 PWY\_6737\_\_starch\_degradation\_V\_g\_Ruminococcus\_s\_Ruminococcus\_lactaris  
 NONMEVIPP\_PWY\_\_methylerythritol\_phosphate\_pathway\_I\_g\_Roseburia\_s\_Roseburia\_intestinalis  
 PWY0\_162\_\_superpathway\_of\_pyrimidine\_ribonucleotides\_de\_novo\_biosynthesis\_unclassified  
 NONOXIPENT\_PWY\_\_pentose\_phosphate\_pathway\_(non\_oxidative\_branch)\_g\_Roseburia\_s\_Roseburia\_intestinalis  
 VALSYN\_PWY\_\_L\_valine\_biosynthesis\_g\_Ruminococcus\_s\_Ruminococcus\_lactaris  
 PWY\_7111\_\_pyruvate\_fermentation\_to\_isobutanol\_(engineered)\_g\_Ruminococcus\_s\_Ruminococcus  
 GOLPDLCAT\_PWY\_\_superpathway\_of\_glycerol\_degradation\_to\_1,3\_propanediol\_unclassified  
 PWY\_5345\_\_superpathway\_of\_L\_methionine\_biosynthesis\_(by\_sulfhydrylation)\_unclassified  
 COA\_PWY\_1\_\_coenzyme\_A\_biosynthesis\_II\_(mammalian)\_g\_Roseburia\_s\_Roseburia\_intestinalis  
 COA\_PWY\_1\_\_coenzyme\_A\_biosynthesis\_II\_(mammalian)\_g\_Bifidobacterium\_s\_Bifidobacterium  
 PWY66\_398\_\_TCA\_cycle\_III\_(animals)  
 PWY\_6124\_\_inosine\_5\_phosphate\_biosynthesis\_II\_g\_Streptococcus\_s\_Streptococcus\_thermophilus  
 THRESYN\_PWY\_\_superpathway\_of\_L\_threonine\_biosynthesis\_unclassified  
 PEPTIDOLYCANSYN\_PWY\_\_peptidoglycan\_biosynthesis\_I\_(meso\_diaminopimelate\_containing)\_g  
 PWY\_7234\_\_inosine\_5\_phosphate\_biosynthesis\_III\_g\_Methanobrevibacter\_s\_Methanobrevibacter  
 PWY\_6122\_\_5\_aminimidazole\_ribonucleotide\_biosynthesis\_II\_g\_Streptococcus\_s\_Streptococcus  
 PWY\_6277\_\_superpathway\_of\_5\_aminimidazole\_ribonucleotide\_biosynthesis\_g\_Streptococcus  
 SER\_GLYSYN\_PWY\_\_superpathway\_of\_L\_serine\_and\_glycine\_biosynthesis\_I\_unclassified  
 PWY\_724\_\_superpathway\_of\_L\_lysine,\_L\_threonine\_and\_L\_methionine\_biosynthesis\_II\_g\_Blautia  
 P164\_PWY\_\_purine\_nucleobases\_degradation\_I\_(anaerobic)\_unclassified  
 PWY\_7196\_\_superpathway\_of\_pyrimidine\_ribonucleosides\_salvage\_unclassified  
 PWY\_5659\_\_GDP\_mannose\_biosynthesis\_g\_Roseburia\_s\_Roseburia\_intestinalis  
 UDPNAGSYN\_PWY\_\_UDP\_N\_acetyl\_D\_glucosamine\_biosynthesis\_I\_g\_Bifidobacterium\_s\_Bifidobacterium  
 PWY\_6123\_\_inosine\_5\_phosphate\_biosynthesis\_I\_g\_Streptococcus\_s\_Streptococcus\_thermophilus  
 PWY\_6151\_\_S\_adenosyl\_L\_methionine\_cycle\_I\_unclassified  
 PWY\_6386\_\_UDP\_N\_acetylmuramoyl\_pentapeptide\_biosynthesis\_II\_(lysine\_containing)\_g\_Ruminococcus

HISTSYN\_PWY\_\_L\_histidine\_biosynthesis\_g\_\_Streptococcus\_s\_\_Streptococcus\_salivarius  
VALSYN\_PWY\_\_L\_valine\_biosynthesis\_g\_\_Bifidobacterium\_s\_\_Bifidobacterium\_adolescentis  
PWY\_6387\_\_UDP\_N\_acetylmuramoyl\_pentapeptide\_biosynthesis\_I\_(meso\_diaminopimelate\_containing)\_g\_\_Streptococcus\_s\_\_Streptococcus\_salivarius  
PWY\_6124\_\_inosine\_5\_phosphate\_biosynthesis\_II\_g\_\_Methanobrevibacter\_s\_\_Methanobrevibacter\_ruminantium  
PWY\_5100\_\_pyruvate\_fermentation\_to\_acetate\_and\_lactate\_II\_g\_\_Roseburia\_s\_\_Roseburia\_intestinalis  
P124\_PWY\_\_Bifidobacterium\_shunt\_unclassified  
PWY\_6387\_\_UDP\_N\_acetylmuramoyl\_pentapeptide\_biosynthesis\_I\_(meso\_diaminopimelate\_containing)\_g\_\_Streptococcus\_s\_\_Streptococcus\_salivarius  
PWY\_6386\_\_UDP\_N\_acetylmuramoyl\_pentapeptide\_biosynthesis\_II\_(lysine\_containing)\_g\_\_Bifidobacterium\_s\_\_Bifidobacterium\_adolescentis  
PWY\_6124\_\_inosine\_5\_phosphate\_biosynthesis\_II\_unclassified  
PEPTIDOGLYCANSYN\_PWY\_\_peptidoglycan\_biosynthesis\_I\_(meso\_diaminopimelate\_containing)\_g\_\_Streptococcus\_s\_\_Streptococcus\_salivarius  
HISTSYN\_PWY\_\_L\_histidine\_biosynthesis\_g\_\_Bifidobacterium\_s\_\_Bifidobacterium\_adolescentis  
PWY\_7221\_\_guanosine\_ribose\_nucleotides\_de\_novo\_biosynthesis\_g\_\_Ruminococcus\_s\_\_Ruminococcus\_torques  
PYRIDNUCSYN\_PWY\_\_NAD\_biosynthesis\_I\_(from\_aspartate)\_unclassified  
PWY\_6121\_\_5\_aminimidazole\_ribose\_nucleotide\_biosynthesis\_I\_g\_\_Streptococcus\_s\_\_Streptococcus\_salivarius  
PWY4LZ\_257\_\_superpathway\_of\_fermentation\_(Chlamydomonas\_reinhardtii)\_unclassified  
PWY\_7219\_\_adenosine\_ribose\_nucleotides\_de\_novo\_biosynthesis\_g\_\_Streptococcus\_s\_\_Streptococcus\_salivarius  
NONMEVIPP\_PWY\_\_methylerythritol\_phosphate\_pathway\_I\_g\_\_Bifidobacterium\_s\_\_Bifidobacterium\_adolescentis  
PWY\_6163\_\_chorismate\_biosynthesis\_from\_3\_dehydroquinate\_g\_\_Eubacterium\_s\_\_Eubacterium\_rectale  
UNINTEGRATED\_g\_\_Eubacterium\_s\_\_Eubacterium\_rectale  
PWY\_6122\_\_5\_aminimidazole\_ribose\_nucleotide\_biosynthesis\_II\_g\_\_Streptococcus\_s\_\_Streptococcus\_salivarius  
PWY\_6277\_\_superpathway\_of\_5\_aminimidazole\_ribose\_nucleotide\_biosynthesis\_g\_\_Streptococcus\_s\_\_Streptococcus\_salivarius  
PWY\_6737\_\_starch\_degradation\_V\_g\_\_Roseburia\_s\_\_Roseburia\_intestinalis  
TRPSYN\_PWY\_\_L\_tryptophan\_biosynthesis\_g\_\_Roseburia\_s\_\_Roseburia\_intestinalis  
PWY\_7221\_\_guanosine\_ribose\_nucleotides\_de\_novo\_biosynthesis\_g\_\_Roseburia\_s\_\_Roseburia\_intestinalis  
PWY\_6122\_\_5\_aminimidazole\_ribose\_nucleotide\_biosynthesis\_II\_g\_\_Bifidobacterium\_s\_\_Bifidobacterium\_adolescentis  
PWY\_6277\_\_superpathway\_of\_5\_aminimidazole\_ribose\_nucleotide\_biosynthesis\_g\_\_Bifidobacterium\_s\_\_Bifidobacterium\_adolescentis  
DTDPRHAMSYN\_PWY\_\_dTDP\_L\_rhamnose\_biosynthesis\_I\_g\_\_Eubacterium\_s\_\_Eubacterium\_rectale  
GLYCOGENSYNTH\_PWY\_\_glycogen\_biosynthesis\_I\_(from\_ADP\_D\_Glucose)\_g\_\_Roseburia\_s\_\_Roseburia\_intestinalis  
THRESYN\_PWY\_\_superpathway\_of\_L\_threonine\_biosynthesis\_g\_\_Bifidobacterium\_s\_\_Bifidobacterium\_adolescentis  
PWY\_6123\_\_inosine\_5\_phosphate\_biosynthesis\_I\_unclassified  
SALVADEHYPOX\_PWY\_\_adenosine\_nucleotides\_degradation\_II\_g\_\_Roseburia\_s\_\_Roseburia\_intestinalis  
PWY\_5667\_\_CDP\_diacylglycerol\_biosynthesis\_I\_g\_\_Eubacterium\_s\_\_Eubacterium\_rectale  
PWY0\_1319\_\_CDP\_diacylglycerol\_biosynthesis\_II\_g\_\_Eubacterium\_s\_\_Eubacterium\_rectale  
PWY\_5097\_\_L\_lysine\_biosynthesis\_VI\_g\_\_Eubacterium\_s\_\_Eubacterium\_rectale  
PWY\_6124\_\_inosine\_5\_phosphate\_biosynthesis\_II\_g\_\_Streptococcus\_s\_\_Streptococcus\_parasanguinis  
PWY\_6151\_\_S\_adenosyl\_L\_methionine\_cycle\_I\_g\_\_Bifidobacterium\_s\_\_Bifidobacterium\_adolescentis  
PWY66\_422\_\_D\_galactose\_degradation\_V\_(Leloir\_pathway)\_g\_\_Eubacterium\_s\_\_Eubacterium\_rectale  
PWY\_6700\_\_queuosine\_biosynthesis\_unclassified  
PWY\_5695\_\_urate\_biosynthesis\_inosine\_5\_phosphate\_degradation\_g\_\_Roseburia\_s\_\_Roseburia\_intestinalis  
PWY\_6608\_\_guanosine\_nucleotides\_degradation\_III\_g\_\_Roseburia\_s\_\_Roseburia\_intestinalis  
PWY\_7219\_\_adenosine\_ribose\_nucleotides\_de\_novo\_biosynthesis\_g\_\_Streptococcus\_s\_\_Streptococcus\_salivarius  
ARO\_PWY\_\_chorismate\_biosynthesis\_I\_g\_\_Eubacterium\_s\_\_Eubacterium\_rectale  
PWY\_6737\_\_starch\_degradation\_V\_g\_\_Eubacterium\_s\_\_Eubacterium\_rectale  
PWY0\_1296\_\_purine\_ribose\_nucleosides\_degradation\_g\_\_Roseburia\_s\_\_Roseburia\_intestinalis  
COBALSYN\_PWY\_\_adenosylcobalamin\_salvage\_from\_cobinamide\_I\_g\_\_Eubacterium\_s\_\_Eubacterium\_rectale  
SALVADEHYPOX\_PWY\_\_adenosine\_nucleotides\_degradation\_II\_unclassified  
DTDPRHAMSYN\_PWY\_\_dTDP\_L\_rhamnose\_biosynthesis\_I\_unclassified

COMPLETE\_ARO\_PWY\_superpathway\_of\_aromatic\_amino\_acid\_biosynthesis\_g\_Eubacterium\_s  
 UNINTEGRATED\_g\_Ruminococcus\_s\_Ruminococcus\_sp\_5\_1\_39BFAA  
 PWY\_7219\_adenosine\_ribose\_nucleotides\_de\_novo\_biosynthesis\_g\_Bifidobacterium\_s\_Bifidobac  
 PWY\_7111\_pyruvate\_fermentation\_to\_isobutanol\_(engineered)\_g\_Eubacterium\_s\_Eubacteriu  
 VALSYN\_PWY\_L\_valine\_biosynthesis\_g\_Eubacterium\_s\_Eubacterium\_rectale  
 PWY\_5104\_L\_ileucine\_biosynthesis\_IV\_g\_Roseburia\_s\_Roseburia\_intestinalis  
 GLYCOGENSYNTH\_PWY\_glycogen\_biosynthesis\_I\_(from\_ADP\_D\_Glucose)\_g\_Eubacterium\_s\_Ei  
 POLYAMSYN\_PWY\_superpathway\_of\_polyamine\_biosynthesis\_I\_unclassified  
 PWY\_6123\_inosine\_5\_phosphate\_biosynthesis\_I\_g\_Streptococcus\_s\_Streptococcus\_parasang  
 PWY\_7234\_inosine\_5\_phosphate\_biosynthesis\_III\_g\_Streptococcus\_s\_Streptococcus\_parasar  
 PWY\_7219\_adenosine\_ribose\_nucleotides\_de\_novo\_biosynthesis\_g\_Eubacterium\_s\_Eubacterium  
 PWY\_7221\_guanosine\_ribose\_nucleotides\_de\_novo\_biosynthesis\_g\_Bifidobacterium\_s\_Bifidobac  
 PWY\_6595\_superpathway\_of\_guanosine\_nucleotides\_degradation\_(plants)\_unclassified  
 VALSYN\_PWY\_L\_valine\_biosynthesis\_g\_Roseburia\_s\_Roseburia\_intestinalis  
 PWY\_6121\_5\_aminimidazole\_ribose\_nucleotide\_biosynthesis\_I\_g\_Streptococcus\_s\_Streptococcu  
 PANTO\_PWY\_phosphopantothenate\_biosynthesis\_I\_g\_Eubacterium\_s\_Eubacterium\_rectale  
 PWY\_6151\_S\_adenosyl\_L\_methionine\_cycle\_I\_g\_Ruminococcus\_s\_Ruminococcus\_lactaris  
 PWY\_5367\_petroselinic\_acid\_biosynthesis\_g\_Eubacterium\_s\_Eubacterium\_rectale  
 TRPSYN\_PWY\_L\_tryptophan\_biosynthesis\_unclassified  
 PWY\_5188\_tetrapyrrole\_biosynthesis\_I\_(from\_glutamate)\_g\_Ruminococcus\_s\_Ruminococcus  
 PWY\_6608\_guanosine\_nucleotides\_degradation\_III\_unclassified  
 PYRIDNUCSYN\_PWY\_NAD\_biosynthesis\_I\_(from\_aspartate)\_g\_Roseburia\_s\_Roseburia\_intestir  
 PWY\_7111\_pyruvate\_fermentation\_to\_isobutanol\_(engineered)\_g\_Ruminococcus\_s\_Ruminococ  
 SER\_GLYSYN\_PWY\_superpathway\_of\_L\_serine\_and\_glycine\_biosynthesis\_I\_g\_Roseburia\_s\_Ro  
 PWY\_5097\_L\_lysine\_biosynthesis\_VI\_g\_Roseburia\_s\_Roseburia\_intestinalis  
 PWY\_1269\_CMP\_3\_deoxy\_D\_manno\_octulosonate\_biosynthesis\_I\_unclassified  
 PWY\_7003\_glycerol\_degradation\_to\_butanol  
 PWY\_7221\_guanosine\_ribose\_nucleotides\_de\_novo\_biosynthesis\_g\_Eubacterium\_s\_Eubacterium  
 PEPTIDOGLYCANSYN\_PWY\_peptidoglycan\_biosynthesis\_I\_(meso\_diaminopimelate\_containing)\_u  
 PWY\_7221\_guanosine\_ribose\_nucleotides\_de\_novo\_biosynthesis\_unclassified  
 CALVIN\_PWY\_Calvin\_Benson\_Bassham\_cycle\_unclassified  
 PWY\_6737\_starch\_degradation\_V  
 NONMEVIPP\_PWY\_methylerythritol\_phosphate\_pathway\_I\_g\_Eubacterium\_s\_Eubacterium\_re  
 PWY\_6609\_adenine\_and\_adenosine\_salvage\_III\_g\_Ruminococcus\_s\_Ruminococcus\_lactaris  
 PWY\_6121\_5\_aminimidazole\_ribose\_nucleotide\_biosynthesis\_I\_g\_Streptococcus\_s\_Streptococcu  
 PANTO\_PWY\_phosphopantothenate\_biosynthesis\_I\_g\_Roseburia\_s\_Roseburia\_intestinalis  
 PWY\_6387\_UDP\_N\_acetylmuramoyl\_pentapeptide\_biosynthesis\_I\_(meso\_diaminopimelate\_coni  
 PWY\_6386\_UDP\_N\_acetylmuramoyl\_pentapeptide\_biosynthesis\_II\_(lysine\_containing)\_g\_Euba  
 COA\_PWY\_1\_coenzyme\_A\_biosynthesis\_II\_(mammalian)\_g\_Eubacterium\_s\_Eubacterium\_rect  
 PWY\_6163\_chorismate\_biosynthesis\_from\_3\_dehydroquinic\_acid\_g\_Roseburia\_s\_Roseburia\_intes  
 PWY\_6122\_5\_aminimidazole\_ribose\_nucleotide\_biosynthesis\_II\_g\_Streptococcus\_s\_Streptococc  
 PWY\_6277\_superpathway\_of\_5\_aminimidazole\_ribose\_nucleotide\_biosynthesis\_g\_Streptococcus  
 UNINTEGRATED\_g\_Roseburia\_s\_Roseburia\_intestinalis  
 PWY0\_1296\_purine\_ribose\_nucleosides\_degradation\_g\_Eubacterium\_s\_Eubacterium\_rectale  
 PWY\_5686\_UMP\_biosynthesis\_g\_Eubacterium\_s\_Eubacterium\_rectale  
 VALSYN\_PWY\_L\_valine\_biosynthesis\_g\_Ruminococcus\_s\_Ruminococcus\_sp\_5\_1\_39BFAA  
 PWY\_6386\_UDP\_N\_acetylmuramoyl\_pentapeptide\_biosynthesis\_II\_(lysine\_containing)\_unclassif

PANTOSYN\_PWY\_\_pantothenate\_and\_coenzyme\_A\_biosynthesis\_I\_unclassified  
OANTIGEN\_PWY\_\_O\_antigen\_building\_blocks\_biosynthesis\_(E\_coli)\_g\_\_Bifidobacterium\_s\_\_Bifi  
HISTSYN\_PWY\_\_L\_histidine\_biosynthesis\_unclassified  
PWY\_6151\_\_S\_adenosyl\_L\_methionine\_cycle\_I\_g\_\_Eubacterium\_s\_\_Eubacterium\_rectale  
PWY\_6151\_\_S\_adenosyl\_L\_methionine\_cycle\_I\_g\_\_Roseburia\_s\_\_Roseburia\_intestinalis  
PWY\_7219\_\_adenosine\_ribose\_nucleotides\_de\_novo\_biosynthesis\_g\_\_Roseburia\_s\_\_Roseburia\_inte  
PWY\_7199\_\_pyrimidine\_deoxyribonucleosides\_salvage\_g\_\_Streptococcus\_s\_\_Streptococcus\_para  
COMPLETE\_ARO\_PWY\_\_superpathway\_of\_aromatic\_amino\_acid\_biosynthesis\_g\_\_Roseburia\_s\_\_R  
PWY\_7219\_\_adenosine\_ribose\_nucleotides\_de\_novo\_biosynthesis\_g\_\_Ruminococcus\_s\_\_Ruminococ  
PWY\_7221\_\_guanosine\_ribose\_nucleotides\_de\_novo\_biosynthesis\_g\_\_Streptococcus\_s\_\_Streptococ  
PWY\_6387\_\_UDP\_N\_acetylmuramoyl\_pentapeptide\_biosynthesis\_I\_(meso\_diaminopimelate\_cont  
PWY\_6121\_\_5\_aminimidazole\_ribose\_nucleotide\_biosynthesis\_I\_g\_\_Roseburia\_s\_\_Roseburia\_intes  
PWY\_2942\_\_L\_lysine\_biosynthesis\_III\_g\_\_Ruminococcus\_s\_\_Ruminococcus\_sp\_5\_1\_39BFAA  
ARO\_PWY\_\_chorismate\_biosynthesis\_I\_g\_\_Roseburia\_s\_\_Roseburia\_intestinalis  
PWY\_6163\_\_chorismate\_biosynthesis\_from\_3\_dehydroquinate\_g\_\_Ruminococcus\_s\_\_Ruminococ  
PWY\_6737\_\_starch\_degradation\_V\_g\_\_Ruminococcus\_s\_\_Ruminococcus\_sp\_5\_1\_39BFAA  
PWY\_5973\_\_cis\_vaccenate\_biosynthesis\_g\_\_Eubacterium\_s\_\_Eubacterium\_rectale  
PWY\_7111\_\_pyruvate\_fermentation\_to\_isobutanol\_(engineered)\_unclassified  
HISDEG\_PWY\_\_L\_histidine\_degradation\_I\_unclassified  
PWY\_6122\_\_5\_aminimidazole\_ribose\_nucleotide\_biosynthesis\_II\_g\_\_Roseburia\_s\_\_Roseburia\_intes  
PWY\_6277\_\_superpathway\_of\_5\_aminimidazole\_ribose\_nucleotide\_biosynthesis\_g\_\_Roseburia\_s\_\_  
ILEUSYN\_PWY\_\_L\_isoleucine\_biosynthesis\_I\_(from\_threonine)\_unclassified  
VALSYN\_PWY\_\_L\_valine\_biosynthesis\_unclassified  
PWY\_7208\_\_superpathway\_of\_pyrimidine\_nucleobases\_salvage\_g\_\_Roseburia\_s\_\_Roseburia\_inte  
PWY\_3001\_\_superpathway\_of\_L\_isoleucine\_biosynthesis\_I\_unclassified  
PWY\_6317\_\_galactose\_degradation\_I\_(Leloir\_pathway)\_g\_\_Roseburia\_s\_\_Roseburia\_intestinalis  
PWY66\_422\_\_D\_galactose\_degradation\_V\_(Leloir\_pathway)\_g\_\_Roseburia\_s\_\_Roseburia\_intestin  
PWY\_3841\_\_folate\_transformations\_II\_g\_\_Streptococcus\_s\_\_Streptococcus\_parasanguinis  
PWY\_5097\_\_L\_lysine\_biosynthesis\_VI\_g\_\_Ruminococcus\_s\_\_Ruminococcus\_sp\_5\_1\_39BFAA  
BRANCHED\_CHAIN\_AA\_SYN\_PWY\_\_superpathway\_of\_branched\_amino\_acid\_biosynthesis\_g\_\_Str  
PWY0\_1296\_\_purine\_ribose\_nucleosides\_degradation\_g\_\_Ruminococcus\_s\_\_Ruminococcus\_sp\_5\_1\_3  
PWY\_5189\_\_tetrapyrrole\_biosynthesis\_II\_(from\_glycine)\_unclassified  
PWY\_7229\_\_superpathway\_of\_adenosine\_nucleotides\_de\_novo\_biosynthesis\_I\_g\_\_Streptococcus  
COMPLETE\_ARO\_PWY\_\_superpathway\_of\_aromatic\_amino\_acid\_biosynthesis\_g\_\_Ruminococcus\_  
COA\_PWY\_\_coenzyme\_A\_biosynthesis\_I\_unclassified  
PWY\_5100\_\_pyruvate\_fermentation\_to\_acetate\_and\_lactate\_II\_g\_\_Streptococcus\_s\_\_Streptococ  
PWY\_5686\_\_UMP\_biosynthesis\_g\_\_Ruminococcus\_s\_\_Ruminococcus\_sp\_5\_1\_39BFAA  
ARO\_PWY\_\_chorismate\_biosynthesis\_I\_g\_\_Ruminococcus\_s\_\_Ruminococcus\_sp\_5\_1\_39BFAA  
NONOXIPENT\_PWY\_\_pentose\_phosphate\_pathway\_(non\_oxidative\_branch)\_g\_\_Ruminococcus\_s\_  
PWY\_5103\_\_L\_isoleucine\_biosynthesis\_III\_g\_\_Streptococcus\_s\_\_Streptococcus\_parasanguinis  
NONMEVIPP\_PWY\_\_methylerythritol\_phosphate\_pathway\_I\_g\_\_Ruminococcus\_s\_\_Ruminococcus  
PWY66\_399\_\_gluconeogenesis\_III  
PWY0\_1319\_\_CDP\_diacylglycerol\_biosynthesis\_II\_unclassified  
PWY\_5667\_\_CDP\_diacylglycerol\_biosynthesis\_I\_unclassified  
COBALSYN\_PWY\_\_adenosylcobalamin\_salvage\_from\_cobinamide\_I\_unclassified  
UNINTEGRATED\_g\_\_Streptococcus\_s\_\_Streptococcus\_parasanguinis  
PWY\_5667\_\_CDP\_diacylglycerol\_biosynthesis\_I\_g\_\_Ruminococcus\_s\_\_Ruminococcus\_sp\_5\_1\_39E



PWY0\_1319\_\_CDP\_diacylglycerol\_biosynthesis\_II\_g\_\_Ruminococcus\_s\_\_Ruminococcus\_sp\_5\_1\_3!  
PWY\_6609\_\_adenine\_and\_adenosine\_salvage\_III\_g\_\_Streptococcus\_s\_\_Streptococcus\_parasangu  
PWY0\_1296\_\_purine\_ribonucleosides\_degradation\_g\_\_Streptococcus\_s\_\_Streptococcus\_parasang  
PWY\_5659\_\_GDP\_mannose\_biosynthesis\_unclassified  
ILEUSYN\_PWY\_\_L\_isoleucine\_biosynthesis\_I\_(from\_threonine)\_g\_\_Streptococcus\_s\_\_Streptococc  
VALSYN\_PWY\_\_L\_valine\_biosynthesis\_g\_\_Streptococcus\_s\_\_Streptococcus\_parasanguinis  
PWY\_7357\_\_thiamin\_formation\_from\_pyriothiamine\_and\_oxythiamine\_(yeast)\_g\_\_Roseburia\_s\_\_I  
PWY\_6386\_\_UDP\_N\_acetylmuramoyl\_pentapeptide\_biosynthesis\_II\_(lysine\_containing)\_g\_\_Rumi  
PWY\_6609\_\_adenine\_and\_adenosine\_salvage\_III\_g\_\_Streptococcus\_s\_\_Streptococcus\_thermophi  
PEPTIDOLYCANSYN\_PWY\_\_peptidoglycan\_biosynthesis\_I\_(meso\_diaminopimelate\_containing)\_g  
PWY\_7221\_\_guanosine\_ribonucleotides\_de\_novo\_biosynthesis\_g\_\_Ruminococcus\_s\_\_Ruminococ  
PANTO\_PWY\_\_phosphopantothenate\_biosynthesis\_I\_g\_\_Ruminococcus\_s\_\_Ruminococcus\_lactari  
PWY\_6317\_\_galactose\_degradation\_I\_(Leloir\_pathway)\_g\_\_Streptococcus\_s\_\_Streptococcus\_ther  
PWY66\_422\_\_D\_galactose\_degradation\_V\_(Leloir\_pathway)\_g\_\_Streptococcus\_s\_\_Streptococcus  
PWY\_621\_\_sucrose\_degradation\_III\_(sucrose\_invertase)\_g\_\_Streptococcus\_s\_\_Streptococcus\_par  
UNINTEGRATED\_g\_\_Streptococcus\_s\_\_Streptococcus\_thermophilus  
PWY\_6387\_\_UDP\_N\_acetylmuramoyl\_pentapeptide\_biosynthesis\_I\_(meso\_diaminopimelate\_cont  
PWY\_7228\_\_superpathway\_of\_guanosine\_nucleotides\_de\_novo\_biosynthesis\_I\_g\_\_Streptococcus  
NONMEVIPP\_PWY\_\_methylerythritol\_phosphate\_pathway\_I\_g\_\_Bifidobacterium\_s\_\_Bifidobacter  
PWY\_5667\_\_CDP\_diacylglycerol\_biosynthesis\_I\_g\_\_Ruminococcus\_s\_\_Ruminococcus\_lactaris  
PWY0\_1319\_\_CDP\_diacylglycerol\_biosynthesis\_II\_g\_\_Ruminococcus\_s\_\_Ruminococcus\_lactaris  
PWY\_6386\_\_UDP\_N\_acetylmuramoyl\_pentapeptide\_biosynthesis\_II\_(lysine\_containing)\_g\_\_Strep  
TCA\_\_TCA\_cycle\_I\_(prokaryotic)\_unclassified  
COMPLETE\_ARO\_PWY\_\_superpathway\_of\_aromatic\_amino\_acid\_biosynthesis\_g\_\_Streptococcus  
PWY\_7229\_\_superpathway\_of\_adenosine\_nucleotides\_de\_novo\_biosynthesis\_I\_g\_\_Streptococcus  
PWY\_7208\_\_superpathway\_of\_pyrimidine\_nucleobases\_salvage\_g\_\_Streptococcus\_s\_\_Streptococ  
PWY0\_1061\_\_superpathway\_of\_L\_alanine\_biosynthesis\_g\_\_Streptococcus\_s\_\_Streptococcus\_para  
VALSYN\_PWY\_\_L\_valine\_biosynthesis\_g\_\_Streptococcus\_s\_\_Streptococcus\_thermophilus  
PWY\_5177\_\_glutaryl\_CoA\_degradation\_unclassified  
TRPSYN\_PWY\_\_L\_tryptophan\_biosynthesis\_g\_\_Streptococcus\_s\_\_Streptococcus\_parasanguinis  
PWY\_6122\_\_5\_aminoimidazole\_ribonucleotide\_biosynthesis\_II\_unclassified  
PWY\_6277\_\_superpathway\_of\_5\_aminoimidazole\_ribonucleotide\_biosynthesis\_unclassified  
PWY\_7197\_\_pyrimidine\_deoxyribonucleotide\_phosphorylation\_g\_\_Streptococcus\_s\_\_Streptococ  
PWY\_6121\_\_5\_aminoimidazole\_ribonucleotide\_biosynthesis\_I\_unclassified  
ARO\_PWY\_\_chorismate\_biosynthesis\_I\_g\_\_Streptococcus\_s\_\_Streptococcus\_salivarius  
PWY\_7228\_\_superpathway\_of\_guanosine\_nucleotides\_de\_novo\_biosynthesis\_I\_g\_\_Streptococcus  
COA\_PWY\_1\_\_coenzyme\_A\_biosynthesis\_II\_(mammalian)\_g\_\_Ruminococcus\_s\_\_Ruminococcus\_s  
PWY\_6387\_\_UDP\_N\_acetylmuramoyl\_pentapeptide\_biosynthesis\_I\_(meso\_diaminopimelate\_cont  
PWY\_5030\_\_L\_histidine\_degradation\_III\_g\_\_Streptococcus\_s\_\_Streptococcus\_parasanguinis  
PWY\_7111\_\_pyruvate\_fermentation\_to\_isobutanol\_(engineered)\_g\_\_Streptococcus\_s\_\_Streptoco  
PWY\_6386\_\_UDP\_N\_acetylmuramoyl\_pentapeptide\_biosynthesis\_II\_(lysine\_containing)\_g\_\_Strep  
UDPNAGSYN\_PWY\_\_UDP\_N\_acetyl\_D\_glucosamine\_biosynthesis\_I\_g\_\_Streptococcus\_s\_\_Streptoc  
LACTOSECAT\_PWY\_\_lactose\_and\_galactose\_degradation\_I\_g\_\_Streptococcus\_s\_\_Streptococcus\_p  
ARO\_PWY\_\_chorismate\_biosynthesis\_I\_g\_\_Streptococcus\_s\_\_Streptococcus\_thermophilus  
PWY\_6163\_\_chorismate\_biosynthesis\_from\_3\_dehydroquinone\_g\_\_Streptococcus\_s\_\_Streptococ  
PWY\_6151\_\_S\_adenosyl\_L\_methionine\_cycle\_I\_g\_\_Ruminococcus\_s\_\_Ruminococcus\_sp\_5\_1\_39E  
COMPLETE\_ARO\_PWY\_\_superpathway\_of\_aromatic\_amino\_acid\_biosynthesis\_g\_\_Streptococcus\_

PWY\_6163\_\_chorismate\_biosynthesis\_from\_3\_dehydroquinone\_g\_\_Streptococcus\_s\_\_Streptococcus\_pantothenate\_biosynthesis\_I\_g\_\_Ruminococcus\_s\_\_Ruminococcus\_sp\_5...  
 PWY\_5188\_\_tetrapyrrole\_biosynthesis\_I\_(from\_glutamate)\_unclassified  
 PWY\_7208\_\_superpathway\_of\_pyrimidine\_nucleobases\_salvage\_g\_\_Streptococcus\_s\_\_Streptococcus\_glycolysis\_IV\_(plant\_cytosol)\_unclassified  
 POLYAMINSYN3\_PWY\_\_superpathway\_of\_polyamine\_biosynthesis\_II  
 HISDEG\_PWY\_\_L\_histidine\_degradation\_I\_g\_\_Streptococcus\_s\_\_Streptococcus\_parasanguinis  
 PWY\_6737\_\_starch\_degradation\_V\_g\_\_Streptococcus\_s\_\_Streptococcus\_parasanguinis  
 UNINTEGRATED\_g\_\_Faecalibacterium\_s\_\_Faecalibacterium\_prausnitzii  
 BRANCHED\_CHAIN\_AA\_SYN\_PWY\_\_superpathway\_of\_branched\_amino\_acid\_biosynthesis\_unclassified  
 PWY\_4981\_\_L\_proline\_biosynthesis\_II\_(from\_arginine)\_g\_\_Streptococcus\_s\_\_Streptococcus\_parasanguinis  
 PWY\_7197\_\_pyrimidine\_deoxyribonucleotide\_phosphorylation\_g\_\_Streptococcus\_s\_\_Streptococcus\_pantothenate\_biosynthesis\_II\_g\_\_Streptococcus\_s\_\_Streptococcus\_pantothenate\_biosynthesis\_II...  
 PWY0\_1586\_\_peptidoglycan\_maturation\_(meso\_diaminopimelate\_containing)\_unclassified  
 PWY\_3841\_\_folate\_transformations\_II\_g\_\_Streptococcus\_s\_\_Streptococcus\_thermophilus  
 HISDEG\_PWY\_\_L\_histidine\_degradation\_I  
 COMPLETE\_ARO\_PWY\_\_superpathway\_of\_aromatic\_amino\_acid\_biosynthesis\_g\_\_Streptococcus\_s\_\_Streptococcus\_pantothenate\_biosynthesis\_I\_g\_\_Streptococcus\_s\_\_Streptococcus\_parasanguinis  
 PWY\_5177\_\_glutaryl\_CoA\_degradation  
 TRNA\_CHARGING\_PWY\_\_tRNA\_charging\_unclassified  
 PWY\_6163\_\_chorismate\_biosynthesis\_from\_3\_dehydroquinone\_g\_\_Streptococcus\_s\_\_Streptococcus\_pantothenate\_biosynthesis\_II\_g\_\_Streptococcus\_s\_\_Streptococcus\_pantothenate\_biosynthesis\_II...  
 PWY\_6590\_\_superpathway\_of\_Clostridium\_acetobutylicum\_acidogenic\_fermentation  
 PWY\_7237\_\_myo\_,\_chiro\_ and \_scillo\_inositol\_degradation  
 CRNFORCAT\_PWY\_\_creatinine\_degradation\_I\_unclassified  
 CENTFERM\_PWY\_\_pyruvate\_fermentation\_to\_butanoate  
 PWY\_6527\_\_stachyose\_degradation\_g\_\_Dorea\_s\_\_Dorea\_longicatena  
 PWY\_5103\_\_L\_isoleucine\_biosynthesis\_III\_unclassified  
 PWY0\_1297\_\_superpathway\_of\_purine\_deoxyribonucleosides\_degradation\_g\_\_Streptococcus\_s\_\_Streptococcus\_pantothenate\_biosynthesis\_II\_g\_\_Streptococcus\_s\_\_Streptococcus\_pantothenate\_biosynthesis\_II...  
 PWY0\_1296\_\_purine\_ribonucleosides\_degradation\_unclassified  
 PEPTIDOGLYCANSYN\_PWY\_\_peptidoglycan\_biosynthesis\_I\_(meso\_diaminopimelate\_containing)\_g\_\_Streptococcus\_s\_\_Streptococcus\_pantothenate\_biosynthesis\_II\_g\_\_Streptococcus\_s\_\_Streptococcus\_pantothenate\_biosynthesis\_II...  
 HSERMETANA\_PWY\_\_L\_methionine\_biosynthesis\_III\_unclassified  
 PWY\_6703\_\_preQ0\_biosynthesis\_g\_\_Streptococcus\_s\_\_Streptococcus\_salivarius  
 PWY\_6737\_\_starch\_degradation\_V\_unclassified  
 COA\_PWY\_1\_\_coenzyme\_A\_biosynthesis\_II\_(mammalian)\_g\_\_Streptococcus\_s\_\_Streptococcus\_pantothenate\_biosynthesis\_II\_g\_\_Streptococcus\_s\_\_Streptococcus\_pantothenate\_biosynthesis\_II...  
 PWY\_7209\_\_superpathway\_of\_pyrimidine\_ribonucleosides\_degradation  
 UNINTEGRATED\_g\_\_Ruminococcus\_s\_\_Ruminococcus\_bromii  
 GLUDEG\_I\_PWY\_\_GABA\_shunt  
 PWY\_5101\_\_L\_isoleucine\_biosynthesis\_II\_unclassified  
 PWY\_6628\_\_superpathway\_of\_L\_phenylalanine\_biosynthesis\_g\_\_Streptococcus\_s\_\_Streptococcus\_pantothenate\_biosynthesis\_II\_g\_\_Streptococcus\_s\_\_Streptococcus\_pantothenate\_biosynthesis\_II...  
 PWY\_6163\_\_chorismate\_biosynthesis\_from\_3\_dehydroquinone\_unclassified  
 HSERMETANA\_PWY\_\_L\_methionine\_biosynthesis\_III  
 PWY\_5686\_\_UMP\_biosynthesis\_g\_\_Streptococcus\_s\_\_Streptococcus\_parasanguinis  
 PWY\_7237\_\_myo\_,\_chiro\_ and \_scillo\_inositol\_degradation\_unclassified  
 GLCMANNANAUT\_PWY\_\_superpathway\_of\_N\_acetylglucosamine,\_N\_acetylmannosamine\_and\_N\_acetylglucosamine\_g\_\_Streptococcus\_s\_\_Streptococcus\_pantothenate\_biosynthesis\_II\_g\_\_Streptococcus\_s\_\_Streptococcus\_pantothenate\_biosynthesis\_II...  
 CALVIN\_PWY\_\_Calvin\_Benson\_Bassham\_cycle\_g\_\_Faecalibacterium\_s\_\_Faecalibacterium\_prausnitzii  
 PYRIDNUCSYN\_PWY\_\_NAD\_biosynthesis\_I\_(from\_aspartate)\_g\_\_Ruminococcus\_s\_\_Ruminococcus\_pantothenate\_biosynthesis\_II\_g\_\_Streptococcus\_s\_\_Streptococcus\_pantothenate\_biosynthesis\_II...  
 NONOXIPENT\_PWY\_\_pentose\_phosphate\_pathway\_(non\_oxidative\_branch)\_g\_\_Ruminococcus\_s\_\_Ruminococcus\_pantothenate\_biosynthesis\_II\_g\_\_Streptococcus\_s\_\_Streptococcus\_pantothenate\_biosynthesis\_II...  
 NONMEVIPP\_PWY\_\_methylerythritol\_phosphate\_pathway\_I\_unclassified

COMPLETE\_ARO\_PWY\_superpathway\_of\_aromatic\_amino\_acid\_biosynthesis\_unclassified  
 PWY\_5304\_superpathway\_of\_sulfur\_oxidation\_(Acidianus\_ambivalens)\_g\_Ruminococcus\_s\_R  
 PWY\_7219\_adenosine\_ribose\_nucleotides\_de\_novo\_biosynthesis\_g\_Ruminococcus\_s\_Ruminococ  
 PWY\_1042\_glycolysis\_IV\_(plant\_cytosol)\_g\_Faecalibacterium\_s\_Faecalibacterium\_prausnitzii  
 PWY\_1042\_glycolysis\_IV\_(plant\_cytosol)\_g\_Ruminococcus\_s\_Ruminococcus\_bromii  
 ARO\_PWY\_chorismate\_biosynthesis\_I\_unclassified  
 GLCMANNANAUT\_PWY\_superpathway\_of\_N\_acetylglucosamine,\_N\_acetylmannosamine\_and\_N  
 PWY\_5188\_tetrapyrrole\_biosynthesis\_I\_(from\_glutamate)\_g\_Ruminococcus\_s\_Ruminococcus  
 COA\_PWY\_coenzyme\_A\_biosynthesis\_I\_g\_Streptococcus\_s\_Streptococcus\_parasanguinis  
 PWY\_6123\_inosine\_5\_phosphate\_biosynthesis\_I\_g\_Faecalibacterium\_s\_Faecalibacterium\_pra  
 PWY\_4242\_pantothenate\_and\_coenzyme\_A\_biosynthesis\_III\_g\_Streptococcus\_s\_Streptococcu  
 PWY\_6969\_TCA\_cycle\_V\_(2\_oxoglutarate\_ferredoxin\_oxidoreductase)\_unclassified  
 PWY\_6124\_inosine\_5\_phosphate\_biosynthesis\_II\_g\_Faecalibacterium\_s\_Faecalibacterium\_pra  
 CRNFORCAT\_PWY\_creatinine\_degradation\_I  
 CALVIN\_PWY\_Calvin\_Benson\_Bassham\_cycle\_g\_Ruminococcus\_s\_Ruminococcus\_bromii  
 GALACTUROCAT\_PWY\_D\_galacturonate\_degradation\_I\_g\_Faecalibacterium\_s\_Faecalibacteriu  
 PWY\_5686\_UMP\_biosynthesis\_g\_Ruminococcus\_s\_Ruminococcus\_bromii  
 SER\_GLYSYN\_PWY\_superpathway\_of\_L\_serine\_and\_glycine\_biosynthesis\_I\_g\_Ruminococcus\_s  
 PWY0\_1296\_purine\_ribose\_nucleosides\_degradation\_g\_Streptococcus\_s\_Streptococcus\_thermop  
 HISTSYN\_PWY\_L\_histidine\_biosynthesis\_g\_Ruminococcus\_s\_Ruminococcus\_bromii  
 PWY\_6151\_S\_adenosyl\_L\_methionine\_cycle\_I\_g\_Ruminococcus\_s\_Ruminococcus\_bromii  
 GALACT\_GLUUROCAT\_PWY\_superpathway\_of\_hexuronide\_and\_hexuronate\_degradation\_g\_F  
 PWY\_6151\_S\_adenosyl\_L\_methionine\_cycle\_I\_g\_Dorea\_s\_Dorea\_longicatena  
 PWY\_6151\_S\_adenosyl\_L\_methionine\_cycle\_I\_g\_Bacteroides\_s\_Bacteroides\_vulgatus  
 PWY\_6609\_adenine\_and\_adenosine\_salvage\_III\_g\_Faecalibacterium\_s\_Faecalibacterium\_prau  
 PWY\_621\_sucrose\_degradation\_III\_(sucrose\_invertase)\_g\_Faecalibacterium\_s\_Faecalibacteriu  
 PWY\_6737\_starch\_degradation\_V\_g\_Ruminococcus\_s\_Ruminococcus\_bromii  
 PWY\_7242\_D\_fructuronate\_degradation\_g\_Faecalibacterium\_s\_Faecalibacterium\_prausnitzii  
 PWY\_7282\_4\_amino\_2\_methyl\_5\_phosphomethylpyrimidine\_biosynthesis\_(yeast)  
 HOMOSER\_METSYN\_PWY\_L\_methionine\_biosynthesis\_I\_g\_Ruminococcus\_s\_Ruminococcus\_br  
 GLUCUROCAT\_PWY\_superpathway\_of\_beta\_D\_glucuronide\_and\_D\_glucuronate\_degradation  
 ILEUSYN\_PWY\_L\_isoleucine\_biosynthesis\_I\_(from\_threonine)\_g\_Faecalibacterium\_s\_Faecaliba  
 VALSYN\_PWY\_L\_valine\_biosynthesis\_g\_Faecalibacterium\_s\_Faecalibacterium\_prausnitzii  
 PWY\_7219\_adenosine\_ribose\_nucleotides\_de\_novo\_biosynthesis\_g\_Faecalibacterium\_s\_Faecalib  
 PWY\_6737\_starch\_degradation\_V\_g\_Faecalibacterium\_s\_Faecalibacterium\_prausnitzii  
 BRANCHED\_CHAIN\_AA\_SYN\_PWY\_superpathway\_of\_branched\_amino\_acid\_biosynthesis\_g\_Fae  
 PWY\_6317\_galactose\_degradation\_I\_(Leloir\_pathway)\_g\_Ruminococcus\_s\_Ruminococcus\_bro  
 PWY66\_422\_D\_galactose\_degradation\_V\_(Leloir\_pathway)\_g\_Ruminococcus\_s\_Ruminococcus  
 DTDPRHAMSYN\_PWY\_dTDP\_L\_rhamnose\_biosynthesis\_I\_g\_Faecalibacterium\_s\_Faecalibacteri  
 COA\_PWY\_1\_coenzyme\_A\_biosynthesis\_II\_(mammalian)\_g\_Bacteroides\_s\_Bacteroides\_vulgat  
 PWY\_5686\_UMP\_biosynthesis\_g\_Faecalibacterium\_s\_Faecalibacterium\_prausnitzii  
 PWY\_3001\_superpathway\_of\_L\_isoleucine\_biosynthesis\_I\_g\_Faecalibacterium\_s\_Faecalibacte  
 THRESYN\_PWY\_superpathway\_of\_L\_threonine\_biosynthesis\_g\_Faecalibacterium\_s\_Faecalibac  
 PWY\_6317\_galactose\_degradation\_I\_(Leloir\_pathway)\_g\_Faecalibacterium\_s\_Faecalibacteriu  
 PWY66\_422\_D\_galactose\_degradation\_V\_(Leloir\_pathway)\_g\_Faecalibacterium\_s\_Faecalibacte  
 PWY\_5103\_L\_isoleucine\_biosynthesis\_III\_g\_Faecalibacterium\_s\_Faecalibacterium\_prausnitzii  
 NONOXIPENT\_PWY\_pentose\_phosphate\_pathway\_(non\_oxidative\_branch)\_g\_Faecalibacterium

PWY\_7357\_\_thiamin\_formation\_from\_pyriothiamine\_and\_oxythiamine\_(yeast)\_g\_\_Ruminococcus

PWY\_6386\_\_UDP\_N\_acetylmuramoyl\_pentapeptide\_biosynthesis\_II\_(lysine\_containing)\_g\_\_Faecalibacterium

PWY\_5695\_\_urate\_biosynthesis\_inosine\_5\_phosphate\_degradation\_g\_\_Bacteroides\_s\_\_Bacteroides

PWY\_7111\_\_pyruvate\_fermentation\_to\_isobutanol\_(engineered)\_g\_\_Faecalibacterium\_s\_\_Faecalibacterium

PWY\_3841\_\_folate\_transformations\_II\_g\_\_Bacteroides\_s\_\_Bacteroides\_vulgatus

PWY\_5177\_\_glutaryl\_CoA\_degradation\_g\_\_Faecalibacterium\_s\_\_Faecalibacterium\_prausnitzii

PWY\_6387\_\_UDP\_N\_acetylmuramoyl\_pentapeptide\_biosynthesis\_I\_(meso\_diaminopimelate\_containing)\_g\_\_Faecalibacterium

NONMEVIPP\_PWY\_\_methylethanolphosphate\_pathway\_I\_g\_\_Bacteroides\_s\_\_Bacteroides\_vulgatus

PWY\_7111\_\_pyruvate\_fermentation\_to\_isobutanol\_(engineered)\_g\_\_Ruminococcus\_s\_\_Ruminococcus

VALSYN\_PWY\_\_L\_valine\_biosynthesis\_g\_\_Ruminococcus\_s\_\_Ruminococcus\_bromii

PWY\_7111\_\_pyruvate\_fermentation\_to\_isobutanol\_(engineered)\_g\_\_Streptococcus\_s\_\_Streptococcus

PWY\_7111\_\_pyruvate\_fermentation\_to\_isobutanol\_(engineered)\_g\_\_Bacteroides\_s\_\_Bacteroides

VALSYN\_PWY\_\_L\_valine\_biosynthesis\_g\_\_Bacteroides\_s\_\_Bacteroides\_vulgatus

PWY\_6122\_\_5\_aminimidazole\_ribonucleotide\_biosynthesis\_II\_g\_\_Faecalibacterium\_s\_\_Faecalibacterium

PWY\_6277\_\_superpathway\_of\_5\_aminimidazole\_ribonucleotide\_biosynthesis\_g\_\_Faecalibacterium

PWY\_6121\_\_5\_aminimidazole\_ribonucleotide\_biosynthesis\_I\_g\_\_Faecalibacterium\_s\_\_Faecalibacterium

PWY\_6385\_\_peptidoglycan\_biosynthesis\_III\_(mycobacteria)\_g\_\_Faecalibacterium\_s\_\_Faecalibacterium

PWY0\_1586\_\_peptidoglycan\_maturation\_(meso\_diaminopimelate\_containing)\_g\_\_Faecalibacterium

PEPTIDOGLYCANSYN\_PWY\_\_peptidoglycan\_biosynthesis\_I\_(meso\_diaminopimelate\_containing)\_g\_\_Faecalibacterium

PWY0\_1296\_\_purine\_ribonucleosides\_degradation\_g\_\_Faecalibacterium\_s\_\_Faecalibacterium\_prausnitzii

ASPASN\_PWY\_\_superpathway\_of\_L\_aspartate\_and\_L\_asparagine\_biosynthesis\_g\_\_Faecalibacterium

PWY\_5695\_\_urate\_biosynthesis\_inosine\_5\_phosphate\_degradation\_g\_\_Faecalibacterium\_s\_\_Faecalibacterium

SER\_GLYSYN\_PWY\_\_superpathway\_of\_L\_serine\_and\_glycine\_biosynthesis\_I\_g\_\_Faecalibacterium

PWY\_5097\_\_L\_lysine\_biosynthesis\_VI\_g\_\_Faecalibacterium\_s\_\_Faecalibacterium\_prausnitzii

PWY\_7221\_\_guanosine\_ribonucleotides\_de\_novo\_biosynthesis\_g\_\_Ruminococcus\_s\_\_Ruminococcus

PWY\_7219\_\_adenosine\_ribonucleotides\_de\_novo\_biosynthesis\_g\_\_Bacteroides\_s\_\_Bacteroides\_vulgatus

COA\_PWY\_1\_\_coenzyme\_A\_biosynthesis\_II\_(mammalian)\_g\_\_Faecalibacterium\_s\_\_Faecalibacterium

PWY\_5659\_\_GDP\_mannose\_biosynthesis\_g\_\_Faecalibacterium\_s\_\_Faecalibacterium\_prausnitzii

PWY\_7221\_\_guanosine\_ribonucleotides\_de\_novo\_biosynthesis\_g\_\_Bacteroides\_s\_\_Bacteroides\_vulgatus

PWY\_7221\_\_guanosine\_ribonucleotides\_de\_novo\_biosynthesis\_g\_\_Faecalibacterium\_s\_\_Faecalibacterium

PWY\_6737\_\_starch\_degradation\_V\_g\_\_Dorea\_s\_\_Dorea\_longicatena

PEPTIDOGLYCANSYN\_PWY\_\_peptidoglycan\_biosynthesis\_I\_(meso\_diaminopimelate\_containing)\_g\_\_Faecalibacterium

PWY\_7228\_\_superpathway\_of\_guanosine\_nucleotides\_de\_novo\_biosynthesis\_I\_g\_\_Bacteroides\_s\_\_Bacteroides

PWY\_5667\_\_CDP\_diacylglycerol\_biosynthesis\_I\_g\_\_Faecalibacterium\_s\_\_Faecalibacterium\_prausnitzii

PWY0\_1319\_\_CDP\_diacylglycerol\_biosynthesis\_II\_g\_\_Faecalibacterium\_s\_\_Faecalibacterium\_prausnitzii

UNINTEGRATED\_g\_\_Bacteroides\_s\_\_Bacteroides\_vulgatus

PWY\_6121\_\_5\_aminimidazole\_ribonucleotide\_biosynthesis\_I\_g\_\_Ruminococcus\_s\_\_Ruminococcus

PWY\_6387\_\_UDP\_N\_acetylmuramoyl\_pentapeptide\_biosynthesis\_I\_(meso\_diaminopimelate\_containing)\_g\_\_Faecalibacterium

PWY\_6151\_\_S\_adenosyl\_L\_methionine\_cycle\_I\_g\_\_Faecalibacterium\_s\_\_Faecalibacterium\_prausnitzii

P42\_PWY\_\_incomplete\_reductive\_TCA\_cycle\_unclassified

PANTO\_PWY\_\_phosphopantothenate\_biosynthesis\_I\_g\_\_Bacteroides\_s\_\_Bacteroides\_vulgatus

PWY\_724\_\_superpathway\_of\_L\_lysine\_L\_threonine\_and\_L\_methionine\_biosynthesis\_II\_g\_\_Faecalibacterium

PWY0\_845\_\_superpathway\_of\_pyridoxal\_5\_phosphate\_biosynthesis\_and\_salvage

PWY\_7229\_\_superpathway\_of\_adenosine\_nucleotides\_de\_novo\_biosynthesis\_I\_g\_\_Bacteroides\_s\_\_Bacteroides

PWY\_6122\_\_5\_aminimidazole\_ribonucleotide\_biosynthesis\_II\_g\_\_Ruminococcus\_s\_\_Ruminococcus

PWY\_6277\_\_superpathway\_of\_5\_aminimidazole\_ribonucleotide\_biosynthesis\_g\_\_Ruminococcus

PWY\_4242\_\_pantothenate\_and\_coenzyme\_A\_biosynthesis\_III\_unclassified

PWY\_6507\_\_4\_deoxy\_L\_threo\_hex\_4\_enopyranuronate\_degradation\_g\_Faecalibacterium\_s\_Faecalibacterium\_prausnitzii  
 PWY\_6126\_\_superpathway\_of\_adenosine\_nucleotides\_de\_novo\_biosynthesis\_II\_g\_Bacteroides\_s\_Bacteroides\_vulgatus  
 RHAMCAT\_PWY\_\_L\_rhamnose\_degradation\_I\_unclassified  
 PWY\_6527\_\_stachyose\_degradation\_g\_Faecalibacterium\_s\_Faecalibacterium\_prausnitzii  
 PWY\_6703\_\_preQ0\_biosynthesis\_g\_Bacteroides\_s\_Bacteroides\_vulgatus  
 PWY\_5667\_\_CDP\_diacylglycerol\_biosynthesis\_I\_g\_Ruminococcus\_s\_Ruminococcus\_bromii  
 PWY0\_1319\_\_CDP\_diacylglycerol\_biosynthesis\_II\_g\_Ruminococcus\_s\_Ruminococcus\_bromii  
 PWY\_6125\_\_superpathway\_of\_guanosine\_nucleotides\_de\_novo\_biosynthesis\_II\_g\_Bacteroides\_s\_Bacteroides\_vulgatus  
 PWY\_2942\_\_L\_lysine\_biosynthesis\_III\_g\_Bacteroides\_s\_Bacteroides\_vulgatus  
 PWY\_6700\_\_queuosine\_biosynthesis\_g\_Bacteroides\_s\_Bacteroides\_vulgatus  
 PWY\_5690\_\_TCA\_cycle\_II\_(plants\_and\_fungi)\_unclassified  
 COA\_PWY\_\_coenzyme\_A\_biosynthesis\_I\_g\_Faecalibacterium\_s\_Faecalibacterium\_prausnitzii  
 PWY\_5104\_\_L\_isoleucine\_biosynthesis\_IV\_unclassified  
 PWY\_7357\_\_thiamin\_formation\_from\_pyriothiamine\_and\_oxothiamine\_(yeast)\_g\_Faecalibacterium\_prausnitzii  
 PWY\_5097\_\_L\_lysine\_biosynthesis\_VI\_g\_Bacteroides\_s\_Bacteroides\_vulgatus  
 PWY\_7220\_\_adenosine\_deoxyribonucleotides\_de\_novo\_biosynthesis\_II\_g\_Bacteroides\_s\_Bacteroides\_vulgatus  
 PWY\_7222\_\_guanosine\_deoxyribonucleotides\_de\_novo\_biosynthesis\_II\_g\_Bacteroides\_s\_Bacteroides\_vulgatus  
 RHAMCAT\_PWY\_\_L\_rhamnose\_degradation\_I\_g\_Faecalibacterium\_s\_Faecalibacterium\_prausnitzii  
 PWY\_6385\_\_peptidoglycan\_biosynthesis\_III\_(mycobacteria)\_unclassified  
 COBALSYN\_PWY\_\_adenosylcobalamin\_salvage\_from\_cobinamide\_I\_g\_Faecalibacterium\_s\_Faecalibacterium\_prausnitzii  
 PWY\_5101\_\_L\_isoleucine\_biosynthesis\_II  
 PWY\_7383\_\_anaerobic\_energy\_metabolism\_(invertebrates,\_cytosol)\_unclassified  
 THISYNARA\_PWY\_\_superpathway\_of\_thiamin\_diphosphate\_biosynthesis\_III\_(eukaryotes)\_g\_Faecalibacterium\_prausnitzii  
 PWY\_6151\_\_S\_adenosyl\_L\_methionine\_cycle\_I\_g\_Collinsella\_s\_Collinsella\_aerofaciens  
 PWY\_4242\_\_pantothenate\_and\_coenzyme\_A\_biosynthesis\_III\_g\_Faecalibacterium\_s\_Faecalibacterium\_prausnitzii  
 GALACTUROCAT\_PWY\_\_D\_galacturonate\_degradation\_I\_unclassified  
 PWY\_7456\_\_mannan\_degradation  
 PWY\_7383\_\_anaerobic\_energy\_metabolism\_(invertebrates,\_cytosol)  
 ARGININE\_SYN4\_PWY\_\_L\_ornithine\_de\_novo\_biosynthesis  
 PWY\_7219\_\_adenosine\_ribonucleotides\_de\_novo\_biosynthesis\_g\_Collinsella\_s\_Collinsella\_aerofaciens  
 PWY\_4981\_\_L\_proline\_biosynthesis\_II\_(from\_arginine)\_g\_Collinsella\_s\_Collinsella\_aerofaciens  
 PWY\_6387\_\_UDP\_N\_acetylmuramoyl\_pentapeptide\_biosynthesis\_I\_(meso\_diaminopimelate\_containing)\_g\_Collinsella\_s\_Collinsella\_aerofaciens  
 UNINTEGRATED\_g\_Collinsella\_s\_Collinsella\_aerofaciens  
 PWY\_6386\_\_UDP\_N\_acetylmuramoyl\_pentapeptide\_biosynthesis\_II\_(lysine\_containing)\_g\_Collinsella\_s\_Collinsella\_aerofaciens  
 PWY\_5030\_\_L\_histidine\_degradation\_III  
 PWY\_6737\_\_starch\_degradation\_V\_g\_Collinsella\_s\_Collinsella\_aerofaciens  
 PEPTIDOLYCAN\_SYN\_PWY\_\_peptidoglycan\_biosynthesis\_I\_(meso\_diaminopimelate\_containing)\_g\_Collinsella\_s\_Collinsella\_aerofaciens  
 PWY\_5104\_\_L\_isoleucine\_biosynthesis\_IV  
 PWY\_5304\_\_superpathway\_of\_sulfur\_oxidation\_(Acidianus\_ambivalens)  
 GALACT\_GLUROCAT\_PWY\_\_superpathway\_of\_hexuronide\_and\_hexuronate\_degradation\_unclassified  
 PWY\_6147\_\_6\_hydroxymethyl\_dihydropterin\_diphosphate\_biosynthesis\_I\_g\_Collinsella\_s\_Collinsella\_aerofaciens  
 PWY\_6121\_\_5\_aminimidazole\_ribonucleotide\_biosynthesis\_I\_g\_Collinsella\_s\_Collinsella\_aerofaciens  
 PWY\_6122\_\_5\_aminimidazole\_ribonucleotide\_biosynthesis\_II\_g\_Collinsella\_s\_Collinsella\_aerofaciens  
 PWY\_6277\_\_superpathway\_of\_5\_aminimidazole\_ribonucleotide\_biosynthesis\_g\_Collinsella\_s\_Collinsella\_aerofaciens  
 PWY\_7242\_\_D\_fructuronate\_degradation\_unclassified  
 PWY\_6305\_\_putrescine\_biosynthesis\_IV\_unclassified  
 GLUCUROCAT\_PWY\_\_superpathway\_of\_beta\_D\_glucuronide\_and\_D\_glucuronate\_degradation\_unclassified

PWY\_621\_\_sucrose\_degradation\_III\_(sucrose\_invertase)\_g\_\_Eubacterium\_s\_\_Eubacterium\_rectal  
PWY\_6507\_\_4\_deoxy\_L\_threo\_hex\_4\_enopyranuronate\_degradation\_unclassified  
P108\_PWY\_\_pyruvate\_fermentation\_to\_propanoate\_I

| Vanderbilt-patient_Post-FMT1 | UNC-donor_Donor | UNC-patient_Pre-FMT |
|------------------------------|-----------------|---------------------|
| 0.000042                     | 0.000000157     | 0.000118668         |
| 0.0000335                    | 9.24E-08        | 0.000103054         |
| 0.0000393                    | 0.000000133     | 0.00011325          |
| 0.0000393                    | 0.000000133     | 0.00011325          |
| 0.0000357                    | 0.000000142     | 0.00011139          |
| 0.0000323                    | 8.93E-08        | 0.0000844           |
| 0.0000366                    | 0.000000152     | 0.000107571         |
| 0.0000368                    | 0.000000119     | 0.000101853         |
| 0.000127998                  | 0.000000458     | 0.000173713         |
| 0.0000363                    | 0.000000162     | 0.000108013         |
| 0.0000345                    | 0.000000143     | 0.000100397         |
| 0.0000378                    | 0.000000172     | 0.0000823           |
| 0.0000313                    | 0.000000172     | 0.0000919           |
| 0.0000365                    | 0.000000163     | 0.000103687         |
| 0.000142484                  | 0.000000602     | 0.000191611         |
| 0.0263132                    | 0.000127845     | 0.0641757           |
| 0.0000409                    | 0.000000219     | 0.00012425          |
| 0.000170954                  | 0.00000104      | 0.000242941         |
| 0.000141437                  | 0.00000062      | 0.00019046          |
| 0.000174824                  | 0.000000856     | 0.000242033         |
| 0.0000361                    | 0.00000018      | 0.000103203         |
| 0.000139831                  | 0.000000626     | 0.000189723         |
| 0.000139837                  | 0.000000626     | 0.000189893         |
| 0.0000497                    | 0.000000254     | 0.000147517         |
| 0.0000343                    | 0.000000192     | 0.0000957           |
| 0.0000422                    | 0.000000224     | 0.000122176         |
| 0.000127368                  | 0.000000621     | 0.000191745         |
| 0.000127368                  | 0.000000621     | 0.000191745         |
| 0.0000324                    | 0.00000021      | 0.0000945           |
| 0.0000344                    | 0.000000196     | 0.0000967           |
| 0.0000437                    | 0.000000239     | 0.00012748          |
| 0.0000418                    | 0.000000284     | 0.000129199         |
| 0.0000418                    | 0.000000284     | 0.000129199         |
| 0.0000347                    | 0.000000209     | 0.0000981           |
| 0.0000339                    | 0.000000174     | 0.0000876           |
| 0.000132679                  | 0.000000666     | 0.00018458          |
| 0.0000433                    | 0.000000253     | 0.00010629          |
| 0.0000409                    | 0.000000246     | 0.000122776         |
| 0.0000409                    | 0.000000246     | 0.000122776         |
| 0.0000353                    | 0.0000002       | 0.000100711         |
| 0.0000353                    | 0.0000002       | 0.000100711         |
| 0.000143964                  | 0.000000944     | 0.000197398         |
| 0.00000201                   | 0.000000151     | 0.000000191         |
| 0.00000656                   | 0.000000117     | 0.000000288         |
| 0.000116581                  | 0.000000678     | 0.000173393         |
| 0.000152796                  | 0.000000966     | 0.0002101           |

|             |             |             |
|-------------|-------------|-------------|
| 0.00000418  | 0.000000161 | 0.000000128 |
| 0.000142358 | 0.0000008   | 0.000192559 |
| 0.00000765  | 0.000000202 | 0.000000152 |
| 0.00000259  | 0.000000191 | 0.000000245 |
| 0.000032    | 0.000000243 | 0.0000912   |
| 0.00000196  | 8.01E-08    | 8.08E-08    |
| 0.00000559  | 0.000000211 | 0.000000201 |
| 0.000144202 | 0.00000101  | 0.000195162 |
| 0.00000978  | 0.000000381 | 0.000000338 |
| 0.00000467  | 0.000000223 | 0.000000221 |
| 0.00000773  | 0.0000003   | 0.000000179 |
| 0.000174824 | 0.00000133  | 0.000242033 |
| 0.000174824 | 0.00000133  | 0.000242033 |
| 0.00000966  | 0.00000041  | 0.000000539 |
| 0.0000075   | 0.000000281 | 0.000000427 |
| 0.00000657  | 0.00000025  | 0.000000281 |
| 0.00000692  | 0.000000177 | 0.000000109 |
| 0.00000603  | 0.000000142 | 0.000000178 |
| 0.000144202 | 0.00000116  | 0.000195162 |
| 0.00000446  | 0.000000174 | 0.000000101 |
| 0.00000566  | 0.000000146 | 0.000000212 |
| 0.00000495  | 0.000000128 | 0.0000157   |
| 0.00000495  | 0.000000128 | 0.0000157   |
| 0.00000524  | 0.000000148 | 6.02E-08    |
| 9.72E-08    | 0.000000183 | 0.000000227 |
| 9.72E-08    | 0.000000183 | 0.000000227 |
| 0.00000651  | 0.000000271 | 0.000000171 |
| 0.00000681  | 0.000000167 | 0.000000144 |
| 0.00000645  | 0.000000199 | 0.000000146 |
| 0.0000159   | 0.000000329 | 0.0000272   |
| 0.00000485  | 0.000000164 | 0.000000169 |
| 0.00000518  | 0.000000122 | 0.00000016  |
| 0.00000644  | 0.000000285 | 0.000000213 |
| 0.00000665  | 0.000000208 | 0.000000177 |
| 0.00000437  | 0.000000133 | 0.000000131 |
| 0.00000762  | 0.000000305 | 0.000000328 |
| 0.163006    | 0.00132921  | 0.230738    |
| 0.00000461  | 0.00000026  | 0.000000247 |
| 0.00000367  | 0.000000173 | 0.000000238 |
| 0.00000607  | 0.000000162 | 0.000000131 |
| 0.00000365  | 0.000000167 | 0.000000218 |
| 0.0000036   | 0.000000112 | 7.96E-08    |
| 0.00000565  | 0.000000178 | 0.000000118 |
| 0.00000529  | 0.000000211 | 0.000000199 |
| 0.00000613  | 0.000000249 | 0.000000334 |
| 0.00000472  | 0.000000128 | 0.000000158 |
| 0.00000472  | 0.000000128 | 0.000000158 |



|             |             |             |
|-------------|-------------|-------------|
| 0.00000596  | 0.000000169 | 0.000000198 |
| 0.00000472  | 0.000000178 | 0.000000219 |
| 0.00000118  | 0.000000316 | 0.000000235 |
| 0.00000756  | 0.000000344 | 0.000000334 |
| 0.00000447  | 0.000000193 | 0.000000219 |
| 0.00000407  | 0.000000198 | 0.000000257 |
| 0.00000612  | 0.000000183 | 0.000000132 |
| 0.00000612  | 0.000000183 | 0.000000132 |
| 0.00000612  | 0.000000183 | 0.000000132 |
| 0.000006    | 0.000000244 | 0.000000212 |
| 0.00000616  | 0.000000264 | 0.000000203 |
| 0.0000047   | 0.000000206 | 0.000000185 |
| 0.00000876  | 0.000000327 | 0.000000025 |
| 0.00000574  | 0.000000273 | 0.000000244 |
| 0.00000565  | 0.000000225 | 0.000000343 |
| 0.00000432  | 0.000000207 | 0.000000262 |
| 0.00000877  | 0.000000322 | 0.000000412 |
| 0.000000107 | 2.67E-08    | 0           |
| 0.000000137 | 3.34E-08    | 0           |
| 0.00000519  | 0.000000171 | 0.000000181 |
| 0.00000016  | 3.86E-08    | 0           |
| 0.00000838  | 0.000000322 | 0.000000186 |
| 0.00000544  | 0.000000252 | 0.000000025 |
| 0.00000221  | 0.000000213 | 0.000000164 |
| 0.00000545  | 0.000000213 | 0.000000184 |
| 0.00000545  | 0.000000213 | 0.000000184 |
| 0.00000604  | 0.000000162 | 8.96E-08    |
| 0.00000604  | 0.000000162 | 8.96E-08    |
| 0.00000604  | 0.000000162 | 8.96E-08    |
| 0.00000604  | 0.000000162 | 8.96E-08    |
| 0.00000613  | 0.000000229 | 0.000000264 |
| 0.0000061   | 0.000000235 | 0.000000256 |
| 0.00000917  | 0.000000349 | 0.000000359 |
| 0.00000865  | 0.000000394 | 0.000000384 |
| 0.00000562  | 0.000000146 | 9.78E-08    |
| 0.00000562  | 0.000000146 | 9.78E-08    |
| 0.000006    | 0.000000221 | 0.000000261 |
| 0.0000343   | 5.06E-08    | 0.0000114   |
| 0.0000106   | 0.000000354 | 0.000000917 |
| 0.00000475  | 0.000000194 | 4.09E-08    |
| 0.00000614  | 0.000000245 | 0.000000248 |
| 0.00000587  | 0.000000254 | 0.000000183 |
| 0.00000705  | 0.000000321 | 0.000000261 |
| 0.00000704  | 0.000000218 | 0.000000286 |
| 0.00000528  | 0.000000363 | 0.000000358 |
| 0.00000434  | 0.000000188 | 0.000000157 |
| 0.00000424  | 0.000000378 | 0.0000135   |

|            |             |             |
|------------|-------------|-------------|
| 0.0000424  | 0.000000378 | 0.0000135   |
| 0.0000546  | 0.00000017  | 0.000000151 |
| 0.0000838  | 0.00000049  | 0.000000459 |
| 0.0000392  | 0.000000253 | 0.000000335 |
| 0.0000599  | 0.000000263 | 0.000000215 |
| 0.0000469  | 0.000000228 | 0.000000202 |
| 0.0000193  | 0.000000991 | 0.000000868 |
| 0.0000794  | 0.000000317 | 0.000000357 |
| 0.0000125  | 0.000000439 | 0.000000397 |
| 0.0000597  | 0.00000018  | 0.000000156 |
| 0.0000585  | 0.000000254 | 0.000000186 |
| 0.0000107  | 0.000000459 | 0.000000398 |
| 0.000007   | 0.000000223 | 0.000000112 |
| 0.00000915 | 0.000000341 | 0.000000171 |
| 0.0000577  | 0.000000271 | 0.000000236 |
| 0.0000446  | 0.000000257 | 0.000000019 |
| 0.000007   | 0.000000218 | 0.000000245 |
| 0.0000804  | 0.000000288 | 0.000000013 |
| 0.0000804  | 0.000000288 | 0.000000013 |
| 0.0000804  | 0.000000288 | 0.000000013 |
| 0.0000804  | 0.000000288 | 0.000000013 |
| 0.0000553  | 0.000000249 | 0.000000191 |
| 0.0000555  | 0.000000287 | 0.000000214 |
| 0.0000852  | 0.000000316 | 0.000000267 |
| 0.0000735  | 0.000000347 | 0.000000479 |
| 0.0000113  | 0.000000487 | 0.0000135   |
| 0.0000693  | 0.000000252 | 0.000000097 |
| 0.0000378  | 0.000000213 | 0.000000197 |
| 0.0000596  | 0.000000285 | 0.000000269 |
| 0.0000623  | 0.00000015  | 0.000000105 |
| 0.0000543  | 0.000000168 | 0.000000103 |
| 0.0000507  | 0.000000238 | 0.0000181   |
| 0.0000454  | 0.000000251 | 8.82E-08    |
| 0.0000727  | 0.000000394 | 0.000000391 |
| 0.0000429  | 0.00000021  | 0.00000026  |
| 0.0000849  | 0.000000222 | 0.000000135 |
| 0.0000124  | 0.000000361 | 0.000000493 |
| 0.0000125  | 0.000000358 | 0.000000069 |
| 0.0000983  | 0.000000408 | 0.000000665 |
| 0.0000816  | 0.000000418 | 0.0000135   |
| 0.0000924  | 0.000000369 | 0.000000274 |
| 0.0000045  | 0.000000286 | 0.000000279 |
| 0.0000727  | 0.000000453 | 0.000000247 |
| 0.0000108  | 0.000000443 | 0.000000843 |
| 0.0000282  | 4.31E-08    | 1.56E-08    |
| 0.0000536  | 0.00000029  | 0.000000769 |
| 0.0000499  | 0.000000261 | 0.000000151 |

|            |             |             |
|------------|-------------|-------------|
| 0.0000038  | 0.000000272 | 0.000000144 |
| 0.00000531 | 0.000000306 | 0.000000915 |
| 0.00000559 | 0.000000316 | 0.000000286 |
| 0.00000321 | 0.000000187 | 0.000000224 |
| 0.0000071  | 0.000000318 | 0.000000233 |
| 0.00000277 | 4.54E-08    | 2.49E-08    |
| 0.0000056  | 0.000000268 | 0.000000277 |
| 0.00000816 | 0.000000412 | 0.000000321 |
| 0.00000317 | 5.37E-08    | 2.92E-08    |
| 0.00000368 | 0.000000189 | 0.000000134 |
| 0.00000974 | 0.000000435 | 0.000000377 |
| 0.00000974 | 0.000000435 | 0.000000364 |
| 0.00000621 | 0.000000328 | 0.000000303 |
| 0.00000644 | 0.000000311 | 0.000000545 |
| 0.00000485 | 0.000000238 | 0.000000268 |
| 0.00000137 | 0.000000121 | 0.000000111 |
| 0.00000765 | 0.000000451 | 0.000000576 |
| 0.00000504 | 0.000000207 | 0.000000419 |
| 0.00000446 | 0.000000292 | 0.000000203 |
| 0.00000482 | 0.000000207 | 0.000000185 |
| 0.00000857 | 0.000000436 | 0.000000414 |
| 0.00000912 | 0.000000426 | 0.000000027 |
| 0.00000543 | 0.000000203 | 0.000000206 |
| 0.0000186  | 0.000000907 | 0.000000708 |
| 0.0000043  | 0.000000258 | 0           |
| 0.00000598 | 0.000000311 | 0.000000215 |
| 0.00000441 | 0.000000108 | 0.000000247 |
| 0.00000446 | 0.000000227 | 0.000000125 |
| 0.000003   | 0.000000148 | 0.000000221 |
| 0.000003   | 0.000000148 | 0.000000221 |
| 0.00000868 | 0.000000371 | 0.000000148 |
| 0.00000868 | 0.000000371 | 0.000000148 |
| 0.00000455 | 9.38E-08    | 5.45E-08    |
| 0.00000626 | 0.000000112 | 6.43E-08    |
| 0.00000626 | 0.000000112 | 6.43E-08    |
| 0.0000118  | 0.000000476 | 0.000000418 |
| 0.0000491  | 0.000000125 | 0           |
| 0.00000889 | 0.000000435 | 0.000000323 |
| 0.00000577 | 0.000000237 | 0.000000154 |
| 0.0000052  | 0.000000196 | 0.000000112 |
| 0.0140066  | 0.000370775 | 0.187459    |
| 0.00000698 | 0.000000467 | 0.000000185 |
| 0.0000106  | 0.000000271 | 0.0000196   |
| 0.0000115  | 0.000000064 | 0.000000029 |
| 0.000004   | 0.000000131 | 6.42E-08    |
| 0.0278502  | 0.00134754  | 0.00741683  |
| 0.0000194  | 0.000000189 | 0           |

|             |             |             |
|-------------|-------------|-------------|
| 0.00000881  | 0.00000035  | 0.000000179 |
| 0.00000881  | 0.00000035  | 0.000000179 |
| 0.00000769  | 0.000000375 | 0.000000275 |
| 0.00000515  | 0.000000287 | 5.59E-08    |
| 0.0000073   | 0.000000331 | 0.00000018  |
| 0.0000716   | 0.00000015  | 9.83E-08    |
| 0.00000728  | 0.000000353 | 0.000000379 |
| 0.00000314  | 0.000000254 | 0.000000197 |
| 0.0000064   | 0.000000297 | 0.000000333 |
| 0.0000576   | 0.000000147 | 0.000000191 |
| 0.0000638   | 0.000000142 | 5.23E-08    |
| 0.0000443   | 0.000000119 | 0.000000066 |
| 0.00004     | 0.000000537 | 0.0000266   |
| 0.00000614  | 0.000000345 | 0.000000326 |
| 0.0000188   | 0.000000998 | 0.0000219   |
| 0.00000648  | 0.000000347 | 0.000000307 |
| 0.0000764   | 0.000000174 | 0.000000123 |
| 0.00000177  | 0.000000135 | 7.99E-08    |
| 0.0000503   | 0.000000107 | 5.88E-08    |
| 0.0000193   | 0.000000193 | 0           |
| 0.0000507   | 0.00000014  | 0           |
| 0.00000521  | 0.000000183 | 0.000000104 |
| 0.000133112 | 0.000000244 | 0.000000208 |
| 0.00000536  | 0.000000216 | 3.46E-08    |
| 0.00000546  | 0.000000219 | 0.000000823 |
| 0.0548372   | 0.000142193 | 0.0009482   |
| 0.0000784   | 0.00000013  | 5.22E-08    |
| 0.000017    | 9.95E-08    | 0           |
| 0.0000022   | 0.000000169 | 0.000000142 |
| 0.0000185   | 6.35E-08    | 0           |
| 0.0000201   | 7.96E-08    | 0           |
| 0.000127978 | 0.000000263 | 0.000000188 |
| 0.000127978 | 0.000000263 | 0.000000188 |
| 0.00000396  | 0.000000546 | 0.000149077 |
| 0.0000446   | 0.000000922 | 0.0000317   |
| 0.0000222   | 4.85E-08    | 0           |
| 0.000107419 | 0.000000222 | 0.000000144 |
| 0.0000173   | 5.24E-08    | 0           |
| 0.000284305 | 0.00000435  | 0.000372259 |
| 0.0000613   | 0.000000196 | 5.84E-08    |
| 0.00000472  | 6.31E-08    | 0.000000292 |
| 0.0000333   | 0.000000175 | 5.92E-08    |
| 0.000129312 | 0.000000194 | 0.000000215 |
| 0.000129312 | 0.000000194 | 0.000000215 |
| 0.0000114   | 0.000000858 | 0.0000301   |
| 0.00000537  | 0.000000186 | 0.000000106 |
| 0.00000537  | 0.000000186 | 0.000000106 |

|             |             |             |
|-------------|-------------|-------------|
| 0.000106889 | 0.000000221 | 0.000000179 |
| 0.000000197 | 3.16E-08    | 0           |
| 0.0000901   | 0.000000207 | 0.000000179 |
| 0.0000169   | 0.000000088 | 0.000000081 |
| 0.0000925   | 0.00000021  | 0.000000203 |
| 0.00000361  | 0.000000211 | 0.000000104 |
| 0.0000771   | 0.000000212 | 0.000000154 |
| 0.0000841   | 0.000000225 | 0.000000143 |
| 0.0000223   | 5.23E-08    | 0           |
| 0.0000691   | 0.0000002   | 0.000000171 |
| 0.0000191   | 0.00000129  | 0.0000488   |
| 0.000118037 | 0.000000214 | 0.000000211 |
| 0.0000207   | 5.77E-08    | 0           |
| 0.000127392 | 0.000000222 | 0.000000219 |
| 0.00000626  | 0.000000186 | 9.59E-08    |
| 0.0000177   | 8.93E-08    | 0           |
| 0.000124301 | 0.000000252 | 0.000000218 |
| 0.0000399   | 0.000000295 | 0.00018801  |
| 0.000019    | 7.67E-08    | 0           |
| 0.00000659  | 0.000000423 | 0.00000123  |
| 0.00000659  | 0.000000423 | 0.00000123  |
| 0.00164758  | 0.000143905 | 0.100464    |
| 0.000116859 | 0.000000313 | 0.000000197 |
| 0.00000439  | 0.000000263 | 0.000000173 |
| 0.0000166   | 9.06E-08    | 0           |
| 0.0000413   | 0.000000235 | 0.00000102  |
| 0.0000219   | 0.00000144  | 0.0000129   |
| 0.0000497   | 0.000000401 | 0.00000014  |
| 0.00101787  | 0.0000597   | 0.0374877   |
| 0.0000319   | 0.00000148  | 0.00000747  |
| 0.00000379  | 0.000000736 | 0.0000332   |
| 0.0000227   | 0.000000126 | 0           |
| 0.000022    | 0.00000114  | 0.0000256   |
| 0.0000247   | 0.00000137  | 0.0000335   |
| 0.0000352   | 0.00000329  | 0.000105639 |
| 0.0000352   | 0.00000329  | 0.000105639 |
| 0.0000185   | 0.00000212  | 0.0000343   |
| 0.0000037   | 0.000000346 | 0.000000832 |
| 0.0000317   | 0.00000139  | 0.00000541  |
| 0.0139074   | 0.0000728   | 0           |
| 0.00000811  | 0.000000263 | 0.00000155  |
| 0.00000843  | 0.000000746 | 0.0000159   |
| 0.00000773  | 0.000000137 | 0.000013    |
| 0.0000191   | 0.000000112 | 0           |
| 0.00000864  | 0.00000073  | 0.0000159   |
| 0.0000122   | 0.00000176  | 0.0000353   |
| 0.00000431  | 0.000000459 | 0.000000162 |

|             |             |             |
|-------------|-------------|-------------|
| 0.0000516   | 0.00000489  | 0.000141551 |
| 0.0000516   | 0.00000489  | 0.000141551 |
| 0.0000516   | 0.00000489  | 0.000141551 |
| 0.00000785  | 0.000000266 | 0.00000115  |
| 0.00000785  | 0.000000266 | 0.00000115  |
| 0.00023537  | 0.00000552  | 0.000219723 |
| 0.0000219   | 0.000000117 | 0           |
| 0.0000199   | 0.000000102 | 0           |
| 0.000000959 | 0.000000219 | 0.00017655  |
| 0.0000031   | 0.000000323 | 0.000000631 |
| 0.0000197   | 0.000000127 | 0           |
| 0.0000197   | 0.000000127 | 0           |
| 0.000153699 | 0.00000294  | 0.000179002 |
| 0.00000129  | 0.000000214 | 0.000216702 |
| 0.00000104  | 0.000000169 | 0.000168162 |
| 0.0000352   | 0.00000329  | 0.000105639 |
| 0.0000122   | 0.000000231 | 0.0000174   |
| 0.0000503   | 0.00000325  | 0.000176942 |
| 0.000000941 | 0.00000016  | 0.000147644 |
| 0.0000354   | 0.00000285  | 0.0000128   |
| 0.0000116   | 0.00000102  | 0.000018    |
| 0.0000116   | 0.00000102  | 0.000018    |
| 0.0000116   | 0.00000102  | 0.000018    |
| 0.0000116   | 0.00000102  | 0.000018    |
| 0.0000237   | 0.000000184 | 0           |
| 0.0000214   | 0.000000141 | 0           |
| 0.00000114  | 0.000000219 | 0.00018125  |
| 0.0000199   | 0.000000167 | 0           |
| 0.00000103  | 0.00000003  | 0.000176507 |
| 0.000000586 | 0.000000216 | 7.72E-08    |
| 0.00000101  | 0.000000206 | 0.000176275 |
| 0.0000106   | 0.000000759 | 0.0000526   |
| 0.0000211   | 0.00000163  | 0.0000381   |
| 0.0000267   | 0.00000244  | 0.00000538  |
| 0.0000516   | 0.00000489  | 0.000141551 |
| 0.000000927 | 0.000000216 | 0.000170083 |
| 0.00000139  | 0.000000374 | 0.000247666 |
| 0.00000116  | 0.000000413 | 0.000220897 |
| 0.00000113  | 0.000000449 | 0.000237565 |
| 0.000000503 | 0.000000315 | 0.000155549 |
| 0.000000826 | 0.000000217 | 0.000157125 |
| 0.0000603   | 0.00000492  | 0.0000735   |
| 0.0000014   | 0.00000039  | 0.000243525 |
| 0.000000465 | 0.000000171 | 0.000136167 |
| 0.0310167   | 0.000271427 | 0           |
| 0.00000152  | 0.000000501 | 0.000263849 |
| 0.000000789 | 0.000000259 | 0.000139932 |

|             |             |             |
|-------------|-------------|-------------|
| 0.00000807  | 0.00000024  | 0.000159471 |
| 0.00000287  | 0.000000578 | 0           |
| 0.0000233   | 0.00000238  | 0.0000261   |
| 0.000000851 | 0.000000256 | 0.000168997 |
| 0.00000122  | 0.000000481 | 0.000200117 |
| 0.000000778 | 0.000000229 | 0.000153235 |
| 0.00000153  | 0.000000593 | 0.000242045 |
| 0.000000739 | 0.000000248 | 0.000149348 |
| 0.0000729   | 0.0000067   | 0.000174911 |
| 0.0000729   | 0.0000067   | 0.000174911 |
| 0.000000925 | 0.000000421 | 0.000191391 |
| 0.00000124  | 0.000000459 | 0.000242108 |
| 0.000000856 | 0.000000282 | 0.000176272 |
| 0.000000743 | 0.000000358 | 0.000178942 |
| 0.000000371 | 0           | 0           |
| 0.000000778 | 0.000000378 | 0.000188292 |
| 0.00000127  | 0.000000441 | 0.000248398 |
| 0.00000018  | 0.000000039 | 0.0000609   |
| 0.000000772 | 0.000000035 | 0.000175188 |
| 0.000001    | 0.000000411 | 0.000225496 |
| 0.000000972 | 0.0000004   | 0.000217908 |
| 0.00000103  | 0.000000404 | 0.00022163  |
| 0.00000113  | 0.00000063  | 0.00024343  |
| 0.000000832 | 0.000000334 | 0.00016322  |
| 0.00000134  | 0.00000055  | 0.000241877 |
| 0.000000827 | 0.00000033  | 0.000163841 |
| 0.00000103  | 0.000000428 | 0.00022163  |
| 0.00000153  | 0.000000596 | 0.000255083 |
| 0.000000498 | 0.000000279 | 0.000146099 |
| 0.00000827  | 0.000000122 | 4.36E-08    |
| 0.00000112  | 0.000000456 | 0.000198005 |
| 0.00000153  | 0.000000573 | 0.000260547 |
| 0.00000153  | 0.000000573 | 0.000260547 |
| 0.00000115  | 0.000000528 | 0.000253872 |
| 0.0000433   | 0.00000502  | 0.000115434 |
| 0.000000355 | 0.00000012  | 0.000114693 |
| 0.000000355 | 0.00000012  | 0.000114693 |
| 0.000000502 | 0.000000307 | 0.000164497 |
| 0.000000502 | 0.000000307 | 0.000164497 |
| 0.000038    | 0.000000217 | 0           |
| 0.00000117  | 0.00000058  | 0.000257021 |
| 0.00000117  | 0.00000058  | 0.000257021 |
| 0.00000141  | 0.000000582 | 0.000243669 |
| 0.00000873  | 0.00000089  | 0.000103363 |
| 0.0000011   | 0.000000503 | 0.00020159  |
| 0.000000647 | 0.000000317 | 0.000238012 |
| 0.000000666 | 0           | 0           |

|             |             |             |
|-------------|-------------|-------------|
| 0.00000322  | 0           | 0           |
| 0.00000385  | 0           | 0           |
| 0.00000823  | 0.000000494 | 0.0000399   |
| 0           | 0.000000297 | 0.000000164 |
| 0.00000376  | 0           | 0           |
| 0           | 5.54E-08    | 0.0000017   |
| 0.000221379 | 0.00000733  | 0.0000194   |
| 0.00000644  | 0           | 0           |
| 0.00000166  | 0.00000025  | 0           |
| 0.0000294   | 0.0000167   | 0.000235039 |
| 0.000419653 | 0           | 0.00000077  |
| 0.00000764  | 0.00000232  | 0.00000482  |
| 0.000519781 | 0           | 0.00000117  |
| 0.000000446 | 5.22E-08    | 0           |
| 0.000576684 | 0           | 0           |
| 0.000454264 | 0           | 0.000000984 |
| 0.00000631  | 8.24E-08    | 0.000000087 |
| 0.000000515 | 0.000000059 | 0           |
| 0.0000646   | 0.00000858  | 0.000100325 |
| 0.00000369  | 0           | 0           |
| 0.000422308 | 0           | 0.000000772 |
| 0.00042015  | 0           | 0.000000776 |
| 0.000000551 | 0           | 0           |
| 0.0000244   | 0           | 0           |
| 0.000481725 | 0           | 0.000000796 |
| 0.000503234 | 0           | 0.0000017   |
| 0.00000495  | 8.58E-08    | 7.75E-08    |
| 0.000630229 | 0           | 0.00000292  |
| 0.000000336 | 0           | 0           |
| 0.000000336 | 0           | 0           |
| 0.000402746 | 0           | 0.00000091  |
| 0.00000645  | 0.0000131   | 0.000149314 |
| 0.000000592 | 0           | 0           |
| 0.000000431 | 0           | 0           |
| 0.00000235  | 0.000000082 | 0           |
| 0.000000456 | 0           | 0           |
| 0.0000375   | 0.00000525  | 0.0000379   |
| 0.000240118 | 0.0000101   | 0.0000272   |
| 0.000017    | 0.0000273   | 0.000000673 |
| 0.000192996 | 0.00000856  | 0.0000669   |
| 0.00000228  | 0.000000106 | 7.89E-08    |
| 0.312088    | 0           | 0.00142448  |
| 0.000000309 | 5.31E-08    | 0           |
| 0           | 4.06E-08    | 0.0000114   |
| 0.00000799  | 0.000000188 | 9.14E-08    |
| 0.0000434   | 0.00000742  | 0.00017018  |
| 0.00000172  | 0           | 0           |



|             |             |             |
|-------------|-------------|-------------|
| 0.000000107 | 2.45E-08    | 0           |
| 0.0000121   | 0.0000112   | 0.0000355   |
| 0.0000267   | 0.00000785  | 0.000035    |
| 0.0000444   | 0.00000769  | 0.0000667   |
| 0.0000068   | 0.000000182 | 9.04E-08    |
| 0.000000852 | 0.000000074 | 0           |
| 0.000166854 | 0.0000189   | 0.000247765 |
| 0.000166854 | 0.0000189   | 0.000247765 |
| 0.000166854 | 0.0000189   | 0.000247765 |
| 0.00185629  | 0.000039    | 0           |
| 0.0000424   | 0.00000035  | 0           |
| 0.0000134   | 0.00000618  | 0.0000271   |
| 0.0000122   | 0.0000042   | 0.000000422 |
| 0           | 0.000000238 | 8.94E-08    |
| 0.00000627  | 0           | 0.000000158 |
| 0.000000702 | 0           | 0.0000324   |
| 0.0000197   | 0.0000091   | 0.0000402   |
| 0.0000971   | 0.0000174   | 0.000166523 |
| 0           | 0.000000218 | 7.69E-08    |
| 0.0000143   | 0.00000662  | 0.0000283   |
| 0.0000513   | 0.000000441 | 0           |
| 0.0000224   | 0.0000103   | 0.0000453   |
| 0.000000881 | 0.000000256 | 0           |
| 0.0000017   | 4.18E-08    | 0           |
| 0.00000158  | 4.23E-08    | 0           |
| 0.0000072   | 0.000000122 | 4.36E-08    |
| 0.00000165  | 3.26E-08    | 0           |
| 0.000000687 | 0           | 0.0000255   |
| 0.00000427  | 0.000000158 | 0.000000117 |
| 0.000000698 | 0           | 0.0000297   |
| 0.0000272   | 9.64E-08    | 0           |
| 0.00437229  | 0.000264561 | 0           |
| 0.0000104   | 0.000000363 | 0.00000142  |
| 0.000000653 | 0           | 0.0000288   |
| 0.000000653 | 0           | 0.0000288   |
| 0.0000248   | 6.97E-08    | 0           |
| 0.00000073  | 0           | 0.0000305   |
| 0.00000152  | 7.34E-08    | 0           |
| 0.0000405   | 0.0000119   | 0.00000144  |
| 0.000000947 | 0           | 0.0000287   |
| 0.000000842 | 0           | 0.0000327   |
| 0.000000752 | 0           | 0.0000289   |
| 0.0000261   | 0.000000102 | 0           |
| 0.000041    | 0.00000035  | 0           |
| 0.000000921 | 0.00000025  | 0           |
| 0.000000921 | 0.00000025  | 0           |
| 0.000000669 | 0           | 0.0000289   |

|             |             |             |
|-------------|-------------|-------------|
| 0.000024    | 0.0000113   | 0.0000349   |
| 0.000000539 | 0           | 0.0000271   |
| 0.00000182  | 0.000000492 | 0           |
| 0.0000419   | 0.000000363 | 0           |
| 0.00000166  | 0.00000026  | 0           |
| 0.0000429   | 0.000000371 | 0           |
| 0.00000094  | 0           | 0.0000308   |
| 0.0000688   | 0.0000115   | 0.0000824   |
| 0.00000191  | 0.000000536 | 0           |
| 0.000000547 | 0           | 0.0000267   |
| 0.0000055   | 0           | 0           |
| 0.000000709 | 0           | 0.0000273   |
| 0.000000519 | 0.000000175 | 0           |
| 0.000000873 | 0.000000256 | 0           |
| 0.000000803 | 0           | 0.0000307   |
| 0.000012    | 0.00000181  | 0.00000226  |
| 0.000145629 | 0.000042    | 0.000209398 |
| 0.000145629 | 0.000042    | 0.000209393 |
| 0.000015    | 0.00000915  | 0.0000288   |
| 0.000000456 | 0           | 0.0000287   |
| 0.000000456 | 0           | 0.0000287   |
| 0.00000144  | 0.000000454 | 0           |
| 0.000000886 | 0           | 0.0000306   |
| 0.000446542 | 0           | 0.018293    |
| 0.000000667 | 0           | 0.0000272   |
| 0.0000217   | 0.0000238   | 0.0000564   |
| 0.0000111   | 0.000000512 | 0.00000177  |
| 0.000000729 | 0           | 0.0000323   |
| 0.00000111  | 0.000000279 | 0           |
| 0.00000105  | 0.000000241 | 0           |
| 0.00000101  | 0.000000189 | 0           |
| 0.0000259   | 0.0000122   | 0.000045    |
| 0.00000142  | 0           | 0           |
| 0.000000996 | 0.000000276 | 0           |
| 0.00000212  | 0.000000546 | 0           |
| 0.000000895 | 0.000000243 | 0           |
| 0.000000716 | 0           | 0.0000323   |
| 0.000000855 | 0.000000255 | 0           |
| 0.00000592  | 0.00000032  | 0.000000038 |
| 0.000000666 | 0           | 0.000027    |
| 0.000109906 | 0.0000199   | 0.000141551 |
| 0.000000826 | 0.00000026  | 0           |
| 0.0000313   | 5.47E-08    | 0           |
| 0.00000101  | 0.000000254 | 0           |
| 0.000000646 | 0           | 0.0000275   |
| 0.0000305   | 0.000000059 | 0           |
| 0.00000119  | 0.000000317 | 0           |

|             |             |             |
|-------------|-------------|-------------|
| 0.00000713  | 0           | 0.0000257   |
| 0.00000189  | 0.000000452 | 0           |
| 0.00000189  | 0.000000452 | 0           |
| 0.000018    | 0.0000114   | 0.0000348   |
| 0.0000272   | 5.66E-08    | 0           |
| 0.00000294  | 0.00000185  | 0.0000387   |
| 0.000000923 | 0           | 0.000034    |
| 0.0000164   | 0.00000409  | 0.0000148   |
| 0.00000109  | 0           | 0.0000408   |
| 0.0000238   | 0.000000105 | 0           |
| 0.0000137   | 0.000000982 | 0.0000109   |
| 0.00000627  | 0.000000215 | 0.000000852 |
| 0.00000119  | 0.00000039  | 0           |
| 0.0000499   | 0.000036    | 0.0000414   |
| 0.000000574 | 0           | 0.0000264   |
| 0.000048    | 0.0000509   | 0.0000574   |
| 0.0000287   | 0.00000821  | 0.000016    |
| 0.00000438  | 0.000000309 | 0.000000196 |
| 0.00000114  | 0.000000404 | 0           |
| 0.00000651  | 0.000000504 | 0.000000817 |
| 0.000000346 | 0.000000297 | 0           |
| 0.00000101  | 0.000000278 | 0           |
| 0.0000118   | 0.00000495  | 0.0000305   |
| 0.000122493 | 0.0000239   | 0.000191754 |
| 0.0000461   | 0.0000501   | 0.0000553   |
| 0.000347609 | 0.0000783   | 0.000295301 |
| 0.00000676  | 0.000000204 | 0.0000217   |
| 0.00012507  | 0.0000662   | 0.000299957 |
| 0.00105717  | 0.000176736 | 0.000933803 |
| 0.0000196   | 0.00000947  | 0.0000274   |
| 0.00000587  | 0.000000207 | 0.000000155 |
| 0.0000296   | 0.000000122 | 0           |
| 0.0000296   | 0.000000122 | 0           |
| 0.00000558  | 0.000000057 | 0           |
| 0.0000128   | 0.0000133   | 0.0000243   |
| 0.000000156 | 0.000000184 | 0           |
| 0.0000313   | 0.000000132 | 0           |
| 0.0000274   | 0.000000103 | 0           |
| 0.0000269   | 9.56E-08    | 0           |
| 0.0000235   | 7.68E-08    | 0           |
| 0.000006    | 0.000000202 | 0.000000198 |
| 0.0000409   | 0.0000145   | 0.000117695 |
| 0.00000183  | 0.000000908 | 0.00000492  |
| 0.00000575  | 0.000000194 | 0.000000164 |
| 0.000413071 | 0.000128445 | 0.000425395 |
| 0.0000272   | 0.000000109 | 0           |
| 0.00000734  | 0           | 0           |

|             |             |             |
|-------------|-------------|-------------|
| 0.0000168   | 5.64E-08    | 0           |
| 0.00000584  | 0.0000087   | 0           |
| 0.0000648   | 0.0000371   | 0.00000554  |
| 0.0277844   | 0.000118528 | 0           |
| 0.0000482   | 0.0000442   | 0.0000221   |
| 0.00000604  | 0.000000123 | 0.000000118 |
| 0           | 0.000000221 | 0.000000173 |
| 0.0000248   | 0.000000137 | 0           |
| 0.00000608  | 0.000000193 | 0.000000172 |
| 0.0000246   | 0.000000122 | 0           |
| 0.0000246   | 0.000000122 | 0           |
| 0.00000811  | 0.000000249 | 0.000000364 |
| 0.00000811  | 0.000000249 | 0.000000364 |
| 0.000145815 | 0.0000439   | 0.000170321 |
| 0.0000271   | 9.29E-08    | 0           |
| 0.00000661  | 0.000000311 | 0.000000015 |
| 0.0000276   | 0.000000137 | 0           |
| 0.00000629  | 0.000000194 | 0.000000014 |
| 0           | 0.000000018 | 0.000000467 |
| 0.00000809  | 0.00000168  | 0.0000151   |
| 0.0000291   | 0.0000125   | 0.00000969  |
| 0.00000572  | 0.000000025 | 6.64E-08    |
| 0.0000028   | 0.00000153  | 0           |
| 0.0000226   | 0.0000294   | 0.0000363   |
| 0.0000505   | 0.0000422   | 0.000116572 |
| 0.0000203   | 0.000000105 | 0           |
| 0.0000674   | 0.0000238   | 0.000212123 |
| 0.000000451 | 0.000000227 | 0.00000149  |
| 0.0000022   | 0.00000127  | 0.00000673  |
| 0           | 3.03E-08    | 0.000000148 |
| 0           | 2.45E-08    | 9.35E-08    |
| 0           | 2.45E-08    | 9.35E-08    |
| 0.0000066   | 0.000000288 | 0.000000159 |
| 0.0000201   | 0.0000255   | 0.0000361   |
| 0.000315709 | 0.000098    | 0.00039681  |
| 0.0000259   | 0.000000015 | 0           |
| 0.000243777 | 0.0000962   | 0.000343805 |
| 0.00000394  | 0           | 0           |
| 0.000376289 | 0.000122218 | 0.00046627  |
| 0.000106333 | 0.000118885 | 0.00011531  |
| 0.00000616  | 0.000000249 | 0.000000193 |
| 0.000417765 | 0.000140259 | 0.000539597 |
| 0.000000101 | 0.000000191 | 0.00000236  |
| 0.000475033 | 0.000158231 | 0.000604395 |
| 0.000137138 | 0.000059    | 0.0000762   |
| 0.000424462 | 0.000138303 | 0.000548168 |
| 0.000297867 | 0.0000901   | 0.000435074 |

|             |             |             |
|-------------|-------------|-------------|
| 0.000297867 | 0.0000901   | 0.000435074 |
| 0.00000199  | 0.00000205  | 0.000000595 |
| 0.00000199  | 0.00000205  | 0.000000595 |
| 0.0000622   | 0.0000425   | 0.0000761   |
| 0           | 0.00000021  | 0.000000142 |
| 0.000000161 | 6.91E-08    | 0.000000137 |
| 0.000770533 | 0.000168113 | 0.000558202 |
| 0.0000547   | 0.0000444   | 0.0000999   |
| 0.000026    | 0.000000225 | 0           |
| 0.0000336   | 0.0000382   | 0.0000592   |
| 0.0000214   | 0.0000441   | 0.00000259  |
| 0.0000194   | 0.0000108   | 0.00000822  |
| 0.000337359 | 0.000214711 | 0.000513475 |
| 0.0000346   | 0.0000214   | 0.00000505  |
| 0.00000298  | 0.0000366   | 0.0000276   |
| 0.000000214 | 0.000000108 | 0.000000436 |
| 0.000015    | 0.0000148   | 0.00002     |
| 0.0000416   | 0.0000973   | 0.000334668 |
| 0.000465518 | 0.000170838 | 0.000481681 |
| 0.000000259 | 0.000000112 | 0.000000227 |
| 0.000000259 | 0.000000112 | 0.000000227 |
| 0.000228748 | 0.000102848 | 0.000446619 |
| 0.000531927 | 0.000184768 | 0.000664413 |
| 0.00035258  | 0.0000646   | 0.0000766   |
| 0.000092    | 0.0000434   | 0.000141335 |
| 0.000016    | 0.000000164 | 0.000000835 |
| 0.000383956 | 0.000200795 | 0.000389885 |
| 0.00000085  | 0.0000101   | 0.0000753   |
| 0.00042519  | 0.000205845 | 0.000599165 |
| 0.000391305 | 0.000154231 | 0.000395244 |
| 0.00000454  | 0.00000574  | 0.0000165   |
| 0.000645235 | 0.000238181 | 0.000779923 |
| 0.000000381 | 0.000000878 | 0.00000213  |
| 0           | 2.43E-08    | 7.22E-08    |
| 0.000000673 | 0.00000156  | 0.00000327  |
| 0.000000573 | 0.000000311 | 0.000000763 |
| 0.00000313  | 0.00000308  | 0.00000105  |
| 0.000000616 | 0.000000333 | 0.00000083  |
| 0           | 0.000000183 | 0.00000016  |
| 0           | 0.000000183 | 0.00000016  |
| 0.000000735 | 0.000000396 | 0.000000958 |
| 0.000320516 | 0.000164624 | 0.000593285 |
| 0           | 2.65E-08    | 7.69E-08    |
| 0           | 3.44E-08    | 0.00000011  |
| 0.0000266   | 0.000000159 | 0           |
| 0           | 0.0000226   | 0.0000569   |
| 0.000000855 | 0.00000046  | 0.0000011   |

|             |             |             |
|-------------|-------------|-------------|
| 0.000434515 | 0.000260522 | 0.000501325 |
| 0.0000175   | 0.0000124   | 0.0000327   |
| 0.000549019 | 0.000342333 | 0.000763714 |
| 0.000000975 | 0.000000523 | 0.00000125  |
| 0           | 0.000000022 | 7.17E-08    |
| 0           | 2.77E-08    | 5.94E-08    |
| 0           | 0.000000042 | 8.08E-08    |
| 0.0000001   | 0.000000101 | 0           |
| 0           | 5.23E-08    | 7.96E-08    |
| 0.000373086 | 0.000185506 | 0.000462377 |
| 0.00034418  | 0.0000728   | 0.0000816   |
| 0           | 2.88E-08    | 0.0000001   |
| 0.000000734 | 0.000000466 | 0.000000959 |
| 0           | 0.0000135   | 0           |
| 0.0000316   | 0.0000609   | 0.0000189   |
| 0.000395829 | 0.000233633 | 0.000382841 |
| 0.000435813 | 0.000285069 | 0.000502284 |
| 0           | 5.23E-08    | 0.000000159 |
| 0.0000115   | 0.0000236   | 0.0000181   |
| 0.000388458 | 0.000223194 | 0.000326865 |
| 0.000000263 | 0           | 0.000000449 |
| 0           | 0.000000296 | 0           |
| 0.0000448   | 0.0000822   | 0.0000278   |
| 0           | 4.67E-08    | 9.75E-08    |
| 0.000337359 | 0.000245142 | 0.000515207 |
| 0.00025639  | 0.000218113 | 0.00049578  |
| 0.0000988   | 0.0000312   | 0.0000241   |
| 0.00000466  | 0.00000231  | 0.00000258  |
| 0.000122223 | 0.00012165  | 0.000428176 |
| 0           | 0.000000048 | 9.76E-08    |
| 0           | 0.000000021 | 0.000000706 |
| 0.00000235  | 0.000000544 | 0.000000765 |
| 0.000000339 | 9.97E-08    | 0.000000511 |
| 0           | 5.14E-08    | 9.78E-08    |
| 0           | 0.00000061  | 0           |
| 0.000000321 | 0.00000014  | 0.000000603 |
| 0.0000597   | 0.0000538   | 0.00000799  |
| 0.0000185   | 0.000014    | 0.0000144   |
| 0           | 0.000000038 | 0.000000772 |
| 0           | 7.83E-08    | 0.000000627 |
| 0.0000562   | 0.000092    | 0.00003     |
| 0           | 0.000000035 | 3.45E-08    |
| 0.00113809  | 0.000625585 | 0.000936815 |
| 0.000015    | 0.0000431   | 0.00000121  |
| 0           | 4.98E-08    | 0.000000048 |
| 0.0000222   | 0.0000176   | 0.0000489   |
| 0.0000222   | 0.0000176   | 0.0000489   |

|             |             |             |
|-------------|-------------|-------------|
| 0.0187819   | 0.0145977   | 0.015458    |
| 0.0000169   | 0.000014    | 0.0000126   |
| 0.000000141 | 0.000000704 | 0.000000313 |
| 0.00046237  | 0.000314205 | 0.000417695 |
| 0.00000273  | 0.000000286 | 0           |
| 0.000125823 | 0.000168274 | 0.000510975 |
| 0.00000753  | 0.00000887  | 0.00000215  |
| 0.0000432   | 0.000113891 | 0.0000376   |
| 0.0000363   | 0.0000472   | 0.0000596   |
| 0.0000119   | 0.0000421   | 0.0000422   |
| 0.000286031 | 0.000188335 | 0.000101081 |
| 0.0000854   | 0.0000631   | 0.000098    |
| 0           | 0.000000269 | 0           |
| 0.000000113 | 0.00000403  | 0.000000154 |
| 0.0000414   | 0.000078    | 0.000233718 |
| 0           | 0           | 0           |
| 0.0000189   | 0.0000178   | 0.0000178   |
| 0.0000189   | 0.0000178   | 0.0000178   |
| 0.00000475  | 0.00000908  | 0.000000148 |
| 0           | 0.000000206 | 0.000000157 |
| 0.00033217  | 0.000119044 | 0.000110555 |
| 0           | 0.000000477 | 0           |
| 0           | 0.00000015  | 0           |
| 0.000000148 | 0.000000327 | 0           |
| 0.000479121 | 0.000460562 | 0.000667741 |
| 0           | 0.000000238 | 0           |
| 0.0000014   | 0.00000604  | 0.00000628  |
| 0.000805417 | 0.000469086 | 0.000660313 |
| 0           | 2.85E-08    | 0           |
| 0.0013689   | 0.000906902 | 0.00128861  |
| 0.0000069   | 0.00000754  | 0.00000181  |
| 0.719649    | 0.619134    | 0.707304    |
| 0           | 0.000000451 | 0           |
| 0           | 3.36E-08    | 0           |
| 0.000007    | 0.00000169  | 0.00000153  |
| 0.000974606 | 0.000629187 | 0.000767734 |
| 0.0000705   | 0.000158703 | 0.000260276 |
| 0           | 0           | 0           |
| 0.0000107   | 0.0000288   | 0.000000775 |
| 0           | 0.0000002   | 0.000000319 |
| 0           | 0.000000425 | 0           |
| 0           | 0.000000425 | 0           |
| 0.0000432   | 0.0000648   | 0.0000865   |
| 0.00000215  | 0.00000817  | 0.00000975  |
| 0           | 0.000000382 | 0           |
| 0.000000744 | 0.0000106   | 0.0000328   |
| 0.0000232   | 0.0000913   | 0.0000255   |

|             |             |             |
|-------------|-------------|-------------|
| 0           | 2.85E-08    | 0           |
| 0.000947407 | 0.000607038 | 0.00068719  |
| 0.0000135   | 0.0000137   | 0.0000105   |
| 0           | 0.000000171 | 0           |
| 0           | 0.000000129 | 0           |
| 0           | 0.000000196 | 0           |
| 0           | 0.000000106 | 0.00000018  |
| 0           | 7.55E-08    | 0           |
| 0           | 0.000000106 | 0.000000176 |
| 0.0000141   | 0.0000147   | 0.0000102   |
| 0.0000614   | 0.000074    | 0.0000771   |
| 0           | 0.00000032  | 0           |
| 0.0000467   | 0.0000137   | 0.0000103   |
| 0.0000179   | 0.00000757  | 0.00000682  |
| 0.000165211 | 0.000179222 | 0.000307868 |
| 0.00000173  | 0.00000414  | 0.00000443  |
| 0.000817954 | 0.000705294 | 0.000935115 |
| 0           | 9.73E-08    | 0           |
| 0.0000561   | 0.0000166   | 0.0000126   |
| 0           | 0.00000226  | 0           |
| 0           | 0.000000208 | 0.000000369 |
| 0           | 0.000000526 | 0.000000325 |
| 0           | 0.000000526 | 0.000000325 |
| 0           | 0.000000526 | 0.000000325 |
| 0.000809797 | 0.000548805 | 0.000640975 |
| 0.000809259 | 0.000692772 | 0.000754962 |
| 0           | 0.000000263 | 0           |
| 0           | 0.0000023   | 0           |
| 0.0000242   | 0.0000127   | 0.0000234   |
| 0           | 0.00000221  | 0           |
| 0.0000134   | 0.0000187   | 0.0000105   |
| 0           | 0.00000233  | 0           |
| 0.0000129   | 0.000013    | 0.0000083   |
| 0.000497078 | 0.000359685 | 0.000374688 |
| 0.0000117   | 0.0000137   | 0.00000903  |
| 0           | 8.74E-08    | 0           |
| 0.0000127   | 0.0000136   | 0.0000072   |
| 0.0000136   | 0.0000137   | 0.00000757  |
| 0.0000136   | 0.0000137   | 0.00000757  |
| 0           | 0           | 0           |
| 0.000844915 | 0.000735836 | 0.000794358 |
| 0.00078939  | 0.000714654 | 0.000756751 |
| 0           | 0.000120879 | 0           |
| 0           | 0.00000269  | 0           |
| 0           | 0           | 0           |
| 0           | 0           | 0           |
| 0           | 0.000278899 | 0           |



|             |             |             |
|-------------|-------------|-------------|
| 0           | 0.00000242  | 0           |
| 0           | 0.00000242  | 0           |
| 0.0000119   | 0.0000143   | 0.00000751  |
| 0           | 0.00000243  | 0           |
| 0           | 0.00000331  | 0           |
| 0.000773851 | 0.000312381 | 0.000153709 |
| 0           | 0.000000391 | 0           |
| 0.0000411   | 0.000119903 | 0.000248834 |
| 0           | 0.00000267  | 0           |
| 0.000702189 | 0.000457394 | 0.000412092 |
| 0           | 0.00000253  | 0           |
| 0.00000199  | 0.00000482  | 0.00000455  |
| 0           | 0.00000259  | 0           |
| 0           | 0.00000124  | 0.000000428 |
| 0.0000111   | 0.0000146   | 0.00000824  |
| 0           | 0.00000305  | 0           |
| 0           | 5.12E-08    | 0           |
| 0.000000126 | 0.00000014  | 0.000000383 |
| 0           | 0.000000183 | 0           |
| 0           | 0.000000223 | 0           |
| 0           | 0.00000028  | 0           |
| 0           | 0.00000271  | 0           |
| 0.000015    | 0.0000203   | 0.0000123   |
| 0           | 0.00000269  | 0           |
| 0.0000107   | 0.0000146   | 0.00000785  |
| 0           | 6.49E-08    | 0           |
| 0           | 0.00000284  | 0           |
| 0.00000649  | 0.00000459  | 0.00000419  |
| 0           | 0.00000267  | 0           |
| 0           | 0.00000267  | 0           |
| 0           | 0           | 0           |
| 0           | 0           | 0           |
| 0.000286233 | 0.000371063 | 0.00051957  |
| 0.000584799 | 0.00063928  | 0.000659295 |
| 0.000584799 | 0.00063928  | 0.000659295 |
| 0.0000101   | 0.0000127   | 0.00000725  |
| 0.0000182   | 0.0000323   | 0.0000161   |
| 0           | 0.00000322  | 0           |
| 0.0000108   | 0.0000147   | 0.00000737  |
| 0.0000108   | 0.0000147   | 0.00000735  |
| 0           | 0.00226697  | 0           |
| 0           | 0.00391522  | 0           |
| 0           | 0.00209086  | 0           |
| 0           | 0.000190467 | 0           |
| 0           | 0.00624191  | 0           |
| 0           | 0.0169219   | 0           |
| 0           | 0.000725753 | 0           |

|             |             |            |
|-------------|-------------|------------|
| 0           | 0.00366992  | 0          |
| 0           | 0.0021318   | 0          |
| 0           | 0           | 0          |
| 0           | 0.00187471  | 0          |
| 0           | 0           | 0          |
| 0           | 0.00502329  | 0          |
| 0           | 0.000226613 | 0          |
| 0           | 0.00284175  | 0          |
| 0           | 0.00488561  | 0          |
| 0           | 0.00274171  | 0          |
| 0           | 0.000906519 | 0          |
| 0           | 0.00293051  | 0          |
| 0           | 0.00248231  | 0          |
| 0           | 0.00166867  | 0          |
| 0           | 0.00733657  | 0          |
| 0           | 0.00444967  | 0          |
| 0           | 0.000533479 | 0          |
| 0           | 0.00257761  | 0          |
| 0           | 0.00179263  | 0          |
| 0           | 0.00259052  | 0          |
| 0           | 0.0036201   | 0          |
| 0           | 0.00140614  | 0          |
| 0           | 0.00217612  | 0          |
| 0           | 0.00277936  | 0          |
| 0           | 0.00949905  | 0          |
| 0           | 0.00947023  | 0          |
| 0           | 0.00412105  | 0          |
| 0           | 0.00885475  | 0          |
| 0           | 0.00493674  | 0          |
| 0           | 0.00117959  | 0          |
| 0           | 0.0175038   | 0          |
| 0           | 0.00286032  | 0          |
| 0           | 0.00272806  | 0          |
| 0           | 0.000125907 | 0          |
| 0           | 0.0000433   | 0          |
| 0           | 0.00275008  | 0          |
| 0           | 0.000956509 | 0          |
| 0.000662723 | 0           | 0.00293014 |
| 0           | 0.00162847  | 0          |
| 0           | 0.00161988  | 0          |
| 0           | 0.000611961 | 0          |
| 0           | 0.0122044   | 0          |
| 0.00099862  | 0.0015574   | 0          |
| 0           | 0.0153212   | 0          |
| 0           | 0.000851997 | 0          |
| 0           | 0.00079605  | 0          |
| 0           | 0.0000953   | 0          |

|            |             |             |
|------------|-------------|-------------|
| 0.00174809 | 0           | 0           |
| 0          | 0.00115515  | 0           |
| 0          | 0.000367648 | 0           |
| 0          | 0.00073831  | 0           |
| 0          | 0.00209018  | 0           |
| 0          | 0.00043649  | 0           |
| 0          | 0.0022435   | 0           |
| 0          | 0.000853886 | 0           |
| 0          | 0.002975    | 0           |
| 0          | 0           | 0           |
| 0          | 0.00275952  | 0           |
| 0          | 0.0024497   | 0           |
| 0          | 0.00121257  | 0           |
| 0          | 0.0003027   | 0           |
| 0          | 0.000132584 | 0           |
| 0          | 0.000199352 | 0           |
| 0          | 0.00153863  | 0           |
| 0          | 0.00168184  | 0           |
| 0          | 0.00369082  | 0           |
| 0          | 0.00278855  | 0           |
| 0          | 0.00549777  | 0           |
| 0          | 0.000853823 | 0           |
| 0          | 0.000750284 | 0           |
| 0          | 0.000957559 | 0           |
| 0          | 0           | 0.00167848  |
| 0          | 0.000100005 | 0           |
| 0.00565867 | 0           | 0.00240917  |
| 0          | 0           | 0.000778311 |
| 0          | 0.0000709   | 0           |
| 0          | 0.000273648 | 0           |
| 0          | 0.000171195 | 0           |
| 0          | 0           | 0           |
| 0          | 0.00082551  | 0           |
| 0          | 0.000410833 | 0           |
| 0          | 0.0019538   | 0           |
| 0          | 0.00353875  | 0           |
| 0          | 0.00280409  | 0           |
| 0          | 0.00626886  | 0           |
| 0          | 0.00028024  | 0           |
| 0          | 0.00375562  | 0           |
| 0          | 0           | 0.000587702 |
| 0          | 0           | 0           |
| 0          | 0.000645441 | 0           |
| 0          | 0.000737711 | 0           |
| 0          | 0           | 0.0576032   |
| 0          | 0.000973507 | 0           |
| 0          | 0.000618574 | 0           |

|             |             |   |
|-------------|-------------|---|
| 0           | 0.000537345 | 0 |
| 0           | 0.000812082 | 0 |
| 0           | 0           | 0 |
| 0           | 0.00191045  | 0 |
| 0           | 0.000815602 | 0 |
| 0           | 0.00041613  | 0 |
| 0           | 0           | 0 |
| 0.00542572  | 0           | 0 |
| 0.000753412 | 0           | 0 |
| 0           | 0.0000883   | 0 |
| 0.000310288 | 0           | 0 |
| 0           | 0.000613186 | 0 |
| 0           | 0.00123698  | 0 |
| 0           | 0.0000671   | 0 |
| 0           | 0.00250648  | 0 |
| 0           | 0.000837324 | 0 |
| 0           | 0.000819953 | 0 |
| 0           | 0.00859277  | 0 |
| 0           | 0.00174244  | 0 |
| 0           | 0.00164903  | 0 |
| 0           | 0.000852202 | 0 |
| 0           | 0.00021853  | 0 |
| 0           | 0.00105129  | 0 |
| 0.000538061 | 0           | 0 |
| 0.00158047  | 0           | 0 |
| 0           | 0           | 0 |
| 0           | 0.000471418 | 0 |
| 0           | 0.00411886  | 0 |
| 0           | 0.0000769   | 0 |
| 0           | 0.00238824  | 0 |
| 0           | 0.00421208  | 0 |
| 0           | 0.00109441  | 0 |
| 0           | 0.000648298 | 0 |
| 0           | 0.000436926 | 0 |
| 0           | 0.00871396  | 0 |
| 0           | 0.000804642 | 0 |
| 0           | 0.000578805 | 0 |
| 0           | 0           | 0 |
| 0           | 0.0000823   | 0 |
| 0           | 0           | 0 |
| 0           | 0           | 0 |
| 0           | 0.00217604  | 0 |
| 0           | 0           | 0 |
| 0.0000957   | 0           | 0 |
| 0           | 0.00000572  | 0 |
| 0           | 0.0000014   | 0 |
| 0           | 7.28E-08    | 0 |

|             |             |             |
|-------------|-------------|-------------|
| 0           | 0.000000989 | 0           |
| 0           | 0.000000435 | 0           |
| 0           | 0.000000793 | 0           |
| 0           | 0.000000462 | 0           |
| 0           | 0.00000123  | 0           |
| 0           | 0.000000771 | 0           |
| 0           | 0.00000233  | 0           |
| 0           | 0.00000149  | 0           |
| 0           | 0.000000756 | 0           |
| 0           | 0.000000727 | 0           |
| 0           | 0.000000753 | 0           |
| 0           | 0.00000897  | 0           |
| 0           | 0.00000359  | 0           |
| 0           | 0.000000843 | 0           |
| 0           | 0.0000125   | 0           |
| 0           | 0.000000838 | 0           |
| 0.00000108  | 0           | 0           |
| 0           | 0           | 0.000014    |
| 0           | 0.000000143 | 0           |
| 0           | 0.00000091  | 0           |
| 0           | 0.000000353 | 0           |
| 0           | 0.000000155 | 0           |
| 0           | 0.00000561  | 0           |
| 0           | 0.000000825 | 0           |
| 0           | 0.00000065  | 0           |
| 0           | 5.73E-08    | 0           |
| 0           | 0.00000102  | 0           |
| 0.00000186  | 0           | 0.000000382 |
| 0           | 0           | 0           |
| 0           | 0.000000171 | 0           |
| 0           | 0.000000602 | 0           |
| 0           | 0.00000811  | 0           |
| 0           | 0.00000219  | 0           |
| 0           | 0.00000145  | 0           |
| 0           | 0.000000941 | 0           |
| 0           | 0.00000117  | 0           |
| 0           | 0.00000144  | 0           |
| 0           | 0.00000152  | 0           |
| 0.000000491 | 0           | 0           |
| 0           | 0           | 0.000001    |
| 0           | 0           | 0.0000117   |
| 0           | 0.000000209 | 0           |
| 0           | 0.0000011   | 0           |
| 0.00000111  | 0           | 0           |
| 0.0000022   | 0           | 0           |
| 0           | 0.00000018  | 0           |
| 0           | 0           | 0           |

|             |             |             |
|-------------|-------------|-------------|
| 0           | 0           | 0           |
| 0           | 0.0000018   | 0           |
| 0           | 7.78E-08    | 0           |
| 0           | 0.000000533 | 0           |
| 0           | 0.000000866 | 0           |
| 0           | 0.00000119  | 0           |
| 0           | 0.000000957 | 0           |
| 0           | 0.00000256  | 0           |
| 0           | 6.13E-08    | 0           |
| 0           | 0.000000744 | 0           |
| 0           | 0.00000128  | 0           |
| 0           | 0.000000181 | 0           |
| 0           | 0.00000147  | 0           |
| 0           | 0.0000019   | 0           |
| 0           | 0.00000644  | 0           |
| 0           | 0.00000416  | 0           |
| 0           | 0.0000005   | 0           |
| 0           | 0.0000123   | 0           |
| 0           | 0.000000273 | 0           |
| 0           | 0           | 0.000000199 |
| 0           | 0.00000104  | 0           |
| 0.00000127  | 0           | 0           |
| 0           | 0.000000927 | 0           |
| 0           | 0.00000386  | 0           |
| 0           | 0           | 0.000000265 |
| 0           | 0.000000221 | 0           |
| 0           | 5.34E-08    | 0           |
| 0           | 0.00000119  | 0           |
| 0           | 0.000000625 | 0           |
| 0           | 0           | 0           |
| 0.000000159 | 0           | 0           |
| 0           | 0.00000103  | 0           |
| 0           | 0.000000963 | 0           |
| 0           | 0.00000303  | 0           |
| 0           | 0.000000194 | 0           |
| 0           | 5.58E-08    | 0           |
| 0           | 0.00000124  | 0           |
| 0           | 0.000000584 | 0           |
| 0           | 0.000006    | 0           |
| 0           | 0.00000252  | 0           |
| 0           | 0.00000185  | 0           |
| 0           | 0.00000221  | 0           |
| 0           | 0           | 0           |
| 0           | 0.000000168 | 0           |
| 0           | 0.0000133   | 0           |
| 0.000000221 | 0.000000172 | 0           |
| 0           | 0.0000128   | 0           |

|             |             |            |
|-------------|-------------|------------|
| 0           | 0.00000112  | 0          |
| 0           | 0.00000019  | 0          |
| 0.00000123  | 0           | 0          |
| 0           | 5.35E-08    | 0          |
| 0           | 0.000000162 | 0          |
| 0           | 5.37E-08    | 0          |
| 0           | 0.000000172 | 0          |
| 0           | 0.000000162 | 0          |
| 0           | 0.000000143 | 0          |
| 0           | 0.000000287 | 0          |
| 0           | 5.61E-08    | 0          |
| 0           | 0.000000345 | 0          |
| 0           | 0.00000112  | 0          |
| 0           | 0.000000416 | 0          |
| 0           | 0.000000305 | 0          |
| 0           | 0.000000659 | 0          |
| 0           | 0.000000114 | 0          |
| 0           | 0           | 0.000014   |
| 0           | 0.000000269 | 0          |
| 0           | 0.000000209 | 0          |
| 0           | 0.000000231 | 0          |
| 0           | 0.000000239 | 0          |
| 0           | 0.000000189 | 0          |
| 0           | 0.000000127 | 0          |
| 0           | 0           | 0          |
| 0           | 0.000000676 | 0          |
| 0           | 0.000000125 | 0          |
| 0           | 0.000000162 | 0          |
| 0           | 0.000000159 | 0          |
| 0           | 0.000000597 | 0          |
| 0           | 0.000000529 | 0          |
| 0           | 0.000000787 | 0          |
| 0           | 0.000000264 | 0          |
| 0           | 0.000000138 | 0          |
| 0           | 0.000000831 | 0          |
| 0           | 0.000000623 | 0          |
| 0           | 0.000000127 | 0          |
| 0           | 0.000000165 | 0          |
| 0           | 0.000000855 | 0          |
| 0           | 0.000000675 | 0          |
| 0.00000147  | 0           | 0          |
| 0           | 0           | 0.00000015 |
| 0.00000142  | 0           | 0          |
| 0           | 0.000000163 | 0          |
| 0           | 5.52E-08    | 0          |
| 0           | 0           | 0          |
| 0.000000985 | 0           | 0          |

|             |             |             |
|-------------|-------------|-------------|
| 0           | 0           | 0           |
| 0           | 0           | 0.000016    |
| 0           | 0.00000654  | 0           |
| 0           | 0           | 0           |
| 0           | 0.0000125   | 0           |
| 0           | 0.0000127   | 0           |
| 0           | 4.14E-08    | 0           |
| 0           | 0.00000144  | 0           |
| 0           | 0.00000104  | 0           |
| 0           | 0.00000153  | 0           |
| 0           | 0.00000423  | 0           |
| 0           | 0.00000622  | 0           |
| 0           | 0           | 0           |
| 0           | 0.000000641 | 0           |
| 0           | 0.00000148  | 0           |
| 0           | 0.000000143 | 0           |
| 0           | 0.0000117   | 0           |
| 0           | 5.82E-08    | 0           |
| 0           | 0           | 0           |
| 0           | 0           | 0           |
| 0           | 0.000000567 | 0           |
| 0           | 0.0000029   | 0           |
| 0           | 0.000000846 | 0           |
| 0.00000157  | 0           | 0           |
| 0           | 0.000000243 | 0           |
| 0           | 0.00000241  | 0           |
| 0           | 0.00000137  | 0           |
| 0           | 0           | 0.000000124 |
| 0           | 0           | 0.000000648 |
| 0           | 0           | 0.0000301   |
| 0           | 0.00000345  | 0           |
| 0.000000134 | 0           | 0           |
| 0           | 0.00000095  | 0           |
| 0           | 0           | 0           |
| 0           | 0           | 0.000000335 |
| 0           | 0.00000233  | 0           |
| 0           | 0           | 0           |
| 0           | 0.00000482  | 0           |
| 0           | 0.00000678  | 0           |
| 0           | 0.00000233  | 0           |
| 0           | 0.000000179 | 0           |
| 0           | 0.000026    | 0           |
| 0           | 0           | 0           |
| 0           | 0.00000141  | 0           |
| 0           | 0           | 0           |
| 0           | 0.00000159  | 0           |
| 0           | 0.000000739 | 0           |



|            |             |            |
|------------|-------------|------------|
| 0          | 0.00000637  | 0          |
| 0          | 0.00000146  | 0          |
| 0          | 0.00000548  | 0          |
| 0          | 0.00000717  | 0          |
| 0          | 0.00000094  | 0          |
| 0          | 0.00000249  | 0          |
| 0          | 0.00000103  | 0          |
| 0          | 0.00000148  | 0          |
| 0          | 0.00000783  | 0          |
| 0          | 0.00000807  | 0          |
| 0          | 0.00000125  | 0          |
| 0          | 0.00000785  | 0          |
| 0          | 0.00000131  | 0          |
| 0          | 0.00000531  | 0          |
| 0          | 0.00000493  | 0          |
| 0          | 0.00000353  | 0          |
| 0          | 0.00000514  | 0          |
| 0          | 0.00000465  | 0          |
| 0          | 0.00000849  | 0          |
| 0          | 0.00000071  | 0          |
| 0          | 0.0000114   | 0          |
| 0          | 0.00000985  | 0          |
| 0          | 0.00000247  | 0          |
| 0          | 0.00000227  | 0          |
| 0          | 0.00000449  | 0          |
| 0          | 0.00000106  | 0          |
| 0.00000105 | 0           | 0.00000465 |
| 0          | 0.0000029   | 0          |
| 0          | 6.33E-08    | 0          |
| 0          | 0.0000106   | 0          |
| 0          | 0.00000237  | 0          |
| 0          | 0.00000841  | 0          |
| 0          | 0.00000105  | 0          |
| 0.00000162 | 0           | 0          |
| 0          | 0.00000011  | 0          |
| 0          | 3.99E-08    | 0          |
| 0          | 3.19E-08    | 0          |
| 0          | 0.000000145 | 0          |
| 0          | 0           | 0          |
| 0          | 0.00000142  | 0          |
| 0          | 0           | 0          |
| 0          | 0.00000994  | 0          |
| 0          | 0.00000388  | 0          |
| 0          | 5.42E-08    | 0          |
| 0          | 0.00000161  | 0          |
| 0          | 0.00000818  | 0          |
| 0          | 0.0000007   | 0          |

|             |             |             |
|-------------|-------------|-------------|
| 0           | 0.00000371  | 0           |
| 0           | 0.00000316  | 0           |
| 0           | 0.000000613 | 0           |
| 0           | 0.000000628 | 0           |
| 0           | 0.000000725 | 0           |
| 0.00000302  | 0           | 0.000000551 |
| 0           | 0           | 5.06E-08    |
| 0           | 0.00000031  | 0           |
| 0           | 8.79E-08    | 0           |
| 0           | 0           | 0           |
| 0           | 0.000000289 | 0           |
| 0           | 0.000000386 | 0           |
| 0           | 0.000000317 | 0           |
| 0           | 0.000000615 | 0           |
| 0           | 0.000000102 | 0           |
| 0           | 0.000000198 | 0           |
| 0           | 0           | 0.000000935 |
| 0           | 0           | 0           |
| 0           | 0.000000101 | 0           |
| 0           | 0.000000176 | 0           |
| 0           | 0           | 0.0000126   |
| 0           | 0.000000132 | 0           |
| 0           | 0.000000116 | 0           |
| 0           | 0.000000276 | 0           |
| 0           | 7.39E-08    | 0           |
| 0           | 0           | 0           |
| 0           | 0.000000214 | 0           |
| 0           | 0.000000181 | 0           |
| 0           | 0.000000027 | 0           |
| 0           | 0           | 0           |
| 0.000000383 | 0           | 0           |
| 0           | 0.000000443 | 0           |
| 0           | 0.000000139 | 0           |
| 0           | 4.54E-08    | 0           |
| 0           | 0.000000686 | 0           |
| 0           | 0.00000004  | 0           |
| 0           | 0.000000309 | 0           |
| 0           | 0.000000461 | 0           |
| 0           | 0.000000624 | 0           |
| 0           | 0.000000108 | 0           |
| 0           | 0.000000152 | 0           |
| 0           | 0.000000635 | 0           |
| 0.000000794 | 0           | 0           |
| 0.000000191 | 0           | 0           |
| 0           | 0           | 0           |
| 0           | 0.000000566 | 0           |
| 0           | 0.000000146 | 0           |

|             |             |            |
|-------------|-------------|------------|
| 0           | 0.0000012   | 0          |
| 0           | 0           | 0          |
| 0           | 0.000000162 | 0          |
| 0           | 0.00000115  | 0          |
| 0           | 0.00000486  | 0          |
| 0           | 0.000000401 | 0          |
| 0           | 0.000000104 | 0          |
| 0           | 0           | 0          |
| 0           | 0.0000011   | 0          |
| 0           | 0           | 0          |
| 0.000000113 | 0           | 0          |
| 0           | 0.00000717  | 0          |
| 0           | 0           | 0          |
| 0           | 0.00000136  | 0          |
| 0           | 0           | 0          |
| 0           | 0.00000235  | 0          |
| 0           | 0.00000146  | 0          |
| 0           | 0.0000011   | 0          |
| 0           | 0.00000164  | 0          |
| 0           | 0.00000147  | 0          |
| 0           | 0.00000102  | 0          |
| 0.0000006   | 0           | 0.00000465 |
| 0.00000191  | 0           | 0          |
| 0           | 0.00000011  | 0          |
| 0           | 0.000000962 | 0          |
| 0           | 0.000000684 | 0          |
| 0           | 0.000000502 | 0          |
| 0           | 0.000000589 | 0          |
| 0           | 0.00000071  | 0          |
| 0           | 0           | 3.45E-08   |
| 0           | 0.000000315 | 0          |
| 0           | 0.000000185 | 0          |
| 0           | 0.00000252  | 0          |
| 0           | 0.00000135  | 0          |
| 0           | 0.000000102 | 0          |
| 0.000000794 | 0           | 0          |
| 0.00000183  | 0           | 0          |
| 0           | 0.000000522 | 0          |
| 0           | 0.00000006  | 0          |
| 0           | 0           | 0          |
| 0           | 0           | 0          |
| 4.36E-08    | 0           | 0          |
| 0           | 0.00000822  | 0          |
| 0           | 0.000000773 | 0          |
| 0.00000095  | 0           | 0          |
| 0           | 0.00000144  | 0          |
| 0           | 0.000000317 | 0          |

|             |             |             |
|-------------|-------------|-------------|
| 0           | 0.00000143  | 0           |
| 0           | 0.00000802  | 0           |
| 0           | 0.00000648  | 0           |
| 0           | 0.00000236  | 0           |
| 0           | 0.000000185 | 0           |
| 0           | 0.0000135   | 0           |
| 0.000000237 | 0.000000189 | 0           |
| 0           | 0.0000133   | 0           |
| 0           | 0.000000202 | 0           |
| 0.000000867 | 0           | 0           |
| 0           | 5.61E-08    | 0           |
| 0           | 0.000000167 | 0           |
| 0           | 5.83E-08    | 0           |
| 0           | 0.000000178 | 0           |
| 0           | 0.000000173 | 0           |
| 0           | 0.00000153  | 0           |
| 0           | 0.00000293  | 0           |
| 0           | 5.89E-08    | 0           |
| 0           | 0.00000311  | 0           |
| 0           | 0           | 0.0000147   |
| 0           | 0.000000263 | 0           |
| 0           | 0.000000231 | 0           |
| 0           | 0.000000222 | 0           |
| 0           | 0.00000243  | 0           |
| 0           | 0.000000199 | 0           |
| 0           | 0.000000651 | 0           |
| 0           | 0.000000135 | 0           |
| 0           | 0.00000162  | 0           |
| 0           | 0.000000633 | 0           |
| 0           | 4.95E-08    | 0           |
| 0.00000121  | 0           | 0           |
| 0           | 0           | 0.000000347 |
| 0           | 0           | 0.0000139   |
| 0           | 6.49E-08    | 0           |
| 0           | 0.0000092   | 0           |
| 0           | 0.00000267  | 0           |
| 0           | 0.000000687 | 0           |
| 9.83E-08    | 0.000000437 | 0           |
| 0           | 0.00000508  | 0           |
| 0           | 0.00000249  | 0           |
| 0           | 0.00000156  | 0           |
| 0           | 0.00000191  | 0           |
| 0           | 0.00000233  | 0           |
| 0           | 0.00000144  | 0           |
| 0.000000697 | 0           | 0.00000437  |
| 0           | 0.0000124   | 0           |
| 0           | 0.0000126   | 0           |

|             |             |             |
|-------------|-------------|-------------|
| 0           | 0.00000172  | 0           |
| 0           | 0.000000173 | 0           |
| 0           | 0.000000115 | 0           |
| 0           | 0.000000902 | 0           |
| 0           | 0.00000216  | 0           |
| 0           | 0.000000648 | 0           |
| 0           | 7.78E-08    | 0           |
| 0           | 0.00000108  | 0           |
| 0           | 0.00000109  | 0           |
| 0           | 0           | 0.000000153 |
| 0           | 0.000000355 | 0           |
| 0           | 0           | 0.000000835 |
| 0           | 0.00000209  | 0           |
| 0           | 0.00000203  | 0           |
| 0           | 5.14E-08    | 0           |
| 0           | 9.65E-08    | 0           |
| 0           | 0.00000125  | 0           |
| 0           | 0.00000045  | 0           |
| 0           | 0.0000151   | 0           |
| 0           | 0.000000119 | 0           |
| 0.00000155  | 0           | 0           |
| 0           | 0           | 0           |
| 0           | 0           | 0           |
| 0.0000011   | 0           | 0           |
| 0           | 0.000000259 | 0           |
| 0           | 0.000000459 | 0           |
| 0.000000964 | 0           | 0           |
| 0           | 0           | 0.000000239 |
| 0           | 0           | 0           |
| 0           | 0           | 0.0000259   |
| 0           | 0.00000017  | 0           |
| 0           | 0.000000366 | 0           |
| 8.19E-08    | 0           | 0           |
| 0           | 0           | 0.0000148   |
| 0           | 0           | 0           |
| 0.000000893 | 0           | 0           |
| 0           | 0           | 0           |
| 0.00000112  | 0           | 0           |
| 0.00000111  | 0           | 0           |
| 0           | 0           | 0.0000147   |
| 0.000000727 | 0           | 0           |
| 0           | 0           | 0.000000272 |
| 0           | 0           | 0.000000118 |
| 0           | 0.00000645  | 0           |
| 0.00000142  | 0           | 0           |
| 0.00000103  | 0           | 0           |
| 0           | 0.00000114  | 0           |

|             |             |             |
|-------------|-------------|-------------|
| 0           | 0           | 0           |
| 0.00000142  | 0           | 0           |
| 0           | 0           | 0.000000209 |
| 0.000000727 | 0           | 0           |
| 0           | 0           | 0.000000272 |
| 0           | 0           | 0.000000118 |
| 0.00000121  | 0           | 0           |
| 0           | 0           | 0.000000172 |
| 0           | 0           | 0.000000878 |
| 0           | 0           | 0           |
| 0           | 0           | 0.000000219 |
| 0           | 0.00000096  | 0           |
| 0.00000123  | 0           | 0           |
| 0           | 0.00000113  | 0           |
| 0           | 0.00000245  | 0           |
| 0           | 0           | 0.0000208   |
| 0           | 3.93E-08    | 0           |
| 0           | 0.000000717 | 0           |
| 0           | 0.000000561 | 0           |
| 0           | 0           | 0           |
| 0.000000134 | 0           | 0           |
| 0           | 0           | 0           |
| 0           | 0.00000378  | 0           |
| 0           | 0.000015    | 0           |
| 0           | 0.0000131   | 0           |
| 0.000000952 | 0           | 0           |
| 0           | 0.00000359  | 0           |
| 0           | 0.00000104  | 0           |
| 0           | 0.00000137  | 0           |
| 0           | 0.00000736  | 0           |
| 0           | 0           | 0.000000406 |
| 0           | 0.000000743 | 0           |
| 0           | 0.00000618  | 0           |
| 0           | 0           | 0.000000832 |
| 0           | 0           | 0.0000113   |
| 0           | 0.00000271  | 0           |
| 0           | 0           | 0           |
| 0           | 0.00000964  | 0           |
| 0           | 0           | 0           |
| 0.000000831 | 0           | 0           |
| 0.00000108  | 0           | 0           |
| 0.000000994 | 0           | 0           |
| 0           | 0.000000148 | 0           |
| 0.00000139  | 0           | 0           |
| 0           | 0           | 0.000000302 |
| 0           | 0           | 0.0000153   |
| 0.000000245 | 0           | 0           |

|             |             |             |
|-------------|-------------|-------------|
| 0.00000162  | 0           | 0           |
| 0           | 0           | 0           |
| 0           | 0           | 0.0000287   |
| 0           | 0           | 0           |
| 0.000000235 | 0           | 0           |
| 0           | 0           | 0.0000147   |
| 0.00000115  | 0           | 0           |
| 0           | 0           | 0.000000293 |
| 0           | 0.000000134 | 0           |
| 0           | 0           | 0           |
| 0           | 0           | 0.00000886  |
| 0           | 0           | 0.000000325 |
| 0.00000102  | 0           | 0           |
| 0           | 0.00000731  | 0           |
| 0.000000981 | 0           | 0           |
| 0           | 2.46E-08    | 0           |
| 0           | 0           | 0.000000229 |
| 0           | 0           | 0.00000079  |
| 0           | 0           | 0.0000127   |
| 0           | 4.65E-08    | 0           |
| 0           | 0           | 0           |
| 0           | 0.00000178  | 0           |
| 0           | 0.000000467 | 0           |
| 0           | 0.000000705 | 0           |
| 0           | 0.000000674 | 0           |
| 0           | 0.00000331  | 0           |
| 0.00000054  | 0           | 0.00000409  |
| 0           | 0.00000218  | 0           |
| 0           | 0.00000118  | 0           |
| 0.000000275 | 0           | 0           |
| 0           | 0.00000157  | 0           |
| 0           | 0.000000223 | 0           |
| 0           | 0.00000495  | 0           |
| 0           | 0           | 0.00000888  |
| 0           | 0.00000185  | 0           |
| 0           | 5.27E-08    | 0           |
| 0           | 0           | 0           |
| 0           | 0           | 0           |
| 0           | 0.000000119 | 0           |
| 0           | 0.00000103  | 0           |
| 0           | 0.000000112 | 0           |
| 0           | 0.000000398 | 0           |
| 0           | 0           | 0           |
| 0           | 0           | 0           |
| 0           | 0.00000266  | 0           |
| 0           | 0.00000234  | 0           |
| 0           | 0.000000503 | 0           |

|             |             |             |
|-------------|-------------|-------------|
| 0           | 0           | 0.000000217 |
| 0           | 0           | 0.0000132   |
| 0           | 0.00000218  | 0           |
| 0           | 0           | 0           |
| 0           | 0           | 0           |
| 0           | 0.0000069   | 0           |
| 0           | 0           | 0           |
| 0           | 0.0000151   | 0           |
| 0           | 0.0000133   | 0           |
| 0           | 0.00000013  | 0           |
| 0           | 0.00000151  | 0           |
| 0           | 0.00000112  | 0           |
| 0           | 0.00000188  | 0           |
| 0           | 0.00000441  | 0           |
| 0           | 0.00000656  | 0           |
| 0           | 0           | 0           |
| 0           | 0.000000653 | 0           |
| 0           | 0.00000161  | 0           |
| 0           | 0.000000163 | 0           |
| 0           | 0.0000145   | 0           |
| 0           | 8.24E-08    | 0           |
| 0           | 0           | 0           |
| 0           | 0           | 0           |
| 0           | 0.000000587 | 0           |
| 0.000000915 | 0           | 0           |
| 0.000000848 | 0           | 0           |
| 0           | 0.000000202 | 0           |
| 0.000000143 | 0           | 0.000000924 |
| 0           | 0           | 0           |
| 0           | 0           | 0           |
| 0           | 1.93E-08    | 0           |
| 0           | 0.000000181 | 0           |
| 0           | 0           | 0           |
| 0           | 7.72E-08    | 0           |
| 0           | 0           | 0           |
| 0.000000133 | 0           | 0           |
| 0           | 0.0000023   | 0           |
| 0           | 0.00000202  | 0           |
| 0           | 0           | 0.000000265 |
| 0           | 0           | 0.0000169   |
| 0           | 0.00000258  | 0           |
| 0           | 0.000000148 | 0           |
| 0           | 0           | 0           |
| 0           | 0.0000023   | 0           |
| 0           | 0.00000207  | 0           |
| 0           | 0           | 0.000000326 |
| 0           | 0           | 0.0000172   |



|             |             |             |
|-------------|-------------|-------------|
| 0           | 0.00000242  | 0           |
| 0           | 0.000000142 | 0           |
| 0           | 0           | 0           |
| 0.00000122  | 0           | 0           |
| 0           | 0           | 0.000000227 |
| 0           | 0           | 0.0000215   |
| 0           | 0           | 0           |
| 0.000000174 | 0           | 0.000000102 |
| 0           | 0.00000115  | 0           |
| 0.0000012   | 0           | 0           |
| 0           | 0           | 0.0000133   |
| 0           | 0.000000072 | 0           |
| 0           | 0.00000108  | 0           |
| 0           | 0           | 0.000000048 |
| 0           | 0.00000447  | 0           |
| 0           | 0.00000596  | 0           |
| 0           | 0.00000214  | 0           |
| 0           | 0.000000263 | 0           |
| 0           | 0.0000254   | 0           |
| 0           | 0.0000023   | 0           |
| 0           | 0.0000018   | 0           |
| 0           | 0           | 0           |
| 0           | 0.00000147  | 0           |
| 0           | 0.00000242  | 0           |
| 0           | 0.000000907 | 0           |
| 0           | 0.000000916 | 0           |
| 0           | 0.00000504  | 0           |
| 0           | 0.00000498  | 0           |
| 0           | 0.0000012   | 0           |
| 0           | 0.00000018  | 0           |
| 0.000000684 | 0           | 0.00000444  |
| 0           | 0.00000979  | 0           |
| 0           | 0.000000245 | 0           |
| 0           | 0.0000113   | 0           |
| 0           | 0.00000184  | 0           |
| 0           | 0.00000104  | 0           |
| 0           | 0.000000324 | 0           |
| 0.00000104  | 0           | 0           |
| 0           | 0.000000187 | 0           |
| 0           | 5.78E-08    | 0           |
| 0           | 0           | 0           |
| 0           | 0.00000186  | 0           |
| 0           | 0.00000237  | 0           |
| 0           | 0.000000511 | 0           |
| 0           | 0.000000158 | 0           |
| 0           | 0.000000246 | 0           |
| 0           | 0.0000036   | 0           |

|             |             |             |
|-------------|-------------|-------------|
| 0           | 0.000000541 | 0           |
| 0           | 0.000000579 | 0           |
| 0           | 0.000000573 | 0           |
| 0           | 0.000000208 | 0           |
| 0           | 0           | 0           |
| 0           | 0.000000906 | 0           |
| 0           | 0.000000159 | 0           |
| 0           | 0           | 0.000000131 |
| 0           | 0.000000186 | 0           |
| 0           | 0           | 0.0000124   |
| 0           | 0.000000315 | 0           |
| 0           | 0.000000322 | 0           |
| 0           | 0.000000248 | 0           |
| 0           | 0.000000149 | 0           |
| 0           | 0.000000217 | 0           |
| 0           | 0.000000597 | 0           |
| 0           | 0.00000121  | 0           |
| 0           | 0.000000471 | 0           |
| 0           | 0.000000083 | 0           |
| 0           | 0           | 0           |
| 0           | 0.000000452 | 0           |
| 0           | 0.00000014  | 0           |
| 0           | 0.00000133  | 0           |
| 0           | 0.00000117  | 0           |
| 0           | 0.000000457 | 0           |
| 0           | 0.000000755 | 0           |
| 0           | 0.00000367  | 0           |
| 0           | 0.000000691 | 0           |
| 0           | 0.00000187  | 0           |
| 0.000000229 | 0.000000297 | 0           |
| 0           | 0.0000141   | 0           |
| 0.00000152  | 0           | 0           |
| 0           | 8.59E-08    | 0           |
| 0           | 0.000000225 | 0           |
| 0           | 0.00000228  | 0           |
| 0           | 0.00000116  | 0           |
| 0           | 0           | 0.000000641 |
| 0           | 0.000000351 | 0           |
| 0           | 5.62E-08    | 0           |
| 0           | 0.00000351  | 0           |
| 0           | 0.0000113   | 0           |
| 0           | 0           | 0.000000551 |
| 0           | 0           | 0.0000299   |
| 0           | 0.000000344 | 0           |
| 0           | 0.00000059  | 0           |
| 0.00000064  | 0           | 0           |
| 9.48E-08    | 0           | 0           |

|             |             |             |
|-------------|-------------|-------------|
| 0           | 0.000000154 | 0           |
| 0           | 0.00000121  | 0           |
| 0           | 2.87E-08    | 0           |
| 0           | 0           | 0           |
| 0           | 0.000000431 | 0           |
| 0           | 0.000000213 | 0           |
| 0           | 0           | 0           |
| 0           | 0           | 0           |
| 0           | 0.000000131 | 0           |
| 0           | 0.000000462 | 0           |
| 0           | 0           | 0           |
| 0.00000143  | 0           | 0           |
| 0           | 9.93E-08    | 0           |
| 0           | 0.000000238 | 0           |
| 0.000000238 | 0           | 3.61E-08    |
| 0.000000838 | 0           | 0           |
| 0           | 0           | 0.000000263 |
| 0           | 0           | 0.0000108   |
| 0           | 0           | 0.00000148  |
| 0.00000112  | 0           | 0           |
| 0           | 0           | 0           |
| 0           | 0           | 0           |
| 0.000001    | 0           | 0           |
| 0           | 0.00000392  | 0           |
| 0.00000166  | 0           | 0           |
| 0           | 0.0000039   | 0           |
| 0           | 0           | 0.000000289 |
| 0           | 0           | 0.00000298  |
| 0           | 0.00000455  | 0           |
| 0           | 0           | 0           |
| 0.000000301 | 0           | 0           |
| 0           | 0.00000508  | 0           |
| 0           | 0.00000516  | 0           |
| 0           | 0.00000185  | 0           |
| 0           | 0.000000342 | 0           |
| 0           | 0.0000221   | 0           |
| 0           | 0.00000154  | 0           |
| 0           | 0           | 0           |
| 0           | 0.00000224  | 0           |
| 0           | 0.00000151  | 0           |
| 0           | 7.86E-08    | 0           |
| 0           | 0.00000111  | 0           |
| 0           | 0.000000988 | 0           |
| 0           | 0.00000147  | 0           |
| 0           | 0.000000444 | 0           |
| 0           | 0.00000094  | 0           |
| 0           | 0.00000106  | 0           |

|             |             |             |
|-------------|-------------|-------------|
| 0           | 0.00000105  | 0           |
| 0           | 0.00000233  | 0           |
| 0           | 0.00000234  | 0           |
| 0           | 0.00000171  | 0           |
| 0           | 0.00000072  | 0           |
| 0           | 0.000000742 | 0           |
| 0           | 0.00000141  | 0           |
| 0           | 0.0000009   | 0           |
| 0           | 0.00000144  | 0           |
| 0           | 0.00000111  | 0           |
| 0           | 0.00000653  | 0           |
| 0           | 0.00000674  | 0           |
| 0           | 0.00000126  | 0           |
| 0           | 0.00000894  | 0           |
| 0           | 0.00000421  | 0           |
| 0           | 0.000000791 | 0           |
| 0           | 0.000013    | 0           |
| 0           | 0.00000113  | 0           |
| 0           | 0.00000261  | 0           |
| 0           | 0.0000022   | 0           |
| 0           | 7.17E-08    | 0           |
| 0           | 0.00000893  | 0           |
| 0.000000222 | 0.000000311 | 0           |
| 0           | 0.000000815 | 0           |
| 0           | 0.000000307 | 0           |
| 0.00000116  | 0           | 0           |
| 0           | 0.00000185  | 0           |
| 0           | 0.00000217  | 0           |
| 0           | 0.000000152 | 0           |
| 0           | 0.000000955 | 0           |
| 0           | 0.00000554  | 0           |
| 0           | 0.000000748 | 0           |
| 0           | 0.000000808 | 0           |
| 0           | 0.000000844 | 0           |
| 0           | 0           | 0.000000268 |
| 0.0000031   | 0           | 0           |
| 0           | 0.000000139 | 0           |
| 0           | 0.000004    | 0           |
| 0           | 0.000000771 | 0           |
| 0           | 0.000000212 | 0           |
| 0           | 0           | 0.0000135   |
| 0           | 0.000000889 | 0           |
| 0           | 0.000000363 | 0           |
| 0           | 0.000000543 | 0           |
| 0           | 0.00000267  | 0           |
| 0           | 0.000000295 | 0           |
| 0           | 0.00000117  | 0           |

|             |             |             |
|-------------|-------------|-------------|
| 0           | 3.69E-08    | 0           |
| 0           | 0.00000657  | 0           |
| 0           | 0.00000432  | 0           |
| 0           | 0.00000307  | 0           |
| 0           | 0.00000454  | 0           |
| 0           | 0.00000064  | 0           |
| 0           | 0.000000707 | 0           |
| 0           | 0.000000456 | 0           |
| 0           | 0.00000136  | 0           |
| 0           | 0.000000513 | 0           |
| 0           | 0.00000131  | 0           |
| 0           | 6.78E-08    | 0           |
| 0           | 0.0000066   | 0           |
| 0           | 0           | 0.000000114 |
| 0           | 0.00000598  | 0           |
| 0           | 0           | 0           |
| 0           | 0.00000178  | 0           |
| 0           | 0.00000228  | 0           |
| 0           | 0.00000145  | 0           |
| 0           | 0.00000084  | 0           |
| 0           | 0.00000139  | 0           |
| 0           | 0.00000141  | 0           |
| 0           | 0.00000108  | 0           |
| 0.00000144  | 0           | 0           |
| 0           | 0.00000134  | 0           |
| 0           | 0.000000595 | 0           |
| 0           | 0.000000655 | 0           |
| 0           | 0.000000157 | 0           |
| 0           | 0.00000245  | 0           |
| 0           | 0.00000113  | 0           |
| 0           | 0.000000511 | 0           |
| 0.000000986 | 0           | 0           |
| 0           | 0           | 0.000000293 |
| 0           | 0           | 0.0000226   |
| 0           | 0.00000123  | 0           |
| 0           | 0.00000011  | 0           |
| 0           | 0.00000508  | 0           |
| 0           | 0.00000252  | 0           |
| 0           | 0.000000281 | 0           |
| 0           | 0.00000846  | 0           |
| 0           | 0.0000266   | 0           |
| 0           | 0           | 0           |
| 0           | 0.00000239  | 0           |
| 0           | 0           | 0           |
| 0           | 0.000000853 | 0           |
| 0           | 0.000000861 | 0           |
| 0           | 0.00000116  | 0           |

|             |             |             |
|-------------|-------------|-------------|
| 0           | 0.00000301  | 0           |
| 0           | 0.00000206  | 0           |
| 0           | 0.00000112  | 0           |
| 0           | 0.000000702 | 0           |
| 0           | 0.00000118  | 0           |
| 0           | 0.000000802 | 0           |
| 0           | 0.00000175  | 0           |
| 0           | 0.000000795 | 0           |
| 0           | 0.0000007   | 0           |
| 0           | 0.00000672  | 0           |
| 0           | 0.000000869 | 0           |
| 0           | 0.00000863  | 0           |
| 0           | 0.0000125   | 0           |
| 0           | 0.000000696 | 0           |
| 0           | 0.00000293  | 0           |
| 0           | 0.000000162 | 0           |
| 0           | 0.00000136  | 0           |
| 0.000000785 | 0           | 0.00000448  |
| 0           | 0.00000181  | 0           |
| 0           | 0.000000108 | 0           |
| 0           | 0.0000129   | 0           |
| 0.000000259 | 0.000000203 | 0           |
| 0           | 0.00000591  | 0           |
| 0           | 0.00000117  | 0           |
| 0.0000014   | 0           | 0           |
| 0           | 0.000000122 | 0           |
| 0           | 0.00000129  | 0           |
| 0           | 0           | 0           |
| 0           | 0.00000116  | 0           |
| 0           | 0.00000219  | 0           |
| 0           | 0.00000041  | 0           |
| 0           | 0.000000143 | 0           |
| 0           | 0.000000207 | 0           |
| 0           | 0.000000946 | 0           |
| 0           | 0.00000343  | 0           |
| 0           | 0.000000667 | 0           |
| 0           | 0.000000645 | 0           |
| 0           | 0.000000834 | 0           |
| 0           | 0           | 0.000000235 |
| 0           | 0.000000084 | 0           |
| 0           | 0.000000248 | 0           |
| 0           | 2.98E-08    | 0           |
| 0           | 0           | 0           |
| 0           | 8.71E-08    | 0           |
| 0           | 0.00000104  | 0           |
| 0           | 0.000000146 | 0           |
| 0           | 0.000000118 | 0           |

|             |             |             |
|-------------|-------------|-------------|
| 0           | 0           | 0.000000124 |
| 0           | 0.000000228 | 0           |
| 0           | 0.000000182 | 0           |
| 0           | 0.000000243 | 0           |
| 0           | 0.000000246 | 0           |
| 0           | 0           | 0           |
| 0           | 0.00000216  | 0           |
| 0           | 0.0000002   | 0           |
| 0           | 0.000000248 | 0           |
| 0.00000175  | 0           | 0           |
| 0.000000514 | 0           | 0           |
| 0           | 0.000000203 | 0           |
| 0           | 0.000000059 | 0           |
| 0           | 0.00000013  | 0           |
| 0           | 4.41E-08    | 0           |
| 0           | 0.000000946 | 0           |
| 0           | 0.00000022  | 0           |
| 0           | 0.000000496 | 0           |
| 0           | 0.000000784 | 0           |
| 0           | 0.00000105  | 0           |
| 0           | 0.000000575 | 0           |
| 0           | 0.000000722 | 0           |
| 0.000000488 | 0           | 0           |
| 0.00000221  | 0           | 0           |
| 0           | 0           | 0           |
| 0           | 0.000000474 | 0           |
| 0           | 0.00000156  | 0           |
| 0           | 0.000000124 | 0           |
| 0           | 0.000000491 | 0           |
| 0           | 0.000000104 | 0           |
| 0           | 0           | 0           |
| 0           | 0.000000861 | 0           |
| 0           | 0           | 0           |
| 7.71E-08    | 0           | 0           |
| 0.00000145  | 0           | 0           |
| 0           | 0           | 0.000000219 |
| 0           | 0           | 0.0000148   |
| 0           | 0.000000436 | 0           |
| 0.000000096 | 0           | 0           |
| 0.00000144  | 0           | 0           |
| 0           | 0           | 0.000000383 |
| 0           | 0           | 0.0000197   |
| 0           | 0           | 0.0000249   |
| 0           | 0           | 0.0000192   |
| 0           | 0           | 0.000000455 |
| 0           | 0           | 0           |
| 0           | 0           | 0           |

|             |             |           |
|-------------|-------------|-----------|
| 0           | 0.00000992  | 0         |
| 0           | 0.00000746  | 0         |
| 0           | 0.00000873  | 0         |
| 0           | 0           | 0         |
| 0           | 0.00000415  | 0         |
| 0           | 0           | 0         |
| 0           | 0.00000128  | 0         |
| 0           | 0.00000631  | 0         |
| 0           | 0.000001    | 0         |
| 0           | 0.00000241  | 0         |
| 0           | 0.00000145  | 0         |
| 0           | 0.00000822  | 0         |
| 0           | 0.00000129  | 0         |
| 0           | 0.00000179  | 0         |
| 0           | 0.00000125  | 0         |
| 0           | 0.00000127  | 0         |
| 0           | 0.00000149  | 0         |
| 0           | 0.00000303  | 0         |
| 0           | 0.0000139   | 0         |
| 0           | 0.00000179  | 0         |
| 0.00000145  | 0           | 0         |
| 0           | 9.15E-08    | 0         |
| 0           | 0.000000174 | 0         |
| 0           | 0           | 0         |
| 0           | 0.00000555  | 0         |
| 0           | 0.00000131  | 0         |
| 0           | 0.000000546 | 0         |
| 0           | 0.000000731 | 0         |
| 0           | 0.000000791 | 0         |
| 0           | 0           | 5.25E-08  |
| 0           | 0.000000316 | 0         |
| 0           | 0           | 0.0000138 |
| 0           | 0.000000424 | 0         |
| 0           | 0.00000032  | 0         |
| 0           | 0.00000536  | 0         |
| 0           | 0.00000134  | 0         |
| 0.000000797 | 0           | 0         |
| 0.00000189  | 0           | 0         |
| 0           | 0           | 0         |
| 0           | 0.000000506 | 0         |
| 0           | 0.0000158   | 0         |
| 0           | 0.000000228 | 0         |
| 0           | 0           | 0         |
| 0           | 0.00000606  | 0         |
| 0           | 0.000000464 | 0         |
| 0           | 0.00000744  | 0         |
| 0           | 0.00000685  | 0         |



|             |             |            |
|-------------|-------------|------------|
| 0           | 0.000000469 | 0          |
| 0           | 0.00000124  | 0          |
| 0           | 0.000001    | 0          |
| 0           | 0.00000079  | 0          |
| 0           | 0.00000059  | 0          |
| 0           | 0.00000154  | 0          |
| 0           | 0.00000192  | 0          |
| 0           | 0.000000898 | 0          |
| 0           | 0.000000674 | 0          |
| 0.00000131  | 0           | 0          |
| 0           | 0.00000118  | 0          |
| 0           | 5.73E-08    | 0          |
| 0           | 0.000002    | 0          |
| 0           | 0.00000177  | 0          |
| 0           | 0.000000025 | 0          |
| 0           | 6.95E-08    | 0          |
| 0.00000261  | 0           | 0.00000039 |
| 0           | 0.00000021  | 0          |
| 0           | 0           | 0          |
| 0           | 0           | 0          |
| 0.000000394 | 0           | 0          |
| 0           | 0.000000173 | 0          |
| 0           | 0.00000158  | 0          |
| 0           | 0           | 0          |
| 0           | 0.00000459  | 0          |
| 0           | 0.00000569  | 0          |
| 0           | 0.000000449 | 0          |
| 0           | 0.00000195  | 0          |
| 0           | 0           | 0          |
| 0           | 0.0000011   | 0          |
| 0           | 9.16E-08    | 0          |
| 0           | 0.00000105  | 0          |
| 0           | 0.000000705 | 0          |
| 0           | 0.00000155  | 0          |
| 0           | 0.000000673 | 0          |
| 0           | 0.00000078  | 0          |
| 0           | 0.00000112  | 0          |
| 0           | 0.000000942 | 0          |
| 0           | 0.00000165  | 0          |
| 0           | 0.00000199  | 0          |
| 0           | 0.000000115 | 0          |
| 0           | 0.00000127  | 0          |
| 0           | 0.000000807 | 0          |
| 0           | 0.000000747 | 0          |
| 0           | 0.00000165  | 0          |
| 0           | 0.00000105  | 0          |
| 0           | 0.00000166  | 0          |

|             |             |   |
|-------------|-------------|---|
| 0           | 0.000000908 | 0 |
| 0           | 0.00000629  | 0 |
| 0           | 0.00000621  | 0 |
| 0           | 0.000000735 | 0 |
| 0           | 0.0000103   | 0 |
| 0           | 0.00000372  | 0 |
| 0           | 0.000000882 | 0 |
| 0           | 0.0000117   | 0 |
| 0           | 0.000000447 | 0 |
| 0           | 0.00000303  | 0 |
| 0           | 4.03E-08    | 0 |
| 0           | 0.00000171  | 0 |
| 0.000000169 | 0.000000316 | 0 |
| 0           | 0.0000113   | 0 |
| 0           | 0.000000845 | 0 |
| 0           | 2.34E-08    | 0 |
| 0.00000136  | 0           | 0 |
| 0           | 0.000000162 | 0 |
| 0           | 0.000000118 | 0 |
| 0           | 0.00000172  | 0 |
| 0           | 0.000000218 | 0 |
| 0           | 0.00000112  | 0 |
| 0           | 0.00000121  | 0 |
| 0           | 0.00000537  | 0 |
| 0           | 0.00000314  | 0 |
| 0           | 0.000000334 | 0 |
| 0           | 0.000000771 | 0 |
| 0           | 0.000000922 | 0 |
| 0           | 6.95E-08    | 0 |
| 0           | 0.000000114 | 0 |
| 0           | 0.000000255 | 0 |
| 0           | 0.000000104 | 0 |
| 0           | 0.00000471  | 0 |
| 0           | 0.000000167 | 0 |
| 0           | 0.0000123   | 0 |
| 0           | 0           | 0 |
| 0           | 0.000000906 | 0 |
| 0           | 0.000000162 | 0 |
| 0           | 0.000000342 | 0 |
| 0           | 0.00000212  | 0 |
| 0           | 0.000000111 | 0 |
| 0           | 0           | 0 |
| 0.000000418 | 0           | 0 |
| 0           | 0.000000164 | 0 |
| 0           | 0.000000677 | 0 |
| 0           | 0.00000148  | 0 |
| 0           | 5.88E-08    | 0 |

|             |             |             |
|-------------|-------------|-------------|
| 0           | 0.000000927 | 0           |
| 0           | 0.000000497 | 0           |
| 0           | 0.000000357 | 0           |
| 0           | 0.00000063  | 0           |
| 0           | 0.000000733 | 0           |
| 0           | 0.00000114  | 0           |
| 0           | 0.000000552 | 0           |
| 0           | 0.000000156 | 0           |
| 0           | 0           | 0           |
| 0           | 0.00000065  | 0           |
| 0           | 0.000000121 | 0           |
| 0           | 0.000000505 | 0           |
| 0           | 0.000000942 | 0           |
| 0           | 0           | 0           |
| 4.19E-08    | 0           | 0           |
| 0.00000179  | 0           | 0           |
| 0           | 0.00000102  | 0           |
| 0           | 0.00000135  | 0           |
| 0           | 0.00000441  | 0           |
| 0           | 0           | 0.000000236 |
| 0           | 0.000000173 | 0           |
| 0           | 0.000000135 | 0           |
| 0           | 0           | 0           |
| 0.000000409 | 0           | 0           |
| 0.00000167  | 0           | 0.00000326  |
| 0           | 0           | 0.000000561 |
| 0           | 0.00000624  | 0           |
| 0           | 0.00000141  | 0           |
| 0           | 8.06E-08    | 0           |
| 0           | 0.00000102  | 0           |
| 0           | 0.000000781 | 0           |
| 0           | 0.000000444 | 0           |
| 0           | 0.00000082  | 0           |
| 0           | 0.000000478 | 0           |
| 0           | 0.00000131  | 0           |
| 0           | 0.000000783 | 0           |
| 0           | 0.00000226  | 0           |
| 0           | 0.00000163  | 0           |
| 0           | 0.000000837 | 0           |
| 0           | 0.000000894 | 0           |
| 0           | 0.00000122  | 0           |
| 0           | 0.00000109  | 0           |
| 0           | 0.00000111  | 0           |
| 0           | 0.00000126  | 0           |
| 0           | 0.00000063  | 0           |
| 0           | 0.00000584  | 0           |
| 0           | 0.000000536 | 0           |

|             |             |             |
|-------------|-------------|-------------|
| 0           | 0.00000953  | 0           |
| 0           | 0.00000349  | 0           |
| 0           | 0.000000942 | 0           |
| 0           | 0.0000137   | 0           |
| 0           | 0.00000096  | 0           |
| 0.00000104  | 0           | 0           |
| 0           | 0           | 0.000000215 |
| 0.00000328  | 0           | 0.000000428 |
| 0           | 0           | 0.000000185 |
| 0           | 0           | 0.0000141   |
| 0.00000163  | 0           | 0           |
| 0           | 0           | 0           |
| 0.000000523 | 0           | 0           |
| 0           | 0.000000187 | 0           |
| 0           | 0.000000846 | 0           |
| 0           | 0.000000383 | 0           |
| 0           | 0.000000304 | 0           |
| 0           | 0.00000579  | 0           |
| 0           | 0.00000102  | 0           |
| 0           | 0.000000651 | 0           |
| 0           | 0           | 0           |
| 0           | 0           | 0           |
| 0.00000205  | 0           | 0           |
| 0           | 0           | 0.0000223   |
| 0           | 0           | 0.00000009  |
| 0           | 0.00000625  | 0           |
| 0           | 0           | 0           |
| 0           | 0           | 0           |
| 0           | 0.00000226  | 0           |
| 0           | 0.00000142  | 0           |
| 0           | 0.000000732 | 0           |
| 0           | 0.000000979 | 0           |
| 0           | 0.00000102  | 0           |
| 0           | 0.000000901 | 0           |
| 0.00000153  | 0           | 0           |
| 0           | 0.000000103 | 0           |
| 0           | 0.000000553 | 0           |
| 0           | 0.000000595 | 0           |
| 0           | 0.000000542 | 0           |
| 0           | 0.000000185 | 0           |
| 0           | 0.000000154 | 0           |
| 0.00000144  | 0           | 0           |
| 0           | 0.000000176 | 0           |
| 0           | 4.01E-08    | 0           |
| 0.000000554 | 0           | 0           |
| 0.00000186  | 0           | 0           |
| 0           | 0.000000472 | 0           |

|             |             |             |
|-------------|-------------|-------------|
| 0           | 4.64E-08    | 0           |
| 0           | 0           | 0           |
| 0           | 0           | 0           |
| 4.19E-08    | 0           | 0           |
| 0           | 0           | 0.000000395 |
| 0           | 0           | 0.00000028  |
| 0           | 0           | 0.000000433 |
| 0           | 0           | 0.000000328 |
| 0           | 0.00000685  | 0           |
| 0           | 0.00000111  | 0           |
| 0           | 0.00000591  | 0           |
| 0           | 0           | 0           |
| 0           | 8.44E-08    | 0           |
| 0           | 0.000000116 | 0           |
| 0           | 0.000000109 | 0           |
| 0           | 0           | 0           |
| 0           | 0.000000226 | 0           |
| 0           | 0.000000134 | 0           |
| 0           | 0.000000103 | 0           |
| 0           | 0.00000012  | 0           |
| 0           | 0           | 0.000000238 |
| 0           | 0           | 0.000000278 |
| 0           | 0.000000189 | 0           |
| 0           | 9.27E-08    | 0           |
| 0           | 0.000000946 | 0           |
| 0.00000103  | 2.34E-08    | 0           |
| 0.000000582 | 0           | 0           |
| 0           | 0.000000137 | 0           |
| 0.000000615 | 0           | 0           |
| 0.000000222 | 0           | 0           |
| 0           | 0.000000501 | 0           |
| 0           | 0.000000859 | 0           |
| 0           | 0.000000271 | 0           |
| 0           | 0           | 0           |
| 0           | 0           | 0           |
| 0           | 0           | 0           |
| 0           | 0           | 0.0000152   |
| 0           | 0           | 0.000000105 |
| 0.000000164 | 0           | 0           |
| 0           | 0           | 0.000000248 |
| 0           | 0           | 0.0000153   |
| 0           | 0.000000147 | 0           |
| 0           | 0.000000404 | 0           |
| 0           | 0.0000005   | 0           |
| 0           | 0.000000306 | 0           |
| 0           | 0.000000218 | 0           |
| 0           | 0           | 0           |

|             |             |   |
|-------------|-------------|---|
| 0           | 0.00000112  | 0 |
| 0           | 0.00000013  | 0 |
| 0           | 0.00000103  | 0 |
| 0           | 0.00000148  | 0 |
| 0           | 0.000000489 | 0 |
| 0           | 0.000000859 | 0 |
| 0           | 0.00000113  | 0 |
| 0           | 0.00000122  | 0 |
| 0           | 0.00000104  | 0 |
| 0           | 0.00000203  | 0 |
| 0           | 0.00000001  | 0 |
| 0           | 0.00000107  | 0 |
| 0           | 0.000000825 | 0 |
| 0           | 0.000000672 | 0 |
| 0           | 0.00000167  | 0 |
| 0           | 0.00000108  | 0 |
| 0           | 0.00000152  | 0 |
| 0           | 0.00000601  | 0 |
| 0           | 0.00000595  | 0 |
| 0           | 0.00000956  | 0 |
| 0           | 0.0000003   | 0 |
| 0           | 0.000000772 | 0 |
| 0           | 0.000012    | 0 |
| 0           | 0.000000756 | 0 |
| 0           | 0.00000291  | 0 |
| 0           | 4.32E-08    | 0 |
| 0           | 0.00000168  | 0 |
| 0.000000194 | 0.00000033  | 0 |
| 0           | 0.0000121   | 0 |
| 0           | 0.000000827 | 0 |
| 0           | 2.49E-08    | 0 |
| 0.00000142  | 0           | 0 |
| 0           | 0.000000203 | 0 |
| 0           | 0.00000018  | 0 |
| 0           | 0.00000163  | 0 |
| 0           | 0.000000217 | 0 |
| 0           | 0.00000121  | 0 |
| 0           | 0.00000121  | 0 |
| 0           | 0.00000551  | 0 |
| 0           | 0.00000296  | 0 |
| 0           | 7.32E-08    | 0 |
| 0           | 0.000000114 | 0 |
| 0           | 0.000000254 | 0 |
| 0           | 0           | 0 |
| 0           | 0.00000482  | 0 |
| 0           | 0.000000899 | 0 |
| 0           | 0.000000145 | 0 |

|             |             |             |
|-------------|-------------|-------------|
| 0           | 0.000000358 | 0           |
| 0           | 0.00000179  | 0           |
| 0           | 0           | 0           |
| 0.000000429 | 0           | 0           |
| 0           | 0.00000063  | 0           |
| 0           | 0.00000147  | 0           |
| 0           | 5.49E-08    | 0           |
| 0           | 0.000000889 | 0           |
| 0           | 0.000000401 | 0           |
| 0           | 0.000000186 | 0           |
| 0           | 0.00000639  | 0           |
| 0           | 0.000000626 | 0           |
| 0           | 0.00000114  | 0           |
| 0           | 0.000000566 | 0           |
| 0           | 2.95E-08    | 0           |
| 0           | 0           | 0           |
| 0           | 0.000000412 | 0           |
| 0           | 0.00000651  | 0           |
| 0           | 0.00000164  | 0           |
| 0           | 0.000000106 | 0           |
| 0           | 0.000000498 | 0           |
| 0           | 0.00000103  | 0           |
| 0           | 0           | 0           |
| 0           | 0           | 0           |
| 0           | 0.00000285  | 0           |
| 0           | 0.000000149 | 0           |
| 0           | 0.0000018   | 0           |
| 0           | 0.00000305  | 0           |
| 0           | 0.000000454 | 0           |
| 0           | 0.000000189 | 0           |
| 0           | 0.0000011   | 0           |
| 0           | 0.00000139  | 0           |
| 0           | 0.000000626 | 0           |
| 0           | 0.000000612 | 0           |
| 0           | 0.000000561 | 0           |
| 0.00000374  | 0           | 0.000000538 |
| 0           | 0           | 0.000000212 |
| 0           | 0.00000156  | 0           |
| 0           | 4.08E-08    | 0           |
| 0           | 0.000000197 | 0           |
| 0           | 0           | 0           |
| 0           | 0           | 0.0000108   |
| 0           | 0.00000293  | 0           |
| 0           | 0.000000112 | 0           |
| 0           | 0.00000149  | 0           |
| 0           | 0           | 0           |
| 0           | 2.74E-08    | 0           |

|             |             |             |
|-------------|-------------|-------------|
| 0           | 0           | 0           |
| 0           | 0           | 0           |
| 0           | 0           | 0           |
| 0           | 0.00000629  | 0           |
| 0           | 0           | 0           |
| 0           | 0.000012    | 0           |
| 0           | 0.0000126   | 0           |
| 0.00000175  | 0           | 0           |
| 0           | 3.32E-08    | 0           |
| 0           | 0.00000136  | 0           |
| 0           | 0.00000102  | 0           |
| 0           | 0.00000136  | 0           |
| 0           | 0.00000394  | 0           |
| 0           | 0.00000607  | 0           |
| 0           | 0           | 0           |
| 0           | 0.000000629 | 0           |
| 0           | 0.00000147  | 0           |
| 0           | 0.000000117 | 0           |
| 0           | 0.0000108   | 0           |
| 0           | 5.25E-08    | 0           |
| 0           | 0           | 0           |
| 0           | 0           | 0           |
| 0           | 0.000000549 | 0           |
| 0           | 0.00000239  | 0           |
| 0           | 0.00000243  | 0           |
| 0           | 0.00000167  | 0           |
| 0           | 0.00000419  | 0           |
| 0           | 0.00000294  | 0           |
| 0           | 0.000000162 | 0           |
| 0.000000424 | 0           | 0           |
| 0.00000134  | 0           | 0           |
| 0.00000038  | 0           | 0.000000286 |
| 0           | 0.000000796 | 0           |
| 0           | 0.000000149 | 0           |
| 0.00000096  | 0           | 0           |
| 0           | 0           | 0.000000233 |
| 0           | 0           | 0.0000148   |
| 0.000000111 | 0           | 0           |
| 0           | 0           | 0           |
| 0           | 0           | 0           |
| 0           | 0.00000193  | 0           |
| 0           | 0           | 0           |
| 0           | 0           | 0           |
| 0           | 0           | 0           |
| 0           | 0.00000534  | 0           |
| 0           | 0.00000169  | 0           |
| 0           | 0           | 0           |



|             |             |             |
|-------------|-------------|-------------|
| 0           | 0.00000123  | 0           |
| 0           | 0.0000082   | 0           |
| 0           | 0.00000985  | 0           |
| 0           | 0.0000012   | 0           |
| 0.00000115  | 0           | 0           |
| 0           | 0.000000135 | 0           |
| 0           | 0           | 0           |
| 0           | 0.00000157  | 0           |
| 0           | 0.000000597 | 0           |
| 0           | 0.00000218  | 0           |
| 0           | 0.00000375  | 0           |
| 0           | 0.000000852 | 0           |
| 0           | 0           | 0.000000257 |
| 0           | 0.000000195 | 0           |
| 0           | 0           | 0.000000822 |
| 0           | 0           | 0.000012    |
| 0           | 0           | 0           |
| 0           | 0.00000192  | 0           |
| 0           | 0.000000138 | 0           |
| 0           | 0.00000104  | 0           |
| 0           | 0           | 0           |
| 0           | 0.000000122 | 0           |
| 0           | 6.07E-08    | 0           |
| 0           | 0.00000732  | 0           |
| 0           | 0.00000173  | 0           |
| 0           | 0           | 0           |
| 0.000000123 | 0           | 0           |
| 0           | 0.00000827  | 0           |
| 0           | 0.00000201  | 0           |
| 0.00000134  | 0           | 0           |
| 0           | 0.000000123 | 0           |
| 0           | 0           | 0.000000236 |
| 0.000000142 | 0           | 0           |
| 0           | 0.000000102 | 0           |
| 0           | 0.00000617  | 0           |
| 0           | 0           | 0           |
| 0           | 0.00000219  | 0           |
| 0           | 0.00000211  | 0           |
| 0           | 0.00000317  | 0           |
| 0           | 0.00000425  | 0           |
| 0           | 0.000000963 | 0           |
| 0           | 0.00000242  | 0           |
| 0           | 0.00000215  | 0           |
| 0           | 0           | 0.000000025 |
| 0           | 0           | 0.0000188   |
| 0           | 0.00000237  | 0           |
| 0           | 0.000000147 | 0           |

|             |             |             |
|-------------|-------------|-------------|
| 0           | 0.000000159 | 0           |
| 0           | 0           | 0.0000189   |
| 0           | 0           | 0.0000172   |
| 0.00000108  | 0           | 0           |
| 0           | 0           | 0.000000173 |
| 0           | 0           | 0.0000103   |
| 0           | 0.000000197 | 0           |
| 0.000000712 | 0           | 0           |
| 0           | 0           | 0           |
| 0           | 0.00000211  | 0           |
| 0           | 0.00000686  | 0           |
| 0           | 0.00000687  | 0           |
| 0           | 0.00000183  | 0           |
| 0           | 0.00000323  | 0           |
| 0           | 0.000000742 | 0           |
| 0           | 0.00000304  | 0           |
| 0           | 0.00000151  | 0           |
| 0           | 0.000000757 | 0           |
| 0           | 0.00000126  | 0           |
| 0           | 0.00000123  | 0           |
| 0           | 0.00000107  | 0           |
| 0           | 0.00000188  | 0           |
| 0           | 0.00000132  | 0           |
| 0           | 0.00000605  | 0           |
| 0           | 0.00000477  | 0           |
| 0           | 0.00000199  | 0           |
| 0.000000215 | 0           | 0           |
| 0           | 0.00000121  | 0           |
| 0           | 0.000000132 | 0           |
| 0           | 0.00000379  | 0           |
| 0           | 0.00000215  | 0           |
| 0           | 0.000000248 | 0           |
| 0           | 0.00000191  | 0           |
| 0           | 0.00000203  | 0           |
| 0           | 0.00000156  | 0           |
| 0           | 8.43E-08    | 0           |
| 0           | 0.00000117  | 0           |
| 0           | 0.00000128  | 0           |
| 0           | 0.000000465 | 0           |
| 0           | 0.000000816 | 0           |
| 0           | 0.00000123  | 0           |
| 0           | 0.00000185  | 0           |
| 0           | 0.00000192  | 0           |
| 0           | 4.39E-08    | 0           |
| 0           | 0.00000156  | 0           |
| 0           | 0.000000615 | 0           |
| 0           | 0.000000625 | 0           |

|             |             |             |
|-------------|-------------|-------------|
| 0           | 0.00000144  | 0           |
| 0           | 0.000000732 | 0           |
| 0           | 0.00000203  | 0           |
| 0           | 0.0000112   | 0           |
| 0           | 0.00000384  | 0           |
| 0           | 0.000000706 | 0           |
| 0           | 0.00000992  | 0           |
| 0           | 0.00000132  | 0           |
| 0           | 0.00000279  | 0           |
| 0           | 5.33E-08    | 0           |
| 0.000000104 | 0.000000411 | 0           |
| 0           | 0.0000024   | 0           |
| 0           | 0.000000176 | 0           |
| 0.00000153  | 0           | 0           |
| 0           | 3.12E-08    | 0           |
| 0           | 7.56E-08    | 0           |
| 0           | 6.46E-08    | 0           |
| 0           | 6.34E-08    | 0           |
| 0           | 0.000000108 | 0           |
| 0           | 0.00000074  | 0           |
| 0           | 0.00000108  | 0           |
| 0           | 0.00000225  | 0           |
| 0           | 0.00000017  | 0           |
| 0           | 0.00000085  | 0           |
| 0           | 0.0000041   | 0           |
| 0           | 0.00000326  | 0           |
| 0           | 0.00000898  | 0           |
| 0           | 0           | 0.000000306 |
| 0           | 0.000000182 | 0           |
| 0           | 0.00000274  | 0           |
| 0           | 0.00000288  | 0           |
| 0           | 0.000000786 | 0           |
| 0           | 0.00000559  | 0           |
| 0           | 0.000000203 | 0           |
| 0           | 0.000000967 | 0           |
| 0           | 0           | 0.0000176   |
| 0           | 0.00000028  | 0           |
| 0           | 0.0000002   | 0           |
| 0           | 0.00000032  | 0           |
| 0           | 0.000000324 | 0           |
| 0           | 0           | 0           |
| 0           | 0.00000235  | 0           |
| 0           | 5.29E-08    | 0           |
| 0           | 0.000000363 | 0           |
| 0           | 0.000000137 | 0           |
| 0           | 0.000000597 | 0           |
| 0           | 0.000000142 | 0           |

|             |             |            |
|-------------|-------------|------------|
| 0           | 0.00000508  | 0          |
| 0           | 0.00000662  | 0          |
| 0           | 0.00000036  | 0          |
| 0           | 0           | 0          |
| 0           | 0.000000116 | 0          |
| 0           | 0.00000114  | 0          |
| 0           | 0.00000127  | 0          |
| 0           | 0.000000641 | 0          |
| 0           | 0.000000905 | 0          |
| 0           | 0           | 0          |
| 0           | 0.00000056  | 0          |
| 0           | 0           | 0          |
| 0.000000144 | 0           | 0          |
| 0           | 0.00000372  | 0          |
| 0           | 0.00000626  | 0          |
| 0           | 0.00000208  | 0          |
| 0           | 0.000000442 | 0          |
| 0           | 0.00000826  | 0          |
| 0           | 0.0000266   | 0          |
| 0           | 0.00000209  | 0          |
| 0           | 0.00000206  | 0          |
| 0           | 0.00000148  | 0          |
| 0           | 0.000000104 | 0          |
| 0           | 0.000000978 | 0          |
| 0           | 0.00000113  | 0          |
| 0           | 0.000000559 | 0          |
| 0           | 0.000000771 | 0          |
| 0           | 0.00000104  | 0          |
| 0           | 0.00000103  | 0          |
| 0           | 0.00000236  | 0          |
| 0           | 0.00000184  | 0          |
| 0           | 0.000000811 | 0          |
| 0           | 0.00000101  | 0          |
| 0           | 0.00000071  | 0          |
| 0           | 0.00000148  | 0          |
| 0           | 0.00000889  | 0          |
| 0           | 0.00000325  | 0          |
| 0           | 0.000000785 | 0          |
| 0           | 0.0000101   | 0          |
| 0           | 0.0000027   | 0          |
| 0           | 3.53E-08    | 0          |
| 0           | 0.00000107  | 0          |
| 0.000000749 | 0           | 0.00000423 |
| 0           | 0.00000296  | 0          |
| 0           | 0.00000175  | 0          |
| 0           | 0.00000958  | 0          |
| 0.000000105 | 0.000000263 | 0          |

|             |             |             |
|-------------|-------------|-------------|
| 0           | 0.00000298  | 0           |
| 0           | 0.00000228  | 0           |
| 0.000000965 | 0           | 0           |
| 0           | 7.17E-08    | 0           |
| 0           | 5.84E-08    | 0           |
| 0           | 0.00000105  | 0           |
| 0           | 0           | 0           |
| 0           | 0.00000255  | 0           |
| 0           | 2.97E-08    | 0           |
| 0           | 0.00000568  | 0           |
| 0           | 0.00000199  | 0           |
| 0           | 0.00000094  | 0           |
| 0           | 0.00000652  | 0           |
| 0           | 0.00000332  | 0           |
| 0           | 0.00000578  | 0           |
| 0           | 0.00000665  | 0           |
| 0           | 0.00000852  | 0           |
| 0           | 0           | 0.000000217 |
| 0           | 0.000000278 | 0           |
| 0           | 0.000000028 | 0           |
| 0           | 0           | 0           |
| 0           | 0.00000121  | 0           |
| 0           | 8.31E-08    | 0           |
| 0           | 0.000000954 | 0           |
| 0           | 0.00000629  | 0           |
| 0           | 0.00000013  | 0           |
| 0           | 0.000000156 | 0           |
| 0           | 0           | 0.00000112  |
| 0           | 0           | 0           |
| 0           | 0.000000297 | 0           |
| 0           | 0           | 0.000014    |
| 0           | 0.000000268 | 0           |
| 0           | 0.000000253 | 0           |
| 0           | 0           | 0           |
| 0           | 0.00000175  | 0           |
| 0           | 0.000000122 | 0           |
| 0.000000445 | 0           | 0           |
| 0           | 0.000000147 | 0           |
| 0           | 0.000000609 | 0           |
| 0           | 0.000000462 | 0           |
| 0           | 0.00000106  | 0           |
| 0           | 0.000000043 | 0           |
| 0           | 0.000000464 | 0           |
| 0           | 0.000000437 | 0           |
| 0           | 0.000000178 | 0           |
| 0           | 0.00000516  | 0           |
| 0           | 0.00000055  | 0           |

|             |             |            |
|-------------|-------------|------------|
| 0           | 0.000000891 | 0          |
| 0.000000884 | 0           | 0          |
| 0.00000239  | 0           | 0          |
| 0           | 0           | 0          |
| 0           | 0.000000303 | 0          |
| 0           | 0.0000071   | 0          |
| 0           | 0.000000119 | 0          |
| 0           | 0.00000184  | 0          |
| 0           | 0.000000243 | 0          |
| 0           | 0.000000583 | 0          |
| 0           | 0.00000849  | 0          |
| 0           | 5.67E-08    | 0          |
| 0           | 0           | 0          |
| 0           | 0.000000878 | 0          |
| 0           | 0           | 0          |
| 0.000000084 | 0           | 0          |
| 0.00000123  | 0           | 0          |
| 0           | 0.000000216 | 0          |
| 0           | 0.00000721  | 0          |
| 0           | 0.000000144 | 0          |
| 0           | 0.00000108  | 0          |
| 0           | 0.000000734 | 0          |
| 0           | 0.00000122  | 0          |
| 0           | 0.000000586 | 0          |
| 0           | 0.000000661 | 0          |
| 0           | 0.00000107  | 0          |
| 0           | 0.000000807 | 0          |
| 0           | 0.0000018   | 0          |
| 0           | 0.00000105  | 0          |
| 0           | 0.000000918 | 0          |
| 0           | 0.00000109  | 0          |
| 0           | 0.00000132  | 0          |
| 0           | 0.000001    | 0          |
| 0           | 0.00000073  | 0          |
| 0           | 0.0000074   | 0          |
| 0           | 0.00000729  | 0          |
| 0           | 0.000000802 | 0          |
| 0           | 0.0000042   | 0          |
| 0           | 0.000000817 | 0          |
| 0           | 0.00000106  | 0          |
| 0           | 0.00000239  | 0          |
| 0           | 0.00000222  | 0          |
| 0.00000132  | 0           | 0          |
| 0           | 0.000000196 | 0          |
| 0           | 0.00000143  | 0          |
| 0           | 0           | 0.00000035 |
| 0           | 7.17E-08    | 0          |

|  |             |             |             |
|--|-------------|-------------|-------------|
|  | 0           | 0           | 0.0000175   |
|  | 0           | 0           | 0           |
|  | 0           | 0.00000144  | 0           |
|  | 0           | 0.000000595 | 0           |
|  | 0           | 0.000000372 | 0           |
|  | 0           | 0.00000015  | 0           |
|  | 0           | 0.000000603 | 0           |
|  | 0           | 0.000000743 | 0           |
|  | 0           | 0           | 0           |
|  | 0           | 0.00000162  | 0           |
|  | 0           | 0.000000265 | 0           |
|  | 0           | 0           | 0           |
|  | 0.00000133  | 0           | 0           |
|  | 0.00000205  | 0           | 0.000000282 |
|  | 0.000000822 | 0           | 0           |
|  | 0           | 0           | 0           |
|  | 0           | 0.000000147 | 0           |
|  | 0           | 0.000000147 | 0           |
|  | 0           | 0           | 0           |
|  | 0           | 0           | 0           |
|  | 0           | 0           | 0           |
|  | 0.000000957 | 0           | 0           |
|  | 0           | 0           | 0.000000244 |
|  | 0           | 0           | 0.0000134   |
|  | 0           | 0           | 0           |
|  | 0.000000957 | 0           | 0           |
|  | 0           | 0           | 0.000000244 |
|  | 0           | 0           | 0.0000134   |
|  | 0           | 0           | 0           |
|  | 0.000000957 | 0           | 0           |
|  | 0           | 0           | 0.000000244 |
|  | 0           | 0           | 0.0000134   |
|  | 0           | 0           | 0           |
|  | 0           | 0           | 0           |
|  | 0           | 0           | 0           |
|  | 0           | 0           | 0           |
|  | 0.000000887 | 0           | 0           |
|  | 0.0000011   | 0           | 0           |
|  | 0           | 0           | 0.000000262 |
|  | 0           | 0.000000123 | 0           |
|  | 0           | 0           | 0.000000806 |
|  | 0           | 0.000000112 | 0           |
|  | 0           | 0           | 0           |
|  | 0           | 0.000000195 | 0           |
|  | 0           | 0.000000389 | 0           |
|  | 0.000000435 | 0           | 0           |

|             |             |             |
|-------------|-------------|-------------|
| 0           | 0           | 0.000000199 |
| 0           | 0           | 0           |
| 0           | 0           | 0.000019    |
| 0           | 0.000000542 | 0           |
| 0           | 0.00000453  | 0           |
| 0           | 0.00000722  | 0           |
| 0           | 0.00000166  | 0           |
| 0           | 0.00000813  | 0           |
| 0           | 0.0000255   | 0           |
| 0           | 0.0000024   | 0           |
| 0           | 0           | 0           |
| 0           | 0.00000184  | 0           |
| 0           | 0           | 0           |
| 0           | 0.00000109  | 0           |
| 0           | 0.00000137  | 0           |
| 0           | 2.02E-08    | 0           |
| 0           | 0.0000102   | 0           |
| 0.000000143 | 0.000000302 | 0           |
| 0           | 0.00000099  | 0           |
| 0           | 0.00000067  | 0           |
| 0           | 0.000000874 | 0           |
| 0           | 0.000000337 | 0           |
| 0           | 4.21E-08    | 0           |
| 0           | 6.86E-08    | 0           |
| 0           | 2.64E-08    | 0           |
| 0           | 9.54E-08    | 0           |
| 0           | 0.00000013  | 0           |
| 0           | 0.000000131 | 0           |
| 0           | 0.00000013  | 0           |
| 0           | 0.00000207  | 0           |
| 0           | 0.00000243  | 0           |
| 0           | 0.000000608 | 0           |
| 0           | 0.000000226 | 0           |
| 0           | 0.00000123  | 0           |
| 0           | 0.00000126  | 0           |
| 0           | 0.00000473  | 0           |
| 0           | 0.00000356  | 0           |
| 0           | 0.000000917 | 0           |
| 0           | 0.000000935 | 0           |
| 0           | 0.000000971 | 0           |
| 0           | 0.000000129 | 0           |
| 0.00000352  | 0           | 0.000000511 |
| 0           | 0           | 3.09E-08    |
| 0           | 7.36E-08    | 0           |
| 0           | 0.00000137  | 0           |
| 0           | 0.000000121 | 0           |
| 0           | 0.00000375  | 0           |



|             |             |             |
|-------------|-------------|-------------|
| 0           | 0.00000108  | 0           |
| 0           | 0.00000583  | 0           |
| 0           | 0.00000017  | 0           |
| 0           | 0           | 0.000000934 |
| 0           | 0           | 0           |
| 0           | 0.000000289 | 0           |
| 0           | 0           | 0.0000149   |
| 0           | 0.000000259 | 0           |
| 0           | 0.000000319 | 0           |
| 0           | 0.000000289 | 0           |
| 0           | 0.00000157  | 0           |
| 0           | 0.000000262 | 0           |
| 0.000000602 | 0           | 0           |
| 0           | 5.64E-08    | 0           |
| 0           | 0.000000217 | 0           |
| 0           | 0.00000055  | 0           |
| 0           | 0.00000117  | 0           |
| 0           | 3.09E-08    | 0           |
| 0           | 0.00000122  | 0           |
| 0.000000959 | 0           | 0           |
| 0.00000181  | 0           | 0           |
| 0           | 0           | 0           |
| 0           | 0.000000456 | 0           |
| 0           | 0.000000158 | 0           |
| 0           | 0.00000164  | 0           |
| 0           | 0.00000125  | 0           |
| 0           | 0.000000243 | 0           |
| 0           | 0.000000193 | 0           |
| 0           | 0.000000604 | 0           |
| 0           | 0.00000828  | 0           |
| 0           | 0.000000546 | 0           |
| 0           | 0           | 0           |
| 0           | 0.00000101  | 0           |
| 0           | 0           | 0           |
| 0.000000086 | 0           | 0           |
| 0           | 0.00000535  | 0           |
| 0           | 0.00000752  | 0           |
| 0           | 0.00000219  | 0           |
| 0           | 0.00000804  | 0           |
| 0           | 0.0000249   | 0           |
| 0           | 0.00000242  | 0           |
| 0           | 0           | 0           |
| 0           | 0.00000171  | 0           |
| 0           | 0           | 0           |
| 0           | 0.000000984 | 0           |
| 0           | 0.000000134 | 0           |
| 0           | 5.54E-08    | 0           |

|             |             |             |
|-------------|-------------|-------------|
| 0           | 0.00000189  | 0           |
| 0.000000641 | 0           | 0.00000418  |
| 0           | 0.00000197  | 0           |
| 0           | 0.00000129  | 0           |
| 0           | 1.74E-08    | 0           |
| 0           | 0.0000104   | 0           |
| 0.000000123 | 0.000000304 | 0           |
| 0           | 0.00000994  | 0           |
| 0           | 0.000000546 | 0           |
| 0           | 0.000000883 | 0           |
| 0           | 0.000000357 | 0           |
| 0           | 4.62E-08    | 0           |
| 0           | 6.45E-08    | 0           |
| 0           | 0.000000022 | 0           |
| 0           | 0.000000131 | 0           |
| 0           | 0.00000012  | 0           |
| 0           | 0.000000162 | 0           |
| 0           | 0.00000132  | 0           |
| 0           | 0           | 0           |
| 0           | 0.00000209  | 0           |
| 0           | 0.00000233  | 0           |
| 0           | 0.00000062  | 0           |
| 0           | 0.000000232 | 0           |
| 0           | 0.00000122  | 0           |
| 0           | 0.00000179  | 0           |
| 0           | 0.00000481  | 0           |
| 0           | 0.00000377  | 0           |
| 0           | 0.00000104  | 0           |
| 0           | 0.000000892 | 0           |
| 0           | 0.000001    | 0           |
| 0           | 0           | 0.000000252 |
| 0           | 0.000000115 | 0           |
| 0.00000369  | 0           | 0.000000603 |
| 0           | 0           | 0.000000139 |
| 0           | 0.000000169 | 0           |
| 0           | 7.73E-08    | 0           |
| 0           | 0.00000131  | 0           |
| 0           | 0.000000115 | 0           |
| 0           | 0.00000365  | 0           |
| 0           | 0.00000106  | 0           |
| 0           | 0.00000612  | 0           |
| 0           | 0.000000178 | 0           |
| 0           | 0           | 0.000000875 |
| 0           | 0           | 0           |
| 0           | 0.00000027  | 0           |
| 0           | 0           | 0.0000162   |
| 0           | 0.000000364 | 0           |

|             |             |             |
|-------------|-------------|-------------|
| 0           | 0.000000299 | 0           |
| 0           | 0.000000308 | 0           |
| 0           | 0           | 0           |
| 0           | 0.00000216  | 0           |
| 0           | 0.000000309 | 0           |
| 0           | 0           | 0           |
| 0.000000616 | 0           | 0           |
| 0           | 5.51E-08    | 0           |
| 0           | 0.000000628 | 0           |
| 0           | 0.00000119  | 0           |
| 0           | 2.62E-08    | 0           |
| 0           | 0.00000119  | 0           |
| 0.000000867 | 0           | 0           |
| 0.00000236  | 0           | 0           |
| 0           | 0           | 0           |
| 0           | 0.000000532 | 0           |
| 0           | 0.000000148 | 0           |
| 0           | 0.00000159  | 0           |
| 0           | 0.00000124  | 0           |
| 0           | 0.0000003   | 0           |
| 0           | 0.000000298 | 0           |
| 0           | 0.000000588 | 0           |
| 0           | 0.0000116   | 0           |
| 0           | 0.00000063  | 0           |
| 0           | 0           | 0           |
| 0           | 0           | 0           |
| 0           | 0.00000102  | 0           |
| 0           | 0           | 0           |
| 8.13E-08    | 0           | 0           |
| 0           | 0.000000584 | 0           |
| 0           | 0.000000786 | 0           |
| 0           | 0.000000446 | 0           |
| 0           | 0.00000127  | 0           |
| 0           | 5.74E-08    | 0           |
| 0           | 0.00000184  | 0           |
| 0           | 0.000000977 | 0           |
| 0           | 0.00000132  | 0           |
| 0           | 0.00000145  | 0           |
| 0           | 0.00000151  | 0           |
| 0           | 0.000000844 | 0           |
| 0           | 0.00000138  | 0           |
| 0.00000114  | 0           | 0           |
| 0           | 0           | 0           |
| 0           | 0.00000102  | 0           |
| 0           | 0.00000108  | 0           |
| 0           | 0.00000443  | 0           |
| 0           | 0           | 0.000000215 |

|             |             |             |
|-------------|-------------|-------------|
| 0           | 0           | 0.000000176 |
| 0           | 0.00000533  | 0           |
| 0           | 0           | 0.0000129   |
| 0           | 0.00000186  | 0           |
| 0           | 0           | 0           |
| 0           | 0.000000147 | 0           |
| 0           | 0.000000368 | 0           |
| 0           | 0           | 0           |
| 0           | 0.00000056  | 0           |
| 0           | 0.000000781 | 0           |
| 0           | 0.00000113  | 0           |
| 0           | 7.12E-08    | 0           |
| 0           | 0.00000188  | 0           |
| 0           | 0.00000111  | 0           |
| 0           | 0.00000134  | 0           |
| 0           | 0.00000139  | 0           |
| 0           | 0.0000014   | 0           |
| 0           | 0.000000776 | 0           |
| 0           | 0.00000146  | 0           |
| 0.00000116  | 0           | 0           |
| 0           | 0           | 0           |
| 0           | 0.00000151  | 0           |
| 0           | 0.000000896 | 0           |
| 0           | 0.00000111  | 0           |
| 0           | 0.00000424  | 0           |
| 0           | 0           | 0.000000226 |
| 0           | 0           | 0.000000131 |
| 0           | 0.00000525  | 0           |
| 0           | 0           | 0.000000743 |
| 0           | 0           | 0.0000124   |
| 0           | 0.00000203  | 0           |
| 0           | 0           | 0           |
| 0.000000249 | 0           | 0           |
| 0           | 0.000000144 | 0           |
| 0           | 0.000000358 | 0           |
| 0           | 0           | 0           |
| 0           | 0           | 0           |
| 0           | 0.000000675 | 0           |
| 0           | 0.000000628 | 0           |
| 0           | 0.00000611  | 0           |
| 0           | 0.00000628  | 0           |
| 0           | 0.000000659 | 0           |
| 0           | 0.00000126  | 0           |
| 0.00000119  | 0           | 0           |
| 0           | 0           | 0           |
| 0           | 0.000000474 | 0           |
| 0           | 0.000000521 | 0           |

|             |             |            |
|-------------|-------------|------------|
| 0           | 0.00000066  | 0          |
| 0           | 0           | 0.00000914 |
| 0           | 0.00000115  | 0          |
| 0           | 0           | 0          |
| 0           | 0           | 0          |
| 0           | 0           | 0          |
| 0           | 0           | 0          |
| 0           | 0.00000179  | 0          |
| 0           | 0.00000078  | 0          |
| 0           | 0.000000898 | 0          |
| 0           | 0.00000628  | 0          |
| 0           | 0.00000634  | 0          |
| 0           | 0.00000107  | 0          |
| 0.0000012   | 0           | 0          |
| 0           | 3.14E-08    | 0          |
| 0           | 0.000000202 | 0          |
| 0           | 0           | 0          |
| 0           | 0.000000527 | 0          |
| 0           | 0.00000015  | 0          |
| 0           | 0.000000554 | 0          |
| 0           | 0.000000403 | 0          |
| 0           | 0.00000048  | 0          |
| 0           | 0.00000102  | 0          |
| 0           | 0.000000215 | 0          |
| 0           | 0           | 0.00000813 |
| 0           | 0.000000102 | 0          |
| 0           | 0.000000656 | 0          |
| 0           | 0           | 0          |
| 0           | 0           | 0          |
| 0           | 0           | 0          |
| 0.000000234 | 0           | 0          |
| 0           | 0.00000209  | 0          |
| 0           | 0.00000074  | 0          |
| 0           | 0.000000617 | 0          |
| 0           | 0.000000825 | 0          |
| 0           | 0.00000113  | 0          |
| 0           | 0.000000624 | 0          |
| 0.000000602 | 0           | 0          |
| 0           | 0           | 0          |
| 0           | 0           | 0          |
| 0           | 0           | 0          |
| 0           | 0           | 4.92E-08   |
| 0           | 0.00000343  | 0          |
| 0           | 0           | 0          |
| 0           | 0.000000851 | 0          |
| 0           | 0.00000136  | 0          |

|             |             |             |
|-------------|-------------|-------------|
| 0           | 0.00000107  | 0           |
| 0           | 0.0000015   | 0           |
| 0           | 0.00000774  | 0           |
| 0           | 0.000008    | 0           |
| 0           | 0.00000605  | 0           |
| 0           | 0.00000707  | 0           |
| 0           | 0.00000463  | 0           |
| 0           | 0.0000138   | 0           |
| 0           | 0.00000322  | 0           |
| 0           | 6.58E-08    | 0           |
| 0           | 0.000000167 | 0           |
| 0.000000428 | 0           | 0.00000388  |
| 0           | 0.000000102 | 0           |
| 0           | 0.0000114   | 0           |
| 0.000000247 | 0.000000649 | 0           |
| 0           | 0.0000118   | 0           |
| 0           | 0.000000201 | 0           |
| 0           | 4.18E-08    | 0           |
| 0.000000982 | 0           | 0           |
| 0           | 0.000000177 | 0           |
| 0           | 7.92E-08    | 0           |
| 0           | 0.000000168 | 0           |
| 0           | 7.28E-08    | 0           |
| 0           | 0.000000113 | 0           |
| 0           | 0.000000208 | 0           |
| 0           | 0.000000118 | 0           |
| 0           | 0           | 0           |
| 0           | 0.000000104 | 0           |
| 0           | 0.000000244 | 0           |
| 0           | 0.000000285 | 0           |
| 0           | 0.0000001   | 0           |
| 0           | 0.000000102 | 0           |
| 0           | 0.000000603 | 0           |
| 0           | 0.000000395 | 0           |
| 0           | 0.000000289 | 0           |
| 0           | 0.000000066 | 0           |
| 0           | 0.000000125 | 0           |
| 0           | 6.03E-08    | 0           |
| 0           | 0.000000372 | 0           |
| 0           | 0.000000296 | 0           |
| 0           | 0.000000132 | 0           |
| 0           | 6.66E-08    | 0           |
| 0           | 0           | 0.000000104 |
| 0           | 0           | 0           |
| 0           | 0           | 0.000000137 |
| 0           | 0.000000378 | 0           |
| 0           | 0.000000179 | 0           |

|             |             |   |
|-------------|-------------|---|
| 0           | 0.000000324 | 0 |
| 0           | 0           | 0 |
| 0.000000527 | 0           | 0 |
| 0.000000197 | 0           | 0 |
| 0           | 3.24E-08    | 0 |
| 0.0000202   | 0           | 0 |
| 0           | 0.000000425 | 0 |
| 0           | 0.00000121  | 0 |
| 0           | 0.000000638 | 0 |
| 0           | 0           | 0 |
| 0           | 0.000000745 | 0 |
| 0           | 8.75E-08    | 0 |
| 0           | 0.000000242 | 0 |
| 0           | 0.000000233 | 0 |
| 0           | 0.000000429 | 0 |
| 0           | 0.000000708 | 0 |
| 0           | 0.000000471 | 0 |
| 0           | 5.89E-08    | 0 |
| 0           | 0           | 0 |
| 0           | 0           | 0 |
| 0           | 0.000000667 | 0 |
| 0           | 0.000000537 | 0 |
| 0           | 0.000000278 | 0 |
| 0           | 0.000000802 | 0 |
| 0           | 0.000000166 | 0 |
| 0           | 0.000000215 | 0 |
| 0           | 0           | 0 |
| 0           | 0.000000027 | 0 |
| 0           | 0.000000165 | 0 |
| 0           | 0.00000139  | 0 |
| 0.000000198 | 0.000000172 | 0 |
| 0           | 0.00000125  | 0 |
| 0           | 0.0000001   | 0 |
| 0           | 0.000000229 | 0 |
| 0.000000109 | 0           | 0 |
| 0           | 9.46E-08    | 0 |
| 0           | 0.000000016 | 0 |
| 0           | 9.26E-08    | 0 |
| 0           | 0.000000167 | 0 |
| 0           | 0.000000159 | 0 |
| 0           | 0.000000133 | 0 |
| 0           | 0.000000276 | 0 |
| 0           | 7.13E-08    | 0 |
| 0           | 0.000000989 | 0 |
| 0           | 0.000000341 | 0 |
| 0           | 0.00000119  | 0 |
| 0           | 8.58E-08    | 0 |

|             |             |             |
|-------------|-------------|-------------|
| 0           | 0.000000208 | 0           |
| 0           | 0.000000315 | 0           |
| 0           | 0.00000031  | 0           |
| 0           | 0.000000344 | 0           |
| 0           | 0.000000626 | 0           |
| 0           | 0.000000104 | 0           |
| 0           | 0           | 0.000000704 |
| 0           | 0           | 0.0000144   |
| 0           | 0.000000312 | 0           |
| 0           | 0.000000241 | 0           |
| 0           | 0.000000244 | 0           |
| 0           | 0           | 0           |
| 0           | 0.000000262 | 0           |
| 0           | 5.37E-08    | 0           |
| 0           | 0.000000162 | 0           |
| 0           | 0.000000128 | 0           |
| 0           | 0           | 0           |
| 0           | 0.000000633 | 0           |
| 0           | 0.000000126 | 0           |
| 0           | 0.000000163 | 0           |
| 0           | 0.000000174 | 0           |
| 0           | 0.000000134 | 0           |
| 0           | 0.000000635 | 0           |
| 0           | 0.000000933 | 0           |
| 0           | 6.02E-08    | 0           |
| 0           | 0           | 0           |
| 0           | 0.000000106 | 0           |
| 0           | 0.000000496 | 0           |
| 0           | 0.000000649 | 0           |
| 0           | 0.000000884 | 0           |
| 0.000000973 | 0           | 0           |
| 0           | 0.000000169 | 0           |
| 0           | 0.000000145 | 0           |
| 0           | 0           | 0           |
| 0           | 0.000000218 | 0           |
| 0.000000118 | 0           | 0           |
| 0           | 0.000000183 | 0           |
| 0           | 0.000000101 | 0           |
| 0           | 0.000000101 | 0           |
| 0           | 0.000000241 | 0           |
| 0           | 0.000000253 | 0           |
| 0           | 0.000000105 | 0           |
| 0           | 0.000000114 | 0           |
| 0           | 0           | 9.18E-08    |
| 0           | 0           | 0.0000252   |
| 0           | 0.000000423 | 0           |
| 0           | 0.000000207 | 0           |



|             |             |            |
|-------------|-------------|------------|
| 0           | 0           | 0          |
| 0           | 0           | 0          |
| 0           | 0.000000402 | 0          |
| 0.000000557 | 0           | 0          |
| 0           | 0           | 0.00000209 |
| 0           | 0.000000385 | 0          |
| 0           | 0.00000535  | 0          |
| 0           | 0.00000752  | 0          |
| 0           | 0.00000219  | 0          |
| 0           | 0.00000804  | 0          |
| 0           | 0.0000249   | 0          |
| 0           | 0.00000242  | 0          |
| 0           | 0           | 0          |
| 0           | 0.00000171  | 0          |
| 0           | 0           | 0          |
| 0           | 0.000000984 | 0          |
| 0           | 0.000000134 | 0          |
| 0           | 5.54E-08    | 0          |
| 0           | 0.00000189  | 0          |
| 0.000000641 | 0           | 0.00000418 |
| 0           | 0.00000197  | 0          |
| 0           | 0.00000129  | 0          |
| 0           | 1.74E-08    | 0          |
| 0           | 0.0000104   | 0          |
| 0.000000123 | 0.000000304 | 0          |
| 0           | 0.00000994  | 0          |
| 0           | 0.000000546 | 0          |
| 0           | 0.000000883 | 0          |
| 0           | 0.000000357 | 0          |
| 0           | 4.62E-08    | 0          |
| 0           | 6.45E-08    | 0          |
| 0           | 0.000000022 | 0          |
| 0           | 0.000000131 | 0          |
| 0           | 0.000000012 | 0          |
| 0           | 0.000000162 | 0          |
| 0           | 0.000000132 | 0          |
| 0           | 0           | 0          |
| 0           | 0.00000209  | 0          |
| 0           | 0.00000233  | 0          |
| 0           | 0.00000062  | 0          |
| 0           | 0.000000232 | 0          |
| 0           | 0.00000122  | 0          |
| 0           | 0.00000179  | 0          |
| 0           | 0.00000481  | 0          |
| 0           | 0.00000377  | 0          |
| 0           | 0.00000104  | 0          |
| 0           | 0.000000892 | 0          |

|             |             |             |
|-------------|-------------|-------------|
| 0           | 0.000001    | 0           |
| 0           | 0           | 0.000000252 |
| 0           | 0.000000115 | 0           |
| 0.00000369  | 0           | 0.000000603 |
| 0           | 0           | 0.000000139 |
| 0           | 0.000000169 | 0           |
| 0           | 7.73E-08    | 0           |
| 0           | 0.00000131  | 0           |
| 0           | 0.000000115 | 0           |
| 0           | 0.00000365  | 0           |
| 0           | 0.00000106  | 0           |
| 0           | 0.00000612  | 0           |
| 0           | 0.000000178 | 0           |
| 0           | 0           | 0.000000875 |
| 0           | 0           | 0           |
| 0           | 0.00000027  | 0           |
| 0           | 0           | 0.0000162   |
| 0           | 0.000000364 | 0           |
| 0           | 0.000000299 | 0           |
| 0           | 0.000000308 | 0           |
| 0           | 0           | 0           |
| 0           | 0.00000216  | 0           |
| 0           | 0.000000309 | 0           |
| 0           | 0           | 0           |
| 0.000000616 | 0           | 0           |
| 0           | 5.51E-08    | 0           |
| 0           | 0.000000628 | 0           |
| 0           | 0.00000119  | 0           |
| 0           | 2.62E-08    | 0           |
| 0           | 0.00000119  | 0           |
| 0.000000867 | 0           | 0           |
| 0.00000236  | 0           | 0           |
| 0           | 0           | 0           |
| 0           | 0.000000532 | 0           |
| 0           | 0.000000148 | 0           |
| 0           | 0.00000159  | 0           |
| 0           | 0.00000124  | 0           |
| 0           | 0.0000003   | 0           |
| 0           | 0.000000298 | 0           |
| 0           | 0.000000588 | 0           |
| 0           | 0.0000116   | 0           |
| 0           | 0.00000063  | 0           |
| 0           | 0           | 0           |
| 0           | 0           | 0           |
| 0           | 0.00000102  | 0           |
| 0           | 0           | 0           |
| 8.13E-08    | 0           | 0           |

|             |             |             |
|-------------|-------------|-------------|
| 0           | 0.000000204 | 0           |
| 0           | 0.000000393 | 0           |
| 0.000000921 | 0           | 0           |
| 0           | 0           | 0.000000216 |
| 0           | 0           | 0           |
| 0           | 0           | 0.0000227   |
| 0           | 0           | 0           |
| 0           | 0.0000151   | 0           |
| 0.00000158  | 0           | 0           |
| 0           | 0           | 0.000000287 |
| 0           | 0.0000102   | 0           |
| 0           | 0           | 0.0000117   |
| 0           | 0.00000112  | 0           |
| 0           | 0.000000728 | 0           |
| 0           | 0.000000155 | 0           |
| 0           | 0.000000104 | 0           |
| 0           | 0.00000348  | 0           |
| 0           | 0.00000874  | 0           |
| 0           | 0.0000117   | 0           |
| 0.000000811 | 0           | 0           |
| 0           | 0.000000142 | 0           |
| 0           | 0.00000326  | 0           |
| 0           | 0.000000112 | 0           |
| 0           | 0           | 0.000000088 |
| 0           | 0.0000052   | 0           |
| 0           | 0           | 0.00000122  |
| 0           | 0           | 0           |
| 0           | 0.00000289  | 0           |
| 0           | 0.00000031  | 0           |
| 0           | 0.0000118   | 0           |
| 0           | 0.000000143 | 0           |
| 0           | 0           | 0           |
| 0           | 0           | 0           |
| 0           | 0.000000882 | 0           |
| 0           | 0.00000297  | 0           |
| 0           | 0.0000011   | 0           |
| 0           | 0.00000124  | 0           |
| 0           | 0.000000721 | 0           |
| 0           | 0.00000174  | 0           |
| 0           | 0.00000842  | 0           |
| 0           | 0.000000609 | 0           |
| 0.000000888 | 0           | 0.00000496  |
| 0.00000148  | 0           | 0           |
| 0           | 0           | 0           |
| 0           | 0.000000618 | 0           |
| 0           | 0.00000066  | 0           |
| 0           | 0.00000077  | 0           |

|             |             |             |
|-------------|-------------|-------------|
| 0           | 0           | 0.000000244 |
| 0           | 0.00000011  | 0           |
| 0.00000109  | 0           | 0           |
| 0           | 0.0000014   | 0           |
| 0           | 0.000000888 | 0           |
| 0           | 0.000000739 | 0           |
| 0           | 0.000000915 | 0           |
| 0           | 0.000000438 | 0           |
| 0           | 0           | 0           |
| 6.67E-08    | 0           | 0           |
| 0           | 0.00000503  | 0           |
| 0           | 0.00000245  | 0           |
| 0           | 0.000000298 | 0           |
| 0           | 0.00000863  | 0           |
| 0           | 0.0000269   | 0           |
| 0           | 0           | 0           |
| 0           | 0.00000238  | 0           |
| 0           | 0           | 0           |
| 0           | 0.000000953 | 0           |
| 0           | 0.00000122  | 0           |
| 0           | 0.00000289  | 0           |
| 0           | 0.0000022   | 0           |
| 0           | 0.00000116  | 0           |
| 0           | 0.0000007   | 0           |
| 0           | 0.00000128  | 0           |
| 0           | 0.000000849 | 0           |
| 0           | 0.00000162  | 0           |
| 0           | 0.00000833  | 0           |
| 0           | 0.0000131   | 0           |
| 0           | 0.000000733 | 0           |
| 0           | 0.00000284  | 0           |
| 0           | 0.000000171 | 0           |
| 0           | 0.00000461  | 0           |
| 0           | 0.00000166  | 0           |
| 0.000000711 | 0           | 0.00000429  |
| 0           | 0.00000185  | 0           |
| 0           | 0.000000107 | 0           |
| 0           | 0.0000129   | 0           |
| 0.000000263 | 0.000000203 | 0           |
| 0           | 0.0000088   | 0           |
| 0           | 0.00000119  | 0           |
| 0           | 0.000000296 | 0           |
| 0.00000137  | 0           | 0           |
| 0           | 0.000000133 | 0           |
| 0           | 0.00000134  | 0           |
| 0           | 0           | 0           |
| 0           | 0.00000112  | 0           |

|             |             |            |
|-------------|-------------|------------|
| 0           | 0.0000022   | 0          |
| 0           | 0.000000456 | 0          |
| 0           | 0.000000165 | 0          |
| 0           | 0.000000229 | 0          |
| 0           | 0.00000103  | 0          |
| 0           | 0.00000353  | 0          |
| 0           | 0.000000772 | 0          |
| 0           | 0.000000761 | 0          |
| 0           | 0.000000805 | 0          |
| 0.00000397  | 0           | 0.00000045 |
| 0           | 0           | 5.19E-08   |
| 0           | 7.59E-08    | 0          |
| 0           | 3.45E-08    | 0          |
| 0           | 0           | 0          |
| 0           | 8.72E-08    | 0          |
| 0           | 0.00000298  | 0          |
| 0           | 0.00000108  | 0          |
| 0           | 0.000000144 | 0          |
| 0           | 0.000000112 | 0          |
| 0           | 0.000000277 | 0          |
| 0           | 0.00000023  | 0          |
| 0           | 0.000000302 | 0          |
| 0           | 0.000000258 | 0          |
| 0           | 0           | 0          |
| 0           | 0.0000025   | 0          |
| 0           | 0.000000208 | 0          |
| 0           | 0.000000263 | 0          |
| 0.00000192  | 4.38E-08    | 0          |
| 0.000000544 | 0           | 0          |
| 0           | 0.000000235 | 0          |
| 0           | 0.000000588 | 0          |
| 0           | 0.00000144  | 0          |
| 0           | 0.000000037 | 0          |
| 0           | 0.00000077  | 0          |
| 0           | 0.000000404 | 0          |
| 0           | 0.000000217 | 0          |
| 0           | 0.00000482  | 0          |
| 0           | 0.000000814 | 0          |
| 0           | 0.000000909 | 0          |
| 0           | 0.000000608 | 0          |
| 0           | 0.000000852 | 0          |
| 0.000000513 | 0           | 0          |
| 0.00000221  | 0           | 0          |
| 0           | 0           | 0          |
| 0           | 0.000000431 | 0          |
| 0           | 0.00000154  | 0          |
| 0           | 0.000000132 | 0          |

|             |             |            |
|-------------|-------------|------------|
| 0           | 0.000000496 | 0          |
| 0           | 0.00000011  | 0          |
| 0           | 0           | 0          |
| 0           | 0           | 0          |
| 0           | 0.000000903 | 0          |
| 0           | 0           | 0          |
| 0.000000087 | 0           | 0          |
| 0           | 0.00000508  | 0          |
| 0           | 0.00000241  | 0          |
| 0           | 0.00000255  | 0          |
| 0           | 0.00000853  | 0          |
| 0           | 0.0000262   | 0          |
| 0           | 0           | 0          |
| 0           | 0.00000222  | 0          |
| 0           | 0           | 0          |
| 0           | 0.000000863 | 0          |
| 0           | 0.000000863 | 0          |
| 0           | 0.00000116  | 0          |
| 0           | 0.00000282  | 0          |
| 0           | 0.00000217  | 0          |
| 0           | 0.00000106  | 0          |
| 0           | 0.00000067  | 0          |
| 0           | 0.00000123  | 0          |
| 0           | 0.000000848 | 0          |
| 0           | 0.00000161  | 0          |
| 0           | 0.000000833 | 0          |
| 0           | 0.00000675  | 0          |
| 0           | 0.00000642  | 0          |
| 0           | 0.000000885 | 0          |
| 0           | 0.00000808  | 0          |
| 0           | 0.0000128   | 0          |
| 0           | 0.00000695  | 0          |
| 0           | 0.00000286  | 0          |
| 0           | 0.000000159 | 0          |
| 0           | 3.53E-08    | 0          |
| 0           | 0.00000458  | 0          |
| 0           | 0.00000143  | 0          |
| 0.000000819 | 0           | 0.00000472 |
| 0           | 0.00000183  | 0          |
| 0           | 0.000000103 | 0          |
| 0           | 0.0000124   | 0          |
| 0.000000252 | 0.000000185 | 0          |
| 0           | 0.0000052   | 0          |
| 0           | 0.00000112  | 0          |
| 0           | 0.000000286 | 0          |
| 0.00000141  | 0           | 0          |
| 0           | 0.000000121 | 0          |

|             |             |             |
|-------------|-------------|-------------|
| 0           | 0.00000127  | 0           |
| 0           | 0           | 0           |
| 0           | 0.00000114  | 0           |
| 0           | 0.00000211  | 0           |
| 0           | 0.000000412 | 0           |
| 0           | 0.000000134 | 0           |
| 0           | 0.000000207 | 0           |
| 0           | 0.000000947 | 0           |
| 0           | 0.00000352  | 0           |
| 0           | 0.000000756 | 0           |
| 0           | 0.000000732 | 0           |
| 0           | 0.000000834 | 0           |
| 0           | 0           | 0.000000217 |
| 0           | 7.74E-08    | 0           |
| 0           | 0.000000235 | 0           |
| 0           | 3.15E-08    | 0           |
| 0           | 0           | 0           |
| 0           | 0.000000076 | 0           |
| 0           | 0.00000029  | 0           |
| 0           | 0.00000108  | 0           |
| 0           | 0.000000145 | 0           |
| 0           | 0.000000109 | 0           |
| 0           | 0           | 0.000000102 |
| 0           | 0.000000259 | 0           |
| 0           | 0.000000193 | 0           |
| 0           | 0.000000238 | 0           |
| 0           | 0.000000024 | 0           |
| 0           | 0           | 0           |
| 0           | 0.000000217 | 0           |
| 0           | 0.000000204 | 0           |
| 0           | 0.000000248 | 0           |
| 0.00000182  | 0.000000042 | 0           |
| 0.000000528 | 0           | 0           |
| 0           | 0.000000222 | 0           |
| 0           | 0.000000057 | 0           |
| 0           | 0.00000134  | 0           |
| 0           | 3.77E-08    | 0           |
| 0           | 0.000000907 | 0           |
| 0           | 0.000000401 | 0           |
| 0           | 0.000000211 | 0           |
| 0           | 0.00000464  | 0           |
| 0           | 0.000000824 | 0           |
| 0           | 0.000000981 | 0           |
| 0           | 0.000000575 | 0           |
| 0           | 0.000000695 | 0           |
| 0.000000479 | 0           | 0           |
| 0.00000212  | 0           | 0           |

|             |             |             |
|-------------|-------------|-------------|
| 0           | 0           | 0           |
| 0           | 0.000000445 | 0           |
| 0           | 0.00000154  | 0           |
| 0           | 0.00000012  | 0           |
| 0           | 0.000000482 | 0           |
| 0           | 0.000000098 | 0           |
| 0           | 0           | 0           |
| 0           | 0.00000089  | 0           |
| 0           | 0           | 0           |
| 0.000000076 | 0           | 0           |
| 0           | 0           | 0           |
| 0           | 0.000000278 | 0           |
| 0           | 0.000000202 | 0           |
| 0           | 0           | 0           |
| 0.00000117  | 0           | 0           |
| 0           | 7.34E-08    | 0           |
| 0           | 0           | 0.000000115 |
| 0           | 0           | 0           |
| 0           | 0.000000242 | 0           |
| 0           | 0.000000435 | 0           |
| 0.000000971 | 0           | 0           |
| 0           | 0           | 0.000000144 |
| 0           | 0           | 0           |
| 0           | 0           | 0.0000209   |
| 0           | 0.0000108   | 0           |
| 0.00000106  | 0           | 0           |
| 0           | 0.00000187  | 0           |
| 0           | 0.00000607  | 0           |
| 0           | 0.00000764  | 0           |
| 0           | 0           | 0           |
| 0           | 0           | 0           |
| 0.000000382 | 0           | 0           |
| 0           | 0.00000116  | 0           |
| 0           | 0.0000144   | 0           |
| 0           | 0.000000236 | 0           |
| 0           | 0           | 0           |
| 0           | 0           | 0           |
| 0           | 0.00000041  | 0           |
| 0           | 0.000000496 | 0           |
| 0           | 0.000000771 | 0           |
| 0           | 7.01E-08    | 0           |
| 0           | 0.000000309 | 0           |
| 0           | 0.0000017   | 0           |
| 0           | 0.00000271  | 0           |
| 0           | 0.00000174  | 0           |
| 0           | 0.00000295  | 0           |
| 0           | 0.00000137  | 0           |



|             |             |             |
|-------------|-------------|-------------|
| 0           | 0.00000136  | 0           |
| 0           | 0.0000017   | 0           |
| 0           | 0.0000017   | 0           |
| 0           | 0           | 0           |
| 0           | 0.00000121  | 0           |
| 0           | 0.000000307 | 0           |
| 0           | 0.000000543 | 0           |
| 0           | 0.00000548  | 0           |
| 0           | 0           | 0           |
| 0           | 0           | 0           |
| 0           | 0.000000591 | 0           |
| 0           | 0.000000749 | 0           |
| 0           | 0.00000237  | 0           |
| 0           | 0.00000162  | 0           |
| 0           | 0.00000115  | 0           |
| 0           | 0.00000122  | 0           |
| 0           | 0.00000149  | 0           |
| 0           | 0.00000146  | 0           |
| 0           | 0.000000642 | 0           |
| 0           | 0.00000105  | 0           |
| 0           | 0.0000131   | 0           |
| 0.000000176 | 0.000000161 | 0           |
| 0.00000148  | 0           | 0           |
| 0           | 0.000000174 | 0           |
| 0           | 0.000000308 | 0           |
| 0           | 0           | 0           |
| 0           | 0.000000676 | 0           |
| 0           | 0.00000134  | 0           |
| 0           | 0.000000868 | 0           |
| 0           | 0.000000733 | 0           |
| 0           | 0.000000458 | 0           |
| 0           | 0           | 0.000000306 |
| 0           | 0.000000322 | 0           |
| 0           | 0.00000135  | 0           |
| 0           | 0.000000081 | 0           |
| 0           | 0.000000263 | 0           |
| 0           | 0           | 0.0000113   |
| 0           | 0.000000189 | 0           |
| 0           | 0.00000141  | 0           |
| 0           | 0           | 0           |
| 0           | 0.00000148  | 0           |
| 0.00000151  | 0           | 0           |
| 0           | 0.000000487 | 0           |
| 0           | 0.000000106 | 0           |
| 0           | 0           | 0           |
| 0           | 0           | 0           |
| 0           | 0           | 0           |

|             |             |           |
|-------------|-------------|-----------|
| 0.00000122  | 0           | 0         |
| 0           | 0           | 0.0000145 |
| 0           | 0.000000123 | 0         |
| 0.00000064  | 0           | 0         |
| 0           | 0           | 0         |
| 0.000000652 | 0           | 0         |
| 0           | 0           | 0.0000145 |
| 0           | 0.000000122 | 0         |
| 0.000000235 | 0           | 0         |
| 0           | 0           | 0.0000147 |
| 0           | 0.00000396  | 0         |
| 0           | 0.00000624  | 0         |
| 0           | 0.00000245  | 0         |
| 0           | 0.00000144  | 0         |
| 0           | 0.00000104  | 0         |
| 0           | 0.00000157  | 0         |
| 0           | 0.00000168  | 0         |
| 0           | 0.000000389 | 0         |
| 0           | 0.000000721 | 0         |
| 4.24E-08    | 0.000000326 | 0         |
| 0           | 0.000000937 | 0         |
| 0           | 0.00000244  | 0         |
| 0           | 0.00000278  | 0         |
| 0           | 0.00000195  | 0         |
| 0           | 0.000000762 | 0         |
| 0           | 0.000000166 | 0         |
| 0           | 0.00000108  | 0         |
| 0           | 0.000000973 | 0         |
| 0           | 0.00000194  | 0         |
| 0           | 0.00000196  | 0         |
| 0           | 0.00000635  | 0         |
| 0           | 0.00000606  | 0         |
| 0           | 0.00000166  | 0         |
| 0           | 0.000012    | 0         |
| 0           | 0.00000394  | 0         |
| 0           | 0.00000114  | 0         |
| 0           | 0.00000519  | 0         |
| 0           | 0.00000048  | 0         |
| 0           | 0.00000337  | 0         |
| 0           | 0.00000193  | 0         |
| 0           | 2.43E-08    | 0         |
| 0           | 0.00000947  | 0         |
| 0           | 0.000000582 | 0         |
| 0           | 0.000000964 | 0         |
| 0           | 0.000000308 | 0         |
| 0.00000103  | 0           | 0         |
| 0           | 0.00000175  | 0         |

|             |             |             |
|-------------|-------------|-------------|
| 0           | 0.00000149  | 0           |
| 0           | 0.000000371 | 0           |
| 0           | 0.000000789 | 0           |
| 0           | 0.00000115  | 0           |
| 0           | 0.00000583  | 0           |
| 0           | 0.00000342  | 0           |
| 0           | 0           | 0.000000236 |
| 0.00000346  | 0           | 0.000000515 |
| 0           | 0           | 0.000000144 |
| 0           | 7.28E-08    | 0           |
| 0           | 0.00000307  | 0           |
| 0           | 0           | 0.0000154   |
| 0           | 0.00000273  | 0           |
| 0.000000797 | 0           | 0.0000301   |
| 0           | 0.000000563 | 0           |
| 0           | 0.00000144  | 0           |
| 0           | 0.000000048 | 0           |
| 0           | 0.000000663 | 0           |
| 0           | 0.000000144 | 0           |
| 0           | 0.000000975 | 0           |
| 0           | 0.000000981 | 0           |
| 0           | 0.000000725 | 0           |
| 0           | 0.00000135  | 0           |
| 0           | 0           | 0           |
| 0           | 0.000000239 | 0           |
| 0           | 0.00000809  | 0           |
| 0           | 7.34E-08    | 0           |
| 0           | 0.00000921  | 0           |
| 0           | 0           | 0           |
| 0           | 0           | 0           |
| 0.000000151 | 0           | 0           |
| 0           | 0.00000526  | 0           |
| 0           | 0.00000629  | 0           |
| 0           | 0.0000139   | 0           |
| 0           | 0.00000128  | 0           |
| 0           | 0.00000136  | 0           |
| 0           | 7.79E-08    | 0           |
| 0           | 0.00000074  | 0           |
| 0           | 0.00000129  | 0           |
| 0           | 0.000000558 | 0           |
| 0           | 0.00000018  | 0           |
| 0           | 0.000000769 | 0           |
| 0           | 0.00000214  | 0           |
| 0           | 0.00000159  | 0           |
| 0           | 0.00000112  | 0           |
| 0           | 0.00000111  | 0           |
| 0           | 0.000000517 | 0           |

|             |             |             |
|-------------|-------------|-------------|
| 0           | 0.000000955 | 0           |
| 0           | 0.000000749 | 0           |
| 0           | 0.00000121  | 0           |
| 0           | 0.000000634 | 0           |
| 0           | 0.000000759 | 0           |
| 0           | 0.000000696 | 0           |
| 0           | 0.000000616 | 0           |
| 0           | 0.000000995 | 0           |
| 0           | 0.000000398 | 0           |
| 0           | 0.000000961 | 0           |
| 0           | 0.0000101   | 0           |
| 0           | 0.000000501 | 0           |
| 0           | 0.000000213 | 0           |
| 0           | 0.0000002   | 0           |
| 0           | 0.0000115   | 0           |
| 0           | 0.000000279 | 0           |
| 0.000000777 | 0           | 0           |
| 0           | 0.00000183  | 0           |
| 0           | 0.00000015  | 0           |
| 0           | 5.77E-08    | 0           |
| 0           | 0.000000576 | 0           |
| 0           | 0.00000159  | 0           |
| 0           | 0.000000504 | 0           |
| 0           | 0           | 0.000000218 |
| 0           | 0.000000436 | 0           |
| 0           | 0.000000671 | 0           |
| 0           | 0           | 0.0000139   |
| 0           | 0.00000013  | 0           |
| 0           | 0.000000591 | 0           |
| 0           | 0.000000119 | 0           |
| 0           | 0.000000886 | 0           |
| 0           | 0.000000543 | 0           |
| 0           | 0.000000339 | 0           |
| 0           | 0.000000481 | 0           |
| 0           | 0           | 0           |
| 0           | 9.58E-08    | 0           |
| 0           | 0.000000528 | 0           |
| 0           | 0           | 0           |
| 0           | 0           | 0           |
| 6.43E-08    | 0           | 0           |
| 0.000000957 | 0           | 0           |
| 0           | 0           | 0.000000244 |
| 0           | 0           | 0.0000134   |
| 0           | 0           | 0           |
| 0           | 0.000000653 | 0           |
| 0           | 0.000000192 | 0           |
| 0           | 0.000000315 | 0           |

|             |             |             |
|-------------|-------------|-------------|
| 0           | 0.00000394  | 0           |
| 0           | 0           | 0           |
| 0.00000109  | 0           | 0.00000432  |
| 0           | 0.00000889  | 0           |
| 0.000000358 | 0.00000037  | 0           |
| 0           | 0.0000153   | 0           |
| 0           | 0.000000329 | 0           |
| 0           | 0.000000162 | 0           |
| 0           | 5.02E-08    | 0           |
| 0           | 0.000000258 | 0           |
| 0           | 0.000000103 | 0           |
| 0           | 9.62E-08    | 0           |
| 0           | 0.000000221 | 0           |
| 0           | 8.16E-08    | 0           |
| 0           | 0.0000026   | 0           |
| 0           | 0           | 0           |
| 0           | 0.00000238  | 0           |
| 0           | 4.95E-08    | 0           |
| 0           | 0.000000957 | 0           |
| 0           | 0.00000513  | 0           |
| 0           | 0.000000746 | 0           |
| 0           | 0.00000421  | 0           |
| 0           | 0.00000156  | 0           |
| 0           | 0.00000728  | 0           |
| 0           | 0.000000182 | 0           |
| 0           | 0           | 0.00000102  |
| 0           | 0.000000319 | 0           |
| 0           | 0.000000471 | 0           |
| 0           | 0.000000315 | 0           |
| 0           | 0           | 0           |
| 0           | 0.00000391  | 0           |
| 0           | 6.81E-08    | 0           |
| 0           | 0.000000261 | 0           |
| 0           | 0.00000187  | 0           |
| 0           | 0.00000239  | 0           |
| 0           | 0.000000157 | 0           |
| 0           | 0.0000121   | 0           |
| 0           | 0.000000138 | 0           |
| 0           | 0           | 0           |
| 0           | 0.00000151  | 0           |
| 0           | 0           | 0           |
| 0           | 0           | 0           |
| 0.00000118  | 0           | 0           |
| 0           | 0           | 0.000000323 |
| 0           | 0           | 0.0000153   |
| 0.000000146 | 0           | 0           |
| 0           | 0           | 0           |

|             |             |             |
|-------------|-------------|-------------|
| 0           | 0           | 8.14E-08    |
| 0           | 0           | 8.14E-08    |
| 0           | 0           | 0           |
| 0           | 0           | 0.0000112   |
| 0           | 0           | 0.00000347  |
| 0           | 0           | 0.0000128   |
| 0           | 0           | 0.00000138  |
| 0           | 2.63E-08    | 0           |
| 0.00000117  | 0           | 0           |
| 0           | 0           | 0.0000242   |
| 0           | 0.000000155 | 0           |
| 0           | 0           | 0.0000163   |
| 0.00000133  | 0           | 0           |
| 0           | 0.000000121 | 0           |
| 0           | 0.00000161  | 0           |
| 0           | 0.000000633 | 0           |
| 0           | 0.00000115  | 0           |
| 0           | 0.000000285 | 0           |
| 0           | 0.000000828 | 0           |
| 0           | 5.72E-08    | 0           |
| 0           | 0           | 0.000015    |
| 0           | 0.00000156  | 0           |
| 0           | 0           | 0           |
| 0           | 6.89E-08    | 0           |
| 0           | 0.000000146 | 0           |
| 0           | 0           | 3.41E-08    |
| 0           | 0           | 0           |
| 0.00000143  | 0           | 0           |
| 0.000000392 | 0           | 0           |
| 0           | 0           | 0           |
| 0.00000185  | 0           | 0           |
| 0           | 0           | 0           |
| 0           | 0           | 0.0000276   |
| 0           | 0           | 0.000000781 |
| 0           | 0           | 5.77E-08    |
| 0           | 0           | 5.16E-08    |
| 0           | 0.0000069   | 0           |
| 0           | 0.000000302 | 0           |
| 0           | 0.000000707 | 0           |
| 0           | 0           | 0           |
| 0           | 0.00000183  | 0           |
| 0           | 6.01E-08    | 0           |
| 0           | 0.000000733 | 0           |
| 0           | 0.000000859 | 0           |
| 0           | 0.00000119  | 0           |
| 0           | 0.000000835 | 0           |
| 0           | 0.00000208  | 0           |

|            |             |             |
|------------|-------------|-------------|
| 0          | 3.38E-08    | 0           |
| 0          | 0.000000729 | 0           |
| 0          | 0.00000065  | 0           |
| 0          | 0.00000106  | 0           |
| 0          | 0.000000837 | 0           |
| 0          | 0.00000046  | 0           |
| 0          | 0.00000135  | 0           |
| 0          | 0.00000289  | 0           |
| 0          | 0.00000153  | 0           |
| 0          | 0.000000103 | 0           |
| 0          | 0.0000117   | 0           |
| 9.21E-08   | 0.000000293 | 0           |
| 0          | 0.000013    | 0           |
| 0          | 0.00000102  | 0           |
| 0          | 0.000000342 | 0           |
| 0          | 0.000000086 | 0           |
| 0.00000198 | 0           | 0           |
| 0          | 7.62E-08    | 0           |
| 0          | 0.000000125 | 0           |
| 0          | 0.000000363 | 0           |
| 0          | 0.000000181 | 0           |
| 0          | 6.91E-08    | 0           |
| 0          | 6.05E-08    | 0           |
| 0          | 0.000000135 | 0           |
| 0          | 0.00000133  | 0           |
| 0          | 0.00000177  | 0           |
| 0          | 0.000000149 | 0           |
| 0          | 0.000000255 | 0           |
| 0          | 0.00000205  | 0           |
| 0          | 0.00000219  | 0           |
| 0          | 0.00000398  | 0           |
| 0          | 0.0000034   | 0           |
| 0          | 0.000000938 | 0           |
| 0          | 0.000000855 | 0           |
| 0          | 0           | 0.000000406 |
| 0          | 0.00000013  | 0           |
| 0          | 0.000000515 | 0           |
| 0          | 2.76E-08    | 0           |
| 0          | 0           | 0           |
| 0          | 0.000000177 | 0           |
| 0          | 0.00000375  | 0           |
| 0          | 0.00000334  | 0           |
| 0          | 0.00000125  | 0           |
| 0          | 0.0000061   | 0           |
| 0          | 0.000000142 | 0           |
| 0          | 0.000000114 | 0           |
| 0          | 0           | 0           |

|            |            |            |
|------------|------------|------------|
| 0          | 0          | 0.0000194  |
| 0          | 0.00000311 | 0          |
| 0          | 0.00000155 | 0          |
| 0          | 0.00000332 | 0          |
| 0          | 0.00000298 | 0          |
| 0          | 0          | 0          |
| 0          | 0.00000352 | 0          |
| 0          | 0.00000633 | 0          |
| 0          | 0.00000161 | 0          |
| 0          | 9.49E-08   | 0          |
| 0          | 0.00000885 | 0          |
| 0          | 0.00000422 | 0          |
| 0          | 0.00000221 | 0          |
| 0          | 0.00000567 | 0          |
| 0          | 0.00000856 | 0          |
| 0          | 0.00000691 | 0          |
| 0          | 0.00000646 | 0          |
| 0          | 4.32E-08   | 0          |
| 0          | 0.00000952 | 0          |
| 0          | 0          | 0          |
| 0          | 0.00000491 | 0          |
| 0          | 0.00000186 | 0          |
| 0          | 0.00000799 | 0          |
| 0          | 0.0000163  | 0          |
| 0          | 0.00000216 | 0          |
| 0          | 8.24E-08   | 0          |
| 0          | 0          | 0          |
| 0          | 0          | 0          |
| 0          | 0.00000545 | 0          |
| 0          | 0          | 0          |
| 6.46E-08   | 0          | 0          |
| 0          | 0          | 0          |
| 0          | 0          | 0          |
| 0          | 0.0000013  | 0          |
| 0.00000133 | 0          | 0          |
| 0          | 0.00000445 | 0          |
| 0          | 0          | 0.00000786 |
| 0          | 0.00000977 | 0          |
| 0          | 0          | 0          |
| 0          | 0          | 0          |
| 0          | 0          | 0.00000909 |
| 0          | 0          | 0          |
| 0          | 0.00000397 | 0          |
| 0          | 0.00000524 | 0          |
| 0          | 0.00000114 | 0          |
| 0          | 0.00000115 | 0          |
| 0.00000101 | 0          | 0          |



|             |             |             |
|-------------|-------------|-------------|
| 0           | 0.000000454 | 0           |
| 0           | 0.000000148 | 0           |
| 0           | 0.000000411 | 0           |
| 0           | 0.000000609 | 0           |
| 0           | 0.000000724 | 0           |
| 0           | 0.000000773 | 0           |
| 0           | 2.99E-08    | 0           |
| 0           | 0           | 0.0000109   |
| 0           | 0           | 0           |
| 0.000000107 | 0.000000713 | 0           |
| 0           | 0.000000925 | 0           |
| 0.000000306 | 0           | 0           |
| 0           | 0.000000509 | 0           |
| 0           | 0.000000106 | 0           |
| 0           | 0.000000464 | 0           |
| 0           | 0           | 0           |
| 0           | 0           | 0           |
| 0           | 0           | 0           |
| 0           | 0.000000174 | 0           |
| 0           | 0.000000266 | 0           |
| 0.000000154 | 0           | 0           |
| 0           | 0           | 0.000000103 |
| 0.000000436 | 0           | 0.00000006  |
| 0           | 0           | 0.000000284 |
| 0           | 0.000000061 | 0           |
| 0           | 0           | 0           |
| 0           | 0.000000334 | 0           |
| 0           | 0           | 0.000000583 |
| 0           | 0           | 0           |
| 0           | 0           | 0           |
| 0           | 0.000000388 | 0           |
| 0           | 0.000000688 | 0           |
| 0           | 0.000000102 | 0           |
| 0           | 0.000000112 | 0           |
| 0           | 0.000000044 | 0           |
| 0           | 0.000000799 | 0           |
| 0.000000975 | 0           | 0           |
| 0           | 0           | 0           |
| 0           | 0.000000057 | 0           |
| 0           | 0.000000176 | 0           |
| 0           | 0.000000113 | 0           |
| 0           | 0.00000005  | 0           |
| 0           | 0.000000363 | 0           |
| 0           | 0           | 0.000000279 |
| 0           | 0.000000119 | 0           |
| 0           | 0.000000521 | 0           |
| 0           | 0.000000639 | 0           |

|             |             |           |
|-------------|-------------|-----------|
| 0           | 0           | 0.0000104 |
| 0           | 0           | 0         |
| 0.000000127 | 0.000000507 | 0         |
| 0.000000124 | 0           | 0         |
| 0           | 0.00000116  | 0         |
| 0.0000032   | 0           | 0         |
| 0           | 0.000000444 | 0         |
| 0           | 0.000000071 | 0         |
| 0           | 0.00000614  | 0         |
| 0           | 0.000000389 | 0         |
| 0           | 0           | 0         |
| 0           | 0           | 0         |
| 0           | 0           | 0         |
| 0           | 0.000000046 | 0         |
| 0           | 0.00000534  | 0         |
| 0           | 0.00000992  | 0         |
| 0           | 0.00000174  | 0         |
| 0           | 0.000000469 | 0         |
| 0           | 0.00000759  | 0         |
| 0           | 0.0000252   | 0         |
| 0           | 0.00000049  | 0         |
| 0           | 0.0000066   | 0         |
| 0           | 0.00000265  | 0         |
| 0           | 0           | 0         |
| 0           | 0.00000341  | 0         |
| 0           | 0           | 0         |
| 0           | 0.00000207  | 0         |
| 0           | 0.000000123 | 0         |
| 0           | 0.00000126  | 0         |
| 0           | 0.000000919 | 0         |
| 0           | 0.00000179  | 0         |
| 0           | 0.000000748 | 0         |
| 0           | 0.000000945 | 0         |
| 0           | 0.00000177  | 0         |
| 0           | 0.00000127  | 0         |
| 0           | 0.00000376  | 0         |
| 0           | 0.00000267  | 0         |
| 0           | 7.33E-08    | 0         |
| 0           | 0.00000261  | 0         |
| 0           | 0.00000136  | 0         |
| 0           | 0.00000149  | 0         |
| 0           | 0.00000164  | 0         |
| 0           | 0.000000884 | 0         |
| 0           | 0.00000155  | 0         |
| 0           | 0.00000117  | 0         |
| 0           | 0.00000736  | 0         |
| 0           | 0.0000071   | 0         |

|             |             |             |
|-------------|-------------|-------------|
| 0           | 0.0000015   | 0           |
| 0           | 0.00000886  | 0           |
| 0           | 0.00000528  | 0           |
| 0           | 0.000000829 | 0           |
| 0           | 0.0000187   | 0           |
| 0           | 0.00000116  | 0           |
| 0           | 0.0000032   | 0           |
| 0           | 0.000000635 | 0           |
| 0           | 6.96E-08    | 0           |
| 0           | 0.00000416  | 0           |
| 0           | 0.00000134  | 0           |
| 0.00000111  | 0           | 0.00000514  |
| 0           | 0.00000379  | 0           |
| 0           | 0.00000246  | 0           |
| 0           | 0.000000175 | 0           |
| 0           | 0.0000142   | 0           |
| 0.000000274 | 0.000000404 | 0           |
| 0           | 0.0000149   | 0           |
| 0           | 0.00000111  | 0           |
| 0           | 0.000000275 | 0           |
| 0           | 0.000000139 | 0           |
| 0.00000128  | 0           | 0           |
| 0           | 0.000000178 | 0           |
| 0           | 7.78E-08    | 0           |
| 0           | 0.000000206 | 0           |
| 0           | 4.37E-08    | 0           |
| 0           | 0.000000101 | 0           |
| 0           | 0.000000227 | 0           |
| 0           | 0.000000167 | 0           |
| 0           | 0.00000127  | 0           |
| 0           | 0           | 0           |
| 0           | 0.00000201  | 0           |
| 0           | 0.00000263  | 0           |
| 0           | 5.75E-08    | 0           |
| 0           | 0.000000719 | 0           |
| 0           | 0.000000162 | 0           |
| 0           | 0.000000281 | 0           |
| 0           | 0.00000127  | 0           |
| 0           | 0.00000346  | 0           |
| 0           | 0.00000507  | 0           |
| 0           | 0.00000541  | 0           |
| 0           | 0.00000366  | 0           |
| 0           | 0.00000114  | 0           |
| 0           | 0.00000077  | 0           |
| 0           | 0.000000731 | 0           |
| 0           | 0           | 0.000000373 |
| 0           | 5.14E-08    | 0           |

|             |             |             |
|-------------|-------------|-------------|
| 0.00000528  | 0           | 0.000000404 |
| 0           | 0           | 0.000000346 |
| 0           | 0.000000401 | 0           |
| 0           | 0.00000032  | 0           |
| 0           | 8.07E-08    | 0           |
| 0           | 0           | 0           |
| 0           | 0.00000186  | 0           |
| 0           | 8.66E-08    | 0           |
| 0           | 0.00000432  | 0           |
| 0           | 0.00000374  | 0           |
| 0           | 0.00000115  | 0           |
| 0           | 0.00000723  | 0           |
| 0           | 0.000000222 | 0           |
| 0           | 0.000000311 | 0           |
| 0           | 0           | 0.00000115  |
| 0           | 0           | 0           |
| 0           | 0.00000113  | 0           |
| 0           | 0.000000275 | 0           |
| 0           | 0           | 0.0000117   |
| 0           | 0.00000033  | 0           |
| 0           | 0.000000288 | 0           |
| 0           | 0.000000282 | 0           |
| 0           | 0.000000314 | 0           |
| 0           | 0           | 0           |
| 0           | 0.00000357  | 0           |
| 0           | 0.000000239 | 0           |
| 0           | 0.000000282 | 0           |
| 0           | 0           | 0           |
| 0.000000474 | 0           | 0           |
| 0           | 0           | 0.000105012 |
| 0.000000277 | 0           | 0           |
| 0           | 3.64E-08    | 0           |
| 0.000000206 | 0           | 0           |
| 0           | 0.000000846 | 0           |
| 0           | 0.0000012   | 0           |
| 0           | 0.000000128 | 0           |
| 0           | 0.000000995 | 0           |
| 0           | 0.000000423 | 0           |
| 0           | 0.00000031  | 0           |
| 0           | 0.00000698  | 0           |
| 0           | 0.00000104  | 0           |
| 0           | 0.00000101  | 0           |
| 0           | 0.000000354 | 0           |
| 0           | 6.22E-08    | 0           |
| 0           | 0.00000128  | 0           |
| 0.0000012   | 0           | 0           |
| 0.00000286  | 0           | 0           |

|            |             |            |
|------------|-------------|------------|
| 0          | 0           | 0          |
| 0          | 0.000000474 | 0          |
| 0          | 0.00000774  | 0          |
| 0          | 0.000000134 | 0          |
| 0          | 0.0000019   | 0          |
| 0          | 0.00000123  | 0          |
| 0          | 0.000000269 | 0          |
| 0          | 0.000000724 | 0          |
| 0          | 0.000000787 | 0          |
| 0          | 0.0000168   | 0          |
| 0          | 0.00000102  | 0          |
| 0          | 0.000000883 | 0          |
| 0          | 0           | 0          |
| 0          | 4.31E-08    | 0          |
| 0          | 0           | 0          |
| 0          | 0           | 0          |
| 0          | 0.000000942 | 0          |
| 0          | 0           | 0          |
| 0.00000028 | 0           | 0          |
| 0          | 0           | 0          |
| 0          | 0.00000194  | 0          |
| 0          | 0.000000651 | 0          |
| 0          | 0.000000979 | 0          |
| 0          | 0.00000536  | 0          |
| 0          | 0.00000558  | 0          |
| 0          | 0.000000976 | 0          |
| 0          | 0.00000168  | 0          |
| 0.00000154 | 0           | 0          |
| 0          | 2.06E-08    | 0          |
| 0          | 0.000000257 | 0          |
| 0          | 0           | 0          |
| 0          | 0.00000052  | 0          |
| 0          | 0.000000157 | 0          |
| 0          | 0.000000337 | 0          |
| 0          | 0.000000412 | 0          |
| 0          | 0.000000797 | 0          |
| 0          | 0.000000441 | 0          |
| 0          | 0.000000366 | 0          |
| 0          | 0           | 0.00000592 |
| 0          | 0.000000116 | 0          |
| 0          | 0.00000149  | 0          |
| 0          | 0.000000561 | 0          |
| 0          | 0           | 0          |
| 0          | 0           | 0          |
| 0          | 0           | 0          |
| 0          | 0           | 0          |
| 0.00000036 | 0           | 0          |

|             |             |            |
|-------------|-------------|------------|
| 0           | 0           | 0          |
| 0           | 0.00000467  | 0          |
| 0           | 0.00000853  | 0          |
| 0           | 0.00000163  | 0          |
| 0           | 0.000000191 | 0          |
| 0           | 0.00000733  | 0          |
| 0           | 0.0000225   | 0          |
| 0           | 0.000000643 | 0          |
| 0           | 0.00000704  | 0          |
| 0           | 0.00000225  | 0          |
| 0           | 0           | 0          |
| 0           | 0           | 0          |
| 0           | 0.00000194  | 0          |
| 0           | 0.000000116 | 0          |
| 0           | 0.000000722 | 0          |
| 0           | 0.000000754 | 0          |
| 0           | 0.000000719 | 0          |
| 0           | 0.00000097  | 0          |
| 0           | 0.00000079  | 0          |
| 0           | 0.00000249  | 0          |
| 0           | 0.00000216  | 0          |
| 0           | 8.43E-08    | 0          |
| 0           | 0.00000213  | 0          |
| 0           | 0.00000102  | 0          |
| 0           | 0.000000592 | 0          |
| 0           | 0.00000207  | 0          |
| 0           | 0.00000115  | 0          |
| 0           | 0.00000119  | 0          |
| 0           | 0.000000681 | 0          |
| 0           | 0.00000731  | 0          |
| 0           | 0.00000074  | 0          |
| 0           | 0.000000766 | 0          |
| 0           | 0.000000897 | 0          |
| 0           | 0.000000977 | 0          |
| 0           | 0.00000242  | 0          |
| 0           | 9.72E-08    | 0          |
| 0           | 0.000000028 | 0          |
| 0           | 0.00000355  | 0          |
| 0.00000104  | 0           | 0.00000564 |
| 0           | 0.0000025   | 0          |
| 0           | 0.00000188  | 0          |
| 0           | 0.000000112 | 0          |
| 0           | 0.0000124   | 0          |
| 0.000000164 | 0.000000204 | 0          |
| 0           | 0.0000103   | 0          |
| 0           | 0.000000607 | 0          |
| 0           | 0.00000117  | 0          |

|             |             |             |
|-------------|-------------|-------------|
| 0           | 0.000000287 | 0           |
| 0.00000113  | 0           | 0           |
| 0           | 0.000000111 | 0           |
| 0           | 6.75E-08    | 0           |
| 0           | 8.98E-08    | 0           |
| 0           | 3.36E-08    | 0           |
| 0           | 0.00000016  | 0           |
| 0           | 0.000000111 | 0           |
| 0           | 0.00000107  | 0           |
| 0           | 0           | 0           |
| 0           | 3.74E-08    | 0           |
| 0           | 7.18E-08    | 0           |
| 0           | 0.000000186 | 0           |
| 0           | 0.00000129  | 0           |
| 0           | 0.000000969 | 0           |
| 0           | 0.00000393  | 0           |
| 0           | 0.000000775 | 0           |
| 0           | 0.000000664 | 0           |
| 0           | 0.00000079  | 0           |
| 0           | 0           | 0.00000053  |
| 0           | 0.000000126 | 0           |
| 0.0000043   | 0           | 0.000000692 |
| 0           | 0           | 0.000000363 |
| 0           | 0.00000347  | 0           |
| 0           | 0.00000341  | 0           |
| 0           | 0.00000109  | 0           |
| 0           | 0.00000502  | 0           |
| 0           | 4.75E-08    | 0           |
| 0           | 0           | 0           |
| 0           | 0.00000017  | 0           |
| 0           | 0           | 0.0000159   |
| 0           | 0.000000202 | 0           |
| 0           | 0.000000242 | 0           |
| 0           | 0.000000171 | 0           |
| 0           | 0.000000261 | 0           |
| 0           | 0           | 0           |
| 0           | 0.000000101 | 0           |
| 0           | 0.000000204 | 0           |
| 0           | 0           | 0           |
| 0           | 4.11E-08    | 0           |
| 0           | 0.000000233 | 0           |
| 0.000000115 | 0.000000907 | 0           |
| 0.000000114 | 0           | 0           |
| 0           | 0.000000552 | 0           |
| 0           | 0.00000112  | 0           |
| 0           | 6.62E-08    | 0           |
| 0           | 0.00000103  | 0           |

|            |             |             |
|------------|-------------|-------------|
| 0          | 0.000000572 | 0           |
| 0          | 0.000000284 | 0           |
| 0          | 0.00000109  | 0           |
| 0          | 0.00000145  | 0           |
| 0          | 0.000000492 | 0           |
| 0          | 0.00000107  | 0           |
| 0.00000048 | 0           | 0           |
| 0.000003   | 0           | 0           |
| 0          | 0           | 0           |
| 0          | 0.000000523 | 0           |
| 0          | 0.000000706 | 0           |
| 0          | 0.000000145 | 0           |
| 0          | 0.000000123 | 0           |
| 0          | 0           | 5.22E-08    |
| 0          | 0.000000146 | 0           |
| 0          | 0.000000347 | 0           |
| 0          | 0.000000045 | 0           |
| 0          | 0.000000669 | 0           |
| 0          | 0           | 0           |
| 0          | 8.82E-08    | 0           |
| 0          | 0           | 0           |
| 0          | 0           | 0           |
| 0.0000002  | 0           | 0           |
| 0          | 0           | 0           |
| 0          | 0.00000194  | 0           |
| 0          | 0.000000651 | 0           |
| 0          | 0.000000979 | 0           |
| 0          | 0.000000536 | 0           |
| 0          | 0.000000558 | 0           |
| 0          | 0.000000976 | 0           |
| 0          | 0.000000168 | 0           |
| 0.00000154 | 0           | 0           |
| 0          | 2.06E-08    | 0           |
| 0          | 0.000000257 | 0           |
| 0          | 0           | 0           |
| 0          | 0.000000052 | 0           |
| 0          | 0.000000157 | 0           |
| 0          | 0.000000337 | 0           |
| 0          | 0.000000412 | 0           |
| 0          | 0.000000797 | 0           |
| 0          | 0.000000441 | 0           |
| 0          | 0.000000366 | 0           |
| 0          | 0           | 0.000000592 |
| 0          | 0.000000116 | 0           |
| 0          | 0.000000149 | 0           |
| 0          | 0.000000561 | 0           |
| 0          | 0           | 0           |



|             |             |             |
|-------------|-------------|-------------|
| 0           | 0           | 0           |
| 0           | 0           | 0           |
| 0           | 0           | 0           |
| 0.00000036  | 0           | 0           |
| 0           | 0           | 0           |
| 0           | 0.0000071   | 0           |
| 0           | 0.000002    | 0           |
| 0           | 0.000000703 | 0           |
| 0           | 0.000000974 | 0           |
| 0           | 0.000000761 | 0           |
| 0           | 0.000000951 | 0           |
| 0           | 0.000000768 | 0           |
| 0           | 0.00000665  | 0           |
| 0           | 0.00000679  | 0           |
| 0           | 0.000000837 | 0           |
| 0           | 0.00000127  | 0           |
| 0           | 0.00000132  | 0           |
| 0.00000128  | 0           | 0           |
| 0           | 0           | 0           |
| 0           | 8.79E-08    | 0           |
| 0           | 0.00000346  | 0           |
| 0           | 0.000000589 | 0           |
| 0           | 0.000000633 | 0           |
| 0           | 0.000000797 | 0           |
| 0           | 0           | 0.000000502 |
| 0           | 0           | 0.0000144   |
| 0           | 7.84E-08    | 0           |
| 0           | 0.000000059 | 0           |
| 0           | 0.000000325 | 0           |
| 0           | 0.000000171 | 0           |
| 0           | 0.000000988 | 0           |
| 0           | 0.000000093 | 0           |
| 0           | 0.00000122  | 0           |
| 0.00000293  | 0           | 0           |
| 0           | 0.000000117 | 0           |
| 0           | 0.000000614 | 0           |
| 0           | 0           | 0           |
| 0           | 0           | 0           |
| 0.000000239 | 0           | 0           |
| 0           | 0.00000181  | 0           |
| 0           | 0.000000814 | 0           |
| 0           | 0.00000009  | 0           |
| 0           | 0.00000067  | 0           |
| 0           | 0.000000672 | 0           |
| 0           | 0.00000111  | 0           |
| 0.0000012   | 0           | 0           |
| 0           | 3.89E-08    | 0           |

|             |             |             |
|-------------|-------------|-------------|
| 0           | 0.000000216 | 0           |
| 0           | 0           | 0           |
| 0           | 0.000000546 | 0           |
| 0           | 0.000000149 | 0           |
| 0           | 0.000000659 | 0           |
| 0           | 0.000000419 | 0           |
| 0           | 0.000000451 | 0           |
| 0           | 0.00000174  | 0           |
| 0           | 0.000000253 | 0           |
| 0           | 0           | 0.00000928  |
| 0           | 0.000000102 | 0           |
| 0           | 0.000000684 | 0           |
| 0           | 0           | 0           |
| 0           | 0           | 0           |
| 0           | 0           | 0           |
| 0.000000225 | 0           | 0           |
| 0.000000989 | 0           | 0           |
| 0           | 0.000000962 | 0           |
| 0           | 0           | 0.000000147 |
| 0           | 0           | 0           |
| 0.0000179   | 0           | 0           |
| 0           | 8.82E-08    | 0           |
| 0           | 0           | 0           |
| 0           | 0.0000219   | 0           |
| 0           | 0           | 0           |
| 0           | 0.00000514  | 0           |
| 0           | 0           | 0.0000184   |
| 0           | 0.00000236  | 0           |
| 0           | 0.000019    | 0           |
| 0.000000935 | 0           | 0           |
| 0           | 0.000000185 | 0           |
| 0           | 0           | 0           |
| 0.00000153  | 0           | 0           |
| 0           | 0.00000109  | 0           |
| 0           | 0.00000111  | 0           |
| 0.000000406 | 0           | 0           |
| 0.000000726 | 0           | 0.0000276   |
| 0           | 6.31E-08    | 0           |
| 0           | 0.000000437 | 0           |
| 0           | 0           | 4.56E-08    |
| 0.000000927 | 0           | 0           |
| 0           | 0           | 0           |
| 0           | 0           | 0.000000107 |
| 0.000000409 | 0           | 0           |
| 0           | 0.000000248 | 0           |
| 0           | 0.00000258  | 0           |
| 0           | 0.00000121  | 0           |

|             |             |             |
|-------------|-------------|-------------|
| 0           | 0.000000342 | 0           |
| 0           | 0.00000127  | 0           |
| 0           | 0.00000101  | 0           |
| 0           | 0.000000449 | 0           |
| 0.000000858 | 0           | 0           |
| 8.99E-08    | 0           | 0           |
| 0.000000399 | 0           | 0           |
| 0           | 0           | 0           |
| 0           | 0.000000034 | 0           |
| 0.00000179  | 0           | 0           |
| 0           | 0           | 0           |
| 0           | 0.00000279  | 0           |
| 0           | 0.000000992 | 0           |
| 0           | 0.000000589 | 0           |
| 0           | 0.000000792 | 0           |
| 0           | 0.000000497 | 0           |
| 0           | 0.000000708 | 0           |
| 0.00000156  | 0           | 0.00000305  |
| 0           | 0           | 0.000000524 |
| 0           | 0           | 0           |
| 0           | 0           | 0           |
| 0           | 4.01E-08    | 0           |
| 0           | 0.00000416  | 0           |
| 0.00000106  | 0           | 0           |
| 0           | 0.000000249 | 0           |
| 0           | 0.00000138  | 0           |
| 0.00000405  | 0           | 0.000000616 |
| 0           | 0.000000381 | 0           |
| 0           | 0.000000548 | 0           |
| 0           | 0.00000492  | 0           |
| 0           | 0           | 0.000000563 |
| 0           | 0           | 0.0000246   |
| 0           | 0.00000188  | 0           |
| 0.000000136 | 0           | 0           |
| 0.00000336  | 0           | 0           |
| 0           | 0.000000527 | 0           |
| 0           | 0.000000153 | 0           |
| 0           | 0.00000174  | 0           |
| 0           | 0.00000158  | 0           |
| 0           | 0.0000173   | 0           |
| 0           | 0           | 0           |
| 0           | 0.0000101   | 0           |
| 0           | 0.00000169  | 0           |
| 0           | 0.00000276  | 0           |
| 0           | 0.000000463 | 0           |
| 0           | 0.000000592 | 0           |
| 0           | 0.000000342 | 0           |

|             |             |             |
|-------------|-------------|-------------|
| 0           | 0.000000606 | 0           |
| 0.00000156  | 0           | 0           |
| 0           | 0.000000159 | 0           |
| 0           | 0.000000326 | 0           |
| 0.00000011  | 0           | 0           |
| 0           | 0           | 0           |
| 0           | 0           | 0.0000173   |
| 0           | 0.000000988 | 0           |
| 0           | 0.000000608 | 0           |
| 0           | 0.00000104  | 0           |
| 0           | 0.000000929 | 0           |
| 0           | 0.00000396  | 0           |
| 0           | 0.000000221 | 0           |
| 0           | 5.34E-08    | 0           |
| 0           | 0.00000118  | 0           |
| 0           | 0.000000629 | 0           |
| 0           | 0           | 0           |
| 0.00000016  | 0           | 0           |
| 0           | 0           | 0           |
| 0           | 0.000000104 | 0           |
| 0.00000145  | 0           | 0           |
| 0           | 0           | 0           |
| 0           | 0.00000236  | 0           |
| 0           | 0.00000176  | 0           |
| 0           | 0.00000577  | 0           |
| 0           | 0.00000509  | 0           |
| 0           | 0.0000217   | 0           |
| 0           | 0           | 0.00000072  |
| 0           | 0           | 0.000000515 |
| 0           | 0.00000237  | 0           |
| 0           | 0.000000771 | 0           |
| 0           | 0.000000585 | 0           |
| 0           | 0.000000786 | 0           |
| 0           | 0.00000119  | 0           |
| 0           | 0.00000057  | 0           |
| 0.000000531 | 0           | 0           |
| 0.000000512 | 0           | 0           |
| 0           | 0           | 0.00000186  |
| 0           | 0.000000368 | 0           |
| 0           | 0.00000104  | 0           |
| 0           | 0.00000066  | 0           |
| 0           | 0.00000104  | 0           |
| 0           | 0.00000308  | 0           |
| 0           | 3.12E-08    | 0           |
| 0           | 0.00000136  | 0           |
| 0           | 0.000000798 | 0           |
| 0           | 0.00000107  | 0           |

|             |             |             |
|-------------|-------------|-------------|
| 0           | 0.00000125  | 0           |
| 0           | 0.00000126  | 0           |
| 0           | 0.00000351  | 0           |
| 0           | 0.000000654 | 0           |
| 0           | 0.000000815 | 0           |
| 0.00000104  | 0           | 0           |
| 0           | 0           | 0.000000326 |
| 0           | 0           | 0.0000431   |
| 0           | 0.00000024  | 0           |
| 0           | 0.00000146  | 0           |
| 0           | 0.000000232 | 0           |
| 0           | 0.000000428 | 0           |
| 0.000000929 | 0           | 0           |
| 0           | 0           | 0.000000248 |
| 0           | 0           | 0           |
| 0           | 0           | 0.0000242   |
| 0           | 0.000000164 | 0           |
| 0.0000014   | 0           | 0           |
| 0           | 5.98E-08    | 0           |
| 0           | 0           | 0.000000167 |
| 0           | 0           | 0.0000163   |
| 0           | 0           | 0           |
| 0           | 0           | 0           |
| 0.00000112  | 0           | 0           |
| 0           | 0           | 0.000000168 |
| 0.00000015  | 0           | 0           |
| 0           | 0           | 0.0000172   |
| 0           | 0           | 0           |
| 0           | 0.0000104   | 0           |
| 0.000000208 | 0.000000249 | 0           |
| 0           | 0.0000118   | 0           |
| 0           | 0.000000351 | 0           |
| 0           | 2.61E-08    | 0           |
| 0.00000217  | 0           | 0           |
| 0           | 0.00000012  | 0           |
| 0           | 0.000000159 | 0           |
| 0           | 0.000000211 | 0           |
| 0           | 0.000000185 | 0           |
| 0           | 0.000000135 | 0           |
| 0           | 0.000000171 | 0           |
| 0           | 0.000000187 | 0           |
| 0           | 0.00000162  | 0           |
| 0           | 0           | 0           |
| 0           | 0.000000551 | 0           |
| 0           | 0.000000344 | 0           |
| 0           | 0.00000117  | 0           |
| 0           | 0.00000296  | 0           |

|             |             |             |
|-------------|-------------|-------------|
| 0           | 0           | 0.000000319 |
| 0           | 0.000000139 | 0           |
| 0           | 0.000000329 | 0           |
| 0           | 8.36E-08    | 0           |
| 0           | 0           | 0           |
| 0           | 0.000000856 | 0           |
| 0           | 6.41E-08    | 0           |
| 0           | 0.00000035  | 0           |
| 0           | 0.000000155 | 0           |
| 0           | 0.000000212 | 0           |
| 0           | 9.64E-08    | 0           |
| 0           | 0.00000026  | 0           |
| 0           | 0           | 0.0000146   |
| 0           | 0.00000027  | 0           |
| 0           | 0.000000233 | 0           |
| 0           | 0.000000271 | 0           |
| 0           | 0.000000246 | 0           |
| 0           | 0.00000014  | 0           |
| 0           | 0.000000182 | 0           |
| 0           | 0           | 0           |
| 0.000000357 | 0           | 0           |
| 0           | 0           | 0           |
| 0           | 0.000000153 | 0           |
| 0           | 0.000000147 | 0           |
| 0           | 0.000000155 | 0           |
| 0           | 0           | 0           |
| 0           | 0           | 0           |
| 0           | 0.000000973 | 0           |
| 0           | 0           | 0           |
| 0.000000197 | 0.000000166 | 0           |
| 0.000000144 | 0           | 0           |
| 0           | 0.000000147 | 0           |
| 0           | 0.000000241 | 0           |
| 0           | 0           | 0           |
| 0           | 0           | 0.00000032  |
| 0           | 0.000000108 | 0           |
| 0           | 0           | 0.000017    |
| 0           | 0.000000206 | 0           |
| 0           | 0           | 0           |
| 0           | 0           | 0           |
| 0           | 0.000000207 | 0           |
| 0           | 0.000000189 | 0           |
| 0           | 0.000000217 | 0           |
| 0           | 0           | 0           |
| 0           | 0.000000215 | 0           |
| 0           | 0.000000248 | 0           |
| 0           | 0.000000191 | 0           |

|             |             |             |
|-------------|-------------|-------------|
| 0           | 0.00000203  | 0           |
| 0           | 0.00000156  | 0           |
| 0           | 8.43E-08    | 0           |
| 0           | 0.00000117  | 0           |
| 0           | 0.00000128  | 0           |
| 0           | 0.000000465 | 0           |
| 0           | 0.000000816 | 0           |
| 0           | 0.00000123  | 0           |
| 0           | 0.00000185  | 0           |
| 0           | 0.00000192  | 0           |
| 0           | 4.39E-08    | 0           |
| 0           | 0.00000156  | 0           |
| 0           | 0.000000615 | 0           |
| 0           | 0.000000625 | 0           |
| 0           | 0.00000144  | 0           |
| 0           | 0.000000732 | 0           |
| 0           | 0.00000203  | 0           |
| 0           | 0.0000112   | 0           |
| 0           | 0.00000384  | 0           |
| 0           | 0.000000706 | 0           |
| 0           | 0.000000992 | 0           |
| 0           | 0.00000132  | 0           |
| 0           | 0.00000279  | 0           |
| 0           | 5.33E-08    | 0           |
| 0.000000104 | 0.000000411 | 0           |
| 0           | 0.00000024  | 0           |
| 0           | 0.000000176 | 0           |
| 0.00000153  | 0           | 0           |
| 0           | 3.12E-08    | 0           |
| 0           | 7.56E-08    | 0           |
| 0           | 6.46E-08    | 0           |
| 0           | 6.34E-08    | 0           |
| 0           | 0.000000108 | 0           |
| 0           | 0.000000074 | 0           |
| 0           | 0.00000108  | 0           |
| 0           | 0.00000225  | 0           |
| 0           | 0.00000017  | 0           |
| 0           | 0.00000085  | 0           |
| 0           | 0.00000041  | 0           |
| 0           | 0.00000326  | 0           |
| 0           | 0.00000898  | 0           |
| 0           | 0           | 0.000000306 |
| 0           | 0.000000182 | 0           |
| 0           | 0.00000274  | 0           |
| 0           | 0.00000288  | 0           |
| 0           | 0.000000786 | 0           |
| 0           | 0.00000559  | 0           |

|             |             |             |
|-------------|-------------|-------------|
| 0           | 0.000000203 | 0           |
| 0           | 0.000000967 | 0           |
| 0           | 0           | 0.0000176   |
| 0           | 0.00000028  | 0           |
| 0           | 0.0000002   | 0           |
| 0           | 0.00000032  | 0           |
| 0           | 0.000000324 | 0           |
| 0           | 0           | 0           |
| 0           | 0.00000235  | 0           |
| 0           | 5.29E-08    | 0           |
| 0           | 0.000000363 | 0           |
| 0           | 0.000000137 | 0           |
| 0           | 0.000000597 | 0           |
| 0           | 0.000000142 | 0           |
| 0           | 0.00000508  | 0           |
| 0           | 0.000000662 | 0           |
| 0           | 0.00000036  | 0           |
| 0           | 0           | 0           |
| 0           | 0.000000116 | 0           |
| 0           | 0.00000114  | 0           |
| 0           | 0.00000127  | 0           |
| 0           | 0.000000641 | 0           |
| 0           | 0.00000905  | 0           |
| 0           | 0           | 0           |
| 0           | 0.00000056  | 0           |
| 0           | 0           | 0           |
| 0.000000144 | 0           | 0           |
| 0           | 0           | 0           |
| 0           | 0           | 0           |
| 0           | 0.000000887 | 0           |
| 0           | 0.00000114  | 0           |
| 0           | 0           | 0           |
| 0           | 0           | 0           |
| 0           | 0.00000946  | 0           |
| 0           | 0.000000572 | 0           |
| 0.00000308  | 0           | 0           |
| 0           | 0.000000406 | 0           |
| 0           | 0.000000694 | 0           |
| 0           | 0.000000534 | 0           |
| 0           | 0           | 0.000000604 |
| 0           | 0           | 0.0000116   |
| 0           | 0.00000196  | 0           |
| 0           | 7.83E-08    | 0           |
| 0           | 8.04E-08    | 0           |
| 0           | 0.00000098  | 0           |
| 0           | 0           | 0           |
| 0           | 0           | 0           |



|             |             |             |
|-------------|-------------|-------------|
| 0.00000123  | 0           | 0           |
| 0.000000934 | 0           | 0           |
| 0           | 0           | 0.0000114   |
| 0           | 3.98E-08    | 0           |
| 0           | 0.00000106  | 0           |
| 0           | 0.00000122  | 0           |
| 0.00000127  | 0           | 0           |
| 0           | 0           | 0.0000107   |
| 0           | 0.000000856 | 0           |
| 0           | 0           | 0           |
| 0           | 0           | 0           |
| 0.00000431  | 0.000000035 | 0           |
| 0           | 0           | 0           |
| 0.0000024   | 0           | 0.00000032  |
| 0.000000882 | 0           | 0           |
| 0           | 0           | 0           |
| 0           | 0.000000478 | 0           |
| 0           | 0.000000559 | 0           |
| 0           | 0.00000283  | 0           |
| 0           | 0.00000114  | 0           |
| 0           | 0.000000927 | 0           |
| 0           | 0.00000117  | 0           |
| 0           | 0.000000721 | 0           |
| 0           | 0.00000137  | 0           |
| 0           | 0.0000111   | 0           |
| 0           | 0.000000855 | 0           |
| 0           | 0.00000856  | 0           |
| 0           | 0.000000419 | 0           |
| 0.000000676 | 0           | 0           |
| 0           | 0.000000577 | 0           |
| 0           | 0.000000203 | 0           |
| 0           | 0.000000392 | 0           |
| 0.000000886 | 0           | 0           |
| 0           | 0           | 0.000000322 |
| 0           | 0           | 0.0000223   |
| 0           | 0           | 0           |
| 0           | 0           | 0           |
| 0           | 0           | 0           |
| 0           | 0.00000487  | 0           |
| 0.00000119  | 0           | 0           |
| 0           | 0           | 0.0000104   |
| 0.00000119  | 0           | 0           |
| 0           | 0           | 0.0000104   |
| 0.0000117   | 0.000000359 | 0           |
| 5.87E-08    | 0           | 0           |
| 5.87E-08    | 0           | 0           |
| 0           | 0           | 0           |

|             |             |             |
|-------------|-------------|-------------|
| 0.00000076  | 0           | 0           |
| 0           | 0           | 0           |
| 0           | 0.00000246  | 0           |
| 0           | 0.00000162  | 0           |
| 0           | 0.000000893 | 0           |
| 0           | 0.000000983 | 0           |
| 0           | 0.00000125  | 0           |
| 0           | 0.00000161  | 0           |
| 0           | 0.000000108 | 0           |
| 0.000000749 | 0           | 0           |
| 0.00000185  | 0           | 0           |
| 0           | 0.000000165 | 0           |
| 0           | 0           | 0           |
| 0.00000123  | 0           | 0           |
| 0           | 0           | 0           |
| 0           | 0.00000367  | 0           |
| 0           | 0.0000111   | 0           |
| 0           | 0.0000117   | 0           |
| 0.000000824 | 0           | 0           |
| 0           | 0.00000326  | 0           |
| 0           | 0.000000831 | 0           |
| 0           | 0.000000112 | 0           |
| 0           | 0           | 0.000000088 |
| 0           | 0.00000109  | 0           |
| 0           | 0.00000055  | 0           |
| 0           | 0           | 0.00000122  |
| 0           | 0           | 0           |
| 0           | 0.00000272  | 0           |
| 0           | 0           | 0           |
| 0.000000246 | 0           | 0           |
| 0           | 0.00000031  | 0           |
| 0           | 0.000000125 | 0           |
| 0           | 0.0000124   | 0           |
| 0           | 0.000000143 | 0           |
| 0           | 0           | 0           |
| 0.000000825 | 0           | 0           |
| 0           | 0.00000173  | 0           |
| 0           | 0.000000839 | 0           |
| 0           | 0.00000747  | 0           |
| 0           | 0.00000233  | 0           |
| 0.000000888 | 0           | 0           |
| 0           | 0.0000023   | 0           |
| 0           | 0.00000109  | 0           |
| 0           | 0.00000108  | 0           |
| 0           | 0.0000033   | 0           |
| 0           | 0.0000053   | 0           |
| 0           | 0.00000203  | 0           |

|             |             |             |
|-------------|-------------|-------------|
| 0           | 0.00000108  | 0           |
| 0           | 4.22E-08    | 0           |
| 0           | 0.000000158 | 0           |
| 0           | 0.00000126  | 0           |
| 0           | 0.000000444 | 0           |
| 0           | 0.000000486 | 0           |
| 0           | 0.00000231  | 0           |
| 0           | 0.000000954 | 0           |
| 0           | 0.00000111  | 0           |
| 0           | 0.000000916 | 0           |
| 0           | 0.000000649 | 0           |
| 0           | 0.00000142  | 0           |
| 0           | 0.0000107   | 0           |
| 0           | 0.00000408  | 0           |
| 0           | 0.000000804 | 0           |
| 0           | 0.0000009   | 0           |
| 0           | 0.000000781 | 0           |
| 0.000000627 | 0           | 0           |
| 0           | 0.000000594 | 0           |
| 0.00000079  | 0           | 0           |
| 0           | 0           | 0           |
| 0           | 0.000000645 | 0           |
| 0           | 0.000000826 | 0           |
| 0           | 0.00000477  | 0           |
| 0           | 0.000000885 | 0           |
| 0           | 0.00000101  | 0           |
| 0           | 0.000000498 | 0           |
| 0           | 0.00000201  | 0           |
| 0           | 0.000000652 | 0           |
| 0           | 0.000000825 | 0           |
| 0           | 0.000000732 | 0           |
| 0.00000144  | 0           | 0           |
| 0           | 0.000000143 | 0           |
| 0.00000398  | 0           | 0.000000629 |
| 0           | 4.36E-08    | 0           |
| 0           | 0           | 0           |
| 0           | 0           | 0.0000201   |
| 0           | 0           | 0           |
| 7.89E-08    | 0           | 0           |
| 0.000000576 | 0           | 0           |
| 0           | 0.000000039 | 0           |
| 0           | 0           | 0           |
| 0           | 7.13E-08    | 0           |
| 0           | 0.00000257  | 0           |
| 0           | 0.000000845 | 0           |
| 0           | 0.00000244  | 0           |
| 0.00000113  | 0           | 0           |

|             |             |             |
|-------------|-------------|-------------|
| 0           | 0.00000194  | 0           |
| 0           | 0.00000115  | 0           |
| 0           | 0.00000339  | 0           |
| 0           | 0           | 0.000000294 |
| 0           | 0.00000505  | 0           |
| 0           | 0.000000928 | 0           |
| 0           | 0           | 0.0000119   |
| 0           | 0.00000186  | 0           |
| 0           | 0.000000407 | 0           |
| 0           | 0.00000016  | 0           |
| 0           | 0.000000654 | 0           |
| 0           | 0           | 0           |
| 0           | 0.00000329  | 0           |
| 0.0000014   | 0           | 0           |
| 0           | 0           | 0.000000321 |
| 0           | 0           | 0.0000205   |
| 0           | 0.00000055  | 0           |
| 0           | 0.00000129  | 0           |
| 0.00000137  | 0           | 0           |
| 0           | 0           | 0.000000297 |
| 0           | 0           | 0.000015    |
| 0.00000118  | 0           | 0           |
| 0           | 0           | 0.000000281 |
| 0.00000123  | 0           | 0           |
| 0           | 0           | 0.000000295 |
| 0           | 0           | 0           |
| 0           | 0           | 0           |
| 0           | 0.00000179  | 0           |
| 0           | 0           | 0           |
| 0           | 0.00000218  | 0           |
| 0           | 0.000000957 | 0           |
| 0           | 0.00000125  | 0           |
| 0           | 0.000000979 | 0           |
| 0           | 0.00000142  | 0           |
| 0           | 0.000000982 | 0           |
| 0           | 0.000000791 | 0           |
| 0           | 0.00000174  | 0           |
| 0.00000112  | 0           | 0           |
| 0           | 0.00000229  | 0           |
| 0           | 0           | 0.0000243   |
| 0           | 0.0000022   | 0           |
| 0           | 0.000000415 | 0           |
| 0           | 0.00000226  | 0           |
| 0           | 0           | 0           |
| 0           | 4.37E-08    | 0           |
| 0           | 0.0000011   | 0           |
| 0.000000744 | 0           | 0.00000457  |

|             |             |             |
|-------------|-------------|-------------|
| 0.00000192  | 0           | 0           |
| 0           | 0.00000205  | 0           |
| 0           | 3.44E-08    | 0           |
| 0           | 0.000000971 | 0           |
| 0           | 0.00000123  | 0           |
| 0           | 0.00000488  | 0           |
| 0           | 0           | 0.000000289 |
| 0           | 9.39E-08    | 0           |
| 0           | 0.00000019  | 0           |
| 0           | 0           | 0.0000225   |
| 0           | 0.00000233  | 0           |
| 0           | 0.000000164 | 0           |
| 0.000000644 | 0           | 0.0000249   |
| 0           | 9.88E-08    | 0           |
| 0           | 0.00000039  | 0           |
| 0           | 0.000000136 | 0           |
| 0           | 0           | 3.41E-08    |
| 0           | 0           | 0           |
| 0           | 0           | 0           |
| 0           | 0           | 0           |
| 0           | 0           | 0           |
| 0           | 0.00000279  | 0           |
| 0           | 0.000000369 | 0           |
| 0           | 0.00000004  | 0           |
| 0           | 0.00000983  | 0           |
| 0           | 0.00000225  | 0           |
| 0.000000717 | 0           | 0           |
| 0           | 0.00000268  | 0           |
| 0           | 0.00000165  | 0           |
| 0           | 0.00000625  | 0           |
| 0           | 7.46E-08    | 0           |
| 0           | 0.00000124  | 0           |
| 0           | 5.77E-08    | 0           |
| 0           | 0.000000384 | 0           |
| 0           | 0.000000686 | 0           |
| 0           | 0.0000117   | 0           |
| 0           | 0           | 0.0000132   |
| 0           | 0           | 0           |
| 0           | 5.63E-08    | 0           |
| 0           | 0.000000861 | 0           |
| 0.000000859 | 0           | 0.00000399  |
| 0           | 0.0000029   | 0           |
| 0           | 0           | 0           |
| 0           | 0.00000032  | 0           |
| 0           | 0           | 0.000000325 |
| 0           | 0           | 0           |
| 0           | 0           | 0.000000124 |

|             |             |             |
|-------------|-------------|-------------|
| 0           | 0           | 0.00000103  |
| 0           | 0           | 0           |
| 0.000000693 | 0           | 0           |
| 0           | 0.000000179 | 0           |
| 0           | 0.000000481 | 0           |
| 0           | 0           | 0           |
| 0           | 0           | 0           |
| 0           | 0           | 0.000000356 |
| 0           | 0           | 0.000000309 |
| 0           | 0.0000069   | 0           |
| 0           | 0.000000302 | 0           |
| 0           | 0.000000707 | 0           |
| 0           | 0           | 0           |
| 0           | 0.00000209  | 0           |
| 0           | 0.00000183  | 0           |
| 0           | 6.01E-08    | 0           |
| 0           | 0.000000859 | 0           |
| 0           | 0.00000119  | 0           |
| 0           | 0.000000835 | 0           |
| 0           | 0.00000208  | 0           |
| 0           | 3.38E-08    | 0           |
| 0           | 0.000000729 | 0           |
| 0           | 0.00000065  | 0           |
| 0           | 0.00000106  | 0           |
| 0           | 0.000000837 | 0           |
| 0           | 0.0000046   | 0           |
| 0           | 0.00000135  | 0           |
| 0           | 0.00000289  | 0           |
| 0           | 0.000000283 | 0           |
| 0           | 0.00000161  | 0           |
| 0           | 0.00000374  | 0           |
| 0           | 0.00000153  | 0           |
| 0           | 0.000000103 | 0           |
| 0           | 0.0000151   | 0           |
| 0           | 0.0000133   | 0           |
| 0           | 0.00000102  | 0           |
| 0           | 0.000000207 | 0           |
| 0           | 0.000000086 | 0           |
| 0.00000196  | 0           | 0           |
| 0           | 7.62E-08    | 0           |
| 0           | 8.06E-08    | 0           |
| 0           | 0.00000013  | 0           |
| 0           | 0.000000103 | 0           |
| 0           | 6.91E-08    | 0           |
| 0           | 6.05E-08    | 0           |
| 0           | 8.19E-08    | 0           |
| 0           | 0.00000151  | 0           |

|   |             |             |
|---|-------------|-------------|
| 0 | 0.00000177  | 0           |
| 0 | 0.00000226  | 0           |
| 0 | 0.000000149 | 0           |
| 0 | 0.000000255 | 0           |
| 0 | 0.00000112  | 0           |
| 0 | 0.00000188  | 0           |
| 0 | 0.00000441  | 0           |
| 0 | 0.00000334  | 0           |
| 0 | 0.000000938 | 0           |
| 0 | 0.000000855 | 0           |
| 0 | 0           | 0.000000309 |
| 0 | 0.00000013  | 0           |
| 0 | 0.000000404 | 0           |
| 0 | 2.76E-08    | 0           |
| 0 | 0           | 0           |
| 0 | 6.24E-08    | 0           |
| 0 | 0.00000375  | 0           |
| 0 | 0.00000334  | 0           |
| 0 | 0.00000125  | 0           |
| 0 | 0.00000656  | 0           |
| 0 | 0.000000142 | 0           |
| 0 | 0           | 0           |
| 0 | 0           | 0.0000256   |
| 0 | 0.000000311 | 0           |
| 0 | 0.000000155 | 0           |
| 0 | 0.000000298 | 0           |
| 0 | 0           | 0           |
| 0 | 0.00000277  | 0           |
| 0 | 0.000000352 | 0           |
| 0 | 0.000000653 | 0           |
| 0 | 0.00000161  | 0           |
| 0 | 7.77E-08    | 0           |
| 0 | 0.000000885 | 0           |
| 0 | 0.000000422 | 0           |
| 0 | 0.000000221 | 0           |
| 0 | 0.00000567  | 0           |
| 0 | 0.000000856 | 0           |
| 0 | 0.000000691 | 0           |
| 0 | 0.000000646 | 0           |
| 0 | 4.32E-08    | 0           |
| 0 | 0.000000952 | 0           |
| 0 | 0           | 0           |
| 0 | 0.000000427 | 0           |
| 0 | 0.000000163 | 0           |
| 0 | 0.00000153  | 0           |
| 0 | 0.00000135  | 0           |
| 0 | 0.000000799 | 0           |

|             |             |             |
|-------------|-------------|-------------|
| 0           | 0.0000145   | 0           |
| 0           | 0.00000216  | 0           |
| 0           | 8.24E-08    | 0           |
| 0           | 0           | 0           |
| 0           | 0           | 0           |
| 0           | 0.000000587 | 0           |
| 0           | 0           | 0           |
| 6.46E-08    | 0           | 0           |
| 0           | 9.77E-08    | 0           |
| 0           | 6.29E-08    | 0           |
| 0           | 0.00000274  | 0           |
| 0.0000235   | 0.0000573   | 0.0000335   |
| 0           | 6.27E-08    | 0           |
| 0           | 0.000000297 | 0           |
| 0.000405293 | 0.000197283 | 0.0000509   |
| 0.00000073  | 0.00000056  | 0.000000391 |
| 0.00053835  | 0.000632442 | 0.000644614 |
| 0           | 0.000000114 | 0           |
| 0.00000032  | 0.00000274  | 0.00000104  |
| 0           | 0.00000271  | 0           |
| 0.000000116 | 0.000000432 | 0.000000285 |
| 0.0000007   | 0           | 0           |
| 0.000000601 | 0.00000031  | 0.000000764 |
| 0.000604416 | 0.000357451 | 0.000269279 |
| 0.000000105 | 0.000000365 | 0.000000247 |
| 0           | 0           | 0.000000442 |
| 0           | 0.000000192 | 0           |
| 0           | 0.000000192 | 0           |
| 0.000235284 | 0.000117888 | 0.0000246   |
| 0           | 0.000000323 | 0           |
| 0           | 0.000000323 | 0           |
| 0           | 0.00000303  | 0           |
| 0.00000839  | 0.0000127   | 0.00000601  |
| 0.000000316 | 0.00000206  | 0.00000106  |
| 0.0000456   | 0.00018864  | 0.0000496   |
| 0           | 7.22E-08    | 0           |
| 0           | 0.00000285  | 0           |
| 0.0000357   | 0.0000342   | 0.000146532 |
| 0           | 7.27E-08    | 0           |
| 0           | 0.000000695 | 0.000000536 |
| 0           | 0.00000299  | 0           |
| 0.000149876 | 0.000162602 | 0.000192876 |
| 0.000000615 | 0.000000131 | 0           |
| 0           | 6.15E-08    | 0           |
| 0           | 0.000000115 | 0           |
| 0.0000394   | 0.0000543   | 0.00000373  |
| 0.000028    | 0.0000758   | 0.0000455   |



|             |             |             |
|-------------|-------------|-------------|
| 0           | 0.0000006   | 0           |
| 0           | 0.00397135  | 0           |
| 0.000000271 | 0.000000697 | 0.000000384 |
| 0           | 0.000000147 | 0           |
| 0           | 0.000000253 | 0           |
| 0           | 9.18E-08    | 0           |
| 0           | 0.000000517 | 0           |
| 0.000203933 | 0.000187064 | 0.000184405 |
| 0           | 0.000000124 | 0           |
| 0           | 7.11E-08    | 0           |
| 0.000135175 | 0.000263022 | 0.000175569 |
| 0.000102202 | 0.000205065 | 0.000387471 |
| 0           | 0.00000127  | 0           |
| 0           | 0.000000495 | 0           |
| 0.00032265  | 0.0001458   | 0.0000391   |
| 0.000000276 | 0.00000134  | 0.000000831 |
| 0           | 0           | 0           |
| 0           | 0.00000344  | 0.00000162  |
| 0.0000902   | 0.000176449 | 0.00000173  |
| 0           | 0.000000108 | 0           |
| 0           | 0           | 0           |
| 0           | 0           | 0           |
| 0           | 0           | 0           |
| 0.000313492 | 0.000288517 | 0.000270703 |
| 0.000273534 | 0.000371063 | 0.000402343 |
| 0           | 0.000000123 | 0           |
| 0           | 0.000000364 | 0.000000294 |
| 0.0000096   | 0.00000959  | 0.00000112  |
| 0.00000106  | 0.000000864 | 0.000000505 |
| 0.000465721 | 0.000408225 | 0.000336869 |
| 0           | 0.000000111 | 0           |
| 0           | 0.000000177 | 0           |
| 0           | 0.000000116 | 0           |
| 0           | 0.000000114 | 0           |
| 0           | 0.000000114 | 0           |
| 0           | 0.000000587 | 0           |
| 0           | 0.00000012  | 0           |
| 0           | 0.000000409 | 0           |
| 0.000136081 | 0.000298409 | 0.000336239 |
| 0.000000781 | 0.00000015  | 0.000000375 |
| 0.00000525  | 0.0000237   | 0.0000191   |
| 0           | 0           | 0           |
| 0           | 0.000000156 | 0           |
| 0           | 0.000000389 | 0.000000272 |
| 0.0000747   | 0.000216096 | 0.00027733  |
| 0           | 0.00000843  | 0           |
| 0           | 0           | 0           |

|             |             |             |
|-------------|-------------|-------------|
| 0           | 0           | 0           |
| 0.000352224 | 0.000443319 | 0.000501396 |
| 0.000582177 | 0.000680838 | 0.000530234 |
| 0           | 0.00000147  | 0.00000135  |
| 0           | 0.0000002   | 0           |
| 0           | 0           | 0           |
| 0           | 0.000000146 | 0           |
| 0.000207542 | 0.000180913 | 0.0000895   |
| 0           | 0.000000515 | 0           |
| 0           | 0.00000023  | 0           |
| 0.000368937 | 0.000480847 | 0.000504951 |
| 0           | 0.000000122 | 0           |
| 0.00000107  | 0.00000237  | 0.00000159  |
| 0.000000538 | 0.000000447 | 0.000000282 |
| 0           | 0.00000108  | 0.000000935 |
| 0           | 0.000000125 | 0           |
| 0           | 0.000000154 | 0           |
| 0           | 0.000000154 | 0           |
| 0.0000189   | 0.0000116   | 0.00000287  |
| 0           | 0.000000193 | 0           |
| 0           | 0           | 0           |
| 0           | 0.000000134 | 0           |
| 0           | 0.000000161 | 0           |
| 0           | 0.000000683 | 0           |
| 0           | 0.000000222 | 0           |
| 0.00000217  | 0.00000531  | 0.0000341   |
| 0           | 0.00000014  | 0           |
| 0           | 0.000000145 | 0           |
| 0.000111899 | 0.000331666 | 0.000268862 |
| 0           | 0.000000153 | 0           |
| 0           | 0.000000109 | 0           |
| 0           | 0.00000014  | 0           |
| 0           | 0.000000132 | 0           |
| 0           | 5.47E-08    | 0           |
| 0.000000419 | 0.00000232  | 0.000000551 |
| 0           | 0.000000266 | 0           |
| 0           | 0.00000011  | 0           |
| 0           | 0.0000022   | 0           |
| 0           | 0.00000015  | 0           |
| 0.0000818   | 0.000254861 | 0.000192694 |
| 0.000419282 | 0.000680838 | 0.000550733 |
| 0.000419282 | 0.000680838 | 0.000550733 |
| 0           | 0.000000167 | 0           |
| 0           | 0.000000123 | 0.00000021  |
| 0           | 0.000000123 | 0.00000021  |
| 0.0000964   | 0.000174737 | 0.000120931 |
| 0           | 9.87E-08    | 0           |

|             |             |             |
|-------------|-------------|-------------|
| 0           | 0.000000168 | 0           |
| 0           | 0.000000186 | 0           |
| 0           | 0.000000157 | 0           |
| 0           | 0.000000141 | 0           |
| 0           | 0.000000169 | 0           |
| 0           | 0.000000307 | 0           |
| 0           | 0.000000103 | 0           |
| 0.00000635  | 0.0000145   | 0           |
| 0.000000123 | 0.000000558 | 0           |
| 0           | 0.000000193 | 0           |
| 0           | 0.000000736 | 0           |
| 0.000036    | 0.0000266   | 0.0000097   |
| 0           | 0.000000111 | 0           |
| 0           | 0.000000189 | 0           |
| 0           | 0.000000178 | 0           |
| 0           | 0.000000313 | 0           |
| 0.0000504   | 0.000190458 | 0.0000472   |
| 0.00000306  | 0.00000881  | 0           |
| 0.00000116  | 0.00000212  | 0           |
| 0.0000237   | 0.0000822   | 0.0000447   |
| 0.000169561 | 0.000325943 | 0.00018311  |
| 0.00000249  | 0.00000696  | 0           |
| 0           | 0.000000171 | 0           |
| 0.00000726  | 0.0000192   | 0           |
| 0           | 0.000000187 | 0           |
| 0           | 0.00000011  | 0.0000005   |
| 0           | 0.00000018  | 0           |
| 0           | 0.00000018  | 0           |
| 0.000114788 | 0.000237823 | 0.00021822  |
| 0.00000295  | 0.0000105   | 0           |
| 0.0000036   | 0.0000116   | 0.00000158  |
| 0           | 0.000000212 | 0           |
| 0.233267    | 0.338666    | 0.242221    |
| 0.0000027   | 0.0000105   | 0           |
| 0           | 0.00000015  | 0.000000192 |
| 0.000105322 | 0.0000809   | 0.00000335  |
| 0.00000236  | 0.00000645  | 0           |
| 0.000224978 | 0.000258275 | 0.0000533   |
| 0           | 0.000000274 | 0           |
| 0.000000208 | 0.000000468 | 0           |
| 0.00000239  | 0.00000704  | 0           |
| 0.00138671  | 0.00171447  | 0           |
| 0.0000183   | 0.0000176   | 0.00000606  |
| 0.00000274  | 0.00000768  | 0           |
| 0           | 0.000000277 | 0           |
| 0.00000197  | 0.00000328  | 0           |
| 0.000137936 | 0.000332795 | 0.000160552 |

|             |             |             |
|-------------|-------------|-------------|
| 0.0000774   | 0.000376673 | 0.000262688 |
| 0.00000272  | 0.00000788  | 0           |
| 0.0000363   | 0.0000105   | 0.00000194  |
| 0           | 0.000000104 | 0           |
| 0.00000257  | 0.00000764  | 0           |
| 0.00000346  | 0.0000128   | 0           |
| 0           | 0.00000015  | 0           |
| 0.00000109  | 0.0000132   | 0.00000343  |
| 0           | 7.09E-08    | 0           |
| 0.00000263  | 0.00000815  | 0           |
| 0.000252968 | 0.000279961 | 0.0000613   |
| 0.0000026   | 0.00000869  | 0           |
| 0.000000173 | 0.00000031  | 0           |
| 0.000337973 | 0.000411717 | 0.000286698 |
| 0.00000241  | 0.00000787  | 0           |
| 0.0000025   | 0.00000784  | 0           |
| 0           | 6.03E-08    | 0           |
| 0.00022171  | 0.000450772 | 0.000177182 |
| 0.0000289   | 0.0000372   | 0.0000192   |
| 0.00000158  | 0.00000367  | 0.00000206  |
| 0.00000292  | 0.00000813  | 0           |
| 8.85E-08    | 0.000000371 | 0           |
| 0.00000208  | 0.0000123   | 0           |
| 0.00000261  | 0.0000104   | 0           |
| 0.00000325  | 0.00000875  | 0           |
| 0.000000264 | 0.00000125  | 0.000000708 |
| 0.000224178 | 0.000265068 | 0.000053    |
| 0           | 3.97E-08    | 0           |
| 0.00000315  | 0.0000127   | 0           |
| 0           | 0.000000266 | 0           |
| 0.0000042   | 0.0000327   | 0.000000231 |
| 0.00000205  | 0.00000505  | 0.00000296  |
| 0           | 0.000000175 | 0.000000182 |
| 0.00000165  | 0.00000507  | 0           |
| 0           | 0           | 0           |
| 0.00000211  | 0.00000993  | 0           |
| 0           | 0.000000141 | 0           |
| 0.000129537 | 0.00017706  | 0.0000289   |
| 0.00000277  | 0.00000885  | 0           |
| 0.00000248  | 0.00000722  | 0           |
| 0.00000248  | 0.00000722  | 0           |
| 0.00000226  | 0.00000788  | 0           |
| 0.00000186  | 0.00000075  | 0           |
| 0.000000168 | 0.000000338 | 0           |
| 0           | 0.000000438 | 0           |
| 0.000234462 | 0.000530786 | 0.000393885 |
| 0.0000426   | 0.0000851   | 0.000152615 |

|             |             |             |
|-------------|-------------|-------------|
| 0           | 0.000000458 | 0           |
| 0.00000259  | 0.00000737  | 0           |
| 0.00000238  | 0.0000076   | 0           |
| 0           | 0.0000249   | 0.00000694  |
| 0.00000185  | 0.00000578  | 0           |
| 0.00000185  | 0.00000578  | 0           |
| 0.00000187  | 0.00000776  | 0           |
| 0.00000214  | 0.0000068   | 0           |
| 7.99E-08    | 0.000000294 | 0           |
| 9.27E-08    | 0.000000455 | 0           |
| 0.00000254  | 0.00000819  | 0           |
| 0.00000211  | 0.0000105   | 0           |
| 0.0000015   | 0.00000919  | 0           |
| 0.00000196  | 0.00000654  | 0           |
| 0.00000243  | 0.0000105   | 0           |
| 0.00000233  | 0.0000072   | 0           |
| 0           | 0.000000108 | 0           |
| 0.00000239  | 0.0000077   | 0           |
| 0.00000447  | 0.0000116   | 0           |
| 0.00000135  | 0.0000038   | 0.00000214  |
| 0           | 0.000000116 | 0           |
| 0.000113641 | 0.000429887 | 0.000297602 |
| 0.00000225  | 0.00000782  | 0           |
| 0.00000375  | 0.00000985  | 0.00000255  |
| 0.00000503  | 0.0000382   | 0.000000277 |
| 0.00000228  | 0.00000744  | 0           |
| 0.00000199  | 0.00000708  | 0           |
| 0.000000145 | 0.000000393 | 0           |
| 0.00000239  | 0.00000832  | 0           |
| 0.00000225  | 0.00000795  | 0           |
| 0.00000147  | 0.00000644  | 0           |
| 0.00000224  | 0.00000783  | 0           |
| 0.00000223  | 0.00000796  | 0           |
| 0.00000244  | 0.00000998  | 0           |
| 0.0811398   | 0.0249312   | 0.00190843  |
| 0.00000151  | 0.00000653  | 0           |
| 0.000000106 | 0.000000472 | 0           |
| 0.00000215  | 0.00000801  | 0           |
| 0.00000237  | 0.00000876  | 0           |
| 0.00000021  | 0.000000495 | 0           |
| 0.000000605 | 0.000000554 | 0.000000381 |
| 0.000041    | 0.0000168   | 0.00000036  |
| 0.00000186  | 0.00000649  | 0           |
| 0.00000167  | 0.00000835  | 0           |
| 0.00000167  | 0.00000835  | 0           |
| 0.000000583 | 0.000000909 | 0.000000476 |
| 0.0000022   | 0.00000691  | 0           |

|             |             |             |
|-------------|-------------|-------------|
| 0.00000219  | 0.00000693  | 0           |
| 0.00000221  | 0.00000827  | 0           |
| 0.00000206  | 0.00000668  | 0           |
| 0.000000198 | 0.000000494 | 0           |
| 0.000000164 | 0.000000475 | 0           |
| 0.00250268  | 0.00848289  | 0           |
| 0.00000165  | 0.00000848  | 0           |
| 0           | 0.00000105  | 0.000000271 |
| 0.00000052  | 0.000000842 | 0.0000005   |
| 0.00000165  | 0.00000286  | 0.00000198  |
| 0.00000239  | 0.00000726  | 0           |
| 0           | 0.00000012  | 9.08E-08    |
| 0.000123786 | 0.000218746 | 0.0000378   |
| 0.000000181 | 0.000000425 | 0           |
| 0.0000286   | 0.0000309   | 0.0000114   |
| 0.000142835 | 0.000548751 | 0.000322548 |
| 0.000142835 | 0.000548751 | 0.000322507 |
| 0           | 0.000000245 | 0.000000178 |
| 0           | 0.00000034  | 0           |
| 9.41E-08    | 0.00000059  | 0           |
| 0           | 0.00000115  | 0           |
| 0.000101301 | 0.000178843 | 0.0000943   |
| 0.00000238  | 0.00000669  | 0.00000864  |
| 0.000000158 | 0.00000041  | 0           |
| 0.0000053   | 0.00000452  | 0           |
| 0           | 0.000000251 | 0.000000174 |
| 0.000300689 | 0.000616819 | 0.000199505 |
| 0           | 0.000000305 | 0.00000021  |
| 0.000045    | 0.0000195   | 0.00000339  |
| 0.000000128 | 0.000000414 | 0           |
| 0.0000207   | 0.000107816 | 0.00000476  |
| 0.000000189 | 0.000000496 | 0           |
| 0.00000946  | 0.0000147   | 0.00000718  |
| 0.000139745 | 0.00038361  | 0.000195215 |
| 0.00000684  | 0.0000378   | 0           |
| 0.0000153   | 0.0000133   | 0.00000382  |
| 0           | 0.0024674   | 0.0016595   |
| 0           | 0.00000481  | 0           |
| 0           | 0.00000767  | 0.00000108  |
| 0.000118506 | 0.000274243 | 0.0000976   |
| 0           | 0.000000322 | 0.000000203 |
| 0.00000105  | 0.00000168  | 0.00000106  |
| 0.0000162   | 0.000102345 | 0.00000225  |
| 0           | 0.000280053 | 0.000174742 |
| 0.000000179 | 0.000000477 | 0           |
| 0           | 0.000000524 | 0.00000032  |
| 0           | 0.000000569 | 0.000000343 |

|             |             |             |
|-------------|-------------|-------------|
| 0           | 0.00000961  | 0.00000113  |
| 0.0000015   | 0.00000278  | 0           |
| 0.00000189  | 0.00000403  | 0           |
| 0           | 0.000000626 | 0.000000375 |
| 0.0000069   | 0.0000102   | 0.0000124   |
| 0           | 0.000000878 | 0.000000225 |
| 0           | 0.000000641 | 0.000000381 |
| 0           | 0.000000641 | 0.000000381 |
| 0.000036    | 0.000136393 | 0.0000407   |
| 4.48E-08    | 0.000000384 | 0           |
| 0.00000194  | 0.00000401  | 0           |
| 0.00000194  | 0.00000401  | 0           |
| 0           | 0.0000112   | 0           |
| 0.0000458   | 0.000110548 | 0.000143834 |
| 0.000000199 | 0.00000059  | 0           |
| 8.44E-08    | 0.000000426 | 0           |
| 0.00000967  | 0.0000306   | 0.0000643   |
| 0.0000149   | 0.0000738   | 0.0000239   |
| 0.000288449 | 0.000653426 | 0.000184134 |
| 0           | 0.000000403 | 0           |
| 0.00000168  | 0.0000038   | 0           |
| 0.0000227   | 0.000151755 | 0.0000269   |
| 0.00000618  | 0.000017    | 0.0000114   |
| 0.00258156  | 0.0074474   | 0           |
| 0.0000165   | 0.0000254   | 0.00000868  |
| 0           | 0.000000602 | 0.000000331 |
| 0.000390508 | 0.000638682 | 0.000124353 |
| 0.000000437 | 0.000000561 | 0.000000084 |
| 0           | 0.000000578 | 0.000000315 |
| 0.00000253  | 0.0000139   | 0           |
| 0           | 0.000000324 | 0.000000174 |
| 0.00000018  | 0.000000399 | 0           |
| 4.83E-08    | 0.000000483 | 0           |
| 0.0000709   | 0.000167243 | 0.0000175   |
| 0.0000342   | 0.0000536   | 0.0000282   |
| 5.11E-08    | 0.000000421 | 0           |
| 0.0000153   | 0.0000151   | 0.00000369  |
| 3.76E-08    | 0.000000364 | 0           |
| 0.0000164   | 0.0000233   | 0.00000765  |
| 0.000000189 | 0.000000305 | 0           |
| 0.000000189 | 0.000000305 | 0           |
| 0.00000145  | 0.00000368  | 0           |
| 0.00281807  | 0.00607775  | 0           |
| 0           | 0.0000171   | 0.00000707  |
| 0.000177022 | 0.000565958 | 0           |
| 0.00000167  | 0.00000342  | 0           |
| 0.00000122  | 0.00000289  | 0           |

|             |             |             |
|-------------|-------------|-------------|
| 5.48E-08    | 0.000000424 | 0           |
| 0.00000152  | 0.00000779  | 0           |
| 0.0000121   | 0.0000156   | 0.00000384  |
| 0.000000108 | 0.000000309 | 0           |
| 0.00000183  | 0.00000384  | 0           |
| 0.00000155  | 0.00000317  | 0           |
| 0.00000152  | 0.00000324  | 0           |
| 0.00000152  | 0.00000324  | 0           |
| 0.000270167 | 0.000456067 | 0.000134717 |
| 0.0000014   | 0.00000366  | 0           |
| 0.000262981 | 0.000654834 | 0.000154716 |
| 0.00000151  | 0.00000309  | 0           |
| 7.57E-08    | 0.000000411 | 0           |
| 5.42E-08    | 0.000000423 | 0           |
| 0.00000273  | 0.0000157   | 0.00000249  |
| 0.0000273   | 0.0000396   | 0.0000364   |
| 0.000000148 | 0.000000377 | 0           |
| 0.000000625 | 0.000000875 | 0.000000338 |
| 0.0000011   | 0.00000197  | 0.000000589 |
| 0           | 0.000000822 | 0.000000385 |
| 0.0000466   | 0.000158164 | 0.00000393  |
| 0.0000211   | 0.0000177   | 0.00000337  |
| 0.00000955  | 0.0000228   | 0.00000702  |
| 0           | 0.000000514 | 0.000000237 |
| 0.000000152 | 0.000000383 | 0           |
| 0.0000148   | 0.0000171   | 0.00000258  |
| 0.00000149  | 0.0000038   | 0           |
| 0           | 0.00000287  | 0.000000501 |
| 0.00000123  | 0.00000313  | 0           |
| 0.000000232 | 0.000000581 | 0.000000255 |
| 0.000000311 | 0.00000479  | 0.000000801 |
| 0.000000223 | 0.000000532 | 0.000000229 |
| 0           | 0.000000384 | 0.000000165 |
| 5.13E-08    | 0.000000396 | 0           |
| 0           | 0.00000259  | 0.000000632 |
| 0.000000162 | 0.000000598 | 0           |
| 0.000000271 | 0.000000637 | 0.000000263 |
| 0.000000206 | 0.00000171  | 0.000000051 |
| 0           | 0.000000697 | 0.000000347 |
| 0.00000019  | 0.000000568 | 0.000000234 |
| 0           | 0.000000551 | 0           |
| 0           | 0.000000632 | 0.000000257 |
| 0.0000406   | 0.000155424 | 0.000000507 |
| 0.000000184 | 0.000000542 | 0.000000217 |
| 0.000000144 | 0.000000491 | 0           |
| 0.0000199   | 0.000142076 | 0.000000563 |
| 0.000000106 | 0.000000499 | 0           |



|             |             |             |
|-------------|-------------|-------------|
| 0.000000191 | 0.000000816 | 0.000000311 |
| 0.000000191 | 0.000000816 | 0.000000311 |
| 6.32E-08    | 0.000000434 | 0           |
| 0.0000436   | 0.000146973 | 0.000153067 |
| 0           | 0.000000653 | 0.000000247 |
| 0.000000168 | 0.000000726 | 0.000000272 |
| 0.000000184 | 0.000000659 | 0.000000247 |
| 0.000000171 | 0.000000837 | 0.000000313 |
| 0.000000193 | 0.00000104  | 0.000000376 |
| 0.000000249 | 0.000000856 | 0.000000309 |
| 0.000136554 | 0.000424182 | 0.000148351 |
| 0.000000019 | 0.000000666 | 0.000000233 |
| 0.0318402   | 0.0895219   | 0.0469319   |
| 0.0000329   | 0.00000443  | 5.16E-08    |
| 0.0000109   | 0.0000164   | 0.00000271  |
| 0.0000027   | 0.00000689  | 0.00000306  |
| 0.000000286 | 0.000000991 | 0.00000034  |
| 0.000000286 | 0.000000991 | 0.00000034  |
| 0.000000128 | 0.000000481 | 0           |
| 0.000000198 | 0.000000964 | 0.000000329 |
| 0           | 0.00000117  | 0.000000401 |
| 0           | 0.00000117  | 0.000000401 |
| 0           | 0.000000568 | 0           |
| 0.000000225 | 0.000000685 | 0.00000023  |
| 0           | 0.000000938 | 0           |
| 0.000000221 | 0.000000958 | 0.00000032  |
| 0.000000279 | 0.00000361  | 0.000000763 |
| 0.000000114 | 0.000000444 | 0           |
| 0.000000272 | 0.00000105  | 0.000000345 |
| 0.0000002   | 0.000000698 | 0.000000229 |
| 0.000000172 | 0.000000893 | 0.000000293 |
| 0           | 0.00000608  | 0.000000659 |
| 0.000000314 | 0.00000097  | 0.000000318 |
| 0.000000314 | 0.000000975 | 0.000000318 |
| 0.000000326 | 0.000000747 | 0.000000242 |
| 0.0000193   | 0.0000425   | 0.00000776  |
| 0.00000958  | 0.0000221   | 0.00000591  |
| 9.84E-08    | 0.000000273 | 0           |
| 0.000000255 | 0.000000753 | 0.000000236 |
| 0.000000259 | 0.000000475 | 0.000000149 |
| 4.21E-08    | 0.000000407 | 0           |
| 0.000305302 | 0.000411564 | 0.0000882   |
| 0           | 0.00000557  | 0           |
| 0           | 0.00000184  | 0           |
| 0.000000293 | 0.00000108  | 0.000000322 |
| 0.000000293 | 0.00000108  | 0.000000322 |
| 0           | 0.00000068  | 0.0000002   |

|             |             |             |
|-------------|-------------|-------------|
| 0.00000834  | 0.000102291 | 0.0000158   |
| 0.000000708 | 0.00000934  | 0           |
| 0.0000128   | 0.0000233   | 0.00000508  |
| 0           | 0.000000709 | 0.000000195 |
| 0.000000463 | 0.00000172  | 0           |
| 0.0000356   | 0.00017152  | 0.000207822 |
| 0.0000138   | 0.000147344 | 0.00000604  |
| 8.14E-08    | 0.00000109  | 0.000000293 |
| 0.000000293 | 0.00000108  | 0.000000287 |
| 0.000000332 | 0.000000696 | 0.000000182 |
| 0.00000328  | 0.00000313  | 0.000000787 |
| 0.0000224   | 0.0000413   | 0.0000135   |
| 0.000000331 | 0.00000682  | 0           |
| 0.000000442 | 0.00000169  | 0.000000394 |
| 0.000000166 | 0.00000207  | 0           |
| 0.00000176  | 0.00000204  | 0.000000527 |
| 0.0000258   | 0.0000531   | 0.0000113   |
| 0.000000302 | 0.00000186  | 0           |
| 0.0000199   | 0.000152516 | 0.00000667  |
| 0.00000883  | 0.0000668   | 0.0000418   |
| 0.000000273 | 0.00000251  | 0           |
| 0           | 0.000000578 | 0           |
| 0.000000221 | 0.00000175  | 0           |
| 0.00000922  | 0.00003     | 0.00000325  |
| 0.000000187 | 0.00000163  | 0           |
| 0.000000303 | 0.0000094   | 0           |
| 0.0000187   | 0.0000305   | 0.00000679  |
| 0.00000182  | 0.0000215   | 0.00000302  |
| 5.56E-08    | 0.000000373 | 0           |
| 0.00000959  | 0.00003     | 0.00000396  |
| 0           | 0.000000884 | 0.000000166 |
| 0.0000374   | 0.0000481   | 0.00000483  |
| 0.00000175  | 0.00000992  | 0.00000331  |
| 0.00000805  | 0.0000685   | 0.000035    |
| 0.00000189  | 0.0000164   | 0.0000162   |
| 0           | 0.00000147  | 0.0000001   |
| 0.000245346 | 0.00428686  | 0           |
| 0.000000154 | 0.00000253  | 0           |
| 0.000000159 | 0.00000208  | 0           |
| 0.000000433 | 0.00000346  | 0.000000833 |
| 9.83E-08    | 0.00000138  | 0           |
| 0.0000135   | 0.0000319   | 0.0000105   |
| 0           | 0.00000043  | 7.13E-08    |
| 0.000000108 | 0.0000015   | 0           |
| 0.0000133   | 0.0000482   | 0.0000238   |
| 0           | 0.000000773 | 0.000000124 |
| 0           | 0.00000818  | 0           |

|             |             |             |
|-------------|-------------|-------------|
| 0.0000381   | 0.000218037 | 0.000012    |
| 0.0000415   | 0.0000666   | 0.00000521  |
| 0.0000308   | 0.0000879   | 0.0000196   |
| 0           | 0.0000013   | 0.000000192 |
| 0.000000172 | 0.00000155  | 0           |
| 0.00000948  | 0.0000668   | 0.0000249   |
| 0.00000179  | 0.0000106   | 0.00000359  |
| 0.000000313 | 0.0000024   | 0           |
| 0           | 0.00000653  | 0.00000194  |
| 0.0000884   | 0.000234303 | 0.00011941  |
| 0           | 0.00000255  | 0           |
| 0.00000695  | 0.0000289   | 0.00000923  |
| 0           | 0.0000011   | 0           |
| 0.00000424  | 0.0000204   | 0.00000491  |
| 0           | 0.000000732 | 9.38E-08    |
| 0           | 0.000000732 | 9.38E-08    |
| 0.000047    | 0.000273138 | 0.0000154   |
| 0.000000236 | 0.000000591 | 7.48E-08    |
| 0           | 0.000000927 | 0.000000112 |
| 8.42E-08    | 0.00000183  | 0           |
| 0           | 0.00000102  | 0.000000122 |
| 0           | 0.00000104  | 0.000000122 |
| 0           | 0.000000871 | 0.000000102 |
| 0.00000849  | 0.0000195   | 0.00000434  |
| 0           | 0.00000195  | 0.000000222 |
| 0           | 0.0000013   | 0.000000143 |
| 0           | 0.00000168  | 0.000000184 |
| 0.00000211  | 0.00000768  | 0.0000009   |
| 0           | 0.00000409  | 0.00000081  |
| 0           | 0.000000759 | 0.000000077 |
| 0.000147433 | 0.0000458   | 0.000000371 |
| 0           | 0.0000143   | 0           |
| 0.00000242  | 0.00000244  | 0.000000432 |
| 0.0000135   | 0.0000712   | 0.0000125   |
| 0           | 0.00000116  | 0.000000111 |
| 0.000000222 | 0.000000707 | 6.76E-08    |
| 0.00000012  | 0.00000228  | 0           |
| 0.00000012  | 0.00000228  | 0           |
| 0.00000577  | 0.0000186   | 0.00000236  |
| 0.000000123 | 0.000000806 | 0           |
| 0.00000199  | 0.0000076   | 0.000000404 |
| 0.00000627  | 0.0000162   | 0.00000384  |
| 0           | 0.00000146  | 0.000000134 |
| 0.00015308  | 0.0000486   | 0.000000383 |
| 0.00000247  | 0.00000255  | 0.0000004   |
| 0.0000253   | 0.000140052 | 0.0000315   |
| 0           | 0.00000131  | 0.000000116 |

|             |             |             |
|-------------|-------------|-------------|
| 0           | 0.000000666 | 0           |
| 0.000171509 | 0.0000509   | 0.000000412 |
| 0           | 0.00000123  | 0.000000106 |
| 0.000000239 | 0.000000678 | 5.88E-08    |
| 0           | 0.00000122  | 0.000000105 |
| 0.00000193  | 0.00000467  | 0.000000467 |
| 0.000153841 | 0.0000434   | 0.000000228 |
| 0.000156049 | 0.0000447   | 0.000000023 |
| 0.00000306  | 0.0000203   | 0.000000112 |
| 0.000151673 | 0.0000437   | 0.000000235 |
| 0.000133217 | 0.0000395   | 0.000000291 |
| 0           | 0.00000102  | 8.27E-08    |
| 0.00000882  | 0.0000257   | 0.000000292 |
| 0           | 0.00000221  | 0           |
| 0.000000376 | 0.00000556  | 0.000000303 |
| 0.00000241  | 0.00000297  | 0.000000423 |
| 0.000161176 | 0.0000535   | 0.000000311 |
| 0.0000402   | 0.0000366   | 0.000000579 |
| 0.0308487   | 0.0257696   | 0.000389167 |
| 0.000000197 | 0.000000804 | 0           |
| 0.000000197 | 0.000000804 | 0           |
| 0           | 0.00000205  | 0.000000149 |
| 0           | 0.000000959 | 6.98E-08    |
| 0           | 0.00000103  | 7.51E-08    |
| 0.000137473 | 0.0000433   | 0.000000253 |
| 0.000137473 | 0.0000433   | 0.000000253 |
| 0.0000333   | 0.0000311   | 0.000000056 |
| 0           | 0.00000148  | 0.000000106 |
| 0.000159978 | 0.0000513   | 0.000000296 |
| 0.0000036   | 0.0000232   | 0.000000167 |
| 0           | 0.00000108  | 7.48E-08    |
| 0.0000313   | 0.0000274   | 0.000000377 |
| 0.0000313   | 0.0000274   | 0.000000377 |
| 0.0000345   | 0.0000311   | 0.000000611 |
| 0.000000049 | 0.000000239 | 0           |
| 0.000152502 | 0.000051    | 0.000000271 |
| 0.0000318   | 0.0000313   | 0.000000484 |
| 0.0000156   | 0.0000579   | 0.000000488 |
| 0           | 0.00000109  | 7.36E-08    |
| 0           | 0.00000109  | 7.36E-08    |
| 0.000000383 | 0.00000142  | 0           |
| 0.0000368   | 0.0000342   | 0.000000519 |
| 0.0000432   | 0.0000428   | 0.000000548 |
| 0           | 0.000000931 | 6.24E-08    |
| 0.0000298   | 0.0000301   | 0.000000447 |
| 0.0000068   | 0.0000189   | 0.000000226 |
| 0.000106784 | 0.000127086 | 0.000000537 |

|             |             |             |
|-------------|-------------|-------------|
| 0.0000368   | 0.0000342   | 0.000000519 |
| 0           | 0.0128318   | 0.000340956 |
| 0.000192912 | 0.0000665   | 0.000000435 |
| 0.000034    | 0.0000342   | 0.000000549 |
| 0.000034    | 0.0000342   | 0.000000549 |
| 0           | 0.00000133  | 8.48E-08    |
| 0.0000447   | 0.0000422   | 0.000000643 |
| 0.000000152 | 0.00000729  | 0.000000625 |
| 7.16E-08    | 0.000000366 | 0           |
| 7.16E-08    | 0.000000366 | 0           |
| 0.0000517   | 0.0000463   | 0.000000646 |
| 0.000132478 | 0.0000374   | 0.000000148 |
| 0           | 0.00000246  | 0.00000228  |
| 0           | 0.00000135  | 8.24E-08    |
| 0.000000176 | 0.000000869 | 0           |
| 0.0000345   | 0.0000323   | 0.000000046 |
| 0           | 0.00000129  | 7.75E-08    |
| 0.0000377   | 0.0000352   | 0.000000554 |
| 0.00000807  | 0.0000276   | 0.000000531 |
| 0           | 0.00000989  | 0.000000457 |
| 0.00000751  | 0.0000198   | 0.000000199 |
| 0           | 0.000000848 | 4.93E-08    |
| 0           | 0.0000139   | 0.000000487 |
| 0           | 0.000000839 | 4.81E-08    |
| 0           | 0.000000949 | 5.43E-08    |
| 0           | 0.00000394  | 0.000000517 |
| 0.00000406  | 0.000024    | 0.000000562 |
| 0.0000307   | 0.0000299   | 0.000000432 |
| 0.0000354   | 0.000159053 | 0.0000243   |
| 0.0000198   | 0.000141441 | 0.000033    |
| 0.0000451   | 0.0000813   | 0.000000547 |
| 0.000108087 | 0.000773848 | 0.0000616   |
| 0.0000332   | 0.0000316   | 0.000000546 |
| 0           | 0.00000103  | 5.63E-08    |
| 0.00000235  | 0.00000315  | 0.000000331 |
| 0           | 0.00000104  | 5.57E-08    |
| 0.0000345   | 0.0000331   | 0.000000411 |
| 0.0000355   | 0.0000341   | 0.000000407 |
| 0.0000309   | 0.0000307   | 0.000000413 |
| 0           | 0.00000132  | 6.79E-08    |
| 0.00000234  | 0.00000307  | 0.000000314 |
| 0.00000234  | 0.00000307  | 0.000000314 |
| 0           | 0.00453673  | 0.000231002 |
| 0.0000374   | 0.0000377   | 0.000000423 |
| 0.0000328   | 0.0000321   | 0.000000359 |
| 0           | 0.0000139   | 0.000000487 |
| 0.0000428   | 0.000188272 | 0.0000255   |

|             |             |             |
|-------------|-------------|-------------|
| 0.00000763  | 0.0000493   | 0.00000568  |
| 0.000000187 | 0.00000576  | 7.53E-08    |
| 0.00000569  | 0.000053    | 0.0000116   |
| 0.0000342   | 0.0000308   | 0.000000442 |
| 0           | 0.00000125  | 5.76E-08    |
| 0           | 0.00000162  | 7.28E-08    |
| 0           | 0.000000294 | 0           |
| 0           | 0.0000013   | 5.63E-08    |
| 0           | 0.00002     | 0.000000612 |
| 0.00000199  | 0.00000261  | 0.000000204 |
| 0.0000348   | 0.000177552 | 0.0000224   |
| 0           | 0.00000124  | 5.05E-08    |
| 0           | 0.0000177   | 0.000000547 |
| 0           | 0.00000126  | 5.04E-08    |
| 0           | 0.0000186   | 0.000000509 |
| 0           | 0.0000172   | 0.000000464 |
| 0.0000364   | 0.0000354   | 0.000000353 |
| 0.0000187   | 0.000127555 | 0.0000155   |
| 0           | 0.000025    | 0           |
| 0           | 0.00000117  | 4.51E-08    |
| 0           | 0.00000117  | 4.51E-08    |
| 0.0000124   | 0.000127555 | 0.0000262   |
| 0.0000124   | 0.000127555 | 0.0000262   |
| 0           | 0.00000129  | 4.88E-08    |
| 0.0000114   | 0.0000823   | 0.0000152   |
| 0           | 0.00000151  | 5.74E-08    |
| 0           | 0.00000151  | 5.74E-08    |
| 0           | 0.000000617 | 0           |
| 0           | 0.000018    | 0.000000053 |
| 0.000000245 | 0.000000685 | 0           |
| 0           | 0.0000204   | 0.000000543 |
| 0.00000262  | 0.0000104   | 0.000000348 |
| 0           | 0.00000144  | 0           |
| 0           | 0.0000177   | 0.000000455 |
| 0.00000422  | 0.0000428   | 0.00000801  |
| 0.0000012   | 0.00000172  | 0.000000131 |
| 0           | 0.0000168   | 0.000000484 |
| 0           | 0.0000179   | 0.000000442 |
| 0           | 0.00000174  | 0.000000062 |
| 0.000000236 | 0.000000661 | 0           |
| 0           | 0.0000176   | 0.000000414 |
| 0.00000148  | 0.0000392   | 0.0000018   |
| 0.0000149   | 0.000108692 | 0.00000724  |
| 0.0000149   | 0.000108692 | 0.00000724  |
| 0.000000508 | 0.0000197   | 0.00000285  |
| 0.000121563 | 0.000490894 | 0           |
| 0           | 0.0000191   | 0.00000049  |

|             |             |             |
|-------------|-------------|-------------|
| 0           | 0.0000191   | 0.00000049  |
| 0.000000308 | 0.000000853 | 0           |
| 0.00000031  | 0.000000719 | 0           |
| 0.00000836  | 0.0000349   | 0.00000198  |
| 0.000000263 | 0.00000079  | 0           |
| 0.000000263 | 0.00000079  | 0           |
| 0           | 0.00000195  | 6.23E-08    |
| 0           | 0.000021    | 0.000000487 |
| 0.00000127  | 0.00000223  | 0.000000173 |
| 0           | 0.0000201   | 0.000000465 |
| 0           | 0.0000177   | 0.000000359 |
| 0           | 0.000000995 | 3.09E-08    |
| 0.000000981 | 0.00000116  | 8.24E-08    |
| 0.000000981 | 0.00000116  | 8.24E-08    |
| 0.000000108 | 0.000000558 | 0           |
| 0.00144349  | 0.00213801  | 0.000148041 |
| 0           | 0.0000201   | 0.000000451 |
| 0.00000164  | 0.00000241  | 0.000000148 |
| 0.00000274  | 0.00000275  | 0           |
| 0           | 0.00000122  | 3.59E-08    |
| 0           | 0.00000122  | 3.59E-08    |
| 0.000000176 | 0.000000659 | 0           |
| 0           | 0.00000644  | 0.000000343 |
| 0.000000097 | 0.00000134  | 0           |
| 0.00000178  | 0.00000274  | 0.00000018  |
| 0.0000023   | 0.00000303  | 0.000000161 |
| 0.000000153 | 0.000000584 | 0           |
| 0.00000195  | 0.00000302  | 0.000000188 |
| 0.000000431 | 0.00000767  | 0.000000302 |
| 0.000000163 | 0.000000762 | 0           |
| 0.0000454   | 0.000159899 | 0.00000553  |
| 0.0000454   | 0.000159899 | 0.00000553  |
| 0.0000019   | 0.00000221  | 0.000000115 |
| 0.0000418   | 0.000157976 | 0.00000586  |
| 8.77E-08    | 0.00000129  | 0           |
| 0           | 0.00000153  | 0           |
| 0           | 0.0000148   | 0.000000289 |
| 0.000000171 | 0.00000063  | 0           |
| 0.000000112 | 0.000000389 | 0           |
| 0.000000236 | 0.000000812 | 0           |
| 0.00000179  | 0.00000273  | 0.000000154 |
| 0.0000015   | 0.00000284  | 0.000000152 |
| 0.000000164 | 0.000000644 | 0           |
| 0.00000156  | 0.00000273  | 0.000000148 |
| 7.13E-08    | 0.00000113  | 0           |
| 0           | 0.0000173   | 0.000000298 |
| 0.00000163  | 0.00000293  | 0.000000162 |

|             |             |             |
|-------------|-------------|-------------|
| 0.00000153  | 0.00000281  | 0.00000014  |
| 0           | 0.0000142   | 0.000000201 |
| 0.00000942  | 0.0000595   | 0.00000408  |
| 0           | 0.00000164  | 0           |
| 0.0000252   | 0.000105333 | 0.00000774  |
| 0           | 0.0000033   | 6.69E-08    |
| 0.000000159 | 0.000000692 | 0           |
| 0.000000219 | 0.000000822 | 0           |
| 0           | 0.0739933   | 0.000764707 |
| 0.00000742  | 0.000102414 | 0.0000255   |
| 0.000000109 | 0.000000682 | 0           |
| 0           | 0.00000133  | 0           |
| 0.000000432 | 0.0000327   | 0.00000223  |
| 0.00000113  | 0.00000293  | 0.000000142 |
| 0.00000196  | 0.0000581   | 0.0000159   |
| 0           | 0.000000575 | 0           |
| 0           | 0.000000535 | 0           |
| 0.00000353  | 0.000096    | 0.00000202  |
| 0.0000222   | 0.000152065 | 0.0000125   |
| 0           | 0.000000498 | 0           |
| 0.00000154  | 0.0000194   | 0.00000274  |
| 0.0000033   | 0.0000577   | 0.0000211   |
| 0           | 0.00000679  | 0           |
| 0.0000012   | 0.0000155   | 0.00000213  |
| 0.00000149  | 0.00000916  | 0           |
| 0.00000654  | 0.0000943   | 0.0000188   |
| 0           | 0.000000645 | 0           |
| 0.0000168   | 0.000144549 | 0.00000578  |
| 0.000000181 | 0.000000617 | 0           |
| 0.000000219 | 0.0000125   | 0.00000112  |
| 0           | 0.000000899 | 0           |
| 0.0000165   | 0.000180853 | 0.0000141   |
| 0           | 0.000000642 | 0           |
| 0.00000474  | 0.0000419   | 0.00000101  |
| 0           | 0.0154167   | 0.0000819   |
| 0.000000223 | 0.0000164   | 0.000000264 |
| 0.000000958 | 0.0000048   | 0.000000376 |
| 0           | 0.000000054 | 0           |
| 0.0000163   | 0.000158334 | 0.00000604  |
| 0.0000118   | 0.000115948 | 0.00000614  |
| 0.000000157 | 0.000000054 | 0           |
| 0.0000033   | 0.000015    | 0.00000274  |
| 0.000000335 | 0.0000119   | 0.000000268 |
| 0           | 0.0000182   | 7.94E-08    |
| 0           | 0.0000322   | 0.000000196 |
| 0           | 0.0000435   | 0.000000254 |
| 0.0000184   | 0.000165656 | 0.00000386  |



|            |             |             |
|------------|-------------|-------------|
| 0.0000142  | 0.000148821 | 0.00000686  |
| 0          | 0.0000396   | 0.000000213 |
| 0          | 0.0000412   | 0.000000259 |
| 0          | 0.0000778   | 0.000000418 |
| 0          | 0.0000436   | 0.000000223 |
| 0.0000146  | 0.000156137 | 0.00000633  |
| 0          | 0.0000726   | 0.000000399 |
| 0          | 0.000038    | 0.000000209 |
| 0          | 0.000000793 | 0           |
| 0          | 0.0000613   | 0.00000023  |
| 0          | 0.000000549 | 0           |
| 0          | 0.00000584  | 0           |
| 0          | 0.0000601   | 0.000000224 |
| 0          | 0.0000138   | 0           |
| 0          | 0.0000419   | 0.000000217 |
| 0          | 0.0000785   | 0.000000374 |
| 0          | 0.0000366   | 0.000000149 |
| 0          | 0.0000433   | 0.00000022  |
| 0.00000112 | 0.00000218  | 0.000000039 |
| 0          | 0.0000265   | 9.97E-08    |
| 0          | 0.0000377   | 0.000000178 |
| 0          | 0.0000696   | 0.000000277 |
| 0          | 0.0000112   | 0           |
| 0.00000104 | 0.00000726  | 0.000000683 |
| 0          | 0.0000645   | 0.000000262 |
| 0          | 0.0000834   | 0.000000312 |
| 0          | 0.0000351   | 0.000000187 |
| 0          | 0.0000875   | 0.000000372 |
| 0.00000529 | 0.000209822 | 0           |
| 0          | 0.0000419   | 0.000000155 |
| 0          | 0.0000711   | 0.000000249 |
| 0          | 0.000114208 | 0.000000399 |
| 0          | 0.000114208 | 0.000000399 |
| 0          | 0.0000979   | 0.000000316 |
| 0          | 0.0000907   | 0.000000275 |
| 0          | 0.0000984   | 0.000000336 |
| 0          | 0.0000338   | 0.000000158 |
| 0          | 0.0000338   | 0.000000158 |
| 0          | 0.0000769   | 0.000000283 |
| 0.00000095 | 0.00000862  | 0.000000822 |
| 0          | 0.0000819   | 0.000000273 |
| 0          | 0.0000704   | 0.000000226 |
| 0          | 0.0000575   | 0.000000184 |
| 0          | 0.0000602   | 0.000000196 |
| 0          | 0.0000602   | 0.000000196 |
| 0          | 0.0000984   | 0.000000305 |
| 0          | 0.0000703   | 0.000000297 |

|             |             |             |
|-------------|-------------|-------------|
| 0           | 0.0000347   | 0.000000138 |
| 0           | 0.0000636   | 0.000000199 |
| 0.000000977 | 0.00000872  | 0.000000695 |
| 0           | 0.000114208 | 0.000000299 |
| 0.00000066  | 0.00000587  | 0.000000051 |
| 0           | 0.000058    | 0.000000142 |
| 0           | 0.0000676   | 0.000000208 |
| 0.000000837 | 0.00000693  | 0.000000662 |
| 0           | 0.0000488   | 0.000000152 |
| 0           | 0.0000488   | 0.000000152 |
| 0.000000105 | 0.00000136  | 0.000000107 |
| 0.000000745 | 0.00000793  | 0.000000689 |
| 0.000000745 | 0.00000793  | 0.000000689 |
| 0           | 0.000033    | 9.25E-08    |
| 0           | 0.000033    | 9.25E-08    |
| 0           | 0.0000366   | 0.000000011 |
| 0           | 0.0000624   | 0.000000183 |
| 0           | 0.0000554   | 0.000000011 |
| 0           | 0.0000624   | 0.000000183 |
| 0           | 0.0000649   | 0.000000278 |
| 0           | 0.0000618   | 0.000000146 |
| 0           | 0.000053    | 0.000000101 |
| 0           | 0.0000478   | 0.000000131 |
| 0           | 0.0000513   | 0.000000114 |
| 0           | 0.0000338   | 0.000000117 |
| 0.00000134  | 0.000014    | 0.000000857 |
| 0           | 0.0000572   | 0.000000014 |
| 0           | 0.000028    | 0.000000122 |
| 0.00000109  | 0.00000972  | 0.000000758 |
| 0           | 0.000052    | 0.000000115 |
| 0.00000012  | 0.0000108   | 0           |
| 0.00000103  | 0.0000103   | 0.000000724 |
| 0.000000884 | 0.00000867  | 0.000000075 |
| 0           | 0.0000667   | 0.000000099 |
| 0           | 0.0000667   | 0.000000099 |
| 0.00111625  | 0.0140039   | 0.000845115 |
| 0           | 0.0000272   | 0.000000068 |
| 0.000000994 | 0.0000104   | 0.000000721 |
| 0           | 0.0000468   | 0.000000121 |
| 0           | 0.00000617  | 0           |
| 0.000000712 | 0.00000858  | 0.000000693 |
| 0           | 0.000051    | 8.87E-08    |
| 0.00000229  | 0.000132055 | 0           |
| 0.000000881 | 0.0000103   | 0.000000703 |
| 0           | 0.0000278   | 6.88E-08    |
| 0           | 0.0000278   | 6.88E-08    |
| 0           | 0.0000408   | 0.000000405 |

|             |             |             |
|-------------|-------------|-------------|
| 0           | 0.0000798   | 0.000000145 |
| 0.000000759 | 0.00000956  | 0.000000604 |
| 0.000000616 | 0.0000179   | 0.000000586 |
| 0           | 0.0000284   | 8.78E-08    |
| 0.000000839 | 0.00000868  | 0.00000046  |
| 0           | 0.0000269   | 8.21E-08    |
| 0           | 0.0000269   | 8.21E-08    |
| 0.000000698 | 0.00000823  | 0.000000571 |
| 0.00000065  | 0.00000744  | 0.000000349 |
| 0.000000707 | 0.00000674  | 0.000000482 |
| 0           | 0.00000467  | 0           |
| 0           | 0.0000303   | 4.85E-08    |
| 0.000000604 | 0.000024    | 0.000000349 |
| 0           | 0.0000663   | 0.000000144 |
| 0.00000061  | 0.00000713  | 0.000000373 |
| 0.000000521 | 0.00000711  | 0.000000441 |
| 0.000000521 | 0.00000711  | 0.000000441 |
| 0           | 0.000042    | 2.99E-08    |
| 0.00000106  | 0.0000962   | 0.000000569 |
| 0           | 0.0000584   | 0.00000006  |
| 0.000000809 | 0.0000673   | 0.000000704 |
| 0.00000046  | 0.0000214   | 0.000000344 |
| 0           | 0.0000587   | 8.08E-08    |
| 0.000000177 | 0.0000263   | 4.44E-08    |
| 0           | 0.0000256   | 0           |
| 0.000000271 | 0.0000119   | 0.000000261 |
| 0.00000364  | 0.000100627 | 0.00000254  |
| 0.000000934 | 0.000113299 | 0.00000114  |
| 0.000000224 | 0.0000838   | 0           |
| 0.000011    | 0.0000493   | 0.00000021  |
| 0.00000787  | 0.0000436   | 0.000000198 |
| 0.00000326  | 0.0000302   | 0.000000138 |
| 0.00341906  | 0.0185837   | 0.0000826   |
| 0.00000353  | 0.000032    | 0.000000144 |
| 0.000000472 | 0.0000602   | 0.00000274  |
| 0.00000904  | 0.0000399   | 0.00000016  |
| 0.00000364  | 0.0000305   | 0.000000131 |
| 0.00000352  | 0.000109968 | 0.00000676  |
| 0.00000176  | 0.0000543   | 0.00000074  |
| 0           | 0.0000152   | 0.000000325 |
| 0.00000337  | 0.0000239   | 0.000000066 |
| 0.00000969  | 0.0000495   | 0.000000149 |
| 0.0000107   | 0.0000521   | 0.000000151 |
| 0.0000107   | 0.0000521   | 0.000000151 |
| 0           | 0.0000122   | 0.000000227 |
| 0           | 0.000024    | 0.000000409 |
| 0           | 0.0000168   | 0.000000245 |

|             |           |             |
|-------------|-----------|-------------|
| 0.000000707 | 0.0000162 | 7.11E-08    |
| 0           | 0.0000112 | 0.000000128 |
| 0           | 0.0000181 | 0.000000132 |

| UNC-patient_Post-FMT1 | UNC-patient_Post-FMT2 | UNC-patient_Post-FMT3 |
|-----------------------|-----------------------|-----------------------|
| 0.0000154             | 0.00000535            | 0.000244369           |
| 0.0000124             | 0.00000508            | 0.000146467           |
| 0.0000149             | 0.00000541            | 0.00021776            |
| 0.0000149             | 0.00000541            | 0.00021776            |
| 0.0000143             | 0.00000499            | 0.000203101           |
| 0.0000111             | 0.00000384            | 0.000179464           |
| 0.0000129             | 0.00000493            | 0.000206115           |
| 0.0000138             | 0.00000498            | 0.00019299            |
| 0.000113447           | 0.000168306           | 0.0000964             |
| 0.0000145             | 0.000005              | 0.000199076           |
| 0.0000142             | 0.00000479            | 0.000189261           |
| 0.0000113             | 0.00000368            | 0.000219994           |
| 0.0000126             | 0.00000409            | 0.000180765           |
| 0.0000148             | 0.00000513            | 0.000194698           |
| 0.00012334            | 0.000179595           | 0.000110925           |
| 0.00876931            | 0.00310579            | 0.139375              |
| 0.0000165             | 0.00000567            | 0.00021974            |
| 0.000154234           | 0.000229607           | 0.0001463             |
| 0.000121739           | 0.000177675           | 0.000108742           |
| 0.000154048           | 0.000226173           | 0.000139357           |
| 0.0000151             | 0.0000051             | 0.000193322           |
| 0.000121622           | 0.000177043           | 0.000106699           |
| 0.000121725           | 0.000177217           | 0.000106813           |
| 0.0000201             | 0.00000725            | 0.000281167           |
| 0.0000129             | 0.00000454            | 0.000194953           |
| 0.0000178             | 0.00000603            | 0.000231162           |
| 0.000122501           | 0.000177042           | 0.00010924            |
| 0.000122501           | 0.000177042           | 0.00010924            |
| 0.0000132             | 0.00000434            | 0.000174173           |
| 0.0000131             | 0.00000453            | 0.000194443           |
| 0.0000184             | 0.0000063             | 0.000240251           |
| 0.0000164             | 0.00000671            | 0.000196067           |
| 0.0000164             | 0.00000671            | 0.000196067           |
| 0.0000132             | 0.00000466            | 0.000196719           |
| 0.000012              | 0.00000421            | 0.000183398           |
| 0.000116656           | 0.000167588           | 0.000103433           |
| 0.0000147             | 0.00000499            | 0.000245993           |
| 0.0000168             | 0.00000564            | 0.000216829           |
| 0.0000168             | 0.00000564            | 0.000216829           |
| 0.0000155             | 0.00000494            | 0.000189876           |
| 0.0000155             | 0.00000494            | 0.000189876           |
| 0.000125573           | 0.000190051           | 0.00011316            |
| 0.0000282             | 0.0000106             | 0.0000208             |
| 0.0000603             | 0.000028              | 0.000048              |
| 0.00011192            | 0.000166109           | 0.000103105           |
| 0.000135038           | 0.000195275           | 0.000117644           |

|             |             |             |
|-------------|-------------|-------------|
| 0.0000459   | 0.0000217   | 0.0000354   |
| 0.000125029 | 0.000177155 | 0.0001104   |
| 0.0000603   | 0.0000272   | 0.0000462   |
| 0.0000335   | 0.0000131   | 0.0000252   |
| 0.000012    | 0.00000386  | 0.000172358 |
| 0.0000233   | 0.000011    | 0.0000176   |
| 0.0000444   | 0.0000194   | 0.0000348   |
| 0.000127029 | 0.000192179 | 0.000121075 |
| 0.0000722   | 0.0000333   | 0.0000518   |
| 0.0000379   | 0.0000165   | 0.000029    |
| 0.0000565   | 0.0000269   | 0.0000443   |
| 0.000154048 | 0.000226173 | 0.000139357 |
| 0.000154048 | 0.000226173 | 0.000139357 |
| 0.0000912   | 0.0000418   | 0.0000698   |
| 0.0000787   | 0.0000372   | 0.0000607   |
| 0.000066    | 0.0000304   | 0.0000516   |
| 0.0000507   | 0.0000238   | 0.0000399   |
| 0.0000441   | 0.0000194   | 0.0000333   |
| 0.000127029 | 0.000192179 | 0.000121075 |
| 0.0000412   | 0.0000181   | 0.0000318   |
| 0.0000536   | 0.0000251   | 0.0000426   |
| 0.0000318   | 0.0000165   | 0.0000279   |
| 0.0000318   | 0.0000165   | 0.0000279   |
| 0.000041    | 0.0000195   | 0.0000324   |
| 0.0000647   | 0.0000302   | 0.000000058 |
| 0.0000647   | 0.0000302   | 0.000000058 |
| 0.0000751   | 0.0000373   | 0.0000623   |
| 0.0000509   | 0.0000248   | 0.0000406   |
| 0.0000512   | 0.0000236   | 0.0000385   |
| 0.000122708 | 0.000057    | 0.0000922   |
| 0.0000503   | 0.0000229   | 0.0000382   |
| 0.0000471   | 0.0000203   | 0.0000348   |
| 0.0000607   | 0.0000271   | 0.0000475   |
| 0.0000546   | 0.0000246   | 0.0000432   |
| 0.0000397   | 0.0000181   | 0.00003     |
| 0.0000872   | 0.0000431   | 0.0000663   |
| 0.14884     | 0.220364    | 0.142569    |
| 0.0000527   | 0.0000221   | 0.00004     |
| 0.0000627   | 0.0000283   | 0.0000476   |
| 0.0000461   | 0.0000226   | 0.0000376   |
| 0.0000589   | 0.0000267   | 0.0000447   |
| 0.0000222   | 0.0000099   | 0.0000167   |
| 0.000057    | 0.0000247   | 0.0000417   |
| 0.0000578   | 0.0000249   | 0.0000429   |
| 0.0000618   | 0.0000289   | 0.0000479   |
| 0.000031    | 0.0000163   | 0.0000274   |
| 0.000031    | 0.0000163   | 0.0000274   |

|             |            |             |
|-------------|------------|-------------|
| 0.0000476   | 0.0000235  | 0.0000381   |
| 0.000048    | 0.0000221  | 0.0000378   |
| 0.0000612   | 0.0000339  | 0.0000515   |
| 0.00007     | 0.0000347  | 0.0000559   |
| 0.0000617   | 0.0000283  | 0.0000477   |
| 0.0000651   | 0.0000294  | 0.0000496   |
| 0.0000459   | 0.0000225  | 0.0000374   |
| 0.0000459   | 0.0000225  | 0.0000374   |
| 0.0000459   | 0.0000225  | 0.0000374   |
| 0.0000628   | 0.0000276  | 0.000047    |
| 0.0000667   | 0.0000293  | 0.00005     |
| 0.0000614   | 0.0000279  | 0.0000476   |
| 0.0000708   | 0.0000367  | 0.0000585   |
| 0.0000619   | 0.0000305  | 0.0000505   |
| 0.000057    | 0.0000263  | 0.000045    |
| 0.0000655   | 0.0000296  | 0.0000497   |
| 0.0000399   | 0.0000244  | 0.0000364   |
| 0.00000664  | 0.00000339 | 0.00000567  |
| 0.00000841  | 0.00000429 | 0.00000718  |
| 0.0000475   | 0.0000222  | 0.0000375   |
| 0.00000969  | 0.00000494 | 0.00000827  |
| 0.0000393   | 0.0000244  | 0.0000362   |
| 0.0000561   | 0.0000247  | 0.0000426   |
| 0.0000544   | 0.0000256  | 0.0000434   |
| 0.0000443   | 0.0000207  | 0.0000345   |
| 0.0000443   | 0.0000207  | 0.0000345   |
| 0.0000448   | 0.000022   | 0.0000365   |
| 0.0000448   | 0.000022   | 0.0000365   |
| 0.0000448   | 0.000022   | 0.0000365   |
| 0.0000448   | 0.000022   | 0.0000365   |
| 0.0000557   | 0.0000285  | 0.0000453   |
| 0.0000561   | 0.0000286  | 0.0000457   |
| 0.0000728   | 0.0000368  | 0.000061    |
| 0.000101174 | 0.0000453  | 0.0000757   |
| 0.0000507   | 0.0000241  | 0.0000406   |
| 0.0000507   | 0.0000241  | 0.0000406   |
| 0.0000558   | 0.0000282  | 0.0000449   |
| 0.0000146   | 0.00001    | 0.000000935 |
| 0.0000779   | 0.0000382  | 0.0000638   |
| 0.0000434   | 0.0000208  | 0.0000365   |
| 0.0000579   | 0.000026   | 0.0000436   |
| 0.0000518   | 0.0000232  | 0.0000398   |
| 0.0000796   | 0.0000385  | 0.0000615   |
| 0.0000498   | 0.0000234  | 0.0000436   |
| 0.0000487   | 0.0000209  | 0.0000371   |
| 0.0000421   | 0.0000176  | 0.00003     |
| 0.0000775   | 0.0000431  | 0.0000688   |

|             |            |             |
|-------------|------------|-------------|
| 0.0000775   | 0.0000431  | 0.0000688   |
| 0.0000491   | 0.0000219  | 0.0000376   |
| 0.0000792   | 0.0000401  | 0.0000624   |
| 0.0000478   | 0.0000213  | 0.0000358   |
| 0.0000635   | 0.0000282  | 0.000047    |
| 0.0000476   | 0.0000212  | 0.0000363   |
| 0.00021564  | 0.0000992  | 0.000166254 |
| 0.0000593   | 0.0000322  | 0.0000503   |
| 0.000101862 | 0.0000481  | 0.0000781   |
| 0.0000444   | 0.0000229  | 0.0000377   |
| 0.0000597   | 0.000027   | 0.0000458   |
| 0.0000862   | 0.000043   | 0.0000692   |
| 0.000052    | 0.0000265  | 0.0000418   |
| 0.0000594   | 0.0000298  | 0.000047    |
| 0.0000678   | 0.0000313  | 0.0000509   |
| 0.0000565   | 0.0000268  | 0.0000436   |
| 0.000058    | 0.000028   | 0.0000456   |
| 0.0000497   | 0.0000243  | 0.0000397   |
| 0.0000497   | 0.0000243  | 0.0000397   |
| 0.0000497   | 0.0000243  | 0.0000397   |
| 0.0000497   | 0.0000243  | 0.0000397   |
| 0.0000623   | 0.0000277  | 0.0000462   |
| 0.0000616   | 0.0000299  | 0.0000496   |
| 0.0000579   | 0.000028   | 0.0000471   |
| 0.0000583   | 0.0000276  | 0.0000448   |
| 0.000100691 | 0.000051   | 0.000083    |
| 0.0000502   | 0.0000252  | 0.0000412   |
| 0.0000503   | 0.0000224  | 0.0000389   |
| 0.0000661   | 0.0000297  | 0.0000499   |
| 0.0000169   | 0.00000882 | 0.0000147   |
| 0.0000355   | 0.0000173  | 0.0000272   |
| 0.0000371   | 0.0000167  | 0.00003     |
| 0.0000363   | 0.0000177  | 0.0000293   |
| 0.0000779   | 0.0000396  | 0.0000641   |
| 0.0000468   | 0.0000209  | 0.0000361   |
| 0.0000421   | 0.0000226  | 0.0000366   |
| 0.0000961   | 0.0000451  | 0.0000733   |
| 0.000101862 | 0.0000481  | 0.0000781   |
| 0.000072    | 0.0000371  | 0.0000622   |
| 0.000072    | 0.0000334  | 0.0000562   |
| 0.000083    | 0.0000431  | 0.0000705   |
| 0.0000424   | 0.0000193  | 0.000034    |
| 0.0000699   | 0.0000319  | 0.0000555   |
| 0.000114563 | 0.0000535  | 0.0000911   |
| 0.00000417  | 0.0000019  | 0.00000322  |
| 0.0000428   | 0.0000214  | 0.0000348   |
| 0.0000454   | 0.0000196  | 0.0000335   |



|             |             |             |
|-------------|-------------|-------------|
| 0.0000468   | 0.0000208   | 0.0000352   |
| 0.0000451   | 0.0000222   | 0.0000367   |
| 0.0000674   | 0.0000308   | 0.0000523   |
| 0.0000407   | 0.0000182   | 0.0000312   |
| 0.0000525   | 0.0000245   | 0.0000427   |
| 0.00000677  | 0.00000309  | 0.00000523  |
| 0.0000626   | 0.0000277   | 0.0000469   |
| 0.0000759   | 0.0000036   | 0.0000611   |
| 0.00000804  | 0.00000367  | 0.00000621  |
| 0.0000328   | 0.0000151   | 0.0000273   |
| 0.0000869   | 0.0000428   | 0.0000704   |
| 0.0000869   | 0.0000428   | 0.0000704   |
| 0.0000656   | 0.0000321   | 0.0000501   |
| 0.0000669   | 0.0000032   | 0.0000502   |
| 0.0000371   | 0.0000167   | 0.0000297   |
| 0.0000254   | 0.0000012   | 0.0000192   |
| 0.0000784   | 0.0000333   | 0.0000591   |
| 0.000033    | 0.0000154   | 0.0000269   |
| 0.0000448   | 0.0000021   | 0.0000335   |
| 0.000033    | 0.0000154   | 0.0000265   |
| 0.0000784   | 0.0000371   | 0.0000629   |
| 0.0000739   | 0.0000357   | 0.0000567   |
| 0.0000348   | 0.0000165   | 0.0000277   |
| 0.00013232  | 0.0000813   | 0.000121824 |
| 0.0000344   | 0.0000162   | 0.0000267   |
| 0.0000578   | 0.0000256   | 0.0000436   |
| 0.0000426   | 0.0000182   | 0.0000339   |
| 0.0000407   | 0.0000171   | 0.0000306   |
| 0.0000506   | 0.0000224   | 0.0000398   |
| 0.0000506   | 0.0000224   | 0.0000398   |
| 0.0000678   | 0.0000295   | 0.0000052   |
| 0.0000678   | 0.0000295   | 0.0000052   |
| 0.0000143   | 0.00000661  | 0.0000111   |
| 0.0000215   | 0.0000109   | 0.0000171   |
| 0.0000215   | 0.0000109   | 0.0000171   |
| 0.0000285   | 0.0000105   | 0.0000454   |
| 0           | 0.000000283 | 0.0000176   |
| 0.0000784   | 0.0000038   | 0.0000631   |
| 0.0000502   | 0.0000252   | 0.0000406   |
| 0.0000331   | 0.0000156   | 0.0000258   |
| 0.155382    | 0.256584    | 0.105269    |
| 0.0000468   | 0.0000221   | 0.0000454   |
| 0.000047    | 0.0000239   | 0.0000419   |
| 0.000106358 | 0.0000055   | 0.0000893   |
| 0.0000194   | 0.00000918  | 0.0000149   |
| 0.225431    | 0.104437    | 0.167793    |
| 0           | 0.000000325 | 0.0000235   |

|             |             |            |
|-------------|-------------|------------|
| 0.0000645   | 0.0000323   | 0.0000512  |
| 0.0000645   | 0.0000323   | 0.0000512  |
| 0.0000624   | 0.0000296   | 0.0000486  |
| 0.0000353   | 0.0000156   | 0.0000286  |
| 0.0000586   | 0.000032    | 0.0000499  |
| 0           | 0.000000321 | 0.0000178  |
| 0.0000586   | 0.0000285   | 0.0000485  |
| 0.0000387   | 0.0000169   | 0.0000297  |
| 0.0000553   | 0.0000268   | 0.0000458  |
| 0           | 0.000000321 | 0.0000174  |
| 0           | 0.000000296 | 0.0000178  |
| 0           | 0.000000153 | 0.0000143  |
| 0.0000442   | 0.0000335   | 0.0000389  |
| 0.0000609   | 0.0000287   | 0.0000472  |
| 0.0000952   | 0.0000472   | 0.0000978  |
| 0.0000575   | 0.0000279   | 0.0000452  |
| 0           | 0.000000362 | 0.0000185  |
| 0.0000204   | 0.00000961  | 0.0000157  |
| 0           | 0.000000131 | 0.0000129  |
| 0           | 0.000000305 | 0.0000228  |
| 0           | 0.000000186 | 0.0000156  |
| 0.0000255   | 0.0000123   | 0.0000187  |
| 0           | 0.000000575 | 0.0000236  |
| 0.0000195   | 0.00000977  | 0.0000158  |
| 0.000036    | 0.000016    | 0.0000281  |
| 0           | 0.00107825  | 0.0145849  |
| 0           | 0.000000374 | 0.0000164  |
| 0           | 0.00000017  | 0.00000418 |
| 0.0000246   | 0.0000118   | 0.0000188  |
| 0           | 0.000000168 | 0.00000452 |
| 0           | 6.13E-08    | 0.00000502 |
| 0           | 0.000000624 | 0.0000243  |
| 0           | 0.000000624 | 0.0000243  |
| 0           | 7.05E-08    | 0.000069   |
| 0.0000454   | 0.0000202   | 0.0000674  |
| 0           | 0.000000164 | 0.00000531 |
| 0           | 0.000000471 | 0.000019   |
| 0           | 0.000000102 | 0.00000445 |
| 0.000248637 | 0.000358303 | 0.0000827  |
| 0           | 0.000000319 | 0.0000166  |
| 0.0000049   | 0.00000227  | 0.00000429 |
| 0           | 0.00000026  | 0.0000173  |
| 0           | 0.000000299 | 0.0000193  |
| 0           | 0.000000299 | 0.0000193  |
| 0.0000705   | 0.0000345   | 0.0000748  |
| 0.0000229   | 0.000011    | 0.0000166  |
| 0.0000229   | 0.000011    | 0.0000166  |

|             |             |             |
|-------------|-------------|-------------|
| 0           | 0.00000326  | 0.0000186   |
| 0.0000215   | 0.00000814  | 0.00000371  |
| 0           | 0.00000309  | 0.000018    |
| 0.0000877   | 0.000054    | 0.0000746   |
| 0           | 0.00000325  | 0.0000178   |
| 0.0000277   | 0.0000131   | 0.0000216   |
| 0           | 0.00000328  | 0.0000171   |
| 0           | 0.00000332  | 0.0000187   |
| 0           | 0.00000183  | 0.00000535  |
| 0           | 0.00000298  | 0.0000185   |
| 0.000118488 | 0.0000542   | 0.0000782   |
| 0           | 0.00000313  | 0.0000183   |
| 0           | 0.00000147  | 0.00000489  |
| 0           | 0.00000322  | 0.0000186   |
| 0.0000245   | 0.0000124   | 0.0000198   |
| 0           | 0.00000104  | 0.00000402  |
| 0           | 0.00000325  | 0.0000183   |
| 0.0001881   | 0.000273539 | 0.000135893 |
| 0           | 0.00000179  | 0.00000438  |
| 0.000051    | 0.000023    | 0.000042    |
| 0.000051    | 0.000023    | 0.000042    |
| 0.0714279   | 0.106044    | 0.0995278   |
| 0           | 0.00000494  | 0.0000201   |
| 0.00000855  | 0.00000463  | 0.00000739  |
| 0           | 8.92E-08    | 0.00000423  |
| 0.0000814   | 0.0000388   | 0.0000944   |
| 0.000140657 | 0.0000819   | 0.000120211 |
| 0           | 0.00000042  | 0.0000249   |
| 0.0168554   | 0.0328678   | 0           |
| 0.000103909 | 0.0000546   | 0.000111573 |
| 0.0000575   | 0.0000302   | 0.000107456 |
| 0           | 0.000000224 | 0.00000625  |
| 0.000107534 | 0.000059    | 0.000126912 |
| 0.0000443   | 0.0000213   | 0.0000805   |
| 0.000114119 | 0.0000664   | 0.000121589 |
| 0.000114119 | 0.0000664   | 0.000121589 |
| 0.000127064 | 0.0000846   | 0.0000931   |
| 0.00000868  | 0.00000473  | 0.00000754  |
| 0.0000801   | 0.0000397   | 0.0000775   |
| 0           | 0.000385014 | 0.00349716  |
| 0.0000259   | 0.0000127   | 0.0000222   |
| 0.000051    | 0.000025    | 0.0000412   |
| 0.00000158  | 0.00000257  | 0.00000279  |
| 0           | 0.000000211 | 0.0000049   |
| 0.0000608   | 0.0000325   | 0.0000525   |
| 0.0000404   | 0.0000363   | 0.0000849   |
| 0.0000471   | 0.0000208   | 0.0000354   |

|             |             |             |
|-------------|-------------|-------------|
| 0.000143292 | 0.0000923   | 0.000165014 |
| 0.000143292 | 0.0000923   | 0.000165014 |
| 0.000143292 | 0.0000923   | 0.000165014 |
| 0.0000226   | 0.0000112   | 0.000019    |
| 0.0000226   | 0.0000112   | 0.000019    |
| 0.0001843   | 0.000210401 | 0.000178863 |
| 0           | 9.19E-08    | 0.00000537  |
| 0           | 0.000000104 | 0.00000486  |
| 0.000122969 | 0.0001891   | 0.000197093 |
| 0.00000461  | 0.00000251  | 0.00000401  |
| 0           | 0.000000212 | 0.00000492  |
| 0           | 0.000000212 | 0.00000492  |
| 0.000146839 | 0.000222071 | 0.000151344 |
| 0.000156874 | 0.000231011 | 0.000235055 |
| 0.000123035 | 0.000177197 | 0.000181992 |
| 0.000120812 | 0.0000737   | 0.000143513 |
| 0.00000159  | 0.00000261  | 0.00000281  |
| 0.000151492 | 0.000230385 | 0.000137584 |
| 0.000107788 | 0.00015968  | 0.000163063 |
| 0.000136521 | 0.0000716   | 0.000126702 |
| 0.0000497   | 0.0000245   | 0.0000402   |
| 0.0000497   | 0.0000245   | 0.0000402   |
| 0.0000497   | 0.0000245   | 0.0000402   |
| 0.0000497   | 0.0000245   | 0.0000402   |
| 0           | 0.000000115 | 0.00000631  |
| 0           | 0.000000135 | 0.00000528  |
| 0.000129485 | 0.000198766 | 0.000200631 |
| 0           | 0.00000014  | 0.00000476  |
| 0.000146677 | 0.000238835 | 0.0000986   |
| 0.0000197   | 0.00000831  | 0.0000149   |
| 0.000126774 | 0.000192747 | 0.000194275 |
| 0.000023    | 0.0000446   | 0.00000028  |
| 0.0000473   | 0.0000191   | 0.0000782   |
| 0.000116831 | 0.000062    | 0.000141533 |
| 0.000150261 | 0.000101561 | 0.000191479 |
| 0.000122654 | 0.000187137 | 0.000188278 |
| 0.000202761 | 0.000333441 | 0.000134556 |
| 0.000179519 | 0.000290649 | 0.000117335 |
| 0.000196414 | 0.000320239 | 0.000128584 |
| 0.00012709  | 0.000219964 | 0.000085    |
| 0.000127909 | 0.000217763 | 0.0000856   |
| 0.0000766   | 0.0000359   | 0.000214635 |
| 0.000199615 | 0.000327936 | 0.000132314 |
| 0.00011472  | 0.000192981 | 0.0000758   |
| 0           | 0.00287317  | 0.00237338  |
| 0.000215785 | 0.000353341 | 0.000137993 |
| 0.000118338 | 0.000202685 | 0.0000775   |

|             |             |             |
|-------------|-------------|-------------|
| 0.000129919 | 0.000221924 | 0.000086    |
| 0           | 0.000023    | 0.000000542 |
| 0.000112348 | 0.0000531   | 0.000111784 |
| 0.000140371 | 0.000239561 | 0.0000923   |
| 0.000164382 | 0.000266523 | 0.000109996 |
| 0.000128691 | 0.000222061 | 0.0000858   |
| 0.000198804 | 0.00032305  | 0.000130009 |
| 0.000125702 | 0.000218508 | 0.0000836   |
| 0.0000959   | 0.000049    | 0.000318221 |
| 0.0000959   | 0.000049    | 0.000318221 |
| 0.000152594 | 0.000249112 | 0.000102918 |
| 0.000196898 | 0.000324051 | 0.000128845 |
| 0.000127254 | 0.000191888 | 0.000197206 |
| 0.000146169 | 0.000243826 | 0.0000973   |
| 0.000000157 | 0.000000212 | 0.000000119 |
| 0.000154181 | 0.000256869 | 0.000101958 |
| 0.000208886 | 0.000341442 | 0.000137904 |
| 0.0000271   | 0.0000525   | 0           |
| 0.000142698 | 0.000238037 | 0.0000952   |
| 0.000182088 | 0.000293786 | 0.000120832 |
| 0.000176389 | 0.000292116 | 0.000112956 |
| 0.000177783 | 0.000296592 | 0.000114472 |
| 0.000198643 | 0.000329408 | 0.000132821 |
| 0.000132325 | 0.000226216 | 0.0000872   |
| 0.000196764 | 0.000321504 | 0.000130457 |
| 0.000132942 | 0.000226113 | 0.0000875   |
| 0.000179287 | 0.000297804 | 0.000114472 |
| 0.000209112 | 0.000340659 | 0.000138054 |
| 0.000122553 | 0.000212485 | 0.0000807   |
| 2.76E-08    | 9.14E-08    | 0.000000716 |
| 0.000146402 | 0.000219095 | 0.000223495 |
| 0.000213545 | 0.000349554 | 0.000142808 |
| 0.000213545 | 0.000349554 | 0.000142808 |
| 0.000203716 | 0.000337089 | 0.000131907 |
| 0.000104219 | 0.0000496   | 0.000251789 |
| 0.0000585   | 0.00010384  | 0.000000108 |
| 0.0000585   | 0.00010384  | 0.000000108 |
| 0.000135203 | 0.000226468 | 0.0000899   |
| 0.000135203 | 0.000226468 | 0.0000899   |
| 0           | 0.000000654 | 0.000000559 |
| 0.000208398 | 0.000342772 | 0.000134581 |
| 0.000208398 | 0.000342772 | 0.000134581 |
| 0.000201807 | 0.000326428 | 0.000132553 |
| 0.000152043 | 0.00014812  | 0.000128618 |
| 0.000163602 | 0.000266338 | 0.000106685 |
| 0.000105022 | 0.000195268 | 0           |
| 0.0000002   | 0.000000401 | 0.00000012  |

|             |             |             |
|-------------|-------------|-------------|
| 0.000000281 | 0.000000222 | 0.000000183 |
| 0.000000202 | 0.000000212 | 0.000000207 |
| 0.0000256   | 0.0000283   | 0.00000457  |
| 0.0000548   | 0.0000241   | 0.0000401   |
| 0.000000187 | 0.000000172 | 0.000000102 |
| 0           | 0.000000158 | 0.0000561   |
| 0.0000257   | 0.0000148   | 0.0000964   |
| 0.000000295 | 0.000000307 | 0.00000017  |
| 0           | 0.00000187  | 0.000000271 |
| 0.000227115 | 0.000226659 | 0.000219894 |
| 0.000000378 | 0.00000077  | 0.000000677 |
| 0.0000244   | 0.0000356   | 0.00000588  |
| 0.000000392 | 0.0000015   | 0.00000111  |
| 0.0000218   | 0.0000106   | 0.0000169   |
| 0.000522374 | 0.000807901 | 0.000224602 |
| 0.000000618 | 0.0000014   | 0.000000919 |
| 0.0000333   | 0.0000166   | 0.000026    |
| 0.0000237   | 0.0000116   | 0.0000184   |
| 0.000128663 | 0.000129388 | 0.000156764 |
| 0.000000223 | 0.000000317 | 0.000000213 |
| 0.000000388 | 0.000000762 | 0.000000684 |
| 0.000000394 | 0.00000084  | 0.000000681 |
| 0.000000385 | 0.000000403 | 0.000000215 |
| 0           | 4.69E-08    | 0           |
| 0.000000299 | 0.00000111  | 0.000000893 |
| 0.000000745 | 0.00000127  | 0.000000885 |
| 0.0000309   | 0.0000162   | 0.0000247   |
| 0.00000105  | 0.00000159  | 0.00000105  |
| 0.000000247 | 0.000000308 | 0.000000246 |
| 0.000000247 | 0.000000308 | 0.000000246 |
| 0.000000375 | 0.000000837 | 0.000000861 |
| 0.00016143  | 0.00013936  | 0.000170471 |
| 0.000000283 | 0.000000273 | 0.000000298 |
| 0.000000207 | 0.000000411 | 0.000000204 |
| 0           | 0           | 0           |
| 0.000000249 | 0.000000436 | 0.000000218 |
| 0.000170608 | 0.0000935   | 0.000134499 |
| 0.0000353   | 0.0000208   | 0.000124842 |
| 0.0000781   | 0.000051    | 0.0000552   |
| 0.000120341 | 0.0000642   | 0.000146837 |
| 0.0000331   | 0.0000159   | 0.0000256   |
| 0.000642433 | 0.00132315  | 0.00192224  |
| 0.0000154   | 0.00000783  | 0.0000129   |
| 0.00000547  | 0.00001     | 0           |
| 0.0000539   | 0.0000268   | 0.0000433   |
| 0.0000984   | 0.0000542   | 0.000187629 |
| 0           | 0           | 0           |

|             |             |             |
|-------------|-------------|-------------|
| 0.00000649  | 0.00000331  | 0.00000548  |
| 0.0000319   | 0.0000341   | 0.0000782   |
| 0.000122928 | 0.0000688   | 0.000105838 |
| 0.00004     | 0.0000169   | 0.0000951   |
| 0.0000466   | 0.0000231   | 0.0000375   |
| 0           | 0.000000198 | 0.000000106 |
| 0.000163609 | 0.000113777 | 0.000282701 |
| 0.000163609 | 0.000113777 | 0.000282701 |
| 0.000163609 | 0.000113777 | 0.000282701 |
| 0           | 0           | 0           |
| 0           | 0.000000706 | 0.000000522 |
| 0.0000893   | 0.0000406   | 0.000089    |
| 0.000089    | 0.0000419   | 0.000064    |
| 0.0000319   | 0.0000135   | 0.0000228   |
| 0.0000588   | 0.0000268   | 0.0000464   |
| 0           | 7.99E-08    | 0.0000691   |
| 0.000133952 | 0.0000781   | 0.000115791 |
| 0.0000998   | 0.0000511   | 0.0003391   |
| 0.0000292   | 0.0000123   | 0.0000208   |
| 0.0000837   | 0.0000373   | 0.0000916   |
| 0           | 0.000000717 | 0.000000921 |
| 0.000143612 | 0.0000868   | 0.000124577 |
| 0           | 0.000000215 | 0.000000131 |
| 0           | 0           | 0           |
| 0           | 0           | 0           |
| 2.76E-08    | 9.14E-08    | 5.74E-08    |
| 0           | 0           | 0           |
| 0           | 0.000000114 | 0.0000542   |
| 0.0000294   | 0.0000129   | 0.0000214   |
| 0           | 0.000000103 | 0.0000592   |
| 0           | 0           | 0           |
| 0           | 0.00159056  | 0.000141672 |
| 0.00000276  | 0.0000034   | 0.00000154  |
| 0           | 8.88E-08    | 0.0000566   |
| 0           | 8.88E-08    | 0.0000566   |
| 0           | 4.18E-08    | 0           |
| 0           | 9.39E-08    | 0.0000605   |
| 0           | 0           | 0           |
| 0.000180965 | 0.000107255 | 0.000180338 |
| 0           | 0.000000103 | 0.0000589   |
| 0           | 0.000000154 | 0.000067    |
| 0           | 0.000000162 | 0.0000588   |
| 0           | 0           | 0           |
| 0           | 0.000000403 | 0.000000359 |
| 0           | 0.000000327 | 0.000000164 |
| 0           | 0.000000327 | 0.000000164 |
| 0           | 9.58E-08    | 0.0000572   |

|             |             |             |
|-------------|-------------|-------------|
| 0.000121392 | 0.0000687   | 0.000103245 |
| 0           | 0           | 0.0000542   |
| 0           | 0.000000814 | 0.00000026  |
| 0           | 0.000000382 | 0.000000458 |
| 0           | 0.000000259 | 0.000000256 |
| 0           | 0.000000401 | 0.000000469 |
| 0           | 0.000000217 | 0.0000636   |
| 0.000113928 | 0.0000688   | 0.000227093 |
| 0           | 0.00000127  | 0.000000297 |
| 0           | 0           | 0.0000538   |
| 0.0000168   | 0.00000862  | 0.0000147   |
| 0           | 9.06E-08    | 0.0000544   |
| 0           | 0.00000063  | 0.00000032  |
| 0           | 0.000000136 | 0.000000149 |
| 0           | 0.000000148 | 0.0000624   |
| 0.0000176   | 0.00000809  | 0.0000156   |
| 0.000248957 | 0.000159515 | 0.000323326 |
| 0.000248929 | 0.000159511 | 0.000323303 |
| 0.000104488 | 0.0000553   | 0.0000949   |
| 0           | 0.000000141 | 0.0000543   |
| 0           | 0.000000141 | 0.0000543   |
| 0           | 0.000000339 | 0.000000387 |
| 0           | 0.000000124 | 0.0000618   |
| 0           | 0.0000605   | 0.0365693   |
| 0           | 9.13E-08    | 0.0000538   |
| 0.0000637   | 0.0000636   | 0.0001273   |
| 0.00000328  | 0.0000037   | 0.00000202  |
| 0           | 0.000000112 | 0.0000572   |
| 0           | 0.000000235 | 0.000000232 |
| 0           | 0.000000171 | 0.000000211 |
| 0           | 0.000000203 | 0.000000176 |
| 0.0000521   | 0.0000457   | 0.000120327 |
| 0           | 0           | 0           |
| 0           | 0.000000258 | 0.000000164 |
| 0           | 0.000000535 | 0.000000299 |
| 0           | 0.000000226 | 0.000000146 |
| 0           | 0.000000104 | 0.0000564   |
| 0           | 0.000000245 | 0.000000158 |
| 0           | 0           | 0.000000662 |
| 0           | 8.83E-08    | 0.0000579   |
| 0.000143292 | 0.0000923   | 0.000216617 |
| 0           | 0.000000208 | 0.000000165 |
| 0           | 8.09E-08    | 0           |
| 0           | 0.000000189 | 0.00000019  |
| 0           | 0.000000159 | 0.0000542   |
| 0           | 8.46E-08    | 0           |
| 0           | 0.00000022  | 0.000000155 |



|             |             |             |
|-------------|-------------|-------------|
| 0           | 0.000000117 | 0.000054    |
| 0           | 0.000000368 | 0.00000037  |
| 0           | 0.000000368 | 0.00000037  |
| 0.000102194 | 0.0000492   | 0.000112061 |
| 0           | 6.83E-08    | 0           |
| 0.000018    | 0.00000209  | 0.00000182  |
| 0           | 0.000000165 | 0.0000633   |
| 0.0000671   | 0.0000295   | 0.00006     |
| 0           | 0.000000152 | 0.0000813   |
| 0           | 9.13E-08    | 0           |
| 0.00000954  | 0.00000856  | 0.00000584  |
| 0           | 0           | 5.38E-08    |
| 0           | 0.000000279 | 0.000000195 |
| 0.00023868  | 0.000133849 | 0.000198105 |
| 0           | 6.78E-08    | 0.0000474   |
| 0.000236964 | 0.000127425 | 0.000196453 |
| 0.00000744  | 0.00000786  | 0.0000584   |
| 0.000000654 | 0           | 0.00000112  |
| 0           | 0.000000231 | 0.000000198 |
| 0.000000128 | 0.000000232 | 0.000000317 |
| 0           | 0.000000139 | 0.000000213 |
| 0           | 0.000000175 | 0.000000202 |
| 0.0000616   | 0.0000336   | 0.0000573   |
| 0.000151821 | 0.0000771   | 0.000329931 |
| 0.000208803 | 0.000104968 | 0.000187811 |
| 0.000261193 | 0.000295993 | 0.000394766 |
| 0.000000857 | 0           | 0.00000131  |
| 0.000215718 | 0.000121351 | 0.00038162  |
| 0.000642618 | 0.000937189 | 0.000644794 |
| 0.000124149 | 0.0000664   | 0           |
| 0           | 0           | 0.000000241 |
| 0           | 0.000000124 | 0           |
| 0           | 0.000000124 | 0           |
| 0           | 0           | 0.000000068 |
| 0.00006     | 0.000029    | 0.0000487   |
| 0           | 0.0000136   | 0.00000527  |
| 0           | 9.17E-08    | 0           |
| 0           | 7.14E-08    | 0           |
| 0           | 6.61E-08    | 0           |
| 0           | 7.27E-08    | 0           |
| 0           | 0           | 0.000000151 |
| 0.000155823 | 0.0000796   | 0.000127718 |
| 0.00000462  | 0.00000413  | 0.00000169  |
| 0           | 0           | 0.000000221 |
| 0.000429443 | 0.000506167 | 0.000537687 |
| 0           | 6.82E-08    | 0           |
| 0           | 0           | 0           |

|             |             |             |
|-------------|-------------|-------------|
| 0           | 0.000000161 | 0.00000436  |
| 0           | 0           | 0           |
| 0.000192707 | 0.000110752 | 0.000178642 |
| 0           | 0.0000676   | 0           |
| 0.000156693 | 0.0000839   | 0.000147126 |
| 0           | 0           | 9.41E-08    |
| 0.000000254 | 0.000000876 | 0.00000179  |
| 0           | 5.06E-08    | 0           |
| 0           | 0           | 9.07E-08    |
| 0           | 6.46E-08    | 0           |
| 0           | 6.46E-08    | 0           |
| 0           | 0           | 6.06E-08    |
| 0           | 0           | 6.06E-08    |
| 0.000193966 | 0.00018303  | 0.000201979 |
| 0           | 5.22E-08    | 0           |
| 0           | 0           | 0.000000241 |
| 0           | 7.39E-08    | 0           |
| 0           | 0           | 0.000000121 |
| 0.00000271  | 0.00000238  | 0.00000401  |
| 0.00000426  | 0.0000032   | 0.00000141  |
| 0.00000382  | 0.00000411  | 0.0000367   |
| 0           | 0           | 0.000000181 |
| 0.0000311   | 0.0000119   | 0.000006    |
| 0.000123934 | 0.0000623   | 0.000103928 |
| 0.000138005 | 0.000077    | 0.000133241 |
| 0           | 0.000000145 | 0.00000471  |
| 0.000121483 | 0.0000646   | 0.000259404 |
| 0.000000247 | 0.000000646 | 0.00000193  |
| 0.000000805 | 0.00000123  | 0.00000705  |
| 2.64E-08    | 0           | 0.00000116  |
| 0           | 0.000000973 | 0           |
| 0           | 0.000000973 | 0           |
| 0           | 0           | 0.000000141 |
| 0.0000718   | 0.000035    | 0.0000775   |
| 0.000232476 | 0.00035762  | 0.000368104 |
| 0           | 6.11E-08    | 0           |
| 0.00032105  | 0.000362563 | 0.00036116  |
| 0           | 0           | 0           |
| 0.000288895 | 0.000416136 | 0.000454916 |
| 0.00031447  | 0.000189321 | 0.000315201 |
| 0           | 0           | 8.07E-08    |
| 0.00031749  | 0.000483534 | 0.000485118 |
| 0.00000121  | 0.000000682 | 0.00000284  |
| 0.000367813 | 0.000545667 | 0.000538496 |
| 0.000275887 | 0.00017263  | 0.00032721  |
| 0.0003286   | 0.000490812 | 0.000497484 |
| 0.000259319 | 0.000391765 | 0.000422629 |

|             |             |             |
|-------------|-------------|-------------|
| 0.000259319 | 0.000391765 | 0.000422629 |
| 0.0000025   | 0.00000151  | 0.00000532  |
| 0.0000025   | 0.00000151  | 0.00000532  |
| 0.0000801   | 0.00004     | 0.000121593 |
| 0.000000127 | 0.000000524 | 0.00000139  |
| 0.000000388 | 0.000000487 | 0.00000113  |
| 0.000341551 | 0.000535147 | 0.000275542 |
| 0.000122175 | 0.0000637   | 0.000123773 |
| 0           | 4.97E-08    | 0           |
| 0.00021072  | 0.000128838 | 0.000196904 |
| 0.00011595  | 0.0000692   | 0.000106113 |
| 0.00000547  | 0.00000608  | 0.00000697  |
| 0.000376327 | 0.000552305 | 0.000390761 |
| 0.000000781 | 0.00000247  | 0.0000813   |
| 0.0000261   | 0.0000144   | 0.0000388   |
| 0.00000115  | 0.000000294 | 0.000000907 |
| 0.0000246   | 0.00000827  | 0.0000935   |
| 0.000283326 | 0.000356991 | 0.000271633 |
| 0.000306844 | 0.000424656 | 0.000471674 |
| 0.00000115  | 0.000000294 | 0.000000907 |
| 0.00000115  | 0.000000294 | 0.000000907 |
| 0.000308042 | 0.000378782 | 0.000369687 |
| 0.000398979 | 0.000612759 | 0.000596883 |
| 0.000126918 | 0.000130887 | 0.000173122 |
| 0.000138921 | 0.000158374 | 0.000176943 |
| 0           | 0.00000207  | 0.000000727 |
| 0.00029071  | 0.000388451 | 0.000273601 |
| 0.0000354   | 0.0000633   | 0.00000618  |
| 0.000383465 | 0.000566653 | 0.000517177 |
| 0.000311081 | 0.000428093 | 0.000288782 |
| 0.00000846  | 0.00000181  | 0.00000297  |
| 0.000477901 | 0.00073553  | 0.0006819   |
| 0.00000519  | 0.00000161  | 0.00000405  |
| 0           | 0.000000429 | 0           |
| 0.00000727  | 0.00000274  | 0.00000679  |
| 0.000000784 | 0.00000186  | 0.00000198  |
| 0.00000163  | 0.00000142  | 0.00000727  |
| 0.00000086  | 0.00000185  | 0.00000214  |
| 0.000000243 | 0.000000643 | 0.00000251  |
| 0.000000243 | 0.000000643 | 0.00000251  |
| 0.00000109  | 0.00000238  | 0.00000206  |
| 0.000290049 | 0.000451379 | 0.00059092  |
| 0           | 0.000000428 | 0           |
| 0           | 0.000000541 | 0           |
| 0           | 0.000000047 | 0           |
| 0           | 0.000362831 | 0           |
| 0.00000115  | 0.00000267  | 0.0000021   |

|             |             |             |
|-------------|-------------|-------------|
| 0.000378713 | 0.000476782 | 0.000515173 |
| 0.0000859   | 0.0000532   | 0.0000918   |
| 0.000491325 | 0.000755713 | 0.000576538 |
| 0.00000125  | 0.00000294  | 0.00000213  |
| 0           | 0.000000306 | 0           |
| 0           | 0.000000415 | 0           |
| 0           | 0.000000628 | 0           |
| 0.000000378 | 0.000000344 | 0.000000967 |
| 0           | 0.0000001   | 0.000000694 |
| 0.000316652 | 0.000506153 | 0.000204184 |
| 0.000115766 | 0.000104208 | 0.00018276  |
| 0           | 0.000000353 | 0           |
| 0.000000975 | 0.00000238  | 0.0000019   |
| 0           | 0           | 0           |
| 0.000174636 | 0.000140746 | 0.000192803 |
| 0.000254414 | 0.000353138 | 0.000285867 |
| 0.000370332 | 0.000466321 | 0.000511867 |
| 0           | 0.000000604 | 0           |
| 0.0000781   | 0.0000345   | 0.0000591   |
| 0.000298831 | 0.000444896 | 0.000426165 |
| 0.000000115 | 0.000000208 | 0.000000155 |
| 0           | 0           | 0           |
| 0.000213104 | 0.000185538 | 0.000243199 |
| 0           | 0.000000568 | 0           |
| 0.000376332 | 0.000560714 | 0.000390761 |
| 0.000366013 | 0.000541032 | 0.000360554 |
| 0.000101207 | 0.0000544   | 0.0000898   |
| 0.000000959 | 0.000000622 | 0.00000211  |
| 0.00030586  | 0.000405259 | 0.00052564  |
| 0           | 0.000000455 | 0           |
| 0           | 0           | 0.00000162  |
| 0.000000222 | 0.000000118 | 0.000000115 |
| 0           | 0           | 0.000000515 |
| 0           | 0.00000042  | 0           |
| 0.00000121  | 0.00000272  | 0.00000205  |
| 0           | 0           | 0.000000763 |
| 0.000155895 | 0.0000901   | 0.000148795 |
| 0.0000164   | 0.0000524   | 0           |
| 0.000000938 | 0.00000118  | 0.000000747 |
| 0           | 0           | 0.000000116 |
| 0.0000847   | 0.000109918 | 0.0000421   |
| 0           | 0.00000028  | 0           |
| 0.00060288  | 0.000837119 | 0.000701217 |
| 0.0000739   | 0.0000342   | 0.000059    |
| 0           | 0.000000396 | 0           |
| 0.0000269   | 0.0000448   | 0.00000798  |
| 0.0000269   | 0.0000448   | 0.00000798  |

|             |             |             |
|-------------|-------------|-------------|
| 0.0172544   | 0.0482583   | 0           |
| 0.0000153   | 0.0000515   | 0           |
| 0.000000825 | 0.000000693 | 0.00000132  |
| 0.000272513 | 0.000152403 | 0.000542496 |
| 0           | 0.000000488 | 0.000000398 |
| 0.000360745 | 0.000502237 | 0.000580306 |
| 0.00000967  | 0.00000433  | 0.00000823  |
| 0.000165838 | 0.00012241  | 0.000204319 |
| 0.000100221 | 0.0000506   | 0.000144416 |
| 0.00000968  | 0.00000762  | 0.00016173  |
| 0.000220989 | 0.000113584 | 0.000205212 |
| 0.000124    | 0.000063    | 0.000131553 |
| 0           | 0           | 0           |
| 0.0000134   | 0.0000529   | 0           |
| 0.000180845 | 0.000261976 | 0.000156618 |
| 0           | 8.48E-08    | 0           |
| 0.0000169   | 0.000056    | 0           |
| 0.0000169   | 0.000056    | 0           |
| 0.0000434   | 0.0000208   | 0.0000365   |
| 0           | 0.0000003   | 0.000000992 |
| 0.0000534   | 0.0000262   | 0.000106971 |
| 0.0000011   | 0.00000226  | 0           |
| 0           | 0           | 0           |
| 0.00000112  | 7.22E-08    | 0.00000108  |
| 0.000525705 | 0.000704986 | 0.000568748 |
| 0.000000193 | 0.00000013  | 0.00000131  |
| 0.00000488  | 0.00000263  | 0.00000497  |
| 0.00039151  | 0.00059236  | 0.000441263 |
| 0           | 0           | 0.000000193 |
| 0.000804766 | 0.00121769  | 0.000987015 |
| 0.00000806  | 0.00000364  | 0.00000694  |
| 0.73728     | 0.727023    | 0.731499    |
| 0           | 0           | 0           |
| 0.000000187 | 0           | 3.46E-08    |
| 0.00000116  | 0.000000752 | 0.000000811 |
| 0.000525123 | 0.000745681 | 0.000711206 |
| 0.00013862  | 0.0000699   | 0.000344526 |
| 0           | 5.27E-08    | 0           |
| 0.000045    | 0.0000178   | 0.0000458   |
| 0.000000296 | 0           | 0.000000649 |
| 0           | 0           | 0           |
| 0           | 0           | 0           |
| 0.000119071 | 0.0000647   | 0.000166914 |
| 0.00000445  | 0.00000346  | 0.00000654  |
| 0.000000337 | 0.000000237 | 0.00000181  |
| 0.0000282   | 0.0000113   | 0.00000679  |
| 0.0000956   | 0.0000489   | 0.0000813   |

|             |             |             |
|-------------|-------------|-------------|
| 0           | 0           | 0.000000175 |
| 0.000503237 | 0.000740909 | 0.000527965 |
| 0.0000136   | 0.0000501   | 0           |
| 0           | 0           | 0           |
| 0           | 0           | 0           |
| 0           | 0           | 0           |
| 0.000000265 | 0           | 0.000000176 |
| 0.000000324 | 0           | 0.000000107 |
| 0.000000253 | 0           | 0.000000173 |
| 0.0000108   | 0.0000418   | 0           |
| 0.000131139 | 0.0000724   | 0.000151331 |
| 0           | 0           | 0           |
| 0.00000602  | 0.00000825  | 0.00000258  |
| 0.0000053   | 0.00000487  | 0.00000669  |
| 0.00016744  | 0.000273998 | 0.0000297   |
| 0.00000982  | 0.00000321  | 0.00000778  |
| 0.000625102 | 0.000867859 | 0.000751718 |
| 0           | 0           | 0           |
| 0.0000073   | 0.0000101   | 0.00000226  |
| 0.00000902  | 0.00000246  | 0           |
| 0           | 0           | 0.000000675 |
| 0.000000154 | 0.00000034  | 0.00000182  |
| 0.000000154 | 0.00000034  | 0.00000182  |
| 0.000000154 | 0.00000034  | 0.00000182  |
| 0.00038301  | 0.000564264 | 0.00044991  |
| 0.000505776 | 0.00072095  | 0.000689641 |
| 0           | 0           | 0           |
| 0.00000893  | 0.00000228  | 0           |
| 0.0000104   | 0.00000802  | 0           |
| 0.00000807  | 0.0000026   | 0           |
| 0.0000132   | 0.0000535   | 0           |
| 0.00000878  | 0.00000249  | 0           |
| 0.00000786  | 0.0000296   | 0           |
| 0.000291772 | 0.000375408 | 0.000372657 |
| 0.0000102   | 0.0000368   | 0           |
| 0           | 0           | 0           |
| 0.00000927  | 0.0000376   | 0           |
| 0.00000937  | 0.0000379   | 0           |
| 0.00000937  | 0.0000379   | 0           |
| 0           | 9.68E-08    | 0           |
| 0.000526356 | 0.000756967 | 0.000713252 |
| 0.000509319 | 0.000723799 | 0.000693315 |
| 0.000313124 | 0           | 0.000244851 |
| 0.00000951  | 0.00000288  | 0           |
| 0           | 2.13E-08    | 0           |
| 0           | 2.13E-08    | 0           |
| 0           | 0           | 0           |









|             |            |             |
|-------------|------------|-------------|
| 0           | 0          | 0           |
| 0           | 0          | 0           |
| 0           | 0          | 0           |
| 0           | 0          | 0           |
| 0           | 0          | 0           |
| 0           | 0          | 0           |
| 0           | 0          | 0           |
| 0           | 0.00406381 | 0           |
| 0           | 0          | 0.000207189 |
| 0           | 0          | 0           |
| 0           | 0          | 0           |
| 0           | 0          | 0           |
| 0           | 0          | 0           |
| 0           | 0          | 0           |
| 0           | 0          | 0           |
| 0           | 0          | 0           |
| 0           | 0          | 0           |
| 0           | 0          | 0           |
| 0           | 0          | 0           |
| 0           | 0          | 0           |
| 0           | 0          | 0           |
| 0           | 0          | 0           |
| 0           | 0          | 0           |
| 0           | 0          | 0           |
| 0           | 0          | 0           |
| 0           | 0          | 0           |
| 0           | 0          | 0.000127036 |
| 0           | 0          | 0           |
| 0           | 0          | 0           |
| 0           | 0          | 0           |
| 0           | 0          | 0           |
| 0           | 0          | 0           |
| 0           | 0          | 0           |
| 0           | 0          | 0           |
| 0           | 0          | 0           |
| 0           | 0          | 0           |
| 0           | 0          | 0           |
| 0           | 0          | 0           |
| 0           | 0          | 0           |
| 0           | 0          | 0           |
| 0           | 0          | 0           |
| 0           | 0          | 0           |
| 0           | 0          | 0           |
| 0.000664364 | 0          | 0           |
| 0           | 0          | 0           |
| 0           | 0          | 0           |
| 0.000537335 | 0          | 0           |
| 0           | 0          | 0.00298744  |
| 0           | 0          | 0           |
| 0           | 0          | 0           |
| 0           | 0          | 0           |











|             |             |             |
|-------------|-------------|-------------|
| 0           | 0           | 0           |
| 0           | 0           | 0           |
| 0           | 0           | 0           |
| 0           | 0           | 0           |
| 0           | 0           | 0           |
| 0.000000145 | 0           | 0.000000113 |
| 0           | 0           | 0           |
| 0           | 0           | 0           |
| 0           | 0           | 0           |
| 0           | 0           | 0           |
| 0           | 0           | 0           |
| 0           | 0           | 0           |
| 0           | 0           | 0           |
| 0           | 0           | 0           |
| 0           | 0           | 0           |
| 0           | 0           | 0           |
| 0           | 0           | 0.0000313   |
| 0           | 7.27E-08    | 0           |
| 0           | 0           | 0           |
| 0           | 0           | 0           |
| 0           | 0           | 4.96E-08    |
| 0           | 0           | 0           |
| 0           | 0           | 0           |
| 0           | 0           | 0           |
| 0           | 0           | 0           |
| 0           | 0           | 0           |
| 0           | 0           | 0           |
| 0           | 0           | 0           |
| 0           | 0           | 0           |
| 0           | 0.000000291 | 0           |
| 0           | 0           | 0           |
| 0           | 0           | 0           |
| 0           | 0           | 0           |
| 0           | 0           | 0           |
| 0           | 0           | 0           |
| 0           | 0           | 0           |
| 0           | 0           | 0           |
| 0           | 0           | 0           |
| 0           | 0           | 0           |
| 0           | 0           | 0           |
| 0           | 0           | 0           |
| 0           | 0           | 0           |
| 0           | 0           | 0           |
| 0           | 0           | 0           |
| 0           | 0           | 0           |
| 0           | 0           | 0           |
| 0           | 0           | 0           |
| 0           | 0           | 0           |
| 0           | 0           | 0.000000247 |
| 0           | 0           | 0           |
| 0           | 0           | 0           |
| 0           | 0           | 0           |



|             |             |             |
|-------------|-------------|-------------|
| 0           | 0           | 0           |
| 0           | 0.000000452 | 0           |
| 0           | 0           | 0           |
| 0           | 0           | 0           |
| 0           | 0           | 0           |
| 0           | 0           | 0           |
| 0           | 0           | 0           |
| 0.000000325 | 0           | 0           |
| 0           | 0           | 0           |
| 0.000000324 | 0           | 0           |
| 0           | 0           | 0.00000309  |
| 0           | 0           | 0           |
| 0           | 0           | 0           |
| 0           | 0           | 0           |
| 0           | 0           | 0           |
| 0           | 0           | 0           |
| 0           | 0           | 0           |
| 0           | 0           | 0           |
| 0           | 0           | 0           |
| 0           | 0           | 0           |
| 0.00000647  | 0.00000215  | 0.000018    |
| 0           | 0           | 0           |
| 0           | 0           | 0           |
| 0           | 0           | 0           |
| 0           | 0           | 0           |
| 0           | 0           | 0           |
| 0           | 0           | 0           |
| 0           | 0           | 0           |
| 0           | 0           | 0           |
| 0           | 0           | 0           |
| 0           | 0           | 0           |
| 0           | 0           | 0           |
| 0           | 0           | 0           |
| 0           | 0           | 0           |
| 0           | 0           | 0.000000182 |
| 0           | 0           | 0           |
| 0           | 0           | 0           |
| 0.000000265 | 0           | 0           |
| 0.000000208 | 0           | 0           |
| 0           | 0           | 0.00000305  |
| 0           | 0           | 0           |
| 0           | 0           | 0           |
| 0           | 0           | 0           |
| 0           | 0           | 0           |
| 0           | 0           | 0           |



|            |   |             |
|------------|---|-------------|
| 0          | 0 | 0           |
| 0          | 0 | 0           |
| 0          | 0 | 0           |
| 0          | 0 | 0           |
| 0          | 0 | 0           |
| 0          | 0 | 0           |
| 0          | 0 | 0           |
| 0          | 0 | 0           |
| 0          | 0 | 0           |
| 0          | 0 | 0           |
| 0          | 0 | 0           |
| 0          | 0 | 0           |
| 0          | 0 | 0.000028    |
| 0          | 0 | 0           |
| 0          | 0 | 0           |
| 0          | 0 | 0           |
| 0          | 0 | 0           |
| 0          | 0 | 0           |
| 0          | 0 | 0           |
| 0          | 0 | 0           |
| 0          | 0 | 0           |
| 0          | 0 | 0           |
| 0          | 0 | 0.000000147 |
| 0.00000156 | 0 | 0           |
| 0          | 0 | 0           |
| 0          | 0 | 0           |
| 0          | 0 | 0           |
| 0          | 0 | 0           |
| 0          | 0 | 0           |
| 8.53E-08   | 0 | 9.93E-08    |
| 0          | 0 | 0.00000013  |
| 0          | 0 | 0           |
| 0          | 0 | 0           |
| 0          | 0 | 0           |
| 0          | 0 | 8.93E-08    |
| 0          | 0 | 0           |
| 0          | 0 | 0           |
| 0          | 0 | 0           |
| 0          | 0 | 0           |
| 0          | 0 | 0           |
| 0          | 0 | 0           |
| 0          | 0 | 0           |
| 0          | 0 | 0           |
| 0          | 0 | 1.94E-08    |
| 0          | 0 | 0           |
| 0          | 0 | 0           |
| 0          | 0 | 0           |
| 0          | 0 | 0           |



|             |            |             |
|-------------|------------|-------------|
| 0           | 0          | 0           |
| 1.25E-08    | 0          | 0           |
| 0           | 0          | 0.000000121 |
| 0           | 0          | 0           |
| 0           | 0          | 0           |
| 0           | 0          | 8.83E-08    |
| 0           | 0          | 0           |
| 0           | 0          | 0           |
| 0           | 0          | 0           |
| 0.000000168 | 0          | 0           |
| 0.00000194  | 0.00000242 | 0.00000244  |
| 0           | 0          | 0           |
| 0           | 0          | 0           |
| 0           | 0          | 0           |
| 0           | 0          | 0           |
| 0           | 0          | 0           |
| 0           | 0          | 0           |
| 0           | 0          | 0.0000275   |
| 0           | 0          | 8.01E-08    |
| 0           | 0          | 0           |
| 0           | 0          | 0           |
| 0           | 0          | 0           |
| 0           | 0          | 0           |
| 0           | 0          | 0           |
| 0           | 0          | 0           |
| 0.00000544  | 0.00000173 | 0.0000155   |
| 0           | 0          | 0           |
| 0           | 0          | 0           |
| 0           | 0          | 0           |
| 0           | 0          | 0           |
| 0           | 0          | 0           |
| 0           | 0          | 0           |
| 0           | 0          | 5.46E-08    |
| 0           | 0          | 0           |
| 0           | 0          | 0           |
| 0           | 0          | 0           |
| 0           | 0          | 0           |
| 0           | 0          | 0           |
| 0           | 0          | 0           |
| 0           | 0          | 0           |
| 0.000000117 | 0          | 0           |
| 0           | 0          | 0.00000356  |
| 0           | 0          | 0           |
| 0           | 0          | 0           |
| 0           | 0          | 0           |

|             |            |             |
|-------------|------------|-------------|
| 0           | 0          | 0           |
| 0           | 0          | 0.0000001   |
| 0           | 0          | 0           |
| 0.000000295 | 0          | 0           |
| 0           | 0          | 0           |
| 0           | 0          | 0           |
| 0           | 0          | 0           |
| 0           | 0          | 0           |
| 0           | 0          | 0           |
| 0           | 0          | 0           |
| 0           | 0          | 0           |
| 0           | 0          | 0           |
| 0           | 0          | 0           |
| 0           | 0          | 0.000000143 |
| 0           | 0          | 0           |
| 0           | 0          | 0           |
| 0           | 0          | 0           |
| 0           | 0          | 0           |
| 0.000000388 | 0          | 0           |
| 0           | 0          | 0           |
| 0           | 0          | 0           |
| 0           | 0          | 0           |
| 0.00000192  | 0.00000195 | 0.00000079  |
| 0           | 0          | 0           |
| 0.000000328 | 0          | 0.00000018  |
| 0           | 0          | 0           |
| 0           | 0          | 0           |
| 0           | 0          | 0           |
| 0           | 0          | 0           |
| 0.000000406 | 0          | 0           |
| 0           | 0          | 0           |
| 0           | 0          | 0           |
| 0           | 0          | 0           |
| 0           | 0          | 0           |
| 0           | 0          | 0           |
| 0           | 0          | 8.49E-08    |
| 0           | 0          | 0           |
| 0           | 0          | 0           |
| 0.00000028  | 0          | 0           |
| 0           | 0          | 0           |
| 0           | 0          | 0           |
| 0           | 0          | 0           |
| 0           | 0          | 8.42E-08    |















|             |            |             |
|-------------|------------|-------------|
| 0           | 0          | 0.00000226  |
| 0           | 0          | 0           |
| 0           | 0          | 0           |
| 0           | 0          | 0           |
| 0           | 0          | 0           |
| 0           | 0          | 0           |
| 0           | 0          | 0           |
| 0           | 0          | 0           |
| 0           | 0          | 0           |
| 0           | 0          | 0           |
| 0           | 0.00000299 | 0           |
| 0           | 0          | 0           |
| 0           | 0          | 0           |
| 0           | 0          | 0           |
| 0           | 0          | 0           |
| 0           | 0          | 0           |
| 0           | 0          | 0           |
| 0           | 0          | 0           |
| 0           | 0          | 0           |
| 0           | 0          | 0           |
| 0           | 0          | 0           |
| 0           | 0          | 0           |
| 0           | 0          | 0           |
| 0           | 0          | 0.000000191 |
| 0           | 0          | 0           |
| 0           | 0          | 0           |
| 0           | 0          | 0           |
| 0           | 0          | 0           |
| 0           | 0          | 0           |
| 0           | 0          | 0           |
| 0.000000294 | 0          | 0           |
| 0           | 0          | 0           |
| 0.000000458 | 0          | 0           |
| 0           | 0          | 0.00000293  |
| 0           | 0          | 0           |
| 0           | 0          | 0           |
| 0           | 0          | 0.000000104 |
| 0           | 0          | 0           |
| 0           | 0          | 0.00000334  |
| 0           | 0          | 0           |
| 0           | 0          | 0           |
| 0           | 0          | 0.000000179 |
| 0           | 0          | 9.05E-08    |
| 0           | 0          | 7.81E-08    |
| 0           | 0          | 0           |
| 0           | 0          | 0           |
| 0           | 0          | 0           |

|             |   |             |
|-------------|---|-------------|
| 0           | 0 | 0           |
| 0           | 0 | 0           |
| 0           | 0 | 0           |
| 0           | 0 | 0           |
| 0           | 0 | 0           |
| 0           | 0 | 0           |
| 0           | 0 | 0           |
| 0           | 0 | 0           |
| 0           | 0 | 0           |
| 0           | 0 | 0           |
| 0           | 0 | 0           |
| 0           | 0 | 0           |
| 0           | 0 | 0           |
| 0           | 0 | 0           |
| 0           | 0 | 0           |
| 0           | 0 | 0           |
| 0           | 0 | 0           |
| 0           | 0 | 0           |
| 0           | 0 | 0           |
| 0           | 0 | 0           |
| 0           | 0 | 0           |
| 0           | 0 | 0           |
| 0           | 0 | 0           |
| 0           | 0 | 0           |
| 0           | 0 | 0           |
| 0           | 0 | 0           |
| 0           | 0 | 0           |
| 0           | 0 | 0           |
| 0           | 0 | 0           |
| 0           | 0 | 0           |
| 0           | 0 | 0           |
| 0           | 0 | 0           |
| 0           | 0 | 0           |
| 0           | 0 | 0           |
| 0           | 0 | 0           |
| 0           | 0 | 0           |
| 0           | 0 | 0.000000115 |
| 0           | 0 | 0           |
| 0           | 0 | 0           |
| 0           | 0 | 0           |
| 0           | 0 | 0           |
| 0           | 0 | 0           |
| 0           | 0 | 0           |
| 0           | 0 | 0.00000028  |
| 0           | 0 | 0           |
| 0           | 0 | 0           |
| 0           | 0 | 0           |
| 0           | 0 | 0           |
| 0.000000378 | 0 | 0           |
| 0           | 0 | 0           |
| 0           | 0 | 0           |
| 0           | 0 | 0           |
| 0           | 0 | 0           |



|   |             |   |
|---|-------------|---|
| 0 | 0           | 0 |
| 0 | 0           | 0 |
| 0 | 0           | 0 |
| 0 | 0           | 0 |
| 0 | 0           | 0 |
| 0 | 0           | 0 |
| 0 | 0           | 0 |
| 0 | 0           | 0 |
| 0 | 0           | 0 |
| 0 | 0           | 0 |
| 0 | 0           | 0 |
| 0 | 0           | 0 |
| 0 | 0           | 0 |
| 0 | 0           | 0 |
| 0 | 0           | 0 |
| 0 | 0           | 0 |
| 0 | 0           | 0 |
| 0 | 0           | 0 |
| 0 | 0           | 0 |
| 0 | 0           | 0 |
| 0 | 0           | 0 |
| 0 | 0           | 0 |
| 0 | 0           | 0 |
| 0 | 0           | 0 |
| 0 | 0           | 0 |
| 0 | 0           | 0 |
| 0 | 0           | 0 |
| 0 | 0           | 0 |
| 0 | 0           | 0 |
| 0 | 0           | 0 |
| 0 | 0           | 0 |
| 0 | 0           | 0 |
| 0 | 0           | 0 |
| 0 | 0           | 0 |
| 0 | 0           | 0 |
| 0 | 0           | 0 |
| 0 | 0           | 0 |
| 0 | 0           | 0 |
| 0 | 0           | 0 |
| 0 | 0           | 0 |
| 0 | 0           | 0 |
| 0 | 0           | 0 |
| 0 | 0           | 0 |
| 0 | 0           | 0 |
| 0 | 0           | 0 |
| 0 | 0           | 0 |
| 0 | 0.000000109 | 0 |
| 0 | 0           | 0 |
| 0 | 0           | 0 |
| 0 | 0           | 0 |
| 0 | 0           | 0 |
| 0 | 0           | 0 |
| 0 | 0           | 0 |
| 0 | 0           | 0 |
| 0 | 0           | 0 |
| 0 | 0           | 0 |
| 0 | 0.00000023  | 0 |
| 0 | 0           | 0 |
| 0 | 0           | 0 |
| 0 | 0           | 0 |
| 0 | 0           | 0 |





|             |             |             |
|-------------|-------------|-------------|
| 0           | 0           | 0           |
| 0           | 0           | 0           |
| 0           | 0           | 0           |
| 0           | 0           | 0           |
| 0           | 0           | 0           |
| 0           | 0           | 0           |
| 0           | 0           | 0           |
| 0.000000158 | 0           | 0.000000201 |
| 0           | 0           | 0           |
| 0           | 0           | 0.000000118 |
| 0           | 0           | 0           |
| 0           | 0           | 0           |
| 0           | 0.000000388 | 0           |
| 0           | 0           | 0           |
| 0           | 0           | 0           |
| 0           | 0           | 0           |
| 0           | 0           | 0           |
| 0           | 0           | 0           |
| 0           | 0           | 0           |
| 0.000000023 | 0           | 0           |
| 0           | 0           | 0           |
| 0           | 0           | 0           |
| 0           | 0           | 0.0000001   |
| 0           | 0           | 0           |
| 0           | 0           | 0           |
| 0           | 0           | 0           |
| 0           | 0           | 0           |
| 0           | 0           | 0           |
| 0           | 0           | 0           |
| 0           | 0           | 0           |
| 0           | 0           | 0           |
| 0           | 0           | 0           |
| 0           | 0           | 0           |
| 0           | 0           | 0           |
| 0           | 0           | 0           |
| 0           | 0           | 0           |
| 0           | 0           | 0           |
| 0           | 0           | 0           |
| 0           | 0           | 0           |
| 0           | 0           | 0           |
| 0           | 0           | 0           |
| 0           | 0           | 0           |
| 0           | 0           | 0           |
| 0           | 0           | 0           |
| 0           | 0           | 0.000000195 |
| 0           | 0           | 0           |





|             |             |             |
|-------------|-------------|-------------|
| 0           | 0           | 0           |
| 0           | 0           | 0           |
| 0           | 0           | 0           |
| 0           | 0.000000254 | 0           |
| 0           | 0           | 0           |
| 0           | 0           | 0           |
| 0           | 0           | 0           |
| 0           | 0           | 0           |
| 0           | 0           | 0           |
| 0           | 0           | 0           |
| 0           | 0           | 0           |
| 0           | 0           | 0           |
| 0           | 0           | 0           |
| 0           | 0           | 0           |
| 0           | 0           | 0           |
| 0           | 0           | 0           |
| 0           | 0           | 0           |
| 0           | 0           | 0           |
| 0           | 0           | 0           |
| 0           | 0           | 0           |
| 0           | 0           | 0           |
| 0           | 0           | 0           |
| 0.000000407 | 0           | 0           |
| 0           | 0           | 0.00000291  |
| 0           | 0           | 0           |
| 0           | 0           | 0           |
| 0           | 0           | 0           |
| 0           | 0           | 0           |
| 0           | 0           | 0           |
| 0           | 0           | 0           |
| 0           | 0           | 0           |
| 0           | 0           | 0           |
| 0           | 0           | 0           |
| 0           | 0           | 0           |
| 0           | 0           | 0           |
| 0           | 0           | 0           |
| 0           | 0           | 0           |
| 0.000000246 | 0           | 0.000000297 |
| 0           | 0           | 0           |
| 0           | 0           | 0           |
| 0           | 0           | 0           |
| 0           | 0           | 0           |
| 0           | 0.000000146 | 0           |
| 0           | 0           | 6.34E-08    |
| 0           | 0           | 0           |
| 0           | 0           | 0           |
| 0           | 0           | 0           |
| 0           | 0           | 0           |
| 0           | 0           | 0           |

|             |             |             |
|-------------|-------------|-------------|
| 0.000000278 | 0           | 0           |
| 0           | 0           | 0           |
| 0.000000956 | 0           | 0           |
| 0           | 0           | 0           |
| 0           | 0           | 0           |
| 0           | 0           | 0           |
| 0           | 0           | 0           |
| 0           | 0           | 0           |
| 0           | 0           | 0           |
| 0           | 0           | 0           |
| 0           | 0           | 0           |
| 0           | 0           | 0           |
| 0           | 0           | 0           |
| 0           | 0           | 0           |
| 0           | 0           | 0           |
| 0           | 0           | 0           |
| 0           | 0           | 0.000000178 |
| 0           | 0           | 0           |
| 0           | 0           | 0           |
| 0           | 0           | 0           |
| 0           | 0           | 0           |
| 0           | 0           | 0           |
| 0           | 0           | 0           |
| 0           | 0           | 0           |
| 0.000000347 | 0           | 0           |
| 0           | 0           | 0           |
| 0           | 0           | 0           |
| 0           | 0           | 0           |
| 0           | 0           | 0           |
| 0           | 0           | 0           |
| 0           | 0           | 0           |
| 0           | 0           | 0           |
| 0           | 0           | 0           |
| 0           | 0           | 0           |
| 0           | 0           | 0           |
| 0           | 0           | 0           |
| 0.000000729 | 0.000000339 | 0.00000107  |
| 0           | 0           | 0           |
| 0           | 0           | 0           |
| 0           | 0           | 0           |
| 0           | 0           | 0           |
| 0           | 0           | 0.000000349 |
| 0           | 0           | 0           |
| 0           | 0           | 0           |
| 0.000000634 | 0.000000322 | 0.00000106  |
| 0           | 0           | 0           |
| 0.0000535   | 0           | 0           |
| 0.0000535   | 0           | 0           |
| 0           | 0.000000047 | 0           |
| 0           | 0           | 0           |
| 0           | 0           | 0           |
| 0           | 0           | 0           |

|             |   |            |
|-------------|---|------------|
| 0           | 0 | 0          |
| 0           | 0 | 0          |
| 0           | 0 | 0          |
| 0           | 0 | 0          |
| 0           | 0 | 0          |
| 0           | 0 | 0          |
| 0           | 0 | 0          |
| 0           | 0 | 0          |
| 0           | 0 | 0          |
| 0           | 0 | 0          |
| 0           | 0 | 0          |
| 0           | 0 | 0          |
| 0           | 0 | 0          |
| 0           | 0 | 0          |
| 0           | 0 | 0          |
| 0           | 0 | 0          |
| 0           | 0 | 0.000028   |
| 0           | 0 | 3.35E-08   |
| 0           | 0 | 0          |
| 0           | 0 | 0          |
| 0           | 0 | 0          |
| 0           | 0 | 0          |
| 0           | 0 | 0          |
| 0           | 0 | 0          |
| 0           | 0 | 0          |
| 0           | 0 | 0          |
| 0           | 0 | 0          |
| 0.000000591 | 0 | 0          |
| 0           | 0 | 0.00000348 |
| 0           | 0 | 0          |
| 0           | 0 | 0          |
| 0           | 0 | 0          |
| 0           | 0 | 0          |
| 0           | 0 | 0          |
| 0           | 0 | 0          |
| 0           | 0 | 0          |
| 0           | 0 | 0          |
| 0           | 0 | 0          |
| 0           | 0 | 0          |
| 0           | 0 | 0          |
| 0           | 0 | 0          |
| 0           | 0 | 0          |
| 0           | 0 | 0          |
| 0           | 0 | 0          |
| 0           | 0 | 0          |
| 0           | 0 | 0          |
| 0           | 0 | 0          |
| 0           | 0 | 0          |
| 0           | 0 | 0          |
| 0           | 0 | 0          |
| 0           | 0 | 8.41E-08   |
| 0           | 0 | 0          |
| 0           | 0 | 0          |













|             |             |             |
|-------------|-------------|-------------|
| 0           | 0           | 0.000000142 |
| 0           | 0           | 0           |
| 0           | 0           | 0           |
| 0           | 0           | 0           |
| 0           | 0           | 0           |
| 0           | 0           | 0           |
| 0           | 0           | 0           |
| 0           | 0           | 0           |
| 0           | 0           | 0           |
| 0           | 0           | 0           |
| 0           | 0           | 0           |
| 0.000000191 | 0           | 0           |
| 0           | 0           | 0           |
| 0.00000015  | 0.000000537 | 0.000000165 |
| 0           | 0           | 0           |
| 0.000000113 | 0           | 7.92E-08    |
| 0           | 0           | 0           |
| 0           | 0           | 0           |
| 0           | 0.000000298 | 0.000000141 |
| 0           | 0.000000298 | 0.000000124 |
| 0           | 0.000000298 | 0.000000124 |
| 0           | 0           | 0           |
| 0           | 0           | 0           |
| 0           | 0           | 5.75E-08    |
| 0           | 0           | 0.000000359 |
| 0           | 0           | 0           |
| 0           | 0           | 0           |
| 0           | 0           | 5.75E-08    |
| 0           | 0           | 0.000000359 |
| 0           | 0           | 0           |
| 0           | 0           | 0           |
| 0           | 0           | 5.75E-08    |
| 0           | 0           | 0.000000359 |
| 0           | 0.000000204 | 0.000000084 |
| 0           | 0.000000204 | 0.000000096 |
| 0           | 0.000000204 | 0.000000084 |
| 0           | 0.000000298 | 0.000000124 |
| 0           | 0           | 0           |
| 0           | 0           | 0           |
| 0           | 0           | 0           |
| 0           | 0           | 0           |
| 0.000000102 | 0.000000171 | 0.000000213 |
| 0           | 0           | 0           |
| 0.000000463 | 0.000000582 | 0.000000115 |
| 0           | 0           | 0           |
| 0           | 0           | 0           |
| 0           | 0           | 0           |





|             |            |             |
|-------------|------------|-------------|
| 0           | 0          | 0           |
| 0.00000662  | 0.00000183 | 0.0000177   |
| 0           | 0          | 0           |
| 0           | 0          | 0           |
| 0           | 0          | 0           |
| 0           | 0          | 0           |
| 0           | 0          | 0           |
| 0           | 0          | 0           |
| 0           | 0          | 0           |
| 0           | 0          | 0           |
| 0           | 0          | 0           |
| 0           | 0          | 0           |
| 0           | 0          | 0           |
| 0           | 0          | 0           |
| 0           | 0          | 0           |
| 0           | 0          | 0           |
| 0           | 0          | 0           |
| 0           | 0          | 0           |
| 0           | 0          | 0           |
| 0           | 0          | 0           |
| 0           | 0          | 0           |
| 0           | 0          | 0           |
| 0           | 0          | 0           |
| 0           | 0          | 0           |
| 0           | 0          | 0           |
| 0           | 0          | 0           |
| 0           | 0          | 0           |
| 0           | 0          | 0           |
| 0           | 0          | 0           |
| 0           | 0          | 0           |
| 0           | 0          | 0           |
| 0           | 0          | 0           |
| 0           | 0          | 0           |
| 0           | 0          | 0           |
| 0           | 0          | 0           |
| 0           | 0          | 0           |
| 0.000000225 | 0          | 0.000000234 |
| 0           | 0          | 0           |
| 0           | 0          | 0           |
| 0           | 0          | 0           |
| 0           | 0          | 0           |
| 0           | 0          | 0           |
| 0           | 0          | 0           |
| 0           | 0          | 0           |
| 0           | 0          | 0           |
| 0           | 0          | 0           |
| 0           | 0          | 0           |
| 0           | 0          | 0           |
| 0           | 0          | 0           |
| 0           | 0          | 0.0000264   |
| 0           | 8.35E-08   | 0           |
| 0           | 0          | 0           |
| 0           | 0          | 3.98E-08    |
| 0           | 0          | 0           |







|             |   |            |
|-------------|---|------------|
| 0           | 0 | 0          |
| 0           | 0 | 0.00000019 |
| 0           | 0 | 0          |
| 0.000000261 | 0 | 0          |
| 0           | 0 | 0          |
| 0.000000578 | 0 | 0          |
| 0           | 0 | 0.00000361 |
| 0           | 0 | 0          |
| 0           | 0 | 0          |
| 0           | 0 | 0          |
| 0           | 0 | 0          |
| 0           | 0 | 0          |
| 0           | 0 | 0          |
| 0           | 0 | 0          |
| 0           | 0 | 0          |
| 0           | 0 | 0          |
| 0           | 0 | 0          |
| 0           | 0 | 0          |
| 0           | 0 | 0          |
| 0           | 0 | 0          |
| 0           | 0 | 0          |
| 0           | 0 | 0          |
| 0           | 0 | 0          |
| 0           | 0 | 0          |
| 0           | 0 | 0          |
| 0           | 0 | 0          |
| 0           | 0 | 7.89E-08   |
| 0           | 0 | 0          |
| 0           | 0 | 0          |
| 0           | 0 | 0          |
| 0.000000312 | 0 | 0          |
| 0           | 0 | 0          |
| 0.000000645 | 0 | 0          |
| 0           | 0 | 0.00000427 |
| 0           | 0 | 0          |
| 0           | 0 | 0          |
| 0           | 0 | 0          |
| 0           | 0 | 0          |
| 0           | 0 | 0          |
| 0           | 0 | 0          |
| 0           | 0 | 0          |
| 0.000000343 | 0 | 0          |
| 0.000000739 | 0 | 0          |
| 0           | 0 | 0.00000386 |
| 0           | 0 | 0          |
| 0           | 0 | 0          |
| 0           | 0 | 0          |
| 0           | 0 | 0          |
| 0           | 0 | 0          |









|             |            |             |
|-------------|------------|-------------|
| 0           | 0          | 0           |
| 0           | 0          | 0           |
| 0           | 0          | 0           |
| 0.000000225 | 0          | 0.000000234 |
| 0           | 0          | 0           |
| 0           | 0          | 0           |
| 0           | 0          | 0           |
| 0           | 0          | 0           |
| 0           | 0          | 0           |
| 0           | 0          | 0           |
| 0           | 0          | 0           |
| 0           | 0          | 0           |
| 0           | 0          | 0           |
| 0           | 0          | 0.0000264   |
| 0           | 8.35E-08   | 0           |
| 0           | 0          | 0           |
| 0           | 0          | 3.98E-08    |
| 0           | 0          | 0           |
| 0           | 0          | 0           |
| 0           | 0          | 0           |
| 0           | 0          | 0           |
| 0           | 0          | 0           |
| 0           | 0          | 0           |
| 0           | 0.00000053 | 0           |
| 0           | 0          | 0           |
| 0           | 0          | 0           |
| 0           | 0          | 0           |
| 0           | 0          | 0           |
| 0           | 0          | 0           |
| 0           | 0          | 0           |
| 0           | 0          | 0           |
| 0           | 0          | 0           |
| 0           | 0          | 0           |
| 0           | 0          | 0           |
| 0           | 0          | 0           |
| 0           | 0          | 0           |
| 0           | 0          | 0           |
| 0           | 0          | 0           |
| 0           | 0          | 0           |
| 0           | 0          | 0           |
| 0           | 0          | 0           |
| 0           | 0          | 0           |
| 0           | 0          | 0           |
| 0           | 0          | 0           |
| 0           | 0          | 0           |
| 0           | 0          | 0           |
| 0.00000029  | 0          | 0           |
| 0           | 0          | 0.00000303  |



|            |             |             |
|------------|-------------|-------------|
| 0          | 0           | 0           |
| 0          | 0           | 0           |
| 0          | 0           | 0           |
| 0          | 0           | 0           |
| 6.81E-08   | 0           | 9.23E-08    |
| 0          | 0           | 0.000000116 |
| 0.00000057 | 0.000000941 | 0.00000116  |
| 0          | 0           | 0           |
| 0          | 0           | 0           |
| 0          | 0           | 0           |
| 0          | 0           | 0           |
| 0          | 0           | 8.62E-08    |
| 0          | 0           | 0           |
| 0          | 0           | 0           |
| 0          | 0           | 0           |
| 0          | 0           | 0           |
| 0          | 0           | 0           |
| 0          | 0           | 0           |
| 0          | 0           | 0           |
| 0          | 0           | 0           |
| 0          | 0           | 0           |
| 0          | 0           | 0           |
| 0          | 0           | 0           |
| 0          | 0           | 0           |
| 0          | 0           | 0.0000364   |
| 0          | 0           | 0           |
| 0          | 0           | 0           |
| 0          | 0           | 0           |
| 0          | 0           | 0           |
| 0          | 0           | 0           |
| 0          | 0           | 0           |
| 0          | 0           | 0           |
| 0          | 0           | 0           |
| 0          | 0           | 0           |
| 0          | 0           | 0           |
| 0          | 0           | 0           |
| 0          | 0           | 0           |
| 0          | 0           | 0           |
| 0          | 0           | 0           |
| 0          | 0           | 0           |
| 0          | 0           | 0           |
| 0          | 0           | 0           |
| 0          | 0           | 0           |
| 0.00000749 | 0.00000231  | 0.0000223   |
| 0          | 0           | 0           |
| 0          | 0           | 0           |
| 0          | 0           | 0           |
| 0          | 0           | 0           |
| 0          | 0           | 0           |











|             |   |          |
|-------------|---|----------|
| 0           | 0 | 0        |
| 0           | 0 | 0        |
| 0           | 0 | 0        |
| 0           | 0 | 0        |
| 0           | 0 | 0        |
| 0           | 0 | 0        |
| 0           | 0 | 0        |
| 0           | 0 | 0        |
| 0           | 0 | 0        |
| 0           | 0 | 0        |
| 0           | 0 | 0        |
| 0           | 0 | 0        |
| 0           | 0 | 0        |
| 0           | 0 | 0        |
| 0           | 0 | 0        |
| 0           | 0 | 0        |
| 0           | 0 | 0        |
| 0           | 0 | 0        |
| 0           | 0 | 0        |
| 0           | 0 | 0        |
| 0           | 0 | 0        |
| 0           | 0 | 0        |
| 0           | 0 | 0        |
| 0           | 0 | 0        |
| 0           | 0 | 0        |
| 0           | 0 | 0        |
| 0           | 0 | 0        |
| 0           | 0 | 0        |
| 0           | 0 | 0        |
| 0           | 0 | 0        |
| 0           | 0 | 0        |
| 0           | 0 | 0        |
| 0           | 0 | 0        |
| 0           | 0 | 0        |
| 0           | 0 | 0        |
| 0           | 0 | 0        |
| 0           | 0 | 0        |
| 0           | 0 | 4.89E-08 |
| 0           | 0 | 0        |
| 0           | 0 | 0        |
| 0           | 0 | 0        |
| 0           | 0 | 0        |
| 0           | 0 | 0        |
| 0           | 0 | 0        |
| 0           | 0 | 0        |
| 0           | 0 | 0        |
| 0           | 0 | 0        |
| 0           | 0 | 0        |
| 0.000000547 | 0 | 0        |
| 0           | 0 | 0        |
| 0           | 0 | 0        |









|            |            |             |
|------------|------------|-------------|
| 0          | 0          | 0           |
| 0          | 0          | 0           |
| 0.00000681 | 0.00000215 | 0.0000209   |
| 0          | 0          | 0           |
| 0          | 0          | 0           |
| 0          | 0          | 0           |
| 0          | 0          | 0           |
| 0          | 0          | 0           |
| 0          | 0          | 0           |
| 0          | 0          | 0           |
| 0          | 0          | 0           |
| 0          | 0          | 0           |
| 0          | 0          | 0           |
| 0          | 0          | 0           |
| 0          | 0          | 0           |
| 0          | 0          | 0           |
| 0          | 0          | 0           |
| 0          | 0          | 0           |
| 0          | 0          | 0           |
| 0          | 0          | 0           |
| 0          | 0          | 0           |
| 0          | 0          | 0           |
| 0          | 0          | 0           |
| 0          | 0          | 0           |
| 0          | 0          | 0           |
| 0          | 0          | 0           |
| 0          | 0          | 0           |
| 0          | 0          | 0           |
| 0          | 0          | 0           |
| 0          | 0          | 0           |
| 0          | 0          | 0           |
| 0          | 0          | 0.0000314   |
| 0          | 0          | 0           |
| 0          | 0          | 0           |
| 0          | 0          | 0           |
| 0          | 0          | 0           |
| 0          | 0          | 0           |
| 0          | 0          | 0           |
| 0          | 0          | 0           |
| 0          | 0          | 0           |
| 0          | 0          | 0           |
| 0          | 0          | 0           |
| 0          | 0          | 0           |
| 0          | 0          | 0           |
| 0          | 0          | 0           |
| 0          | 0          | 0           |
| 0          | 0          | 0           |
| 0          | 0          | 0           |
| 0          | 0          | 0           |
| 0          | 0          | 0           |
| 0          | 0          | 0           |
| 0          | 0          | 0           |
| 0          | 0          | 0           |
| 0          | 0          | 0           |
| 0          | 0          | 0           |
| 0          | 0          | 0           |
| 0          | 0          | 0           |
| 0          | 0          | 0.000000145 |
| 0          | 0          | 0           |
| 0          | 0          | 0.000000167 |

















|             |             |             |
|-------------|-------------|-------------|
| 0           | 0           | 0           |
| 0           | 0           | 0           |
| 0           | 0           | 0           |
| 0           | 0           | 0           |
| 0           | 0           | 0           |
| 0           | 0           | 0           |
| 0           | 0           | 0           |
| 0           | 0           | 0           |
| 0           | 0           | 0           |
| 0           | 0           | 0           |
| 0           | 0           | 0           |
| 0           | 0           | 0           |
| 0           | 0           | 0           |
| 0           | 0           | 0           |
| 0.000000509 | 0           | 0           |
| 0           | 0           | 0           |
| 0           | 0           | 0           |
| 0.00000117  | 0           | 0           |
| 0           | 0           | 0.00000505  |
| 0           | 0.000000097 | 0           |
| 0           | 0           | 0           |
| 0           | 0           | 0           |
| 0           | 0           | 0           |
| 0           | 0           | 0           |
| 0           | 0           | 0           |
| 0           | 0           | 0           |
| 0           | 0           | 0           |
| 0           | 0           | 0           |
| 0           | 0           | 0           |
| 0           | 0           | 0           |
| 0           | 0           | 0           |
| 0           | 0           | 0           |
| 0           | 0           | 0           |
| 0           | 0           | 0           |
| 0           | 0           | 0           |
| 0           | 0           | 0           |
| 0           | 0           | 0           |
| 0           | 0           | 0           |
| 0           | 0           | 0           |
| 0           | 0           | 0           |
| 0           | 0           | 0           |
| 0           | 0           | 0           |
| 0           | 0           | 0           |
| 0           | 0           | 0.000000257 |
| 0           | 0           | 0           |
| 0           | 0           | 0           |
| 0           | 0           | 0           |
| 0           | 0           | 0           |
| 0.000000216 | 0           | 0           |
| 0           | 0           | 0           |
| 0.000000417 | 0           | 0           |
| 0           | 0           | 0.00000372  |





|             |             |             |
|-------------|-------------|-------------|
| 0           | 0           | 0           |
| 0           | 0           | 0           |
| 0           | 0           | 0           |
| 0           | 0           | 0           |
| 0           | 0           | 0           |
| 0           | 0           | 0           |
| 0           | 0           | 0           |
| 0           | 0           | 0.000000274 |
| 0           | 0           | 0           |
| 0           | 0           | 0           |
| 0           | 0           | 0           |
| 0           | 0           | 0           |
| 0           | 0.000000294 | 0           |
| 0           | 0           | 0           |
| 0           | 0           | 0           |
| 0           | 0           | 0           |
| 0           | 0           | 0           |
| 0           | 0           | 0           |
| 0.00000032  | 0           | 0           |
| 0.000000831 | 0           | 0           |
| 0           | 0           | 0.00000362  |
| 0           | 0.000000097 | 0           |
| 0           | 0           | 0           |
| 0           | 0           | 0           |
| 0           | 0           | 0           |
| 0           | 0           | 0           |
| 0           | 0           | 0           |
| 0           | 0           | 0           |
| 0           | 0           | 0           |
| 0           | 0           | 0           |
| 0           | 0           | 0           |
| 0           | 0           | 0           |
| 0           | 0           | 0           |
| 0           | 0           | 0           |
| 0           | 0           | 0           |
| 0           | 0           | 0           |
| 0           | 0           | 0           |
| 0           | 0           | 0           |
| 0           | 0           | 0           |
| 0           | 0           | 0           |
| 0           | 0           | 0           |
| 0           | 0           | 0           |
| 0           | 0           | 0.000000257 |
| 0           | 0           | 0           |
| 0           | 0           | 0           |
| 0           | 0           | 0           |
| 0           | 0           | 0           |



|             |             |             |
|-------------|-------------|-------------|
| 0           | 0           | 0           |
| 0           | 0           | 0           |
| 0           | 0           | 0           |
| 0           | 0           | 0           |
| 0           | 0           | 0           |
| 0           | 0           | 0           |
| 0           | 0           | 0           |
| 0           | 0           | 0           |
| 0           | 0           | 0           |
| 0           | 0           | 0           |
| 0           | 0           | 7.11E-08    |
| 0           | 0           | 0           |
| 0           | 0           | 0           |
| 0           | 0           | 0           |
| 0.000000346 | 0           | 0           |
| 0.000000757 | 0           | 0           |
| 0           | 0           | 0.00000478  |
| 0           | 0           | 0           |
| 0           | 0           | 0           |
| 0           | 0           | 0           |
| 0           | 0.000000159 | 0.00000444  |
| 0           | 0           | 0           |
| 5.99E-08    | 0           | 0           |
| 0           | 0           | 0           |
| 0           | 0           | 0           |
| 0           | 0           | 0           |
| 0           | 0           | 0.000000137 |
| 0           | 0           | 0           |
| 0           | 0           | 0           |
| 0           | 0           | 0           |
| 0           | 0           | 0           |
| 0           | 0           | 0           |
| 0           | 0           | 0           |
| 0           | 0.000000257 | 0           |
| 0           | 9.08E-08    | 0.0000566   |
| 0           | 0           | 0           |
| 0           | 0           | 0           |
| 0           | 0.000000358 | 0           |
| 0           | 0           | 0           |
| 0           | 0           | 0.000000171 |
| 0           | 0           | 0.000000284 |
| 0           | 0           | 0           |
| 0           | 0           | 0           |
| 0           | 0           | 0           |
| 0           | 0           | 0           |















|  |             |             |             |
|--|-------------|-------------|-------------|
|  | 0           | 0           | 0.00000343  |
|  | 0           | 0           | 0           |
|  | 0           | 0           | 3.43E-08    |
|  | 0           | 0           | 0           |
|  | 0           | 0           | 0           |
|  | 0           | 0           | 0           |
|  | 0           | 0           | 0           |
|  | 0           | 0           | 0           |
|  | 0           | 0           | 0           |
|  | 0.000000639 | 0           | 0           |
|  | 0           | 0           | 0.00000326  |
|  | 0           | 0           | 0           |
|  | 0           | 0           | 5.56E-08    |
|  | 0.00000186  | 0.000000668 | 0.00000205  |
|  | 0           | 0           | 0           |
|  | 0.000000134 | 0           | 9.62E-08    |
|  | 0           | 0           | 0           |
|  | 0           | 0           | 0           |
|  | 0           | 0           | 0           |
|  | 0           | 0           | 0           |
|  | 0           | 0           | 0           |
|  | 0           | 0           | 0           |
|  | 0           | 0           | 0           |
|  | 0           | 0           | 0           |
|  | 0           | 0           | 0           |
|  | 0           | 0           | 0           |
|  | 0           | 0           | 0           |
|  | 0           | 0           | 0           |
|  | 0           | 0           | 0           |
|  | 0           | 0           | 0           |
|  | 0           | 0           | 0           |
|  | 0           | 0           | 0           |
|  | 0           | 0           | 0           |
|  | 0           | 0           | 0           |
|  | 0           | 0           | 0           |
|  | 0           | 0           | 0           |
|  | 0           | 0           | 0           |
|  | 0           | 0           | 0.000000128 |
|  | 0           | 0           | 0           |
|  | 0           | 0           | 0           |
|  | 0           | 0           | 0.000000624 |
|  | 0           | 0           | 0           |
|  | 0           | 0           | 0           |
|  | 0           | 0           | 4.25E-08    |
|  | 0           | 0           | 0           |
|  | 0           | 0           | 4.25E-08    |
|  | 0           | 0           | 0           |
|  | 0           | 0           | 0           |
|  | 0           | 0           | 0           |
|  | 0           | 0           | 0           |







|            |            |             |
|------------|------------|-------------|
| 0          | 0          | 0           |
| 0          | 0          | 0           |
| 0          | 0          | 0           |
| 0          | 0          | 0           |
| 0          | 0          | 0           |
| 0          | 0          | 0           |
| 0          | 0          | 6.95E-08    |
| 0          | 0          | 0           |
| 0          | 0          | 0           |
| 0          | 0          | 0           |
| 0          | 0          | 0           |
| 0          | 0          | 0           |
| 0          | 0          | 0           |
| 0          | 0          | 0           |
| 0          | 0          | 0.000000225 |
| 0          | 0          | 0           |
| 0          | 0          | 0           |
| 0          | 0          | 0           |
| 0          | 0          | 0           |
| 0          | 0          | 0.0000001   |
| 0          | 0          | 0           |
| 0          | 0          | 0           |
| 0          | 0          | 0           |
| 0          | 0          | 0           |
| 0          | 7.76E-08   | 0.00000014  |
| 0          | 0          | 0           |
| 0          | 0          | 0           |
| 0          | 0          | 0           |
| 0          | 0          | 0           |
| 0          | 0          | 0           |
| 0          | 0          | 0           |
| 0          | 0          | 0           |
| 0          | 0          | 0           |
| 0          | 0          | 0           |
| 0          | 0          | 0           |
| 0          | 0          | 0           |
| 0          | 0          | 0           |
| 0          | 0          | 0           |
| 0          | 0          | 0           |
| 0          | 0          | 0.000000121 |
| 0          | 0          | 0           |
| 0          | 0          | 0           |
| 0          | 0          | 0           |
| 0          | 0          | 0           |
| 0          | 0          | 0           |
| 0          | 0          | 0           |
| 0.00000667 | 0.00000213 | 0.0000184   |

|             |             |             |
|-------------|-------------|-------------|
| 0           | 0           | 0           |
| 0           | 0           | 0           |
| 0           | 0           | 0           |
| 0           | 0           | 0           |
| 0           | 0           | 0           |
| 0           | 0           | 0           |
| 0           | 0           | 0           |
| 0           | 0           | 0           |
| 0           | 0           | 0           |
| 0           | 0           | 0           |
| 0           | 0           | 0           |
| 0           | 8.82E-08    | 0.0000525   |
| 0           | 0           | 0           |
| 0           | 0           | 0           |
| 0           | 0           | 0           |
| 0           | 0.000000317 | 0           |
| 0.000000292 | 0           | 0           |
| 0.00000015  | 0           | 0           |
| 0           | 0           | 0.00000211  |
| 0           | 0           | 0.000000357 |
| 0           | 0           | 0           |
| 0           | 0           | 0           |
| 0           | 0           | 0           |
| 0           | 0           | 0           |
| 0           | 0           | 0           |
| 0           | 0           | 0           |
| 0           | 0           | 0           |
| 0           | 0           | 0           |
| 0           | 0           | 0           |
| 0           | 0           | 0           |
| 0           | 0           | 0           |
| 0           | 0           | 0           |
| 0           | 0           | 0           |
| 0           | 0           | 0           |
| 0           | 0           | 0           |
| 0           | 0           | 0           |
| 0           | 0           | 0           |
| 0           | 0           | 0           |
| 0           | 0           | 0           |
| 0           | 0           | 0           |
| 0           | 0           | 0           |
| 0           | 0           | 0           |
| 0           | 0           | 4.89E-08    |
| 0           | 0           | 0.000000368 |
| 0           | 0           | 0           |
| 0           | 0           | 0           |
| 0.0000056   | 0.00000182  | 0.0000168   |
| 0           | 0           | 0           |
| 0           | 0           | 0           |
| 0           | 0           | 0           |
| 0           | 0           | 0           |
| 0           | 0           | 4.68E-08    |
| 0           | 0           | 0           |





|             |             |             |
|-------------|-------------|-------------|
| 0           | 0           | 0           |
| 0           | 0           | 0           |
| 0           | 0           | 0           |
| 0.000000388 | 0           | 0           |
| 0           | 0           | 0           |
| 0           | 0           | 0           |
| 0.00000124  | 0           | 0           |
| 0           | 0           | 0.00000403  |
| 0.000000233 | 0           | 0.000000154 |
| 0.000000142 | 0           | 0.000000107 |
| 0.00000824  | 0.00000258  | 0           |
| 0.0000676   | 0.0000278   | 0.000140824 |
| 0.00000014  | 0           | 0.000000106 |
| 0           | 0           | 0           |
| 0.000169727 | 0.0000861   | 0.000144802 |
| 0.000000827 | 0.000000998 | 0.00000225  |
| 0.000420345 | 0.00061002  | 0.000574406 |
| 0           | 0           | 0.000000435 |
| 0.00000106  | 0.00000106  | 0.00000384  |
| 0.00000791  | 0.00000238  | 0           |
| 0.000000236 | 0           | 0.00000111  |
| 0           | 0.000000387 | 0.000231694 |
| 0           | 7.04E-08    | 0.000000325 |
| 0.000215966 | 0.000142676 | 0.000338021 |
| 0.000000139 | 0           | 0.000000964 |
| 0.000000917 | 0.000000998 | 0.000000217 |
| 0           | 0           | 0           |
| 0           | 0           | 0           |
| 0.0000927   | 0.0000188   | 0.000117001 |
| 0           | 0           | 0           |
| 0           | 0           | 0           |
| 0.00000829  | 0.00000272  | 0           |
| 0.00000733  | 0.0000306   | 0           |
| 0.00000111  | 0.00000112  | 0.00000182  |
| 0.000316582 | 0.000168352 | 0.000296683 |
| 0.000000147 | 0           | 0.000000109 |
| 0.00000777  | 0.0000023   | 0           |
| 0.0000789   | 0.000124418 | 0.0000027   |
| 0.000000142 | 0           | 0.000000113 |
| 0.000000597 | 0.00000031  | 0.000000996 |
| 0.00000786  | 0.00000255  | 0           |
| 0.000118371 | 0.000176411 | 0.0000254   |
| 0.00000022  | 0.000000117 | 0.000000113 |
| 0.000000167 | 0           | 4.36E-08    |
| 0.000000224 | 0           | 0.000000169 |
| 0.0001191   | 0.0000667   | 0.000102195 |
| 0.0000788   | 0.0000615   | 0.000093    |

|             |             |             |
|-------------|-------------|-------------|
| 0.000000654 | 0.00000135  | 0           |
| 0.0102177   | 0.00305058  | 0           |
| 0.000000476 | 0.000000781 | 0.00000134  |
| 0           | 0           | 0           |
| 0           | 0           | 0           |
| 0.000000197 | 0           | 0.000000103 |
| 0.00000035  | 0.000000565 | 0.000000765 |
| 0.000138508 | 0.000190054 | 0.000222707 |
| 0.000000193 | 0           | 0.000000204 |
| 0.000000117 | 0           | 0.000000111 |
| 0.0000972   | 0.0000483   | 0.000310063 |
| 0.000258498 | 0.000334497 | 0.000439114 |
| 0.00000116  | 0.000000925 | 0.0000019   |
| 8.91E-08    | 0.000000192 | 0.000000227 |
| 0.0000571   | 0.0000335   | 0.000156398 |
| 0.000000847 | 0.00000116  | 0.00000214  |
| 0           | 0           | 0           |
| 0.00000502  | 0.00000157  | 0.00000204  |
| 0.000210529 | 0.000113968 | 0.000158182 |
| 0.00000018  | 0           | 0.000000138 |
| 0           | 0.0000759   | 0           |
| 0           | 6.05E-08    | 0           |
| 0           | 6.05E-08    | 0           |
| 0.000145027 | 0.000133972 | 0.000393412 |
| 0.000337556 | 0.00042977  | 0.000337981 |
| 0.000000191 | 0           | 0.000000154 |
| 0           | 0           | 0.000000726 |
| 0.00000166  | 0.00000274  | 0.00000429  |
| 0.000000853 | 0.00000108  | 0.00000225  |
| 0.000251719 | 0.00019481  | 0.000331702 |
| 0.00000023  | 0           | 7.75E-08    |
| 0           | 0           | 0           |
| 0.000000143 | 0           | 0.000000164 |
| 0.00000018  | 0           | 0.000000121 |
| 0.00000018  | 0           | 0.000000121 |
| 0           | 0.000000298 | 0.00000124  |
| 0.000000134 | 0           | 0.000000179 |
| 0.00000057  | 0           | 0.000000483 |
| 0.000378629 | 0.000423669 | 0.000364629 |
| 0           | 0           | 0           |
| 0.000016    | 0.0000103   | 0.00000164  |
| 0           | 5.48E-08    | 0           |
| 0           | 0.000000213 | 0.000000164 |
| 0           | 0           | 0.000000667 |
| 0.000150008 | 0.0000768   | 0.000358324 |
| 0.0000197   | 0.000000425 | 0           |
| 0           | 0           | 0           |

|             |             |             |
|-------------|-------------|-------------|
| 0           | 0           | 0           |
| 0.000292578 | 0.000377365 | 0.000299235 |
| 0.000444138 | 0.000549848 | 0.000578065 |
| 0.000000765 | 0.000000629 | 0.000000684 |
| 0           | 0           | 0           |
| 0           | 0.000000106 | 0           |
| 0.000000169 | 0           | 0.000000168 |
| 0.000130737 | 0.0000668   | 0.000146189 |
| 0.000000593 | 0           | 0.000000591 |
| 0           | 0           | 0           |
| 0.000306185 | 0.000400975 | 0.000323146 |
| 0.000000149 | 0           | 0.000000121 |
| 0.000002    | 0.00000253  | 0.00000353  |
| 0.000000508 | 0.000000679 | 0.000000779 |
| 0.000000517 | 0.000000428 | 0.000000477 |
| 0.000000151 | 0           | 0.00000012  |
| 0.000000227 | 0           | 0.000000105 |
| 0.000000227 | 0           | 0.000000105 |
| 0.00000226  | 0.00000143  | 0.00000201  |
| 0           | 0           | 0           |
| 0           | 0           | 0           |
| 0.000000185 | 0           | 9.69E-08    |
| 0.000000227 | 0           | 0.000000108 |
| 0.00000168  | 0.00000106  | 0.00000213  |
| 0           | 0           | 0           |
| 0.0000209   | 0.00000239  | 0.000000255 |
| 0           | 0           | 0.000000267 |
| 0.000000145 | 0           | 0.000000126 |
| 0.000308624 | 0.000231155 | 0.000385242 |
| 0.000000155 | 0           | 0.000000131 |
| 0.000000152 | 0           | 0.00000005  |
| 0.000000144 | 0           | 0.000000116 |
| 0.000000168 | 0           | 7.58E-08    |
| 0           | 0.000000101 | 0           |
| 0.00000082  | 0.000000284 | 0.000000959 |
| 0.000000181 | 0           | 0.000000302 |
| 0.000000134 | 0           | 6.19E-08    |
| 0           | 0           | 0           |
| 0.00000016  | 0           | 0.000000106 |
| 0.000106494 | 0.0000397   | 0.000367225 |
| 0.000383666 | 0.000518238 | 0.00053767  |
| 0.000383666 | 0.000518238 | 0.00053767  |
| 0.000000125 | 0           | 0.000000164 |
| 0           | 0           | 0           |
| 0           | 0           | 0           |
| 0.000148357 | 0.000158816 | 0.0000284   |
| 4.86E-08    | 0           | 0.000000118 |



|             |             |             |
|-------------|-------------|-------------|
| 0.000000191 | 0           | 9.04E-08    |
| 0.00000012  | 0           | 0.000000187 |
| 0.000000142 | 0           | 0.000000116 |
| 0.000000179 | 0           | 5.45E-08    |
| 0.00000018  | 0           | 9.43E-08    |
| 0           | 0           | 0           |
| 0.000000103 | 0           | 5.97E-08    |
| 0.0000222   | 0.000000547 | 0           |
| 0           | 0           | 0           |
| 0.000000157 | 0           | 0.000000142 |
| 0           | 0           | 0.00000114  |
| 0.00000674  | 0.00000154  | 0.00000376  |
| 0.000000109 | 0           | 6.25E-08    |
| 0.000000175 | 0           | 0.000000104 |
| 0.000000152 | 0           | 0.000000111 |
| 0.0000002   | 0           | 0.000000256 |
| 0.000171938 | 0.00013196  | 0.000188475 |
| 0           | 0           | 0           |
| 0           | 0           | 0           |
| 0.000037    | 0.0000131   | 0.00012376  |
| 0.00021487  | 0.000253454 | 0.000173024 |
| 0           | 0           | 0           |
| 0.000000139 | 0           | 9.81E-08    |
| 0           | 0           | 0           |
| 0.000000151 | 0           | 0.000000105 |
| 0           | 0           | 0.000000995 |
| 0.000000141 | 0           | 0.000000101 |
| 0.000000141 | 0           | 0.000000101 |
| 0.000149409 | 0.0000683   | 0.000242907 |
| 0.0000134   | 0.000000335 | 0           |
| 0.00000105  | 0.00000323  | 0.00000141  |
| 0.000000197 | 0           | 7.67E-08    |
| 0.215546    | 0.224667    | 0.20925     |
| 0.0000132   | 0.00000025  | 0           |
| 0           | 0           | 0           |
| 0.000000781 | 0.000000857 | 0.00000972  |
| 0           | 0           | 0           |
| 0.000124011 | 0.0000456   | 0.000164762 |
| 0.000000265 | 0           | 8.07E-08    |
| 0           | 0           | 0           |
| 0           | 0           | 0           |
| 0           | 0           | 0           |
| 0.00000348  | 0.00000476  | 0.00000766  |
| 0           | 0           | 0           |
| 0           | 0           | 0.000000331 |
| 0           | 0           | 0           |
| 0.000100597 | 0.0000358   | 0.000327077 |

|             |             |             |
|-------------|-------------|-------------|
| 0.000246597 | 0.000201074 | 0.000424271 |
| 0           | 0           | 0           |
| 0.00000467  | 0.00000153  | 0.00000203  |
| 0.000000069 | 0           | 5.44E-08    |
| 0           | 0           | 0           |
| 0           | 0           | 0           |
| 0.000000172 | 0           | 0           |
| 0.0000021   | 0.00000532  | 0.00000246  |
| 0           | 0           | 8.14E-08    |
| 0           | 0           | 0           |
| 0.000133121 | 0.0000465   | 0.000195568 |
| 0           | 0           | 0           |
| 0           | 0           | 0           |
| 0.000173987 | 0.000156603 | 0.000231421 |
| 0           | 0           | 0           |
| 0           | 0           | 0           |
| 0           | 0           | 6.69E-08    |
| 0.000188891 | 0.000276559 | 0.000334804 |
| 0.0000207   | 0.0000101   | 0.00000877  |
| 0.00000252  | 0.00000247  | 0.00000335  |
| 0           | 0           | 0           |
| 0           | 0           | 0           |
| 0           | 0           | 0           |
| 0           | 0           | 0           |
| 0           | 0           | 0           |
| 0.000000643 | 0.000000761 | 0.000000911 |
| 0.00012183  | 0.0000437   | 0.000174397 |
| 0           | 0           | 0           |
| 0           | 0           | 0           |
| 0.0000002   | 0           | 7.75E-08    |
| 0           | 0.00000148  | 0.00000123  |
| 0.00000174  | 0.00000108  | 0.00000254  |
| 0           | 0           | 0           |
| 0           | 0           | 0           |
| 0           | 0           | 0           |
| 0.0000101   | 0.000000173 | 0           |
| 6.82E-08    | 0           | 7.69E-08    |
| 0.00010455  | 0.0000399   | 0.000109094 |
| 0           | 0           | 0           |
| 0           | 0           | 0           |
| 0           | 0           | 0           |
| 0           | 0           | 0           |
| 0           | 0           | 0           |
| 0           | 0           | 0           |
| 0.000000172 | 0           | 0.000000272 |
| 0.00038235  | 0.000341672 | 0.000433688 |
| 0.0000778   | 0.000129632 | 0.00000745  |

|             |             |             |
|-------------|-------------|-------------|
| 0           | 0           | 0.000000461 |
| 0           | 0           | 0           |
| 0           | 0           | 0           |
| 0.00000668  | 0.00000494  | 0.000000108 |
| 0           | 0           | 0           |
| 0           | 0           | 0           |
| 0           | 0           | 0           |
| 0           | 0           | 0           |
| 0           | 0           | 0           |
| 0           | 0           | 0           |
| 0           | 0           | 0           |
| 0.0000101   | 0.000000173 | 0           |
| 0.00000882  | 0.000000169 | 0           |
| 0           | 0           | 0           |
| 0           | 0           | 0           |
| 0           | 0           | 0           |
| 0.000000103 | 0           | 0           |
| 0           | 0           | 0           |
| 0.0000107   | 0.000000204 | 0           |
| 0.00000224  | 0.00000241  | 0.00000346  |
| 0.000000108 | 0           | 0           |
| 0.000305617 | 0.000342979 | 0.000332251 |
| 0           | 0           | 0           |
| 0.00000157  | 0.00000153  | 0.00000113  |
| 0           | 0.00000178  | 0.00000147  |
| 0           | 0           | 0           |
| 0           | 0           | 0           |
| 0           | 0           | 0           |
| 0           | 0           | 0           |
| 0           | 0           | 0           |
| 0           | 0           | 0           |
| 0           | 0           | 0           |
| 0           | 0           | 0           |
| 0           | 0           | 0           |
| 0           | 0           | 0           |
| 0.00120316  | 0.00187096  | 0.00107531  |
| 0           | 0           | 0           |
| 0           | 0           | 0           |
| 0           | 0           | 0           |
| 0           | 0           | 0           |
| 0           | 0           | 0           |
| 0.000000481 | 0.000000664 | 0.000000667 |
| 0.00000742  | 0.00000298  | 0.00000345  |
| 0           | 0           | 0           |
| 0.00000687  | 0.000000139 | 0           |
| 0.00000687  | 0.000000139 | 0           |
| 0.00000249  | 0.00000054  | 0.00000196  |
| 0           | 0           | 0           |

|             |             |             |
|-------------|-------------|-------------|
| 0           | 0           | 0           |
| 0           | 0           | 0           |
| 0           | 0           | 0           |
| 0           | 0           | 0           |
| 0           | 0           | 0           |
| 0.00589356  | 0.00102947  | 0           |
| 0.00000672  | 0.000000139 | 0           |
| 0           | 0.000000362 | 0.000000196 |
| 0.00000103  | 0.00000113  | 0.00000143  |
| 0.00000163  | 0.00000113  | 0.000000923 |
| 0           | 0           | 0           |
| 0           | 0           | 0           |
| 0.0000841   | 0.0000343   | 0.000093    |
| 0           | 0           | 0           |
| 0.00000683  | 0.00000908  | 0.00000714  |
| 0.000366288 | 0.000397235 | 0.000346705 |
| 0.000366105 | 0.00039717  | 0.000346665 |
| 0           | 0           | 0           |
| 0.00000035  | 0.000000409 | 0.00000169  |
| 0           | 0           | 0           |
| 0           | 0           | 0.000000824 |
| 0.0000363   | 0.0000234   | 0.0000874   |
| 0.00000286  | 0.00000185  | 0.00000282  |
| 0           | 0           | 0           |
| 0.00000141  | 0.00000133  | 0.00000136  |
| 0           | 0           | 0           |
| 0.000181354 | 0.00010409  | 0.000346734 |
| 0           | 0           | 0           |
| 0.00000867  | 0.00000283  | 0.00000313  |
| 0           | 0           | 0           |
| 0.0000559   | 0.0000304   | 0.0000666   |
| 0           | 0           | 0           |
| 0.00000435  | 0.0000025   | 0.00000796  |
| 0.000110326 | 0.0000525   | 0.000237795 |
| 0           | 0           | 0           |
| 0.0000117   | 0.00000312  | 0.00000217  |
| 0           | 0           | 0           |
| 0.0000002   | 0.000000563 | 0.00000239  |
| 0.00000861  | 0.00000322  | 0.00000331  |
| 0.0000806   | 0.0000403   | 0.000156979 |
| 0           | 0           | 0           |
| 0           | 0           | 0           |
| 0.0000564   | 0.0000269   | 0.0000403   |
| 0           | 0           | 0           |
| 0           | 0           | 0           |
| 0           | 0           | 0           |
| 0           | 0           | 0           |

|             |             |             |
|-------------|-------------|-------------|
| 0.000000426 | 0.00000111  | 0.00000313  |
| 0           | 0           | 0           |
| 0           | 0           | 0           |
| 0           | 0           | 0           |
| 0.00000314  | 0.00000245  | 0.00000101  |
| 0           | 0.000000298 | 0           |
| 0           | 0           | 0           |
| 0           | 0           | 0           |
| 0.0000599   | 0.0000197   | 0.000148481 |
| 0           | 0           | 0           |
| 0           | 0           | 0           |
| 0           | 0           | 0           |
| 0.000000516 | 0.00000161  | 0.00000428  |
| 0.0000789   | 0.000121174 | 0.00000684  |
| 0           | 0           | 0           |
| 0           | 0           | 0           |
| 0.0000307   | 0.0000547   | 0.00000363  |
| 0.000044    | 0.0000329   | 0.0000515   |
| 0.000167721 | 0.000093    | 0.000337047 |
| 9.44E-08    | 0           | 0.000000132 |
| 0           | 0           | 0           |
| 0.0000681   | 0.0000314   | 0.0000522   |
| 0.00000794  | 0.00000664  | 0.0000133   |
| 0           | 0           | 0           |
| 0.0000047   | 0.00000676  | 0.00000537  |
| 0           | 0           | 0           |
| 0.000127226 | 0.000130887 | 0.000272775 |
| 0.000000251 | 0.000000386 | 0.000000316 |
| 0           | 0           | 0           |
| 0           | 0           | 0           |
| 0           | 0           | 0           |
| 0           | 0           | 0           |
| 0           | 0           | 0           |
| 0.0000679   | 0.000033    | 0.0000933   |
| 0.0000268   | 0.0000125   | 0.00000972  |
| 0           | 0           | 0           |
| 0.0000121   | 0.00000284  | 0.00000206  |
| 0           | 0           | 0           |
| 0.00000415  | 0.00000594  | 0.0000076   |
| 0           | 0           | 0           |
| 0           | 0           | 0           |
| 0           | 0           | 0           |
| 0           | 0           | 0           |
| 0.000000141 | 0.000000492 | 0.00000101  |
| 0           | 0           | 0           |
| 0           | 0           | 0           |
| 0           | 0           | 0           |

|             |             |             |
|-------------|-------------|-------------|
| 0           | 0           | 0           |
| 0.0000039   | 0           | 0           |
| 0.00000207  | 0.00000298  | 0.00000561  |
| 0           | 0           | 0           |
| 0           | 0           | 0           |
| 0           | 0           | 0           |
| 0           | 0           | 0           |
| 0           | 0           | 0           |
| 0.00010863  | 0.0000539   | 0.000190723 |
| 0           | 0           | 0           |
| 0.00014648  | 0.0000737   | 0.000306841 |
| 0           | 0           | 0           |
| 0           | 0           | 0           |
| 0           | 0           | 0           |
| 0.00000127  | 0.000000987 | 0.00001     |
| 0.0000154   | 0.0000246   | 0.00000477  |
| 0           | 0           | 0           |
| 0.000000679 | 0.00000088  | 0.00000115  |
| 0           | 0           | 0.000000338 |
| 0           | 0           | 0           |
| 0.00009     | 0.0000439   | 0.0000676   |
| 0.00000645  | 0.00000244  | 0.00000333  |
| 0.0000178   | 0.00000155  | 0.0000618   |
| 0           | 0           | 0           |
| 0           | 0           | 0           |
| 0.00000345  | 0.00000349  | 0.0000019   |
| 0           | 0           | 0           |
| 0           | 0           | 0.000000795 |
| 0           | 0           | 0           |
| 0           | 0           | 0           |
| 0.00000432  | 0.00000195  | 0.00000175  |
| 0           | 0           | 0           |
| 0           | 0           | 0           |
| 0           | 0           | 0           |
| 0.000000612 | 0.000000645 | 0.00000418  |
| 0           | 0           | 0           |
| 0           | 0           | 0           |
| 0.000000115 | 0.000000501 | 0.00000114  |
| 0.000000604 | 0.000000966 | 0.0000018   |
| 0           | 0           | 0           |
| 0           | 0           | 0           |
| 0           | 0           | 0           |
| 0.0000759   | 0.0000496   | 0.0000591   |
| 0           | 0           | 0           |
| 0           | 0           | 0           |
| 0.0000759   | 0.0000406   | 0.0000582   |
| 0           | 0           | 0           |

|             |             |             |
|-------------|-------------|-------------|
| 0           | 0           | 0           |
| 0           | 0           | 0           |
| 0           | 0           | 0           |
| 0.0000813   | 0.00012747  | 0.00000761  |
| 0           | 0           | 0           |
| 0           | 0           | 0           |
| 0           | 0           | 0           |
| 0           | 0           | 0           |
| 0           | 0           | 0           |
| 0           | 0           | 0           |
| 0           | 0           | 0           |
| 0           | 0           | 0           |
| 0.037626    | 0.0365606   | 0.0227863   |
| 1.64E-08    | 4.85E-08    | 3.43E-08    |
| 0.00000328  | 0.00000345  | 0.00000261  |
| 0.00000253  | 0.00000182  | 0.00000166  |
| 0           | 0           | 0           |
| 0           | 0           | 0           |
| 0           | 0           | 0           |
| 0           | 0           | 0           |
| 0           | 0           | 0           |
| 0           | 0           | 0           |
| 0           | 0           | 0           |
| 0           | 0           | 0.000000314 |
| 0           | 0           | 0           |
| 0.00000111  | 0.00000123  | 0.000000678 |
| 0           | 0           | 0           |
| 0           | 0           | 0           |
| 0           | 0           | 0           |
| 0           | 0           | 0           |
| 0           | 0           | 0.00000134  |
| 0           | 0           | 0           |
| 0           | 0           | 0           |
| 0           | 0           | 0           |
| 0.00000454  | 0.00000352  | 0.0000038   |
| 0.00000808  | 0.00000445  | 0.00000174  |
| 0           | 0           | 0           |
| 0           | 0           | 0           |
| 0           | 0           | 0           |
| 0           | 0           | 0           |
| 0.0000419   | 0.0000199   | 0.0000864   |
| 0           | 0           | 0           |
| 0.000000172 | 0.000000139 | 0.000000256 |
| 0           | 0           | 0           |
| 0           | 0           | 0           |
| 0           | 0           | 0           |

|             |             |             |
|-------------|-------------|-------------|
| 0.0000547   | 0.000026    | 0.0000472   |
| 0.000000743 | 0           | 0.00000132  |
| 0.000003    | 0.00000366  | 0.00000541  |
| 0           | 0           | 0           |
| 0           | 0           | 0           |
| 0.00010936  | 0.0000738   | 0.000017    |
| 0.0000697   | 0.0000324   | 0.0000517   |
| 0           | 0           | 0           |
| 0           | 0           | 0           |
| 0           | 0           | 0           |
| 0.00000121  | 0.000000362 | 0.00000151  |
| 0.0000115   | 0.00000171  | 0.0000112   |
| 0.00000786  | 0.0000025   | 0           |
| 0           | 0           | 0           |
| 0           | 0           | 0           |
| 0.000000242 | 0.000000221 | 0.000000237 |
| 0.00000675  | 0.00000902  | 0.00000491  |
| 0           | 0           | 0           |
| 0.0000582   | 0.0000257   | 0.0000444   |
| 0.000027    | 0.0000389   | 0.00000578  |
| 0           | 0           | 0           |
| 0.000000122 | 0           | 0           |
| 0           | 0           | 0           |
| 0.00000508  | 0.00000479  | 0.00000464  |
| 0           | 0           | 0           |
| 0.00000193  | 0           | 0           |
| 0.000008    | 0.00000562  | 0.0000089   |
| 0.00000279  | 0.00000278  | 0.00000245  |
| 0           | 0           | 0           |
| 0.00000496  | 0.00000507  | 0.00000341  |
| 0           | 0           | 0           |
| 0.00000563  | 0.00000371  | 0.00000376  |
| 0.00000284  | 0.00000173  | 0.00000356  |
| 0.0000179   | 0.0000311   | 0.00000485  |
| 0.0000143   | 0.00000463  | 0.000000507 |
| 3.91E-08    | 0.000000117 | 0           |
| 0           | 0           | 0           |
| 0           | 0           | 0           |
| 0           | 0           | 0           |
| 0.000000245 | 0.000000795 | 0.00000148  |
| 0           | 0           | 0           |
| 0.00000785  | 0.00000201  | 0.00000221  |
| 0           | 0           | 0           |
| 0           | 0           | 0           |
| 0.000017    | 0.00000986  | 0.00000547  |
| 0           | 0           | 0           |
| 0           | 0           | 0           |



|             |             |             |
|-------------|-------------|-------------|
| 0.0000892   | 0.0000375   | 0.0000572   |
| 0.00000357  | 0.00000174  | 0.000016    |
| 0.0000381   | 0.0000246   | 0.00000639  |
| 0           | 0           | 0           |
| 0           | 0           | 0           |
| 0.0000175   | 0.0000235   | 0.00000578  |
| 0.00000342  | 0.00000204  | 0.00000417  |
| 0           | 0           | 0           |
| 0.00000148  | 0.000000278 | 0.00000526  |
| 0.0000628   | 0.00001     | 0.0000101   |
| 0.000000177 | 0.000000172 | 0           |
| 0.0000089   | 0.0000072   | 0.00000457  |
| 0           | 0           | 0.000000146 |
| 0.00000361  | 0.00000234  | 0.00000366  |
| 0           | 0           | 0           |
| 0           | 0           | 0           |
| 0.0000726   | 0.0000332   | 0.000103814 |
| 0           | 0           | 0           |
| 0           | 0           | 0           |
| 0           | 0           | 0           |
| 0           | 0           | 0           |
| 0           | 0           | 0           |
| 0           | 0           | 0           |
| 0.0000031   | 0.00000282  | 0.00000258  |
| 0           | 0           | 0           |
| 0           | 0           | 0           |
| 0           | 0           | 0           |
| 0.000000738 | 0.00000107  | 0.00000163  |
| 0.000000273 | 0.000000922 | 0.00000119  |
| 0           | 0           | 0           |
| 0.000000222 | 0.0000004   | 0.000000304 |
| 0           | 0           | 0           |
| 0           | 0           | 0           |
| 0.0000283   | 0.0000162   | 0.00000656  |
| 0           | 0           | 0           |
| 0           | 0           | 0           |
| 0           | 0           | 0           |
| 0           | 0           | 0           |
| 0.00000499  | 0.00000132  | 0.00000206  |
| 0           | 0           | 0           |
| 0.00000177  | 0.000000454 | 0.00000041  |
| 0.00000244  | 0.00000156  | 0.00000125  |
| 0           | 0           | 0           |
| 0.000000219 | 0.000000349 | 0.000000314 |
| 0           | 0           | 0           |
| 0.0000328   | 0.0000289   | 0.00000448  |
| 0           | 0           | 0           |

|             |             |             |
|-------------|-------------|-------------|
| 0           | 0           | 0           |
| 0.000000218 | 0.000000268 | 0.000000337 |
| 0           | 0           | 0           |
| 0           | 0           | 0           |
| 0           | 0           | 0           |
| 0.000000676 | 0.000000801 | 0.00000024  |
| 0.000000192 | 0.000000342 | 0.000000255 |
| 0.000000191 | 0.000000351 | 0.000000268 |
| 0.000000354 | 0.000000324 | 0.000000205 |
| 0.000000192 | 0.000000339 | 0.000000249 |
| 0.000000156 | 0.00000026  | 0.000000213 |
| 0           | 0           | 0           |
| 0.000000331 | 0.000000166 | 0.000000998 |
| 0           | 0           | 0           |
| 0.000000159 | 0.000000118 | 0.00000007  |
| 0           | 0           | 0           |
| 0.000000195 | 0.000000381 | 0.000000274 |
| 0.000000201 | 5.61E-08    | 0.000000112 |
| 0.000648079 | 0.0000959   | 0.000092    |
| 0           | 0.000000564 | 0           |
| 0           | 0.000000564 | 0           |
| 0           | 0           | 0           |
| 0           | 0           | 0           |
| 0           | 0           | 0           |
| 0.000000208 | 0.000000276 | 0.000000155 |
| 0.000000208 | 0.000000276 | 0.000000155 |
| 9.51E-08    | 2.91E-08    | 0.000000139 |
| 0           | 0           | 0           |
| 0.000000167 | 0.000000316 | 0.000000195 |
| 0.000000355 | 0.000000323 | 0.000000147 |
| 0           | 0           | 0           |
| 0.00000014  | 8.13E-08    | 0.000000122 |
| 0.00000014  | 8.13E-08    | 0.000000122 |
| 4.39E-08    | 6.62E-08    | 9.65E-08    |
| 0           | 0.000000365 | 0           |
| 0.000000124 | 0.000000274 | 0.000000283 |
| 0.000000164 | 0.000000074 | 8.81E-08    |
| 0.000000846 | 0.000000296 | 0.000000957 |
| 0           | 0           | 0           |
| 0           | 0           | 0           |
| 0           | 0.000000674 | 0           |
| 0.000000179 | 5.73E-08    | 0.000000117 |
| 0.000000184 | 0.000000165 | 0.000000225 |
| 0           | 0           | 0           |
| 0.000000186 | 5.86E-08    | 0.00000001  |
| 0.000000182 | 0.000000133 | 0.000000123 |
| 0.000000513 | 0.000000426 | 0.000000117 |

|             |             |             |
|-------------|-------------|-------------|
| 0.000000182 | 6.13E-08    | 0.00000012  |
| 0.000509391 | 0           | 0           |
| 0.000000206 | 0.000000352 | 0.000000251 |
| 0.000000232 | 7.48E-08    | 0.000000124 |
| 0.000000232 | 7.48E-08    | 0.000000124 |
| 0           | 0           | 0           |
| 0.000000163 | 0.000000105 | 0.000000114 |
| 0.000000326 | 0.000000371 | 0.000000412 |
| 0           | 0.000000464 | 0           |
| 0           | 0.000000464 | 0           |
| 0.000000201 | 9.62E-08    | 0.000000145 |
| 0.000000129 | 0.000000212 | 0.000000115 |
| 0.00000184  | 0.00000135  | 0.00000102  |
| 0           | 0           | 0           |
| 0           | 0.000000583 | 0           |
| 0.000000124 | 6.63E-08    | 7.02E-08    |
| 0           | 0           | 0           |
| 0.000000141 | 0           | 8.01E-08    |
| 0.00000265  | 0.00000193  | 0.00000278  |
| 0.000000125 | 0           | 0           |
| 0.00000171  | 0.00000113  | 0.00000103  |
| 0           | 0           | 0           |
| 0.000000322 | 0           | 0           |
| 0           | 0           | 0           |
| 0           | 0           | 0           |
| 0.000000411 | 0.000000588 | 0.00000177  |
| 0.00000178  | 0.00000244  | 0.00000121  |
| 0.000000109 | 5.53E-08    | 8.21E-08    |
| 0.0000241   | 0.0000182   | 0.00000532  |
| 0.0000182   | 0.0000242   | 0.00000673  |
| 0.00000386  | 0.00000304  | 0.00000484  |
| 0.000128222 | 0.000112074 | 0.00012792  |
| 0           | 5.07E-08    | 0.000000106 |
| 0           | 0           | 0           |
| 0           | 0           | 0           |
| 0           | 0           | 0           |
| 0.000000108 | 6.94E-08    | 0.000000086 |
| 0.000000121 | 7.29E-08    | 0.000000102 |
| 0.00000014  | 0           | 3.82E-08    |
| 0           | 0           | 0           |
| 0           | 0           | 0           |
| 0           | 0           | 0           |
| 0           | 0           | 0           |
| 0.000000253 | 3.14E-08    | 0.000000154 |
| 0.000000118 | 4.69E-08    | 0.000000106 |
| 0.000000194 | 0           | 0           |
| 0.0000252   | 0.0000188   | 0.00000628  |

|             |             |             |
|-------------|-------------|-------------|
| 0.00000312  | 0.00000201  | 0.00000599  |
| 0.000000357 | 0.000000145 | 0           |
| 0.00000388  | 0.00000311  | 0.0000134   |
| 9.08E-08    | 0           | 5.55E-08    |
| 0           | 0           | 0           |
| 0           | 0           | 0           |
| 0           | 0.000000165 | 0           |
| 0           | 0           | 0           |
| 0.000000245 | 0           | 0           |
| 0           | 0           | 0           |
| 0.0000231   | 0.0000163   | 0.00000536  |
| 0           | 0           | 0           |
| 0.000000158 | 0           | 0           |
| 0           | 0           | 0           |
| 0.000000221 | 0           | 0           |
| 0.000000206 | 0           | 0           |
| 0.000000106 | 0           | 0.000000086 |
| 0.0000141   | 0.0000113   | 0.0000136   |
| 0.000000249 | 0.000000146 | 0.000000567 |
| 0           | 0           | 0           |
| 0           | 0           | 0           |
| 0.0000296   | 0.0000215   | 0.0000109   |
| 0.0000296   | 0.0000215   | 0.0000109   |
| 0           | 0           | 0           |
| 0.0000103   | 0.0000118   | 0.00000725  |
| 0           | 0           | 0           |
| 0           | 0           | 0           |
| 0           | 0.000000232 | 0           |
| 0.000000145 | 0           | 0           |
| 0           | 0.00000023  | 0           |
| 0.000000213 | 0           | 0           |
| 0.000000323 | 0.00000104  | 0.000000849 |
| 0           | 0           | 0           |
| 0.0000002   | 0           | 0           |
| 0.00000438  | 0.00000553  | 0.00000544  |
| 0           | 0           | 0           |
| 0.000000122 | 0           | 0           |
| 0.000000196 | 0           | 0           |
| 0           | 0           | 0           |
| 0           | 0.000000218 | 0           |
| 0.000000199 | 0           | 0           |
| 0.00000187  | 0.00000804  | 0.00000185  |
| 0.0000172   | 0.00000625  | 0.00000706  |
| 0.0000172   | 0.00000624  | 0.00000706  |
| 0.00000178  | 0.00000102  | 0.0000031   |
| 0           | 0.000177032 | 0           |
| 0.000000166 | 0           | 0           |

|             |             |             |
|-------------|-------------|-------------|
| 0.000000166 | 0           | 0           |
| 0           | 0.000000332 | 0           |
| 0           | 0.000000267 | 0           |
| 0.000000969 | 0.000001    | 0.000000963 |
| 0           | 0.000000254 | 0           |
| 0           | 0.000000254 | 0           |
| 0           | 0           | 0           |
| 0.000000179 | 0           | 0           |
| 0           | 0           | 0           |
| 0.000000162 | 0           | 0           |
| 0.000000019 | 0           | 0           |
| 0           | 0           | 0           |
| 0           | 0           | 0           |
| 0           | 0           | 0           |
| 0           | 0.000000185 | 0           |
| 0           | 0           | 0           |
| 0.000000151 | 0           | 0           |
| 0           | 0           | 0           |
| 0           | 9.11E-08    | 0           |
| 0           | 0           | 0           |
| 0           | 0           | 0           |
| 0           | 0.000000196 | 0           |
| 0.000000195 | 0.000000412 | 0.000000163 |
| 0           | 0           | 0           |
| 0           | 0           | 0           |
| 0           | 0           | 0           |
| 0           | 0.000000186 | 0           |
| 0           | 0           | 0           |
| 3.06E-08    | 0.000000297 | 0.000000167 |
| 0           | 0.000000216 | 0           |
| 0.0000147   | 0.00000432  | 0.0000086   |
| 0.0000147   | 0.00000432  | 0.0000086   |
| 0           | 0           | 0           |
| 0.0000154   | 0.00000459  | 0.00000847  |
| 0           | 0           | 0           |
| 0           | 0           | 0           |
| 9.07E-08    | 0           | 0           |
| 0           | 0.000000159 | 0           |
| 0           | 8.99E-08    | 0           |
| 0           | 0.000000237 | 0           |
| 0           | 0           | 0           |
| 0           | 0           | 0           |
| 0           | 0.000000139 | 0           |
| 0           | 0           | 0           |
| 0           | 0           | 0           |
| 0.000000102 | 0           | 0           |
| 0           | 0           | 0           |

|             |             |             |
|-------------|-------------|-------------|
| 0           | 0           | 0           |
| 0.000000112 | 0           | 0           |
| 0.00000344  | 0.00000327  | 0.00000369  |
| 0           | 0           | 0           |
| 0.00000607  | 0.00000268  | 0.00000336  |
| 0           | 0           | 0           |
| 0           | 0.000000121 | 0           |
| 0           | 0.000000188 | 0           |
| 0.000683203 | 0           | 0           |
| 0.00001     | 0.00000992  | 0.00000394  |
| 0           | 0.000000151 | 0           |
| 0           | 0           | 0           |
| 0.00000107  | 0.00000168  | 0.00000594  |
| 0           | 0           | 0           |
| 0.000000493 | 0.000000352 | 0.00000319  |
| 0           | 0.000000157 | 0           |
| 0           | 0.000000147 | 0           |
| 0.00000762  | 0.00000304  | 0.00000839  |
| 0.0000127   | 0.0000072   | 0.00000455  |
| 0           | 0.000000129 | 0           |
| 0.000000616 | 0.000000604 | 0.000000717 |
| 0.0000014   | 0.000000394 | 0.000000418 |
| 0.000000101 | 0           | 0           |
| 0.000000479 | 0.00000047  | 0.000000557 |
| 0.000000135 | 0           | 0           |
| 0.00000612  | 0.00000797  | 0.00000345  |
| 0           | 0.00000016  | 0           |
| 0.00000754  | 0.00000429  | 0.0000078   |
| 0           | 9.33E-08    | 0           |
| 0.000000585 | 0.000000987 | 0.000000715 |
| 0           | 0           | 0           |
| 0.0000203   | 0.00000897  | 0.0000159   |
| 0           | 0.000000155 | 0           |
| 0.00000171  | 0.000000715 | 0.00000647  |
| 0.0000978   | 0           | 0           |
| 0.0000146   | 0.00000453  | 0.000000137 |
| 5.36E-08    | 0.000000209 | 0.000000182 |
| 0           | 0.00000017  | 0           |
| 0.0000114   | 0.00000273  | 0.00000471  |
| 0.00000406  | 0.00000335  | 0.0000121   |
| 0           | 5.76E-08    | 0           |
| 0.00000115  | 0.000000394 | 0.000000281 |
| 0.00000176  | 0.000000211 | 0.00000131  |
| 9.51E-08    | 0           | 0           |
| 8.08E-08    | 0           | 0           |
| 0.000000119 | 0           | 0           |
| 0.0000137   | 0.00000328  | 0.00000314  |

|             |             |             |
|-------------|-------------|-------------|
| 0.00000555  | 0.00000248  | 0.00000532  |
| 0.000000111 | 0           | 0           |
| 7.22E-08    | 0           | 0           |
| 0.000000195 | 0           | 0           |
| 0.000000114 | 0           | 0           |
| 0.00000569  | 0.00000234  | 0.0000052   |
| 0.000000155 | 0           | 0           |
| 7.84E-08    | 0           | 0           |
| 0           | 0.000000111 | 0           |
| 0.000000227 | 0           | 0           |
| 0           | 6.61E-08    | 0           |
| 0.00000018  | 0.000000143 | 0.0000013   |
| 0.000000215 | 0           | 0           |
| 0.000000101 | 0           | 0           |
| 8.47E-08    | 0           | 0           |
| 0.000000191 | 0           | 0           |
| 0.000000106 | 0           | 0           |
| 7.89E-08    | 0           | 0           |
| 0           | 0           | 0           |
| 8.12E-08    | 0           | 0           |
| 7.66E-08    | 0           | 0           |
| 0.000000181 | 0           | 0           |
| 7.36E-08    | 0           | 0           |
| 0.000000307 | 0           | 0.000000187 |
| 0.000000151 | 0           | 0           |
| 0.000000221 | 0           | 0           |
| 3.77E-08    | 0           | 0           |
| 0.000000186 | 0           | 0           |
| 0.0000532   | 0.000022    | 0.0000107   |
| 9.85E-08    | 0           | 0           |
| 0.000000179 | 0           | 0           |
| 0.000000285 | 0           | 0           |
| 0.000000285 | 0           | 0           |
| 0.000000267 | 0           | 0           |
| 0.000000245 | 0           | 0           |
| 0.000000216 | 0           | 0           |
| 3.16E-08    | 0           | 0           |
| 3.16E-08    | 0           | 0           |
| 0.000000144 | 0           | 0           |
| 0.000000223 | 0           | 9.06E-08    |
| 0.000000176 | 0           | 0           |
| 0.000000159 | 0           | 0           |
| 0.00000013  | 0           | 0           |
| 0.000000128 | 0           | 0           |
| 0.000000128 | 0           | 0           |
| 0.000000216 | 0           | 0           |
| 7.44E-08    | 0           | 0           |

|             |             |             |
|-------------|-------------|-------------|
| 4.37E-08    | 0           | 0           |
| 0.000000133 | 0           | 0           |
| 0.000000257 | 0           | 0.000000136 |
| 0.000000285 | 0           | 0           |
| 0.000000318 | 0           | 0.000000174 |
| 0.000000152 | 0           | 0           |
| 0.000000129 | 0           | 0           |
| 0.000000262 | 0           | 0.000000104 |
| 8.97E-08    | 0           | 0           |
| 8.97E-08    | 0           | 0           |
| 0           | 0           | 0           |
| 0.000000287 | 0           | 0.000000161 |
| 0.000000287 | 0           | 0.000000161 |
| 6.96E-08    | 0           | 0           |
| 6.96E-08    | 0           | 0           |
| 6.91E-08    | 0           | 0           |
| 0.000000121 | 0           | 0           |
| 0.000000155 | 0           | 0           |
| 0.000000116 | 0           | 0           |
| 2.13E-08    | 0           | 0           |
| 0.000000138 | 0           | 0           |
| 0.000000143 | 0           | 0           |
| 8.71E-08    | 0           | 0           |
| 0.000000119 | 0           | 0           |
| 3.33E-08    | 0           | 0           |
| 0.000000365 | 0           | 0.000000219 |
| 0.000000111 | 0           | 0           |
| 0           | 0           | 0           |
| 0.000000204 | 0           | 0.000000194 |
| 0.000000106 | 0           | 0           |
| 4.57E-08    | 0           | 0           |
| 0.000000187 | 0           | 0.000000186 |
| 0.000000168 | 0           | 0.000000179 |
| 0.00000016  | 0           | 0           |
| 0.00000016  | 0           | 0           |
| 0.000556614 | 0           | 0.000233756 |
| 3.69E-08    | 0           | 0           |
| 0.00000017  | 0           | 0.000000169 |
| 0.000000056 | 0           | 0           |
| 0.000000457 | 0.000000189 | 0.000000521 |
| 0.00000029  | 0           | 0.000000217 |
| 0.000000101 | 0           | 0           |
| 0.0000239   | 0.00000922  | 0.00000465  |
| 0.000000232 | 0           | 0.00000018  |
| 3.11E-08    | 0           | 0           |
| 3.11E-08    | 0           | 0           |
| 0.00000171  | 0.00000244  | 0.00000437  |



|             |             |             |
|-------------|-------------|-------------|
| 0.000000133 | 0           | 0           |
| 0.000000207 | 0           | 0.000000174 |
| 0.000000445 | 0.00000046  | 0.000001    |
| 0           | 0           | 0           |
| 0.000000188 | 0           | 0.000000174 |
| 0           | 0           | 0           |
| 0           | 0           | 0           |
| 0.00000016  | 0           | 0.000000163 |
| 0.000000325 | 0           | 0.000000126 |
| 6.08E-08    | 0           | 0.000000131 |
| 0.000000134 | 0           | 0.000000172 |
| 3.25E-08    | 0           | 0           |
| 0.00000155  | 0.00000121  | 0.000000474 |
| 3.12E-08    | 0           | 0           |
| 0.000000246 | 0           | 0.000000106 |
| 0.000000136 | 0           | 0.000000151 |
| 0.000000136 | 0           | 0.000000151 |
| 7.09E-08    | 0           | 0           |
| 0.00000332  | 0.00000449  | 0.00000516  |
| 6.65E-08    | 0           | 0           |
| 5.37E-08    | 0.00000021  | 0.000000187 |
| 0.000000571 | 0.0000011   | 0.000000679 |
| 3.11E-08    | 0           | 0           |
| 0           | 0           | 0           |
| 3.33E-08    | 0           | 0           |
| 8.05E-08    | 0.000000231 | 0.000000847 |
| 0.00000199  | 0.00000122  | 0.000000627 |
| 0.00000118  | 0.00000611  | 0.00000115  |
| 0.0000158   | 0.00000483  | 0.000000135 |
| 0           | 0           | 0           |
| 0           | 0           | 0           |
| 0           | 0           | 0           |
| 0           | 0           | 0           |
| 0           | 0           | 0           |
| 0.00000023  | 0.000000309 | 0.00000229  |
| 0           | 0           | 0           |
| 0           | 0           | 0           |
| 0.00000159  | 0.00000124  | 0.000000506 |
| 0.000000353 | 0.000000221 | 0.000000237 |
| 0.00000013  | 0.000000171 | 0.000000773 |
| 0           | 0           | 0           |
| 0           | 0           | 0           |
| 0           | 0           | 0           |
| 0           | 0           | 0           |
| 6.45E-08    | 0.000000217 | 0.000000587 |
| 0.000000338 | 0.000000317 | 0.00000193  |
| 9.45E-08    | 0.000000194 | 0.000000634 |

|          |             |             |
|----------|-------------|-------------|
| 0        | 0           | 0           |
| 0        | 0.000000157 | 0.000000537 |
| 5.41E-08 | 0           | 0.00000019  |

| Vanderbilt-patient_Pre-FMT | Vanderbilt-patient_Post-FMT2 | Vanderbilt-donor_Donor |
|----------------------------|------------------------------|------------------------|
| 0.0000409                  | 0.00013429                   | 0.000000614            |
| 0.0000334                  | 0.00010209                   | 0.000000578            |
| 0.0000374                  | 0.000125777                  | 0.000000704            |
| 0.0000374                  | 0.000125777                  | 0.000000704            |
| 0.0000347                  | 0.000115519                  | 0.000000585            |
| 0.0000312                  | 0.0000991                    | 0.000000707            |
| 0.0000357                  | 0.000114832                  | 0.000000618            |
| 0.0000333                  | 0.000110098                  | 0.000000717            |
| 0.000178974                | 0.0000539                    | 0.00000067             |
| 0.0000342                  | 0.000113027                  | 0.000000608            |
| 0.0000328                  | 0.000110807                  | 0.000000729            |
| 0.0000377                  | 0.000124941                  | 0.000000726            |
| 0.0000307                  | 0.0000992                    | 0.000000545            |
| 0.0000333                  | 0.000112095                  | 0.000000734            |
| 0.00020206                 | 0.0000581                    | 0.00000085             |
| 0.0255422                  | 0.0816828                    | 0.000480156            |
| 0.0000394                  | 0.000126368                  | 0.000000738            |
| 0.000255985                | 0.0000672                    | 0.000000807            |
| 0.000200912                | 0.0000571                    | 0.000000848            |
| 0.00025195                 | 0.0000691                    | 0.00000101             |
| 0.0000332                  | 0.000113072                  | 0.000000753            |
| 0.000197526                | 0.000056                     | 0.000000886            |
| 0.000197615                | 0.000056                     | 0.000000891            |
| 0.0000495                  | 0.000159374                  | 0.00000113             |
| 0.0000336                  | 0.000106085                  | 0.000000691            |
| 0.0000401                  | 0.00013553                   | 0.000000911            |
| 0.00020146                 | 0.0000544                    | 0.000000923            |
| 0.00020146                 | 0.0000544                    | 0.000000923            |
| 0.0000317                  | 0.000100434                  | 0.000000565            |
| 0.0000336                  | 0.00010641                   | 0.000000698            |
| 0.0000423                  | 0.000140636                  | 0.000000947            |
| 0.0000402                  | 0.000133519                  | 0.000000675            |
| 0.0000402                  | 0.000133519                  | 0.000000675            |
| 0.0000341                  | 0.000107366                  | 0.000000682            |
| 0.0000321                  | 0.000102132                  | 0.000000722            |
| 0.000199596                | 0.0000522                    | 0.000000867            |
| 0.0000409                  | 0.000132119                  | 0.000000841            |
| 0.0000389                  | 0.000124868                  | 0.000000811            |
| 0.0000389                  | 0.000124868                  | 0.000000811            |
| 0.0000322                  | 0.000113787                  | 0.000000776            |
| 0.0000322                  | 0.000113787                  | 0.000000776            |
| 0.000206459                | 0.0000589                    | 0.000000769            |
| 0.0000477                  | 0.00000307                   | 5.94E-08               |
| 0.0000486                  | 0.00000784                   | 0.000000215            |
| 0.000192473                | 0.0000484                    | 0.000000856            |
| 0.000216503                | 0.0000584                    | 0.000000909            |

|             |             |             |
|-------------|-------------|-------------|
| 0.0000436   | 0.00000485  | 0.000000107 |
| 0.000201687 | 0.0000588   | 0.000000992 |
| 0.0000506   | 0.000009    | 0.000000155 |
| 0.0000502   | 0.00000384  | 8.04E-08    |
| 0.0000304   | 0.0000955   | 0.000000691 |
| 0.0000153   | 0.00000274  | 5.11E-08    |
| 0.0000683   | 0.0000069   | 0.000000153 |
| 0.000223666 | 0.0000584   | 0.00000108  |
| 0.0000635   | 0.0000111   | 0.000000142 |
| 0.0000456   | 0.00000525  | 8.54E-08    |
| 0.0000415   | 0.00000863  | 0.000000105 |
| 0.00025195  | 0.0000691   | 0.00000129  |
| 0.00025195  | 0.0000691   | 0.00000129  |
| 0.0000447   | 0.0000115   | 0.000000153 |
| 0.0000681   | 0.00000942  | 0.000000259 |
| 0.000057    | 0.00000765  | 0.000000206 |
| 0.000042    | 0.00000783  | 0.000000179 |
| 0.0000308   | 0.00000701  | 0.000000147 |
| 0.000223666 | 0.0000584   | 0.00000115  |
| 0.0000365   | 0.00000443  | 0.000000118 |
| 0.0000339   | 0.00000659  | 0.000000197 |
| 0.00000674  | 0.00000443  | 5.94E-08    |
| 0.00000674  | 0.00000443  | 5.94E-08    |
| 0.0000466   | 0.0000061   | 0.000000188 |
| 0.0000274   | 0.000000833 | 7.61E-08    |
| 0.0000274   | 0.000000833 | 7.61E-08    |
| 0.0000402   | 0.00000705  | 0.000000181 |
| 0.0000363   | 0.00000879  | 0.00000019  |
| 0.0000373   | 0.00000724  | 0.000000153 |
| 0.0000882   | 0.0000157   | 0.000000585 |
| 0.0000323   | 0.0000055   | 0.000000157 |
| 0.0000323   | 0.00000643  | 0.0000002   |
| 0.0000423   | 0.00000688  | 0.000000146 |
| 0.0000459   | 0.00000847  | 0.000000203 |
| 0.0000326   | 0.00000493  | 0.000000157 |
| 0.0000772   | 0.00001     | 0.000000351 |
| 0.242038    | 0.0662314   | 0.0015175   |
| 0.0000495   | 0.0000063   | 0.000000155 |
| 0.0000502   | 0.0000057   | 0.000000279 |
| 0.000028    | 0.00000698  | 0.000000158 |
| 0.0000471   | 0.00000563  | 0.000000262 |
| 0.0000273   | 0.00000403  | 9.05E-08    |
| 0.0000461   | 0.00000659  | 0.000000241 |
| 0.0000451   | 0.00000658  | 0.000000203 |
| 0.0000511   | 0.00000745  | 0.000000216 |
| 0.00000674  | 0.00000416  | 5.47E-08    |
| 0.00000674  | 0.00000416  | 5.47E-08    |

|            |             |             |
|------------|-------------|-------------|
| 0.000031   | 0.00000713  | 0.000000171 |
| 0.0000292  | 0.00000553  | 0.000000152 |
| 0.0000449  | 0.00000238  | 0.000000143 |
| 0.00005    | 0.0000082   | 0.000000197 |
| 0.0000511  | 0.00000613  | 0.000000285 |
| 0.0000518  | 0.00000602  | 0.000000294 |
| 0.0000285  | 0.00000701  | 0.000000157 |
| 0.0000285  | 0.00000701  | 0.000000157 |
| 0.0000285  | 0.00000701  | 0.000000157 |
| 0.0000491  | 0.00000739  | 0.00000023  |
| 0.0000529  | 0.00000771  | 0.000000242 |
| 0.0000511  | 0.00000627  | 0.000000271 |
| 0.0000585  | 0.0000102   | 0.00000026  |
| 0.0000468  | 0.00000736  | 0.000000207 |
| 0.0000473  | 0.00000687  | 0.000000228 |
| 0.0000513  | 0.00000619  | 0.000000292 |
| 0.0000506  | 0.00000988  | 0.000000146 |
| 0.00000746 | 0.000000599 | 3.24E-08    |
| 0.00000911 | 0.000000754 | 4.02E-08    |
| 0.0000234  | 0.00000596  | 0.000000148 |
| 0.0000105  | 0.000000872 | 4.64E-08    |
| 0.0000506  | 0.00000987  | 0.000000146 |
| 0.00004    | 0.00000653  | 0.000000177 |
| 0.000032   | 0.00000342  | 0.000000154 |
| 0.0000517  | 0.00000657  | 0.000000211 |
| 0.0000517  | 0.00000657  | 0.000000211 |
| 0.0000209  | 0.00000682  | 0.000000153 |
| 0.0000209  | 0.00000682  | 0.000000153 |
| 0.0000209  | 0.00000682  | 0.000000153 |
| 0.0000209  | 0.00000682  | 0.000000153 |
| 0.0000359  | 0.00000751  | 0.0000002   |
| 0.000036   | 0.00000759  | 0.000000199 |
| 0.0000522  | 0.00000883  | 0.000000248 |
| 0.0000728  | 0.0000107   | 0.000000375 |
| 0.0000198  | 0.00000638  | 0.000000183 |
| 0.0000198  | 0.00000638  | 0.000000183 |
| 0.0000334  | 0.00000743  | 0.000000201 |
| 0.00000154 | 0.000018    | 0.000000289 |
| 0.0000755  | 0.0000125   | 0.000000373 |
| 0.000037   | 0.00000534  | 0.000000182 |
| 0.0000511  | 0.00000736  | 0.000000254 |
| 0.0000274  | 0.00000633  | 0.000000136 |
| 0.0000718  | 0.00000941  | 0.000000379 |
| 0.0000254  | 0.00000706  | 0.000000164 |
| 0.0000809  | 0.00000684  | 0.000000215 |
| 0.0000379  | 0.00000566  | 0.000000179 |
| 0.0000779  | 0.00000718  | 0.000000383 |

|             |            |             |
|-------------|------------|-------------|
| 0.0000779   | 0.00000718 | 0.000000383 |
| 0.0000322   | 0.00000664 | 0.000000226 |
| 0.0000739   | 0.00000988 | 0.000000274 |
| 0.0000255   | 0.00000509 | 0.000000115 |
| 0.0000414   | 0.00000715 | 0.000000231 |
| 0.0000393   | 0.00000602 | 0.000000186 |
| 0.000168865 | 0.0000224  | 0.000000839 |
| 0.0000598   | 0.0000103  | 0.000000287 |
| 0.000059    | 0.0000142  | 0.000000372 |
| 0.00000707  | 0.00000515 | 0.000000089 |
| 0.0000466   | 0.00000705 | 0.000000263 |
| 0.0000735   | 0.000012   | 0.000000353 |
| 0.0000423   | 0.0000078  | 0.000000262 |
| 0.0000404   | 0.0000103  | 0.000000203 |
| 0.0000447   | 0.00000683 | 0.00000027  |
| 0.0000511   | 0.00000629 | 0.000000261 |
| 0.0000351   | 0.00000714 | 0.000000254 |
| 0.0000359   | 0.0000101  | 0.000000184 |
| 0.0000359   | 0.0000101  | 0.000000184 |
| 0.0000359   | 0.0000101  | 0.000000184 |
| 0.0000359   | 0.0000101  | 0.000000184 |
| 0.0000391   | 0.0000064  | 0.000000241 |
| 0.0000456   | 0.00000687 | 0.000000247 |
| 0.000058    | 0.00000894 | 0.000000276 |
| 0.0000483   | 0.00000782 | 0.000000208 |
| 0.0000809   | 0.000014   | 0.00000047  |
| 0.0000341   | 0.00000771 | 0.000000198 |
| 0.0000437   | 0.00000499 | 0.000000243 |
| 0.0000506   | 0.00000683 | 0.000000289 |
| 0.0000447   | 0.00000682 | 0.000000138 |
| 0.0000227   | 0.00000592 | 0.000000146 |
| 0.0000372   | 0.0000062  | 0.000000186 |
| 0.0000382   | 0.00000591 | 0.000000145 |
| 0.0000581   | 0.00000836 | 0.000000311 |
| 0.0000243   | 0.00000514 | 0.000000154 |
| 0.0000204   | 0.0000088  | 0.00000016  |
| 0.0000361   | 0.0000137  | 0.000000352 |
| 0.0000345   | 0.0000142  | 0.000000372 |
| 0.0000596   | 0.0000106  | 0.000000324 |
| 0.0000535   | 0.0000104  | 0.000000297 |
| 0.0000623   | 0.0000109  | 0.000000433 |
| 0.0000427   | 0.00000586 | 0.000000176 |
| 0.0000548   | 0.00000942 | 0.000000246 |
| 0.0000834   | 0.0000125  | 0.000000622 |
| 0.00000187  | 0.00000348 | 1.75E-08    |
| 0.0000457   | 0.0000069  | 0.000000199 |
| 0.0000351   | 0.00000478 | 0.00000017  |

|             |            |             |
|-------------|------------|-------------|
| 0.0000388   | 0.00000451 | 0.00000018  |
| 0.0000464   | 0.00000707 | 0.000000204 |
| 0.0000559   | 0.00000673 | 0.000000329 |
| 0.0000134   | 0.00000415 | 0.000000102 |
| 0.0000552   | 0.00000882 | 0.000000273 |
| 0.00000208  | 0.0000034  | 2.84E-08    |
| 0.000041    | 0.00000701 | 0.000000288 |
| 0.0000664   | 0.00000997 | 0.000000372 |
| 0.00000249  | 0.00000388 | 3.36E-08    |
| 0.0000448   | 0.00000462 | 0.000000228 |
| 0.000071    | 0.000012   | 0.000000467 |
| 0.000071    | 0.000012   | 0.000000467 |
| 0.0000409   | 0.00000725 | 0.000000269 |
| 0.0000445   | 0.00000747 | 0.000000308 |
| 0.0000372   | 0.00000604 | 0.000000186 |
| 0.0000218   | 0.00000154 | 0.000000127 |
| 0.0000623   | 0.00000892 | 0.000000331 |
| 0.0000259   | 0.00000545 | 0.000000147 |
| 0.0000424   | 0.00000585 | 0.0000002   |
| 0.0000259   | 0.00000523 | 0.000000147 |
| 0.0000671   | 0.0000105  | 0.000000408 |
| 0.0000599   | 0.0000103  | 0.000000359 |
| 0.0000245   | 0.00000625 | 0.000000165 |
| 0.000100581 | 0.0000186  | 0.000000597 |
| 0.0000398   | 0.00000532 | 0.000000174 |
| 0.0000457   | 0.00000683 | 0.000000283 |
| 0.0000108   | 0.0000047  | 0.000000209 |
| 0.0000351   | 0.00000551 | 0.00000021  |
| 0.00000492  | 0.00000409 | 0.00000011  |
| 0.00000492  | 0.00000409 | 0.00000011  |
| 0.0000534   | 0.00000968 | 0.000000035 |
| 0.0000534   | 0.00000968 | 0.000000035 |
| 0.00000474  | 0.00000557 | 6.16E-08    |
| 0.00000813  | 0.00000632 | 0.000000112 |
| 0.00000813  | 0.00000632 | 0.000000112 |
| 0.0000549   | 0.0000136  | 0.000000178 |
| 0.0000912   | 0.0000312  | 0.000000305 |
| 0.0000671   | 0.0000113  | 0.000000045 |
| 0.0000142   | 0.00000627 | 0.000000161 |
| 0.0000221   | 0.00000581 | 0.000000158 |
| 0.00781364  | 0.00587106 | 0.000680286 |
| 0.0000469   | 0.00000724 | 0.000000194 |
| 0.00000834  | 0.00000661 | 0.000000162 |
| 0.0000865   | 0.000013   | 0.000000573 |
| 0.0000128   | 0.00000417 | 9.34E-08    |
| 0.161764    | 0.0295579  | 0.00111286  |
| 0.000116347 | 0.000025   | 0.000000274 |

|             |             |             |
|-------------|-------------|-------------|
| 0.0000502   | 0.0000102   | 0.000000402 |
| 0.0000502   | 0.0000102   | 0.000000402 |
| 0.0000433   | 0.00000839  | 0.000000311 |
| 0.0000475   | 0.00000595  | 0.000000228 |
| 0.0000484   | 0.00000823  | 0.000000388 |
| 0.0000948   | 0.0000419   | 0.000000364 |
| 0.0000589   | 0.00000859  | 0.000000415 |
| 0.0000455   | 0.00000423  | 0.000000261 |
| 0.0000446   | 0.00000758  | 0.000000377 |
| 0.000085    | 0.0000344   | 0.000000323 |
| 0.0000936   | 0.0000381   | 0.000000377 |
| 0.0000699   | 0.000029    | 0.000000269 |
| 0.0000763   | 0.0000255   | 0.000000586 |
| 0.0000472   | 0.00000736  | 0.000000379 |
| 0.0000599   | 0.0000215   | 0.000000414 |
| 0.0000331   | 0.0000066   | 0.000000274 |
| 0.0000983   | 0.0000441   | 0.000000038 |
| 0.0000149   | 0.00000222  | 0.000000102 |
| 0.000066    | 0.0000306   | 0.000000291 |
| 0.000113938 | 0.0000239   | 0.000000306 |
| 0.0000772   | 0.000032    | 0.000000298 |
| 0.0000308   | 0.00000588  | 0.000000218 |
| 0.000117495 | 0.0000667   | 0.000000556 |
| 0.0000227   | 0.00000604  | 0.000000126 |
| 0.0000461   | 0.00000527  | 0.000000373 |
| 0.0656986   | 0.0310652   | 0.000315326 |
| 0.0000863   | 0.0000419   | 0.000000496 |
| 0.0000375   | 0.0000118   | 5.42E-08    |
| 0.0000322   | 0.00000298  | 0.000000231 |
| 0.0000387   | 0.0000125   | 0.000000101 |
| 0.0000473   | 0.0000143   | 0.000000103 |
| 0.000120467 | 0.0000651   | 0.000000594 |
| 0.000120467 | 0.0000651   | 0.000000594 |
| 0.0000184   | 0.00000196  | 0.000000198 |
| 0.000101847 | 0.0000301   | 0.000000642 |
| 0.000047    | 0.0000148   | 0.000000195 |
| 0.000102024 | 0.000054    | 0.000000478 |
| 0.0000394   | 0.0000115   | 0.000000122 |
| 0.000498387 | 0.000166471 | 0.000000491 |
| 0.0000948   | 0.0000346   | 0.000000361 |
| 0.00000338  | 0.00000461  | 5.24E-08    |
| 0.0000865   | 0.0000273   | 0.000000333 |
| 0.0000989   | 0.0000651   | 0.000000676 |
| 0.0000989   | 0.0000651   | 0.000000676 |
| 0.0000471   | 0.0000118   | 0.000000393 |
| 0.0000281   | 0.00000583  | 0.000000246 |
| 0.0000281   | 0.00000583  | 0.000000246 |



|             |            |             |
|-------------|------------|-------------|
| 0.0000976   | 0.0000547  | 0.000000521 |
| 0           | 0.00000156 | 3.92E-08    |
| 0.0000976   | 0.0000506  | 0.000000497 |
| 0.0000883   | 0.0000206  | 0.000000739 |
| 0.0000971   | 0.0000509  | 0.000000504 |
| 0.0000132   | 0.00000446 | 0.000000156 |
| 0.0000913   | 0.0000441  | 0.000000441 |
| 0.0000963   | 0.0000472  | 0.000000486 |
| 0.0000471   | 0.0000148  | 0.000000224 |
| 0.0000998   | 0.0000418  | 0.000000508 |
| 0.0000867   | 0.0000194  | 0.000000745 |
| 0.0000926   | 0.0000578  | 0.000000607 |
| 0.0000458   | 0.0000145  | 0.000000185 |
| 0.000095    | 0.0000604  | 0.000000649 |
| 0.0000852   | 0.0000687  | 0.000000176 |
| 0.0000401   | 0.0000122  | 9.12E-08    |
| 0.0000931   | 0.0000578  | 0.000000618 |
| 0.000110441 | 0.0000307  | 0.00000146  |
| 0.0000407   | 0.0000131  | 0.000000135 |
| 0.0000661   | 0.0000504  | 0.00000016  |
| 0.0000661   | 0.0000504  | 0.00000016  |
| 0.000658681 | 0.00221018 | 0.000374413 |
| 0.000111082 | 0.0000612  | 0.000000609 |
| 0.0000104   | 0.0000038  | 4.67E-08    |
| 0.0000375   | 0.000011   | 0.0000001   |
| 0.000053    | 0.0000349  | 0.000000392 |
| 0.000126945 | 0.0000234  | 0.00000141  |
| 0.000125479 | 0.0000367  | 0.000000477 |
| 0           | 0          | 0.0000547   |
| 0.0000909   | 0.0000288  | 0.00000105  |
| 0.0000393   | 0.00000777 | 0.000000596 |
| 0.000051    | 0.0000149  | 0.000000174 |
| 0.0000776   | 0.0000233  | 0.00000132  |
| 0.000130996 | 0.0000276  | 0.000000931 |
| 0.000117683 | 0.0000337  | 0.000000951 |
| 0.000117683 | 0.0000337  | 0.000000951 |
| 0.0000927   | 0.0000206  | 0.000000872 |
| 0.0000108   | 0.0000037  | 4.77E-08    |
| 0.0000826   | 0.0000254  | 0.000000849 |
| 0.030555    | 0.00908273 | 0.000124272 |
| 0.00000996  | 0.00000712 | 0.000000272 |
| 0.0000363   | 0.0000105  | 0.000000466 |
| 0.0000174   | 0.00000596 | 0.000000216 |
| 0.0000422   | 0.0000132  | 0.000000166 |
| 0.000049    | 0.00000849 | 0.000000773 |
| 0.000078    | 0.0000142  | 0.000000628 |
| 0.0000395   | 0.00000518 | 0.000000599 |

|             |             |             |
|-------------|-------------|-------------|
| 0.000133625 | 0.0000491   | 0.00000142  |
| 0.000133625 | 0.0000491   | 0.00000142  |
| 0.000133625 | 0.0000491   | 0.00000142  |
| 0.00000943  | 0.00000674  | 0.000000274 |
| 0.00000943  | 0.00000674  | 0.000000274 |
| 0.00031559  | 0.000123065 | 0.00000561  |
| 0.0000454   | 0.0000136   | 0.000000225 |
| 0.0000455   | 0.0000138   | 0.000000231 |
| 0.000000347 | 0.00000058  | 0.000000353 |
| 0.00000584  | 0.00000247  | 2.55E-08    |
| 0.0000429   | 0.0000134   | 0.000000196 |
| 0.0000429   | 0.0000134   | 0.000000196 |
| 0.000139077 | 0.0000845   | 0.0000059   |
| 0.000000583 | 0.000000874 | 0.000000736 |
| 0.000000196 | 0.000000726 | 0.000000517 |
| 0.000117683 | 0.0000415   | 0.00000191  |
| 0.0000183   | 0.0000074   | 0.000000298 |
| 0.0000888   | 0.0000337   | 0.00000276  |
| 0.000000178 | 0.000000587 | 0.000000473 |
| 0.000120115 | 0.0000532   | 0.00000197  |
| 0.000036    | 0.0000137   | 0.00000062  |
| 0.000036    | 0.0000137   | 0.00000062  |
| 0.000036    | 0.0000137   | 0.00000062  |
| 0.000036    | 0.0000137   | 0.00000062  |
| 0.0000496   | 0.0000158   | 0.000000262 |
| 0.000046    | 0.0000134   | 0.000000263 |
| 0.000000474 | 0.000000835 | 0.000000672 |
| 0.0000439   | 0.0000136   | 0.000000196 |
| 0.000000362 | 0.000000682 | 0.000000395 |
| 0.00000656  | 0.000000779 | 0.000000138 |
| 0.000000423 | 0.000000728 | 0.000000642 |
| 0.000000573 | 0.000000813 | 0.000000277 |
| 0.00006     | 0.0000214   | 0.00000106  |
| 0.0000924   | 0.0000267   | 0.00000188  |
| 0.000133625 | 0.0000601   | 0.00000284  |
| 0.000000416 | 0.000000696 | 0.000000612 |
| 0.000000511 | 0.000000826 | 0.000000692 |
| 0.000000452 | 0.000000888 | 0.000000513 |
| 0.000000418 | 0.000000885 | 0.000000505 |
| 0.000000179 | 0.000000481 | 0.000000243 |
| 0.000000365 | 0.000000513 | 0.000000527 |
| 0.0000788   | 0.0000791   | 0.00000204  |
| 0.000000457 | 0.00000071  | 0.000000694 |
| 0.000000215 | 0.000000609 | 0.000000456 |
| 0.114176    | 0.0156625   | 0.000364703 |
| 0.000000594 | 0.00000111  | 0.000000771 |
| 0.00000023  | 0.000000668 | 0.000000437 |

|             |             |             |
|-------------|-------------|-------------|
| 0.000000193 | 0.000000517 | 0.00000049  |
| 0.000174638 | 0.00000144  | 0.000000983 |
| 0.0000872   | 0.0000266   | 0.00000237  |
| 0.000000246 | 0.000000555 | 0.000000573 |
| 0.000000325 | 0.000000728 | 0.000000497 |
| 0.000000203 | 0.000000443 | 0.000000533 |
| 0.000000631 | 0.00000104  | 0.000000725 |
| 0.000000236 | 0.000000504 | 0.00000052  |
| 0.000131655 | 0.000164148 | 0.00000546  |
| 0.000131655 | 0.000164148 | 0.00000546  |
| 0.000000346 | 0.000000749 | 0.000000523 |
| 0.000000443 | 0.000000719 | 0.000000735 |
| 0.000000505 | 0.00000074  | 0.000000821 |
| 0.000000248 | 0.000000731 | 0.000000522 |
| 0.000000114 | 0.000157254 | 0.000000104 |
| 0.000000269 | 0.000000789 | 0.000000559 |
| 0.000000617 | 0.000000833 | 0.000000951 |
| 0           | 0           | 0.000000107 |
| 0.000000257 | 0.000000692 | 0.000000529 |
| 0.000000504 | 0.00000079  | 0.000000758 |
| 0.000000373 | 0.000000702 | 0.000000677 |
| 0.000000348 | 0.00000069  | 0.000000703 |
| 0.000000231 | 0.000000746 | 0.00000051  |
| 0.000000242 | 0.000000593 | 0.000000516 |
| 0.000000445 | 0.000000619 | 0.000000672 |
| 0.000000243 | 0.000000597 | 0.000000535 |
| 0.000000385 | 0.000000797 | 0.000000738 |
| 0.000000494 | 0.000000688 | 0.000000766 |
| 0.000000175 | 0.000000588 | 0.000000474 |
| 0.0000515   | 0.00000873  | 9.48E-08    |
| 0.000000429 | 0.000000691 | 0.000000758 |
| 0.000000365 | 0.000000492 | 0.000000806 |
| 0.000000365 | 0.000000492 | 0.000000806 |
| 0.000000422 | 0.000000787 | 0.000000867 |
| 0.000115087 | 0.0000513   | 0.00000464  |
| 5.06E-08    | 0.000000366 | 0.000000382 |
| 5.06E-08    | 0.000000366 | 0.000000382 |
| 0.000000241 | 0.000000498 | 0.000000541 |
| 0.000000241 | 0.000000498 | 0.000000541 |
| 0.000149166 | 0.0000178   | 0.000000258 |
| 0.000000389 | 0.000000875 | 0.000000914 |
| 0.000000389 | 0.000000875 | 0.000000914 |
| 0.000000292 | 0.000000589 | 0.000000822 |
| 0.000123443 | 0.00000874  | 0.000000202 |
| 0.000000243 | 0.000000434 | 0.000000631 |
| 0           | 0           | 0.000000276 |
| 0.000000249 | 0.000225518 | 0.000000258 |

|             |             |             |
|-------------|-------------|-------------|
| 0.000000182 | 0.000204207 | 0.000000236 |
| 0.000000192 | 0.000157254 | 0.000000189 |
| 0.00000175  | 0.00000387  | 0.000000831 |
| 0.00000309  | 9.15E-08    | 0.000000394 |
| 0.000000103 | 0.000136791 | 0.000000174 |
| 0           | 0           | 0.000000145 |
| 0.000186338 | 0.000137126 | 0.00000038  |
| 0.000000137 | 0.000218464 | 0.000000296 |
| 0.000120959 | 0.000000406 | 0.000000358 |
| 0.000154634 | 0.0000311   | 0.00000403  |
| 0.000000483 | 0.000275932 | 0.000000967 |
| 0.0000685   | 0.00000101  | 0.000000819 |
| 0.000000902 | 0.000334466 | 0.00000119  |
| 0.0000178   | 0.0000014   | 0           |
| 0.0000343   | 0.213593    | 0.000303919 |
| 0.000000772 | 0.000300735 | 0.00000107  |
| 0.0000205   | 0.00000707  | 0           |
| 0.0000192   | 0.00000158  | 0           |
| 0.0000835   | 0.0000472   | 0.0000043   |
| 0.000000226 | 0.000207674 | 0.000000307 |
| 0.000000568 | 0.000278739 | 0.00000104  |
| 0.000000563 | 0.000274318 | 0.00000107  |
| 0.000000194 | 0.000247905 | 0.000000384 |
| 0           | 0.0000382   | 9.68E-08    |
| 0.000000544 | 0.000319695 | 0.00000125  |
| 0.000000644 | 0.000333509 | 0.00000132  |
| 0.000022    | 0.00000521  | 0           |
| 0.000000876 | 0.000433813 | 0.00000169  |
| 0.000000222 | 0.000213362 | 0.00000034  |
| 0.000000222 | 0.000213362 | 0.00000034  |
| 0.000000522 | 0.000266566 | 0.00000108  |
| 0.00014216  | 0.00000882  | 0.00000302  |
| 0.000000181 | 0.000245059 | 0.000000401 |
| 0.000000145 | 0.000217525 | 0.00000036  |
| 0.0000287   | 0           | 5.14E-08    |
| 0.000000216 | 0.000230261 | 0.000000384 |
| 0.000212572 | 0.0000369   | 0.00001     |
| 0.000196531 | 0.000162029 | 0.00000534  |
| 0.0000567   | 0.0000186   | 0.000000284 |
| 0.0000391   | 0.000131101 | 0.00000781  |
| 0.0000231   | 0.00000257  | 0           |
| 0.00448303  | 0.21046     | 0.000999054 |
| 0.0000145   | 0.00000142  | 0           |
| 0           | 0           | 0           |
| 0.0000344   | 0.00000884  | 0           |
| 0.0000828   | 0.0000406   | 0.00000606  |
| 0.0000195   | 0           | 4.54E-08    |

|             |             |             |
|-------------|-------------|-------------|
| 0.00000694  | 0.000000569 | 0           |
| 0.0000779   | 0.0000135   | 0.000000891 |
| 0.000123458 | 0.0000238   | 0.00000405  |
| 0.0000542   | 0.0000824   | 0.0000029   |
| 0.0000324   | 0.0000076   | 0           |
| 0.0000973   | 0.00000126  | 0.00000023  |
| 0.000172091 | 0.000268283 | 0.0000148   |
| 0.000172091 | 0.000268283 | 0.0000148   |
| 0.000172091 | 0.000268283 | 0.0000148   |
| 0.0178488   | 0           | 0.0000454   |
| 0.000165906 | 0.000021    | 0.000000478 |
| 0.00010349  | 0.0000145   | 0.00000319  |
| 0.0000721   | 0.0000145   | 0.00000282  |
| 0.00000123  | 3.57E-08    | 0.000000226 |
| 0.0000473   | 0.0000075   | 0.000000154 |
| 0.00000303  | 0.0000173   | 5.36E-08    |
| 0.0001356   | 0.0000214   | 0.0000047   |
| 0.0000866   | 0.000202728 | 0.0000101   |
| 0.00000106  | 3.06E-08    | 0.000000221 |
| 0.000102277 | 0.0000155   | 0.00000342  |
| 0.000205948 | 0.0000266   | 0.00000075  |
| 0.000146399 | 0.0000243   | 0.00000534  |
| 0.000099    | 0.00000011  | 0.000000101 |
| 0.0000194   | 0           | 6.41E-08    |
| 0.0000204   | 0           | 6.73E-08    |
| 0.0000515   | 0.00000873  | 9.48E-08    |
| 0.0000195   | 0           | 6.79E-08    |
| 0.00000266  | 0.0000164   | 6.45E-08    |
| 0.0000243   | 0.00000597  | 0           |
| 0.00000272  | 0.0000182   | 7.15E-08    |
| 0           | 0.000045    | 0.000000248 |
| 0.0927408   | 0.00101531  | 0.000554266 |
| 0.00000453  | 0.00000552  | 0.000000445 |
| 0.00000275  | 0.0000156   | 6.74E-08    |
| 0.00000275  | 0.0000156   | 6.74E-08    |
| 0           | 0.0000395   | 3.46E-08    |
| 0.00000287  | 0.0000182   | 7.88E-08    |
| 0.0000196   | 0           | 7.65E-08    |
| 0.000235581 | 0.0000451   | 0.0000116   |
| 0.00000319  | 0.0000172   | 7.77E-08    |
| 0.00000367  | 0.0000171   | 8.13E-08    |
| 0.00000286  | 0.0000173   | 7.95E-08    |
| 0           | 0.0000432   | 0.000000264 |
| 0.000161084 | 0.0000204   | 0.000000465 |
| 0.000112966 | 0.000000248 | 0.000000218 |
| 0.000112966 | 0.000000248 | 0.000000218 |
| 0.00000285  | 0.0000158   | 7.57E-08    |

|             |             |             |
|-------------|-------------|-------------|
| 0.000148796 | 0.0000228   | 0.00000558  |
| 0.00000286  | 0.0000164   | 7.91E-08    |
| 0.000198895 | 0.000000402 | 0.000000442 |
| 0.000164133 | 0.0000208   | 0.000000531 |
| 0.000126728 | 0.000000334 | 0.000000259 |
| 0.000167362 | 0.0000213   | 0.000000556 |
| 0.0000037   | 0.0000187   | 9.61E-08    |
| 0.0000841   | 0.0000919   | 0.000011    |
| 0.000210719 | 0.000000442 | 0.000000661 |
| 0.00000286  | 0.0000163   | 0.000000086 |
| 0.0000188   | 0.00000637  | 0.000000136 |
| 0.00000298  | 0.0000166   | 9.37E-08    |
| 0.0000395   | 0.00000356  | 0.000000274 |
| 0.0000952   | 8.61E-08    | 0.000000125 |
| 0.00000241  | 0.0000181   | 0.0000001   |
| 0.0000216   | 0.00000913  | 0.000000123 |
| 0.000123749 | 0.000109653 | 0.0000101   |
| 0.000123718 | 0.00010962  | 0.0000101   |
| 0.0000991   | 0.0000143   | 0.000000478 |
| 0.00000352  | 0.000019    | 0.00000011  |
| 0.00000352  | 0.000019    | 0.00000011  |
| 0.000153821 | 0.000000387 | 0.000000301 |
| 0.00000352  | 0.0000179   | 0.000000108 |
| 0.00191939  | 0.0107318   | 0.000064    |
| 0.00000293  | 0.0000166   | 0.000000101 |
| 0.0000835   | 0.000024    | 0.000000212 |
| 0.00000617  | 0.00000635  | 0.000000624 |
| 0.00000291  | 0.0000194   | 0.000000121 |
| 0.000126175 | 0.000000131 | 0.000000291 |
| 0.000118752 | 0.000000116 | 0.000000026 |
| 0.000107422 | 0.000000157 | 0.000000298 |
| 0.000158567 | 0.0000278   | 0.0000063   |
| 0.0000196   | 0           | 0.000000115 |
| 0.000112401 | 0.000000162 | 0.000000239 |
| 0.00015809  | 0.000000161 | 0.000000339 |
| 0.0000998   | 0.000000127 | 0.000000214 |
| 0.00000289  | 0.0000194   | 0.000000128 |
| 0.0000982   | 0.000000149 | 0.000000219 |
| 0.0000026   | 0.00000532  | 4.27E-08    |
| 0.00000321  | 0.0000196   | 0.000000134 |
| 0.000143237 | 0.000100633 | 0.0000154   |
| 0.000116382 | 0.000000119 | 0.000000246 |
| 0           | 0.0000507   | 0.000000177 |
| 0.000113693 | 0.000000123 | 0.000000264 |
| 0.00000286  | 0.0000168   | 0.000000127 |
| 0           | 0.0000497   | 0.000000181 |
| 0.000139112 | 0.000000295 | 0.000000263 |

|             |             |             |
|-------------|-------------|-------------|
| 0.0000029   | 0.0000162   | 0.000000126 |
| 0.000160237 | 0.000000382 | 0.000000426 |
| 0.000160237 | 0.000000382 | 0.000000426 |
| 0.0000987   | 0.0000178   | 0.000006    |
| 0           | 0.0000423   | 0.000000148 |
| 0.000000699 | 0.00000126  | 0.00000029  |
| 0.00000345  | 0.0000179   | 0.000000166 |
| 0.0000668   | 0.0000145   | 0.00000769  |
| 0.0000043   | 0.0000249   | 0.00000023  |
| 0           | 0.0000396   | 0.000000107 |
| 0.00000279  | 0.00000705  | 0.00000165  |
| 0.0000031   | 0.00000537  | 0.000000128 |
| 0.000140433 | 0.000000296 | 0.000000355 |
| 0.000156855 | 0.000281405 | 0.0000171   |
| 0.00000238  | 0.0000162   | 0.000000159 |
| 0.000187423 | 0.000395108 | 0.0000166   |
| 0.0000943   | 0.0000284   | 0.00000383  |
| 0.000007    | 0.00000436  | 0.000000239 |
| 0.000136482 | 0.000000307 | 0.00000036  |
| 0.0000126   | 0.0000047   | 0.000000178 |
| 0.0000655   | 0.00000208  | 0.000000208 |
| 0.000101703 | 0.000000146 | 0.000000365 |
| 0.0000628   | 0.0000125   | 0.00000867  |
| 0.000134592 | 0.000290974 | 0.0000481   |
| 0.000146178 | 0.000333535 | 0.0000163   |
| 0.000297243 | 0.000298122 | 0.0000421   |
| 0.00000567  | 0.00000494  | 0           |
| 0.000122448 | 0.00012597  | 0.0000166   |
| 0.000726175 | 0.000970219 | 0.000143665 |
| 0.0000495   | 0           | 0.00000489  |
| 0.000011    | 0.00000665  | 0.000000139 |
| 0           | 0.0000488   | 0.000000246 |
| 0           | 0.0000488   | 0.000000246 |
| 0.0000018   | 0.00000438  | 4.54E-08    |
| 0.0000588   | 0.0000103   | 0.00000324  |
| 0.00000293  | 0           | 0           |
| 0           | 0.0000508   | 0.000000192 |
| 0           | 0.000043    | 0.000000167 |
| 0           | 0.0000422   | 0.000000164 |
| 0           | 0.0000394   | 0.000000208 |
| 0.00000689  | 0.00000622  | 0.000000118 |
| 0.000109108 | 0.0000461   | 0.0000239   |
| 0.00000155  | 0.00000226  | 0.000000359 |
| 0.0000102   | 0.00000646  | 0.000000176 |
| 0.000392195 | 0.000420252 | 0.0000723   |
| 0           | 0.0000427   | 0.000000175 |
| 0.0000109   | 0.00000402  | 0.000000362 |

|             |             |             |
|-------------|-------------|-------------|
| 0.0000375   | 0.0000119   | 0           |
| 0           | 0           | 0.000000099 |
| 0.000119942 | 0.000134914 | 0.0000178   |
| 0           | 0.0445989   | 0.000183471 |
| 0.000144228 | 0.000294807 | 0.0000204   |
| 0.00000502  | 0.00000612  | 0.000000139 |
| 0.00000271  | 0.000000117 | 0.000000192 |
| 0           | 0.0000398   | 0.000000119 |
| 0.00000482  | 0.00000607  | 0.000000118 |
| 0           | 0.0000392   | 0.000000173 |
| 0           | 0.0000392   | 0.000000173 |
| 0.0000035   | 0.00000663  | 0.000000161 |
| 0.0000035   | 0.00000663  | 0.000000161 |
| 0.00016764  | 0.0000948   | 0.0000369   |
| 0           | 0.0000442   | 0.000000223 |
| 0.0000111   | 0.0000077   | 0.000000179 |
| 0           | 0.0000454   | 0.000000239 |
| 0.00000617  | 0.00000633  | 0.000000158 |
| 0.00000139  | 0.00000252  | 0.000000195 |
| 0.00000195  | 0.00000129  | 0.000000106 |
| 0.000156274 | 0.0000264   | 0.00000619  |
| 0.00000823  | 0.00000595  | 0.000000133 |
| 0.00000115  | 0           | 0.000000863 |
| 0.00010294  | 0.000064    | 0.0000145   |
| 0.0000981   | 0.0000356   | 0.0000142   |
| 0.0000467   | 0.0000137   | 0           |
| 0.0000456   | 0.000145541 | 0.0000516   |
| 0.000000918 | 0.000000744 | 0.000000294 |
| 0.000000243 | 0.00000654  | 0.000000834 |
| 6.15E-08    | 0           | 0           |
| 0           | 0           | 4.49E-08    |
| 0           | 0           | 4.49E-08    |
| 0.00000728  | 0.00000717  | 0.000000168 |
| 0.0000649   | 0.0000167   | 0.00000693  |
| 0.000211388 | 0.000313441 | 0.000092    |
| 0           | 0.0000428   | 0.000000226 |
| 0.000279427 | 0.000163227 | 0.0000829   |
| 0.00000573  | 0.00000213  | 0.000000408 |
| 0.000274739 | 0.000358901 | 0.000116203 |
| 0.000216513 | 0.000311637 | 0.0000436   |
| 0.00000452  | 0.00000602  | 0.000000162 |
| 0.000298475 | 0.000410685 | 0.000130842 |
| 0.000000808 | 0.000000153 | 0           |
| 0.000353399 | 0.000457256 | 0.000149811 |
| 0.000315344 | 0.000218085 | 0.0000918   |
| 0.000317431 | 0.000410947 | 0.000148545 |
| 0.000244694 | 0.000281545 | 0.000136618 |



|             |             |             |
|-------------|-------------|-------------|
| 0.000244694 | 0.000281545 | 0.000136618 |
| 0.000000441 | 0.00000418  | 0.000000323 |
| 0.00000044  | 0.00000418  | 0.000000323 |
| 0.000152147 | 0.000106162 | 0.0000244   |
| 0.0000014   | 5.89E-08    | 0.00000016  |
| 0.000000146 | 0           | 0           |
| 0.000336058 | 0.000696829 | 0.00019923  |
| 0.000102835 | 0.0000399   | 0.0000204   |
| 0           | 0.0000432   | 0.000000178 |
| 0.0000333   | 0.0000415   | 0.0000202   |
| 0.0000723   | 0.0000193   | 0.0000094   |
| 0.00000213  | 0.0000186   | 0.00000125  |
| 0.000478875 | 0.000404664 | 0.000130873 |
| 0.000142251 | 0.0000755   | 0.0000134   |
| 0.0000164   | 0.00000476  | 0.000000899 |
| 0.000000701 | 0.00000202  | 0           |
| 0.0000354   | 0.0000131   | 0.00000838  |
| 0.000226026 | 0.0000239   | 0.0000502   |
| 0.000311376 | 0.000452514 | 0.000173384 |
| 0.000000701 | 0.00000202  | 0           |
| 0.000000701 | 0.00000202  | 0           |
| 0.000398256 | 0.000155443 | 0.000167173 |
| 0.000397606 | 0.000509188 | 0.000261761 |
| 0.000100825 | 0.00033762  | 0.0000929   |
| 0.000100427 | 0.0000737   | 0.0000565   |
| 0.000000576 | 0.00000776  | 0           |
| 0.000314737 | 0.000454681 | 0.000116832 |
| 0.000000356 | 0.0000282   | 0.00000795  |
| 0.000413995 | 0.000471122 | 0.000203574 |
| 0.000238901 | 0.000245184 | 0.000126723 |
| 0.00000318  | 0.0000141   | 0.00000178  |
| 0.000478803 | 0.000610048 | 0.000310897 |
| 0.00000193  | 0.00000148  | 0.0000009   |
| 0           | 0           | 1.83E-08    |
| 0.00000311  | 0.000000832 | 0.000000962 |
| 0           | 0.00000022  | 0.000000225 |
| 0           | 0.00000577  | 0.000000539 |
| 0           | 0.000000236 | 0.000000241 |
| 0.00000032  | 0.000000416 | 0           |
| 0.00000032  | 0.000000416 | 0           |
| 0           | 0.000000283 | 0.000000286 |
| 0.000407557 | 0.000381321 | 0.00022324  |
| 0           | 0           | 1.81E-08    |
| 0           | 0           | 0           |
| 0           | 0.0000412   | 0.000000358 |
| 0           | 0           | 0.0000234   |
| 0           | 0.00000033  | 0.000000332 |

|             |             |             |
|-------------|-------------|-------------|
| 0.000345614 | 0.00047603  | 0.000165978 |
| 0.0000716   | 0.0000247   | 0.0000447   |
| 0.000500598 | 0.000909389 | 0.000284777 |
| 0           | 0.000000376 | 0.000000377 |
| 0           | 0           | 0           |
| 0           | 0           | 0.000000021 |
| 0           | 0           | 0           |
| 0.000000505 | 0.000000153 | 0           |
| 0           | 0           | 0           |
| 0.000179746 | 0.000599086 | 0.000184619 |
| 0.0000927   | 0.000342021 | 0.000103609 |
| 0           | 0           | 5.12E-08    |
| 0           | 0.000000283 | 0.000000292 |
| 0.0000065   | 0           | 0.000000564 |
| 0.0000775   | 0.0000269   | 0.0000256   |
| 0.000280516 | 0.000467474 | 0.00013995  |
| 0.000342718 | 0.000478937 | 0.000186101 |
| 0           | 0           | 7.46E-08    |
| 0.0000608   | 0.000011    | 0.0000153   |
| 0.000366521 | 0.000534997 | 0.000198692 |
| 0.000000358 | 0.000000399 | 9.42E-08    |
| 0.000000193 | 0           | 1.79E-08    |
| 0.000106614 | 0.0000396   | 0.0000363   |
| 0           | 0           | 0           |
| 0.000478875 | 0.000404664 | 0.000229938 |
| 0.000446947 | 0.0003062   | 0.000205986 |
| 0.000151117 | 0.000268773 | 0.000114648 |
| 0.000000184 | 0.0000107   | 0.00000109  |
| 0.000195549 | 0.000236347 | 0.000202449 |
| 0           | 0           | 0           |
| 0.000000845 | 0           | 0           |
| 0.000000071 | 0.00000757  | 0.000000694 |
| 0           | 0           | 0           |
| 0           | 0           | 0           |
| 0           | 0           | 0.000000437 |
| 0.00000015  | 0           | 0           |
| 0.0000721   | 0.0000591   | 0.0000493   |
| 0           | 0.0000141   | 0.00000672  |
| 0           | 0.00000053  | 0           |
| 0           | 0           | 0           |
| 0.000179941 | 0.000352283 | 0.0000618   |
| 0           | 0           | 0           |
| 0.000698247 | 0.00114401  | 0.000545969 |
| 0.0000671   | 0.0000141   | 0.000014    |
| 0           | 0           | 0           |
| 0.00000515  | 0.0000204   | 0.0000133   |
| 0.00000515  | 0.0000204   | 0.0000133   |

|             |             |             |
|-------------|-------------|-------------|
| 0           | 0.014186    | 0.00711322  |
| 0           | 0.0000134   | 0.00000672  |
| 0.0000031   | 0.000000657 | 0.000000688 |
| 0.000367702 | 0.000665422 | 0.000265528 |
| 0.000000566 | 0.000000376 | 0.000000458 |
| 0.000196049 | 0.000243674 | 0.000269095 |
| 0.0000188   | 0.00000539  | 0.00000358  |
| 0.000107118 | 0.0000623   | 0.0000407   |
| 0.0000848   | 0.0000343   | 0.0000481   |
| 0.0000626   | 0.0000512   | 0.0000274   |
| 0.000335087 | 0.000304923 | 0.000131859 |
| 0.000123417 | 0.0000648   | 0.0000757   |
| 0.000000186 | 0           | 3.18E-08    |
| 0           | 9.06E-08    | 0.000000146 |
| 0.0000273   | 0.0000776   | 0.000068    |
| 0           | 0.000000328 | 5.78E-08    |
| 0           | 0.0000148   | 0.00000791  |
| 0           | 0.0000148   | 0.00000791  |
| 0.000037    | 0.00000545  | 0.0000243   |
| 0           | 0.000000158 | 0           |
| 0.000216609 | 0.000259259 | 0.0000954   |
| 0           | 0           | 0.000000345 |
| 0.000000152 | 0           | 2.89E-08    |
| 0.000000388 | 0           | 0           |
| 0.000391419 | 0.00045162  | 0.000342587 |
| 0.000000376 | 0           | 0           |
| 0.0000016   | 0.0000027   | 0.00000087  |
| 0.000382858 | 0.000678814 | 0.000409127 |
| 0           | 0           | 0           |
| 0.000875405 | 0.00133848  | 0.00084449  |
| 0.0000104   | 0.00000479  | 0.000003    |
| 0.77497     | 0.716192    | 0.522069    |
| 0.000000345 | 0           | 6.96E-08    |
| 0           | 0           | 0           |
| 0.000000715 | 0.00000625  | 0.00000179  |
| 0.00043261  | 0.000959846 | 0.000534659 |
| 0.000154688 | 0.000269592 | 0.000131662 |
| 0           | 0.000000395 | 8.25E-08    |
| 0.0000221   | 0.0000113   | 0.00000875  |
| 0.000000106 | 0           | 0           |
| 0.000000119 | 0.00000103  | 0.000000243 |
| 0.000000119 | 0.00000103  | 0.000000243 |
| 0.0000977   | 0.0000451   | 0.0000668   |
| 0.00000191  | 0.00000418  | 0.00000131  |
| 0.000000539 | 0           | 0           |
| 0.000000476 | 0.0000257   | 0.0000107   |
| 0.000114941 | 0.0000165   | 0.0000231   |

|             |             |             |
|-------------|-------------|-------------|
| 0           | 0           | 0           |
| 0.000582017 | 0.000821662 | 0.000522733 |
| 0           | 0.0000107   | 0.00000724  |
| 0.000000157 | 0           | 3.51E-08    |
| 0.00000013  | 0           | 2.92E-08    |
| 0.000000175 | 0           | 3.97E-08    |
| 0           | 0           | 0           |
| 0           | 0           | 0           |
| 0           | 0           | 0           |
| 0           | 0.0000119   | 0.00000653  |
| 0.000107752 | 0.0000527   | 0.0000758   |
| 0.000000197 | 0           | 4.75E-08    |
| 0.00000234  | 0.0000323   | 0.00000971  |
| 0.00000112  | 0.0000228   | 0.00000799  |
| 0.000401007 | 0.000155518 | 0.000191507 |
| 0.00000394  | 0.00000572  | 0.00000427  |
| 0.000635168 | 0.000786584 | 0.000627122 |
| 0.000000137 | 0           | 3.45E-08    |
| 0.00000307  | 0.0000379   | 0.0000119   |
| 0           | 0           | 0           |
| 0           | 0           | 0           |
| 0.000000365 | 0.000000127 | 0           |
| 0.000000365 | 0.000000127 | 0           |
| 0.000000365 | 0.000000127 | 0           |
| 0.000375566 | 0.000703478 | 0.00046755  |
| 0.000570601 | 0.000900181 | 0.000592459 |
| 0.000000145 | 0           | 3.95E-08    |
| 0           | 0           | 0           |
| 0.00000475  | 0           | 0.0000065   |
| 0           | 0           | 0           |
| 0           | 0.0000128   | 0.00000747  |
| 0           | 0           | 0           |
| 0           | 0.0000106   | 0.00000581  |
| 0.000337919 | 0.000404016 | 0.000341301 |
| 0           | 0.0000101   | 0.00000626  |
| 0.000000126 | 0           | 3.55E-08    |
| 0           | 0.0000108   | 0.00000659  |
| 0           | 0.0000115   | 0.00000708  |
| 0           | 0.0000115   | 0.00000708  |
| 0           | 0.000000503 | 0.000000143 |
| 0.000589577 | 0.000909816 | 0.000632059 |
| 0.000570625 | 0.000891849 | 0.000608022 |
| 0           | 0           | 0           |
| 0           | 0           | 0           |
| 0           | 0.000000314 | 9.17E-08    |
| 0           | 0.000000314 | 9.17E-08    |
| 0.000185175 | 0           | 0.0000543   |

|             |             |             |
|-------------|-------------|-------------|
| 0           | 0           | 0           |
| 0           | 0           | 0           |
| 0           | 0.0000101   | 0.00000653  |
| 0           | 0           | 0           |
| 0           | 0           | 0           |
| 0.000395735 | 0.000619235 | 0.000237864 |
| 0.000000193 | 0           | 0.000000058 |
| 0.0000595   | 0.0000776   | 0.00010443  |
| 0           | 0           | 0           |
| 0.00039401  | 0.000599539 | 0.000420806 |
| 0           | 0           | 0           |
| 0.00000383  | 0.0000064   | 0.00000497  |
| 0           | 0           | 0           |
| 0           | 0           | 0.00000192  |
| 0           | 0.00000938  | 0.00000631  |
| 0           | 0           | 0           |
| 0           | 0           | 0           |
| 0           | 0           | 0           |
| 0.000000109 | 0           | 3.42E-08    |
| 0.000000156 | 0           | 0.000000049 |
| 0           | 0           | 0           |
| 0           | 0           | 0           |
| 0           | 0.0000129   | 0.0000087   |
| 0           | 0           | 0           |
| 0           | 0.00000946  | 0.00000629  |
| 0           | 0           | 0           |
| 0           | 0           | 0           |
| 0.00000146  | 0.00000894  | 0.00000347  |
| 0           | 0           | 0           |
| 0           | 0           | 0           |
| 0           | 0.000000417 | 0.000000136 |
| 0           | 0.00000037  | 0.000000121 |
| 0.000301917 | 0.000335384 | 0.000359728 |
| 0.000630167 | 0.000742389 | 0.000591877 |
| 0.000630167 | 0.000742389 | 0.000591877 |
| 0           | 0.00000806  | 0.00000564  |
| 0.0000197   | 0.0000101   | 0.00000858  |
| 0           | 0           | 0           |
| 0           | 0.00000929  | 0.00000633  |
| 0           | 0.00000929  | 0.00000634  |
| 0           | 0           | 0.00385725  |
| 0           | 0           | 0.0146864   |
| 0           | 0           | 0           |
| 0           | 0           | 0           |
| 0           | 0           | 0.00801873  |
| 0           | 0           | 0.0044382   |
| 0           | 0           | 0.000802798 |

|            |             |             |
|------------|-------------|-------------|
| 0          | 0           | 0.00194242  |
| 0          | 0           | 0           |
| 0          | 0           | 0.0000685   |
| 0          | 0           | 0           |
| 0          | 0           | 0.00541951  |
| 0          | 0           | 0           |
| 0          | 0           | 0           |
| 0          | 0           | 0           |
| 0          | 0           | 0           |
| 0          | 0           | 0           |
| 0          | 0           | 0           |
| 0          | 0           | 0           |
| 0          | 0           | 0           |
| 0          | 0           | 0           |
| 0          | 0           | 0           |
| 0          | 0           | 0           |
| 0          | 0           | 0.00320651  |
| 0          | 0           | 0           |
| 0          | 0           | 0           |
| 0          | 0           | 0           |
| 0          | 0           | 0           |
| 0          | 0           | 0           |
| 0          | 0           | 0           |
| 0          | 0           | 0           |
| 0          | 0           | 0           |
| 0          | 0           | 0           |
| 0          | 0           | 0           |
| 0          | 0           | 0           |
| 0          | 0           | 0           |
| 0          | 0           | 0           |
| 0          | 0           | 0           |
| 0          | 0           | 0           |
| 0          | 0           | 0           |
| 0          | 0           | 0.00358436  |
| 0          | 0           | 0.00302967  |
| 0          | 0           | 0.00721597  |
| 0          | 0           | 0           |
| 0          | 0           | 0.00244165  |
| 0          | 0           | 0           |
| 0          | 0           | 0           |
| 0          | 0           | 0           |
| 0          | 0           | 0           |
| 0.00428342 | 0.000521065 | 0           |
| 0          | 0           | 0           |
| 0          | 0           | 0.000774627 |
| 0          | 0           | 0.0025781   |
| 0          | 0           | 0           |
| 0          | 0           | 0           |
| 0          | 0           | 0.0198963   |
| 0          | 0           | 0.000256669 |
| 0          | 0           | 0           |
| 0          | 0           | 0           |

|           |            |             |
|-----------|------------|-------------|
| 0         | 0          | 0           |
| 0         | 0          | 0           |
| 0         | 0          | 0           |
| 0         | 0          | 0.00145504  |
| 0         | 0          | 0           |
| 0         | 0          | 0           |
| 0         | 0          | 0           |
| 0         | 0          | 0.000996222 |
| 0         | 0          | 0.00335598  |
| 0         | 0.00174243 | 0           |
| 0         | 0          | 0           |
| 0         | 0          | 0           |
| 0         | 0          | 0           |
| 0         | 0          | 0           |
| 0         | 0          | 0           |
| 0         | 0          | 0           |
| 0         | 0          | 0.00215791  |
| 0         | 0          | 0           |
| 0         | 0          | 0.0072218   |
| 0         | 0          | 0           |
| 0         | 0          | 0.00509231  |
| 0         | 0          | 0.00115843  |
| 0         | 0          | 0           |
| 0         | 0          | 0.00111799  |
| 0         | 0          | 0           |
| 0         | 0          | 0           |
| 0.0039958 | 0.00498704 | 0           |
| 0         | 0          | 0           |
| 0         | 0          | 0           |
| 0         | 0          | 0.00145309  |
| 0         | 0          | 0.000283903 |
| 0         | 0          | 0.00062609  |
| 0         | 0          | 0           |
| 0         | 0          | 0           |
| 0         | 0          | 0           |
| 0         | 0          | 0.017621    |
| 0         | 0          | 0.00234     |
| 0         | 0          | 0.00487814  |
| 0         | 0          | 0           |
| 0         | 0          | 0           |
| 0         | 0          | 0.0000464   |
| 0         | 0          | 0           |
| 0         | 0          | 0.00231185  |
| 0         | 0          | 0.00122133  |
| 0         | 0.00110703 | 0           |
| 0         | 0          | 0.0022888   |
| 0         | 0          | 0           |

|             |             |             |
|-------------|-------------|-------------|
| 0           | 0           | 0           |
| 0           | 0           | 0.00136372  |
| 0           | 0           | 0.00123356  |
| 0           | 0           | 0.0161232   |
| 0           | 0           | 0.00175794  |
| 0           | 0           | 0           |
| 0.00580072  | 0.000220811 | 0           |
| 0.00577471  | 0           | 0           |
| 0.00178755  | 0.000372375 | 0           |
| 0           | 0           | 0           |
| 0           | 0           | 0           |
| 0           | 0           | 0           |
| 0           | 0           | 0.000990634 |
| 0           | 0           | 0           |
| 0           | 0           | 0.00153154  |
| 0           | 0           | 0.00203633  |
| 0           | 0           | 0           |
| 0           | 0           | 0           |
| 0           | 0           | 0           |
| 0           | 0           | 0           |
| 0           | 0           | 0           |
| 0           | 0           | 0.000361498 |
| 0.000270089 | 0           | 0           |
| 0.000721455 | 0.00229613  | 0           |
| 0           | 0           | 0.000380371 |
| 0           | 0           | 0           |
| 0           | 0           | 0           |
| 0           | 0           | 0           |
| 0           | 0           | 0           |
| 0           | 0           | 0           |
| 0           | 0           | 0           |
| 0           | 0           | 0           |
| 0           | 0           | 0.00128167  |
| 0           | 0           | 0           |
| 0           | 0           | 0           |
| 0           | 0           | 0           |
| 0           | 0           | 0.0000498   |
| 0           | 0           | 0           |
| 0           | 0           | 0           |
| 0           | 0           | 0.0000817   |
| 0           | 0           | 0.00989144  |
| 0           | 0           | 0           |
| 0           | 0           | 0           |
| 0           | 0           | 0.0000201   |
| 0           | 0           | 0           |
| 0           | 0           | 0           |



|             |             |             |
|-------------|-------------|-------------|
| 0           | 0           | 0           |
| 0           | 0           | 0           |
| 0           | 0           | 0           |
| 0           | 0           | 0           |
| 0           | 0           | 0           |
| 0           | 0           | 0           |
| 0           | 0           | 0.000000548 |
| 0           | 0           | 0           |
| 0           | 0           | 0           |
| 0           | 0           | 0           |
| 0           | 0           | 0           |
| 0           | 0           | 0.000002    |
| 0           | 0           | 0.00000274  |
| 0           | 0           | 0.00000605  |
| 0           | 0           | 0           |
| 0           | 0           | 0           |
| 0           | 0.000000119 | 0           |
| 3.91E-08    | 0           | 0           |
| 0           | 0           | 9.57E-08    |
| 0           | 0           | 0.00000114  |
| 0           | 0           | 0           |
| 0           | 0           | 0           |
| 0           | 0           | 0           |
| 0           | 0           | 0           |
| 0           | 0           | 0.00000115  |
| 0.000000434 | 0.000000824 | 0           |
| 0           | 0.000000197 | 0           |
| 0.000000147 | 0           | 0           |
| 0           | 0           | 0.000000887 |
| 0           | 0           | 0.00000328  |
| 0           | 0           | 0.000000501 |
| 0           | 0           | 0           |
| 0           | 0           | 0           |
| 0           | 0           | 0           |
| 0           | 0           | 0           |
| 0           | 0           | 0           |
| 0           | 0.00000015  | 0           |
| 0.00000017  | 0           | 0           |
| 0           | 0           | 0.00000108  |
| 0.00000047  | 0           | 0           |
| 0.000000988 | 0.00000357  | 0           |
| 0           | 0           | 0           |
| 0           | 0           | 0           |

|            |   |            |
|------------|---|------------|
| 0          | 0 | 0          |
| 0          | 0 | 0          |
| 0          | 0 | 0          |
| 0          | 0 | 0          |
| 0          | 0 | 0          |
| 0          | 0 | 0          |
| 0          | 0 | 0          |
| 0          | 0 | 0.00000526 |
| 0          | 0 | 0          |
| 0          | 0 | 0          |
| 0          | 0 | 0          |
| 0          | 0 | 0          |
| 0          | 0 | 0          |
| 0          | 0 | 0          |
| 0          | 0 | 0.0000266  |
| 0          | 0 | 0.0000261  |
| 0          | 0 | 0.0000584  |
| 0          | 0 | 0          |
| 0          | 0 | 0          |
| 0          | 0 | 0.00000293 |
| 0          | 0 | 0          |
| 0          | 0 | 0.00000652 |
| 0          | 0 | 0          |
| 0          | 0 | 0          |
| 0.00000127 | 0 | 0          |
| 0          | 0 | 0          |
| 0          | 0 | 0.00000373 |
| 0          | 0 | 0          |
| 0          | 0 | 0          |
| 0          | 0 | 0          |
| 0          | 0 | 0.00000294 |
| 0          | 0 | 0.00000695 |
| 0          | 0 | 0          |
| 0.00000139 | 0 | 0          |
| 0          | 0 | 0          |
| 0          | 0 | 0.00000349 |
| 0          | 0 | 0          |
| 0          | 0 | 0.0000241  |
| 0          | 0 | 0          |
| 0          | 0 | 0          |
| 0          | 0 | 0          |
| 0          | 0 | 0.00000425 |
| 0          | 0 | 0          |
| 0          | 0 | 0          |
| 0          | 0 | 0          |
| 0          | 0 | 0.0000196  |

|            |             |             |
|------------|-------------|-------------|
| 0          | 0           | 0.000000343 |
| 0          | 0           | 0           |
| 0          | 0           | 0           |
| 0          | 0           | 0           |
| 0          | 0           | 0           |
| 0          | 0           | 0           |
| 0          | 0           | 0           |
| 0          | 0           | 0           |
| 0          | 0           | 0           |
| 0          | 0           | 0           |
| 0          | 0           | 0           |
| 0          | 0           | 0.00000189  |
| 0          | 0           | 0           |
| 0          | 0           | 0           |
| 0          | 0           | 0           |
| 0          | 0           | 0           |
| 0          | 0.000000105 | 0           |
| 0          | 0           | 0.000000703 |
| 0          | 0           | 0           |
| 0          | 0           | 0.000000728 |
| 0          | 0           | 0.0000247   |
| 0          | 0           | 0           |
| 0          | 0           | 0.000000291 |
| 0          | 0           | 0.000000274 |
| 0          | 0           | 0           |
| 0          | 0           | 0           |
| 0          | 0           | 0           |
| 0          | 0           | 0           |
| 0          | 0           | 0           |
| 0          | 0           | 0           |
| 0          | 0           | 0           |
| 0          | 0           | 0.000000431 |
| 0          | 0           | 0           |
| 0          | 0           | 0           |
| 0          | 0           | 0           |
| 0          | 0           | 0           |
| 0          | 0           | 0           |
| 0          | 0           | 0.00000258  |
| 0          | 0           | 0           |
| 0          | 0           | 0           |
| 0          | 0           | 0           |
| 0.00000153 | 0.000000334 | 0           |
| 0          | 0           | 0.0000012   |
| 0          | 0           | 0           |
| 0          | 0           | 0           |
| 0          | 0           | 0           |

|           |             |             |
|-----------|-------------|-------------|
| 0         | 0           | 0           |
| 0         | 8.66E-08    | 0           |
| 0         | 0           | 0.0000226   |
| 0         | 0           | 9.55E-08    |
| 0         | 0           | 0           |
| 0         | 0           | 0.0000201   |
| 0         | 0           | 0           |
| 0         | 0           | 0.00000142  |
| 0         | 0           | 0.000000572 |
| 0         | 0           | 0           |
| 0         | 0           | 0.000008    |
| 0         | 0           | 0           |
| 0         | 0           | 0           |
| 0         | 0           | 0           |
| 0         | 0           | 0.000000924 |
| 0         | 0           | 0           |
| 0         | 0           | 0           |
| 0         | 0           | 0           |
| 0         | 0           | 0           |
| 0         | 0           | 3.43E-08    |
| 0         | 0           | 0.0000049   |
| 0         | 0           | 0           |
| 0         | 0           | 0.00000209  |
| 0         | 0           | 0           |
| 0         | 0           | 6.12E-08    |
| 0         | 0           | 0           |
| 0         | 0           | 0.000000105 |
| 0         | 0           | 0           |
| 0         | 0           | 0.00000005  |
| 0         | 0.000000178 | 0           |
| 0         | 0           | 0.0000287   |
| 0.0000002 | 0.000000114 | 0           |
| 0         | 0           | 0.00000094  |
| 0         | 0           | 0.000000226 |
| 0         | 0           | 0           |
| 0         | 0           | 0.00000111  |
| 0         | 0.000000309 | 0           |
| 0         | 0           | 0.00000776  |
| 0         | 0           | 0.000023    |
| 0         | 0           | 0           |
| 0         | 0           | 0           |
| 0         | 0           | 0.00000601  |
| 0         | 0           | 5.96E-08    |
| 0         | 0           | 0           |
| 0         | 0           | 0.000000478 |
| 0         | 0           | 0           |
| 0         | 0           | 0           |



|            |             |             |
|------------|-------------|-------------|
| 0          | 0           | 0           |
| 0          | 0           | 0.00000169  |
| 0          | 0           | 0.000000794 |
| 0          | 0           | 0           |
| 0          | 0           | 0.00000104  |
| 0.00000231 | 0.00000274  | 0           |
| 0          | 0           | 0           |
| 0          | 0           | 0.00000146  |
| 0          | 0           | 0           |
| 0          | 0           | 5.54E-08    |
| 0          | 0           | 0           |
| 0          | 0           | 0           |
| 0          | 0           | 0.0000172   |
| 0          | 0           | 0           |
| 0          | 0           | 0           |
| 0          | 0           | 0           |
| 0          | 0           | 4.63E-08    |
| 0          | 0           | 0           |
| 0          | 0           | 0.00000367  |
| 0          | 0           | 0.000000067 |
| 0          | 0.000000105 | 0           |
| 0          | 0           | 0.00000106  |
| 0          | 0           | 0           |
| 0          | 0           | 0           |
| 0          | 0           | 0.000000671 |
| 0          | 0           | 6.74E-08    |
| 0          | 0           | 0.0000167   |
| 0          | 0           | 6.87E-08    |
| 0          | 0           | 0           |
| 0.00000018 | 4.66E-08    | 0           |
| 0.00000285 | 0           | 0           |
| 0          | 0           | 0           |
| 0          | 0           | 0.000000817 |
| 0          | 0           | 0           |
| 0          | 0           | 0.000000258 |
| 0          | 0           | 0.000001    |
| 0          | 0           | 0           |
| 0          | 0           | 0           |
| 0          | 0           | 0           |
| 0          | 0           | 0           |
| 0          | 0           | 0           |
| 0          | 0           | 0.000000307 |
| 5.58E-08   | 0           | 0           |
| 0.00000115 | 0.00000289  | 0           |
| 0          | 0           | 0.000000156 |
| 0          | 0           | 0           |
| 0          | 0           | 0           |

|            |            |             |
|------------|------------|-------------|
| 0          | 0          | 0           |
| 0          | 0          | 0           |
| 0          | 0          | 0           |
| 0          | 0          | 0.000000965 |
| 0          | 0          | 0           |
| 0          | 0          | 0           |
| 0          | 0          | 0           |
| 0          | 0          | 0           |
| 0          | 0          | 0.00000691  |
| 0          | 0          | 0           |
| 0          | 0          | 0           |
| 0          | 0          | 0.0000232   |
| 0          | 0          | 4.98E-08    |
| 0          | 0          | 0           |
| 0          | 0          | 0.00000333  |
| 0          | 0          | 0.00000622  |
| 0          | 0          | 0           |
| 0          | 0          | 0           |
| 0          | 0          | 0           |
| 0          | 0          | 0           |
| 0.00000631 | 0.00000667 | 0           |
| 0          | 0          | 0           |
| 0          | 0          | 0           |
| 0          | 0          | 0           |
| 0          | 0          | 0           |
| 0          | 0          | 0.00000593  |
| 0          | 0          | 0           |
| 0          | 0          | 0.00000984  |
| 0          | 0          | 0           |
| 0          | 0          | 0.00000145  |
| 0          | 0          | 0           |
| 0          | 0          | 0.0000178   |
| 0          | 0          | 0.00000719  |
| 0          | 0          | 0           |
| 0.00000246 | 0          | 0           |
| 0.00000104 | 0.00000263 | 0           |
| 0          | 0          | 0           |
| 0          | 0          | 0           |
| 0          | 0          | 0           |
| 0          | 0          | 0           |
| 0          | 0          | 0           |
| 0          | 0          | 0           |
| 0          | 0          | 0.00000364  |
| 0          | 0          | 0           |
| 0          | 0          | 0           |
| 0          | 0          | 0           |

|            |             |             |
|------------|-------------|-------------|
| 0          | 0           | 0           |
| 0          | 0           | 0           |
| 0          | 0           | 0.0000258   |
| 0          | 0           | 0           |
| 0          | 0           | 0           |
| 0          | 0           | 0           |
| 0          | 0           | 0           |
| 0          | 0           | 0.0000205   |
| 0          | 0           | 0           |
| 0          | 0           | 0           |
| 0          | 0           | 0           |
| 0          | 0           | 0           |
| 0          | 0           | 0           |
| 0          | 0           | 0           |
| 0          | 0           | 0           |
| 0          | 0           | 0           |
| 0          | 0           | 0           |
| 0          | 0           | 0           |
| 0          | 0.000000115 | 0           |
| 0          | 0           | 0.000000704 |
| 0          | 0           | 0           |
| 0          | 0           | 0.000000731 |
| 0          | 0           | 0.000025    |
| 0          | 0           | 0           |
| 0          | 0           | 0           |
| 0          | 0           | 0           |
| 0          | 0           | 0           |
| 0          | 0           | 0           |
| 0          | 0           | 0           |
| 0          | 0           | 0           |
| 0          | 0.000000132 | 0           |
| 0          | 0           | 0           |
| 0          | 0           | 0.00000339  |
| 0          | 0           | 0           |
| 0          | 0           | 0           |
| 0          | 0           | 0           |
| 0          | 0           | 0.000000678 |
| 0          | 0           | 0           |
| 0          | 0           | 0           |
| 0          | 0           | 0           |
| 0          | 0           | 0           |
| 0.00000596 | 0.000000612 | 0           |
| 0          | 0           | 0           |
| 0          | 0           | 0.0000182   |



|          |             |            |
|----------|-------------|------------|
| 0        | 0           | 0          |
| 0        | 0           | 0          |
| 0        | 0           | 0          |
| 0        | 0           | 0          |
| 0        | 0           | 0          |
| 0        | 0           | 0          |
| 0        | 0           | 0          |
| 0        | 0           | 0          |
| 0        | 0           | 0.00000157 |
| 0        | 0           | 0          |
| 0        | 0           | 0          |
| 0        | 0           | 6.25E-08   |
| 0        | 0           | 0.0000303  |
| 0        | 0           | 0.00000229 |
| 0        | 0           | 0          |
| 0        | 0           | 0          |
| 0        | 0           | 0          |
| 0        | 0           | 0          |
| 0        | 0           | 0          |
| 0        | 0           | 0          |
| 0        | 0           | 0          |
| 0        | 0           | 0          |
| 0        | 0           | 0          |
| 0        | 0           | 0          |
| 0        | 0           | 0          |
| 0        | 0           | 0          |
| 0        | 0           | 0          |
| 0        | 0           | 0          |
| 0        | 0           | 0          |
| 0        | 0           | 0          |
| 0        | 0           | 0          |
| 0        | 0           | 0          |
| 0        | 0           | 0          |
| 0        | 0           | 0          |
| 0        | 0           | 0          |
| 0        | 0           | 0          |
| 0        | 0           | 0          |
| 0        | 0.000000288 | 0          |
| 0        | 0           | 0          |
| 0        | 0           | 0          |
| 0        | 0           | 0          |
| 0        | 0.000000224 | 0          |
| 0        | 0           | 3.82E-08   |
| 0        | 0           | 0          |
| 9.34E-08 | 0           | 0          |
| 0        | 0           | 0          |
| 0        | 0           | 0          |
| 0        | 0.000000127 | 0          |
| 0        | 0           | 0          |
| 0        | 0           | 0          |
| 0        | 0           | 0          |
| 0        | 0           | 0          |
| 0        | 0           | 0.00000257 |
| 0        | 0           | 0          |
| 0        | 0           | 0          |
| 0        | 0           | 0          |

|             |             |             |
|-------------|-------------|-------------|
| 0           | 0           | 0           |
| 0           | 0           | 0           |
| 0           | 0           | 0           |
| 0           | 0           | 0           |
| 0           | 0           | 0           |
| 0           | 0           | 0           |
| 0           | 0           | 0           |
| 0           | 0           | 0           |
| 0           | 0.00000013  | 0           |
| 0.000000516 | 0           | 0           |
| 0           | 0           | 0           |
| 0           | 0           | 0.0000002   |
| 0           | 0           | 0           |
| 0           | 0           | 0.000000726 |
| 0           | 0           | 0           |
| 0           | 2.94E-08    | 0           |
| 0           | 0           | 0           |
| 0           | 0           | 0.000000317 |
| 0           | 0           | 0           |
| 0           | 0           | 0           |
| 0           | 0           | 0           |
| 0.000000195 | 0           | 0           |
| 0           | 0           | 0           |
| 0           | 0           | 0           |
| 0           | 0           | 0.0000193   |
| 0           | 0           | 0           |
| 0           | 0           | 0           |
| 0           | 0           | 0           |
| 0           | 0           | 0           |
| 0           | 0           | 0.0000102   |
| 0           | 0           | 0           |
| 0           | 0           | 0           |
| 0           | 0           | 0           |
| 0           | 0           | 2.73E-08    |
| 0           | 0.000000146 | 0           |
| 0           | 0           | 0.0000386   |
| 0.000000146 | 6.46E-08    | 0           |
| 0           | 0           | 0           |
| 0.000000331 | 0           | 0           |
| 0           | 0           | 0           |
| 0           | 0           | 0           |
| 0           | 0           | 0           |
| 0.00000016  | 0           | 0           |
| 0           | 0           | 0           |
| 0           | 0           | 0           |
| 0           | 0.000000159 | 0           |
| 0           | 0           | 0           |







|            |             |             |
|------------|-------------|-------------|
| 0          | 0           | 0           |
| 0          | 0           | 0           |
| 0          | 0           | 0.00000139  |
| 0          | 0           | 0.00000175  |
| 0          | 0           | 3.76E-08    |
| 0          | 0           | 7.93E-08    |
| 0          | 0           | 0           |
| 0          | 0           | 0           |
| 0          | 0           | 0.000000117 |
| 0          | 0.000000133 | 0           |
| 0          | 0           | 0.000000607 |
| 0          | 0           | 0           |
| 0          | 0           | 0.000000543 |
| 0          | 0           | 0           |
| 0          | 0           | 0           |
| 0          | 0           | 0           |
| 0          | 0           | 0.000000991 |
| 0          | 0           | 0           |
| 0          | 0           | 0.000000267 |
| 0          | 0           | 0.000000245 |
| 0          | 0           | 0           |
| 0          | 0           | 0           |
| 0          | 0           | 0           |
| 0          | 0           | 0.00000142  |
| 0          | 0           | 0           |
| 0          | 0           | 0.00000318  |
| 0          | 0           | 0           |
| 0          | 0           | 0.00000273  |
| 0          | 0           | 0           |
| 0          | 0           | 0           |
| 0          | 0           | 0.0000214   |
| 0          | 0           | 0           |
| 0          | 0           | 0           |
| 0          | 0           | 7.25E-08    |
| 0          | 0           | 0           |
| 0          | 0           | 0.00000052  |
| 0          | 0           | 0           |
| 0          | 0           | 0.00000213  |
| 0          | 0           | 0           |
| 0          | 0           | 0           |
| 0          | 0           | 0.000000156 |
| 0          | 0           | 6.92E-08    |
| 0          | 0.000000208 | 0           |
| 0          | 0           | 0           |
| 0          | 0           | 0.0000363   |
| 0.00000344 | 0           | 0           |
| 5.41E-08   | 4.28E-08    | 0           |







|   |             |             |
|---|-------------|-------------|
| 0 | 0           | 0           |
| 0 | 0           | 0.000000251 |
| 0 | 0           | 0.00000105  |
| 0 | 0           | 0           |
| 0 | 0           | 0           |
| 0 | 0           | 0           |
| 0 | 0           | 0           |
| 0 | 0           | 0           |
| 0 | 0           | 0.000000254 |
| 0 | 0           | 0           |
| 0 | 0           | 0           |
| 0 | 0           | 0           |
| 0 | 0           | 0           |
| 0 | 0           | 0.00000018  |
| 0 | 0           | 0.0000234   |
| 0 | 0           | 5.81E-08    |
| 0 | 0           | 0           |
| 0 | 0           | 0.000000467 |
| 0 | 0           | 0           |
| 0 | 0           | 0           |
| 0 | 0           | 0           |
| 0 | 0           | 0           |
| 0 | 0           | 0           |
| 0 | 0           | 0           |
| 0 | 0           | 0           |
| 0 | 0           | 0           |
| 0 | 0           | 0.000000903 |
| 0 | 0           | 0           |
| 0 | 0           | 0           |
| 0 | 0           | 0.0000218   |
| 0 | 0           | 0.000000878 |
| 0 | 0           | 0           |
| 0 | 0           | 0           |
| 0 | 0           | 0           |
| 0 | 0.000000167 | 0           |
| 0 | 0           | 0.000000882 |
| 0 | 0           | 0           |
| 0 | 0           | 0.00000803  |
| 0 | 0           | 0           |
| 0 | 0           | 0           |
| 0 | 0           | 0.000011    |
| 0 | 0           | 0.00000618  |
| 0 | 0           | 3.73E-08    |
| 0 | 0           | 0           |
| 0 | 0           | 0.000000397 |
| 0 | 0           | 0           |
| 0 | 0           | 0           |
| 0 | 0           | 0           |

|           |             |             |
|-----------|-------------|-------------|
| 0         | 0           | 0.000000572 |
| 0         | 0           | 0           |
| 0         | 0           | 0           |
| 0         | 0           | 0           |
| 0         | 0           | 0           |
| 0         | 0           | 0           |
| 0         | 0           | 0           |
| 0         | 0           | 0           |
| 0         | 0           | 0           |
| 0         | 0           | 0           |
| 0         | 0           | 0           |
| 0         | 0           | 0           |
| 0         | 0           | 0           |
| 0         | 0           | 0           |
| 0         | 0           | 0.00000595  |
| 0         | 0           | 0           |
| 0         | 0           | 0.00000239  |
| 0         | 0           | 0           |
| 0         | 0           | 0           |
| 0.0000067 | 0.000000509 | 0           |
| 0         | 0           | 0.000000641 |
| 0         | 0           | 0           |
| 0         | 0           | 0           |
| 0         | 0           | 0           |
| 0         | 0           | 0.00000461  |
| 0         | 0           | 0.000000116 |
| 0         | 0           | 0           |
| 0         | 0           | 0           |
| 0         | 0           | 0.00000122  |
| 0         | 0.00000149  | 0           |
| 0         | 0           | 0           |
| 0         | 0           | 0           |
| 0         | 0           | 0           |
| 0         | 0           | 0           |
| 0         | 0           | 0           |
| 0         | 0           | 0           |
| 0         | 0           | 0.00000226  |
| 0         | 0           | 0.00000072  |
| 0         | 0           | 0           |
| 0         | 0           | 0.000000994 |
| 0         | 0           | 0           |
| 0         | 0           | 0           |
| 0         | 0           | 0.00000147  |
| 0         | 0           | 0           |
| 0         | 0           | 5.59E-08    |
| 0         | 0           | 0           |
| 0         | 0           | 0.000000218 |
| 0         | 0           | 0           |
| 0         | 0           | 0           |

|             |             |             |
|-------------|-------------|-------------|
| 0           | 0           | 0           |
| 0           | 0           | 0.000000675 |
| 0           | 0           | 0           |
| 0           | 0           | 0           |
| 0           | 0           | 0.000000707 |
| 0           | 0           | 4.95E-08    |
| 0           | 0           | 0.0000208   |
| 0           | 0           | 0           |
| 0           | 0           | 0           |
| 0.00002     | 0           | 0           |
| 0.00000285  | 0           | 0           |
| 6.08E-08    | 0           | 0           |
| 0           | 0           | 0           |
| 0           | 0           | 0.000000994 |
| 0           | 0           | 0           |
| 0           | 0           | 0.000000184 |
| 0           | 0           | 0           |
| 0           | 0           | 0           |
| 0           | 0           | 0           |
| 0           | 0           | 0           |
| 0           | 0           | 0.000000262 |
| 0.000000142 | 0           | 0           |
| 0.000000976 | 0.00000281  | 0           |
| 0           | 0           | 9.99E-08    |
| 0           | 0           | 0           |
| 0           | 0           | 0           |
| 0           | 0           | 0           |
| 0           | 0           | 0           |
| 0           | 0           | 0           |
| 0           | 0           | 0           |
| 0           | 0           | 0.00000569  |
| 0           | 0           | 0           |
| 0           | 0           | 0           |
| 0           | 0           | 0           |
| 0           | 0.000000154 | 0           |
| 0           | 0           | 0           |
| 0           | 0           | 0           |
| 0           | 0           | 0           |
| 0           | 0           | 0           |
| 0           | 0.000000171 | 0           |
| 0           | 0.000000388 | 0           |
| 0           | 0.000000305 | 0           |
| 0           | 0           | 0           |
| 0           | 0           | 4.65E-08    |
| 0           | 0           | 4.65E-08    |

|             |             |             |
|-------------|-------------|-------------|
| 0           | 0           | 0.0000298   |
| 0           | 0           | 0.000000914 |
| 0           | 0           | 0.00000341  |
| 0           | 0           | 8.65E-08    |
| 0           | 0           | 0           |
| 0           | 0           | 0.000000352 |
| 0           | 0           | 0           |
| 0           | 0           | 0           |
| 0           | 0           | 0           |
| 0           | 0           | 0.000000306 |
| 0           | 0           | 0           |
| 0           | 0           | 0           |
| 0           | 0           | 0           |
| 0           | 0           | 0           |
| 0           | 0           | 0           |
| 0           | 0           | 0.00000303  |
| 0           | 0           | 0           |
| 0           | 0           | 0.00000282  |
| 0           | 0           | 0           |
| 0           | 0           | 0.00000138  |
| 0           | 0           | 0           |
| 0           | 0           | 0           |
| 0           | 0           | 0           |
| 0           | 0.00000137  | 0           |
| 0           | 0           | 0           |
| 0           | 0           | 0.000000126 |
| 0           | 0           | 0.00000031  |
| 0           | 0           | 0           |
| 0           | 0           | 0.00000105  |
| 0           | 0           | 0           |
| 0           | 0           | 0.000000267 |
| 0           | 0.000000187 | 0           |
| 0           | 0           | 0.000000882 |
| 0           | 0           | 0.000000841 |
| 0           | 0           | 0.0000574   |
| 0           | 0           | 0.00000122  |
| 0.000000328 | 0           | 0           |
| 0.000000941 | 0.00000303  | 0           |
| 0           | 0           | 0.000000331 |
| 0           | 0           | 0           |
| 0           | 0           | 0           |
| 0           | 0           | 0           |
| 0           | 0           | 0           |
| 0           | 0           | 0.0000221   |
| 0           | 0           | 0.000000946 |
| 0           | 0           | 0.00000291  |
| 0           | 0           | 0           |



|             |             |             |
|-------------|-------------|-------------|
| 0           | 0           | 0           |
| 0           | 0           | 0           |
| 0           | 0           | 0           |
| 0           | 0           | 0           |
| 0           | 0           | 0           |
| 0           | 0           | 0.00000246  |
| 0           | 0           | 0.00000313  |
| 0           | 0           | 0.00000608  |
| 0           | 0           | 0           |
| 0           | 0           | 0.00000269  |
| 0           | 0           | 0           |
| 0           | 0           | 0.000000885 |
| 0           | 0           | 0           |
| 0           | 0           | 0.000017    |
| 0           | 0           | 0.000000227 |
| 0           | 0           | 0           |
| 0           | 0           | 0           |
| 0           | 0           | 0           |
| 0           | 0           | 4.41E-08    |
| 0           | 0           | 0           |
| 0           | 0           | 0           |
| 0           | 0           | 0           |
| 0           | 0           | 0           |
| 0           | 0           | 0.00000934  |
| 0           | 0           | 0           |
| 0           | 0           | 0.000000849 |
| 0           | 0           | 0           |
| 0           | 0           | 0.00000149  |
| 0           | 0           | 0           |
| 0           | 0           | 0           |
| 0           | 0           | 0.00000213  |
| 0           | 0           | 6.69E-08    |
| 0           | 0           | 0           |
| 0           | 0           | 0           |
| 0           | 0           | 0.00000345  |
| 0           | 0           | 0           |
| 0           | 0           | 0.00000411  |
| 0           | 0           | 0           |
| 0           | 0           | 0           |
| 0           | 0           | 0.0000233   |
| 0           | 0           | 0           |
| 0.000000221 | 0.000000086 | 0           |
| 0.00000248  | 0           | 0           |
| 2.77E-08    | 0           | 0           |
| 0           | 0           | 0           |
| 0           | 0           | 0.00000112  |
| 0           | 0           | 0           |



|             |             |             |
|-------------|-------------|-------------|
| 0           | 0           | 0           |
| 0           | 0           | 0.00000218  |
| 0           | 0           | 0.00000308  |
| 0           | 0           | 0.00000623  |
| 0           | 0           | 0           |
| 0           | 0           | 0           |
| 0           | 0           | 0           |
| 0.00000207  | 0.00000262  | 0           |
| 0           | 0           | 0           |
| 0           | 0.0000001   | 0           |
| 0.0000189   | 0           | 0           |
| 0.000000239 | 6.39E-08    | 0           |
| 0.00000277  | 0           | 0           |
| 0.000000079 | 0           | 0           |
| 0           | 0           | 0.000000168 |
| 0           | 0           | 0.00000133  |
| 0           | 0           | 0           |
| 0           | 0           | 0           |
| 0           | 0           | 0           |
| 0           | 0           | 0           |
| 0           | 0           | 4.91E-08    |
| 0           | 0           | 0           |
| 0           | 0.000000216 | 0           |
| 0           | 0           | 0.000000137 |
| 0           | 0           | 0.0000231   |
| 0           | 0           | 4.94E-08    |
| 0           | 0           | 0.000000355 |
| 0           | 0           | 0.000000237 |
| 0           | 0           | 0           |
| 0           | 0           | 0           |
| 0           | 0           | 0           |
| 0           | 0           | 0           |
| 0           | 0           | 0           |
| 0           | 0           | 0.000000663 |
| 0           | 0           | 0           |
| 0           | 0           | 0.000000743 |
| 0           | 0           | 0.00000136  |
| 0           | 0           | 0           |
| 0.0000191   | 0           | 0           |
| 0.00000011  | 0           | 0           |
| 0           | 0           | 0           |
| 0           | 0           | 0           |
| 0.00000086  | 0.00000272  | 0           |
| 0           | 0           | 0           |



|             |             |             |
|-------------|-------------|-------------|
| 0           | 0           | 0           |
| 0           | 0           | 0           |
| 0           | 0           | 0           |
| 0           | 0           | 0           |
| 0           | 0           | 0           |
| 0           | 0           | 0           |
| 0           | 0           | 0           |
| 0           | 0           | 0           |
| 0           | 0           | 0.0000241   |
| 0           | 0.000000119 | 0           |
| 0           | 0           | 0.0000138   |
| 0           | 0           | 5.74E-08    |
| 0           | 0           | 0           |
| 0           | 0           | 7.86E-08    |
| 0           | 0           | 0           |
| 0           | 0.0000018   | 0           |
| 0           | 0           | 0           |
| 0           | 0           | 0.00000216  |
| 0           | 0           | 0           |
| 0           | 0           | 0.00000185  |
| 0           | 0           | 0           |
| 0           | 0           | 0           |
| 0           | 0           | 0           |
| 0           | 0           | 0           |
| 0           | 0           | 0.000000242 |
| 0.00000321  | 0           | 0           |
| 0.00000338  | 0           | 0           |
| 0           | 0           | 0.00000103  |
| 0.000000388 | 0           | 0           |
| 0.00000115  | 0.00000361  | 0           |
| 0           | 0           | 0           |
| 0           | 0           | 0.000000661 |
| 0           | 0           | 0           |
| 0           | 0           | 0           |
| 0           | 0           | 0           |
| 0           | 0           | 0           |
| 0           | 0           | 0           |
| 0           | 0           | 0           |
| 0           | 0           | 0           |
| 0           | 0           | 0           |
| 0           | 6.64E-08    | 0           |
| 0           | 0           | 0.00000127  |
| 0           | 0           | 0.00000591  |
| 0           | 0           | 0.0000219   |
| 0           | 0           | 0           |
| 0           | 0           | 0           |
| 0           | 0           | 0.000000341 |

|   |   |             |
|---|---|-------------|
| 0 | 0 | 0           |
| 0 | 0 | 0           |
| 0 | 0 | 0           |
| 0 | 0 | 0           |
| 0 | 0 | 0           |
| 0 | 0 | 0           |
| 0 | 0 | 0           |
| 0 | 0 | 0           |
| 0 | 0 | 0           |
| 0 | 0 | 0.000000336 |
| 0 | 0 | 0           |
| 0 | 0 | 0           |
| 0 | 0 | 0           |
| 0 | 0 | 0           |
| 0 | 0 | 0           |
| 0 | 0 | 0           |
| 0 | 0 | 0           |
| 0 | 0 | 0           |
| 0 | 0 | 0           |
| 0 | 0 | 0           |
| 0 | 0 | 0           |
| 0 | 0 | 0           |
| 0 | 0 | 0           |
| 0 | 0 | 0           |
| 0 | 0 | 0           |
| 0 | 0 | 0           |
| 0 | 0 | 0.00000241  |
| 0 | 0 | 0.00000272  |
| 0 | 0 | 0.00000603  |
| 0 | 0 | 0           |
| 0 | 0 | 0.0000026   |
| 0 | 0 | 0           |
| 0 | 0 | 0.000000696 |
| 0 | 0 | 0           |
| 0 | 0 | 0.0000179   |
| 0 | 0 | 0.000000192 |
| 0 | 0 | 0           |
| 0 | 0 | 0           |
| 0 | 0 | 0           |
| 0 | 0 | 4.77E-08    |
| 0 | 0 | 0           |
| 0 | 0 | 0           |
| 0 | 0 | 0.000000366 |
| 0 | 0 | 0           |
| 0 | 0 | 0.00000933  |
| 0 | 0 | 0           |
| 0 | 0 | 0           |
| 0 | 0 | 0           |
| 0 | 0 | 0.00000203  |
| 0 | 0 | 7.05E-08    |
| 0 | 0 | 0           |
| 0 | 0 | 0.00000384  |
| 0 | 0 | 0           |



|             |             |             |
|-------------|-------------|-------------|
| 0           | 0           | 0           |
| 0           | 0           | 2.31E-08    |
| 0           | 0           | 0           |
| 0           | 0           | 0.0000219   |
| 0           | 0           | 8.29E-08    |
| 0           | 0           | 0           |
| 0           | 0           | 0.0000201   |
| 0           | 0           | 0           |
| 0           | 0           | 0           |
| 0           | 0           | 0.0000139   |
| 0           | 0           | 0.00000572  |
| 0           | 0           | 0           |
| 0           | 0           | 0.00000784  |
| 0           | 0           | 0           |
| 0           | 0           | 0           |
| 0           | 0           | 0           |
| 0           | 0           | 0.00000085  |
| 0           | 0           | 0           |
| 0           | 0           | 0           |
| 0           | 0           | 0           |
| 0           | 0           | 0           |
| 0           | 0           | 3.37E-08    |
| 0           | 0           | 0.00000463  |
| 0           | 0           | 0           |
| 0           | 0           | 0           |
| 0           | 0           | 0           |
| 0           | 0           | 0.00000903  |
| 0           | 0           | 0.0000334   |
| 0           | 0           | 0           |
| 0           | 0           | 0           |
| 0           | 0           | 0           |
| 0.00000117  | 0.000000881 | 0           |
| 0           | 0           | 0.000000181 |
| 0           | 0           | 0           |
| 0           | 0           | 0           |
| 0           | 0           | 0           |
| 0           | 0.000000113 | 0           |
| 0           | 0           | 0           |
| 0           | 0           | 2.19E-08    |
| 0.000000429 | 0.000000506 | 0           |
| 0           | 0           | 0.000000761 |
| 0           | 0           | 0           |
| 0           | 0           | 0           |
| 0           | 0.000000399 | 0           |
| 0           | 0           | 0.0000208   |
| 0           | 0           | 0           |
| 0           | 0           | 0.000000353 |

|             |             |             |
|-------------|-------------|-------------|
| 0           | 0           | 0.000000693 |
| 0           | 0           | 0           |
| 0           | 0           | 0.0000138   |
| 0           | 0           | 0.000000317 |
| 0           | 0           | 0           |
| 0           | 0           | 0           |
| 0           | 0.000000906 | 0           |
| 0           | 0           | 0           |
| 0           | 0           | 0.000000235 |
| 0           | 0           | 0           |
| 0           | 0           | 0           |
| 0           | 0           | 0.000000538 |
| 0           | 0           | 0           |
| 0           | 0           | 0           |
| 0           | 0           | 0           |
| 0           | 0.000000118 | 0           |
| 0           | 0           | 7.54E-08    |
| 0           | 0           | 0.0000153   |
| 0           | 0           | 0           |
| 0           | 0           | 0.000000295 |
| 0           | 0           | 0.000000266 |
| 0           | 0           | 0           |
| 0           | 0           | 0           |
| 0           | 0           | 0           |
| 0           | 0           | 0           |
| 0           | 0           | 0           |
| 0           | 0           | 0           |
| 0           | 0           | 0           |
| 0           | 0           | 0.00000199  |
| 0           | 0           | 0           |
| 0           | 0           | 0           |
| 0           | 0           | 0           |
| 0           | 0           | 0           |
| 0           | 0           | 0           |
| 0           | 0           | 0           |
| 0           | 0           | 4.67E-08    |
| 0           | 0           | 0           |
| 0           | 0           | 0           |
| 0           | 0           | 0           |
| 0           | 0           | 0.0000106   |
| 0           | 0           | 0.0000178   |
| 0           | 0           | 0           |
| 0           | 0           | 0           |
| 0           | 0           | 0           |
| 0           | 0.000000219 | 0           |
| 0           | 0           | 0.0000254   |
| 0.000000101 | 0           | 0           |

|             |             |             |
|-------------|-------------|-------------|
| 0.000000085 | 0           | 0           |
| 0           | 0.000000233 | 0           |
| 0           | 0.00000015  | 0           |
| 0           | 0           | 0           |
| 0           | 0           | 0           |
| 0           | 0.000000133 | 0           |
| 0.000000159 | 0           | 0           |
| 0           | 0           | 0           |
| 0           | 0           | 0           |
| 0           | 0           | 0           |
| 0           | 0           | 0.0000098   |
| 0           | 0           | 0.00000318  |
| 0           | 0           | 0           |
| 0           | 0           | 0           |
| 0           | 0           | 0           |
| 0           | 0           | 0.000000739 |
| 0           | 0           | 0           |
| 0           | 0           | 0           |
| 0           | 0           | 0           |
| 0           | 0           | 0           |
| 0           | 0           | 0           |
| 0           | 0           | 0           |
| 0           | 0           | 0           |
| 0           | 0           | 0.0000112   |
| 0           | 0           | 0           |
| 0           | 0           | 0.0000207   |
| 0           | 0           | 0           |
| 0           | 0           | 0.000000783 |
| 0           | 0           | 0           |
| 0           | 0           | 0           |
| 0           | 0           | 0           |
| 0           | 0           | 0           |
| 0           | 0           | 0           |
| 0           | 0           | 0           |
| 0           | 0           | 0           |
| 0           | 0           | 0           |
| 0           | 0           | 0           |
| 0           | 0           | 0           |
| 0           | 0           | 0           |
| 0           | 0           | 0           |
| 0           | 0           | 0           |
| 0           | 0           | 0           |
| 0           | 0           | 0           |
| 0           | 0           | 0           |
| 0           | 0           | 0           |
| 0           | 0           | 0.000000404 |
| 0           | 0           | 0           |
| 0           | 0           | 0           |
| 0           | 0           | 0           |
| 0           | 0           | 0           |
| 0           | 0           | 0           |

|   |             |             |
|---|-------------|-------------|
| 0 | 0           | 0           |
| 0 | 0           | 0           |
| 0 | 0           | 0           |
| 0 | 0           | 0           |
| 0 | 0           | 0.00000201  |
| 0 | 0           | 0.00000248  |
| 0 | 0           | 0.00000513  |
| 0 | 0           | 0           |
| 0 | 0           | 0.00000228  |
| 0 | 0           | 0           |
| 0 | 0           | 0           |
| 0 | 0           | 0.00000187  |
| 0 | 0           | 0           |
| 0 | 0           | 0           |
| 0 | 0           | 0           |
| 0 | 0           | 0           |
| 0 | 0           | 0           |
| 0 | 0           | 0           |
| 0 | 0           | 6.59E-08    |
| 0 | 0           | 0.0000013   |
| 0 | 0           | 0           |
| 0 | 0           | 0           |
| 0 | 0           | 0           |
| 0 | 0           | 0           |
| 0 | 0           | 0           |
| 0 | 0           | 0.00000238  |
| 0 | 0           | 0           |
| 0 | 0           | 0           |
| 0 | 0           | 0.00000156  |
| 0 | 0           | 0           |
| 0 | 0           | 0.0000182   |
| 0 | 0           | 8.04E-08    |
| 0 | 0           | 3.91E-08    |
| 0 | 0           | 0           |
| 0 | 0           | 0.00000335  |
| 0 | 0.000000151 | 0           |
| 0 | 0           | 0.000000566 |
| 0 | 0           | 0           |
| 0 | 0           | 0           |
| 0 | 0           | 0.000000858 |
| 0 | 0           | 7.83E-08    |
| 0 | 0           | 0.0000188   |
| 0 | 0           | 0           |
| 0 | 0           | 0           |
| 0 | 0           | 0           |
| 0 | 0           | 0.000000203 |
| 0 | 0           | 0           |

|            |             |             |
|------------|-------------|-------------|
| 0          | 0           | 0           |
| 0          | 0           | 0           |
| 0          | 0           | 0           |
| 0          | 0           | 0.000000266 |
| 0          | 0           | 0           |
| 0          | 0           | 0           |
| 0          | 0           | 0           |
| 0          | 0           | 0           |
| 0          | 0           | 0           |
| 0          | 0           | 0           |
| 0          | 0           | 0.00000474  |
| 0          | 0           | 0           |
| 0          | 0           | 0           |
| 0          | 0           | 0.00000597  |
| 0          | 0           | 0.0000233   |
| 0          | 0           | 0           |
| 0          | 0           | 0           |
| 0          | 0           | 0.00000997  |
| 0          | 0           | 0.00000652  |
| 0          | 0           | 0           |
| 0          | 0           | 0           |
| 0          | 0           | 0           |
| 0          | 0           | 0           |
| 0          | 0           | 0           |
| 0          | 0           | 0           |
| 0          | 0           | 0           |
| 0          | 0           | 0           |
| 0          | 0           | 0           |
| 0          | 0           | 0           |
| 0          | 0           | 0.000000666 |
| 0          | 0           | 0           |
| 0          | 0           | 0           |
| 0          | 0           | 0           |
| 0          | 0           | 0           |
| 0          | 0           | 0           |
| 0          | 0           | 0           |
| 0          | 0           | 0.00000244  |
| 0          | 0           | 0.00000265  |
| 0          | 0           | 0.0000056   |
| 0          | 0           | 0.00000228  |
| 0          | 0           | 0           |
| 0          | 0           | 0           |
| 0.00000571 | 0.000000675 | 0           |
| 0          | 0           | 0           |
| 0          | 0           | 0.000000598 |
| 0          | 0           | 0           |
| 0          | 0           | 0           |



|           |            |             |
|-----------|------------|-------------|
| 0         | 0          | 0.00000366  |
| 0         | 0          | 0           |
| 0         | 0          | 0           |
| 0         | 0          | 0           |
| 0         | 0          | 0           |
| 0         | 0          | 0.00000121  |
| 0         | 0.00000104 | 0           |
| 0         | 0          | 0           |
| 0         | 0          | 0           |
| 0         | 0          | 0           |
| 0         | 0          | 0           |
| 0         | 0          | 0.000000487 |
| 0         | 0          | 0           |
| 0         | 0          | 0           |
| 0         | 0          | 0.000000749 |
| 0         | 0          | 0           |
| 0         | 0          | 0.00000165  |
| 0         | 0          | 0           |
| 0         | 0          | 0.00000167  |
| 0         | 0          | 4.97E-08    |
| 0         | 0          | 5.19E-08    |
| 0         | 0          | 0           |
| 0         | 0          | 0           |
| 0         | 0          | 0.00000017  |
| 0         | 0          | 0           |
| 0         | 0          | 0           |
| 0         | 0          | 0           |
| 0         | 0          | 5.02E-08    |
| 0         | 0          | 0           |
| 0         | 0          | 0.000000125 |
| 0         | 0.0000001  | 0           |
| 0         | 0          | 0           |
| 0         | 0          | 0           |
| 0         | 0          | 4.78E-08    |
| 0         | 0          | 0.0000242   |
| 0         | 0          | 0           |
| 0.0000032 | 0          | 0           |
| 5.07E-08  | 0          | 0           |
| 0         | 0          | 0           |
| 0         | 0          | 0           |
| 0         | 0          | 0.00000104  |
| 0         | 0          | 0           |
| 0         | 0          | 0.000000145 |
| 0         | 0          | 0.000000917 |
| 0         | 0          | 0           |
| 0         | 0          | 0           |
| 0         | 0          | 0           |

|            |            |             |
|------------|------------|-------------|
| 0          | 0          | 0           |
| 0.00000307 | 0          | 0           |
| 0.00000115 | 0.00000402 | 0           |
| 0          | 0          | 0.000000192 |
| 0          | 0          | 0           |
| 0          | 0          | 0           |
| 0          | 0          | 0           |
| 0          | 0          | 0           |
| 0          | 0          | 0           |
| 0          | 0          | 0           |
| 0          | 0          | 0           |
| 0          | 0          | 0.00000561  |
| 0          | 0          | 0           |
| 0          | 0          | 0           |
| 0          | 0          | 0           |
| 0          | 0          | 0           |
| 0          | 0          | 0.00000309  |
| 0          | 0          | 0           |
| 0          | 0          | 0           |
| 0          | 0          | 0           |
| 0          | 0          | 0           |
| 0          | 0          | 0           |
| 0          | 0          | 0           |
| 0          | 0          | 0           |
| 0          | 0          | 0           |
| 0          | 0          | 0           |
| 0          | 0          | 0           |
| 0          | 0          | 0           |
| 0          | 0          | 0           |
| 0          | 0          | 0           |
| 0          | 0          | 0           |
| 0          | 0          | 0           |
| 0          | 0          | 0           |
| 0          | 0          | 0.00000229  |
| 0          | 0          | 0.00000228  |
| 0          | 0          | 0           |
| 0          | 0          | 0.00000239  |
| 0          | 0          | 0.00000107  |
| 0          | 0          | 0           |
| 0          | 0          | 0           |
| 0          | 0          | 0.000000374 |
| 0          | 0          | 0           |
| 0          | 0          | 0           |

|             |             |             |
|-------------|-------------|-------------|
| 0           | 0.00000202  | 0           |
| 3.46E-08    | 0           | 0           |
| 0           | 0           | 0.00000112  |
| 0           | 0           | 0.000000255 |
| 0           | 0           | 0.00000103  |
| 0           | 0           | 0           |
| 0           | 0           | 0           |
| 0           | 0           | 0           |
| 0           | 0           | 0.000000153 |
| 0           | 0           | 0           |
| 0           | 0           | 0           |
| 0           | 0.000000198 | 0           |
| 0           | 0           | 0           |
| 0.000000527 | 0.000000544 | 0           |
| 0           | 0           | 0           |
| 0           | 0           | 0           |
| 8.86E-08    | 0           | 0           |
| 8.86E-08    | 0           | 0           |
| 0           | 0           | 0           |
| 0           | 0           | 0           |
| 0           | 0           | 0           |
| 0           | 0           | 0           |
| 0           | 0           | 0           |
| 0           | 0           | 0           |
| 0           | 0           | 0           |
| 0           | 0           | 0           |
| 0           | 0           | 0           |
| 0           | 0           | 0           |
| 0           | 0           | 0           |
| 0           | 0           | 0           |
| 0           | 0           | 0           |
| 0           | 0           | 0           |
| 0           | 0           | 0           |
| 0           | 0           | 0           |
| 0           | 0           | 0           |
| 0           | 0           | 0           |
| 0           | 0           | 0           |
| 0           | 0           | 0           |
| 0           | 0           | 0           |
| 0           | 0           | 0           |
| 0           | 0           | 0           |
| 0           | 0           | 0           |
| 0           | 0           | 0           |
| 0           | 0           | 0           |
| 0           | 0           | 0           |
| 0.000000144 | 0           | 0           |
| 0           | 0           | 0           |
| 0           | 0           | 0           |
| 0           | 0           | 0           |
| 0           | 0           | 0           |
| 0           | 0           | 0           |

|           |             |             |
|-----------|-------------|-------------|
| 0         | 0           | 0           |
| 0         | 0           | 0           |
| 0         | 0.000000247 | 0           |
| 0         | 0           | 0           |
| 0         | 0           | 0.00000948  |
| 0         | 0           | 0.0000252   |
| 0         | 0           | 0           |
| 0         | 0           | 0.0000102   |
| 0         | 0           | 0.00000543  |
| 0         | 0           | 0           |
| 0         | 0           | 0.000000138 |
| 0         | 0           | 0           |
| 0         | 0           | 0.000000225 |
| 0         | 0           | 0           |
| 0         | 0           | 0.000000679 |
| 0         | 0           | 0.000000052 |
| 0         | 0           | 0           |
| 0         | 0           | 0           |
| 0         | 0           | 0.000014    |
| 0         | 0           | 0.00000151  |
| 0         | 0           | 0.000000312 |
| 0         | 0           | 0           |
| 0         | 0           | 0           |
| 0         | 0           | 0           |
| 0         | 0           | 0.00000005  |
| 0         | 0           | 0           |
| 0         | 0           | 0           |
| 0         | 0           | 0.00000102  |
| 0         | 0           | 0           |
| 0         | 0           | 0           |
| 0         | 0           | 0           |
| 0         | 0           | 0.000000989 |
| 0         | 0           | 0           |
| 0         | 0           | 0           |
| 0         | 0           | 0.00000226  |
| 0         | 0           | 0.00000178  |
| 0         | 0           | 0           |
| 0         | 0           | 0.00000125  |
| 0         | 0           | 0           |
| 0.0000022 | 0.00000281  | 0           |
| 0         | 0           | 0           |
| 0         | 0           | 0           |
| 0         | 0           | 0           |
| 0         | 0           | 0           |
| 0         | 0           | 0           |

|             |             |             |
|-------------|-------------|-------------|
| 0           | 0           | 0.000000174 |
| 0           | 0           | 5.31E-08    |
| 0           | 0           | 0           |
| 0           | 0           | 5.09E-08    |
| 0           | 0           | 0           |
| 0           | 0           | 0.000000118 |
| 0           | 0.000000181 | 0           |
| 0           | 0           | 0.00000089  |
| 0           | 0           | 0           |
| 0           | 0           | 0.000000608 |
| 0           | 0           | 0.000022    |
| 0           | 0           | 0           |
| 0.00000401  | 0           | 0           |
| 0           | 0           | 0           |
| 0.000000113 | 0           | 0           |
| 0           | 0           | 0           |
| 0           | 0           | 0.000000727 |
| 0           | 0           | 0           |
| 0           | 0           | 0.000000273 |
| 0.000000693 | 0           | 0           |
| 0.000000502 | 0.00000243  | 0           |
| 0           | 0           | 0.000000249 |
| 0           | 0           | 0           |
| 0           | 0           | 0           |
| 0           | 0           | 0           |
| 0           | 0           | 0           |
| 0           | 0           | 0           |
| 0           | 0           | 0           |
| 0           | 0           | 0           |
| 0           | 0           | 0           |
| 0           | 0           | 0           |
| 0           | 0           | 0           |
| 0           | 0           | 0           |
| 0           | 0           | 0           |
| 0           | 0           | 0           |
| 0           | 0           | 7.86E-08    |
| 0           | 0           | 0.00000647  |
| 0           | 0           | 0           |
| 0           | 0           | 0           |
| 0           | 0           | 0.0000102   |
| 0           | 0           | 0.0000257   |
| 0           | 0           | 0           |
| 0           | 0           | 0.0000103   |
| 0           | 0           | 0.00000544  |
| 0           | 0           | 0           |
| 0           | 0           | 0.000000122 |
| 0           | 0           | 0           |
| 0           | 0           | 0.000000211 |
| 0           | 0           | 0           |
| 0           | 0           | 0           |
| 0           | 0           | 0           |

|            |            |            |
|------------|------------|------------|
| 0          | 0          | 0          |
| 0.00000632 | 0.00000376 | 0          |
| 0          | 0          | 0          |
| 0          | 0          | 0.00000657 |
| 0          | 0          | 4.85E-08   |
| 0          | 0          | 0          |
| 0          | 0          | 0          |
| 0          | 0          | 0.000014   |
| 0          | 0          | 0.00000135 |
| 0          | 0          | 0.00000289 |
| 0          | 0          | 0          |
| 0          | 0          | 0          |
| 0          | 0          | 0          |
| 0          | 0          | 0          |
| 0          | 0          | 4.38E-08   |
| 0          | 0          | 0          |
| 0          | 0          | 2.66E-08   |
| 0          | 0          | 0.00000971 |
| 0          | 0.00000116 | 0          |
| 0          | 0          | 0          |
| 0          | 0          | 0          |
| 0          | 0          | 0          |
| 0          | 0          | 0          |
| 0          | 0          | 0.00000999 |
| 0          | 0          | 0          |
| 0          | 0          | 0          |
| 0          | 0          | 0.00000233 |
| 0          | 0          | 0.0000017  |
| 0          | 0          | 0          |
| 0          | 0          | 0.00000143 |
| 0          | 0          | 0          |
| 0          | 0          | 0          |
| 0.00000231 | 0.00000291 | 0          |
| 0          | 0          | 0          |
| 0          | 0          | 0          |
| 0          | 0          | 7.85E-08   |
| 0          | 0          | 0          |
| 0          | 0          | 0          |
| 0          | 0          | 0          |
| 0          | 0          | 0.00000186 |
| 0          | 0          | 4.46E-08   |
| 0          | 0          | 0          |
| 0          | 0          | 5.26E-08   |
| 0          | 0          | 0          |
| 0          | 0          | 0.00000127 |
| 0          | 0.00000211 | 0          |
| 0          | 0          | 0.00000878 |

|             |             |             |
|-------------|-------------|-------------|
| 0           | 0           | 0           |
| 0           | 0           | 0.00000087  |
| 0           | 0           | 9.59E-08    |
| 0           | 0           | 0.0000234   |
| 0           | 0           | 0           |
| 0.000000221 | 0.000000137 | 0           |
| 0.00000431  | 0           | 0           |
| 0           | 0           | 0           |
| 0           | 0           | 0           |
| 0           | 0           | 0.000000923 |
| 0           | 0           | 0           |
| 0           | 0           | 0.000000312 |
| 0.00000069  | 0           | 0           |
| 0.000000471 | 0.000000267 | 0           |
| 0           | 0           | 0.000000243 |
| 0           | 0           | 0           |
| 0           | 0           | 0           |
| 0           | 0           | 0           |
| 0           | 0           | 0           |
| 0           | 0           | 0           |
| 0           | 0           | 0.000000375 |
| 0           | 0           | 0           |
| 0           | 0           | 0           |
| 0           | 0           | 0           |
| 0           | 0           | 9.47E-08    |
| 0           | 0           | 9.04E-09    |
| 0           | 0           | 0.00000639  |
| 0           | 0           | 0           |
| 0           | 0           | 0           |
| 0           | 0           | 0           |
| 0           | 0           | 0           |
| 0           | 0           | 0           |
| 0           | 0           | 0           |
| 0           | 0           | 0.000000754 |
| 0           | 0           | 0           |
| 0           | 0           | 0           |
| 0           | 0           | 0           |
| 0           | 0           | 0           |
| 0           | 0           | 0           |
| 0           | 0           | 0.00000304  |
| 0           | 0           | 0           |
| 0           | 0           | 0           |
| 0           | 0.00000138  | 0           |
| 0           | 0           | 0.000000762 |
| 0           | 0           | 0           |
| 0           | 0           | 0.00000839  |
| 0           | 0           | 0           |

|             |             |             |
|-------------|-------------|-------------|
| 0           | 0           | 0           |
| 0           | 0           | 0           |
| 0           | 0.000000116 | 0           |
| 0           | 0           | 0.0000258   |
| 0.000000204 | 8.39E-08    | 0           |
| 9.11E-08    | 0           | 0           |
| 0           | 0           | 0           |
| 0           | 0           | 0           |
| 0           | 0           | 0           |
| 0           | 0           | 0           |
| 0           | 0           | 0.000000734 |
| 0           | 0           | 0           |
| 0           | 0           | 0           |
| 0           | 0           | 0           |
| 0           | 0           | 0           |
| 0           | 0           | 0           |
| 0           | 0           | 0.00000301  |
| 0           | 0           | 0           |
| 0           | 0           | 0           |
| 0           | 0.00000134  | 0           |
| 0           | 0           | 0           |
| 0           | 0           | 0.000000591 |
| 0           | 0           | 0           |
| 0           | 0           | 0.00000826  |
| 0           | 0           | 0           |
| 0           | 0           | 0           |
| 0           | 0           | 0           |
| 0           | 0           | 3.15E-08    |
| 0           | 0.000000135 | 0           |
| 0           | 0           | 0.000027    |
| 0.000000195 | 8.38E-08    | 0           |
| 0.00000108  | 9.72E-08    | 0           |
| 8.37E-08    | 0           | 0           |
| 0           | 0           | 0           |
| 0           | 0           | 0           |
| 0           | 0.000000342 | 0           |
| 0           | 0           | 0           |
| 0           | 0           | 0           |
| 0           | 0           | 0           |
| 0           | 0           | 0           |
| 0           | 0           | 0           |
| 0           | 0           | 0           |
| 0           | 0           | 0.000000421 |
| 0           | 0           | 0           |
| 0           | 0.00000149  | 0           |
| 0           | 0           | 0.000000877 |
| 0           | 0           | 0           |



|   |             |             |
|---|-------------|-------------|
| 0 | 0           | 0.000000612 |
| 0 | 0.00000014  | 0           |
| 0 | 0           | 0.000000309 |
| 0 | 0           | 0           |
| 0 | 0.000000084 | 0           |
| 0 | 0           | 0           |
| 0 | 0           | 0           |
| 0 | 0           | 0           |
| 0 | 0           | 0           |
| 0 | 0           | 0           |
| 0 | 0           | 0           |
| 0 | 0           | 0           |
| 0 | 0           | 0           |
| 0 | 0           | 0           |
| 0 | 0           | 0           |
| 0 | 0           | 0           |
| 0 | 0           | 0           |
| 0 | 0.00000172  | 0           |
| 0 | 0           | 0           |
| 0 | 0           | 0           |
| 0 | 0           | 0.00000129  |
| 0 | 0           | 0           |
| 0 | 0           | 0.000000683 |
| 0 | 0           | 0           |
| 0 | 0           | 0.000000247 |
| 0 | 0.000000123 | 0           |
| 0 | 0           | 0           |
| 0 | 0           | 0           |
| 0 | 0           | 6.01E-08    |
| 0 | 0           | 0           |
| 0 | 9.06E-08    | 0           |
| 0 | 0           | 0           |
| 0 | 0           | 0           |
| 0 | 0           | 0.000000551 |
| 0 | 0           | 0           |
| 0 | 0           | 0           |
| 0 | 0           | 0           |
| 0 | 0           | 0           |
| 0 | 0           | 0           |
| 0 | 0           | 0           |
| 0 | 0           | 0           |
| 0 | 0           | 0           |
| 0 | 0           | 0           |
| 0 | 0           | 0           |
| 0 | 0           | 0           |
| 0 | 0           | 5.58E-08    |
| 0 | 0           | 0           |
| 0 | 0           | 0.000000149 |
| 0 | 0           | 0           |
| 0 | 0           | 0           |





|           |             |             |
|-----------|-------------|-------------|
| 0         | 0           | 0.00000186  |
| 0         | 0           | 0           |
| 0         | 0           | 0           |
| 0         | 0           | 0.0000218   |
| 0         | 0           | 0           |
| 0         | 0           | 0           |
| 0         | 0           | 3.52E-08    |
| 0         | 0.000000156 | 0           |
| 0         | 0           | 0.000000654 |
| 0         | 0           | 0           |
| 0         | 0           | 0.000000821 |
| 0         | 0           | 0.000000076 |
| 0         | 0           | 0.0000254   |
| 0         | 0           | 0           |
| 0         | 0           | 0           |
| 0         | 0           | 0.000000322 |
| 0         | 0           | 0.000000263 |
| 0         | 0           | 0           |
| 0         | 0           | 0           |
| 0         | 0           | 0           |
| 0         | 0           | 0           |
| 0         | 0           | 0           |
| 0         | 0           | 0           |
| 0         | 0           | 0           |
| 0         | 0           | 0           |
| 0         | 0           | 0           |
| 0         | 0           | 0           |
| 0         | 0           | 0           |
| 0         | 0           | 0           |
| 0         | 0           | 0.00000257  |
| 0         | 0           | 0           |
| 0         | 0           | 0           |
| 0         | 0           | 0.000016    |
| 0         | 0.000000163 | 0           |
| 0         | 0           | 0           |
| 0.0000075 | 0.00000773  | 0           |
| 0         | 0           | 0           |
| 0         | 0           | 0.0000144   |
| 0         | 0           | 0           |
| 0         | 0           | 0           |
| 0         | 0           | 0           |
| 0         | 0           | 0           |
| 0         | 0           | 0.0000182   |
| 0         | 0           | 0           |
| 0         | 0.000000255 | 0           |
| 0         | 0           | 0.0000259   |
| 0         | 0           | 0           |

|            |             |             |
|------------|-------------|-------------|
| 0          | 0           | 0           |
| 0          | 0           | 0.000000142 |
| 0          | 0           | 0.00000153  |
| 0          | 0           | 0           |
| 0          | 0           | 0           |
| 0          | 0           | 0           |
| 0          | 0           | 0.0000102   |
| 0          | 0           | 0.0000257   |
| 0          | 0           | 0           |
| 0          | 0           | 0.0000103   |
| 0          | 0           | 0.00000544  |
| 0          | 0           | 0           |
| 0          | 0           | 0.000000122 |
| 0          | 0           | 0           |
| 0          | 0           | 0.000000211 |
| 0          | 0           | 0           |
| 0          | 0           | 0           |
| 0          | 0           | 0           |
| 0          | 0           | 0           |
| 0.00000632 | 0.000000376 | 0           |
| 0          | 0           | 0           |
| 0          | 0           | 0.000000657 |
| 0          | 0           | 4.85E-08    |
| 0          | 0           | 0           |
| 0          | 0           | 0           |
| 0          | 0           | 0.000014    |
| 0          | 0           | 0.00000135  |
| 0          | 0           | 0.000000289 |
| 0          | 0           | 0           |
| 0          | 0           | 0           |
| 0          | 0           | 0           |
| 0          | 0           | 0           |
| 0          | 0           | 4.38E-08    |
| 0          | 0           | 0           |
| 0          | 0           | 2.66E-08    |
| 0          | 0           | 0.000000971 |
| 0          | 0.00000116  | 0           |
| 0          | 0           | 0           |
| 0          | 0           | 0           |
| 0          | 0           | 0           |
| 0          | 0           | 0           |
| 0          | 0           | 0.000000999 |
| 0          | 0           | 0           |
| 0          | 0           | 0           |
| 0          | 0           | 0.00000233  |
| 0          | 0           | 0.0000017   |
| 0          | 0           | 0           |

|             |             |             |
|-------------|-------------|-------------|
| 0           | 0           | 0.00000143  |
| 0           | 0           | 0           |
| 0           | 0           | 0           |
| 0.00000231  | 0.00000291  | 0           |
| 0           | 0           | 0           |
| 0           | 0           | 0           |
| 0           | 0           | 7.85E-08    |
| 0           | 0           | 0           |
| 0           | 0           | 0           |
| 0           | 0           | 0           |
| 0           | 0           | 0.000000186 |
| 0           | 0           | 4.46E-08    |
| 0           | 0           | 0           |
| 0           | 0           | 5.26E-08    |
| 0           | 0           | 0           |
| 0           | 0           | 0.000000127 |
| 0           | 0.000000211 | 0           |
| 0           | 0           | 0.000000878 |
| 0           | 0           | 0           |
| 0           | 0           | 0.00000087  |
| 0           | 0           | 9.59E-08    |
| 0           | 0           | 0.0000234   |
| 0           | 0           | 0           |
| 0.000000221 | 0.000000137 | 0           |
| 0.00000431  | 0           | 0           |
| 0           | 0           | 0           |
| 0           | 0           | 0           |
| 0           | 0           | 0.000000923 |
| 0           | 0           | 0           |
| 0           | 0           | 0.000000312 |
| 0.00000069  | 0           | 0           |
| 0.000000471 | 0.00000267  | 0           |
| 0           | 0           | 0.000000243 |
| 0           | 0           | 0           |
| 0           | 0           | 0           |
| 0           | 0           | 0           |
| 0           | 0           | 0           |
| 0           | 0           | 0           |
| 0           | 0           | 0.000000375 |
| 0           | 0           | 0           |
| 0           | 0           | 0           |
| 0           | 0           | 0           |
| 0           | 0           | 9.47E-08    |
| 0           | 0           | 9.04E-09    |
| 0           | 0           | 0.00000639  |
| 0           | 0           | 0           |
| 0           | 0           | 0           |

|             |             |             |
|-------------|-------------|-------------|
| 0           | 0           | 0           |
| 0           | 0           | 0           |
| 0           | 0           | 0           |
| 0           | 0           | 0           |
| 0           | 0           | 0           |
| 0           | 0.000000274 | 0           |
| 0           | 0           | 0           |
| 0           | 0           | 0.0000243   |
| 0           | 0           | 0           |
| 0           | 0           | 0           |
| 0           | 0           | 0.0000024   |
| 0           | 0           | 0           |
| 0           | 0           | 0.00000083  |
| 0           | 0           | 0           |
| 0           | 0           | 0           |
| 0           | 0           | 0           |
| 0           | 0           | 0           |
| 0           | 0           | 0           |
| 0           | 0           | 0.0000189   |
| 0           | 0           | 0           |
| 0           | 0           | 0           |
| 0           | 0           | 0           |
| 0           | 0           | 0           |
| 0           | 0           | 0           |
| 0           | 0           | 0           |
| 0           | 0           | 0           |
| 0           | 0           | 4.52E-08    |
| 0           | 0           | 0.000000079 |
| 0           | 0           | 0.0000324   |
| 0.000000157 | 0           | 0           |
| 0           | 0           | 0           |
| 0           | 0           | 0.000000503 |
| 0           | 0           | 0.000000044 |
| 0           | 0           | 3.73E-08    |
| 0           | 0           | 0           |
| 0           | 0           | 0.000000611 |
| 0           | 0           | 0           |
| 0           | 0           | 0           |
| 0           | 0           | 0           |
| 0           | 0           | 0           |
| 0           | 0           | 0           |
| 0           | 0           | 0           |
| 0.00000073  | 0.000000563 | 0           |
| 0           | 0           | 0           |
| 0           | 0.00000147  | 0           |
| 0           | 0           | 0.000000744 |
| 0           | 0           | 0           |
| 0           | 0           | 0.00000101  |

|            |             |             |
|------------|-------------|-------------|
| 0          | 0           | 0           |
| 0          | 0           | 0           |
| 0.000023   | 0.000000134 | 0           |
| 0          | 0           | 0.00000106  |
| 0          | 0           | 0.000000172 |
| 0          | 0           | 0           |
| 0          | 0           | 0           |
| 0          | 0           | 0           |
| 0          | 0           | 0           |
| 0          | 0           | 0           |
| 0          | 0           | 0.00000827  |
| 0          | 0           | 0           |
| 0          | 0           | 0           |
| 0          | 0           | 0.0000114   |
| 0          | 0           | 0.0000065   |
| 0          | 0           | 4.39E-08    |
| 0          | 0           | 0           |
| 0          | 0           | 0.000000453 |
| 0          | 0           | 0           |
| 0          | 0           | 0           |
| 0          | 0           | 0.000000568 |
| 0          | 0           | 0           |
| 0          | 0           | 0           |
| 0          | 0           | 0           |
| 0          | 0           | 0           |
| 0          | 0           | 0           |
| 0          | 0           | 0           |
| 0          | 0           | 0.00000587  |
| 0          | 0           | 0           |
| 0          | 0           | 0.00000227  |
| 0          | 0           | 0           |
| 0          | 0           | 0           |
| 0          | 0           | 0           |
| 0.00000647 | 0.000000506 | 0           |
| 0          | 0           | 0.000000865 |
| 0          | 0           | 0           |
| 0          | 0           | 0           |
| 0          | 0           | 0           |
| 0          | 0           | 0.00000834  |
| 0          | 0           | 0.000000252 |
| 0          | 0           | 0           |
| 0          | 0           | 0           |
| 0          | 0           | 0           |
| 0          | 0           | 0.00000125  |
| 0          | 0.00000161  | 0           |
| 0          | 0           | 0           |



|             |            |             |
|-------------|------------|-------------|
| 0           | 0          | 0           |
| 0           | 0          | 0           |
| 0           | 0          | 0           |
| 0           | 0          | 0           |
| 0           | 0          | 0           |
| 0           | 0          | 0.00000231  |
| 0           | 0          | 0.000000948 |
| 0           | 0          | 0           |
| 0           | 0          | 0.000000934 |
| 0.00000221  | 0.00000275 | 0           |
| 0           | 0          | 0           |
| 0           | 0          | 0           |
| 0           | 0          | 0           |
| 0           | 0          | 5.39E-08    |
| 0           | 0          | 0           |
| 0           | 0          | 0           |
| 0           | 0          | 0.000000241 |
| 0           | 0          | 0           |
| 0           | 0          | 0           |
| 0           | 0          | 0.000000704 |
| 0           | 0          | 0           |
| 0           | 0          | 0           |
| 0           | 0          | 0.000000738 |
| 0           | 0          | 6.12E-08    |
| 0           | 0          | 0.0000234   |
| 0           | 0          | 0           |
| 0           | 0          | 0           |
| 0.0000215   | 0          | 0           |
| 0.00000294  | 0          | 0           |
| 8.58E-08    | 0          | 0           |
| 0           | 0          | 0           |
| 0           | 0          | 0.00000104  |
| 0           | 0          | 0           |
| 0           | 0          | 0.000000168 |
| 0           | 0          | 0.00000108  |
| 0           | 0          | 0           |
| 0           | 0          | 0           |
| 0           | 0          | 0           |
| 0           | 0          | 0           |
| 0           | 0          | 0.000000291 |
| 0.000000148 | 0          | 0           |
| 0.00000105  | 0.00000308 | 0           |
| 0           | 0          | 9.73E-08    |
| 0           | 0          | 0           |
| 0           | 0          | 0           |
| 0           | 0          | 0           |

|          |            |             |
|----------|------------|-------------|
| 0        | 0          | 0           |
| 0        | 0          | 0           |
| 0        | 0          | 0           |
| 0        | 0          | 4.23E-08    |
| 0        | 0          | 0.00000667  |
| 0        | 0          | 0           |
| 0        | 0          | 0           |
| 0        | 0          | 0.00000841  |
| 0        | 0          | 0           |
| 0        | 0          | 0           |
| 0        | 0          | 0.0000113   |
| 0        | 0          | 0.00000648  |
| 0        | 0          | 5.45E-08    |
| 0        | 0          | 0           |
| 0        | 0          | 0.000000436 |
| 0        | 0          | 0           |
| 0        | 0          | 0           |
| 0        | 0          | 0           |
| 0        | 0          | 0.000000561 |
| 0        | 0          | 0           |
| 0        | 0          | 0           |
| 0        | 0          | 0           |
| 0        | 0          | 0           |
| 0        | 0          | 0           |
| 0        | 0          | 0           |
| 0        | 0          | 0           |
| 0        | 0          | 0           |
| 0        | 0          | 0           |
| 0        | 0          | 0           |
| 0        | 0          | 0           |
| 0        | 0          | 0.00000589  |
| 0        | 0          | 0           |
| 0        | 0          | 0.00000226  |
| 0        | 0          | 0           |
| 0        | 0          | 0           |
| 0        | 0          | 0           |
| 0        | 0          | 0           |
| 0.000007 | 0.00000054 | 0           |
| 0        | 0          | 0.000000821 |
| 0        | 0          | 0           |
| 0        | 0          | 0           |
| 0        | 0          | 0           |
| 0        | 0          | 0.00000392  |
| 0        | 0          | 0.000000235 |
| 0        | 0          | 0           |
| 0        | 0          | 0           |
| 0        | 0          | 0           |

|            |            |             |
|------------|------------|-------------|
| 0          | 0          | 0.00000117  |
| 0          | 0.00000156 | 0           |
| 0          | 0          | 0           |
| 0          | 0          | 0           |
| 0          | 0          | 0           |
| 0          | 0          | 0           |
| 0          | 0          | 0           |
| 0          | 0          | 0           |
| 0          | 0          | 0.00000224  |
| 0          | 0          | 0.000000887 |
| 0          | 0          | 0           |
| 0          | 0          | 0.000000965 |
| 0          | 0          | 0           |
| 0          | 0          | 0           |
| 0          | 0          | 0.00000144  |
| 0          | 0          | 0           |
| 0          | 0          | 5.07E-08    |
| 0          | 0          | 0           |
| 0          | 0          | 0           |
| 0          | 0          | 0.00000024  |
| 0          | 0          | 0           |
| 0          | 0          | 0           |
| 0          | 0          | 0           |
| 0          | 0          | 0.000000639 |
| 0          | 0          | 0           |
| 0          | 0          | 0           |
| 0          | 0          | 0.000000708 |
| 0          | 0          | 4.83E-08    |
| 0          | 0          | 0.00002     |
| 0          | 0          | 0           |
| 0          | 0          | 0           |
| 0.0000203  | 0          | 0           |
| 0.00000289 | 0          | 0           |
| 6.98E-08   | 0          | 0           |
| 0          | 0          | 0           |
| 0          | 0          | 0.000000977 |
| 0          | 0          | 0           |
| 0          | 0          | 0.000000177 |
| 0          | 0          | 0.00000106  |
| 0          | 0          | 0           |
| 0          | 0          | 0           |
| 0          | 0          | 0           |
| 0          | 0          | 0           |
| 0          | 0          | 0           |
| 0          | 0          | 0.000000273 |
| 0.00000013 | 0          | 0           |
| 0.00000101 | 0.00000302 | 0           |

|             |             |             |
|-------------|-------------|-------------|
| 0           | 0           | 8.73E-08    |
| 0           | 0           | 0           |
| 0           | 0           | 0           |
| 0           | 0           | 0           |
| 0           | 0           | 0           |
| 0           | 0           | 0           |
| 0           | 0           | 0           |
| 0           | 0           | 0.00000654  |
| 0           | 0           | 0           |
| 0           | 0           | 0           |
| 0           | 4.12E-08    | 0           |
| 0           | 0           | 0           |
| 0           | 0           | 0           |
| 0           | 0           | 0           |
| 0           | 0           | 0           |
| 0           | 0           | 0           |
| 0.000000288 | 0.000000063 | 0           |
| 0           | 0           | 0           |
| 0           | 0           | 0           |
| 0           | 0           | 0           |
| 0           | 0           | 0           |
| 0           | 0.000000178 | 0           |
| 0           | 0           | 0           |
| 0           | 0           | 0           |
| 0           | 0           | 0           |
| 0           | 0           | 0.0000145   |
| 0           | 0           | 0           |
| 0           | 0           | 6.93E-08    |
| 0.000000312 | 0.000000149 | 0           |
| 0.00000127  | 0.000000123 | 0           |
| 0           | 0           | 0           |
| 0           | 0           | 0           |
| 0           | 0           | 0.00000044  |
| 0.0000062   | 0           | 0           |
| 0.000000148 | 0           | 0           |
| 0           | 0           | 0.000000943 |
| 0           | 0           | 0           |
| 0           | 0           | 0.000000636 |
| 0           | 0           | 0           |
| 0           | 0           | 0           |
| 0           | 0           | 0           |
| 0           | 0           | 0           |
| 0           | 0           | 0.0000298   |
| 0           | 0           | 0.00000142  |
| 0           | 0           | 0.000000876 |

|             |             |             |
|-------------|-------------|-------------|
| 0           | 0           | 0.0000008   |
| 0           | 0           | 0.00000092  |
| 0           | 0           | 0.000000772 |
| 0           | 0.000000238 | 0           |
| 0           | 0           | 0.00000112  |
| 0           | 0           | 0           |
| 0           | 0           | 0.000000617 |
| 0           | 0           | 0.00000252  |
| 0           | 0           | 7.52E-08    |
| 0           | 0           | 0.000000346 |
| 0           | 0           | 0           |
| 0           | 0           | 0           |
| 0           | 0           | 0.000000452 |
| 0           | 0           | 0           |
| 0           | 0           | 0           |
| 0           | 0           | 0           |
| 0           | 0           | 0           |
| 0           | 0           | 0           |
| 0           | 0           | 0.00000312  |
| 0           | 0           | 0           |
| 0           | 0           | 0           |
| 0           | 0           | 0           |
| 0           | 0           | 0           |
| 0           | 0           | 0           |
| 0           | 0.00000189  | 0           |
| 0           | 0           | 0           |
| 0           | 0           | 0.000000409 |
| 0           | 0           | 0.000000564 |
| 0           | 0           | 0           |
| 0           | 0           | 0.000000539 |
| 0           | 0           | 0           |
| 0           | 0           | 0.00000182  |
| 0           | 0           | 0           |
| 0           | 0           | 0           |
| 0           | 0           | 0.000000242 |
| 0           | 0.000000157 | 0           |
| 0           | 0           | 0           |
| 0           | 0           | 0.0000152   |
| 0.000000202 | 0.000000126 | 0           |
| 0           | 0           | 0.000000943 |
| 0.000000918 | 0           | 0           |
| 0           | 0           | 0           |
| 0           | 0           | 0           |
| 0           | 0           | 0           |
| 0           | 0           | 9.82E-08    |
| 9.32E-08    | 0           | 0           |



|            |             |             |
|------------|-------------|-------------|
| 0          | 0           | 0           |
| 0          | 0           | 0           |
| 0          | 0           | 0.00000163  |
| 0          | 0           | 0           |
| 0          | 0           | 0.00000988  |
| 0          | 0           | 0           |
| 0          | 0           | 0           |
| 0.00000209 | 0.00000259  | 0           |
| 0          | 0           | 0           |
| 0          | 0           | 0           |
| 0          | 0           | 0.0000174   |
| 0          | 0.000000126 | 0           |
| 0          | 0           | 0.0000182   |
| 0.00000289 | 0.0000164   | 0           |
| 0          | 0           | 0           |
| 0          | 0           | 0.000000872 |
| 0          | 0           | 0           |
| 0          | 0           | 0.000000141 |
| 0          | 0           | 0           |
| 0          | 0           | 0           |
| 0          | 0           | 0           |
| 0          | 0           | 0           |
| 0          | 0           | 0.0000002   |
| 0          | 0           | 0.000000342 |
| 0          | 0           | 0           |
| 0          | 0           | 0           |
| 0          | 0           | 0           |
| 0          | 0           | 0           |
| 0          | 0           | 0           |
| 0          | 0           | 0           |
| 0          | 0           | 0           |
| 0          | 0           | 0           |
| 0          | 0           | 0.00000902  |
| 0          | 0           | 0.0000231   |
| 0          | 0           | 0.0000091   |
| 0          | 0           | 0           |
| 0          | 0           | 0           |
| 0          | 0           | 0           |
| 0          | 0           | 0           |
| 0          | 0           | 0           |
| 0          | 0           | 0           |
| 0          | 0           | 0           |
| 0          | 0           | 0.000000107 |
| 0          | 0           | 0           |
| 0          | 0           | 0.000000687 |
| 0          | 0           | 0           |
| 0          | 0           | 0           |
| 0          | 0           | 0           |
| 0          | 0           | 0           |

|   |          |             |
|---|----------|-------------|
| 0 | 0        | 0           |
| 0 | 0        | 0           |
| 0 | 0        | 0           |
| 0 | 0        | 0           |
| 0 | 0        | 0           |
| 0 | 0        | 0           |
| 0 | 0        | 0           |
| 0 | 0        | 0           |
| 0 | 0        | 0           |
| 0 | 0        | 0.00000174  |
| 0 | 0        | 0.00000277  |
| 0 | 0        | 0.00000456  |
| 0 | 0        | 0           |
| 0 | 0        | 0.00000207  |
| 0 | 0        | 0.000000619 |
| 0 | 0        | 0           |
| 0 | 0        | 0           |
| 0 | 0        | 0           |
| 0 | 0        | 0           |
| 0 | 0        | 0           |
| 0 | 0        | 0           |
| 0 | 0        | 0           |
| 0 | 0        | 0           |
| 0 | 0        | 0           |
| 0 | 0        | 0           |
| 0 | 0        | 0           |
| 0 | 0        | 0.0000233   |
| 0 | 0        | 0.000000226 |
| 0 | 8.33E-08 | 0           |
| 0 | 0        | 0.0000209   |
| 0 | 0        | 0           |
| 0 | 0        | 0.000000727 |
| 0 | 0        | 0           |
| 0 | 0        | 0           |
| 0 | 0        | 0           |
| 0 | 0        | 0           |
| 0 | 0        | 0.000000311 |
| 0 | 0        | 0           |
| 0 | 0        | 0.00000111  |
| 0 | 0        | 0           |
| 0 | 0        | 0           |
| 0 | 0        | 0           |
| 0 | 0        | 0           |
| 0 | 0        | 0           |
| 0 | 0        | 0           |
| 0 | 0        | 0           |
| 0 | 0        | 0.0000218   |
| 0 | 0        | 0           |
| 0 | 0        | 0           |



|           |             |             |
|-----------|-------------|-------------|
| 0         | 0           | 0           |
| 0         | 0           | 0.000000337 |
| 0.0000065 | 0.000000533 | 0           |
| 0         | 0           | 0           |
| 0         | 0           | 0           |
| 0         | 0           | 0.000023    |
| 0         | 0           | 0           |
| 0         | 0           | 0           |
| 0         | 0           | 0           |
| 0         | 0           | 4.78E-08    |
| 0         | 0           | 0           |
| 0         | 0           | 0           |
| 0         | 0           | 0           |
| 0         | 0           | 0.000000147 |
| 0         | 0           | 0.00000252  |
| 0         | 0.00000129  | 0           |
| 0         | 0           | 0           |
| 0         | 0           | 0           |
| 0         | 0           | 0.000000914 |
| 0         | 0           | 0.00000292  |
| 0         | 0           | 0           |
| 0         | 0           | 0.0000266   |
| 0         | 0           | 0.00000035  |
| 0         | 0           | 0           |
| 0         | 0           | 0           |
| 0         | 0           | 2.12E-08    |
| 0         | 0           | 0.000000764 |
| 0         | 0           | 0           |
| 0         | 0           | 0.000000635 |
| 0         | 0           | 0.000000095 |
| 0         | 0           | 0.0000391   |
| 0         | 0           | 1.96E-08    |
| 0         | 0           | 0           |
| 0         | 0           | 0           |
| 0         | 0           | 0           |
| 0         | 0           | 0           |
| 0         | 0           | 0           |
| 0         | 0           | 0           |
| 0         | 0           | 6.18E-08    |
| 0         | 0           | 0.00000747  |
| 0         | 0           | 8.24E-08    |
| 0         | 0           | 7.52E-08    |
| 0         | 0           | 0           |
| 0         | 0           | 0           |
| 0         | 0.00000026  | 0           |
| 0         | 0           | 0           |
| 0         | 0           | 0           |



|   |   |             |
|---|---|-------------|
| 0 | 0 | 0           |
| 0 | 0 | 0           |
| 0 | 0 | 0           |
| 0 | 0 | 0           |
| 0 | 0 | 0           |
| 0 | 0 | 0.00000232  |
| 0 | 0 | 0           |
| 0 | 0 | 0.00000284  |
| 0 | 0 | 0.000000465 |
| 0 | 0 | 0.000000069 |
| 0 | 0 | 0           |
| 0 | 0 | 0           |
| 0 | 0 | 0.0000234   |
| 0 | 0 | 0.000000368 |
| 0 | 0 | 0           |
| 0 | 0 | 0           |
| 0 | 0 | 0           |
| 0 | 0 | 0           |
| 0 | 0 | 0           |
| 0 | 0 | 0.00000012  |
| 0 | 0 | 0           |
| 0 | 0 | 0           |
| 0 | 0 | 0           |
| 0 | 0 | 6.01E-08    |
| 0 | 0 | 0.0000015   |
| 0 | 0 | 0           |
| 0 | 0 | 0           |
| 0 | 0 | 0           |
| 0 | 0 | 0.0000011   |
| 0 | 0 | 0           |
| 0 | 0 | 0.0000077   |
| 0 | 0 | 0.00000191  |
| 0 | 0 | 0           |
| 0 | 0 | 0.00000219  |
| 0 | 0 | 0           |
| 0 | 0 | 0           |
| 0 | 0 | 0.00000323  |
| 0 | 0 | 7.72E-08    |
| 0 | 0 | 7.54E-08    |
| 0 | 0 | 0           |
| 0 | 0 | 0           |
| 0 | 0 | 0.0000193   |
| 0 | 0 | 0.000000184 |
| 0 | 0 | 0           |
| 0 | 0 | 0           |
| 0 | 0 | 0           |
| 0 | 0 | 0           |

|          |             |             |
|----------|-------------|-------------|
| 0        | 0.000000172 | 0           |
| 0        | 0           | 0.000000664 |
| 0        | 0           | 0           |
| 0        | 0           | 0           |
| 0        | 0           | 0.000000646 |
| 0        | 0           | 8.61E-08    |
| 0        | 0           | 0.000000227 |
| 0        | 0           | 0           |
| 0        | 0           | 0.000000858 |
| 0        | 0           | 0           |
| 0        | 0           | 0.00000018  |
| 0        | 0           | 0.00000108  |
| 0        | 0           | 0           |
| 0        | 0           | 0           |
| 0        | 0           | 0           |
| 0        | 0           | 0           |
| 0        | 0           | 0           |
| 0        | 0           | 0.000000293 |
| 0        | 0           | 0.00000028  |
| 0        | 0           | 0           |
| 0        | 0           | 0           |
| 0        | 0           | 0           |
| 0        | 0           | 0           |
| 0        | 0           | 0           |
| 0        | 0           | 0           |
| 0        | 0           | 0           |
| 0        | 0           | 0           |
| 0        | 0           | 0           |
| 0        | 0           | 0           |
| 0        | 0           | 5.65E-08    |
| 0        | 0           | 0.00000448  |
| 0        | 0           | 0           |
| 0        | 0           | 0           |
| 9.77E-08 | 0           | 0           |
| 0        | 0           | 0           |
| 0        | 0           | 0.000000367 |
| 0        | 0           | 0           |
| 0        | 0           | 0.000000589 |
| 0        | 7.98E-08    | 0           |
| 0        | 0           | 0.000000163 |
| 0        | 0           | 0           |
| 0        | 0           | 0           |
| 0        | 8.21E-08    | 0           |
| 0        | 0.000000402 | 0           |
| 0        | 0           | 0.00000712  |
| 0        | 0           | 0.0000223   |
| 0        | 0           | 0.000000952 |
| 0        | 0           | 0.000000334 |
| 0        | 0           | 0           |





|           |             |             |
|-----------|-------------|-------------|
| 0         | 0           | 0           |
| 0         | 0           | 0           |
| 0         | 0           | 0.00000321  |
| 0         | 0           | 0.00000372  |
| 0         | 0           | 0.00000767  |
| 0         | 0           | 0           |
| 0         | 0           | 0.00000286  |
| 0         | 0           | 0           |
| 0         | 0           | 0           |
| 0         | 0           | 0           |
| 0.0000077 | 0.000000681 | 0           |
| 0         | 0           | 0           |
| 0         | 0           | 0.00000104  |
| 0         | 0           | 8.61E-08    |
| 0         | 0           | 0           |
| 0         | 0           | 0           |
| 0         | 0           | 0.0000256   |
| 0         | 0           | 0.000000224 |
| 0         | 0           | 0           |
| 0         | 0           | 0           |
| 0         | 0           | 0           |
| 0         | 0           | 0           |
| 0         | 0           | 0.000000119 |
| 0         | 0           | 0           |
| 0         | 0           | 0           |
| 0         | 0           | 0           |
| 0         | 0           | 4.87E-08    |
| 0         | 0           | 0.00000131  |
| 0         | 0.00000241  | 0           |
| 0         | 0           | 0           |
| 0         | 0           | 0           |
| 0         | 0           | 0           |
| 0         | 0           | 0           |
| 0         | 0           | 0           |
| 0         | 0           | 0           |
| 0         | 0           | 0.000000774 |
| 0         | 0           | 0           |
| 0         | 0           | 0.0000114   |
| 0         | 0           | 0           |
| 0         | 0           | 0.00000212  |
| 0         | 0           | 0.00000232  |
| 0         | 0           | 0           |
| 0         | 0           | 0.000000984 |
| 0         | 0           | 0           |
| 0         | 0           | 0           |

|             |             |             |
|-------------|-------------|-------------|
| 0.00000343  | 0.00000391  | 0           |
| 0           | 0           | 0           |
| 0           | 0           | 0           |
| 0           | 0           | 0.00000187  |
| 0           | 0           | 0.000000157 |
| 0           | 0           | 5.09E-08    |
| 0           | 0           | 0           |
| 0           | 0           | 0           |
| 0           | 0           | 0           |
| 0           | 0           | 0.0000226   |
| 0           | 0           | 0.000000268 |
| 0           | 0           | 0.000000025 |
| 0           | 0           | 0           |
| 0           | 0           | 0           |
| 0           | 0           | 0.000000146 |
| 0           | 0           | 0           |
| 0           | 0           | 0.00000478  |
| 0           | 0           | 0.0000003   |
| 0           | 0.00000012  | 0           |
| 0           | 0           | 0.000000795 |
| 0           | 0           | 0           |
| 0           | 0           | 0           |
| 0           | 0           | 0.00000083  |
| 0           | 0           | 5.39E-08    |
| 0           | 0           | 0.0000394   |
| 0           | 0           | 0.000000101 |
| 0           | 0           | 0           |
| 0.000000378 | 8.81E-08    | 0           |
| 0.00000334  | 0           | 0           |
| 0           | 0           | 0           |
| 0.00000112  | 0.000000158 | 0           |
| 0           | 0           | 0           |
| 0           | 0           | 0           |
| 0           | 0           | 0           |
| 0           | 0           | 0.00000117  |
| 0           | 0           | 0           |
| 0           | 0           | 0.000000215 |
| 0           | 0           | 0.00000156  |
| 0           | 0           | 0           |
| 0           | 0           | 0           |
| 0           | 0           | 0           |
| 0           | 0           | 0           |
| 0           | 0           | 0           |
| 0           | 0           | 0           |
| 0           | 0           | 0.00000032  |
| 0.00000053  | 0           | 0           |
| 0.000000981 | 0.00000325  | 0           |



|   |             |             |
|---|-------------|-------------|
| 0 | 0           | 0.000000347 |
| 0 | 0           | 0           |
| 0 | 0           | 0           |
| 0 | 0           | 0           |
| 0 | 0           | 0           |
| 0 | 0           | 0           |
| 0 | 0           | 0           |
| 0 | 0           | 0.000000994 |
| 0 | 0           | 0           |
| 0 | 0           | 0           |
| 0 | 0           | 0           |
| 0 | 0           | 0           |
| 0 | 0           | 6.62E-08    |
| 0 | 0           | 0           |
| 0 | 0           | 0           |
| 0 | 0           | 0.000000105 |
| 0 | 0           | 0.0000075   |
| 0 | 0           | 0           |
| 0 | 0           | 0           |
| 0 | 0.00000032  | 0           |
| 0 | 0           | 0           |
| 0 | 0           | 0           |
| 0 | 0           | 0           |
| 0 | 0           | 0           |
| 0 | 0           | 0           |
| 0 | 0           | 0           |
| 0 | 0           | 0.000000581 |
| 0 | 0           | 0           |
| 0 | 0           | 0           |
| 0 | 0           | 0.000000143 |
| 0 | 0.00000149  | 0           |
| 0 | 0           | 0           |
| 0 | 0           | 0           |
| 0 | 0           | 0.000000909 |
| 0 | 0           | 0           |
| 0 | 0           | 0.00000057  |
| 0 | 0           | 0           |
| 0 | 0           | 0.000000208 |
| 0 | 0.000000137 | 0           |
| 0 | 0           | 0           |
| 0 | 0           | 0.000000452 |
| 0 | 0           | 0           |
| 0 | 0           | 0.00000014  |
| 0 | 0           | 0           |
| 0 | 5.83E-08    | 0           |
| 0 | 0           | 0           |
| 0 | 0           | 0           |

|            |             |             |
|------------|-------------|-------------|
| 0          | 0.000000371 | 0           |
| 0          | 0           | 0.00000839  |
| 0          | 0           | 0.0000246   |
| 0          | 0           | 0           |
| 0          | 0           | 0           |
| 0          | 0           | 0.0000105   |
| 0          | 0           | 0.00000597  |
| 0          | 0           | 0.000000334 |
| 0          | 0           | 0.00000233  |
| 0          | 0           | 0           |
| 0          | 0           | 2.34E-08    |
| 0          | 0           | 0.000000256 |
| 0          | 0           | 0           |
| 0          | 0           | 0           |
| 0          | 0           | 0           |
| 0          | 0           | 0           |
| 0          | 0           | 0           |
| 0          | 0           | 0           |
| 0          | 0           | 0           |
| 0          | 0           | 0.000000867 |
| 0          | 0           | 0           |
| 0          | 0           | 0           |
| 0          | 0           | 0           |
| 0          | 0           | 0           |
| 0          | 0           | 0           |
| 0          | 0           | 0           |
| 0          | 0           | 0           |
| 0          | 0           | 0           |
| 0          | 0           | 0           |
| 0          | 0           | 0           |
| 0          | 0           | 0           |
| 0          | 0           | 0           |
| 0          | 0           | 0           |
| 0          | 0           | 0.00000323  |
| 0          | 0           | 0           |
| 0          | 0           | 0.00000214  |
| 0          | 0           | 0           |
| 0          | 0           | 0           |
| 0          | 0           | 0           |
| 0.00000843 | 0.000000457 | 0           |
| 0          | 0           | 0           |
| 0          | 0           | 0.000000881 |
| 0          | 0           | 0           |
| 0          | 0           | 0           |
| 0          | 0           | 0           |
| 0          | 0           | 0.0000167   |
| 0          | 0           | 0.00000108  |
| 0          | 0           | 0.000000407 |

|             |             |             |
|-------------|-------------|-------------|
| 0           | 0           | 0           |
| 0           | 0           | 0           |
| 0           | 0           | 0           |
| 0           | 0           | 7.33E-08    |
| 0           | 0           | 0           |
| 0           | 0           | 0           |
| 0           | 0           | 0           |
| 0           | 0           | 6.34E-08    |
| 0           | 0           | 0.00000127  |
| 0           | 0.00000151  | 0           |
| 0           | 0           | 0           |
| 0           | 0           | 0           |
| 0           | 0           | 0           |
| 0           | 0           | 0.000000121 |
| 0           | 0           | 0           |
| 0           | 0           | 0           |
| 0           | 0           | 0.00000169  |
| 0           | 0           | 0           |
| 0           | 0           | 0.000000901 |
| 0           | 0           | 0           |
| 0           | 0           | 0           |
| 0.00000303  | 0.00000328  | 0           |
| 0           | 0           | 0           |
| 0           | 0           | 0           |
| 0           | 0           | 0.0000194   |
| 0           | 0           | 0.00000018  |
| 0           | 0           | 0           |
| 0           | 0           | 0           |
| 0           | 0           | 0           |
| 0           | 0           | 0.000000193 |
| 0           | 0.000000167 | 0           |
| 0           | 0           | 0.000000867 |
| 0           | 0           | 0           |
| 0           | 0           | 0           |
| 0           | 0           | 0.000000697 |
| 0           | 0           | 0.000000189 |
| 0           | 0           | 0           |
| 0           | 0           | 0           |
| 0.000000397 | 7.81E-08    | 0           |
| 0           | 0           | 0           |
| 6.86E-08    | 0           | 0           |
| 0           | 0           | 0           |
| 0           | 0           | 0           |
| 0           | 0           | 0           |
| 0           | 0           | 0           |
| 0           | 0           | 0.00000074  |
| 0           | 0           | 0           |
| 0           | 0           | 0.000000321 |

|             |             |             |
|-------------|-------------|-------------|
| 0           | 0           | 0.00000159  |
| 0           | 0           | 0           |
| 0           | 0           | 0           |
| 0           | 0           | 0           |
| 0           | 0           | 0           |
| 0           | 0           | 0.000000321 |
| 0.000000316 | 0           | 0           |
| 0.00000114  | 0.0000032   | 0           |
| 0           | 0           | 0.000000201 |
| 0           | 0           | 0           |
| 0           | 0           | 0           |
| 0           | 0           | 0           |
| 0           | 0           | 0           |
| 0           | 0           | 0           |
| 0           | 0           | 0           |
| 0           | 0           | 0           |
| 0           | 0           | 0           |
| 0           | 0           | 0           |
| 0           | 0           | 9.48E-08    |
| 0           | 0           | 0           |
| 0           | 0           | 0           |
| 0           | 0           | 0           |
| 0           | 0           | 0           |
| 0           | 0.00000032  | 0           |
| 0           | 0           | 0           |
| 0           | 0           | 0           |
| 0           | 0           | 0           |
| 0           | 0           | 0           |
| 0           | 0           | 0           |
| 0           | 0           | 0           |
| 0           | 0           | 0           |
| 0           | 0           | 0.000000581 |
| 0           | 0           | 0           |
| 0           | 0           | 0           |
| 0           | 0           | 0.000000143 |
| 0           | 0.00000149  | 0           |
| 0           | 0           | 0           |
| 0           | 0           | 0           |
| 0           | 0           | 0.000000909 |
| 0           | 0           | 0           |
| 0           | 0           | 0.00000057  |
| 0           | 0           | 0           |
| 0           | 0           | 0.000000208 |
| 0           | 0.000000137 | 0           |
| 0           | 0           | 0           |
| 0           | 0           | 0.000000452 |
| 0           | 0           | 0           |
| 0           | 0           | 0.00000014  |



|             |             |             |
|-------------|-------------|-------------|
| 0           | 0           | 0           |
| 0           | 0.0000018   | 0           |
| 0           | 0           | 0           |
| 0           | 0           | 0           |
| 0           | 0           | 0.00000141  |
| 0           | 0           | 0           |
| 0           | 0           | 0.000000713 |
| 0           | 0           | 0           |
| 0           | 0           | 0.000000275 |
| 0           | 0.000000128 | 0           |
| 0           | 0           | 0           |
| 0           | 0           | 0           |
| 0           | 0           | 7.14E-08    |
| 0           | 0           | 0           |
| 0           | 0           | 0           |
| 0           | 0           | 0           |
| 0           | 0           | 0           |
| 0           | 0           | 0.000000625 |
| 0           | 0           | 0           |
| 0.000000196 | 0.000000077 | 0           |
| 0.0000385   | 0.0000123   | 0           |
| 9.11E-08    | 0           | 0           |
| 0           | 0           | 0           |
| 0           | 0           | 0           |
| 0           | 0.00000198  | 0           |
| 0           | 0           | 0           |
| 0           | 0.00000019  | 0           |
| 0           | 0           | 0.0000153   |
| 0           | 0           | 0           |
| 0           | 0           | 0           |
| 0.000000107 | 0           | 0           |
| 0           | 0           | 0.000000344 |
| 0           | 0           | 0           |
| 0           | 0           | 0           |
| 0           | 0           | 0           |
| 0.00000272  | 0           | 0           |
| 0.00000268  | 0.000017    | 0           |
| 0           | 0           | 0           |
| 0           | 0           | 0           |
| 0           | 0           | 0           |
| 0           | 0           | 0           |
| 0.000000322 | 0.000000305 | 0           |
| 0           | 0           | 0           |
| 0           | 0           | 0           |
| 0           | 0           | 0           |
| 0           | 0           | 0.000000401 |
| 0           | 0           | 0           |

|             |             |             |
|-------------|-------------|-------------|
| 0           | 0           | 0           |
| 0           | 0           | 0           |
| 0           | 0           | 0           |
| 0           | 0           | 0           |
| 0           | 0           | 0           |
| 0           | 0           | 0           |
| 0.000000172 | 0           | 0           |
| 9.34E-08    | 0           | 0           |
| 0           | 0           | 0           |
| 0           | 0           | 0           |
| 0           | 0           | 0           |
| 0           | 0           | 0.000000543 |
| 0           | 0           | 0           |
| 0           | 0           | 0           |
| 0           | 0           | 0           |
| 0           | 0           | 0           |
| 0.000000716 | 0           | 0           |
| 0.000000417 | 0           | 0           |
| 0           | 0           | 4.99E-08    |
| 0           | 0           | 0.000000359 |
| 0           | 0           | 0           |
| 0           | 0           | 0.00000366  |
| 0           | 0           | 0           |
| 0           | 0           | 4.49E-08    |
| 0           | 0           | 0.000000604 |
| 0.00000207  | 0.00000293  | 0           |
| 0           | 0           | 0.00000192  |
| 0           | 0           | 0           |
| 0           | 0           | 0           |
| 0           | 0           | 0           |
| 0           | 0.000000411 | 0           |
| 0           | 0           | 0.000018    |
| 6.33E-08    | 0           | 0           |
| 0.0000015   | 0.00000389  | 0           |
| 0           | 0           | 0           |
| 0           | 0           | 0           |
| 0           | 0           | 0           |
| 0           | 0           | 0           |
| 0           | 0           | 0           |
| 0           | 0           | 0           |
| 0           | 0           | 0           |
| 0           | 0           | 0.00000162  |
| 0           | 0           | 0           |
| 0           | 0           | 0           |
| 0           | 0           | 0.000000399 |
| 0           | 0           | 0           |
| 0           | 0           | 0           |

|   |             |             |
|---|-------------|-------------|
| 0 | 0           | 0.000000105 |
| 0 | 0           | 0           |
| 0 | 0           | 0           |
| 0 | 0           | 0           |
| 0 | 0           | 0           |
| 0 | 0           | 0           |
| 0 | 0.000000296 | 0           |
| 0 | 0           | 0.000000179 |
| 0 | 0           | 0.000000535 |
| 0 | 0           | 0.000000292 |
| 0 | 0           | 0.000000655 |
| 0 | 0           | 0           |
| 0 | 0           | 0           |
| 0 | 0           | 0.000000375 |
| 0 | 0           | 0           |
| 0 | 0           | 0           |
| 0 | 0           | 0           |
| 0 | 0           | 0           |
| 0 | 0           | 0           |
| 0 | 0           | 0           |
| 0 | 0           | 0           |
| 0 | 0           | 0           |
| 0 | 0           | 0           |
| 0 | 0           | 0           |
| 0 | 0           | 0           |
| 0 | 0           | 0.0000113   |
| 0 | 0           | 0           |
| 0 | 0           | 0.0000299   |
| 0 | 0           | 0           |
| 0 | 0           | 0           |
| 0 | 0           | 0.000000371 |
| 0 | 0           | 0           |
| 0 | 0           | 0           |
| 0 | 0           | 0           |
| 0 | 0           | 0           |
| 0 | 0           | 0           |
| 0 | 0           | 0           |
| 0 | 0           | 0           |
| 0 | 0           | 0           |
| 0 | 0           | 0           |
| 0 | 0           | 0           |
| 0 | 0           | 0           |
| 0 | 0           | 0           |
| 0 | 0           | 0.000000552 |
| 0 | 0           | 0           |
| 0 | 0           | 0           |
| 0 | 0           | 0           |
| 0 | 0           | 0           |



|             |             |             |
|-------------|-------------|-------------|
| 0           | 0           | 0           |
| 0           | 0           | 0           |
| 0           | 0           | 0.00000188  |
| 0           | 0           | 0.00000246  |
| 0           | 0           | 0           |
| 0           | 0           | 0           |
| 0           | 0           | 0           |
| 0           | 0.000000289 | 0           |
| 9.58E-08    | 0           | 0           |
| 0           | 0           | 0.00000104  |
| 0           | 0           | 0           |
| 0           | 0           | 0           |
| 0           | 0           | 0           |
| 0           | 0           | 0           |
| 0           | 0           | 0           |
| 0           | 0.00000029  | 0           |
| 0.000000115 | 0           | 0           |
| 0           | 0           | 0           |
| 0           | 0           | 0           |
| 0           | 0           | 0           |
| 0           | 0.000000111 | 0           |
| 0           | 0           | 0           |
| 0           | 0           | 2.31E-08    |
| 0           | 0           | 0           |
| 0           | 0           | 0           |
| 0           | 0           | 0           |
| 0           | 0.000000222 | 0           |
| 0           | 0           | 0.000000333 |
| 0           | 0           | 0           |
| 0           | 0           | 0           |
| 0           | 0           | 0.0000188   |
| 0           | 0           | 0           |
| 0           | 0           | 0           |
| 0           | 0           | 0           |
| 0           | 0           | 0           |
| 0           | 0           | 0           |
| 0           | 0           | 0           |
| 0           | 0           | 0           |
| 0           | 0           | 0           |
| 0           | 0           | 0           |
| 0           | 0           | 0           |
| 0           | 0           | 0           |
| 0           | 0           | 0           |
| 0           | 0           | 0           |
| 0           | 0           | 0           |
| 0           | 0           | 3.33E-08    |
| 0           | 0           | 0.00000142  |
| 0           | 0.00000196  | 0           |
| 0           | 0           | 0           |
| 0           | 0           | 0           |
| 0           | 0           | 0           |
| 0           | 0           | 0           |
| 0           | 0           | 0.00000193  |

|             |             |             |
|-------------|-------------|-------------|
| 0           | 0           | 0           |
| 0           | 0           | 0           |
| 0           | 0           | 0.00000163  |
| 0           | 0           | 8.76E-08    |
| 0           | 0           | 6.63E-08    |
| 0           | 0           | 0           |
| 0           | 0           | 0           |
| 0           | 0           | 0           |
| 0           | 0           | 0.000000286 |
| 0           | 0           | 0           |
| 0           | 0           | 0           |
| 0           | 0           | 0.000000217 |
| 0           | 0.00000013  | 0           |
| 0           | 0           | 0.000000602 |
| 0           | 0           | 0           |
| 0           | 0           | 0           |
| 0           | 0           | 0.000000546 |
| 0           | 0           | 0.0000143   |
| 0           | 0           | 0           |
| 0.000000211 | 0.000000203 | 0           |
| 0.000000604 | 0           | 0           |
| 0           | 0           | 0.000000142 |
| 0           | 0           | 0           |
| 0           | 0           | 0           |
| 0           | 0           | 0           |
| 0           | 0           | 0           |
| 0           | 0           | 5.54E-08    |
| 0           | 0           | 0.00000764  |
| 0           | 0           | 0.00000035  |
| 0           | 0           | 0           |
| 0           | 0           | 0           |
| 0           | 0           | 0           |
| 0           | 0           | 0           |
| 0           | 0.00000166  | 0           |
| 0           | 0           | 0           |
| 0           | 0           | 0.000000218 |
| 0           | 0.000000197 | 0           |
| 0           | 0           | 0           |
| 0.000000223 | 0.00000013  | 0           |
| 0           | 0           | 4.88E-08    |
| 0           | 0           | 0           |
| 0           | 0           | 0           |
| 0           | 0           | 0.0000186   |
| 0           | 0           | 3.83E-08    |
| 0           | 0           | 0           |
| 0           | 0           | 0           |
| 0           | 0           | 0           |

|   |   |             |
|---|---|-------------|
| 0 | 0 | 0           |
| 0 | 0 | 0           |
| 0 | 0 | 0           |
| 0 | 0 | 0           |
| 0 | 0 | 0           |
| 0 | 0 | 0           |
| 0 | 0 | 0           |
| 0 | 0 | 0           |
| 0 | 0 | 0           |
| 0 | 0 | 0.000000404 |
| 0 | 0 | 0           |
| 0 | 0 | 0           |
| 0 | 0 | 0           |
| 0 | 0 | 0           |
| 0 | 0 | 0           |
| 0 | 0 | 0           |
| 0 | 0 | 0           |
| 0 | 0 | 0           |
| 0 | 0 | 0           |
| 0 | 0 | 0.00000201  |
| 0 | 0 | 0.00000248  |
| 0 | 0 | 0.00000513  |
| 0 | 0 | 0           |
| 0 | 0 | 0.00000228  |
| 0 | 0 | 0           |
| 0 | 0 | 0           |
| 0 | 0 | 0.00000187  |
| 0 | 0 | 0           |
| 0 | 0 | 0           |
| 0 | 0 | 0           |
| 0 | 0 | 0           |
| 0 | 0 | 0           |
| 0 | 0 | 0           |
| 0 | 0 | 6.59E-08    |
| 0 | 0 | 0.0000013   |
| 0 | 0 | 0           |
| 0 | 0 | 0           |
| 0 | 0 | 0           |
| 0 | 0 | 0           |
| 0 | 0 | 0           |
| 0 | 0 | 0           |
| 0 | 0 | 0.00000238  |
| 0 | 0 | 0           |
| 0 | 0 | 0           |
| 0 | 0 | 0.00000156  |
| 0 | 0 | 0           |
| 0 | 0 | 0.0000182   |
| 0 | 0 | 8.04E-08    |
| 0 | 0 | 3.91E-08    |

|          |             |             |
|----------|-------------|-------------|
| 0        | 0           | 0           |
| 0        | 0           | 0.00000335  |
| 0        | 0.000000151 | 0           |
| 0        | 0           | 0.000000566 |
| 0        | 0           | 0           |
| 0        | 0           | 0           |
| 0        | 0           | 0.000000858 |
| 0        | 0           | 7.83E-08    |
| 0        | 0           | 0.0000188   |
| 0        | 0           | 0           |
| 0        | 0           | 0           |
| 0        | 0           | 0           |
| 0        | 0           | 0.000000203 |
| 0        | 0           | 0           |
| 0        | 0           | 0           |
| 0        | 0           | 0           |
| 0        | 0           | 0           |
| 0        | 0           | 0.000000266 |
| 0        | 0           | 0           |
| 0        | 0           | 0           |
| 0        | 0           | 0           |
| 0        | 0           | 0           |
| 0        | 0           | 0           |
| 0        | 0           | 0.00000474  |
| 0        | 0           | 0           |
| 0        | 0           | 0           |
| 0        | 0           | 0           |
| 8.08E-08 | 0           | 0           |
| 0        | 0           | 0.000000267 |
| 0        | 0           | 0.000000304 |
| 0        | 0           | 0           |
| 0        | 0           | 0           |
| 0        | 0           | 0.0000319   |
| 0        | 0           | 0           |
| 0        | 0           | 0           |
| 0        | 0           | 0.0000006   |
| 0        | 0           | 0           |
| 0        | 0           | 0.000000875 |
| 0        | 0           | 0           |
| 0        | 6.38E-08    | 0           |
| 0        | 0           | 0.0000015   |
| 0        | 0           | 0           |
| 0        | 0           | 0           |
| 0        | 0           | 0           |
| 0        | 0           | 0           |
| 0        | 0           | 0.000000137 |

|             |             |             |
|-------------|-------------|-------------|
| 0           | 0           | 0           |
| 0           | 0           | 0           |
| 0           | 8.91E-08    | 0           |
| 0           | 0           | 0           |
| 0           | 0           | 0           |
| 0           | 0           | 0.000000332 |
| 0           | 0           | 0           |
| 0           | 0.000000076 | 0           |
| 0           | 0           | 0.000000164 |
| 0           | 0           | 0           |
| 0           | 0           | 0           |
| 0.00000163  | 0.0000042   | 0           |
| 0           | 0           | 0           |
| 0.000000657 | 0.000000668 | 0           |
| 0           | 0           | 0           |
| 0           | 0           | 0           |
| 0           | 0           | 0           |
| 0           | 0           | 0.000000123 |
| 0           | 0           | 0.000000408 |
| 0           | 0           | 0           |
| 0           | 0           | 0           |
| 0           | 0           | 0           |
| 0           | 0           | 0           |
| 0           | 0           | 0           |
| 0           | 0           | 0.00000257  |
| 0           | 0           | 0.00000511  |
| 0           | 0           | 0           |
| 0           | 0           | 0           |
| 0           | 0           | 0           |
| 0           | 0           | 0           |
| 0           | 0           | 0           |
| 0           | 0           | 0           |
| 0           | 0.000000293 | 0           |
| 0           | 0           | 0.000000058 |
| 0           | 0           | 0.000000058 |
| 0           | 0           | 0           |
| 0           | 0           | 0.000000755 |
| 0           | 0           | 0           |
| 0           | 8.37E-08    | 0           |
| 0           | 0           | 0           |
| 0           | 8.37E-08    | 0           |
| 8.18E-08    | 0.00000548  | 0           |
| 0.000000112 | 0           | 0           |
| 0           | 0           | 0           |
| 7.41E-08    | 0           | 0           |

|             |             |             |
|-------------|-------------|-------------|
| 0.000000339 | 0           | 0           |
| 0.00000013  | 0           | 0           |
| 0           | 0           | 0           |
| 0           | 0           | 0           |
| 0           | 0           | 0           |
| 0           | 0           | 0           |
| 0           | 0           | 0           |
| 0.000000155 | 0           | 0           |
| 0.000000357 | 0           | 0           |
| 0.000000842 | 0.00000287  | 0           |
| 0           | 0           | 0           |
| 0           | 0           | 0           |
| 0           | 0           | 0           |
| 0           | 0.000000108 | 0           |
| 0           | 0           | 0           |
| 0           | 0           | 0           |
| 0           | 0           | 0.0000189   |
| 0           | 0           | 0           |
| 0           | 0           | 0           |
| 0           | 0           | 0           |
| 0           | 0           | 0           |
| 0           | 0           | 0           |
| 0           | 0           | 0           |
| 0           | 0           | 0           |
| 0           | 0           | 4.52E-08    |
| 0           | 0           | 0.000000079 |
| 0           | 0           | 0.0000357   |
| 0.000000312 | 0.000000119 | 0           |
| 0.000000918 | 8.26E-08    | 0           |
| 0.000000136 | 0           | 0           |
| 0           | 0           | 0           |
| 0           | 0           | 0           |
| 0           | 0           | 0.000000503 |
| 0           | 0           | 0.000000044 |
| 0           | 0           | 0           |
| 0           | 0           | 0           |
| 0           | 0           | 0.000000802 |
| 0           | 0           | 0.00000333  |
| 0           | 0           | 0           |
| 0           | 0           | 0           |
| 0           | 0           | 0           |
| 0           | 0           | 7.66E-08    |
| 0           | 0           | 0           |
| 0           | 0           | 0.00000857  |
| 0           | 0           | 0           |
| 0           | 0           | 0.0000244   |

|             |             |             |
|-------------|-------------|-------------|
| 0           | 0           | 0.00000116  |
| 0           | 0           | 0           |
| 0           | 0           | 0           |
| 0           | 0           | 0           |
| 0           | 0           | 0           |
| 0           | 0           | 8.86E-08    |
| 0           | 0           | 0.000000501 |
| 0           | 0           | 0           |
| 0           | 0           | 0           |
| 0           | 0           | 0           |
| 0           | 0           | 0           |
| 0           | 0           | 0           |
| 0           | 0           | 0.00000246  |
| 0           | 0           | 0.00000252  |
| 0           | 0           | 0.00000543  |
| 0           | 0           | 0           |
| 0           | 0           | 0           |
| 0           | 0           | 0           |
| 0           | 0.000000346 | 0           |
| 0           | 0           | 0           |
| 0           | 0           | 0           |
| 0           | 0           | 0.000000621 |
| 0           | 0           | 0           |
| 0           | 0           | 0           |
| 0           | 0           | 0           |
| 0           | 0           | 0           |
| 0           | 0           | 0.00000276  |
| 0           | 0           | 0           |
| 0           | 0           | 0           |
| 0           | 0           | 0           |
| 0.00000246  | 0.00000301  | 0           |
| 0           | 0           | 0           |
| 0           | 0           | 0.000000115 |
| 0           | 0.000000128 | 0           |
| 0           | 0           | 3.67E-08    |
| 0.000000394 | 0           | 0           |
| 0.00000092  | 9.15E-08    | 0           |
| 0           | 0           | 0           |
| 0           | 0           | 0.00000013  |
| 0           | 0           | 0           |
| 0           | 0           | 0.00000125  |
| 0           | 0           | 0.000000766 |
| 0           | 0           | 0           |
| 0           | 0           | 0           |

|           |            |            |
|-----------|------------|------------|
| 0         | 0          | 0          |
| 0         | 0          | 0.00000378 |
| 0         | 0          | 0.0000239  |
| 0         | 0          | 0          |
| 0         | 0          | 0          |
| 0         | 0          | 0.0000431  |
| 0         | 0.00000158 | 0          |
| 0         | 0          | 0.000269   |
| 0         | 0          | 0          |
| 0         | 0          | 0          |
| 0         | 0          | 0          |
| 0         | 0          | 4.47E-08   |
| 0         | 0          | 0          |
| 0         | 0          | 0          |
| 0         | 0.00000291 | 0          |
| 0         | 0          | 0          |
| 0         | 0          | 0.0000121  |
| 0         | 0          | 0          |
| 0         | 0          | 0          |
| 0         | 0.00000124 | 0          |
| 0         | 0          | 0          |
| 0         | 0          | 0          |
| 0         | 0          | 0          |
| 0         | 0          | 0          |
| 0         | 0          | 0.00000078 |
| 0         | 0          | 0          |
| 0         | 0          | 0.00000386 |
| 0         | 0          | 0.0000048  |
| 0         | 0          | 0          |
| 0         | 0          | 0          |
| 0         | 0          | 0          |
| 0         | 0          | 0          |
| 0         | 0          | 0          |
| 0         | 0          | 0.0000184  |
| 0         | 0          | 0          |
| 0         | 0          | 0          |
| 0         | 0.0000013  | 0          |
| 0         | 0          | 0.00018    |
| 0         | 0          | 0          |
| 0         | 0          | 0          |
| 0         | 0          | 0.00000302 |
| 0         | 0          | 0          |
| 0         | 0          | 0          |
| 0.0000634 | 0.00000585 | 0          |



|             |             |             |
|-------------|-------------|-------------|
| 0           | 0           | 0           |
| 0           | 0           | 0           |
| 0           | 0           | 0           |
| 0           | 0           | 0           |
| 0           | 0           | 0           |
| 0           | 0           | 0.00000888  |
| 0           | 0           | 0           |
| 0           | 0           | 0           |
| 0           | 0           | 0.000000157 |
| 0           | 0.000000179 | 0           |
| 0           | 0           | 0.0000224   |
| 0.000000124 | 0           | 0           |
| 0.00000244  | 0.0000157   | 0           |
| 0           | 0           | 0           |
| 0           | 0           | 0           |
| 0           | 0           | 0           |
| 0           | 0           | 0           |
| 0           | 0           | 0           |
| 0           | 0           | 0           |
| 0           | 0           | 0           |
| 0           | 0           | 0           |
| 0           | 0           | 0.000000118 |
| 0           | 0           | 0           |
| 0           | 0           | 0           |
| 0           | 0           | 0.00000145  |
| 0           | 0           | 0           |
| 0           | 0           | 0           |
| 0           | 0           | 0           |
| 0           | 0           | 0.0000113   |
| 0.000000118 | 0           | 0           |
| 0           | 0           | 0.00000123  |
| 0           | 0           | 0           |
| 0           | 0           | 0           |
| 0           | 0           | 0           |
| 0           | 0           | 0           |
| 0           | 0           | 0           |
| 0           | 0           | 0           |
| 0           | 0           | 0           |
| 0.00000609  | 0.000000538 | 0           |
| 0           | 0           | 0           |
| 0           | 0.0000016   | 0           |
| 0           | 0           | 0.0000102   |
| 0           | 0           | 0           |
| 0           | 0           | 0           |
| 0           | 0           | 0           |

|             |          |             |
|-------------|----------|-------------|
| 0           | 0        | 5.51E-08    |
| 0           | 8.41E-08 | 0           |
| 0.0000036   | 0        | 0           |
| 0.000000134 | 0        | 0           |
| 0           | 0        | 0           |
| 0           | 0        | 0           |
| 0           | 0        | 7.74E-08    |
| 0           | 0        | 0           |
| 0           | 0        | 0           |
| 0           | 0        | 0.0000235   |
| 0           | 0        | 0           |
| 0           | 0        | 0.00000117  |
| 0           | 0        | 9.42E-08    |
| 0           | 0        | 0           |
| 0           | 0        | 0           |
| 0           | 0        | 0           |
| 0           | 0        | 0           |
| 0           | 0        | 0           |
| 0           | 0        | 0           |
| 0           | 0        | 0           |
| 0           | 0        | 0           |
| 0           | 0        | 0           |
| 0           | 0        | 0           |
| 0           | 0        | 0           |
| 0           | 0        | 0           |
| 0           | 0        | 0           |
| 0           | 0        | 0.00000232  |
| 0           | 0        | 0           |
| 0           | 0        | 0.00000284  |
| 0           | 0        | 0           |
| 0           | 0        | 0           |
| 0           | 0        | 0           |
| 0           | 0        | 0.000000465 |
| 0           | 0        | 0.000000069 |
| 0           | 0        | 0           |
| 0           | 0        | 0.0000234   |
| 0           | 0        | 0.000000368 |
| 0           | 0        | 0           |
| 0           | 0        | 0           |
| 0           | 0        | 0           |
| 0           | 0        | 0           |
| 0           | 0        | 0           |
| 0           | 0        | 0           |
| 0           | 0        | 5.21E-08    |
| 0           | 0        | 0           |
| 0           | 0        | 0           |
| 0           | 0        | 0           |
| 0           | 0        | 0           |
| 0           | 0        | 0.0000015   |

|   |            |             |
|---|------------|-------------|
| 0 | 0          | 0           |
| 0 | 0          | 0           |
| 0 | 0          | 0           |
| 0 | 0          | 0           |
| 0 | 0          | 0.000000802 |
| 0 | 0          | 0           |
| 0 | 0          | 0.0000081   |
| 0 | 0          | 0.00000167  |
| 0 | 0          | 0           |
| 0 | 0          | 0.00000219  |
| 0 | 0          | 0           |
| 0 | 0          | 0           |
| 0 | 0          | 0.00000286  |
| 0 | 0          | 7.72E-08    |
| 0 | 0          | 7.54E-08    |
| 0 | 0          | 0           |
| 0 | 0          | 0           |
| 0 | 0          | 0.0000193   |
| 0 | 0          | 0.000000184 |
| 0 | 0          | 2.05E-08    |
| 0 | 0          | 0           |
| 0 | 0          | 0           |
| 0 | 0.00000029 | 0           |
| 0 | 0          | 0.000000664 |
| 0 | 0          | 0           |
| 0 | 0          | 0.000000646 |
| 0 | 0          | 8.61E-08    |
| 0 | 0          | 0.000032    |
| 0 | 0          | 0.000000227 |
| 0 | 0          | 0           |
| 0 | 0          | 0.000000925 |
| 0 | 0          | 0           |
| 0 | 0          | 0.00000018  |
| 0 | 0          | 0.00000108  |
| 0 | 0          | 0           |
| 0 | 0          | 0           |
| 0 | 0          | 0           |
| 0 | 0          | 0           |
| 0 | 0          | 0           |
| 0 | 0          | 0           |
| 0 | 0          | 0           |
| 0 | 0          | 0.000000293 |
| 0 | 0          | 0.00000028  |
| 0 | 0          | 0           |
| 0 | 0          | 0           |
| 0 | 0          | 0           |
| 0 | 0          | 0           |
| 0 | 0          | 0           |

|             |             |             |
|-------------|-------------|-------------|
| 0           | 0           | 0           |
| 0           | 0           | 0           |
| 0           | 0           | 0           |
| 0           | 0           | 0           |
| 0           | 0           | 5.65E-08    |
| 0           | 0           | 0.00000499  |
| 0           | 0           | 0           |
| 0           | 0           | 0           |
| 0           | 0           | 0           |
| 0           | 0           | 0           |
| 0           | 0           | 0           |
| 0.0000732   | 0.0000283   | 0.0000498   |
| 0           | 0           | 0           |
| 0.000000188 | 0           | 6.45E-08    |
| 0.0000553   | 0.000440013 | 0.000177523 |
| 0.00000104  | 0.00000197  | 0.00000258  |
| 0.000604415 | 0.000727168 | 0.000577921 |
| 0           | 0.000000692 | 0           |
| 0.000000352 | 0.000000759 | 0.00000032  |
| 0           | 0           | 0           |
| 0.000000438 | 0.00000029  | 0           |
| 0.000000281 | 0.000000505 | 0.000000527 |
| 0.0000166   | 0.000000665 | 0           |
| 0.000398264 | 0.000500626 | 0.000363885 |
| 0.000000166 | 0.000000232 | 0           |
| 0.000000237 | 0.000000507 | 0.000000269 |
| 0.000000121 | 0           | 4.39E-08    |
| 0.000000121 | 0           | 4.39E-08    |
| 0.000201944 | 0.000153824 | 0.000115312 |
| 0.000000186 | 0           | 6.76E-08    |
| 0.000000186 | 0           | 6.76E-08    |
| 0           | 0           | 0           |
| 0           | 0.00000763  | 0.00000511  |
| 0.000000262 | 0.000000751 | 0.000000308 |
| 0.000245528 | 0.000242168 | 0.00022025  |
| 0           | 0           | 0           |
| 0           | 0           | 0           |
| 0.00000205  | 0.0000196   | 0.0000557   |
| 0           | 0           | 0           |
| 0.000000301 | 0.000000169 | 0           |
| 0           | 0           | 0           |
| 0.000285082 | 0.000138357 | 0.000174502 |
| 7.02E-08    | 0.000000491 | 0           |
| 0           | 0           | 0           |
| 0           | 0           | 0           |
| 0.0000431   | 0.0000419   | 0.0000665   |
| 0.0000772   | 0.0000141   | 0.0000437   |

|             |             |             |
|-------------|-------------|-------------|
| 0           | 0           | 0.000000413 |
| 0           | 0           | 0           |
| 0.00000022  | 0.000000213 | 0.000000301 |
| 0.000000103 | 0           | 4.11E-08    |
| 0.000000186 | 0           | 7.53E-08    |
| 0           | 0           | 0           |
| 0           | 0           | 0.000000324 |
| 0.000171635 | 0.00012039  | 0.000200347 |
| 0           | 0           | 0           |
| 0           | 0           | 0           |
| 0.0000903   | 0.00024661  | 0.000119363 |
| 0.0000878   | 0.000222478 | 0.000302148 |
| 0           | 0           | 0.00000212  |
| 0.00000187  | 0           | 0.000000208 |
| 0.0000901   | 0.000239598 | 0.000139403 |
| 0.000000988 | 0.000000566 | 0.000000753 |
| 0           | 0.000000362 | 0.000000161 |
| 0           | 0           | 0.0000019   |
| 0.000224423 | 0.0000683   | 0.000117553 |
| 0           | 0           | 0           |
| 0           | 0.000247479 | 0.00011448  |
| 0           | 0.000000462 | 0.000000216 |
| 0           | 0.000000462 | 0.000000216 |
| 0.000169282 | 0.000375634 | 0.000327445 |
| 0.000301917 | 0.000179237 | 0.000359728 |
| 0           | 0           | 0           |
| 0           | 0           | 0           |
| 0.00000182  | 0.00000746  | 0.00000231  |
| 0.000000584 | 0.0000025   | 0.0000027   |
| 0.000411261 | 0.000412773 | 0.000422601 |
| 0           | 0           | 0           |
| 0.000000106 | 0           | 5.31E-08    |
| 0           | 0           | 0           |
| 0           | 0           | 0           |
| 0           | 0           | 0           |
| 0.000000193 | 0.000000122 | 0           |
| 0           | 0           | 0           |
| 0           | 0.000000177 | 0           |
| 0.000174504 | 0.0000836   | 0.000261242 |
| 0           | 0           | 0           |
| 0.00000289  | 0.00000297  | 0.00000299  |
| 0           | 0.000000331 | 0.000000181 |
| 0.000000166 | 0.000000297 | 0           |
| 0           | 0           | 0           |
| 0.0000699   | 0.0000892   | 0.000129282 |
| 0           | 0           | 0           |
| 0           | 0.000000221 | 0.000000125 |

|             |             |             |
|-------------|-------------|-------------|
| 0           | 0.000000214 | 0.000000121 |
| 0.000380045 | 0.000307957 | 0.000488439 |
| 0.00055743  | 0.000424431 | 0.000689746 |
| 0           | 0           | 0           |
| 0.000000117 | 0           | 6.75E-08    |
| 0           | 0.000000291 | 0.000000168 |
| 0           | 0           | 0           |
| 0.000106943 | 0.000145922 | 0.000159558 |
| 0           | 0.000000212 | 0           |
| 0.000000134 | 0           | 7.89E-08    |
| 0.000395308 | 0.000328186 | 0.000518261 |
| 0           | 0           | 0           |
| 0.00000175  | 0.000000281 | 0.00000191  |
| 0.000000682 | 0.00000147  | 0.00000206  |
| 0           | 0           | 0           |
| 0           | 0           | 0           |
| 0           | 0           | 0           |
| 0           | 0           | 0           |
| 0.000000557 | 0.0000137   | 0.00000377  |
| 0.00000013  | 0           | 8.12E-08    |
| 0           | 0.00000023  | 0.000000145 |
| 0           | 0           | 0           |
| 0           | 0           | 0           |
| 0           | 0.00000141  | 0.00000164  |
| 0.000000129 | 0           | 8.66E-08    |
| 0.000000778 | 0.00000435  | 0.0000133   |
| 0           | 0           | 0           |
| 0           | 0           | 0           |
| 0.000182858 | 0.0000854   | 0.00024425  |
| 0           | 0           | 0           |
| 0           | 0           | 0           |
| 0           | 0           | 0           |
| 0           | 0           | 0           |
| 0           | 0           | 0           |
| 0.000000752 | 0.00000014  | 0.000000268 |
| 0.000000215 | 0           | 0           |
| 0           | 0           | 0           |
| 0.000000223 | 0           | 0.000000168 |
| 0           | 0           | 0           |
| 0.0000913   | 0.000203687 | 0.00019815  |
| 0.00047939  | 0.000343185 | 0.000689746 |
| 0.00047939  | 0.000343185 | 0.000689746 |
| 0           | 0           | 0           |
| 0           | 0           | 0.000000159 |
| 0           | 0           | 0.000000159 |
| 0.000142326 | 0.000100771 | 0.00017491  |
| 0           | 0           | 0           |

|             |             |             |
|-------------|-------------|-------------|
| 0           | 0           | 0           |
| 0           | 0           | 0           |
| 0           | 0           | 0           |
| 0           | 0           | 0           |
| 0           | 0           | 0           |
| 7.76E-08    | 0           | 0.000000064 |
| 0           | 0           | 0           |
| 0           | 0           | 0           |
| 0           | 0           | 0.000000105 |
| 0           | 0           | 0           |
| 0           | 0           | 0.00000198  |
| 0.0000228   | 0.0000236   | 0.0000145   |
| 0           | 0           | 0           |
| 0           | 0           | 0           |
| 0           | 0           | 0           |
| 0           | 0           | 0           |
| 0.000107218 | 0.0000514   | 0.000135831 |
| 0           | 0           | 0.00000284  |
| 0.000000242 | 0           | 0.0000013   |
| 0.0000571   | 0.000029    | 0.000068    |
| 0.000180269 | 0.0000974   | 0.000267584 |
| 0           | 0           | 0.00000239  |
| 0           | 0           | 0           |
| 0           | 0           | 0.00000706  |
| 0           | 0           | 0           |
| 0           | 0           | 0           |
| 0           | 0           | 0           |
| 0           | 0           | 0           |
| 0.0000991   | 0.000167714 | 0.000273696 |
| 0           | 0           | 0           |
| 0.000000525 | 0.0000137   | 0.00000284  |
| 0           | 0           | 0           |
| 0.17682     | 0.233487    | 0.439063    |
| 0           | 0           | 0           |
| 0           | 0           | 0.000000259 |
| 0.000221336 | 0.0000294   | 0.0000169   |
| 0           | 0           | 0.00000247  |
| 0.00024594  | 0.000176052 | 0.00025656  |
| 0           | 0           | 0           |
| 0           | 0           | 0.000000224 |
| 0           | 0           | 0.00000261  |
| 0.000823082 | 0.00140928  | 0.00395834  |
| 0.00000584  | 0.0000145   | 0.0000132   |
| 0           | 0           | 0.00000301  |
| 0.000000175 | 0           | 0           |
| 0.000000087 | 0           | 0.0000023   |
| 0.00010942  | 0.000236844 | 0.000253638 |

|             |             |             |
|-------------|-------------|-------------|
| 0.000251842 | 0.000115107 | 0.000374015 |
| 0           | 0           | 0.00000304  |
| 0.000000865 | 0.0000364   | 0.00002     |
| 0           | 0           | 0           |
| 0           | 0           | 0.00000291  |
| 0           | 0           | 0.00000396  |
| 0           | 0           | 0           |
| 0.00000115  | 0.0000025   | 0.00000139  |
| 0           | 0           | 0           |
| 0           | 0           | 0.00000307  |
| 0.000266831 | 0.00018886  | 0.000322301 |
| 0           | 0           | 0.00000305  |
| 0           | 0           | 0.000000204 |
| 0.0000352   | 0.000404391 | 0.000475569 |
| 0           | 0           | 0.00000288  |
| 0           | 0           | 0.000003    |
| 0           | 0           | 0           |
| 0.000246489 | 0.000388569 | 0.00055814  |
| 0.00000542  | 0.0000273   | 0.0000292   |
| 0.00000139  | 0.000000495 | 0.00000295  |
| 0           | 0           | 0.00000354  |
| 0           | 0           | 0.000000107 |
| 0.000000387 | 0           | 0.00000302  |
| 0           | 0           | 0.0000032   |
| 0           | 0           | 0.00000402  |
| 0.000000276 | 0.000000295 | 0.000000627 |
| 0.000241606 | 0.000167372 | 0.000291151 |
| 3.46E-08    | 0           | 4.32E-08    |
| 0           | 0           | 0.00000396  |
| 0           | 0           | 0           |
| 0.000274216 | 0.00000113  | 0.00000804  |
| 0.000000822 | 0.0000022   | 0.00000267  |
| 0           | 0           | 0.00000027  |
| 0           | 0           | 0.00000211  |
| 0           | 0.000000146 | 0.000000188 |
| 0           | 0           | 0           |
| 0           | 0           | 0           |
| 0.000175965 | 0.0000953   | 0.000207526 |
| 0           | 0           | 0.00000361  |
| 0           | 0           | 0.00000325  |
| 0           | 0           | 0.00000325  |
| 0           | 0           | 0.00000297  |
| 0           | 0           | 0.00000245  |
| 0           | 0           | 0.00000022  |
| 0.000000285 | 0           | 0           |
| 0.00018091  | 0.000283454 | 0.000672844 |
| 0.00000248  | 0.0000286   | 0.000104725 |



|             |             |             |
|-------------|-------------|-------------|
| 0.000000225 | 0           | 0           |
| 0           | 0           | 0.00000343  |
| 0           | 0           | 0.00000316  |
| 0.000000518 | 0.00000302  | 0.00000089  |
| 0           | 0           | 0.00000248  |
| 0           | 0           | 0.00000248  |
| 0           | 0           | 0.00000251  |
| 0           | 0           | 0.00000288  |
| 0           | 0           | 0.000000108 |
| 0           | 0           | 0.000000126 |
| 0           | 0           | 0.00000345  |
| 0           | 0           | 0           |
| 0           | 0           | 0           |
| 0           | 0           | 0.00000268  |
| 0           | 0           | 0.00000334  |
| 0           | 0           | 0.00000322  |
| 0           | 0           | 0           |
| 0           | 0           | 0.00000338  |
| 0           | 0           | 0           |
| 0.00000139  | 0.000000514 | 0.00000031  |
| 0           | 0           | 0           |
| 0.00014842  | 0.0000724   | 0.000357363 |
| 0           | 0           | 0.00000329  |
| 0.000000795 | 0.00000495  | 0.00000241  |
| 0.00027037  | 0.00000136  | 0.00000953  |
| 0           | 0           | 0.00000339  |
| 0           | 0           | 0.00000298  |
| 0           | 0           | 0.000000218 |
| 0           | 0           | 0.00000363  |
| 0           | 0           | 0.00000342  |
| 0           | 0           | 0.00000225  |
| 0           | 0           | 0.00000342  |
| 0           | 0           | 0.00000341  |
| 0           | 0           | 0.00000374  |
| 0.000595089 | 0.0894854   | 0.0159819   |
| 0           | 0           | 0.00000232  |
| 0           | 0           | 0.000000163 |
| 0           | 0           | 0.00000332  |
| 0           | 0           | 0.00000369  |
| 0           | 0           | 0.000000329 |
| 0           | 0.000000865 | 0.00000229  |
| 0.00000154  | 0.0000332   | 0.0000311   |
| 0           | 0           | 0.00000295  |
| 0           | 0           | 0           |
| 0           | 0           | 0           |
| 0           | 0.000000879 | 0.00000035  |
| 0           | 0           | 0.00000351  |

|             |             |             |
|-------------|-------------|-------------|
| 0           | 0           | 0.00000352  |
| 0           | 0           | 0.00000355  |
| 0           | 0           | 0.00000334  |
| 0           | 0           | 0.000000321 |
| 0           | 0           | 0.000000267 |
| 0           | 0           | 0           |
| 0           | 0           | 0           |
| 0.00000039  | 0           | 0           |
| 0.000000741 | 0.00000046  | 0.00000357  |
| 0.000000815 | 0.00000662  | 0.0000077   |
| 0           | 0           | 0.00000411  |
| 0           | 0           | 0.000000209 |
| 0.000144703 | 0.0000991   | 0.000186233 |
| 0           | 0           | 0.000000324 |
| 0.00000493  | 0.0000235   | 0.0000287   |
| 0.000103054 | 0.000106396 | 0.00042168  |
| 0.000103021 | 0.00010635  | 0.00042168  |
| 0           | 0           | 0.000000443 |
| 0.000000726 | 8.93E-08    | 0           |
| 0           | 0           | 0.000000175 |
| 0.000000375 | 0           | 0           |
| 0.0000468   | 0.000111454 | 0.000164791 |
| 0.00000116  | 0.00000497  | 0.00000984  |
| 0           | 0           | 0.000000303 |
| 0.000000958 | 0.00000127  | 0.00000329  |
| 0           | 0           | 0.000000787 |
| 0.00016548  | 0.000427412 | 0.000582472 |
| 0           | 0           | 0.000000594 |
| 0.00000143  | 0.000034    | 0.000036    |
| 0           | 0           | 0.000000248 |
| 0.000105745 | 0.0000211   | 0.000105008 |
| 0           | 0           | 0.000000368 |
| 0.0000016   | 0.0000134   | 0.0000179   |
| 0.000113039 | 0.000141827 | 0.000299865 |
| 0           | 0.000011    | 0.0000352   |
| 0.000000589 | 0.0000127   | 0.000022    |
| 0           | 0           | 0.00369438  |
| 0           | 0           | 0           |
| 0.000000724 | 0.0000013   | 0.00000218  |
| 0.0000712   | 0.000295679 | 0.000343255 |
| 0           | 0           | 0.000000638 |
| 0           | 0           | 0           |
| 0.0000572   | 0.0000188   | 0.00006     |
| 0           | 0           | 0.000472554 |
| 0           | 0           | 0.000000387 |
| 0           | 0           | 0.00000124  |
| 0           | 0           | 0.00000112  |

|             |             |             |
|-------------|-------------|-------------|
| 0           | 0           | 0.00000289  |
| 0           | 0           | 0.00000332  |
| 0           | 0           | 0.0000042   |
| 0           | 0           | 0.000000946 |
| 0.0000014   | 0.000000941 | 0.00000963  |
| 0.000000343 | 0           | 0           |
| 0           | 0           | 0.000000985 |
| 0           | 0           | 0.000000985 |
| 0.00000568  | 0.00000205  | 0.000129055 |
| 0           | 0           | 0.000000104 |
| 0           | 0           | 0.00000453  |
| 0           | 0           | 0.00000453  |
| 0           | 0           | 0           |
| 0.000000261 | 0.00000301  | 0.000145855 |
| 0           | 0           | 0.000000465 |
| 0           | 0           | 0.000000198 |
| 0.000000112 | 0.000000793 | 0.00000552  |
| 0.00000437  | 0.000000735 | 0.00000806  |
| 0.000156227 | 0.000427904 | 0.00061826  |
| 0           | 0           | 0           |
| 0           | 0           | 0.00000402  |
| 0.00000774  | 0.00000165  | 0.00000821  |
| 0.00000571  | 0.000000861 | 0.00000284  |
| 0           | 0           | 0.00621788  |
| 0.00000405  | 0.00000159  | 0.00000221  |
| 0           | 0           | 0           |
| 0.00011369  | 0.000415978 | 0.000573787 |
| 0           | 0.000000369 | 0.00000157  |
| 0           | 0           | 0.000000836 |
| 0           | 0.0000005   | 0.00000184  |
| 0           | 0           | 0.000000378 |
| 0           | 0           | 0.000000449 |
| 0           | 0           | 0.000000121 |
| 0.00000918  | 0.00000206  | 0.000146279 |
| 0.00000577  | 0.000003    | 0.00000638  |
| 0           | 0           | 0.00000013  |
| 0.000000553 | 0.00000126  | 0.00000248  |
| 0           | 0           | 9.67E-08    |
| 0.000000426 | 0.00000156  | 0.00000253  |
| 0           | 0           | 0.000000489 |
| 0           | 0           | 0.000000489 |
| 0           | 0           | 0.000000375 |
| 0           | 0           | 0.00732317  |
| 0           | 0           | 0.00000222  |
| 0           | 0           | 0.000467781 |
| 0           | 0           | 0.00000442  |
| 0           | 0           | 0.00000323  |

|             |             |             |
|-------------|-------------|-------------|
| 0           | 0           | 0.000000146 |
| 0           | 0           | 0           |
| 0.00000576  | 0.00000996  | 0.0000174   |
| 0           | 0           | 0.000000294 |
| 0           | 0           | 0.00000497  |
| 0           | 0           | 0.00000423  |
| 0           | 0           | 0.00000417  |
| 0           | 0           | 0.00000417  |
| 0.000238701 | 0.000240559 | 0.000549389 |
| 0           | 0           | 0.00000384  |
| 0.000130206 | 0.000453151 | 0.000605932 |
| 0           | 0           | 0.00000415  |
| 0           | 0           | 0.000000209 |
| 0           | 0           | 0.00000015  |
| 0.0000614   | 0.00000878  | 0.0000478   |
| 0.00000168  | 0.0000211   | 0.0000722   |
| 0           | 0           | 0.000000417 |
| 0.00000076  | 0           | 0.00000342  |
| 0           | 0           | 0           |
| 0           | 0           | 0.00000143  |
| 0.0000849   | 0.0000146   | 0.000135621 |
| 0.00000149  | 0.0000235   | 0.000029    |
| 0           | 0           | 0.0000266   |
| 0           | 0           | 0.00000062  |
| 0           | 0           | 0.000000441 |
| 0.00000584  | 0.00000627  | 0.0000131   |
| 0           | 0           | 0.00000437  |
| 0           | 0           | 0.00000319  |
| 0           | 0           | 0.00000368  |
| 0           | 0           | 0           |
| 0           | 0.00000166  | 0.00000509  |
| 0           | 0           | 0           |
| 0           | 0           | 0.000000467 |
| 0           | 0           | 0.00000016  |
| 0.000000429 | 0.000000735 | 0.00000215  |
| 0           | 0           | 0.000000519 |
| 0           | 0           | 0           |
| 0.000000653 | 0.000000114 | 0.00000104  |
| 0.000000501 | 0           | 0.00000216  |
| 0           | 0           | 0           |
| 0.000000307 | 0.000000287 | 0.00000194  |
| 0           | 0           | 0.000000682 |
| 0.0000936   | 0.0000153   | 0.000150418 |
| 0           | 0           | 0           |
| 0           | 0           | 0.000000483 |
| 0.0000753   | 0.0000128   | 0.000117332 |
| 0           | 0           | 0.000000368 |

|             |             |             |
|-------------|-------------|-------------|
| 0           | 0           | 0           |
| 0           | 0           | 0           |
| 0           | 0           | 0.00000221  |
| 0.00000494  | 0.0000334   | 0.000180219 |
| 0           | 0           | 0.00000644  |
| 0           | 0           | 0           |
| 0           | 0           | 0           |
| 0           | 0           | 0           |
| 0           | 0           | 0           |
| 0           | 0           | 0           |
| 0           | 0           | 0           |
| 0.0186954   | 0.035811    | 0.13257     |
| 0           | 0           | 0.00000107  |
| 0.00000867  | 0.00000884  | 0.0000146   |
| 0.00000112  | 0.0000095   | 0.000017    |
| 0           | 0           | 0           |
| 0           | 0           | 0           |
| 0           | 0           | 0.00000501  |
| 0           | 0           | 0           |
| 0           | 0           | 0.00000149  |
| 0           | 0           | 0.00000149  |
| 0.00000301  | 0.00000226  | 0.00000207  |
| 0           | 0           | 0           |
| 0.00000352  | 0           | 0           |
| 0           | 0           | 0           |
| 0.00000549  | 0.00000177  | 0.00000105  |
| 0           | 0           | 0.00000456  |
| 0           | 0           | 0           |
| 0           | 0           | 0           |
| 0           | 0           | 0           |
| 0           | 0           | 0.00000457  |
| 0           | 0           | 0           |
| 0           | 0           | 0           |
| 0           | 0           | 0           |
| 0.00000215  | 0.0000257   | 0.0000226   |
| 0.00000385  | 0.000016    | 0.0000249   |
| 0           | 0           | 0.00000415  |
| 0           | 0           | 0           |
| 0           | 0           | 0           |
| 0           | 0           | 0.00000018  |
| 0.000223173 | 0.000215386 | 0.000458701 |
| 0.00000027  | 0           | 0.00000116  |
| 8.16E-08    | 0.000000118 | 0           |
| 0           | 0           | 0           |
| 0           | 0           | 0           |
| 0           | 0           | 0           |

|             |             |             |
|-------------|-------------|-------------|
| 0.0000645   | 0.00000422  | 0.000124006 |
| 0.00000101  | 0.00000417  | 0.00000155  |
| 0.00000583  | 0.0000106   | 0.000026    |
| 0           | 0           | 0           |
| 0.000000195 | 0.00000021  | 0.00000423  |
| 0.0000037   | 0.0000327   | 0.000209617 |
| 0.0000571   | 0.0000104   | 0.000108135 |
| 0           | 0           | 0           |
| 0           | 0           | 0           |
| 0           | 0           | 0           |
| 0           | 0.00000886  | 0.0000193   |
| 0.00000437  | 0.0000164   | 0.0000542   |
| 0           | 0           | 0.000000694 |
| 0           | 0           | 0           |
| 0.00000034  | 0.00000036  | 0.00000506  |
| 8.74E-08    | 0.00000508  | 0.00000614  |
| 0.00000428  | 0.0000225   | 0.0000475   |
| 0.00000015  | 0.00000036  | 0.00000491  |
| 0.0000563   | 0.000012    | 0.000118291 |
| 0.00000115  | 0.0000115   | 0.0000564   |
| 0.000000277 | 0.0000004   | 0.00000588  |
| 0           | 0           | 0           |
| 0.000000181 | 0.00000021  | 0.00000387  |
| 0.00000151  | 0.0000178   | 0.0000268   |
| 0.000000233 | 0.000000227 | 0.00000416  |
| 0           | 0           | 0           |
| 0.00000211  | 0.0000211   | 0.0000659   |
| 0.000000489 | 0.0000104   | 0.0000107   |
| 0           | 0           | 0.000000367 |
| 0.00000149  | 0.0000175   | 0.0000277   |
| 0           | 0           | 0           |
| 0.00000238  | 0.0000476   | 0.0000586   |
| 0.000000957 | 0.00000172  | 0.00000934  |
| 0.00000176  | 0.0000095   | 0.0000461   |
| 0           | 0           | 0.00000761  |
| 0           | 0           | 0           |
| 0           | 0           | 0.00187644  |
| 0.000000277 | 0.000000311 | 0.0000057   |
| 0.000000261 | 0.000000355 | 0.00000601  |
| 0.000000508 | 0.000000226 | 0.00000221  |
| 0.000000192 | 0.000000219 | 0.000004    |
| 0.000000608 | 0.0000214   | 0.0000492   |
| 0           | 0           | 0.00000062  |
| 0.000000155 | 0.000000203 | 0.00000375  |
| 0.00000187  | 0.0000242   | 0.0000931   |
| 0           | 0           | 0.0000011   |
| 0.00000064  | 0.000000111 | 0.00000632  |

|             |             |             |
|-------------|-------------|-------------|
| 0.0000435   | 0.0000399   | 0.000233143 |
| 0.000022    | 0.0000248   | 0.0000785   |
| 0.00000238  | 0.0000277   | 0.000138075 |
| 0           | 0           | 0.00000156  |
| 0.000000179 | 0.000000134 | 0.00000448  |
| 0.000000818 | 0.0000123   | 0.0000564   |
| 0.00000119  | 0.00000174  | 0.0000138   |
| 0           | 0           | 0.000003    |
| 0.000000878 | 0.000000204 | 0.00000357  |
| 0.00000743  | 0.0000514   | 0.000309441 |
| 0           | 0           | 0.00000345  |
| 0.00000174  | 0.0000147   | 0.0000597   |
| 0           | 0           | 0           |
| 0.00000127  | 0.00000433  | 0.000018    |
| 0           | 0           | 0           |
| 0           | 0           | 0           |
| 0.0000625   | 0.0000369   | 0.000315977 |
| 0           | 0           | 0           |
| 0           | 0           | 0.00000153  |
| 0.000000185 | 0.000000211 | 0.00000531  |
| 0           | 0           | 0           |
| 0           | 0           | 0.00000127  |
| 0           | 0           | 0           |
| 0.000000471 | 0.0000103   | 0.0000362   |
| 0           | 0           | 0           |
| 0           | 0           | 0.00000111  |
| 0           | 0           | 0.00000162  |
| 0.000000797 | 0.00000616  | 0.0000162   |
| 0.000000707 | 0.000000283 | 0.0000025   |
| 0           | 0           | 0           |
| 0.000000221 | 0.000165875 | 0.0000295   |
| 0.000000621 | 0           | 0.00000834  |
| 0.000000227 | 0           | 0.00000158  |
| 0.00000293  | 0.0000249   | 0.000126199 |
| 0           | 0           | 0.00000138  |
| 0           | 0           | 0           |
| 0.000000111 | 0.00000017  | 0.0000056   |
| 0.000000111 | 0.00000017  | 0.0000056   |
| 0.00000103  | 0.0000155   | 0.0000452   |
| 0           | 0           | 0.00000173  |
| 0           | 0           | 0.00000282  |
| 0.000000522 | 0.0000062   | 0.0000261   |
| 0           | 0           | 0           |
| 0.000000234 | 0.000165435 | 0.0000304   |
| 0.000000237 | 0           | 0.00000159  |
| 0.00000436  | 0.0000253   | 0.000143615 |
| 0           | 0           | 0.00000146  |

|             |             |             |
|-------------|-------------|-------------|
| 9.58E-08    | 5.84E-08    | 0.00000234  |
| 0.000000278 | 0.000189212 | 0.0000336   |
| 0           | 0           | 0.00000141  |
| 0           | 0           | 0           |
| 0           | 0           | 0           |
| 0.000000621 | 0.00000373  | 0.0000114   |
| 0.000000249 | 0.000172099 | 0.0000305   |
| 0.000000258 | 0.000174917 | 0.0000308   |
| 0.000000051 | 0.0000128   | 0.0000322   |
| 0.000000252 | 0.000168475 | 0.00003     |
| 0.000000288 | 0.000145996 | 0.0000265   |
| 0           | 0           | 0.00000146  |
| 0.000000036 | 0.0000154   | 0.0000354   |
| 0.000000129 | 0.000000189 | 0.00000546  |
| 0.000000151 | 0.000000712 | 0.00000625  |
| 0.000000275 | 0           | 0.00000167  |
| 0.000000196 | 0.000181887 | 0.0000326   |
| 0           | 0           | 0.00000472  |
| 0           | 0           | 0.00668026  |
| 0.000000357 | 0.000000361 | 0.00000293  |
| 0.000000357 | 0.000000361 | 0.00000293  |
| 0           | 0           | 0           |
| 0           | 0           | 0           |
| 0           | 0           | 0           |
| 0.000000235 | 0.000153393 | 0.0000275   |
| 0.000000235 | 0.000153393 | 0.0000275   |
| 0           | 0           | 0.00000405  |
| 0           | 0           | 0           |
| 0.000000255 | 0.000179378 | 0.0000306   |
| 0.000000525 | 0.0000137   | 0.0000367   |
| 0           | 0           | 0           |
| 0           | 0           | 0.00000398  |
| 0           | 0           | 0.00000398  |
| 0           | 0           | 0.0000044   |
| 2.72E-08    | 6.17E-08    | 0.00000102  |
| 0.000000307 | 0.000177131 | 0.00003     |
| 0           | 0           | 0.00000401  |
| 0.00000158  | 0.0000228   | 0.0000877   |
| 0           | 0           | 0           |
| 0           | 0           | 0           |
| 0.000000604 | 0.000000651 | 0.00000386  |
| 0           | 0           | 0.00000466  |
| 0           | 0           | 0.00000563  |
| 0           | 0           | 0           |
| 0           | 0           | 0.0000039   |
| 0.000000821 | 0.0000129   | 0.000036    |
| 0.0000631   | 0.0000771   | 0.000257003 |



|             |             |             |
|-------------|-------------|-------------|
| 0           | 0           | 0.00000477  |
| 0           | 0           | 0.0179281   |
| 0.000000214 | 0.000223775 | 0.0000404   |
| 0           | 0           | 0.00000507  |
| 0           | 0           | 0.00000507  |
| 0           | 0           | 0           |
| 0           | 0           | 0.00000571  |
| 0.000000227 | 0.000000417 | 0.0000032   |
| 4.62E-08    | 0.000000101 | 0.0000015   |
| 4.62E-08    | 0.000000101 | 0.0000015   |
| 0           | 0           | 0.00000661  |
| 0.00000019  | 0.000143964 | 0.0000244   |
| 0           | 0.000000313 | 0.00000451  |
| 0           | 0           | 0           |
| 0.000000259 | 0.000000395 | 0.00000305  |
| 0           | 0           | 0.00000425  |
| 0           | 0           | 0.00000143  |
| 0           | 0           | 0.00000468  |
| 0.00000189  | 0.00001     | 0.0000517   |
| 0           | 0           | 0.0000215   |
| 0.00000125  | 0.0000124   | 0.0000358   |
| 0           | 0           | 0           |
| 0           | 0           | 0.0000225   |
| 0           | 0           | 0           |
| 0           | 0           | 0           |
| 0.000000477 | 0.000000056 | 0.0000026   |
| 0.00000168  | 0.00000111  | 0.0000186   |
| 0           | 0           | 0.00000411  |
| 0.00000241  | 0.0000293   | 0.000180573 |
| 0.00000372  | 0.0000233   | 0.000162358 |
| 0.00000139  | 0.0000403   | 0.000110085 |
| 0.0000605   | 0.0000629   | 0.000771118 |
| 0           | 0           | 0.00000444  |
| 0           | 0           | 0.00000146  |
| 0.000000101 | 0           | 0.00000159  |
| 0           | 0           | 0           |
| 0           | 0           | 0.00000443  |
| 0           | 0           | 0.00000462  |
| 0           | 0           | 0.00000383  |
| 0           | 0           | 0           |
| 9.42E-08    | 0           | 0.00000163  |
| 9.42E-08    | 0           | 0.00000163  |
| 0           | 0           | 0           |
| 0           | 0           | 0.00000562  |
| 0           | 0           | 0.00000435  |
| 0           | 0           | 0.0000225   |
| 0.00000262  | 0.0000349   | 0.000224558 |

|             |             |             |
|-------------|-------------|-------------|
| 0.00000243  | 0.0000168   | 0.0000649   |
| 0           | 0.00000015  | 0.00000024  |
| 0.00000224  | 0.000015    | 0.000099    |
| 0           | 0           | 0.00000467  |
| 0           | 0           | 0           |
| 0           | 0           | 0           |
| 0.000000226 | 0.000000312 | 0.00000226  |
| 0           | 0           | 0           |
| 0           | 0           | 0.000028    |
| 0.000000202 | 0           | 0.00000136  |
| 0.00000256  | 0.0000307   | 0.000206441 |
| 0           | 0           | 0           |
| 0           | 0           | 0.0000246   |
| 0           | 0           | 0           |
| 0           | 0           | 0.000026    |
| 0           | 0           | 0.0000245   |
| 0           | 0           | 0.00000484  |
| 0.0000206   | 0.0000201   | 0.000219509 |
| 0           | 0           | 0.0000323   |
| 0           | 0           | 0           |
| 0           | 0           | 0           |
| 0.00000837  | 0.0000157   | 0.000219509 |
| 0.00000837  | 0.0000157   | 0.000219509 |
| 0           | 0           | 0           |
| 0.00000303  | 0.0000167   | 0.000147742 |
| 0           | 0           | 0           |
| 0           | 0           | 0           |
| 0.000000325 | 0.000000398 | 0.00000239  |
| 0           | 0           | 0.0000269   |
| 0.000000284 | 0.000000356 | 0.00000265  |
| 0           | 0           | 0.0000241   |
| 0           | 0           | 0.00000582  |
| 0           | 0.000000123 | 0.00000443  |
| 0           | 0           | 0.0000255   |
| 0.00000166  | 0.0000134   | 0.0000959   |
| 0.000000116 | 0           | 0.000000916 |
| 0           | 0           | 0.0000224   |
| 0           | 0           | 0.0000257   |
| 0           | 0           | 0.00000243  |
| 0.000000267 | 0.000000349 | 0.00000265  |
| 0           | 0           | 0.0000241   |
| 0.00000287  | 0.00000258  | 0.000023    |
| 0.00000135  | 0.0000122   | 0.0000952   |
| 0.00000133  | 0.0000122   | 0.0000952   |
| 0.000000142 | 0.0000033   | 0.0000169   |
| 0.000179855 | 0.000251062 | 0.0019316   |
| 0           | 0           | 0.0000243   |

|             |             |             |
|-------------|-------------|-------------|
| 0           | 0           | 0.0000243   |
| 0.000000355 | 0.000000348 | 0.00000387  |
| 0.000000319 | 0.000000349 | 0.00000364  |
| 0.000000963 | 0.0000142   | 0.0000334   |
| 0.000000284 | 0.000000392 | 0.00000311  |
| 0.000000284 | 0.000000392 | 0.00000311  |
| 0           | 0           | 0           |
| 0           | 0           | 0.0000274   |
| 0.000000123 | 0           | 0.00000114  |
| 0           | 0           | 0.0000255   |
| 0           | 0           | 0.000022    |
| 0           | 0           | 0.0000013   |
| 0.000000101 | 0           | 0.000000837 |
| 0.000000101 | 0           | 0.000000837 |
| 0.000000455 | 0.000000225 | 0.00000287  |
| 0.000159237 | 0           | 0.00122486  |
| 0           | 0           | 0.0000257   |
| 0.000000166 | 0           | 0.00000125  |
| 0           | 0.00000279  | 0.00000208  |
| 0           | 0           | 0.00000122  |
| 0           | 0           | 0.00000122  |
| 0.000000298 | 0.000000291 | 0.00000258  |
| 0.00000041  | 0.000000444 | 0.00000388  |
| 0           | 0           | 0.00000446  |
| 0.000000241 | 0           | 0.00000152  |
| 0.000000212 | 0           | 0.00000154  |
| 0.000000199 | 0.000000272 | 0.00000234  |
| 0.000000253 | 0           | 0.00000165  |
| 0.000000134 | 0.000000863 | 0.00000958  |
| 0.000000363 | 0.000000351 | 0.00000307  |
| 0.000000334 | 0.0000322   | 0.000206985 |
| 0.000000334 | 0.0000322   | 0.000206985 |
| 7.59E-08    | 0           | 0.00000128  |
| 0.000000243 | 0.00003     | 0.000201565 |
| 0           | 0           | 0.00000443  |
| 0           | 8.43E-08    | 0.00000428  |
| 0           | 0           | 0.0000191   |
| 0.000000287 | 0.000000282 | 0.00000243  |
| 0.000000104 | 0.000000158 | 0.00000114  |
| 0.000000325 | 0.000000352 | 0.00000363  |
| 0.000000235 | 0           | 0.00000157  |
| 0.000000165 | 0           | 0.00000126  |
| 0.000000039 | 0.000000301 | 0.00000261  |
| 0.000000021 | 0           | 0.00000137  |
| 0           | 0           | 0.00000408  |
| 0           | 0           | 0.0000235   |
| 0.000000226 | 0           | 0.00000152  |

|             |             |             |
|-------------|-------------|-------------|
| 0.00000248  | 0           | 0.0000132   |
| 0           | 0           | 0.0000206   |
| 0.00000218  | 0.0000154   | 0.000100875 |
| 0           | 8.92E-08    | 0.0000055   |
| 0.00000118  | 0.0000316   | 0.000172771 |
| 0           | 0           | 0.00000144  |
| 0.000000332 | 0.000000411 | 0.00000266  |
| 0.000000276 | 0.000000313 | 0.00000312  |
| 0           | 0           | 0.0784451   |
| 0.00000281  | 0.0000121   | 0.000190159 |
| 0.000000174 | 0.00000031  | 0.00000235  |
| 0           | 6.27E-08    | 0.00000453  |
| 0.000000818 | 0.00000624  | 0.0000453   |
| 0.000000222 | 0           | 0.0000012   |
| 0.000000419 | 0.00000102  | 0.0000525   |
| 0.000000224 | 0.00000018  | 0.00000212  |
| 0.00000021  | 0.000000167 | 0.000002    |
| 0.0000188   | 0.0000046   | 0.000115493 |
| 0.00000262  | 0.0000221   | 0.000227645 |
| 0.000000204 | 0.000000163 | 0.00000197  |
| 0.000000192 | 0.000000665 | 0.0000125   |
| 0           | 0.00000198  | 0.0000479   |
| 0           | 0           | 0.000000714 |
| 0.000000149 | 0.000000518 | 0.00000986  |
| 0           | 0           | 0           |
| 0.00000281  | 0.0000112   | 0.000183472 |
| 0.000000198 | 0.0000003   | 0.00000295  |
| 0.00000209  | 0.0000215   | 0.000170648 |
| 0.000000238 | 0.000000274 | 0.00000252  |
| 0.000000505 | 0.00000189  | 0.0000176   |
| 3.51E-08    | 0           | 0.0000035   |
| 0.000000832 | 0.0000174   | 0.000288448 |
| 0.000000201 | 0.000000236 | 0.00000281  |
| 0           | 0.000000291 | 0.0000331   |
| 0           | 0           | 0.0305147   |
| 0           | 0           | 0.0000077   |
| 0           | 0           | 0.00000477  |
| 0.000000213 | 0           | 0.00000205  |
| 0.00000128  | 0.0000207   | 0.000183684 |
| 0.00000662  | 0.00000437  | 0.000160146 |
| 0.000000224 | 0.000000197 | 0.00000198  |
| 0           | 0           | 0.000033    |
| 0.000000716 | 0.000000358 | 0.0000142   |
| 0           | 0           | 0.00000607  |
| 0           | 0           | 0.0000649   |
| 0           | 0           | 0.0000817   |
| 0.00000117  | 0.000018    | 0.000216972 |

|             |             |             |
|-------------|-------------|-------------|
| 0.00000138  | 0.0000199   | 0.000194513 |
| 0           | 0           | 0.0000701   |
| 0           | 0           | 0.0000826   |
| 0           | 0           | 0.0000669   |
| 0           | 0           | 0.0000861   |
| 0.00000123  | 0.0000204   | 0.000197537 |
| 0           | 0           | 0.0000542   |
| 0           | 0           | 0.0000758   |
| 0.000000168 | 0.000000286 | 0.00000281  |
| 0           | 0           | 0.0000424   |
| 0.00000015  | 0.000000253 | 0.0000022   |
| 0.000000344 | 0           | 0.00000432  |
| 0           | 0           | 0.0000401   |
| 0           | 0           | 0.00000386  |
| 0           | 0           | 0.0000854   |
| 0           | 0           | 0.0000608   |
| 0           | 0           | 0.0000675   |
| 0           | 0           | 0.0000781   |
| 9.32E-08    | 0           | 0.00000105  |
| 0           | 0           | 0.0000536   |
| 0           | 0           | 0.0000715   |
| 0           | 0           | 0.0000557   |
| 0           | 0           | 0           |
| 0           | 0           | 0.00000863  |
| 0           | 0           | 0.0000355   |
| 0           | 0           | 0.0000658   |
| 0           | 0           | 0.0000624   |
| 0           | 0           | 0.0000973   |
| 0.00000205  | 0           | 0.000160144 |
| 0           | 0           | 0.0000808   |
| 0           | 0           | 0.0000618   |
| 0           | 0           | 0.000114283 |
| 0           | 0           | 0.000114283 |
| 0           | 0           | 0.00008     |
| 0           | 0           | 0.0000698   |
| 0           | 0           | 0.0000812   |
| 0           | 0           | 0.0000608   |
| 0           | 0           | 0.0000608   |
| 0           | 0           | 0.0000643   |
| 0           | 0           | 0.00000755  |
| 0           | 0           | 0.0000561   |
| 0           | 0           | 0.0000552   |
| 0           | 0           | 0.0000436   |
| 0           | 0           | 0.0000434   |
| 0           | 0           | 0.0000434   |
| 0           | 0           | 0.0000812   |
| 0           | 0           | 0.0000512   |

|             |            |             |
|-------------|------------|-------------|
| 0           | 0          | 0.0000748   |
| 0           | 0          | 0.0000456   |
| 0           | 0          | 0.00000792  |
| 0           | 0          | 0.000114283 |
| 0           | 0          | 0.00000738  |
| 0           | 0          | 0.0000511   |
| 0           | 0          | 0.0000488   |
| 0           | 0          | 0.00000834  |
| 0           | 0          | 0.0000841   |
| 0           | 0          | 0.0000841   |
| 0.000000166 | 0          | 0.00000145  |
| 0           | 0          | 0.00000723  |
| 0           | 0          | 0.00000723  |
| 0           | 0          | 0.0000316   |
| 0           | 0          | 0.0000316   |
| 0           | 0          | 0.0000339   |
| 0           | 0          | 0.0000454   |
| 0           | 0          | 0.0000395   |
| 0           | 0          | 0.0000454   |
| 0           | 0          | 0.0000486   |
| 0           | 0          | 0.0000418   |
| 0           | 0          | 0.000037    |
| 0           | 0          | 0.0000338   |
| 0           | 0          | 0.0000326   |
| 0           | 0          | 0.0000603   |
| 0           | 0          | 0.0000103   |
| 0           | 0          | 0.0000483   |
| 0           | 0          | 0.00000351  |
| 0           | 0          | 0.0000101   |
| 0           | 0          | 0.0000425   |
| 0           | 0          | 0           |
| 0           | 0          | 0.00000906  |
| 0           | 0          | 0.00000926  |
| 0           | 0          | 0.0000531   |
| 0           | 0          | 0.0000531   |
| 0           | 0          | 0.0111892   |
| 0           | 0          | 0.000054    |
| 0           | 0          | 0.00000874  |
| 0           | 0          | 0.0000353   |
| 0.000000275 | 0          | 0.00000466  |
| 0           | 0          | 0.00000891  |
| 0           | 0          | 0.0000353   |
| 0.000000896 | 0          | 0.000082    |
| 0           | 0          | 0.00000872  |
| 0           | 0          | 0.0000527   |
| 0           | 0          | 0.0000527   |
| 0.00000175  | 0.00000133 | 0.0000882   |

|             |             |             |
|-------------|-------------|-------------|
| 0           | 0           | 0.0000644   |
| 0           | 0           | 0.00000821  |
| 0.000000175 | 0.000000167 | 0.0000143   |
| 0           | 0           | 0           |
| 0           | 0           | 0.00000863  |
| 0           | 0           | 0.0000552   |
| 0           | 0           | 0.0000552   |
| 0           | 0           | 0.00000829  |
| 0           | 0           | 0.00000816  |
| 0           | 0           | 0.00000844  |
| 0.000000336 | 0           | 0.0000027   |
| 0           | 0           | 0.0000293   |
| 0.000000634 | 0.000000463 | 0.0000598   |
| 0           | 0           | 0.0000529   |
| 0           | 0           | 0.00000806  |
| 0           | 0           | 0.00000702  |
| 0           | 0           | 0.00000702  |
| 0           | 0           | 0.0000197   |
| 0.000000144 | 0.000000216 | 0.00013352  |
| 0           | 0           | 0.000043    |
| 0           | 0           | 0.0000223   |
| 0.000000551 | 0.000000037 | 0.0000282   |
| 0           | 0           | 0.0000478   |
| 0           | 0           | 0           |
| 0           | 0           | 0.0000297   |
| 0.000000223 | 0.000000285 | 0.0000266   |
| 0           | 0           | 0.0000774   |
| 0.000000182 | 0.000000158 | 0.000136704 |
| 0           | 0           | 0.0000225   |
| 0           | 0.0000167   | 0.0000508   |
| 0           | 0.0000129   | 0.0000407   |
| 0           | 0.00000502  | 0.0000169   |
| 0           | 0.00555284  | 0.0178875   |
| 0           | 0.00000537  | 0.0000181   |
| 0.000000314 | 0.000000492 | 0.0000535   |
| 0           | 0.0000145   | 0.0000447   |
| 0           | 0.00000558  | 0.0000188   |
| 0.000000709 | 0.000000473 | 0.000212258 |
| 8.74E-08    | 0.00000508  | 0.000104604 |
| 0.000000283 | 0.000000338 | 0.0000329   |
| 0           | 0.00000554  | 0.0000155   |
| 0           | 0.0000151   | 0.0000475   |
| 0           | 0.0000156   | 0.0000488   |
| 0           | 0.0000156   | 0.0000488   |
| 0.00000019  | 0.000000239 | 0.0000283   |
| 0.000000146 | 0.000000441 | 0.0000542   |
| 0.000000271 | 0.000000316 | 0.0000384   |

|             |             |            |
|-------------|-------------|------------|
| 0           | 0           | 0.00000383 |
| 0.000000185 | 0           | 0.0000242  |
| 0.000000168 | 0.000000121 | 0.0000355  |



| log10_vanderbiltRatio | log10_uncRatio | averageRatio |
|-----------------------|----------------|--------------|
| 2.071209823           | 2.786766601    | 2.428988212  |
| 1.989078505           | 2.858640857    | 2.423859681  |
| 1.982061477           | 2.821268388    | 2.401664932  |
| 1.982061477           | 2.821268388    | 2.401664932  |
| 2.025233516           | 2.768201331    | 2.396717424  |
| 1.884764677           | 2.892626191    | 2.388695434  |
| 2.004157691           | 2.737938713    | 2.371048202  |
| 1.923165832           | 2.818288973    | 2.370727402  |
| 2.253885055           | 2.479384102    | 2.366634579  |
| 2.002961273           | 2.70329937     | 2.353130321  |
| 1.911072735           | 2.730766592    | 2.320919663  |
| 1.963707807           | 2.664318978    | 2.314013393  |
| 1.99406361            | 2.624145196    | 2.309104403  |
| 1.917121122           | 2.688177783    | 2.302649452  |
| 2.198576132           | 2.400125323    | 2.299350727  |
| 1.967101903           | 2.624553976    | 2.295827939  |
| 1.970315073           | 2.621072618    | 2.295693845  |
| 2.310027366           | 2.270257006    | 2.290142186  |
| 2.196029013           | 2.382791915    | 2.289410464  |
| 2.21178584            | 2.347347624    | 2.279566732  |
| 1.907173324           | 2.644099702    | 2.275636513  |
| 2.170159382           | 2.376245252    | 2.273202317  |
| 2.168096235           | 2.376218714    | 2.272157475  |
| 1.882450567           | 2.652130576    | 2.267290572  |
| 1.923927977           | 2.604127437    | 2.264027707  |
| 1.901705916           | 2.623773429    | 2.262739672  |
| 2.141096976           | 2.383274683    | 2.262185829  |
| 2.141096976           | 2.383274683    | 2.262185829  |
| 1.987283695           | 2.532992216    | 2.260137956  |
| 1.920563019           | 2.596084682    | 2.25832385   |
| 1.902150462           | 2.612691995    | 2.257421228  |
| 2.02701267            | 2.486246334    | 2.256629502  |
| 2.02701267            | 2.486246334    | 2.256629502  |
| 1.934841382           | 2.572634612    | 2.253737997  |
| 1.889802963           | 2.614596654    | 2.252199809  |
| 2.169940358           | 2.332315199    | 2.251127779  |
| 1.933311766           | 2.565796547    | 2.249554156  |
| 1.925007364           | 2.566058292    | 2.245532828  |
| 1.925007364           | 2.566058292    | 2.245532828  |
| 1.891626169           | 2.590338535    | 2.240982352  |
| 1.891626169           | 2.590338535    | 2.240982352  |
| 2.248984223           | 2.219475412    | 2.234229818  |
| 2.471385415           | 1.996620785    | 2.2340031    |
| 1.990079653           | 2.465981281    | 2.228030467  |
| 2.143618562           | 2.310677853    | 2.227148208  |
| 2.195688983           | 2.231013347    | 2.213351165  |

|             |             |             |
|-------------|-------------|-------------|
| 2.214851733 | 2.203224237 | 2.209037985 |
| 2.131573695 | 2.276454048 | 2.204013871 |
| 2.161183678 | 2.219136769 | 2.190160223 |
| 2.370745089 | 1.974830731 | 2.17278791  |
| 1.881745131 | 2.459213547 | 2.170479339 |
| 2.115483905 | 2.20952241  | 2.162503158 |
| 2.245578517 | 2.067784169 | 2.156681343 |
| 2.117200947 | 2.195562897 | 2.156381922 |
| 2.295934802 | 2.014282276 | 2.155108539 |
| 2.336081807 | 1.972633994 | 2.1543579   |
| 2.266144229 | 2.027062073 | 2.146603151 |
| 2.106130523 | 2.15537445  | 2.130752487 |
| 2.106130523 | 2.15537445  | 2.130752487 |
| 2.155964975 | 2.092776619 | 2.124370797 |
| 2.039571736 | 2.196578548 | 2.118075142 |
| 2.062585024 | 2.171488013 | 2.117036518 |
| 2.023375955 | 2.209876946 | 2.116626451 |
| 1.997738753 | 2.232763635 | 2.115251194 |
| 2.090178394 | 2.138120256 | 2.114149325 |
| 2.107416613 | 2.117723231 | 2.112569922 |
| 1.893073526 | 2.317380197 | 2.105226862 |
| 1.956555001 | 2.253022885 | 2.104788943 |
| 1.956555001 | 2.253022885 | 2.104788943 |
| 2.012776013 | 2.195362079 | 2.104069046 |
| 2.094143151 | 2.113555585 | 2.103849368 |
| 2.094143151 | 2.113555585 | 2.103849368 |
| 1.996802676 | 2.207780767 | 2.102291722 |
| 1.959268825 | 2.241801864 | 2.100535345 |
| 2.045491205 | 2.153198203 | 2.099344704 |
| 1.833739646 | 2.357086263 | 2.095412954 |
| 1.957619286 | 2.231633895 | 2.094626591 |
| 1.864952643 | 2.321701422 | 2.093327032 |
| 2.10293604  | 2.075688039 | 2.089312039 |
| 2.000947264 | 2.168576253 | 2.084761759 |
| 1.949249073 | 2.217330035 | 2.083289554 |
| 1.954411367 | 2.207399627 | 2.080905497 |
| 2.015024816 | 2.145049301 | 2.080037058 |
| 2.113908298 | 2.043585171 | 2.078746734 |
| 1.85302956  | 2.300919948 | 2.076974754 |
| 1.936526209 | 2.214532289 | 2.075529249 |
| 1.855873484 | 2.290965464 | 2.073419474 |
| 2.109940357 | 2.036447724 | 2.073194041 |
| 1.907011378 | 2.239113838 | 2.073062608 |
| 1.971532389 | 2.17339535  | 2.07246387  |
| 1.999060336 | 2.14429406  | 2.071677198 |
| 1.978252965 | 2.164001513 | 2.071127239 |
| 1.978252965 | 2.164001513 | 2.071127239 |

|             |             |             |
|-------------|-------------|-------------|
| 1.933078569 | 2.208489503 | 2.070784036 |
| 1.937973223 | 2.180300732 | 2.059136978 |
| 2.05194578  | 2.06508936  | 2.05851757  |
| 2.046140265 | 2.06823051  | 2.057185387 |
| 1.858781706 | 2.252589206 | 2.055685456 |
| 1.846274178 | 2.261704521 | 2.05398935  |
| 1.946282114 | 2.161165608 | 2.053723861 |
| 1.946282114 | 2.161165608 | 2.053723861 |
| 1.946282114 | 2.161165608 | 2.053723861 |
| 1.957211671 | 2.148240179 | 2.052725925 |
| 1.964227164 | 2.140669489 | 2.052448327 |
| 1.882854909 | 2.220032431 | 2.05144367  |
| 1.997264522 | 2.103579466 | 2.050421994 |
| 1.983210882 | 2.117002254 | 2.050106568 |
| 1.941951558 | 2.154701344 | 2.048326451 |
| 1.849190029 | 2.243778281 | 2.046484155 |
| 2.197448846 | 1.894734934 | 2.04609189  |
| 1.924642742 | 2.167062496 | 2.045852619 |
| 1.918695764 | 2.172251261 | 2.045473513 |
| 1.891823783 | 2.196655986 | 2.044239885 |
| 1.91668579  | 2.171297229 | 2.04399151  |
| 2.194980958 | 1.890264896 | 2.042622927 |
| 1.990811722 | 2.089520126 | 2.040165924 |
| 1.911558892 | 2.162015245 | 2.036787069 |
| 2.002351435 | 2.067505321 | 2.034928378 |
| 2.002351435 | 2.067505321 | 2.034928378 |
| 1.866085822 | 2.201939749 | 2.034012786 |
| 1.866085822 | 2.201939749 | 2.034012786 |
| 1.866085822 | 2.201939749 | 2.034012786 |
| 1.866085822 | 2.201939749 | 2.034012786 |
| 1.916646751 | 2.151148318 | 2.033897535 |
| 1.921779944 | 2.143752968 | 2.032766456 |
| 1.975742482 | 2.088204581 | 2.031973531 |
| 1.912593198 | 2.1493654   | 2.030979299 |
| 1.761358477 | 2.295357229 | 2.028357853 |
| 1.761358477 | 2.295357229 | 2.028357853 |
| 1.890354429 | 2.164118023 | 2.027236226 |
| 1.792719182 | 2.261341212 | 2.027030197 |
| 1.945276494 | 2.106376333 | 2.025826414 |
| 1.935788253 | 2.112516585 | 2.024152419 |
| 1.927966884 | 2.114765332 | 2.021366108 |
| 1.98633489  | 2.053662563 | 2.019998727 |
| 1.890506773 | 2.146694674 | 2.018600723 |
| 1.904558264 | 2.129016885 | 2.016787574 |
| 2.1584208   | 1.868141685 | 2.013281243 |
| 1.949962846 | 2.076581077 | 2.013271961 |
| 1.891151849 | 2.128368333 | 2.009760091 |

|             |             |             |
|-------------|-------------|-------------|
| 1.891151849 | 2.128368333 | 2.009760091 |
| 1.815775143 | 2.203010451 | 2.009392797 |
| 2.049759876 | 1.968491386 | 2.009125631 |
| 2.000052065 | 2.01799357  | 2.009022817 |
| 1.8965668   | 2.121456359 | 2.00901158  |
| 1.952611488 | 2.062353055 | 2.007482272 |
| 1.922155405 | 2.08476261  | 2.003459008 |
| 1.956763128 | 2.049373106 | 2.003068117 |
| 1.885415587 | 2.114256514 | 1.99983605  |
| 1.833260892 | 2.164631895 | 1.998946394 |
| 1.877151876 | 2.116257404 | 1.99670464  |
| 1.958163199 | 2.035181273 | 1.996672236 |
| 1.860226121 | 2.13163721  | 1.995931665 |
| 1.99219738  | 1.999546256 | 1.995871818 |
| 1.849159834 | 2.141535517 | 1.995347676 |
| 1.897737565 | 2.092025826 | 1.994881696 |
| 1.810652582 | 2.178688863 | 1.994670723 |
| 1.992016104 | 1.99507656  | 1.993546332 |
| 1.992016104 | 1.99507656  | 1.993546332 |
| 1.992016104 | 1.99507656  | 1.993546332 |
| 1.992016104 | 1.99507656  | 1.993546332 |
| 1.849129841 | 2.135775173 | 1.992452507 |
| 1.89383772  | 2.090858819 | 1.992348269 |
| 1.960536256 | 2.023015134 | 1.991775695 |
| 2.006650182 | 1.975521154 | 1.991085668 |
| 1.876826197 | 2.105277125 | 1.991051661 |
| 1.913479467 | 2.063162949 | 1.988321208 |
| 1.856909354 | 2.117646518 | 1.987277936 |
| 1.864962735 | 2.107458567 | 1.986210651 |
| 2.143521156 | 1.828720067 | 1.986120612 |
| 1.891956917 | 2.077321321 | 1.984639119 |
| 1.939652822 | 2.029331475 | 1.984492148 |
| 2.047600741 | 1.920332688 | 1.983966714 |
| 1.898350971 | 2.062375134 | 1.980363052 |
| 1.863050208 | 2.094083956 | 1.978567082 |
| 1.895700654 | 2.057247783 | 1.976474219 |
| 1.77071072  | 2.172998625 | 1.971854673 |
| 1.7392463   | 2.203446144 | 1.971346222 |
| 1.915768047 | 2.023272086 | 1.969520066 |
| 1.907533387 | 2.019748103 | 1.963640745 |
| 1.802255727 | 2.124819242 | 1.963537485 |
| 2.002331904 | 1.924216145 | 1.963274024 |
| 1.985807117 | 1.93900996  | 1.962408539 |
| 1.757763668 | 2.166605731 | 1.962184699 |
| 2.191933386 | 1.732253941 | 1.962093663 |
| 1.987542122 | 1.935098973 | 1.961320547 |
| 1.945738766 | 1.974534365 | 1.960136566 |

|             |             |             |
|-------------|-------------|-------------|
| 1.941553798 | 1.976682318 | 1.959118058 |
| 1.983134216 | 1.933321836 | 1.958228026 |
| 1.839397462 | 2.076436328 | 1.957916895 |
| 1.832931274 | 2.081885537 | 1.957408405 |
| 1.938718563 | 1.97421636  | 1.956467461 |
| 1.986538728 | 1.920126582 | 1.953332655 |
| 1.792793263 | 2.10887406  | 1.950833661 |
| 1.878898568 | 2.021916396 | 1.950407482 |
| 1.976557014 | 1.922443872 | 1.949500443 |
| 1.890040121 | 1.997806408 | 1.943923265 |
| 1.820960993 | 2.061358468 | 1.941159731 |
| 1.820960993 | 2.06132957  | 1.941145281 |
| 1.829360854 | 2.052117929 | 1.940739391 |
| 1.800779442 | 2.080539444 | 1.940659443 |
| 1.936197127 | 1.944166797 | 1.940181962 |
| 1.810263178 | 2.069443469 | 1.939853323 |
| 1.899584022 | 1.97800947  | 1.938796746 |
| 1.916161515 | 1.961303469 | 1.938732492 |
| 1.94501404  | 1.929726048 | 1.937370044 |
| 1.911012158 | 1.957355449 | 1.934183804 |
| 1.847699527 | 2.010384042 | 1.929041785 |
| 1.867101816 | 1.990282838 | 1.928692327 |
| 1.86430072  | 1.989700287 | 1.927000503 |
| 1.885940794 | 1.966825727 | 1.92638326  |
| 1.976674078 | 1.874576616 | 1.925625347 |
| 1.837699462 | 2.010041315 | 1.923870389 |
| 1.502386072 | 2.342726218 | 1.922556145 |
| 1.854371737 | 1.988475906 | 1.921423822 |
| 1.56003503  | 2.280946655 | 1.920490843 |
| 1.56003503  | 2.280946655 | 1.920490843 |
| 1.834971391 | 2.003721023 | 1.919346207 |
| 1.834971391 | 2.003721023 | 1.919346207 |
| 1.905202266 | 1.932799142 | 1.919000704 |
| 1.790584278 | 2.044757626 | 1.917670952 |
| 1.790584278 | 2.044757626 | 1.917670952 |
| 2.177709095 | 1.648898465 | 1.91330378  |
| 2.272097076 | 1.553876397 | 1.912986736 |
| 1.810765865 | 2.014689275 | 1.91272757  |
| 1.736761812 | 2.087742604 | 1.912252208 |
| 1.844841771 | 1.979430122 | 1.912135946 |
| 1.132530557 | 2.676830139 | 1.904680348 |
| 2.021832614 | 1.787487066 | 1.90465984  |
| 1.720042416 | 2.086933742 | 1.903488079 |
| 1.809790965 | 1.991502317 | 1.900646641 |
| 1.874047356 | 1.91929078  | 1.896669068 |
| 1.817223481 | 1.971756649 | 1.894490065 |
| 2.291025471 | 1.497024473 | 1.894024972 |

|             |             |             |
|-------------|-------------|-------------|
| 1.759694645 | 2.02521315  | 1.892453898 |
| 1.759694645 | 2.02521315  | 1.892453898 |
| 1.80338258  | 1.972821468 | 1.888102024 |
| 1.933223177 | 1.839940894 | 1.886582035 |
| 1.740248682 | 2.026197103 | 1.883222892 |
| 2.280356352 | 1.483073462 | 1.881714907 |
| 1.778732639 | 1.984150206 | 1.881441422 |
| 1.828777587 | 1.925070328 | 1.876923957 |
| 1.714777299 | 2.032983755 | 1.873880527 |
| 2.261641248 | 1.483012992 | 1.87232712  |
| 2.237552088 | 1.504306004 | 1.870929046 |
| 2.249747901 | 1.485626689 | 1.867687295 |
| 1.906728248 | 1.823964768 | 1.865346508 |
| 1.727710046 | 1.9966528   | 1.862181423 |
| 1.907049892 | 1.817267524 | 1.862158708 |
| 1.7498212   | 1.974340243 | 1.862080721 |
| 2.283411321 | 1.435341355 | 1.859376338 |
| 1.788317253 | 1.927033649 | 1.857675451 |
| 2.226137991 | 1.485797433 | 1.855967712 |
| 2.233061255 | 1.477384852 | 1.855223053 |
| 2.252822709 | 1.449052505 | 1.850937607 |
| 1.805268859 | 1.887635839 | 1.846452349 |
| 2.279421685 | 1.397708991 | 1.838565338 |
| 1.955815818 | 1.718431986 | 1.837123902 |
| 1.705289413 | 1.96597993  | 1.835634671 |
| 2.20482103  | 1.46546672  | 1.835143875 |
| 2.142533296 | 1.511514192 | 1.827023744 |
| 2.610472597 | 1.038989052 | 1.824730825 |
| 1.731762982 | 1.912754503 | 1.822258743 |
| 2.360489435 | 1.266102309 | 1.813295872 |
| 2.422057152 | 1.203036325 | 1.812546739 |
| 2.245107525 | 1.377523353 | 1.811315439 |
| 2.245107525 | 1.377523353 | 1.811315439 |
| 1.612717417 | 1.999385584 | 1.806051501 |
| 1.962209839 | 1.649693281 | 1.80595156  |
| 2.158056682 | 1.450979924 | 1.804518303 |
| 2.263756112 | 1.344679364 | 1.804217738 |
| 2.271383921 | 1.336422016 | 1.803902968 |
| 1.809359237 | 1.785213323 | 1.79728628  |
| 2.245352714 | 1.334521331 | 1.789937022 |
| 1.907115102 | 1.667829889 | 1.787472496 |
| 2.168880248 | 1.401260415 | 1.785070331 |
| 2.160467027 | 1.405648856 | 1.783057942 |
| 2.160467027 | 1.405648856 | 1.783057942 |
| 1.775476064 | 1.786318976 | 1.78089752  |
| 1.726716155 | 1.832237695 | 1.779476925 |
| 1.726716155 | 1.832237695 | 1.779476925 |

|             |             |             |
|-------------|-------------|-------------|
| 2.219716665 | 1.335492702 | 1.777604684 |
| 1.17563608  | 2.376492841 | 1.77606446  |
| 2.203985845 | 1.347735776 | 1.775860811 |
| 1.754025445 | 1.790387464 | 1.772206455 |
| 2.201520469 | 1.338921258 | 1.770220864 |
| 1.658039739 | 1.869558983 | 1.763799361 |
| 2.205749725 | 1.317196218 | 1.761472971 |
| 2.193456393 | 1.329069032 | 1.761262713 |
| 2.097771927 | 1.422544635 | 1.760158281 |
| 2.140741821 | 1.374427132 | 1.757584477 |
| 1.74844191  | 1.764058454 | 1.756250182 |
| 2.168697846 | 1.341217208 | 1.754957527 |
| 2.163206144 | 1.338778897 | 1.75099252  |
| 2.16216095  | 1.332700647 | 1.747430799 |
| 1.611956811 | 1.881658302 | 1.746807557 |
| 2.408487631 | 1.062927505 | 1.735707568 |
| 2.171243555 | 1.270711089 | 1.720977322 |
| 1.616027172 | 1.823094589 | 1.719560881 |
| 2.256160015 | 1.172581822 | 1.714370919 |
| 1.580604034 | 1.840601792 | 1.710602913 |
| 1.580604034 | 1.840601792 | 1.710602913 |
| 0.604324167 | 2.816739318 | 1.710531742 |
| 2.199350129 | 1.219952189 | 1.709651159 |
| 2.122969653 | 1.294827822 | 1.708898737 |
| 2.335413573 | 1.075668415 | 1.705540994 |
| 1.040314347 | 2.361429673 | 1.70087201  |
| 1.608642341 | 1.791093968 | 1.699868155 |
| 2.170514407 | 1.200822595 | 1.685668501 |
| 0.792369418 | 2.562740911 | 1.677555164 |
| 1.683229628 | 1.669895633 | 1.67656263  |
| 1.453788648 | 1.889992527 | 1.671890587 |
| 2.229960066 | 1.107303093 | 1.668631579 |
| 1.491862032 | 1.843137206 | 1.667499619 |
| 1.816988824 | 1.516701222 | 1.666845023 |
| 1.815404721 | 1.491483567 | 1.653444144 |
| 1.815404721 | 1.491483567 | 1.653444144 |
| 1.702081033 | 1.602476662 | 1.652278848 |
| 2.104042836 | 1.197200824 | 1.65062183  |
| 1.739090436 | 1.561731493 | 1.650410964 |
| 2.157225435 | 1.124645068 | 1.640935252 |
| 1.489916942 | 1.772858697 | 1.63138782  |
| 1.596791479 | 1.648830721 | 1.6228111   |
| 1.679954884 | 1.561238252 | 1.620596568 |
| 2.175391112 | 1.057858565 | 1.616624838 |
| 1.455411742 | 1.743332582 | 1.599372162 |
| 1.743502439 | 1.446301901 | 1.59490217  |
| 1.435383868 | 1.750972357 | 1.593178113 |

|              |             |             |
|--------------|-------------|-------------|
| 1.740220421  | 1.443121615 | 1.591671018 |
| 1.740220421  | 1.443121615 | 1.591671018 |
| 1.740220421  | 1.443121615 | 1.591671018 |
| 1.465552548  | 1.704786524 | 1.585169536 |
| 1.465552548  | 1.704786524 | 1.585169536 |
| 1.602975259  | 1.555412386 | 1.579193823 |
| 2.078668847  | 1.067528528 | 1.573098688 |
| 2.0582215    | 1.086588075 | 1.572404787 |
| 0.250625191  | 2.893677307 | 1.572151249 |
| 2.173560019  | 0.958689796 | 1.566124907 |
| 2.111847539  | 1.004974334 | 1.558410936 |
| 2.111847539  | 1.004974334 | 1.558410936 |
| 1.328474085  | 1.774901523 | 1.551687804 |
| 0.094742318  | 2.992323135 | 1.543532726 |
| 0.102472909  | 2.982010675 | 1.542241792 |
| 1.530106953  | 1.528109556 | 1.529108255 |
| 1.626527108  | 1.422074197 | 1.524300653 |
| 1.319054169  | 1.728843791 | 1.52394898  |
| 0.079919921  | 2.954849109 | 1.517384515 |
| 1.548695359  | 1.484101178 | 1.516398268 |
| 1.518409278  | 1.509979056 | 1.514194167 |
| 1.518409278  | 1.509979056 | 1.514194167 |
| 1.518409278  | 1.509979056 | 1.514194167 |
| 1.518409278  | 1.509979056 | 1.514194167 |
| 2.053465468  | 0.940487834 | 1.496976651 |
| 2.010811514  | 0.982571577 | 1.496691545 |
| 0.084089909  | 2.908977782 | 1.496533845 |
| 2.119795593  | 0.865982027 | 1.49288881  |
| 0.243055239  | 2.740209476 | 1.491632357 |
| 1.281811287  | 1.695203012 | 1.48850715  |
| 0.050337487  | 2.921974724 | 1.486156106 |
| 1.366839557  | 1.599094018 | 1.482966788 |
| 1.509560264  | 1.447962742 | 1.478761503 |
| 1.412153186  | 1.524215135 | 1.46818416  |
| 1.459179436  | 1.476049414 | 1.467614425 |
| 0.045502483  | 2.888263021 | 1.466882752 |
| 0.118110334  | 2.787714676 | 1.452912505 |
| 0.211849125  | 2.690134991 | 1.450992058 |
| 0.20517931   | 2.691357769 | 1.448268539 |
| 0.202323511  | 2.668194206 | 1.435258858 |
| 0.032620805  | 2.832099587 | 1.432360196 |
| 1.55151158   | 1.308750744 | 1.430131162 |
| 0.091549807  | 2.762494634 | 1.42702222  |
| -0.026519326 | 2.879585111 | 1.426532892 |
| 2.167374514  | 0.684160778 | 1.425767646 |
| 0.144205159  | 2.68567924  | 1.4149422   |
| 0.109508255  | 2.715974747 | 1.412741501 |



|              |             |             |
|--------------|-------------|-------------|
| 0.013879325  | 2.794333364 | 1.404106345 |
| 1.782902917  | 1.008073184 | 1.395488051 |
| 1.284103678  | 1.503288324 | 1.393696001 |
| -0.017480572 | 2.796369379 | 1.389444403 |
| 0.182555906  | 2.58584044  | 1.384198173 |
| -0.050517409 | 2.809404492 | 1.379443541 |
| 0.168453635  | 2.576523955 | 1.372488795 |
| -0.023514384 | 2.764444669 | 1.370465143 |
| 1.352390117  | 1.377008004 | 1.36469906  |
| 1.352390117  | 1.377008004 | 1.36469906  |
| 0.109846848  | 2.616244534 | 1.363045691 |
| 0.037411159  | 2.686590196 | 1.362000678 |
| -0.069248666 | 2.78812741  | 1.359439372 |
| 0.041485035  | 2.668072945 | 1.35477899  |
| 2.705494198  | 0           | 1.352747099 |
| 0.039034467  | 2.666209604 | 1.352622035 |
| -0.021106805 | 2.725471465 | 1.35218233  |
| -0.25110023  | 2.954553331 | 1.351726551 |
| 0.035564116  | 2.667397798 | 1.351480957 |
| 0.003860657  | 2.698991133 | 1.351425895 |
| 0.003145023  | 2.698548068 | 1.350846545 |
| -0.007299584 | 2.700469219 | 1.346584817 |
| 0.138265331  | 2.554861941 | 1.346563636 |
| 0.032589228  | 2.658637246 | 1.345613237 |
| 0.076702678  | 2.607130716 | 1.341916697 |
| 0.016433817  | 2.665553762 | 1.34099379  |
| 0.000185     | 2.676725387 | 1.338455329 |
| 0.071843999  | 2.597503497 | 1.334673748 |
| -0.052549776 | 2.701252212 | 1.324351218 |
| 2.381689639  | 0.256871458 | 1.319280549 |
| -0.007165648 | 2.63520642  | 1.314020386 |
| -0.006182802 | 2.624857446 | 1.309337322 |
| -0.006182802 | 2.624857446 | 1.309337322 |
| -0.042724641 | 2.642190883 | 1.299733121 |
| 1.177847209  | 1.414449943 | 1.296148576 |
| -0.171689674 | 2.761364691 | 1.294837508 |
| -0.171689674 | 2.761364691 | 1.294837508 |
| -0.115955336 | 2.701020614 | 1.292532639 |
| -0.115955336 | 2.701020614 | 1.292532639 |
| 2.42245384   | 0.146131044 | 1.284292442 |
| -0.051893002 | 2.608561668 | 1.278334333 |
| -0.051893002 | 2.608561668 | 1.278334333 |
| -0.032458017 | 2.589047661 | 1.278294822 |
| 1.365841317  | 1.174710944 | 1.270276131 |
| -0.026175099 | 2.564476326 | 1.269150614 |
| -0.107344897 | 2.628231555 | 1.260443329 |
| 2.466347269  | 0           | 1.233173635 |

|             |             |             |
|-------------|-------------|-------------|
| 2.460555374 | 0           | 1.230277687 |
| 2.445633418 | 0           | 1.222816709 |
| 0.744844749 | 1.696849798 | 1.220847273 |
| 0.430524771 | 2.001461793 | 1.215993282 |
| 2.419495634 | 0           | 1.209747817 |
| 0           | 2.417727293 | 1.208863647 |
| 1.678814864 | 0.726955664 | 1.202885264 |
| 2.392364384 | 0           | 1.196182192 |
| 2.058957823 | 0.329227036 | 1.19409243  |
| 1.250519601 | 1.134772311 | 1.192645956 |
| 2.380244576 | 0           | 1.190122288 |
| 1.496559561 | 0.882400904 | 1.189480232 |
| 2.377894326 | 0           | 1.188947163 |
| 0           | 2.372982649 | 1.186491324 |
| 2.370948499 | 0           | 1.185474249 |
| 2.370268689 | 0           | 1.185134345 |
| 0           | 2.363350869 | 1.181675435 |
| 0           | 2.357125127 | 1.178562564 |
| 1.179629772 | 1.176624063 | 1.178126917 |
| 2.354241859 | 0           | 1.17712093  |
| 2.35054329  | 0           | 1.175271645 |
| 2.335746515 | 0           | 1.167873257 |
| 2.334184883 | 0           | 1.167092441 |
| 2.333629004 | 0           | 1.166814502 |
| 2.331515514 | 0           | 1.165757757 |
| 2.323749975 | 0           | 1.161874988 |
| 0           | 2.321450606 | 1.160725303 |
| 2.32126602  | 0           | 1.16063301  |
| 2.321064004 | 0           | 1.160532002 |
| 2.321064004 | 0           | 1.160532002 |
| 2.315707735 | 0           | 1.157853868 |
| 1.240458635 | 1.073148157 | 1.156803396 |
| 2.309919324 | 0           | 1.154959662 |
| 2.305556391 | 0           | 1.152778196 |
| 2.304791429 | 0           | 1.152395714 |
| 2.30213714  | 0           | 1.15106857  |
| 0.97931991  | 1.318035522 | 1.148677716 |
| 1.572795186 | 0.711281949 | 1.142038567 |
| 2.033846371 | 0.228524416 | 1.131185393 |
| 1.190350316 | 1.065693074 | 1.128021695 |
| 0           | 2.248237846 | 1.124118923 |
| 2.245125968 | 0           | 1.122562984 |
| 0           | 2.231157624 | 1.115578812 |
| 0           | 2.219055196 | 1.109527598 |
| 0           | 2.217731819 | 1.10886591  |
| 0.962359542 | 1.23557557  | 1.098967556 |
| 2.193276541 | 0           | 1.09663827  |

|             |              |             |
|-------------|--------------|-------------|
| 0           | 2.192654213  | 1.096327106 |
| 1.587165188 | 0.602804193  | 1.094984691 |
| 1.155712536 | 1.024954167  | 1.090333351 |
| 1.318759422 | 0.85168648   | 1.085222951 |
| 0           | 2.16973538   | 1.08486769  |
| 2.15408934  | 0.011327437  | 1.082708389 |
| 1.135150886 | 1.029644932  | 1.082397909 |
| 1.135150886 | 1.029644932  | 1.082397909 |
| 1.135150886 | 1.029644932  | 1.082397909 |
| 2.160730509 | 0            | 1.080365254 |
| 2.203723252 | -0.057300442 | 1.073211405 |
| 1.137792053 | 0.998077927  | 1.06793499  |
| 1.067812275 | 1.065193512  | 1.066502894 |
| 0.27296484  | 1.856336608  | 1.064650724 |
| 2.120004641 | 0            | 1.06000232  |
| 2.116191435 | 0            | 1.058095717 |
| 1.097936421 | 1.004824569  | 1.051380495 |
| 1.10374118  | 0.974490342  | 1.039115761 |
| 0.217083082 | 1.855002978  | 1.03604303  |
| 1.110315488 | 0.959142732  | 1.03472911  |
| 2.10053684  | -0.032309333 | 1.034113753 |
| 1.08071622  | 0.986147148  | 1.033431684 |
| 2.519880642 | -0.470762209 | 1.024559217 |
| 2.04004551  | 0            | 1.020022755 |
| 2.036837125 | 0            | 1.018418563 |
| 2.37484092  | -0.344573468 | 1.015133726 |
| 2.016927893 | 0            | 1.008463946 |
| 2.008464859 | 0            | 1.004232429 |
| 0           | 2.004361389  | 1.002180695 |
| 2.003601358 | 0            | 1.001800679 |
| 1.986592148 | 0            | 0.993296074 |
| 1.770955224 | 0.214020242  | 0.992487733 |
| 1.184782854 | 0.798014499  | 0.991398676 |
| 1.973397905 | 0            | 0.986698953 |
| 1.973397905 | 0            | 0.986698953 |
| 2.792688377 | -0.824139954 | 0.984274212 |
| 1.964221118 | 0            | 0.982110559 |
| 1.963692825 | 0            | 0.981846413 |
| 0.96551155  | 0.995534319  | 0.980522935 |
| 1.960891775 | 0            | 0.980445888 |
| 1.9483405   | 0            | 0.97417025  |
| 1.94357727  | 0            | 0.971788635 |
| 1.941659642 | 0            | 0.970829821 |
| 2.202707109 | -0.264048227 | 0.969329441 |
| 2.242583636 | -0.308264529 | 0.967159553 |
| 2.242583636 | -0.308264529 | 0.967159553 |
| 1.929924595 | 0            | 0.964962298 |

|             |              |             |
|-------------|--------------|-------------|
| 1.067884503 | 0.861493046  | 0.964688775 |
| 1.921462854 | 0            | 0.960731427 |
| 2.181175694 | -0.262986625 | 0.959094535 |
| 2.153553863 | -0.237781856 | 0.957886003 |
| 2.220052293 | -0.30478532  | 0.957633486 |
| 2.142750665 | -0.232897196 | 0.954926735 |
| 1.908091365 | 0            | 0.954045682 |
| 0.868663127 | 1.028766312  | 0.948714719 |
| 2.031146414 | -0.135471525 | 0.947837445 |
| 1.881787425 | 0            | 0.940893712 |
| 1.877039552 | 0            | 0.938519776 |
| 1.859050157 | 0            | 0.929525078 |
| 1.724147362 | 0.133434834  | 0.928791098 |
| 2.409289769 | -0.555604509 | 0.92684263  |
| 1.84975231  | 0            | 0.924876155 |
| 1.065181276 | 0.780247874  | 0.922714575 |
| 1.095305706 | 0.748631446  | 0.921968576 |
| 1.095232369 | 0.748603759  | 0.921918064 |
| 0.951819477 | 0.889213084  | 0.92051628  |
| 1.840053932 | 0            | 0.920026966 |
| 1.840053932 | 0            | 0.920026966 |
| 2.236503318 | -0.397946586 | 0.919278366 |
| 1.837798587 | 0            | 0.918899293 |
| 1.83413312  | 0            | 0.91706656  |
| 1.823569192 | 0            | 0.911784596 |
| 1.307189027 | 0.514138536  | 0.910663781 |
| 1.100579605 | 0.720511043  | 0.910545324 |
| 1.801355315 | 0            | 0.900677657 |
| 2.164779248 | -0.37829584  | 0.893241704 |
| 2.187141931 | -0.402534453 | 0.892303739 |
| 2.084987796 | -0.301625434 | 0.891681181 |
| 1.050678627 | 0.732279422  | 0.891479025 |
| 1.782677413 | 0            | 0.891338707 |
| 2.199261989 | -0.417401455 | 0.890930267 |
| 2.198127827 | -0.418104013 | 0.890011907 |
| 2.195809747 | -0.417436733 | 0.889186507 |
| 1.776519319 | 0            | 0.888259659 |
| 2.178026971 | -0.403886534 | 0.887070219 |
| 2.033718346 | -0.261833353 | 0.885942496 |
| 1.765757843 | 0            | 0.882878922 |
| 0.885377091 | 0.873554477  | 0.879465784 |
| 2.201095849 | -0.444965538 | 0.878065155 |
| 2.187940102 | -0.431939841 | 0.87800013  |
| 2.160901765 | -0.429290637 | 0.865805564 |
| 1.727600594 | 0            | 0.863800297 |
| 2.168571256 | -0.445393042 | 0.861589107 |
| 2.251413284 | -0.529122328 | 0.861145478 |

|             |              |             |
|-------------|--------------|-------------|
| 1.720263607 | 0            | 0.860131803 |
| 2.104652979 | -0.389046981 | 0.857802999 |
| 2.104652979 | -0.389046981 | 0.857802999 |
| 0.873791618 | 0.81562115   | 0.844706384 |
| 2.196154233 | -0.520889357 | 0.837632438 |
| 0.750579096 | 0.913277452  | 0.831928274 |
| 1.651093899 | 0            | 0.825546949 |
| 0.626603067 | 1.020213347  | 0.823408207 |
| 1.642367523 | 0            | 0.821183762 |
| 2.294196484 | -0.664072675 | 0.815061904 |
| 0.676216796 | 0.947864324  | 0.81204056  |
| 1.585740621 | 0.023239308  | 0.804489965 |
| 2.124979445 | -0.517034946 | 0.80397225  |
| 0.977534852 | 0.628104626  | 0.802819739 |
| 1.604785577 | 0            | 0.802392789 |
| 1.102086544 | 0.482401507  | 0.792244026 |
| 1.120183494 | 0.436229691  | 0.778206592 |
| 1.340652574 | 0.202448617  | 0.771550596 |
| 2.106575209 | -0.57576333  | 0.765405939 |
| 1.650249317 | -0.130543363 | 0.759852977 |
| 2.037486197 | -0.528349161 | 0.754568518 |
| 1.972323846 | -0.470015523 | 0.751154161 |
| 0.524832252 | 0.965451708  | 0.74514198  |
| 0.579979226 | 0.895579905  | 0.737779566 |
| 1.03159067  | 0.443698981  | 0.737644826 |
| 0.87328106  | 0.599894368  | 0.736587714 |
| 0           | 1.466583597  | 0.733291799 |
| 0.873785505 | 0.584804944  | 0.729295224 |
| 0.805422943 | 0.650082668  | 0.727752806 |
| 0.672838414 | 0.760072807  | 0.71645561  |
| 1.752258555 | -0.320061055 | 0.71609875  |
| 2.026480279 | -0.597021818 | 0.714729231 |
| 2.026480279 | -0.597021818 | 0.714729231 |
| 1.936422825 | -0.524973257 | 0.705724784 |
| 0.925894225 | 0.483708601  | 0.704801413 |
| 0           | 1.40958262   | 0.70479131  |
| 2.153231365 | -0.761091603 | 0.696069881 |
| 2.147590529 | -0.762177183 | 0.692706673 |
| 2.146775025 | -0.762479099 | 0.692147963 |
| 2.002488681 | -0.625651038 | 0.688418822 |
| 1.731471699 | -0.365757952 | 0.682856874 |
| 0.437231535 | 0.918482119  | 0.677856827 |
| 0.719913574 | 0.626669456  | 0.673291515 |
| 1.629221325 | -0.303811704 | 0.662704811 |
| 0.752304089 | 0.567677326  | 0.659990707 |
| 2.123761138 | -0.805127795 | 0.659316671 |
| 1.310652727 | 0            | 0.655326363 |

|              |              |             |
|--------------|--------------|-------------|
| 0            | 1.301776346  | 0.650888173 |
| 1.293762892  | 0            | 0.646881446 |
| 0.776469517  | 0.516843043  | 0.64665628  |
| 2.118949696  | -0.846235664 | 0.636357016 |
| 0.900236539  | 0.365584565  | 0.632910552 |
| 1.614452987  | -0.365685607 | 0.62438369  |
| 0.690861592  | 0.542574537  | 0.616718065 |
| 2.256253084  | -1.034539449 | 0.610856817 |
| 1.68217658   | -0.467063557 | 0.607556512 |
| 2.090658073  | -0.876370015 | 0.607144029 |
| 2.090658073  | -0.876370015 | 0.607144029 |
| 1.576220993  | -0.370659329 | 0.602780832 |
| 1.576220993  | -0.370659329 | 0.602780832 |
| 0.567009025  | 0.62989945   | 0.598454237 |
| 2.028684886  | -0.852951113 | 0.587866886 |
| 1.675159775  | -0.502609048 | 0.586275363 |
| 2.007893519  | -0.8684766   | 0.569708459 |
| 1.597822714  | -0.474419938 | 0.561701388 |
| -0.175101523 | 1.280817576  | 0.552858026 |
| 0.551226534  | 0.553104565  | 0.552165549 |
| 1.057122218  | 0.0352843    | 0.546203259 |
| 1.696220936  | -0.607116455 | 0.54455224  |
| 0.183052431  | 0.904531969  | 0.5437922   |
| 0.640736762  | 0.443562245  | 0.542149504 |
| 0.63517754   | 0.43991339   | 0.537545465 |
| 0            | 1.063682357  | 0.531841178 |
| 0.222988871  | 0.838712806  | 0.530850839 |
| 0.379157357  | 0.676232049  | 0.527694703 |
| 0.555104101  | 0.492039925  | 0.523572013 |
| 0            | 1.041480877  | 0.520740438 |
| 0            | 1.036804005  | 0.518402003 |
| 0            | 1.036804005  | 0.518402003 |
| 1.620510287  | -0.584261647 | 0.51812432  |
| 0.689360385  | 0.333741962  | 0.511551174 |
| 0.483451466  | 0.538612563  | 0.511032015 |
| 2.006616111  | -0.992296359 | 0.507159876 |
| 0.440822625  | 0.55733612   | 0.499079373 |
| 0.984290838  | 0            | 0.492145419 |
| 0.461952248  | 0.521983333  | 0.49196779  |
| 0.685682774  | 0.293300225  | 0.4894915   |
| 1.536658633  | -0.560075446 | 0.488291593 |
| 0.458026585  | 0.512447963  | 0.485237274 |
| 0            | 0.96830743   | 0.484153715 |
| 0.456470633  | 0.511749906  | 0.48411027  |
| 0.386587538  | 0.557752643  | 0.47217009  |
| 0.412789744  | 0.527802147  | 0.470295946 |
| 0.303353898  | 0.621795916  | 0.462574907 |

|             |              |             |
|-------------|--------------|-------------|
| 0.303353898 | 0.621795916  | 0.462574907 |
| 0.833034657 | 0.083492863  | 0.45826376  |
| 0.832971277 | 0.083484413  | 0.458227845 |
| 0.640902744 | 0.271745171  | 0.456323958 |
| 0.481916176 | 0.416191405  | 0.449053791 |
| 0           | 0.889554469  | 0.444777234 |
| 0.479620892 | 0.405447063  | 0.442533977 |
| 0.507961616 | 0.36283274   | 0.435397178 |
| 2.112493282 | -1.257184638 | 0.427654322 |
| 0.252434366 | 0.591396142  | 0.421915254 |
| 0.602798362 | 0.22137997   | 0.412089166 |
| 1.030960444 | -0.207499663 | 0.411730391 |
| 0.49270807  | 0.329216903  | 0.410962486 |
| 0.796399637 | 0.020624618  | 0.408512127 |
| 0.95279966  | -0.136796222 | 0.408001719 |
| 0           | 0.807302616  | 0.403651308 |
| 0.402737001 | 0.392884447  | 0.397810724 |
| 0.286416975 | 0.505707434  | 0.396062205 |
| 0.373565762 | 0.391918061  | 0.382741912 |
| 0           | 0.760790891  | 0.380395446 |
| 0           | 0.760790891  | 0.380395446 |
| 0.193167539 | 0.562740701  | 0.37795412  |
| 0.262950387 | 0.487919183  | 0.375434785 |
| 0.453026127 | 0.292880635  | 0.372953381 |
| 0.196099585 | 0.549450742  | 0.372775164 |
| 0           | 0.742394802  | 0.371197401 |
| 0.517287091 | 0.22314896   | 0.370218026 |
| 0.090598105 | 0.648866576  | 0.369732341 |
| 0.331529496 | 0.399626689  | 0.365578093 |
| 0.362224881 | 0.363034269  | 0.362629575 |
| 0.611161729 | 0.112873163  | 0.362017446 |
| 0.269332846 | 0.448397916  | 0.358865381 |
| 0.147649818 | 0.567615451  | 0.357632635 |
| 0           | 0.712833296  | 0.356416648 |
| 0.204219631 | 0.50826078   | 0.356240205 |
| 0.070967894 | 0.636800305  | 0.3538841   |
| 0.740620793 | -0.034931257 | 0.352844768 |
| 0.071656721 | 0.629952564  | 0.350804642 |
| 0           | 0.687159207  | 0.343579604 |
| 0           | 0.687159207  | 0.343579604 |
| 0.074416702 | 0.612464518  | 0.34344061  |
| 0.219192544 | 0.466020379  | 0.342606461 |
| 0           | 0.678389608  | 0.339194804 |
| 0           | 0.674242964  | 0.337121482 |
| 1.800016528 | -1.13051658  | 0.334749974 |
| 0           | 0.66716553   | 0.333582765 |
| 0.075609692 | 0.582304923  | 0.328957308 |

|              |              |             |
|--------------|--------------|-------------|
| 0.401872832  | 0.254399826  | 0.328136329 |
| -0.071292227 | 0.724060927  | 0.32638435  |
| 0.360409601  | 0.276336353  | 0.318372977 |
| 0.076796208  | 0.559099994  | 0.317948101 |
| 0            | 0.632761636  | 0.316380818 |
| 0            | 0.631374371  | 0.315687185 |
| 0            | 0.624986882  | 0.312493441 |
| 0            | 0.621373216  | 0.310686608 |
| 0            | 0.620763593  | 0.310381797 |
| 0.318023916  | 0.302583483  | 0.310303699 |
| 0.398964417  | 0.220879295  | 0.309921856 |
| 0            | 0.595060585  | 0.297530292 |
| 0.064644084  | 0.523825032  | 0.294234558 |
| 0.584214884  | 0            | 0.292107442 |
| 0.248545612  | 0.335484768  | 0.29201519  |
| 0.435263149  | 0.135344981  | 0.285304065 |
| 0.35262698   | 0.210350446  | 0.281488713 |
| 0            | 0.562004412  | 0.281002206 |
| 0.258253829  | 0.302623523  | 0.280438676 |
| 0.335279994  | 0.224408791  | 0.279844393 |
| 0.557706968  | 0            | 0.278853484 |
| 0.556635507  | 0            | 0.278317754 |
| 0.244599279  | 0.30875962   | 0.27667945  |
| 0            | 0.551149508  | 0.275574754 |
| 0.247947378  | 0.274050918  | 0.260999148 |
| 0.213163282  | 0.305604122  | 0.259383702 |
| 0.178399958  | 0.334624355  | 0.256512157 |
| 0.676973298  | -0.169174073 | 0.253899612 |
| -0.039833849 | 0.534225178  | 0.247195665 |
| 0            | 0.458995719  | 0.229497859 |
| 0            | 0.441170539  | 0.220585269 |
| 0.681355179  | -0.251618879 | 0.21486815  |
| 0            | 0.410488326  | 0.205244163 |
| 0            | 0.401110601  | 0.200555301 |
| 0            | 0.389247491  | 0.194623745 |
| 0            | 0.385585405  | 0.192792702 |
| 0.111023837  | 0.272354536  | 0.191689186 |
| 0.208623643  | 0.172426814  | 0.190525228 |
| 0            | 0.378566641  | 0.18928332  |
| 0            | 0.375598382  | 0.187799191 |
| 0.501480364  | -0.139992452 | 0.180743956 |
| 0            | 0.351983491  | 0.175991745 |
| 0.259977593  | 0.089926671  | 0.174952132 |
| 0.359000786  | -0.010785367 | 0.174107709 |
| 0            | 0.348091873  | 0.174045936 |
| 0.079744634  | 0.260768654  | 0.170256644 |
| 0.079744634  | 0.260768654  | 0.170256644 |



|              |              |             |
|--------------|--------------|-------------|
| 0.188903789  | 0.141983468  | 0.165443628 |
| 0.176095425  | 0.152183866  | 0.164139646 |
| 0.276266774  | 0.049648194  | 0.162957484 |
| 0.273553096  | 0.042210241  | 0.157881668 |
| 0.427234241  | -0.111601963 | 0.157816139 |
| -0.154558948 | 0.462906     | 0.154173526 |
| 0.470632119  | -0.163121292 | 0.153755413 |
| 0.241167595  | 0.065885739  | 0.153526667 |
| 0.032408051  | 0.27427118   | 0.153339616 |
| 0.1839075    | 0.11842787   | 0.151167685 |
| 0.369399183  | -0.070223796 | 0.149587693 |
| 0.08122318   | 0.21778701   | 0.149505095 |
| 0.289535967  | 0            | 0.144767984 |
| -0.332722423 | 0.615941935  | 0.141609756 |
| -0.144417209 | 0.426668032  | 0.141125411 |
| 0.276619098  | 0            | 0.138309549 |
| 0.151946063  | 0.106467668  | 0.129206866 |
| 0.151946063  | 0.106467668  | 0.129206866 |
| -0.188808843 | 0.443527877  | 0.127359517 |
| 0            | 0.246220734  | 0.123110367 |
| 0.450937457  | -0.20483547  | 0.123050993 |
| 0            | 0.245253788  | 0.122626894 |
| 0.243013829  | 0            | 0.121506915 |
| 0            | 0.238173331  | 0.119086665 |
| 0.10939188   | 0.126852742  | 0.118122311 |
| 0            | 0.235037152  | 0.117518576 |
| 0.338860856  | -0.109944388 | 0.114458234 |
| 0.182185624  | 0.045886486  | 0.114036055 |
| 0            | 0.227897031  | 0.113948515 |
| 0.150504981  | 0.073654245  | 0.112079613 |
| 0.390355669  | -0.16830541  | 0.11102513  |
| 0.149702456  | 0.069018248  | 0.109360352 |
| 0.218188807  | 0            | 0.109094403 |
| 0            | 0.217081315  | 0.108540658 |
| 0.415918637  | -0.20223929  | 0.106839674 |
| 0.169011497  | 0.038452531  | 0.103732014 |
| 0.097867298  | 0.107641047  | 0.102754172 |
| 0.203451177  | 0            | 0.101725588 |
| 0.225820182  | -0.022852394 | 0.101483894 |
| 0            | 0.19929506   | 0.09964753  |
| 0.197423861  | 0            | 0.098711931 |
| 0.197423861  | 0            | 0.098711931 |
| -0.032264863 | 0.2267541    | 0.097244619 |
| 0.323461888  | -0.130601798 | 0.096430045 |
| 0            | 0.192741747  | 0.096370873 |
| -0.078207312 | 0.270480327  | 0.096136508 |
| 0.349654434  | -0.162188963 | 0.093732736 |

|              |              |             |
|--------------|--------------|-------------|
| 0            | 0.186397208  | 0.093198604 |
| 0.175867343  | 0.005535817  | 0.09070158  |
| 0.048285694  | 0.130106578  | 0.089196136 |
| 0.173857714  | 0            | 0.086928857 |
| 0.169215506  | 0            | 0.084607753 |
| 0.167863722  | 0            | 0.083931861 |
| 0            | 0.166494642  | 0.083247321 |
| 0            | 0.154046881  | 0.07702344  |
| 0            | 0.154016917  | 0.077008458 |
| 0.123594537  | 0.029823187  | 0.076708862 |
| -0.010858914 | 0.16399867   | 0.076569878 |
| 0.141671396  | 0            | 0.070835698 |
| 0.446032008  | -0.304563257 | 0.070734375 |
| 0.242717529  | -0.106620232 | 0.068048649 |
| 0.099072461  | 0.036086091  | 0.067579276 |
| -0.051393534 | 0.182495993  | 0.06555123  |
| 0.075717722  | 0.051968805  | 0.063843264 |
| 0.119764258  | 0            | 0.059882129 |
| 0.43360184   | -0.315130981 | 0.05923543  |
| 0            | 0.103889069  | 0.051944535 |
| 0            | 0.099426399  | 0.0497132   |
| 0            | 0.098378688  | 0.049189344 |
| 0            | 0.098378688  | 0.049189344 |
| 0            | 0.098378688  | 0.049189344 |
| 0.129246085  | -0.03223999  | 0.048503048 |
| 0.108163101  | -0.015922939 | 0.046120081 |
| 0.088858598  | 0            | 0.044429299 |
| 0            | 0.086366047  | 0.043183024 |
| 0.170701302  | -0.08528288  | 0.042709211 |
| 0            | 0.082714434  | 0.041357217 |
| 0.067829684  | 0.014673043  | 0.041251363 |
| 0            | 0.081637284  | 0.040818642 |
| 0.129981066  | -0.054013734 | 0.037983666 |
| 0.082817048  | -0.007371691 | 0.037722679 |
| 0.064010799  | 0.010226357  | 0.037118578 |
| 0.07345702   | 0            | 0.03672851  |
| 0.075255433  | -0.002011505 | 0.036621964 |
| 0.07154107   | 0.000874     | 0.036207484 |
| 0.07154107   | 0.000874     | 0.036207484 |
| 0.069069698  | 0            | 0.034534849 |
| 0.092135795  | -0.023091612 | 0.034522092 |
| 0.09150161   | -0.027505365 | 0.031998123 |
| 0            | 0.062203891  | 0.031101945 |
| 0            | 0.061934156  | 0.030967078 |
| 0.056777239  | 0            | 0.028388619 |
| 0.056777239  | 0            | 0.028388619 |
| 0.056009324  | 0            | 0.028004662 |





































































































































































































|              |              |              |
|--------------|--------------|--------------|
| 0            | 0            | 0            |
| 0            | 0            | 0            |
| 0            | 0            | 0            |
| 0            | 0            | 0            |
| 0            | 0            | 0            |
| 0            | 0            | 0            |
| 0            | 0            | 0            |
| 0            | 0            | 0            |
| 0            | 0            | 0            |
| 0            | -0.003714588 | -0.001857294 |
| 0            | -0.005124746 | -0.002562373 |
| 0            | -0.00623503  | -0.003117515 |
| -0.077138901 | 0.070729676  | -0.003204613 |
| 0            | -0.008292596 | -0.004146298 |
| -0.013059405 | 0            | -0.006529703 |
| 0.228177518  | -0.242488245 | -0.007155363 |
| -0.316823183 | 0.299663819  | -0.008579682 |
| 0.032836315  | -0.0510169   | -0.009090292 |
| 0            | -0.021707951 | -0.010853975 |
| 0.173455077  | -0.19560684  | -0.011075882 |
| 0            | -0.022758278 | -0.011379139 |
| 0            | -0.025374401 | -0.012687201 |
| -0.026870007 | 0            | -0.013435003 |
| 0            | -0.030052387 | -0.015026193 |
| 0.138961983  | -0.170325458 | -0.015681738 |
| 0            | -0.033783991 | -0.016891995 |
| -0.036202504 | 0            | -0.018101252 |
| -0.036488118 | 0            | -0.018244059 |
| -0.036488118 | 0            | -0.018244059 |
| 0.232629932  | -0.270153718 | -0.018761893 |
| -0.038494147 | 0            | -0.019247073 |
| -0.038494147 | 0            | -0.019247073 |
| 0            | -0.042426817 | -0.021213408 |
| 0.019505004  | -0.062365371 | -0.021430183 |
| 0.158354467  | -0.206231786 | -0.023938659 |
| -0.093056956 | 0.042044932  | -0.025506012 |
| 0            | -0.052164935 | -0.026082467 |
| 0            | -0.053796925 | -0.026898463 |
| -0.464924459 | 0.411020712  | -0.026951874 |
| 0            | -0.056733614 | -0.028366807 |
| 0            | -0.056959523 | -0.028479761 |
| 0            | -0.060598126 | -0.030299063 |
| 0.039471641  | -0.10298843  | -0.031758395 |
| 0            | -0.067361639 | -0.033680819 |
| 0            | -0.068380839 | -0.034190419 |
| 0            | -0.069734294 | -0.034867147 |
| -0.20513509  | 0.1284421    | -0.038346495 |
| -0.041531527 | -0.036138019 | -0.038834773 |

|              |              |              |
|--------------|--------------|--------------|
| 0            | -0.077955875 | -0.038977938 |
| 0            | -0.078183527 | -0.039091764 |
| -0.10842849  | 0.02894913   | -0.03973968  |
| -0.079655113 | 0            | -0.039827556 |
| -0.084727675 | 0            | -0.042363838 |
| 0            | -0.087982513 | -0.043991257 |
| 0            | -0.090083014 | -0.045041507 |
| -0.083459198 | -0.0073648   | -0.045411999 |
| 0            | -0.095743262 | -0.047871631 |
| 0            | -0.096858117 | -0.048429059 |
| 0.12001395   | -0.221943702 | -0.050964876 |
| -0.341973356 | 0.238208338  | -0.051882509 |
| 0            | -0.106853573 | -0.053426786 |
| 0.478249038  | -0.590159619 | -0.05595529  |
| 0.193079236  | -0.309323187 | -0.058121975 |
| -0.091618561 | -0.033824826 | -0.062721693 |
| -0.12570427  | 0            | -0.062852135 |
| 0            | -0.127311648 | -0.063655824 |
| 0.035791979  | -0.163465178 | -0.0638366   |
| 0            | -0.131251037 | -0.065625519 |
| -0.142312523 | 0            | -0.071156261 |
| -0.146011892 | 0            | -0.073005946 |
| -0.146011892 | 0            | -0.073005946 |
| -0.058565862 | -0.087667207 | -0.073116534 |
| -0.155328053 | 0.006792889  | -0.074267582 |
| 0            | -0.151949208 | -0.075974604 |
| 0            | -0.15510533  | -0.077552665 |
| 0.435412119  | -0.59213184  | -0.078359861 |
| -0.290191819 | 0.132783373  | -0.078704223 |
| 0.007455445  | -0.165645773 | -0.079095164 |
| 0            | -0.158690132 | -0.079345066 |
| -0.176693971 | 0            | -0.088346985 |
| 0            | -0.178852155 | -0.089426077 |
| 0            | -0.181822273 | -0.090911136 |
| 0            | -0.181822273 | -0.090911136 |
| 0            | -0.184838233 | -0.092419117 |
| 0            | -0.185864436 | -0.092932218 |
| 0            | -0.191314661 | -0.09565733  |
| -0.298507241 | 0.100135035  | -0.099186103 |
| 0            | -0.204160465 | -0.102080232 |
| 0.092635257  | -0.304346797 | -0.10585577  |
| -0.215038779 | 0            | -0.10751939  |
| 0            | -0.217865688 | -0.108932844 |
| 0            | -0.219300381 | -0.109650191 |
| -0.219722128 | -0.000961    | -0.110341645 |
| 0            | -0.223419056 | -0.111709528 |
| -0.228570208 | 0            | -0.114285104 |

|              |              |              |
|--------------|--------------|--------------|
| -0.228690632 | 0            | -0.114345316 |
| -0.148803884 | -0.081289453 | -0.115046668 |
| -0.121563145 | -0.112412187 | -0.116987666 |
| 0            | -0.23407789  | -0.117038945 |
| -0.238202072 | 0            | -0.119101036 |
| -0.239243173 | 0            | -0.119621587 |
| 0            | -0.23940711  | -0.119703555 |
| -0.016897921 | -0.222800618 | -0.119849269 |
| 0            | -0.240822275 | -0.120411137 |
| -0.247884785 | 0            | -0.123942393 |
| -0.153275768 | -0.097885816 | -0.125580792 |
| 0            | -0.257445664 | -0.128722832 |
| -0.268548027 | 0.007851577  | -0.130348225 |
| -0.362053727 | 0.099755775  | -0.131148976 |
| 0            | -0.263226838 | -0.131613419 |
| 0            | -0.266250032 | -0.133125016 |
| 0            | -0.26778713  | -0.133893565 |
| 0            | -0.26778713  | -0.133893565 |
| 0.46666696   | -0.735087843 | -0.134210441 |
| -0.274277265 | 0            | -0.137138632 |
| -0.275707552 | 0            | -0.137853776 |
| 0            | -0.279904569 | -0.139952284 |
| 0            | -0.282742156 | -0.141371078 |
| -0.543720967 | 0.251635365  | -0.146042801 |
| -0.303098529 | 0            | -0.151549265 |
| -0.737318552 | 0.432995634  | -0.152161459 |
| 0            | -0.322972867 | -0.161486433 |
| 0            | -0.330694716 | -0.165347358 |
| -0.285018083 | -0.045799176 | -0.16540863  |
| 0            | -0.332237533 | -0.166118767 |
| 0            | -0.334015448 | -0.167007724 |
| 0            | -0.334947265 | -0.167473633 |
| 0            | -0.335802307 | -0.167901153 |
| 0            | -0.335901939 | -0.167950969 |
| 0.212492523  | -0.54968181  | -0.168594644 |
| 0            | -0.343648874 | -0.171824437 |
| 0            | -0.352491141 | -0.17624557  |
| -0.353528373 | 0            | -0.176764186 |
| 0            | -0.354884918 | -0.177442459 |
| -0.198079131 | -0.159475329 | -0.17877723  |
| -0.221738856 | -0.136183708 | -0.178961282 |
| -0.221738856 | -0.136183708 | -0.178961282 |
| 0            | -0.36459946  | -0.18229973  |
| 0            | -0.369487031 | -0.184743516 |
| 0            | -0.369487031 | -0.184743516 |
| -0.189037787 | -0.184967935 | -0.187002861 |
| 0            | -0.374640412 | -0.187320206 |

|              |              |              |
|--------------|--------------|--------------|
| 0            | -0.380101558 | -0.190050779 |
| 0            | -0.383636153 | -0.191818076 |
| 0            | -0.384290362 | -0.192145181 |
| 0            | -0.384917821 | -0.192458911 |
| 0            | -0.392613166 | -0.196306583 |
| -0.393319619 | 0            | -0.196659809 |
| 0            | -0.401979552 | -0.200989776 |
| 0            | -0.407235995 | -0.203617998 |
| -0.40730317  | 0            | -0.203651585 |
| 0            | -0.4116433   | -0.20582165  |
| 0            | -0.411771441 | -0.20588572  |
| 0.277838363  | -0.690368826 | -0.206265232 |
| 0            | -0.414088468 | -0.207044234 |
| 0            | -0.431495964 | -0.215747982 |
| 0            | -0.432687667 | -0.216343834 |
| 0            | -0.438660582 | -0.219330291 |
| -0.289903637 | -0.149786626 | -0.219845132 |
| -0.44445786  | 0            | -0.22222893  |
| -0.445376491 | 0            | -0.222688246 |
| -0.26931525  | -0.177477694 | -0.223396472 |
| -0.254038912 | -0.199033113 | -0.226536013 |
| -0.460022267 | 0            | -0.230011133 |
| 0            | -0.460405595 | -0.230202797 |
| -0.465038253 | 0            | -0.232519127 |
| 0            | -0.465549166 | -0.232774583 |
| 0            | -0.469602399 | -0.234801199 |
| 0            | -0.473619064 | -0.236809532 |
| 0            | -0.473619064 | -0.236809532 |
| -0.332739004 | -0.146553073 | -0.239646039 |
| 0            | -0.485315383 | -0.242657692 |
| 0.319079727  | -0.805730074 | -0.243325174 |
| 0            | -0.490946349 | -0.245473175 |
| -0.311049605 | -0.181620616 | -0.24633511  |
| 0            | -0.493277643 | -0.246638821 |
| 0            | -0.494540693 | -0.247270346 |
| 0.847293932  | -1.342745872 | -0.24772597  |
| -0.49653114  | 0            | -0.24826557  |
| -0.075426059 | -0.425683192 | -0.250554625 |
| 0            | -0.501172943 | -0.250586472 |
| -0.507741907 | 0            | -0.253870954 |
| -0.514384141 | 0            | -0.25719207  |
| -0.516037126 | 0            | -0.258018563 |
| -0.011642454 | -0.505697228 | -0.258669841 |
| -0.517687965 | 0            | -0.258843983 |
| 0            | -0.524971359 | -0.262485679 |
| -0.52514479  | 0            | -0.262572395 |
| -0.19631079  | -0.329053795 | -0.262682292 |

|              |              |              |
|--------------|--------------|--------------|
| -0.402272482 | -0.12317022  | -0.262721351 |
| -0.525733857 | 0            | -0.262866928 |
| 0.089505767  | -0.617761242 | -0.264127738 |
| 0            | -0.529792007 | -0.264896003 |
| -0.530899425 | 0            | -0.265449713 |
| -0.536253309 | 0            | -0.268126655 |
| 0            | -0.541016441 | -0.270508221 |
| 0.054845025  | -0.596882871 | -0.271018923 |
| 0            | -0.542078324 | -0.271039162 |
| -0.543385992 | 0            | -0.271692996 |
| -0.134945601 | -0.409169897 | -0.272057749 |
| -0.546482547 | 0            | -0.273241274 |
| -0.550472005 | 0            | -0.275236003 |
| -0.263613001 | -0.287899983 | -0.275756492 |
| -0.554930848 | 0            | -0.277465424 |
| -0.556034167 | 0            | -0.278017083 |
| 0            | -0.556371258 | -0.278185629 |
| -0.291001165 | -0.265928593 | -0.278464879 |
| -0.15354754  | -0.40359097  | -0.278569255 |
| -0.408332329 | -0.149403687 | -0.278868008 |
| -0.560043825 | 0            | -0.280021913 |
| -0.560622057 | 0            | -0.280311028 |
| -0.565638704 | 0            | -0.282819352 |
| -0.565693911 | 0            | -0.282846955 |
| -0.568385418 | 0            | -0.284192709 |
| -0.352755822 | -0.217652604 | -0.285204213 |
| -0.139728814 | -0.43106939  | -0.285399102 |
| -0.573203462 | 0            | -0.286601731 |
| -0.575685675 | 0            | -0.287842837 |
| 0            | -0.58223427  | -0.291117135 |
| 1.064306332  | -1.647828843 | -0.291761256 |
| -0.198365083 | -0.385561704 | -0.291963394 |
| 0            | -0.584288198 | -0.292144099 |
| -0.585446754 | 0            | -0.292723377 |
| -0.586022327 | 0            | -0.293011164 |
| 0            | -0.588111248 | -0.294055624 |
| 0            | -0.588300048 | -0.294150024 |
| -0.191301058 | -0.399255786 | -0.295278422 |
| -0.592671926 | 0            | -0.296335963 |
| -0.594438073 | 0            | -0.297219037 |
| -0.594438073 | 0            | -0.297219037 |
| -0.595098828 | 0            | -0.297549414 |
| -0.595149897 | 0            | -0.297574948 |
| -0.595247971 | 0            | -0.297623985 |
| 0            | -0.59616804  | -0.29808402  |
| -0.460666584 | -0.136201079 | -0.298433832 |
| -0.630105027 | 0.033029871  | -0.298537578 |

|              |              |              |
|--------------|--------------|--------------|
| 0            | -0.59882403  | -0.299412015 |
| -0.598855634 | 0            | -0.299427817 |
| -0.599469057 | 0            | -0.299734529 |
| 0.122777562  | -0.726555956 | -0.301889197 |
| -0.604537758 | 0            | -0.302268879 |
| -0.604537758 | 0            | -0.302268879 |
| -0.605395519 | 0            | -0.30269776  |
| -0.606299428 | 0            | -0.303149714 |
| -0.608617656 | 0            | -0.304308828 |
| -0.608987208 | 0            | -0.304493604 |
| -0.610201281 | 0            | -0.30510064  |
| 0            | -0.610895858 | -0.305447929 |
| 0            | -0.61186767  | -0.305933835 |
| -0.61341065  | 0            | -0.306705325 |
| -0.615862799 | 0            | -0.307931399 |
| -0.618116651 | 0            | -0.309058325 |
| 0            | -0.625928671 | -0.312964336 |
| -0.627471683 | 0            | -0.313735841 |
| 0            | -0.627844457 | -0.313922228 |
| -0.457225778 | -0.171248868 | -0.314237323 |
| 0            | -0.633543174 | -0.316771587 |
| -0.505867048 | -0.128730896 | -0.317298972 |
| -0.641604223 | 0            | -0.320802112 |
| 0.118849644  | -0.76422501  | -0.322687683 |
| 0.985725759  | -1.63601944  | -0.32514684  |
| -0.650414384 | 0            | -0.325207192 |
| -0.651744342 | 0            | -0.325872171 |
| -0.652390866 | 0            | -0.326195433 |
| -0.658408325 | 0            | -0.329204162 |
| -0.65859769  | 0            | -0.329298845 |
| -0.659951849 | 0            | -0.329975925 |
| -0.660466436 | 0            | -0.330233218 |
| -0.662771907 | 0            | -0.331385954 |
| -0.662953549 | 0            | -0.331476774 |
| 0.552805562  | -1.216483942 | -0.33183919  |
| -0.663709379 | 0            | -0.33185469  |
| -0.66503101  | 0            | -0.332515505 |
| -0.665503233 | 0            | -0.332751617 |
| -0.669227496 | 0            | -0.334613748 |
| -0.672157668 | 0            | -0.336078834 |
| -0.669698931 | -0.004157495 | -0.336928213 |
| -0.090767891 | -0.585196029 | -0.33798196  |
| -0.677713252 | 0            | -0.338856626 |
| 0            | -0.678201018 | -0.339100509 |
| 0            | -0.678201018 | -0.339100509 |
| -0.856679408 | 0.177036778  | -0.339821315 |
| -0.680991685 | 0            | -0.340495842 |

|              |              |              |
|--------------|--------------|--------------|
| -0.682484357 | 0            | -0.341242178 |
| -0.683066804 | 0            | -0.341533402 |
| -0.686964371 | 0            | -0.343482185 |
| -0.687547137 | 0            | -0.343773568 |
| -0.687631732 | 0            | -0.343815866 |
| 0            | -0.690307613 | -0.345153807 |
| 0            | -0.694054681 | -0.347027341 |
| 0            | -0.702637561 | -0.351318781 |
| -0.794368987 | 0.084771604  | -0.354798692 |
| -0.404771763 | -0.305442832 | -0.355107297 |
| -0.712390496 | 0            | -0.356195248 |
| 0            | -0.721725026 | -0.360862513 |
| -0.181837954 | -0.545567808 | -0.363702881 |
| -0.731328402 | 0            | -0.365664201 |
| -0.179233078 | -0.554954012 | -0.367093545 |
| -0.555210106 | -0.185257018 | -0.370233562 |
| -0.555307508 | -0.185356754 | -0.370332131 |
| 0            | -0.740728784 | -0.370364392 |
| 0            | -0.744066162 | -0.372033081 |
| -0.746363108 | 0            | -0.373181554 |
| 0            | -0.747883786 | -0.373941893 |
| -0.279781843 | -0.471820219 | -0.375801031 |
| -0.540083647 | -0.218573506 | -0.379328576 |
| -0.760130207 | 0            | -0.380065103 |
| -0.117124756 | -0.644503056 | -0.380813906 |
| 0            | -0.762245423 | -0.381122712 |
| -0.291262382 | -0.47225991  | -0.381761146 |
| 0            | -0.763946142 | -0.381973071 |
| -0.12871466  | -0.635368944 | -0.382041802 |
| -0.765709101 | 0            | -0.382854551 |
| -0.329473308 | -0.436758009 | -0.383115659 |
| -0.767308484 | 0            | -0.383654242 |
| -0.340661265 | -0.426804148 | -0.383732707 |
| -0.357877846 | -0.410802982 | -0.384340414 |
| -0.771994419 | 0            | -0.38599721  |
| -0.36439139  | -0.409927266 | -0.387159328 |
| 0            | -0.774322295 | -0.387161147 |
| 0            | -0.784929655 | -0.392464827 |
| -0.508707076 | -0.276761695 | -0.392734386 |
| -0.326624576 | -0.465720247 | -0.396172412 |
| 0            | -0.801958379 | -0.400979189 |
| 0            | -0.802358536 | -0.401179268 |
| -0.290578611 | -0.512371246 | -0.401474928 |
| 0            | -0.806902919 | -0.403451459 |
| -0.81107296  | 0            | -0.40553648  |
| 0            | -0.816146995 | -0.408073498 |
| 0            | -0.821342257 | -0.410671129 |



|              |              |              |
|--------------|--------------|--------------|
| 0            | -0.822156661 | -0.41107833  |
| -0.822213739 | 0            | -0.411106869 |
| -0.823588071 | 0            | -0.411794036 |
| 0            | -0.824339107 | -0.412169553 |
| -0.495020928 | -0.330677928 | -0.412849428 |
| 0            | -0.827169772 | -0.413584886 |
| 0            | -0.828721353 | -0.414360677 |
| 0            | -0.828721353 | -0.414360677 |
| -0.533221381 | -0.307411176 | -0.420316278 |
| -0.843652896 | 0            | -0.421826448 |
| -0.844906453 | 0            | -0.422453226 |
| -0.844906453 | 0            | -0.422453226 |
| 0            | -0.845337294 | -0.422668647 |
| -0.745970978 | -0.100629546 | -0.423300262 |
| -0.846755631 | 0            | -0.423377816 |
| -0.846904351 | 0            | -0.423452175 |
| -0.946787294 | 0.09800526   | -0.424391017 |
| -0.563630187 | -0.287283388 | -0.425456788 |
| -0.32748715  | -0.524122575 | -0.425804862 |
| 0            | -0.85191155  | -0.425955775 |
| -0.855374216 | 0            | -0.427687108 |
| -0.324224329 | -0.531503715 | -0.427864022 |
| -0.619141572 | -0.239600448 | -0.42937101  |
| -0.858881368 | 0            | -0.429440684 |
| -0.259973252 | -0.600208941 | -0.430091096 |
| 0            | -0.861416895 | -0.430708448 |
| -0.272001057 | -0.590943603 | -0.43147233  |
| -0.767830076 | -0.097532241 | -0.432681159 |
| 0            | -0.865452214 | -0.432726107 |
| -0.86620161  | 0            | -0.433100805 |
| 0            | -0.871969688 | -0.435984844 |
| -0.874639313 | 0            | -0.437319656 |
| -0.876088348 | 0            | -0.438044174 |
| -0.379171575 | -0.499609134 | -0.439390354 |
| -0.437035107 | -0.443608423 | -0.440321765 |
| -0.881300818 | 0            | -0.440650409 |
| -0.417168754 | -0.464250956 | -0.440709855 |
| -0.887268081 | 0            | -0.443634041 |
| -0.321957842 | -0.565782541 | -0.443870192 |
| -0.888989235 | 0            | -0.444494617 |
| -0.888989235 | 0            | -0.444494617 |
| -0.890578796 | 0            | -0.445289398 |
| -0.891868594 | 0            | -0.445934297 |
| 0            | -0.894534861 | -0.44726743  |
| -0.89913659  | 0            | -0.449568295 |
| -0.90018689  | 0            | -0.450093445 |
| -0.901117982 | 0            | -0.450558991 |

|              |              |              |
|--------------|--------------|--------------|
| -0.902038285 | 0            | -0.451019143 |
| 0            | -0.902832912 | -0.451416456 |
| -0.273460322 | -0.63230364  | -0.452881981 |
| -0.911755653 | 0            | -0.455877826 |
| -0.911948359 | 0            | -0.45597418  |
| -0.912429641 | 0            | -0.456214821 |
| -0.914818629 | 0            | -0.457409315 |
| -0.914818629 | 0            | -0.457409315 |
| -0.342271879 | -0.57267754  | -0.457474709 |
| -0.91506788  | 0            | -0.45753394  |
| -0.332001303 | -0.58457269  | -0.458286997 |
| -0.917518798 | 0            | -0.458759399 |
| -0.918736275 | 0            | -0.459368137 |
| -0.919651669 | 0            | -0.459825835 |
| -0.293958016 | -0.628175612 | -0.461066814 |
| -0.63616004  | -0.290581195 | -0.463370618 |
| -0.927196757 | 0            | -0.463598378 |
| -0.869703741 | -0.060249221 | -0.464976481 |
| 0            | -0.93026952  | -0.46513476  |
| 0            | -0.931836518 | -0.465918259 |
| -0.444387067 | -0.488566431 | -0.466476749 |
| -0.276758302 | -0.65691552  | -0.466836911 |
| -0.921446761 | -0.015427457 | -0.468437109 |
| 0            | -0.938000137 | -0.469000068 |
| -0.939140672 | 0            | -0.469570336 |
| -0.166169431 | -0.776642024 | -0.471405727 |
| -0.945292965 | 0            | -0.472646483 |
| 0            | -0.947456407 | -0.473728203 |
| -0.954121092 | 0            | -0.477060546 |
| 0            | -0.960378414 | -0.480189207 |
| -0.889931018 | -0.077530677 | -0.483730848 |
| 0            | -0.96803954  | -0.48401977  |
| 0            | -0.968351793 | -0.484175896 |
| -0.970804244 | 0            | -0.485402122 |
| -0.742627708 | -0.231725032 | -0.48717637  |
| -0.982198204 | 0            | -0.491099102 |
| 0            | -0.985922284 | -0.492961142 |
| -0.50618689  | -0.480371953 | -0.493279421 |
| -1.112278847 | 0.125215835  | -0.493531506 |
| 0            | -0.987829943 | -0.493914971 |
| -0.990990681 | 0            | -0.495495341 |
| 0            | -0.993403951 | -0.496701975 |
| -0.479560601 | -0.515625592 | -0.497593097 |
| 0            | -0.999709418 | -0.499854709 |
| -1.003707226 | 0            | -0.501853613 |
| -0.512983302 | -0.49832273  | -0.505653016 |
| -1.019171938 | 0            | -0.509585969 |

|              |              |              |
|--------------|--------------|--------------|
| 0            | -1.020828247 | -0.510414124 |
| 0            | -1.020828247 | -0.510414124 |
| -1.02093524  | 0            | -0.51046762  |
| -0.819362062 | -0.201774642 | -0.510568352 |
| 0            | -1.024793877 | -0.512396938 |
| 0            | -1.028241256 | -0.514120628 |
| 0            | -1.028714897 | -0.514357448 |
| 0            | -1.028795423 | -0.514397711 |
| 0            | -1.043730376 | -0.521865188 |
| 0            | -1.044441501 | -0.52222075  |
| 0            | -1.058321749 | -0.529160874 |
| 0            | -1.058700823 | -0.529350412 |
| -0.66332127  | -0.395914002 | -0.529617636 |
| 1.009623273  | -2.070547261 | -0.530461994 |
| -0.329836792 | -0.735106073 | -0.532471432 |
| -0.582618248 | -0.483607484 | -0.533112866 |
| 0            | -1.06679452  | -0.53339726  |
| 0            | -1.06679452  | -0.53339726  |
| -1.068022169 | 0            | -0.534011085 |
| 0            | -1.068866234 | -0.534433117 |
| 0            | -1.069005017 | -0.534502509 |
| 0            | -1.069005017 | -0.534502509 |
| -1.072510703 | 0            | -0.536255352 |
| 0            | -1.075262896 | -0.537631448 |
| 0            | -1.077240089 | -0.538620044 |
| 0            | -1.078593925 | -0.539296962 |
| -0.497127068 | -0.583065869 | -0.540096468 |
| -1.081061848 | 0            | -0.540530924 |
| 0            | -1.083949754 | -0.541974877 |
| 0            | -1.085363967 | -0.542681983 |
| 0            | -1.085807201 | -0.542903601 |
| 0            | -1.086041446 | -0.543020723 |
| 0            | -1.086708286 | -0.543354143 |
| 0            | -1.088827107 | -0.544413554 |
| 0            | -1.09115988  | -0.54557994  |
| -0.158695901 | -0.937793129 | -0.548244515 |
| -0.458626424 | -0.642434869 | -0.550530647 |
| -1.10258045  | 0            | -0.551290225 |
| 0            | -1.106298836 | -0.553149418 |
| 0            | -1.107262604 | -0.553631302 |
| -1.1087805   | 0            | -0.55439025  |
| -0.267159152 | -0.842844571 | -0.555001862 |
| -1.110744937 | 0            | -0.555372468 |
| 0            | -1.114966875 | -0.557483437 |
| 0            | -1.129159246 | -0.564579623 |
| 0            | -1.129159246 | -0.564579623 |
| 0            | -1.133486313 | -0.566743157 |

|              |              |              |
|--------------|--------------|--------------|
| -0.683607937 | -0.454457572 | -0.569032754 |
| 0.103134203  | -1.257023209 | -0.576944503 |
| -0.426987652 | -0.735563935 | -0.581275793 |
| 0            | -1.163718256 | -0.581859128 |
| -1.165441439 | 0            | -0.582720719 |
| -0.941099945 | -0.225743444 | -0.583421695 |
| -0.6012321   | -0.566915778 | -0.584073939 |
| 0            | -1.174194115 | -0.587097058 |
| 0            | -1.179413187 | -0.589706594 |
| 0            | -1.184727896 | -0.592363948 |
| -0.678999075 | -0.5105541   | -0.594776587 |
| -0.575548556 | -0.639841438 | -0.607694997 |
| -0.798012032 | -0.420389588 | -0.60920081  |
| 0            | -1.233817362 | -0.616908681 |
| -1.243914436 | 0            | -0.621957218 |
| -0.424564701 | -0.823065171 | -0.623814936 |
| -0.432122038 | -0.821959986 | -0.627041012 |
| -1.258912951 | 0            | -0.629456476 |
| -0.604458155 | -0.655099024 | -0.62977859  |
| -0.896789314 | -0.371563925 | -0.63417662  |
| -1.268641995 | 0            | -0.634320998 |
| 0            | -1.276982475 | -0.638491238 |
| -1.27781568  | 0            | -0.638890784 |
| -0.450069102 | -0.830212238 | -0.64014067  |
| -1.285138767 | 0            | -0.642569383 |
| 0            | -1.290207567 | -0.645103783 |
| -0.673150216 | -0.619151663 | -0.64615094  |
| -0.403804681 | -0.89165353  | -0.647729106 |
| -1.296128193 | 0            | -0.648064096 |
| -0.463540437 | -0.839051443 | -0.65129594  |
| 0            | -1.327498981 | -0.663749491 |
| -0.304198068 | -1.030376836 | -0.667287452 |
| -0.801340241 | -0.540046103 | -0.670693172 |
| -0.855343892 | -0.48955492  | -0.672449406 |
| -1.082548954 | -0.265173668 | -0.673861311 |
| 0            | -1.360152924 | -0.680076462 |
| -1.360676955 | 0            | -0.680338478 |
| -1.363011393 | 0            | -0.681505697 |
| -1.366532956 | 0            | -0.683266478 |
| -0.754638195 | -0.615436044 | -0.685037119 |
| -1.372920746 | 0            | -0.686460373 |
| -0.619715549 | -0.753954392 | -0.686834971 |
| 0            | -1.382489265 | -0.691244633 |
| -1.382755394 | 0            | -0.691377697 |
| -0.851692388 | -0.536511458 | -0.694101923 |
| 0            | -1.396162489 | -0.698081244 |
| -1.401958954 | 0            | -0.700979477 |

|              |              |              |
|--------------|--------------|--------------|
| -0.760142337 | -0.648538462 | -0.704340399 |
| -0.426343401 | -1.001129291 | -0.713736346 |
| -0.832931405 | -0.598117747 | -0.715524576 |
| 0            | -1.432497535 | -0.716248768 |
| -1.442996441 | 0            | -0.721498221 |
| -0.873612192 | -0.57137634  | -0.722494266 |
| -0.943958323 | -0.50482367  | -0.724390996 |
| -1.458725738 | 0            | -0.729362869 |
| -0.996059521 | -0.464635742 | -0.730347632 |
| -0.799683095 | -0.665775413 | -0.732729254 |
| 0            | -1.466052883 | -0.733026442 |
| -0.884547553 | -0.587678035 | -0.736112794 |
| 0            | -1.479207551 | -0.739603775 |
| -0.74081772  | -0.7494541   | -0.74513591  |
| 0            | -1.494436773 | -0.747218386 |
| 0            | -1.494436773 | -0.747218386 |
| -0.811170985 | -0.686275426 | -0.748723205 |
| 0            | -1.499653367 | -0.749826684 |
| 0            | -1.519906968 | -0.759953484 |
| -1.520627025 | 0            | -0.760313513 |
| 0            | -1.521378246 | -0.760689123 |
| 0            | -1.529954169 | -0.764977085 |
| 0            | -1.532741433 | -0.766370717 |
| -0.750786913 | -0.783246782 | -0.767016847 |
| 0            | -1.545260489 | -0.772630245 |
| 0            | -1.561349708 | -0.780674854 |
| 0            | -1.56462621  | -0.782313105 |
| -0.730207263 | -0.850081067 | -0.790144165 |
| -0.878833394 | -0.708452992 | -0.793643193 |
| 0            | -1.595631286 | -0.797815643 |
| 0.549967491  | -2.150237086 | -0.800134798 |
| -1.605239936 | 0            | -0.802619968 |
| -0.253327388 | -1.354528347 | -0.803927867 |
| -0.962468306 | -0.651643631 | -0.807055969 |
| 0            | -1.620912109 | -0.810456055 |
| 0            | -1.621602148 | -0.810801074 |
| -1.622978377 | 0            | -0.811489188 |
| -1.622978377 | 0            | -0.811489188 |
| -0.784218624 | -0.841046871 | -0.812632747 |
| -1.625359736 | 0            | -0.812679868 |
| -0.628463202 | -0.999960694 | -0.814211948 |
| -0.779925743 | -0.853726402 | -0.816826073 |
| 0            | -1.639163964 | -0.819581982 |
| 0.54380897   | -2.186251601 | -0.821221316 |
| -0.244984337 | -1.407547246 | -0.826265792 |
| -0.894588631 | -0.75850422  | -0.826546426 |
| 0            | -1.657157971 | -0.828578986 |

|              |              |              |
|--------------|--------------|--------------|
| -1.657949349 | 0            | -0.828974674 |
| 0.554182722  | -2.217596988 | -0.831707133 |
| 0            | -1.663643676 | -0.831821838 |
| 0            | -1.664059213 | -0.832029606 |
| 0            | -1.66640015  | -0.833200075 |
| -0.736269696 | -0.93263189  | -0.834450793 |
| 0.552461907  | -2.232023524 | -0.839780808 |
| 0.554168738  | -2.235451602 | -0.840641432 |
| -0.77064519  | -0.911361089 | -0.84100314  |
| 0.551482973  | -2.235825728 | -0.842171378 |
| 0.546454464  | -2.234490417 | -0.844017977 |
| 0            | -1.693340677 | -0.846670339 |
| -0.635029079 | -1.06318689  | -0.849107984 |
| -1.71247214  | 0            | -0.85623607  |
| -1.180057434 | -0.534033067 | -0.85704525  |
| -0.27033483  | -1.4488751   | -0.859604965 |
| 0.545356118  | -2.266287294 | -0.860465588 |
| 0.453134341  | -2.188756229 | -0.867810944 |
| 0.187322247  | -1.924967664 | -0.868822709 |
| -0.982364121 | -0.756055107 | -0.869209614 |
| -0.982364121 | -0.756055107 | -0.869209614 |
| 0            | -1.740007955 | -0.870003977 |
| 0            | -1.740036854 | -0.870018427 |
| 0            | -1.741432415 | -0.870716207 |
| 0.547554084  | -2.289092753 | -0.870769335 |
| 0.547554084  | -2.289092753 | -0.870769335 |
| 0.437167431  | -2.178826802 | -0.870829686 |
| 0            | -1.749303944 | -0.874651972 |
| 0.568512179  | -2.324086181 | -0.877787001 |
| -0.79155039  | -0.970829633 | -0.881190012 |
| 0            | -1.76258972  | -0.88129486  |
| 0.417915155  | -2.181573267 | -0.881829056 |
| 0.417915155  | -2.181573267 | -0.881829056 |
| 0.417221099  | -2.182633812 | -0.882706357 |
| -1.348071368 | -0.418213027 | -0.883142197 |
| 0.564258024  | -2.331302249 | -0.883522112 |
| 0.421750314  | -2.189143213 | -0.88369645  |
| -0.817837552 | -0.951667992 | -0.884752772 |
| 0            | -1.773271686 | -0.886635843 |
| 0            | -1.773271686 | -0.886635843 |
| -0.849003281 | -0.925525962 | -0.887264621 |
| 0.419923916  | -2.194638354 | -0.887357219 |
| 0.408013854  | -2.183292979 | -0.887639563 |
| 0            | -1.776050215 | -0.888025107 |
| 0.405309368  | -2.182451302 | -0.888570967 |
| -0.720926826 | -1.056219838 | -0.888573332 |
| -0.49435845  | -1.283653548 | -0.889005999 |

|              |              |              |
|--------------|--------------|--------------|
| 0.410674149  | -2.1895225   | -0.889424176 |
| 0            | -1.780751389 | -0.890375695 |
| 0.536735619  | -2.330233296 | -0.896748838 |
| 0.348501705  | -2.145266028 | -0.898382162 |
| 0.348501705  | -2.145266028 | -0.898382162 |
| 0            | -1.796977378 | -0.898488689 |
| 0.416934954  | -2.216794886 | -0.899929966 |
| -1.080794245 | -0.728680141 | -0.904737193 |
| -1.312531564 | -0.499103017 | -0.905817291 |
| -1.312531564 | -0.499103017 | -0.905817291 |
| 0.41637185   | -2.230497513 | -0.907062831 |
| 0.577358551  | -2.393435795 | -0.908038622 |
| -1.635655347 | -0.181061918 | -0.908358632 |
| 0            | -1.81702788  | -0.90851394  |
| -1.042256068 | -0.775386388 | -0.908821228 |
| 0.43260106   | -2.253514585 | -0.910456763 |
| 0            | -1.823231733 | -0.911615866 |
| 0.428683765  | -2.259000307 | -0.915158271 |
| -0.890543034 | -0.940095344 | -0.915319189 |
| 0            | -1.832257293 | -0.916128646 |
| -0.70490397  | -1.130731756 | -0.917817863 |
| 0            | -1.837835306 | -0.918917653 |
| 0            | -1.83881283  | -0.919406415 |
| 0            | -1.843490154 | -0.921745077 |
| 0            | -1.8446211   | -0.92231055  |
| -1.165747565 | -0.680019983 | -0.922883774 |
| -0.910522983 | -0.938304069 | -0.924413526 |
| 0.39612875   | -2.246527393 | -0.925199322 |
| -0.907194157 | -0.947210808 | -0.927202483 |
| -1.017158437 | -0.838136659 | -0.927647548 |
| -0.580543023 | -1.276568199 | -0.928555611 |
| -0.999754138 | -0.8574061   | -0.928580119 |
| 0.396806142  | -2.254503613 | -0.928848735 |
| 0            | -1.865179058 | -0.932589529 |
| -0.288657784 | -1.579986269 | -0.934322026 |
| 0            | -1.875350783 | -0.937675391 |
| 0.414891471  | -2.29259306  | -0.938850794 |
| 0.40858275   | -2.287319963 | -0.939368607 |
| 0.429311834  | -2.316337093 | -0.94351263  |
| 0            | -1.889776592 | -0.944888296 |
| -0.302484853 | -1.591976532 | -0.947230692 |
| -0.302484853 | -1.591976532 | -0.947230692 |
| 0            | -1.895187185 | -0.947593592 |
| 0.346324188  | -2.242929193 | -0.948302502 |
| 0.400601317  | -2.309253611 | -0.954326147 |
| 0            | -1.913279736 | -0.956639868 |
| -0.923807044 | -0.99747685  | -0.960641947 |

|              |              |              |
|--------------|--------------|--------------|
| -0.86094177  | -1.069711092 | -0.965326431 |
| -0.329584889 | -1.601339522 | -0.965462205 |
| -1.112490667 | -0.821863208 | -0.967176938 |
| 0.386630484  | -2.321452998 | -0.967411257 |
| 0            | -1.939626911 | -0.969813456 |
| 0            | -1.949066399 | -0.974533199 |
| -1.10018404  | -0.851805367 | -0.975994703 |
| 0            | -1.964987696 | -0.982493848 |
| 0            | -1.969232925 | -0.984616463 |
| -0.269001057 | -1.709469068 | -0.989235062 |
| -0.95885824  | -1.024165278 | -0.991511759 |
| 0            | -1.990977512 | -0.995488756 |
| 0            | -2.001062585 | -1.000531292 |
| 0            | -2.001083305 | -1.000541652 |
| 0            | -2.008509394 | -1.004254697 |
| 0            | -2.010696523 | -1.005348262 |
| 0.399756146  | -2.414671404 | -1.007457629 |
| -1.045221653 | -0.970583131 | -1.007902392 |
| 0            | -2.016936334 | -1.008468167 |
| 0            | -2.017322309 | -1.008661154 |
| 0            | -2.017322309 | -1.008661154 |
| -1.256662354 | -0.762487867 | -1.009575111 |
| -1.256662354 | -0.762487867 | -1.009575111 |
| 0            | -2.022316596 | -1.011158298 |
| -1.153583268 | -0.869060075 | -1.011321671 |
| 0            | -2.023302681 | -1.011651341 |
| 0            | -2.023302681 | -1.011651341 |
| -0.996521509 | -1.027515286 | -1.012018397 |
| 0            | -2.027142921 | -1.01357146  |
| -0.952755889 | -1.07541418  | -1.014085035 |
| 0            | -2.032462035 | -1.016231018 |
| -0.823702157 | -1.20943127  | -1.016566713 |
| -2.03401789  | 0            | -1.017008945 |
| 0            | -2.034386721 | -1.017193361 |
| -1.173895137 | -0.865185514 | -1.019540325 |
| -0.320825824 | -1.718402621 | -1.019614223 |
| 0            | -2.044012847 | -1.022006423 |
| 0            | -2.050239701 | -1.02511985  |
| 0            | -2.050536043 | -1.025268022 |
| -0.969606665 | -1.084322154 | -1.026964409 |
| 0            | -2.059302873 | -1.029651436 |
| -0.99747626  | -1.063646857 | -1.030561559 |
| -1.000924242 | -1.061798851 | -1.031361546 |
| -1.001268482 | -1.061818775 | -1.031543628 |
| -1.109396106 | -0.955079564 | -1.032237835 |
| -1.02072189  | -1.044995939 | -1.032858915 |
| 0            | -2.06711942  | -1.03355971  |



|              |              |              |
|--------------|--------------|--------------|
| 0            | -2.06711942  | -1.03355971  |
| -1.059632406 | -1.011786714 | -1.03570956  |
| -1.047554634 | -1.031669677 | -1.039612156 |
| -0.629148833 | -1.45341475  | -1.041281791 |
| -0.997527841 | -1.094792869 | -1.046160355 |
| -0.997527841 | -1.094792869 | -1.046160355 |
| 0            | -2.098249736 | -1.049124868 |
| 0            | -2.101999839 | -1.05099992  |
| -0.391344717 | -1.712797302 | -1.052071009 |
| 0            | -2.108820393 | -1.054410196 |
| 0            | -2.109374892 | -1.054687446 |
| 0            | -2.109387534 | -1.054693767 |
| -0.365901431 | -1.752562964 | -1.059232198 |
| -0.365901431 | -1.752562964 | -1.059232198 |
| -1.03843513  | -1.080589714 | -1.059512422 |
| -0.360348154 | -1.761687713 | -1.061017934 |
| 0            | -2.125052085 | -1.062526043 |
| -0.319587744 | -1.811810599 | -1.065699172 |
| -0.051822345 | -2.081677004 | -1.066749675 |
| 0            | -2.133836853 | -1.066918426 |
| 0            | -2.133836853 | -1.066918426 |
| -1.006261197 | -1.128469484 | -1.067365341 |
| -1.134910782 | -1.000256918 | -1.06758385  |
| -2.139663202 | 0            | -1.069831601 |
| -0.354853258 | -1.785893397 | -1.070373327 |
| -0.263784254 | -1.877430531 | -1.070607393 |
| -1.05067705  | -1.098920789 | -1.074798919 |
| -0.351591138 | -1.806714772 | -1.079152955 |
| -1.03763016  | -1.125761822 | -1.081695991 |
| -1.021065248 | -1.150168179 | -1.085616713 |
| -0.885303458 | -1.285976203 | -1.085639831 |
| -0.885303458 | -1.285976203 | -1.085639831 |
| -0.288548727 | -1.886128034 | -1.087338381 |
| -0.911185211 | -1.265052452 | -1.088118832 |
| -2.180577346 | 0            | -1.090288673 |
| -2.182853306 | 0            | -1.091426653 |
| 0            | -2.193806711 | -1.096903355 |
| -0.993888832 | -1.200210144 | -1.097049488 |
| -0.960462758 | -1.238269037 | -1.099365897 |
| -1.076027273 | -1.136076562 | -1.106051917 |
| -0.366612345 | -1.851000591 | -1.108806468 |
| -0.355733688 | -1.875263738 | -1.115498713 |
| -0.962150975 | -1.26902649  | -1.115588732 |
| -0.364355149 | -1.868124904 | -1.116240026 |
| -2.235315533 | 0            | -1.117657766 |
| 0            | -2.236997379 | -1.11849869  |
| -0.390744371 | -1.860363379 | -1.125553875 |

|              |              |              |
|--------------|--------------|--------------|
| -0.348375367 | -1.904115893 | -1.12624563  |
| 0            | -2.259676125 | -1.129838063 |
| -1.049622597 | -1.216076707 | -1.132849652 |
| -2.267329524 | 0            | -1.133664762 |
| -0.951195034 | -1.326969402 | -1.139082218 |
| 0            | -2.295196064 | -1.147598032 |
| -0.946446232 | -1.357774678 | -1.152110455 |
| -1.06370754  | -1.24212838  | -1.15291796  |
| 0            | -2.31051082  | -1.15525541  |
| -1.40809495  | -0.919268765 | -1.163681858 |
| -1.074560175 | -1.256337816 | -1.165448996 |
| -2.335918454 | 0            | -1.167959227 |
| -1.258453116 | -1.077943457 | -1.168198286 |
| -0.425825472 | -1.917650458 | -1.171737965 |
| -1.665580447 | -0.679455285 | -1.172517866 |
| -1.196299718 | -1.164702635 | -1.180501176 |
| -1.200897063 | -1.163504741 | -1.182200902 |
| -1.108968628 | -1.260381384 | -1.184675006 |
| -1.16313912  | -1.216702306 | -1.189920713 |
| -1.206611608 | -1.188390235 | -1.197500922 |
| -1.195927111 | -1.220885889 | -1.2084065   |
| -1.434499072 | -0.995098681 | -1.214798876 |
| 0            | -2.431598273 | -1.215799136 |
| -1.200807249 | -1.231660128 | -1.216233688 |
| 0            | -2.433015589 | -1.216507795 |
| -1.426938532 | -1.016382067 | -1.2216603   |
| -1.248997936 | -1.206627894 | -1.227812915 |
| -1.103028718 | -1.357157935 | -1.230093326 |
| -1.037924822 | -1.422494764 | -1.230209793 |
| -1.305185742 | -1.166570807 | -1.235878274 |
| -2.476452143 | 0            | -1.238226071 |
| -1.396569708 | -1.086694935 | -1.241632321 |
| -1.285588205 | -1.219248005 | -1.252418105 |
| -1.295264901 | -1.228533164 | -1.261899033 |
| 0            | -2.535512278 | -1.267756139 |
| -2.015278412 | -0.526148801 | -1.270713606 |
| -1.174704045 | -1.369238935 | -1.27197149  |
| -1.460995438 | -1.103048741 | -1.28202209  |
| -1.158431499 | -1.406663052 | -1.282547276 |
| -1.324666831 | -1.256479364 | -1.290573097 |
| -1.011909721 | -1.573630165 | -1.292769943 |
| -1.477391204 | -1.119413987 | -1.298402595 |
| -1.48077409  | -1.126543319 | -1.303658705 |
| 0            | -2.62020703  | -1.310103515 |
| 0            | -2.667761401 | -1.333880701 |
| 0            | -2.668669953 | -1.334334977 |
| -1.238810579 | -1.441345727 | -1.340078153 |

|              |              |              |
|--------------|--------------|--------------|
| -1.215534211 | -1.46926385  | -1.342399031 |
| 0            | -2.688889773 | -1.344444887 |
| 0            | -2.697058434 | -1.348529217 |
| 0            | -2.705539179 | -1.352769589 |
| 0            | -2.714900628 | -1.357450314 |
| -1.21423285  | -1.504095293 | -1.359164072 |
| 0            | -2.719865735 | -1.359932868 |
| 0            | -2.723069503 | -1.361534751 |
| -1.268623439 | -1.454543447 | -1.361583443 |
| 0            | -2.729606004 | -1.364803002 |
| -1.213214819 | -1.521394989 | -1.367304904 |
| -1.57641939  | -1.159117868 | -1.367768629 |
| 0            | -2.738577594 | -1.369288797 |
| 0            | -2.740561208 | -1.370280604 |
| 0            | -2.744871772 | -1.372435886 |
| 0            | -2.744926196 | -1.372463098 |
| 0            | -2.757637301 | -1.378818651 |
| 0            | -2.762468431 | -1.381234216 |
| -0.413843369 | -2.349014794 | -1.381429081 |
| 0            | -2.767352773 | -1.383676387 |
| 0            | -2.772045984 | -1.386022992 |
| 0            | -2.784477586 | -1.392238793 |
| 0            | -2.785348661 | -1.39267433  |
| -1.395965651 | -1.39285618  | -1.394410916 |
| 0            | -2.79545261  | -1.397726305 |
| 0            | -2.795917649 | -1.397958825 |
| 0            | -2.796193724 | -1.398096862 |
| 0            | -2.797259799 | -1.3986299   |
| -1.816215822 | -0.989426197 | -1.40282101  |
| 0            | -2.820925647 | -1.410462824 |
| 0            | -2.823014051 | -1.411507025 |
| 0            | -2.824998937 | -1.412499469 |
| 0            | -2.824998937 | -1.412499469 |
| 0            | -2.827062521 | -1.413531261 |
| 0            | -2.844250008 | -1.422125004 |
| 0            | -2.852612448 | -1.426306224 |
| 0            | -2.854156031 | -1.427078015 |
| 0            | -2.854156031 | -1.427078015 |
| 0            | -2.857369201 | -1.428684601 |
| -1.377305142 | -1.482376794 | -1.429840968 |
| 0            | -2.863540479 | -1.431770239 |
| 0            | -2.863973515 | -1.431986758 |
| 0            | -2.865124519 | -1.432562259 |
| 0            | -2.871445367 | -1.435722683 |
| 0            | -2.871445367 | -1.435722683 |
| 0            | -2.877553256 | -1.438776628 |
| 0            | -2.878889062 | -1.439444531 |

|              |              |              |
|--------------|--------------|--------------|
| 0            | -2.882261723 | -1.441130862 |
| 0            | -2.884577167 | -1.442288583 |
| -1.385817654 | -1.506032445 | -1.44592505  |
| 0            | -2.893543016 | -1.446771508 |
| -1.52525611  | -1.369721079 | -1.447488595 |
| 0            | -2.897614915 | -1.448807458 |
| 0            | -2.903733207 | -1.451866604 |
| -1.475327916 | -1.430491319 | -1.452909618 |
| 0            | -2.907963979 | -1.453981989 |
| 0            | -2.907963979 | -1.453981989 |
| -1.205880451 | -1.703307163 | -1.454593807 |
| -1.464061114 | -1.44550375  | -1.454782432 |
| -1.464061114 | -1.44550375  | -1.454782432 |
| 0            | -2.91052692  | -1.45526346  |
| 0            | -2.91052692  | -1.45526346  |
| 0            | -2.912068033 | -1.456034017 |
| 0            | -2.914376635 | -1.457188318 |
| 0            | -2.922018224 | -1.461009112 |
| 0            | -2.922212746 | -1.461106373 |
| 0            | -2.938382462 | -1.469191231 |
| 0            | -2.938990458 | -1.469495229 |
| 0            | -2.940671942 | -1.470335971 |
| 0            | -2.943055733 | -1.471527867 |
| 0            | -2.945456531 | -1.472728266 |
| 0            | -2.95320048  | -1.47660024  |
| -1.363083881 | -1.590857698 | -1.476970789 |
| 0            | -2.959029273 | -1.479514636 |
| 0            | -2.962907043 | -1.481453522 |
| -1.444702304 | -1.527058841 | -1.485880573 |
| 0            | -2.972970257 | -1.486485128 |
| 0            | -2.976134561 | -1.48806728  |
| -1.422981778 | -1.574020445 | -1.498501111 |
| -1.497241342 | -1.500134895 | -1.498688119 |
| 0            | -3.012438051 | -1.506219025 |
| 0            | -3.012438051 | -1.506219025 |
| -1.478158819 | -1.534662427 | -1.506410623 |
| 0            | -3.015640226 | -1.507820113 |
| -1.421144252 | -1.595882227 | -1.508513239 |
| 0            | -3.024173796 | -1.512086898 |
| -1.705821125 | -1.325645758 | -1.515733441 |
| -1.574795824 | -1.456709898 | -1.515752861 |
| 0            | -3.03270791  | -1.516353955 |
| -1.888134897 | -1.145894894 | -1.517014895 |
| -1.472643618 | -1.567713518 | -1.520178568 |
| 0            | -3.046572347 | -1.523286174 |
| 0            | -3.046572347 | -1.523286174 |
| -1.934475807 | -1.113437787 | -1.523956797 |

|              |              |              |
|--------------|--------------|--------------|
| 0            | -3.060187445 | -1.530093723 |
| -1.511503555 | -1.588901284 | -1.550202419 |
| -1.651662832 | -1.458585609 | -1.555124221 |
| 0            | -3.111625068 | -1.555812534 |
| -1.4891768   | -1.626039551 | -1.557608176 |
| 0            | -3.116904556 | -1.558452278 |
| 0            | -3.116904556 | -1.558452278 |
| -1.551654749 | -1.565852083 | -1.558753416 |
| -1.576091166 | -1.570079995 | -1.57308558  |
| -1.554238777 | -1.602113993 | -1.578176385 |
| -1.381720001 | -1.785209646 | -1.583464824 |
| 0            | -3.175217784 | -1.587608892 |
| -2.023763648 | -1.153720239 | -1.588741944 |
| 0            | -3.181027722 | -1.590513861 |
| -1.597810388 | -1.594848237 | -1.596329313 |
| -1.606425797 | -1.591860226 | -1.599143011 |
| -1.606425797 | -1.591860226 | -1.599143011 |
| 0            | -3.222075436 | -1.611037718 |
| -1.933974933 | -1.31420391  | -1.624089422 |
| 0            | -3.266813693 | -1.633406847 |
| -0.916617011 | -2.36760496  | -1.642110986 |
| -1.786636641 | -1.501907551 | -1.644272096 |
| 0            | -3.321891787 | -1.660945894 |
| 0            | -3.375259029 | -1.687629515 |
| 0            | -3.486753501 | -1.743376751 |
| -2.01006776  | -1.525446271 | -1.767757016 |
| -1.804773434 | -1.799839017 | -1.802306225 |
| -1.976534956 | -1.674877041 | -1.825705999 |
| -2.479537272 | -1.207183644 | -1.843360458 |
| -0.740405573 | -2.972108495 | -1.856257034 |
| -0.769603471 | -2.944069844 | -1.856836657 |
| -0.786664754 | -2.941520107 | -1.864092431 |
| -0.776786477 | -2.954072821 | -1.865429649 |
| -0.785048765 | -2.947492831 | -1.866270798 |
| -2.099069228 | -1.635924045 | -1.867496636 |
| -0.755356402 | -2.999934693 | -1.877645547 |
| -0.787498643 | -2.968496056 | -1.877997349 |
| -2.132167166 | -1.638948962 | -1.885558064 |
| -1.656054271 | -2.146257523 | -1.901155897 |
| -2.201416637 | -1.638960377 | -1.920188507 |
| -0.71823746  | -3.160074768 | -1.939156114 |
| -0.759894082 | -3.124766802 | -1.942330442 |
| -0.746034184 | -3.140914863 | -1.943474524 |
| -0.746034184 | -3.140914863 | -1.943474524 |
| -2.297134678 | -1.649156828 | -1.973145753 |
| -2.442623568 | -1.506412397 | -1.974517982 |
| -2.293261972 | -1.760836336 | -2.027049154 |

|              |              |              |
|--------------|--------------|--------------|
| -1.211262629 | -2.960357833 | -2.085810231 |
| -2.593743353 | -1.735690942 | -2.164717148 |
| -2.566734322 | -2.283206043 | -2.424970183 |
